# Supplementary material for: Deep sequencing the circadian and diurnal transcriptome ofDrosophilabrain
Source: HighWire-hosted journal article supplement (doi:10.1101/gr.128876.111), 2012-04-03
Supplement: SuppLegends.docx [file SuppLegends.docx]

**SUPPLEMENTAL INFORMATION:**

**Figure S1: RNA sequencing reliably detects expression circadian oscillations.**  Averaged, normalized double-plotted actograms for wild-type **(A)** and per0 **(B)** flies in LD and DD. The flies in each experiment were switched to constant darkness at the point indicated by the red asterisks (N=32). As expected, wild-type animals are rhythmic with periods slightly shorter than 24-hours in DD. In contrast, *per0* animals are arrhythmic in DD. In **(C)** and **(D)**, Raw RNA-seq reads were aligned to the genome and transcriptome using RUM and expression levels (presented as RPKM) were calculated. Exon **(C)** and intron **(D)** expression levels show a high degree of reproducibility with R-squared values between replicates on the order of 0.99 and 0.80 respectively. Intronic reads derive in part from transcripts whose introns have not been fully excised, as well as possible novel transcription units. **(E)** Greater reproducibility between replicate transcript expression levels was seen when non-uniquely aligning reads were included in the RPKM calculations, indicating that multiply-aligning reads are informative for expression levels for at least some transcripts. RNA-seq RPKM values were directly compared to qPCR quantitation for known circadian genes, including *Clock* **(F)**, *period*, *timeless*, and *vrille* (data not shown). In every case tested, qPCR and RNA-seq measurements were in close agreement.

**Figure S2: Functional classes of genes differentially regulated by *period*. (A)** Fold changes (FC) of median-normalized expression values from genes involved in drug metabolism and regulated by *period* are displayed as a heatmap. **(B)** Fold changes of median-normalized expression values from genes involved in phototransduction and regulated by *period* are displayed as a heatmap. **(C)** Molecular functions (as annotated in Flybase) of genes differentially regulated by *per* are shown as a pie chart. **(D)** To verify that the difference in phototransduction mRNA abundance is not due to different amounts of eye-tissue in the sequenced RNA samples, the fold change of additional *Nina*-family members is shown. *Nina* genes encode various photoreceptor-specific proteins.

**Figure S3: Validation of *Uhg* cycling.** Semi-quantitative rtPCR was used to measure the expression levels of *Uhg* genes as well as a loading control, *EIF4G* (bottom). The abundance of *Uhg1-6* is higher during the light phase than the dark phase and generally consistent with the expression levels measured by RNA-seq (**Figure 5A**). For *Uhg8*, expression was only detectable by rtPCR at ZT0 and ZT6, consistent with a circadian oscillation peaking during the light phase. Although *EIF4G* shows a modest decrease in abundance at ZT6 on the first day, this variation would tend to under-estimate rather than over-estimate the amplitude of *Uhg* daily variation.

**Figure S4: Neither *Fibrillarin* nor non-*Uhg* snoRNA host genes oscillate.** Fibrillarin expression levels measured by RNA-seq do not show evidence of circadian or light dependent rhythmicity in LD **(A)** or DD **(B)**. Likewise, when the LD expression levels of non-Uhg snoRNA host genes are plotted as a heatmap **(C)**, there is no evidence for circadian or light-dependent rhythms. Similar results were found under constant conditions (data not shown).

**Figure S5: *per* loss-of-function alters RNA editing frequency in *CG42613*.** 25 RNA-seq reads that span *CG42613*’s RNA-editing site were selected at random and aligned for both wild-type (left) and *per* loss-of-function (right). The editing site is shown in bold; edited nucleotides are additionally marked in red.

**Figure S6: Validation of RNA editing quantitation.** To test the reliability of RNA-seq quantitation of RNA editing, edited transcripts were PCR amplified, cloned, and sequenced using traditional methods. We compared RNA-seq editing measurements **(A, D, G)** at ZT0 versus a conventional cloning and sequencing approach **(B, E, H)**. In every case, there was considerable agreement between both methods. To verify that these differences are due to RNA editing versus genetic polymporphisms, we directly sequenced the genomic DNA at each locus **(C, F, I)**. As expected, adenosine is the nucleotide found in the genomic DNA at each editing site (marked in blue on the chromatogram). Note that the sequencing primer used in **(F)** sequenced the anti-sense strand of CG10077; thus the editing site being assayed sequenced as a ‘T’ rather than an ‘A’.

Table S1: RUM alignment statistics for LD, polyA-amplified samples.

Table S2: RUM alignment statistics for DD, non-polyA-amplified samples.

Table S3: Transcripts differentially regulated by *per* loss-of-function in LD (q < 0.2 in both polyA and non-polyA-amplified datasets, fold change in the same direction).

Table S4: Transcripts differentially regulated by *per* loss-of-function in DD (q < 0.2).

Table S5: Genes differentially-expressed by *per* loss-of-function show sizable overlap compared to Lin et al. (2002).

Table S6: DAVID analysis of genes differentially regulated by *per* loss-of-function.

Table S7: Top cycling transcripts in LD (p < 0.05 in either JTK_Cycle or Fisher’s G-test).

Table S8: Top cycling transcripts in DD (p < 0.05 in either JTK_Cycle or Fisher’s G-test).

Table S9: Transcripts that oscillate in both wild-type and *per0*.

Table S10: Cycling statistics for circadian-regulated genes identified by Wijnen et al. (2006) and Keegan et al. (2007).

Table S11: *Uhg* cycling statistics.

Table S12: Gapped reads aligned by RUM. This file is in .bed format and can be uploaded to UCSC genome browser to visualize the genomic location of all gapped reads. Previously annotated splice junctions are depicted in dark blue, novel splicing events with canonical splice donor/acceptor sites are shown in dark green, novel splicing events without canonical splice sites are shown in light green. The number of reads per junction is given in column D.

Table S13: DAVID annotation of genes with novel splicing events (filtered to only include junctions with canonical splice sites and supported by 10 or more reads).

Table S14: Differentially-expressed alternative exons (p < 0.05 by two-way ANOVA).

Table S15: ANOVA and cycling statistics for RNA editing ratio analysis.

Table S16: Predicted sites of reverse complementarity between *Uhg*-encoded snoRNAs and the *Drosophila* transcriptome.
