# Supplementary material for: Deep sequencing the circadian and diurnal transcriptome ofDrosophilabrain
Source: HighWire-hosted journal article supplement (doi:10.1101/gr.128876.111), 2012-04-03
Supplement: Table_S1.xlsx [file Table_S1.xlsx]

## Sheet: Sheet1
Sample	Genotype	Timepoint	Replicate	Total Reads (millions)	Uniquely Aligned Reads (millions)	Total Aligned Reads (millions)	Transcripts with >1 RPKM	R-squared transcript RPKMs
1	wildtype	ZT0	1	19.9	16.1 (80.9%)	16.9 (85.0%)	32568 (75.2%)	0.981179
2	wildtype	ZT0	2	20.9	16.8 (80.5%)	17.7 (84.6%)	32680 (75.4%)
3	wildtype	ZT12	1	20.6	16.9 (82.2%)	17.7 (86.1%)	32743 (75.6%)	0.734444
4	wildtype	ZT12	2	21.5	18.7 (86.8%)	20.2 (93.8%)	32581 (75.2%)
5	yw, Per0	ZT0	1	20.9	15.8 (75.9%)	16.9 (80.8%)	32384 (74.7%)	0.9556
6	yw, Per0	ZT0	2	20.7	16.7 (81.0%)	17.6 (85.3%)	32780 (75.7%)
7	yw, Per0	ZT12	1	20.3	16.3 (80.6%)	17.3 (85.5%)	32762 (75.6%)	0.951403
8	yw, Per0	ZT12	2	20	15.3 (76.4%)	16.4 (81.9%)	32522 (75.1%)
			average	20.6	16.5 (80.5%)	17.5 (85.4%)	32678 (75.3%)	0.905656
