# Supplementary material for: Deep sequencing the circadian and diurnal transcriptome ofDrosophilabrain
Source: HighWire-hosted journal article supplement (doi:10.1101/gr.128876.111), 2012-04-03
Supplement: Table_S2.xlsx [file Table_S2.xlsx]

## Sheet: Sheet1
Sample	Genotype	Timepoint	Total Reads (millions)	Uniquely Aligned Reads (millions)	Total Aligned Reads (millions)	Transcripts with >1 RPKM	R-squared transcript RPKMs
1	wildtype	CT24	15.3	8.3 (54.4%)	10.0 (65.5%)	31751 (73.2%)	0.999694
2	wildtype	CT48	16	7.6 (47.4%)	9.6 (59.7%)	31765 (73.3%)
3	wildtype	CT28	15.9	8.1 (51.3%)	9.9 (62.0%)	32198 (74.3%)	0.997922
4	wildtype	CT52	17.5	9.0 (51.2%)	11.0 (63.0%)	31450 (72.6%)
5	wildtype	CT32	16.9	8.8 (52.7%)	10.7 (63.0%)	31818 (73.4%)	0.998691
6	wildtype	CT56	16	8.4 (53.2%)	10.1 (64.0%)	31486 (72.6%)
7	wildtype	CT36	20.1	10.6 (52.7%)	12.8 (63.6%)	32596 75.2%)	0.995859
8	wildtype	CT60	16.5	8.2 (50.0%)	10.2 (62.0%)	31576 (72.9%)
9	wildtype	CT40	15.5	8.1 (52.1%)	9.8 (62.9%)	31865 (73.5%)	0.998076
10	wildtype	CT64	17.5	8.4 (48.0%)	10.6 (60.2%)	32077 (74.0%)
11	wildtype	CT44	14.4	7.3 (50.9%)	9.0 (62.5%)	31840 73.5%)	0.999675
12	wildtype	CT68	11.4	5.4 (47.6%)	6.8 (59.9%)	32001 (73.8%)
13	period[0]	CT24	22.3	11.9 (53.4%)	14.1 (62.9%)	31058 (71.7%)	0.997273
14	period[0]	CT48	19.3	10.5 (54.1%)	12.3 (63.5%)	31147 (71.9%)
15	period[0]	CT28	18	8.4 (46.4%)	10.4 (57.6%)	30809 (71.1%)	0.998072
16	period[0]	CT52	20.1	11.1 (55.2%)	12.9 (64.3%)	31006 (71.6%)
17	period[0]	CT32	21.2	11.1 (52.2%)	13.1 (61.8%)	31120 (71.8%)	0.998973
18	period[0]	CT56	18.9	9.1 (48.3%)	11.0 (58.4%)	31130 (71.8%)
19	period[0]	CT36	17.5	10.3 (58.6%)	11.7 (66.9%)	30984 (71.5%)	0.828442
20	period[0]	CT60	16.8	8.2 (48.5%)	9.6 (57.0%)	31104 (71.8%)
21	period[0]	CT40	18.1	11.6 (63.8%)	12.9 (71.2%)	31390 (72.4%)	0.990533
22	period[0]	CT64	18.2	9.2 (50.3%)	11.1 (60.7%)	31020 (71.6%)
23	period[0]	CT44	18.4	10.3 (55.9%)	12.0 (65.1%)	31568 (72.8%)	0.826493
24	period[0]	CT68	16.7	6.8 (40.8%)	8.4 (50.2%)	31037 (71.6%)
		average	17.4	9.0 (52.0%)	10.8 (62.2%)	31480 (72.7%)	0.969142
