# Supplementary material for: Deep sequencing the circadian and diurnal transcriptome ofDrosophilabrain
Source: HighWire-hosted journal article supplement (doi:10.1101/gr.128876.111), 2012-04-03
Supplement: Table_S3.xlsx [file Table_S3.xlsx]

## Sheet: Sheet1
Transcript	location	nonPolyA genotype (per vs. CS) q-value	polyA genotype (per vs CS) q-value	nonPolyA Log2 Fold Change (WT/Per0)	polyA Log2 Fold Change (WT/PerO)
chrU_7356781_7357351.0(modencode)	chrU:7356781-7357351	0.000269425	0.0141338	-7.92957	-3.8932
nc_21090.a(modencode)	chrX:8581-9053	0.000597399	0.0171859	-4.77775	-2.05857
psnoRNA:CG32479-b(modencode)	chr3L:890260-890500	0.0144365	0.0551638	-4.55391	-1.29525
Or45b-RA(modencode)	chr2R:5447103-5448573	0.000233225	0.157157	-4.46334	-0.553303
Or45b.a(modencode)	chr2R:5446923-5448573	0.000375642	0.0654278	-4.28192	-1.12942
nc_14315.a(modencode)	chr3L:24162268-24167583	0.0175291	0.190466	-4.18528	-0.731412
lectin-28C-RA(modencode)	chr2L:7857090-7857931	0.00972252	0.0057219	-4.04704	-4.76497
nc_17701.a(modencode)	chr3R:14959226-14962285	0.00518273	0.0135476	-3.80471	-3.78066
chrU_7356394_7356636.0(modencode)	chrU:7356394-7356636	0.00639311	0.0114861	-3.62223	-5.74796
nc_21013.a(modencode)	chrU:1972142-1972541	0.000722284	0.136692	-3.28883	-0.746123
nc_6835.c(modencode)	chr2R:10511218-10512007	0.00905428	0.111805	-3.27396	-0.734136
CG10924-RA(modencode)	chr2R:14414864-14423263	0.0617341	0.005252	-3.07311	-2.82996
nc_21067.b(modencode)	chrU:7542770-7543815	0.000588407	0.0662561	-3.0107	-1.03425
nc_21067.a(modencode)	chrU:7542770-7543900	0.000588407	0.0666509	-3.00882	-1.03684
nc_21067.c(modencode)	chrU:7542770-7543877	0.000594185	0.0667509	-3.0087	-1.03891
nc_21067.d(modencode)	chrU:7542770-7543901	0.000591733	0.0666015	-3.00838	-1.03796
GstE1-RA(modencode)	chr2R:14285895-14286729	0.0562634	0.0319607	-2.97473	-0.616521
CG10924.a(modencode)	chr2R:14417543-14423263	0.064724	0.0050864	-2.95087	-2.83414
CG13822-RA(modencode)	chr3R:19502982-19504152	0.0033948	0.00608209	-2.89958	-2.91268
CG10924.c(modencode)	chr2R:14419893-14423263	0.0660925	0.0048891	-2.78219	-2.83418
CG10924.b(modencode)	chr2R:14419829-14423263	0.0654065	0.00493432	-2.7775	-2.8458
CG10924-RB(modencode)	chr2R:14419913-14423263	0.0663685	0.00494615	-2.77493	-2.81734
Cyp4p1-RA(modencode)	chr2R:5127421-5129717	0.0699652	0.0172969	-2.74524	-3.16919
snoRNA:Psi18S-1377e-RA(modencode)	chr3R:26032698-26032834	0.00076338	0.142732	-2.69591	-0.785485
chr2L_17589168_17589431.0(modencode)	chr2L:17589168-17589431	0.0124438	0.0437231	-2.69331	-1.74024
Gadd45-RA(modencode)	chr2R:3136668-3138160	0.00238737	0.0263073	-2.59379	-0.538069
Fmo-1-RA(modencode)	chr2R:19850382-19852175	0.0159057	0.0435613	-2.478	-1.31382
nc_23300.a(modencode)	chrX:11938177-12009871	0.0241703	0.109994	-2.39754	-1.25242
l(1)G0196-IP14878_l(1)G0196-IP14878(modencode)	chrX:21907028-21909502	0.0829904	0.0114535	-2.25536	-2.0832
Mis12-RA(modencode)	chr3L:6961132-6962142	0.0147347	0.029133	-2.06692	-1.70212
CG6836-RA(modencode)	chr3L:18943686-18948509	0.0090465	0.0659324	-2.04391	-0.388061
CG6836.a(modencode)	chr3L:18943543-18948509	0.00904457	0.0680531	-2.04341	-0.387435
CG6836.b(modencode)	chr3L:18943598-18948509	0.00904457	0.0659271	-2.04341	-0.388058
chrX_3462354_3463298.0(modencode)	chrX:3462354-3463298	6.40486e-05	0.10931	-1.99922	-0.687593
CG31860-IP13286(modencode)	chr2L:12164241-12166710	0.0122008	0.13437	-1.98559	-0.701221
CG31860-RA(modencode)	chr2L:12164241-12166723	0.0122636	0.134519	-1.98454	-0.700481
snoRNA:Psi18S-1377d-RA(modencode)	chr3R:26032878-26033013	0.00675475	0.158529	-1.79738	-1.0784
CG34303-RA(modencode)	chr3R:5976875-5977419	0.000922063	0.0201467	-1.77353	-3.83003
Tapdelta-RA(modencode)	chr2R:7257752-7258859	0.00986109	0.15778	-1.76859	-0.385546
CG33322-RA(modencode)	chr2L:20814315-20816287	0.0207727	0.0414138	-1.75978	-4.58868
CG9272-RA(modencode)	chr2L:20926305-20927907	0.0039061	0.0475059	-1.68152	-0.684443
CG6108-RA(modencode)	chr2L:13277376-13281617	0.00338167	0.0299429	-1.65267	-1.18238
chr2RHet_395268_395614.0(modencode)	chr2RHet:395268-395614	0.00429599	0.00485428	-1.64375	-6.48201
StIP-RA(modencode)	chr2R:6533091-6536281	0.00101866	0.00546355	-1.63992	-1.1073
CG33992-RA(modencode)	chr2L:327429-328518	0.00334504	0.123288	-1.63772	-1.02977
CG12818-RA(modencode)	chr3R:6157199-6158456	0.0208089	0.181744	-1.62658	-0.225903
CG6805.a(modencode)	chr2R:12892958-12895109	0.00453906	0.0139225	-1.60781	-2.15478
CG3835-RB(modencode)	chrX:2035461-2039059	0.0378398	0.15045	-1.60373	-0.203281
Cyp12a4-RA(modencode)	chr3R:14960875-14962926	0.0247181	0.0119522	-1.5942	-2.7556
CG3835-RA(modencode)	chrX:2036765-2039059	0.0385988	0.151476	-1.58399	-0.203112
CG6805-RA(modencode)	chr2R:12892876-12895109	0.0044272	0.0126178	-1.58227	-2.09546
CG6805.b(modencode)	chr2R:12892876-12895109	0.0044272	0.0126269	-1.58227	-2.09512
chrU_216396_216935.0(modencode)	chrU:216396-216935	0.0165234	0.056074	-1.57788	-1.80961
CG4847.a(modencode)	chr2R:13399109-13401364	0.0264925	0.021937	-1.56587	-2.08042
CG32368-RA(modencode)	chr3L:7908536-7908954	0.030081	0.12953	-1.52641	-0.704092
CG9747.b(modencode)	chr3R:26011138-26017751	0.0111458	0.0289858	-1.50579	-2.45121
CG40160.l(modencode)	chr3LHet:1568374-1576088	0.00641354	0.0275456	-1.48621	-1.13665
CG40160.o(modencode)	chr3LHet:1568374-1576088	0.00647807	0.0275507	-1.48551	-1.13854
CG9747.a(modencode)	chr3R:26011138-26017227	0.0123191	0.0282305	-1.48419	-2.47354
CG4408-RA(modencode)	chr3R:19187611-19189760	0.097417	0.0601434	-1.48119	-0.701275
CG9747-RA(modencode)	chr3R:26011138-26017039	0.0124418	0.0279184	-1.47386	-2.53083
CG6472.a(modencode)	chr2R:12770334-12772216	0.00562986	0.0932486	-1.46411	-2.04843
CG40160.k(modencode)	chr3LHet:1562077-1576088	0.00590452	0.0281325	-1.46046	-1.09159
chr3L_15093344_15094204.0(modencode)	chr3L:15093344-15094204	0.000482832	0.154911	-1.45816	-0.60252
CG3835-RC(modencode)	chrX:2035729-2038972	0.0362706	0.154607	-1.43454	-0.199558
ligatin.a(modencode)	chr3R:24975609-24977512	0.0291025	0.100954	-1.42633	-0.676735
ligatin-RA(modencode)	chr3R:24975609-24977598	0.029362	0.100683	-1.41799	-0.677935
CG40160.m(modencode), CG40160.n(modencode)	chr3LHet:1562210-1576088	0.00559202	0.0294066	-1.40768	-1.06289
CG2816-RB(modencode)	chr2L:3703558-3704253	0.0452375	0.0551067	-1.38553	-1.43827
CG13282-RA(modencode)	chr2L:16832065-16834118	0.030214	0.0955868	-1.36952	-0.312181
capa-RA(modencode)	chr3R:25738649-25740087	0.00522332	0.14731	-1.3624	-0.347125
CG34326-RA(modencode)	chrX:16926316-16926568	0.00775196	0.0336875	-1.34642	-1.23732
CG6405-RA(modencode)	chr2L:12424888-12426493	0.00944081	0.0132939	-1.33459	-1.51314
CG4847-RA(modencode)	chr2R:13398981-13401471	0.029385	0.0208832	-1.32774	-2.14902
baz.a(modencode)	chrX:17080812-17094068	0.000219452	0.00535746	-1.31814	-2.96034
CG5532-RA(modencode)	chr2R:19640189-19641038	0.043292	0.133777	-1.30969	-0.323056
Cyp6v1-RA(modencode)	chrX:20528793-20532452	0.0310481	0.0531152	-1.30413	-0.521713
CG6472-RA(modencode)	chr2R:12767778-12772216	0.00624662	0.0875198	-1.29633	-2.10581
CHORD-RA(modencode)	chr3R:20011983-20013538	0.0223311	0.183872	-1.27944	-0.254491
se-RA(modencode)	chr3L:8513574-8514596	0.0422205	0.0217258	-1.26348	-1.56269
GC-RB(modencode)	chr3L:1623179-1625733	0.00162548	0.149662	-1.25351	-0.186611
CG4933-RA(modencode)	chr3L:16345065-16346406	0.0499479	0.197998	-1.24735	-0.280398
CG40160.r(modencode)	chr3LHet:1568374-1575372	0.0116046	0.0305744	-1.22886	-1.10725
CG40160.v(modencode)	chr3LHet:1568374-1575372	0.0117528	0.0305802	-1.22781	-1.10916
GC-RA(modencode)	chr3L:1623179-1629298	0.00183469	0.150158	-1.21756	-0.186378
CG40498.a(modencode)	chr2RHet:52811-54276	0.00311994	0.106241	-1.20615	-0.16418
CG40160.s(modencode)	chr3LHet:1562084-1575372	0.0107575	0.0312265	-1.20578	-1.06496
CG40160.p(modencode)	chr3LHet:1562077-1575372	0.0106696	0.0312651	-1.20411	-1.06124
CG13373-RB(modencode)	chrX:370914-372328	0.0244981	0.122967	-1.20309	-0.244126
UbcD4-RA(modencode)	chr3L:9691410-9693581	0.00953805	0.151101	-1.20207	-0.192381
snoRNA:Psi28S-3186-RA(modencode)	chr3R:1423737-1423879	0.0041131	0.0295281	-1.19352	-1.25888
snoRNA:Psi28S-3305b-RA(modencode)	chr3R:24428062-24428211	0.0337853	0.179384	-1.17708	-1.26358
baz.b(modencode)	chrX:17054043-17094068	0.000231603	0.00533413	-1.17169	-2.93024
CG40160.q(modencode)	chr3LHet:1562349-1575372	0.0111414	0.031765	-1.17093	-1.05867
mRpL4-RA(modencode)	chr2L:16328011-16329212	0.00813711	0.0412403	-1.16589	-0.535216
MB6.chr3R.pasa.11566.a(modencode)	chr3R:24063171-24064292	0.031159	0.121775	-1.16083	-0.325365
CG33640-RA(modencode)	chr2L:13527841-13528537	0.00309318	0.0940577	-1.1582	-0.711882
CG6673-RA(modencode)	chr3L:8514507-8516733	0.00994704	0.0217313	-1.1534	-1.12432
CG40160.t(modencode), CG40160.u(modencode)	chr3LHet:1562210-1575372	0.0101297	0.0325601	-1.14736	-1.03234
CG14329-RA(modencode)	chr3R:13435013-13436255	0.0406422	0.0381726	-1.13545	-3.22139
CG14329.a(modencode)	chr3R:13435084-13436255	0.0410491	0.0381988	-1.13093	-3.2212
CG33640.a(modencode)	chr2L:13527841-13528537	0.00284751	0.084939	-1.12043	-0.797059
fbp.c(modencode)	chr2L:19761579-19763552	0.0851593	0.0688814	-1.11714	-0.473359
snmRNA:60Cb-RA(modencode)	chr2R:20073587-20073686	0.0664472	0.0618664	-1.11643	-0.842387
Madm-RA(modencode)	chr3R:1568207-1571872	0.00974619	0.0117469	-1.11151	-1.39078
CG14441-RA(modencode)	chrX:6593879-6611472	0.00430971	0.194626	-1.1094	-0.165437
Irk3-RB(modencode)	chr2L:18711071-18713813	0.0259967	0.0160349	-1.10924	-1.28726
CG4066-RA(modencode)	chr3R:8137075-8138841	0.0347944	0.0770793	-1.1085	-0.884079
Sug.a(modencode)	chr3L:11678897-11681925	0.0050067	0.141186	-1.1061	-0.249245
CG14441.c(modencode)	chrX:6593879-6611466	0.00440627	0.195359	-1.10524	-0.161646
CG13471-RA(modencode)	chr3L:14725688-14726617	0.00566738	0.0685799	-1.10361	-1.43059
Irk3-RA(modencode)	chr2L:18711071-18713816	0.0266367	0.0177397	-1.10309	-1.31184
Irk3.a(modencode)	chr2L:18711071-18713763	0.026663	0.0177398	-1.10224	-1.31184
CG6870-RA(modencode)	chr2L:17591447-17592298	0.0436253	0.0633241	-1.09682	-0.736995
Sug-RC(modencode)	chr3L:11677062-11681925	0.0047293	0.138016	-1.09596	-0.252693
CG7394-RB(modencode)	chr3L:11555837-11556946	0.00911169	0.0404577	-1.09578	-0.558902
Sug-RD(modencode)	chr3L:11677084-11681925	0.00472017	0.136551	-1.09566	-0.254629
Dhpr-RB(modencode)	chr3L:9127867-9128856	0.0167325	0.0373207	-1.09402	-0.56041
CG7394-RA(modencode)	chr3L:11555738-11556943	0.00927242	0.0401599	-1.09264	-0.560624
Cpr97Eb.a(modencode)	chr3R:22915417-22916462	0.0351339	0.197823	-1.09229	-1.82828
CG4367.a(modencode)	chr3R:16129347-16130694	0.0370077	0.14259	-1.09058	-0.241785
CG3225.a(modencode)	chr2L:4815613-4818225	0.0171734	0.0328311	-1.08938	-0.265701
CG3225.b(modencode)	chr2L:4815613-4820254	0.0165132	0.0237856	-1.08879	-0.282435
l(2)tid-RC_l(2)tid-RC(modencode)	chr2R:19594385-19596758	0.00414259	0.187089	-1.08604	-0.113031
l(2)tid.a_l(2)tid.a(modencode)	chr2R:19594385-19596758	0.00414259	0.187077	-1.08603	-0.113038
CG3835.b(modencode)	chrX:2029860-2039050	0.0441058	0.149979	-1.0847	-0.204186
l(2)tid-RB_l(2)tid-RB(modencode)	chr2R:19594385-19596758	0.00410716	0.184409	-1.08341	-0.113906
l(2)tid-RA_l(2)tid-RA(modencode)	chr2R:19594385-19596758	0.00411013	0.184411	-1.08339	-0.113909
Dhpr.a(modencode), Dhpr-RC(modencode)	chr3L:9127635-9128856	0.0166301	0.0370365	-1.08335	-0.562222
CG40160.g(modencode)	chr3LHet:1562377-1572556	0.0341395	0.0307684	-1.08195	-1.11869
CG34188-RA(modencode)	chr2R:11314579-11315727	0.00748958	0.0669464	-1.08116	-2.00558
snoRNA:Or-CD9b-RA(modencode)	chr2R:20073585-20073675	0.0632509	0.0577049	-1.07878	-0.828774
IM2-RA(modencode)	chr2R:14274006-14274539	0.154256	0.0298634	-1.07862	-3.00306
snoRNA:660-RA(modencode)	chr2R:16833475-16833570	0.170922	0.115667	-1.07823	-0.653258
CG4278-RA(modencode)	chr2L:16327071-16328131	0.0151417	0.0852655	-1.07012	-0.462536
spir.a(modencode)	chr2L:20311226-20344969	0.000632076	0.0105975	-1.06824	-0.953829
spir-SD10157(modencode)	chr2L:20311235-20344969	0.000632076	0.0105972	-1.06824	-0.953832
S1P-RA(modencode)	chr3L:21606881-21610475	0.000894781	0.013232	-1.06733	-0.852249
spir-RD(modencode)	chr2L:20311219-20344999	0.000630503	0.0106707	-1.067	-0.953218
CG3835.a(modencode)	chrX:2029860-2038972	0.0429644	0.15326	-1.05667	-0.201893
CG11400-RA(modencode)	chr2R:13021662-13022350	0.138774	0.0454207	-1.05022	-0.361809
CG31743-RA(modencode), CG34313-RA(modencode)	chr2L:16879517-16886323	0.0201585	0.0420403	-1.04969	-0.71992
Gpdh-RB(modencode)	chr2L:5943665-5948351	0.00874952	0.0126665	-1.04906	-0.936419
CG6125-RB(modencode)	chr3R:11228253-11232905	0.0304186	0.100825	-1.04482	-0.737593
CG6125.a(modencode)	chr3R:11228253-11232844	0.030954	0.0995862	-1.043	-0.749777
CG40498.b(modencode)	chr2RHet:52811-78133	0.00256842	0.106634	-1.0372	-0.162825
CG40160.e(modencode)	chr3LHet:1562357-1572556	0.035075	0.0305775	-1.03416	-1.11789
CG34188-IP17949(modencode)	chr2R:11314596-11315476	0.00482796	0.0693548	-1.03366	-1.90686
CG40160.b(modencode)	chr3LHet:1562175-1572556	0.0332458	0.0306731	-1.03248	-1.11108
chrX_1539850_1540090.0(modencode)	chrX:1539850-1540090	0.064367	0.162618	-1.02695	-0.953715
CG40160.j(modencode)	chr3LHet:1568374-1572855	0.0301739	0.0312259	-1.02231	-1.10209
CG6125-RA(modencode)	chr3R:11228253-11231278	0.0376841	0.0995741	-1.02195	-0.751119
CG6125.b(modencode)	chr3R:11228253-11231227	0.0376888	0.099574	-1.02192	-0.751111
CG40160.f(modencode)	chr3LHet:1562337-1572556	0.0364944	0.0306816	-1.02074	-1.11813
CG40160.d(modencode)	chr3LHet:1569524-1572556	0.0479651	0.0321863	-1.01276	-1.07505
mir-281aS-RA(modencode)	chr2R:8057932-8057953	0.0590633	0.0465776	-1.01211	-2.033
nc_21767.a(modencode)	chrX:3608758-3613464	0.00472702	0.00262176	-1.00909	-1.8711
Act57B-RA(modencode)	chr2R:16831449-16834020	0.138226	0.024174	-1.00741	-0.704909
MIP09619(modencode)	chr3R:9797455-9798038	0.00694791	0.0590144	-1.00515	-2.14692
CG40160-RF(modencode)	chr3LHet:1568374-1572589	0.0326331	0.0313288	-0.999004	-1.10513
Gpdh.b(modencode)	chr2L:5943668-5947629	0.010202	0.0168815	-0.998797	-1.24554
CG40160-RD(modencode)	chr3LHet:1568374-1572652	0.0322831	0.0313236	-0.998241	-1.10319
Tom34-RA(modencode)	chr3R:3859027-3862434	0.0358574	0.00869419	-0.996583	-1.63997
MRP.a(modencode)	chr2L:12722277-12729999	0.00697402	0.0581536	-0.994645	-0.583185
CG40160.i(modencode)	chr3LHet:1562077-1572855	0.0274129	0.0319288	-0.992187	-1.05522
Gpdh.c(modencode)	chr2L:5943668-5947625	0.010582	0.024882	-0.988221	-1.39129
Gpdh-RA(modencode)	chr2L:5943665-5947640	0.0105549	0.0248419	-0.987618	-1.39169
CG40160-RA(modencode)	chr3LHet:1568489-1572556	0.0364473	0.0307705	-0.986846	-1.11886
phyl-RA(modencode)	chr2R:10314826-10319899	0.0106947	0.0316665	-0.981902	-0.98717
Adh-RE(modencode)	chr2L:14616269-14617419	0.032285	0.0610412	-0.975447	-0.78318
CG42487-RA(modencode)	chr3R:23783877-23784897	0.0156234	0.0185422	-0.969556	-1.12958
Adh-RC(modencode)	chr2L:14615555-14617419	0.0257478	0.061024	-0.96934	-0.782351
CG40160.a(modencode)	chr3LHet:1562077-1572652	0.029016	0.0320302	-0.968257	-1.05624
CG3225-RA(modencode)	chr2L:4815519-4818244	0.0320211	0.199068	-0.957408	-0.111914
noe-RC(modencode)	chr3L:17393447-17394448	0.0611625	0.0122018	-0.954289	-1.49588
noe-RB(modencode)	chr3L:17393546-17394448	0.0629561	0.012702	-0.950831	-1.49053
CG7394.a(modencode)	chr3L:11555738-11557452	0.0102934	0.0314224	-0.950317	-0.64421
ana1-RB(modencode)	chr3R:20357591-20362142	0.00973645	0.0206634	-0.949863	-0.826447
LP05425(modencode)	chrX:3439895-3440133	0.117333	0.0293791	-0.94906	-0.614369
CG12433-IP10632(modencode)	chrX:16916337-16917403	0.0419777	0.177295	-0.947241	-0.466171
CG12433-RB(modencode)	chrX:16916337-16917403	0.0419777	0.177295	-0.947241	-0.466171
rl.e(modencode)	chr2RHet:198651-251871	0.0119814	0.197705	-0.945612	-0.16824
CG7394.b(modencode)	chr3L:11555456-11557452	0.0104745	0.0312187	-0.942201	-0.643075
Adh-RH(modencode), Adhr-RB(modencode)	chr2L:14616269-14618902	0.0314211	0.0610426	-0.939049	-0.779867
CG9536.a(modencode)	chr2L:6474349-6477082	0.0125785	0.0803377	-0.937364	-0.199917
CG9536-RA(modencode)	chr2L:6474349-6477082	0.0125786	0.078606	-0.937353	-0.201571
Adhr-RA(modencode), Adh-RF(modencode)	chr2L:14615555-14618902	0.025309	0.0610259	-0.934924	-0.779046
robo3-RA(modencode)	chr2L:1256309-1294722	0.00487754	0.121329	-0.931248	-0.437362
CG31627-RB(modencode)	chr2L:21173225-21174179	0.00364139	0.0562984	-0.924534	-0.540039
Pms2-RA(modencode)	chr2R:11255577-11259118	0.00310086	0.00943561	-0.922878	-1.56737
Pms2.a(modencode)	chr2R:11255577-11259021	0.00304642	0.009418	-0.92252	-1.56427
CG17361-RA(modencode)	chr3L:13990293-13991160	0.0210082	0.0829283	-0.917333	-0.566519
ana1-IP16240(modencode)	chr3R:20356400-20362117	0.0130068	0.0271154	-0.916975	-0.820557
CG31526-RA(modencode)	chr3R:358836-359666	0.00556041	0.145693	-0.916691	-1.80099
CG31526.a(modencode)	chr3R:358836-359666	0.00556059	0.14568	-0.916686	-1.80117
CG10584-RA(modencode)	chr3L:21023380-21024460	0.00228268	0.13786	-0.916617	-0.127791
Gpdh.d(modencode)	chr2L:5943665-5948574	0.00960476	0.00809115	-0.912505	-0.813594
ana1-RA(modencode)	chr3R:20356298-20362142	0.0133632	0.0230555	-0.911048	-0.805184
ana1.a(modencode)	chr3R:20356298-20362142	0.0133638	0.0230498	-0.911023	-0.805186
CG40160.c(modencode)	chr3LHet:1562349-1572556	0.0311686	0.0325327	-0.90914	-1.05364
spir-MIP18615(modencode)	chr2L:20311540-20347479	0.000245175	0.064228	-0.908791	-0.300334
Cpr49Ag-RA(modencode)	chr2R:8295178-8296067	0.0843046	0.0496692	-0.907286	-1.12127
CG14441.e(modencode)	chrX:6593879-6611685	0.00474944	0.114894	-0.89883	-0.200611
Gpdh-RC(modencode)	chr2L:5943665-5949092	0.0103846	0.0146922	-0.894962	-0.779347
CG18107-RA(modencode)	chr2R:14272070-14272416	0.174355	0.135307	-0.894195	-1.21776
CG40160.h(modencode), CG40160-RE(modencode)	chr3LHet:1562210-1572556	0.0265625	0.0333291	-0.890799	-1.0268
Pkc53E.b(modencode)	chr2R:12812016-12830668	0.00116716	0.00944696	-0.886766	-0.52183
CG4884-RA(modencode)	chr3R:23783138-23783974	0.0391301	0.0535956	-0.886568	-0.984293
Pkc53E.c(modencode)	chr2R:12812116-12830668	0.00116773	0.00942497	-0.886565	-0.521888
CG13373-RA(modencode)	chrX:371554-372227	0.0120623	0.192659	-0.886207	-0.247283
tefu.a(modencode)	chr3R:11064882-11067958	0.0037059	0.072629	-0.885914	-0.931488
spir-RE(modencode)	chr2L:20311222-20348387	0.00114213	0.055227	-0.884754	-0.407772
spir-RB(modencode)	chr2L:20311219-20348386	0.00114213	0.0551817	-0.884754	-0.407787
tsl.a(modencode)	chr3R:17603836-17608266	0.05566	0.11653	-0.883892	-0.449451
whip-RA(modencode)	chr2R:4249855-4250723	0.0821992	0.0474065	-0.882865	-3.43101
Prx2540-1-RA(modencode)	chr2R:6311941-6312982	0.12821	0.0503847	-0.882297	-0.847479
Nopp140.a(modencode)	chr3L:21825845-21829787	0.0190195	0.0505301	-0.882142	-0.785948
Nopp140.b(modencode)	chr3L:21825845-21829787	0.0190195	0.0506687	-0.882125	-0.785672
fbp-RB(modencode)	chr2L:19761528-19764153	0.132819	0.068833	-0.881021	-0.472944
tsl-RB(modencode)	chr3R:17603770-17608292	0.0593887	0.116406	-0.879406	-0.449521
CG42345.e(modencode)	chr2R:1303857-1341811	0.00939025	0.00862618	-0.87915	-1.64208
CG42345.g(modencode)	chr2R:1303857-1341626	0.00939128	0.00928866	-0.879149	-1.64784
nc_3109.a(modencode)	chr2L:14615274-14618753	0.0520808	0.144237	-0.878887	-0.367852
spir-RA(modencode)	chr2L:20311219-20348383	0.00112333	0.0549337	-0.878592	-0.408081
sick.a(modencode)	chr2L:19866441-19926689	0.0306225	0.0227841	-0.877321	-1.70015
rn.m(modencode)	chr3R:3098973-3128031	0.0160397	0.115216	-0.876727	-0.182798
vfl.c(modencode)	chrX:19663029-19676718	0.0184962	0.141963	-0.876234	-0.380271
Nopp140-RB(modencode)	chr3L:21825766-21829836	0.0195884	0.0748494	-0.872047	-0.659213
CG42345.a(modencode)	chr2R:1303857-1341379	0.00926806	0.00991011	-0.871826	-1.69006
rn.i(modencode)	chr3R:3098854-3128031	0.0157887	0.107877	-0.867657	-0.269208
Gpdh.a(modencode)	chr2L:5943665-5949092	0.0102914	0.0151366	-0.867392	-0.792109
Pli-GM07040(modencode)	chr3R:19692213-19695748	0.00842143	0.0113372	-0.864832	-1.08456
Pkc53E.g(modencode)	chr2R:12812016-12830982	0.00168848	0.00907358	-0.85855	-0.551829
Pkc53E.h(modencode)	chr2R:12812116-12830982	0.00169464	0.00903795	-0.858345	-0.551884
CG42345.b(modencode)	chr2R:1301518-1335479	0.0151963	0.0349044	-0.85726	-1.92709
rn.d(modencode)	chr3R:3099142-3135381	0.0168421	0.19649	-0.856872	-0.109186
rn.f(modencode)	chr3R:3099139-3135381	0.0167715	0.196452	-0.856865	-0.109214
rn.c(modencode)	chr3R:3098813-3128031	0.0162522	0.100834	-0.856192	-0.291572
CG1962-RB(modencode)	chr2L:20678921-20681618	0.0301527	0.112524	-0.855168	-0.202188
tefu.b(modencode)	chr3R:11057732-11067923	0.00274025	0.109283	-0.854569	-0.361084
tefu-RB(modencode)	chr3R:11057920-11068031	0.00256345	0.111432	-0.853811	-0.358693
CG1962.a(modencode)	chr2L:20678824-20681995	0.0303342	0.0753272	-0.85215	-0.256229
CG1962-RA(modencode)	chr2L:20678824-20681995	0.0302615	0.0554446	-0.851546	-0.278032
vfl.b(modencode)	chrX:19663153-19676629	0.0389012	0.137821	-0.851208	-0.418762
CG32792.a(modencode)	chrX:3451845-3466033	0.00645085	0.106691	-0.849513	-0.251975
CG15210-RA(modencode)	chrX:10733068-10734011	0.167262	0.0089448	-0.847855	-1.8976
CG42345-RF(modencode)	chr2R:1303857-1335479	0.00902307	0.0311963	-0.847527	-1.93055
CG32792-RF(modencode)	chrX:3451845-3466033	0.0067366	0.105654	-0.846047	-0.249584
sPLA2-RB(modencode)	chr2R:3330550-3331332	0.0621455	0.0548633	-0.845018	-0.288608
rn.l(modencode)	chr3R:3098299-3128031	0.0107539	0.150136	-0.840755	-0.113174
Dgk-IP06426(modencode)	chr2R:3741541-3773487	0.0369208	0.0317496	-0.83505	-1.42885
rn.b(modencode)	chr3R:3098813-3135381	0.0162545	0.102442	-0.834507	-0.291999
CG32251-RA(modencode)	chr3L:4313483-4318612	0.0348989	0.0725342	-0.833705	-1.13138
Madm.b(modencode)	chr3R:1568207-1572614	0.00978487	0.0121389	-0.825451	-1.65922
Pkc53E.a(modencode)	chr2R:12809174-12830668	0.00251818	0.00937121	-0.823415	-0.521293
rn.k(modencode)	chr3R:3098299-3135381	0.0106457	0.15249	-0.820487	-0.11322
CG8866-RA(modencode)	chr3R:5157699-5160519	0.013501	0.0573444	-0.81792	-0.429904
CG40191.e(modencode)	chr2RHet:390799-393537	0.00399466	0.0691963	-0.817545	-0.325415
tsl-RA(modencode)	chr3R:17603770-17608266	0.0721766	0.115686	-0.817527	-0.45213
CG3600-RB(modencode)	chrX:1836701-1888227	0.14943	0.068752	-0.817124	-0.870362
CG40191-RD(modencode)	chr2RHet:390799-393073	0.00462429	0.055547	-0.816295	-0.334108
psq.y(modencode)	chr2R:6470998-6504785	0.00878569	0.174625	-0.814467	-0.230756
nc_11074.a(modencode)	chr3L:7243740-7245698	0.0193638	0.0859232	-0.813704	-0.552901
CG13375-RA(modencode)	chrX:180219-189034	0.0286082	0.189018	-0.813689	-0.313126
psq.s(modencode)	chr2R:6471375-6504785	0.00884432	0.175219	-0.813178	-0.230266
psq.r(modencode)	chr2R:6471469-6504785	0.00884819	0.175322	-0.812666	-0.229863
psq.t(modencode)	chr2R:6471179-6504786	0.00884754	0.17669	-0.811921	-0.229087
psq.q(modencode)	chr2R:6471179-6504785	0.0088596	0.176436	-0.811201	-0.228922
CG4884-MIP05919(modencode)	chr3R:23783106-23784307	0.0259626	0.0501952	-0.80903	-0.973184
spaw-RA(modencode)	chr2R:4246453-4248695	0.0106501	0.0889417	-0.807723	-0.858703
CG9902.d(modencode)	chrX:16436855-16441570	0.00060441	0.0231473	-0.807554	-0.538827
psq.v(modencode)	chr2R:6456461-6504785	0.00787275	0.174029	-0.805364	-0.231175
fbp-RA(modencode)	chr2L:19761528-19764244	0.154994	0.0687361	-0.804325	-0.477599
Pkc53E-RA(modencode)	chr2R:12812632-12830668	0.00259312	0.00975238	-0.804257	-0.53732
fbp.b(modencode)	chr2L:19761528-19764244	0.155506	0.0687369	-0.803484	-0.477597
Madm.a(modencode)	chr3R:1568207-1572745	0.00980432	0.0122262	-0.803429	-1.64656
ire-1.b(modencode)	chr3R:15679627-15687156	0.019801	0.0429361	-0.80335	-0.251996
Adh-RI(modencode)	chr2L:14615555-14617419	0.0359435	0.0612788	-0.803168	-0.778816
psq.w(modencode)	chr2R:6456464-6504785	0.0076678	0.174446	-0.802881	-0.230985
hubl-FI11533(modencode)	chr2R:4246971-4249644	0.00840795	0.118769	-0.802472	-0.78964
CG34051-RA(modencode)	chr2L:19960069-19961048	0.0166587	0.00876988	-0.802255	-2.10391
CG34051.a(modencode)	chr2L:19960069-19961048	0.0166627	0.00876999	-0.80221	-2.10392
CG13375.a(modencode)	chrX:179960-189007	0.028895	0.114653	-0.800944	-0.385523
Pkc53E.e(modencode)	chr2R:12809174-12830982	0.00338167	0.0089054	-0.797027	-0.551438
nc_22394.a(modencode)	chrX:7344721-7345684	0.0274758	0.100635	-0.796194	-0.458361
vfl-RA(modencode)	chrX:19670020-19676629	0.0345669	0.136269	-0.796102	-0.424295
CG15067.a(modencode)	chr2R:14272142-14273148	0.17844	0.0299179	-0.79587	-1.78504
sPLA2-RA(modencode)	chr2R:3330437-3331333	0.0678576	0.0501353	-0.795182	-0.292876
fbp.a(modencode)	chr2L:19761579-19764138	0.15651	0.0609916	-0.793665	-0.483265
ssp4.p(modencode)	chr2R:13407073-13410076	0.0674717	0.109382	-0.79338	-0.22693
CG40191.f(modencode)	chr2RHet:391020-393233	0.00461231	0.0720059	-0.791988	-0.31195
psq.x(modencode)	chr2R:6456689-6504785	0.00948216	0.174543	-0.790766	-0.230791
CG40191-MIP17132(modencode)	chr2RHet:391671-392982	0.00440364	0.0402177	-0.789229	-0.419226
CG15005.a(modencode)	chr3L:4200820-4203379	0.0522494	0.112043	-0.788516	-0.525938
psq.k(modencode)	chr2R:6456684-6504785	0.00957607	0.172779	-0.786391	-0.233777
CG40191-RA(modencode)	chr2RHet:391006-393073	0.00493943	0.0539089	-0.783249	-0.346168
CG12640-RA(modencode)	chrX:10326498-10326845	0.0755025	0.0384351	-0.78217	-1.48514
CG9902-RA(modencode)	chrX:16437544-16441586	0.000703267	0.0432664	-0.779654	-0.802692
Pkc53E.f(modencode)	chr2R:12812632-12830982	0.00344638	0.00916096	-0.779413	-0.565148
CG40191-RB(modencode)	chr2RHet:391020-393037	0.00467158	0.0546721	-0.775881	-0.341677
CG40191.a(modencode)	chr2RHet:390935-392988	0.00515968	0.0555605	-0.774978	-0.339571
CG40191.b(modencode)	chr2RHet:390903-392988	0.00515762	0.0555605	-0.774742	-0.339571
CG42249.c(modencode)	chrX:10990825-11002192	0.0222584	0.0800453	-0.774125	-0.999617
CG18467.a(modencode)	chr2R:13328081-13329994	0.032817	0.102386	-0.774101	-0.416749
CG18467-RA(modencode)	chr2R:13328085-13329994	0.0328174	0.102386	-0.77409	-0.416747
CG15005-RA(modencode)	chr3L:4200820-4204421	0.0548724	0.127786	-0.770984	-0.503331
rn.a(modencode)	chr3R:3098813-3103201	0.0209821	0.108306	-0.770714	-0.275778
CG13248.a(modencode)	chr3L:20399594-20403673	0.0102185	0.0970849	-0.77006	-0.27092
CG9906-RA(modencode)	chrX:16417335-16419254	0.0313033	0.121547	-0.769493	-0.850907
CG2767-RA(modencode)	chr3R:3831646-3833890	0.0769428	0.18414	-0.767999	-0.118877
CG2767-RB(modencode)	chr3R:3831646-3833881	0.0768696	0.184124	-0.767706	-0.119101
psq.aa(modencode)	chr2R:6445382-6504265	0.00671957	0.15697	-0.766902	-0.0899673
Pkc53E-RC(modencode)	chr2R:12812459-12830617	0.00334504	0.0114673	-0.766775	-0.555415
CG31036-RA(modencode)	chr3R:25733801-25738687	0.0151427	0.0748178	-0.766768	-0.619368
nc_18757.a(modencode)	chr3R:19893401-19927197	0.0103019	0.0326556	-0.76581	-0.489942
CG14830-RA(modencode)	chr3L:7243800-7257045	0.0277173	0.0509583	-0.764719	-0.5774
CG14830.a(modencode)	chr3L:7243800-7257045	0.0277177	0.050956	-0.764713	-0.577404
rl-RE73195(modencode)	chr2RHet:198737-207864	0.0428408	0.0868422	-0.764454	-0.417276
MTA1-like.b(modencode)	chr3R:1464406-1474588	0.0443633	0.105393	-0.764229	-0.262944
MTA1-like-RB(modencode)	chr3R:1464406-1474591	0.0443632	0.105393	-0.764228	-0.262944
MTA1-like-RA(modencode)	chr3R:1464406-1474591	0.0442896	0.105299	-0.763577	-0.264493
MTA1-like.a(modencode)	chr3R:1464406-1474588	0.0442897	0.105299	-0.763576	-0.264499
CG18467.b(modencode)	chr2R:13327591-13329994	0.0340423	0.102554	-0.763561	-0.414634
CG18467.c(modencode)	chr2R:13327591-13329994	0.0340437	0.102554	-0.763532	-0.414635
psq.o(modencode)	chr2R:6445323-6504286	0.0067443	0.156793	-0.763068	-0.0926558
Pkc53E-RB(modencode)	chr2R:12812449-12830668	0.00336511	0.0100729	-0.761934	-0.514359
rl-RA(modencode)	chr2RHet:198651-207618	0.0436988	0.0708511	-0.760915	-0.475975
rn.j(modencode)	chr3R:3098299-3103201	0.0132645	0.156303	-0.760318	-0.108164
CG42345-RA(modencode)	chr2R:1301166-1335575	0.0139309	0.0350831	-0.758152	-1.85791
CG42345.c(modencode)	chr2R:1300957-1335479	0.014522	0.0346616	-0.757716	-1.88565
MTA1-like-RC(modencode)	chr3R:1464600-1473740	0.0433971	0.157798	-0.755568	-0.256487
MTA1-like.c(modencode)	chr3R:1464600-1473665	0.0436693	0.157567	-0.755535	-0.256416
psq.u(modencode)	chr2R:6445382-6504785	0.00721406	0.182727	-0.753586	-0.203804
Oli-RA(modencode)	chr2L:17590008-17591318	0.0509883	0.191344	-0.752655	-0.270462
SP71.e(modencode)	chrX:84523-96221	0.00825105	0.011147	-0.752439	-1.55281
Mur11Da-RC(modencode)	chrX:12861942-12863649	0.184146	0.162122	-0.751811	-0.531258
psq.p(modencode)	chr2R:6445383-6504786	0.00723165	0.1833	-0.750048	-0.202838
psq.j(modencode)	chr2R:6445323-6504785	0.00723499	0.182941	-0.749979	-0.202825
psq.z(modencode)	chr2R:6456732-6504785	0.0102264	0.174665	-0.749248	-0.230778
SP71.ae(modencode)	chrX:84523-97520	0.0094081	0.0113076	-0.748874	-1.67109
CG13375.c(modencode)	chrX:179180-189007	0.0194243	0.0582445	-0.747687	-0.433167
SP71.z(modencode)	chrX:84523-96716	0.00879512	0.0115618	-0.74754	-1.66587
psq.l(modencode)	chr2R:6456732-6504785	0.0102795	0.173036	-0.747188	-0.233753
Dystrophin-RG(modencode)	chr3R:15302591-15421117	0.00969049	0.0330298	-0.747037	-0.548391
CG42260.an(modencode)	chr2R:18631179-18684628	0.0776203	0.181925	-0.746921	-0.457258
SP71.t(modencode)	chrX:84523-96504	0.00875076	0.0127537	-0.746903	-1.65952
CG13375.b(modencode)	chrX:179180-189007	0.0195386	0.0571468	-0.746887	-0.435415
SelG-RA(modencode)	chrX:11781313-11782277	0.037312	0.0524985	-0.744213	-0.353584
GH03581(modencode)	chrX:11781313-11782273	0.0373124	0.0524989	-0.744208	-0.353584
SP71.l(modencode)	chrX:84523-97207	0.00908517	0.0112487	-0.743722	-1.67022
SP71.v(modencode)	chrX:84523-97879	0.00986065	0.0113836	-0.743251	-1.6602
CG34415-MIP10780(modencode)	chr2R:12841578-12842770	0.00909778	0.0158465	-0.741662	-1.53947
nc_6835.b(modencode)	chr2R:10510725-10512003	0.0298144	0.0319451	-0.741211	-0.618417
Dystrophin-RF(modencode)	chr3R:15286779-15421148	0.00980717	0.0337427	-0.73945	-0.546476
agt-RA(modencode)	chr3R:2485130-2485822	0.0604491	0.117464	-0.737913	-0.377203
CG5645-RA(modencode)	chr3L:12126867-12129861	0.00933991	0.13171	-0.73505	-0.249805
DmsR-1-RA(modencode)	chr3L:2322680-2345799	0.0302839	0.0831655	-0.729995	-0.518741
CG13999-RA(modencode)	chr2L:5955260-5956513	0.0927781	0.0663568	-0.727062	-0.273579
SP71.d(modencode)	chrX:72458-96056	0.00852832	0.0141187	-0.725793	-1.47321
ics-MIP12770(modencode)	chr2L:13639525-13642361	0.0372158	0.00776651	-0.723998	-1.15344
ics-RA(modencode)	chr2L:13639442-13641303	0.0377039	0.00685811	-0.720812	-1.16008
rl.j(modencode)	chr2RHet:198651-247874	0.0242557	0.190603	-0.720188	-0.110221
SP71.ab(modencode)	chrX:72402-97520	0.0102993	0.0113078	-0.719986	-1.67109
CG32512-RA(modencode)	chrX:20933312-20938771	0.0831591	0.107547	-0.71942	-1.42976
SP71.p(modencode)	chrX:39793-96450	0.0103364	0.0121924	-0.71906	-1.63317
SP71.x(modencode)	chrX:72402-96716	0.00973885	0.0115615	-0.718352	-1.66586
SP71.r(modencode)	chrX:72402-96504	0.00970427	0.0127538	-0.717784	-1.65951
SP71.w(modencode)	chrX:39793-96870	0.010277	0.0109223	-0.717724	-1.64474
SP71.u(modencode)	chrX:72402-97879	0.0108746	0.0113834	-0.715071	-1.66021
SP71.k(modencode)	chrX:72402-97207	0.0100467	0.0112492	-0.715049	-1.67021
Dystrophin.e(modencode)	chr3R:15394934-15421114	0.00155287	0.0368615	-0.714495	-0.575071
vfl.i(modencode)	chrX:19662727-19676629	0.0327848	0.113487	-0.714437	-0.476853
CG42345-RD(modencode)	chr2R:1301241-1341811	0.0298022	0.0256066	-0.714415	-1.30575
Dystrophin-RE(modencode)	chr3R:15394934-15421114	0.00146225	0.0367143	-0.7144	-0.575662
CG5357-RA(modencode)	chr2R:19343498-19346133	0.111516	0.0689953	-0.713684	-1.11053
CG1958-RA(modencode)	chrX:7160937-7161914	0.0707835	0.162481	-0.712182	-0.480753
CG1311.b(modencode)	chr3L:4278477-4281618	0.0579739	0.036118	-0.71188	-0.665187
CG13526-AT13807(modencode)	chr2R:18642787-18643401	0.126017	0.0289104	-0.711505	-2.9174
CG15096-RB(modencode)	chr2R:14695812-14699048	0.179925	0.0300071	-0.71039	-1.51403
Dystrophin.c(modencode)	chr3R:15394925-15421114	0.00189438	0.0368587	-0.710084	-0.575075
SP71.c(modencode)	chrX:39793-96056	0.00857188	0.0140311	-0.70879	-1.42725
SP71.a(modencode)	chrX:72402-96056	0.00881983	0.0141198	-0.708342	-1.47322
chr3L_15091617_15091865.0(modencode)	chr3L:15091617-15091865	0.028427	0.171574	-0.706027	-0.224018
Dystrophin.g(modencode)	chr3R:15395371-15421114	0.00210116	0.0369647	-0.705936	-0.574246
Ir62a-RA(modencode)	chr3L:1529439-1531259	0.150492	0.172433	-0.705912	-0.670843
Dystrophin.h(modencode)	chr3R:15395455-15421114	0.00213738	0.036709	-0.705305	-0.575097
Dystrophin.i(modencode)	chr3R:15395461-15421114	0.00213738	0.036709	-0.705305	-0.575097
CG42345-RE(modencode)	chr2R:1301241-1342518	0.0269881	0.0253139	-0.705242	-1.4118
Dystrophin.f(modencode)	chr3R:15395192-15421114	0.00184574	0.036722	-0.704921	-0.574682
SP71.ac(modencode)	chrX:72386-97520	0.0100343	0.0113882	-0.70469	-1.67283
SP71.ad(modencode)	chrX:72419-97520	0.0101768	0.0113881	-0.704651	-1.67281
SP71.aa(modencode)	chrX:72402-97520	0.0103381	0.0113879	-0.704508	-1.67281
SP71.y(modencode)	chrX:72419-96716	0.0095986	0.011663	-0.702836	-1.66765
SP71.m(modencode)	chrX:72402-96732	0.0097317	0.0116626	-0.702705	-1.66764
SP71.o(modencode)	chrX:72386-96514	0.00947986	0.0128854	-0.702313	-1.65736
SP71.s(modencode)	chrX:72419-96504	0.00956022	0.0128802	-0.702292	-1.66135
SP71.q(modencode)	chrX:72402-96514	0.009694	0.0128859	-0.702162	-1.65735
CG31352.a(modencode)	chr3R:5520234-5525638	0.00878466	0.140624	-0.702133	-0.11739
SP71.n(modencode)	chrX:72386-96870	0.00946209	0.0111483	-0.70199	-1.66937
Dystrophin.d(modencode)	chr3R:15394839-15421210	0.00119108	0.0402692	-0.701721	-0.526797
SP71.i(modencode)	chrX:72386-97879	0.0106199	0.0114615	-0.699925	-1.66192
SP71.j(modencode)	chrX:72419-97879	0.0107575	0.0114615	-0.699868	-1.66196
SP71.h(modencode)	chrX:72402-97879	0.0109553	0.0114621	-0.699761	-1.66194
SP71.g(modencode)	chrX:72386-97207	0.00980099	0.01133	-0.699677	-1.67197
SP71.f(modencode)	chrX:72402-97207	0.0100515	0.0113299	-0.699537	-1.67196
CG9902.a(modencode)	chrX:16435778-16441570	0.000693874	0.0517073	-0.696681	-0.416881
CG6209.a(modencode)	chr2R:9549000-9551103	0.151979	0.197699	-0.692718	-0.8932
CG33797-RA(modencode)	chr4:864173-864430	0.0756581	0.139247	-0.692489	-2.03128
ald.a(modencode)	chr3R:13496999-13499550	0.0593174	0.132871	-0.692182	-0.39664
CG9517-RB(modencode)	chrX:14769403-14776618	0.0923644	0.122262	-0.692154	-0.601159
CG9517-RA(modencode)	chrX:14769403-14776618	0.0923729	0.101311	-0.692138	-0.643541
SP71-RB(modencode)	chrX:72386-96056	0.0085836	0.013794	-0.690893	-1.47784
SP71.b(modencode)	chrX:72419-96056	0.00858699	0.0137961	-0.690854	-1.47783
ald-RA(modencode)	chr3R:13496968-13499550	0.0592188	0.133395	-0.690781	-0.395475
SP71-RA(modencode)	chrX:72402-96124	0.00926884	0.0118742	-0.690756	-1.46438
CG13526-RA(modencode)	chr2R:18642745-18643401	0.119747	0.0289008	-0.68595	-3.10918
Taf1.b(modencode)	chr3R:2473481-2481770	0.0161282	0.132321	-0.685643	-0.145775
Ir51b-RA(modencode)	chr2R:11095498-11097291	0.000653558	0.171034	-0.682326	-0.486805
snoRNA:Psi18S-1377b-RA(modencode)	chr3R:26033215-26033352	0.0963906	0.115502	-0.678609	-0.688929
snoRNA:Me28S-U1848-RA(modencode)	chr2R:10510075-10510154	0.0791734	0.189538	-0.678104	-1.24272
Taf1-RC(modencode)	chr3R:2472524-2481847	0.022503	0.0726328	-0.677678	-0.18652
CG9362-RA(modencode)	chr3R:5281216-5282300	0.00688692	0.0227237	-0.676927	-1.07517
CG31714-GH12004(modencode)	chr2L:10064340-10081603	0.0801053	0.0839519	-0.675022	-0.338534
sick-RC(modencode)	chr2L:19866441-19950600	0.057804	0.0355863	-0.674252	-0.984581
Mbs-RE(modencode)	chr3L:16066467-16072705	0.00175472	0.0244368	-0.673157	-0.402157
CG4393-RB(modencode)	chr3R:19202534-19210716	0.0447169	0.0221198	-0.672823	-1.10227
CG4393.a(modencode)	chr3R:19202526-19210631	0.04485	0.0218493	-0.67276	-1.11118
Taf1-RB(modencode)	chr3R:2472540-2481847	0.0224828	0.0832869	-0.671887	-0.18545
CG15719-RB(modencode)	chrX:12897986-12898889	0.066542	0.133565	-0.671865	-0.43663
CG9548-RA(modencode)	chr2L:6490151-6490894	0.113748	0.105426	-0.669697	-0.527532
CG4686.a(modencode)	chr3R:15690320-15692555	0.11202	0.0280068	-0.669551	-0.696307
Taf1.a(modencode)	chr3R:2472591-2481776	0.0225278	0.126801	-0.669055	-0.15107
sPLA2-RC(modencode)	chr2R:3330437-3331347	0.093473	0.0734948	-0.66742	-0.309206
snoRNA:Psi28S-1153-RA(modencode)	chr2R:9445044-9445191	0.15578	0.0925082	-0.666898	-2.07097
CG5380-RA(modencode)	chr3R:18191802-18192928	0.0824274	0.192014	-0.660023	-0.211859
GstD1-RA(modencode)	chr3R:8193533-8194987	0.179488	0.0190931	-0.65989	-1.04006
GstD1.a(modencode)	chr3R:8193539-8194987	0.179488	0.0191829	-0.659889	-1.04042
CG4661-RA(modencode)	chrX:12749791-12751755	0.00603908	0.159459	-0.659738	-0.325266
Or83a.a(modencode)	chr3R:1223146-1224918	0.0355083	0.104194	-0.658126	-0.168197
ssp4-RC(modencode)	chr2R:13407073-13423006	0.000539433	0.0527067	-0.657204	-0.291113
GstD1-RB(modencode)	chr3R:8193269-8194417	0.179499	0.0192297	-0.655449	-1.03634
CG31714-RB(modencode)	chr2L:10064243-10087884	0.0839123	0.132878	-0.653409	-0.361883
CG8195-RA(modencode)	chr2R:11449982-11453304	0.0431737	0.0640141	-0.653295	-0.370599
CG5955-RA(modencode)	chr3L:20460024-20462702	0.0353691	0.178469	-0.652405	-0.730282
CG31304-RA(modencode)	chr3R:10922776-10927922	0.00228831	0.167607	-0.651418	-0.271495
Acp53C14c-RA(modencode)	chr2R:12638286-12638853	0.0170413	0.129541	-0.650686	-1.25939
Taf1-RA(modencode)	chr3R:2472540-2481847	0.0290348	0.0676368	-0.650475	-0.192144
CG1311.a(modencode)	chr3L:4277964-4281618	0.0770654	0.0364613	-0.650351	-0.662098
CG1311-RA(modencode)	chr3L:4277896-4281618	0.0770646	0.0364622	-0.65035	-0.662094
vfl.f(modencode)	chrX:19662688-19677588	0.0200374	0.18471	-0.648741	-0.261738
CG13532-RA(modencode)	chr2R:18758611-18761956	0.0623755	0.0683237	-0.647975	-0.48316
CG42260.ao(modencode)	chr2R:18631179-18684628	0.0922557	0.174515	-0.646496	-0.472903
CG4686-RA(modencode)	chr3R:15690125-15692666	0.116494	0.0243911	-0.646148	-0.698807
Taf1-RD(modencode)	chr3R:2472524-2481847	0.0290192	0.0782595	-0.644851	-0.190971
CG30115.a(modencode)	chr2R:14441621-14500429	0.0127177	0.0762192	-0.644736	-0.42976
CG9902.b(modencode)	chrX:16436156-16441570	0.00113311	0.195081	-0.644347	-0.192534
MED1-RA(modencode)	chr3L:21621384-21627563	0.0309884	0.0186563	-0.643262	-0.486891
MED1.d(modencode)	chr3L:21621384-21627563	0.0309978	0.018659	-0.643244	-0.486889
ssp4-RF(modencode)	chr2R:13407073-13423006	0.000775834	0.0545722	-0.642676	-0.287753
CG13375.h(modencode)	chrX:178186-189213	0.0400156	0.0160939	-0.642657	-0.595548
p130CAS-RD(modencode)	chr3L:152840-174585	0.0155238	0.00663756	-0.642079	-1.79417
CG30115.e(modencode)	chr2R:14441623-14499594	0.0133571	0.0772328	-0.639767	-0.434229
CG30115-RE(modencode)	chr2R:14441623-14499425	0.0133303	0.0757187	-0.639341	-0.441334
CG13375.f(modencode)	chrX:177893-189007	0.0413729	0.0148126	-0.638897	-0.71028
CG33310-RA(modencode)	chr2L:15026909-15029513	0.0725991	0.0529985	-0.636619	-0.562435
p130CAS-RE(modencode)	chr3L:171686-174585	0.0181202	0.00678431	-0.63654	-1.80356
CG42260.r(modencode)	chr2R:18631179-18684742	0.0981056	0.155648	-0.636162	-0.531821
nc_12806.a(modencode)	chr3L:15886937-15892129	0.0505219	0.166189	-0.635816	-0.795952
CG12901-RA(modencode)	chr2R:6243674-6245243	0.0606989	0.158479	-0.635112	-1.08329
p130CAS-RB(modencode)	chr3L:171739-174517	0.0178715	0.00677797	-0.634871	-1.8048
p130CAS-RF(modencode)	chr3L:171739-174517	0.0178713	0.00677797	-0.63487	-1.8048
CG32809.c(modencode)	chrX:1574060-1586748	0.0904574	0.165236	-0.634801	-0.261797
CG6854-RA(modencode)	chr3L:15098984-15103837	0.0382176	0.154561	-0.634167	-0.277355
chr2R_6247724_6248259.0(modencode)	chr2R:6247724-6248259	0.122495	0.0841925	-0.633515	-1.61515
CG6854.a(modencode)	chr3L:15098984-15103837	0.0392075	0.187131	-0.633176	-0.248172
CG32809-RB(modencode)	chrX:1574060-1586580	0.0909976	0.164702	-0.633014	-0.262207
CG6353.a(modencode)	chr3R:17486908-17488680	0.0238576	0.0618659	-0.632887	-0.471937
CG4644-RA(modencode)	chr2L:1103254-1108453	0.0482528	0.0535095	-0.632279	-0.262694
CG33993-RA(modencode)	chr3L:5926132-5943821	0.0948702	0.025518	-0.630851	-1.62076
nc_13785.a(modencode)	chr3L:20457814-20459141	0.19024	0.0922851	-0.630213	-0.925199
Rassf-RA(modencode)	chr3R:18939658-18943787	0.0418225	0.112664	-0.630187	-0.282067
CG5978-RA(modencode)	chr3L:8615139-8617019	0.0162547	0.0623949	-0.63014	-0.234222
CG15709.a(modencode)	chr2R:12130650-12142821	0.0308738	0.0321979	-0.629411	-0.340533
Cng-RA(modencode)	chr2R:12130650-12137234	0.0301148	0.0373783	-0.62879	-0.340565
CG42260.l(modencode)	chr2R:18630908-18684628	0.0598652	0.176438	-0.627671	-0.464529
CG6353-RA(modencode)	chr3R:17486852-17488756	0.0246995	0.0642921	-0.627556	-0.466944
Dystrophin-RA(modencode)	chr3R:15289255-15421114	0.0121608	0.0337006	-0.626777	-0.547147
CG15168-RA(modencode)	chr2L:18987672-18988374	0.14749	0.18556	-0.626223	-0.264655
noncoding_13785-MIP08568(modencode)	chr3L:20457309-20458776	0.191226	0.0877161	-0.625694	-0.932549
CG14441.b(modencode)	chrX:6593378-6613099	0.0146658	0.0491878	-0.625225	-0.389359
Dystrophin-RH(modencode)	chr3R:15289255-15421117	0.0122071	0.0330661	-0.625077	-0.525527
CG42260.c(modencode)	chr2R:18630908-18684680	0.0618015	0.116671	-0.624933	-0.709596
ca-RA(modencode)	chr3R:25632911-25640872	0.0171481	0.0124989	-0.62448	-0.64072
Drep-4-RA(modencode)	chr2L:13283887-13286604	0.0277813	0.0604637	-0.622986	-0.374621
CG6353.b(modencode)	chr3R:17486908-17488505	0.0259229	0.0584211	-0.62292	-0.488283
CG11152-RA(modencode)	chr4:857610-865428	0.0619207	0.187697	-0.622884	-0.240041
CG6293.a(modencode)	chr3R:6133984-6137334	0.0931508	0.0859519	-0.621648	-0.456349
Dystrophin.o(modencode)	chr3R:15329306-15421210	0.0107347	0.119486	-0.621412	-0.234946
CG5181-RA(modencode)	chr2L:7408517-7409812	0.0369754	0.12499	-0.620891	-0.469374
Dystrophin-RC(modencode)	chr3R:15289254-15421210	0.0113747	0.0383677	-0.620046	-0.504801
MB6.chr2R.pasa.4767.a(modencode)	chr2R:18643670-18646500	0.106251	0.0635823	-0.616209	-1.07788
vfl.g(modencode)	chrX:19662271-19677588	0.0221992	0.175917	-0.615923	-0.267536
CG17490-RD(modencode)	chr2L:22430964-22441190	0.0590949	0.0691677	-0.614271	-0.416177
ssp4-RD(modencode)	chr2R:13406523-13423006	0.000802566	0.060721	-0.614024	-0.214046
ssp4.g(modencode)	chr2R:13406611-13422942	0.000841525	0.0645851	-0.612081	-0.209393
nAcRalpha-30D-RF(modencode)	chr2L:9815099-9886214	0.0325366	0.0216017	-0.61066	-0.746256
Hairless.a(modencode)	chr3R:16447658-16452978	0.0313653	0.00539041	-0.610099	-1.25738
CG15398-RB(modencode)	chr2L:2695314-2696462	0.178996	0.0669636	-0.608695	-2.65606
nc_21270.a(modencode)	chrX:915079-920733	0.0848351	0.117044	-0.608039	-0.781117
nonA-l-RA(modencode)	chr3R:12465929-12468541	0.00919256	0.0246935	-0.607929	-0.195847
CG13139.d(modencode)	chr2L:10364446-10366410	0.0378283	0.05754	-0.607888	-0.675346
CG13139.e(modencode)	chr2L:10364465-10366410	0.0378289	0.0579408	-0.607878	-0.678076
CG13139.c(modencode)	chr2L:10364465-10366410	0.0378283	0.0575404	-0.607869	-0.675341
CG13442-RA(modencode)	chr2R:16615298-16618201	0.102481	0.0518566	-0.607365	-1.57544
CG13375.e(modencode)	chrX:177332-189007	0.0543611	0.0203881	-0.606052	-0.750412
CG14441.d(modencode)	chrX:6593378-6613445	0.0160846	0.0839388	-0.605796	-0.241138
CG13375.d(modencode)	chrX:177332-189007	0.0544681	0.0203623	-0.605362	-0.750833
SuUR-RA(modencode)	chr3L:11058044-11062125	0.0295439	0.099317	-0.604245	-0.207157
CG42260.au(modencode)	chr2R:18630908-18684912	0.0692018	0.101022	-0.602103	-0.782732
CG32177-RA(modencode)	chr3L:17640539-17647376	0.029765	0.129237	-0.600863	-0.156051
Or82a-RA(modencode)	chr3R:82694-84235	0.106379	0.164908	-0.600671	-0.404323
CG13139.f(modencode)	chr2L:10364514-10366410	0.0385484	0.0586584	-0.600122	-0.672668
nAcRalpha-30D-RC(modencode)	chr2L:9796948-9886214	0.0364071	0.0724733	-0.59983	-0.36618
chr3R_10083762_10084103.0(modencode)	chr3R:10083762-10084103	0.195604	0.0677138	-0.59944	-1.17306
dia.b(modencode)	chr2L:20758126-20767809	0.0269866	0.0307931	-0.59913	-0.926632
dia.c(modencode)	chr2L:20758126-20767809	0.0286566	0.0308149	-0.598695	-0.927384
CG13139.a(modencode)	chr2L:10364465-10366410	0.0411794	0.062272	-0.598581	-0.705111
CG4562-RB(modencode)	chr3R:15692856-15700927	0.0335966	0.113061	-0.598575	-0.200627
CG3797.a(modencode)	chr3L:19052869-19055906	0.0503238	0.086703	-0.597782	-0.254371
ssp4.k(modencode)	chr2R:13406611-13422942	0.00127157	0.0653202	-0.596763	-0.208328
CG3797-RA(modencode)	chr3L:19052863-19055983	0.0503655	0.0887882	-0.596661	-0.257336
jumu-RA(modencode)	chr3R:6175849-6187448	0.0349582	0.00722767	-0.596563	-0.719996
nAcRalpha-30D-RD(modencode)	chr2L:9796948-9886214	0.0360791	0.0722414	-0.596107	-0.367569
Hairless-RB(modencode)	chr3R:16447644-16453103	0.0331811	0.00581797	-0.594609	-1.22711
CG17490-RC(modencode)	chr2L:22430976-22441168	0.057179	0.0730023	-0.5945	-0.42233
vfl.p(modencode)	chrX:19661899-19677588	0.024869	0.180111	-0.593527	-0.240387
nAcRalpha-30D-RA(modencode)	chr2L:9796948-9886214	0.035419	0.071902	-0.593432	-0.367863
dia-RA(modencode)	chr2L:20758126-20767594	0.0275099	0.0306598	-0.593167	-0.926546
CG42324.g(modencode)	chr3L:3485598-3509263	0.0440364	0.110935	-0.593051	-0.258618
dia-RB(modencode)	chr2L:20758126-20767594	0.0291991	0.0306834	-0.592594	-0.927296
CG7137-RA(modencode)	chr2R:15114835-15116118	0.0938424	0.0883499	-0.591265	-0.275961
CG42324.f(modencode)	chr3L:3485642-3509251	0.0439604	0.111425	-0.5905	-0.25647
Cyp9h1-RA(modencode)	chr2R:8728221-8730099	0.100944	0.183204	-0.588635	-0.331651
CG30386.a(modencode)	chr2R:17183650-17187978	0.0144524	0.165748	-0.587279	-1.04308
nc_6835.a(modencode), Uhg5-RC(modencode)	chr2R:10510638-10511426	0.0642092	0.0625208	-0.585818	-0.468774
CG42260.al(modencode)	chr2R:18630908-18685100	0.0750962	0.101879	-0.584618	-0.781614
CG14956-RA(modencode)	chr3L:3155721-3158408	0.0279676	0.143715	-0.584022	-0.138076
CG30386.b(modencode)	chr2R:17183650-17187978	0.0455425	0.165737	-0.58394	-1.04308
nAcRalpha-30D-RB(modencode)	chr2L:9796948-9886214	0.0403028	0.0753434	-0.581974	-0.358003
Acp53C14c.a(modencode)	chr2R:12638281-12638974	0.0200019	0.134845	-0.581969	-1.16894
Grip71.a(modencode)	chr2L:18708849-18711297	0.0923955	0.0298053	-0.5817	-1.60252
Alh-RA(modencode)	chr3R:2923405-2949911	0.012109	0.0918609	-0.581527	-0.291585
dia.a(modencode)	chr2L:20760285-20767548	0.028827	0.0307584	-0.581012	-0.926196
Grip71-RA(modencode)	chr2L:18708800-18711304	0.0939473	0.0293406	-0.580233	-1.59148
Grip71.b(modencode)	chr2L:18708805-18711304	0.0939572	0.029341	-0.58022	-1.59148
4EHP.d(modencode)	chr3R:19927017-19934671	0.0413245	0.0209477	-0.579543	-0.412555
az2-RA(modencode)	chr2R:3397973-3400345	0.0730411	0.182833	-0.578756	-0.183949
CG4562.a(modencode)	chr3R:15692721-15700959	0.0304541	0.0787809	-0.578539	-0.264617
Alh-RD(modencode)	chr3R:2923405-2949542	0.0121002	0.087097	-0.57803	-0.30548
bip1-RB(modencode)	chr3L:8047432-8049534	0.0150739	0.174226	-0.576736	-0.223057
Spp.a(modencode)	chr2L:542776-544660	0.0903032	0.13017	-0.576398	-0.327469
Spp-RA(modencode)	chr2L:542738-544737	0.0904863	0.129676	-0.576093	-0.327825
RhoGAPp190-MIP15955(modencode)	chrX:17534938-17538871	0.114338	0.101898	-0.575439	-0.454253
nAcRalpha-30D-RE(modencode)	chr2L:9796948-9886214	0.0389619	0.0730792	-0.572998	-0.365757
CG42260.ae(modencode)	chr2R:18630908-18685347	0.0727015	0.101113	-0.572745	-0.763552
CG13139.b(modencode)	chr2L:10364799-10366410	0.0486513	0.0556532	-0.57248	-0.682587
CG6923-RB(modencode)	chr3R:7570204-7574831	0.0666839	0.150632	-0.571775	-0.244806
bip1-RA(modencode)	chr3L:8047432-8051872	0.0210002	0.177923	-0.571512	-0.223011
fru-RB(modencode)	chr3R:14242315-14371357	0.185946	0.0531087	-0.571267	-1.774
Dystrophin.n(modencode)	chr3R:15289254-15421594	0.0118398	0.034614	-0.571197	-0.53292
Dystrophin.k(modencode)	chr3R:15395192-15421364	0.00147655	0.0397922	-0.570944	-0.513342
CG7770.a(modencode)	chr3L:19916775-19917788	0.105036	0.19845	-0.569415	-0.129657
CG12182-RA(modencode)	chr3L:2596958-2599570	0.0379452	0.0778525	-0.568955	-0.646197
CG7770-RA(modencode)	chr3L:19916703-19917808	0.105441	0.191614	-0.568088	-0.131307
CG3338-RA(modencode)	chr2L:4382920-4386099	0.068007	0.0608684	-0.567087	-0.317867
trr-RD(modencode)	chrX:1775254-1783885	0.0449099	0.0332163	-0.566908	-0.218836
trr-RC(modencode)	chrX:1775254-1783998	0.0449151	0.0332163	-0.566896	-0.218838
spt4-RA(modencode)	chr2R:8520990-8523546	0.0459648	0.0723044	-0.565478	-0.55668
CG3680.c(modencode)	chr3L:20802771-20806432	0.0704187	0.113964	-0.564807	-0.327015
CG32226-RA(modencode)	chr3L:20290229-20295305	0.0439572	0.07418	-0.564575	-0.34194
CG3267-RA(modencode)	chr2R:2633778-2636595	0.1158	0.029397	-0.564479	-0.722146
CG31344-RA(modencode)	chr3R:11049062-11051145	0.082904	0.0518928	-0.563756	-0.980883
Alh-RG(modencode)	chr3R:2923405-2937805	0.126902	0.0443382	-0.563472	-0.485905
CG3680.a(modencode)	chr3L:20802771-20806432	0.0709679	0.125487	-0.563183	-0.306449
CG12370-RB(modencode)	chr2R:8361922-8375491	0.00374692	0.19824	-0.563093	-0.162425
CG6293-RA(modencode)	chr3R:6133528-6137467	0.0932912	0.0600943	-0.562992	-0.510531
tinc-RA(modencode)	chr3R:13677739-13698239	0.0122276	0.182951	-0.562672	-0.210217
tinc-RB(modencode)	chr3R:13677739-13698239	0.0123271	0.182597	-0.56238	-0.231339
CG7922-RA(modencode)	chr3R:17307922-17313190	0.0220222	0.0375837	-0.562314	-0.508887
CG7922.a(modencode)	chr3R:17307938-17313166	0.0220223	0.037347	-0.562286	-0.508165
CG3797.b(modencode)	chr3L:19052526-19055937	0.0546305	0.043228	-0.562223	-0.425126
CG6633.a(modencode)	chr3R:6952192-6954190	0.0983849	0.0246004	-0.562125	-2.50403
pxb.a(modencode)	chr3R:11491882-11515711	0.0614136	0.0107495	-0.561467	-0.965792
CG6923-RA(modencode)	chr3R:7570083-7575208	0.0707166	0.093438	-0.561225	-0.34015
CG42260.g(modencode)	chr2R:18630908-18685834	0.0719564	0.0882841	-0.561176	-0.780537
CG3680.b(modencode)	chr3L:20802771-20806455	0.0716056	0.118065	-0.560991	-0.334539
CG12187-RA(modencode)	chr3L:2670603-2689964	0.0188082	0.0608407	-0.559516	-0.343863
CG13139-RA(modencode)	chr2L:10365029-10366366	0.0523174	0.0577655	-0.558606	-0.678678
tinc-RD(modencode)	chr3R:13677739-13698239	0.0127653	0.183861	-0.558406	-0.211354
CG30419.a(modencode)	chr2R:20099984-20117327	0.0488036	0.130003	-0.557129	-0.340692
CG4631-RA(modencode)	chr2L:16607423-16609880	0.00976304	0.00534007	-0.556948	-4.09862
Amyrel.c(modencode)	chr2R:12538411-12540207	0.0846123	0.106112	-0.556811	-0.295504
spir-MIP21567(modencode)	chr2L:20343220-20344969	0.0314851	0.0219265	-0.555988	-1.09834
GluClalpha-RE(modencode)	chr3R:15556638-15590429	0.0247156	0.19726	-0.555515	-0.197718
4EHP-RB(modencode)	chr3R:19927309-19934687	0.0634814	0.0218486	-0.555211	-0.420165
sns.b(modencode)	chr2R:4685969-4743142	0.00810275	0.180362	-0.553536	-0.206979
sns-RB(modencode)	chr2R:4685970-4743142	0.00812002	0.182945	-0.553429	-0.204724
sns-RA(modencode)	chr2R:4685933-4743142	0.00811332	0.183605	-0.553354	-0.207557
CG4631-AT13171(modencode)	chr2L:16607424-16610037	0.00992648	0.00909151	-0.553127	-4.35889
CG4631-MIP03871(modencode)	chr2L:16607370-16610037	0.00989973	0.00909136	-0.552954	-4.35914
MIP22686(modencode)	chr4:446693-447227	0.192371	0.117721	-0.55295	-1.06619
Zasp52-RK(modencode)	chr2R:11658456-11702455	0.14405	0.0906354	-0.552204	-0.47226
CG33205.b(modencode)	chr3L:9822525-9827452	0.176287	0.0902813	-0.551173	-0.332104
CG9254-RA(modencode)	chr2L:13595503-13597186	0.0429724	0.0466938	-0.550482	-1.53541
CG3680-RA(modencode)	chr3L:20802669-20806462	0.0713459	0.115974	-0.549915	-0.339883
kermit-RC(modencode)	chr2R:4034421-4036694	0.073626	0.0771618	-0.549209	-0.592105
chr2R_16597524_16598224.0(modencode)	chr2R:16597524-16598224	0.187506	0.0886134	-0.5492	-1.24545
Aats-cys-RA(modencode)	chr2R:12030511-12033415	0.0440059	0.0970765	-0.548111	-0.277956
Orc6-RA(modencode)	chr2R:5732941-5734062	0.176802	0.0769702	-0.54759	-0.679493
CG33205-RI(modencode)	chr3L:9822522-9827447	0.179154	0.0866089	-0.545792	-0.34089
Tsp66E.c(modencode)	chr3L:8905644-8925165	0.0370018	0.00822663	-0.545257	-0.742295
CG8004-RA(modencode)	chr3L:19920283-19921677	0.129726	0.192007	-0.544827	-0.120546
ssp4.c(modencode)	chr2R:13406523-13414611	0.00548798	0.102342	-0.544576	-0.168575
kermit.a(modencode)	chr2R:4034422-4036673	0.0762249	0.0800064	-0.544024	-0.586754
Amyrel.d(modencode)	chr2R:12538062-12540207	0.0501946	0.157313	-0.543908	-0.199687
inaE-RA(modencode)	chrX:13677782-13701660	0.125767	0.177474	-0.543518	-0.134361
CG9410-RA(modencode)	chr2R:2556529-2557581	0.0938126	0.124211	-0.542873	-0.221915
CG5781-MIP22220(modencode)	chr2L:12695835-12696460	0.114033	0.16557	-0.542604	-0.395971
Tsp66E.a(modencode)	chr3L:8905644-8925165	0.0368284	0.00874757	-0.541969	-0.729043
Tsp66E.e(modencode)	chr3L:8905616-8925218	0.0368744	0.00877678	-0.541691	-0.729268
Tsp66E-RA(modencode)	chr3L:8905605-8925251	0.0370793	0.00822761	-0.54106	-0.741559
Tsp66E-RC(modencode)	chr3L:8905616-8925251	0.0369547	0.0085694	-0.541001	-0.734994
CG34261.b(modencode)	chr3L:21189893-21190835	0.0441586	0.0268947	-0.540936	-0.719994
CG34449.f(modencode)	chrX:9225380-9248964	0.0503678	0.0575071	-0.540856	-0.273538
Tsp66E.b(modencode)	chr3L:8905644-8925165	0.0369653	0.00796624	-0.540216	-0.756022
kermit-RD(modencode)	chr2R:4034422-4036940	0.0880706	0.0827414	-0.540118	-0.5938
CG34449.g(modencode)	chrX:9220568-9248939	0.0493684	0.0802201	-0.539528	-0.189483
CG34449.e(modencode)	chrX:9220569-9248919	0.0493748	0.048085	-0.539493	-0.264856
CG34449.d(modencode)	chrX:9220568-9249244	0.0491858	0.129019	-0.539096	-0.189674
mura.b(modencode)	chr3R:5363823-5377382	0.0892565	0.00537239	-0.539036	-1.45527
CG34449.k(modencode)	chrX:9220569-9249337	0.0491288	0.081089	-0.539004	-0.265841
ssp4-RH(modencode)	chr2R:13406523-13416455	0.0039476	0.0995388	-0.538833	-0.168869
br.z(modencode)	chrX:1506374-1555828	0.0194219	0.186781	-0.538741	-0.279446
CG31352-RA(modencode)	chr3R:5520206-5531220	0.0311793	0.11234	-0.53804	-0.131655
ssp4-RA(modencode)	chr2R:13407681-13423006	0.0142534	0.0770932	-0.537765	-0.300933
Tsp66E.d(modencode)	chr3L:8905855-8925218	0.0370212	0.00862685	-0.537747	-0.739944
CG34261-RA(modencode)	chr3L:21189947-21190840	0.0463132	0.0261085	-0.536899	-0.723375
CG34261.a(modencode)	chr3L:21189931-21190835	0.0463088	0.0268945	-0.536898	-0.71999
spir-MIP21867(modencode)	chr2L:20343173-20344969	0.0340368	0.0214452	-0.535862	-1.09826
CG2046.a(modencode)	chr3R:1619025-1620053	0.121993	0.188696	-0.535717	-0.115981
mura-RC(modencode)	chr3R:5363817-5377382	0.0893128	0.00536499	-0.534858	-1.45406
GluClalpha.h(modencode)	chr3R:15556381-15594232	0.0097863	0.18621	-0.533311	-0.107123
star1-RA(modencode)	chr3L:18553214-18569426	0.0536156	0.0605679	-0.53238	-0.342659
chr2L_7133822_7134047.0(modencode)	chr2L:7133822-7134047	0.122538	0.012504	-0.531751	-4.03377
CG32450-RA(modencode)	chr3L:22322807-22323921	0.0614734	0.194801	-0.531474	-0.797394
CG34261-RB(modencode)	chr3L:21189893-21190801	0.0487985	0.0261084	-0.530025	-0.723375
Tsp66E-RB(modencode)	chr3L:8905599-8925251	0.0380962	0.0079603	-0.529858	-0.760586
Nopp140.f(modencode)	chr3L:21825845-21829787	0.082904	0.0299797	-0.529432	-0.578456
Nopp140.e(modencode)	chr3L:21825845-21829787	0.0829158	0.0300405	-0.529416	-0.578318
Nopp140.c(modencode)	chr3L:21825845-21829787	0.0829136	0.0299803	-0.529411	-0.578462
Nopp140.d(modencode)	chr3L:21825845-21829787	0.0829136	0.0300225	-0.529411	-0.577787
mura.a(modencode)	chr3R:5363823-5377079	0.0876476	0.0052904	-0.528971	-1.45499
nc_20815.a(modencode)	chr4:929382-931123	0.0348661	0.0339644	-0.528487	-1.01494
mura.c(modencode)	chr3R:5363823-5377368	0.0874654	0.00530752	-0.528452	-1.45298
CG3104.b(modencode)	chr2L:2849256-2855780	0.00651116	0.0671309	-0.527733	-0.399357
CG4991-RB(modencode)	chrX:16995070-16998598	0.162334	0.0240455	-0.527618	-1.81498
Hairless-RC(modencode)	chr3R:16447506-16454637	0.029509	0.0645211	-0.527317	-0.664859
CG5068.a(modencode)	chr3L:8979812-8981982	0.129114	0.0765474	-0.527242	-0.146494
mu2-RC(modencode)	chr3L:1942729-1947532	0.0350328	0.00518991	-0.526803	-0.311744
mu2-RB(modencode)	chr3L:1942729-1947532	0.0350332	0.00518991	-0.526774	-0.31174
Hairless-RD(modencode), Hairless-RA(modencode)	chr3R:16447644-16454637	0.0294956	0.0646954	-0.526705	-0.663744
CG13624-RD(modencode)	chr3R:20385002-20408678	0.0440369	0.00834553	-0.526691	-1.10468
ssp4-RE(modencode)	chr2R:13407073-13423006	0.00656081	0.0543076	-0.526492	-0.297806
nc_7369.a(modencode)	chr2R:12678596-12678958	0.0456156	0.14176	-0.52647	-0.157225
ssp4.a(modencode)	chr2R:13407073-13423006	0.0065468	0.0543045	-0.526446	-0.297816
hkl-RB(modencode)	chr2L:19045295-19048399	0.0145405	0.159506	-0.525397	-0.186501
CG6472.b(modencode)	chr2R:12768398-12772216	0.0968019	0.0923682	-0.525166	-2.09361
CG10089.e(modencode)	chr3L:13458719-13467643	0.106775	0.14639	-0.525026	-0.367451
mu2-RA(modencode)	chr3L:1942699-1947540	0.0355422	0.00654555	-0.524995	-0.285098
CG10089.c(modencode)	chr3L:13458719-13467887	0.106068	0.145846	-0.524972	-0.368618
Nopp140-RA(modencode)	chr3L:21825766-21829836	0.0839241	0.0616764	-0.524708	-0.518496
CG2046-RA(modencode)	chr3R:1619022-1620137	0.126518	0.188277	-0.522979	-0.11473
CG32281-RA(modencode)	chr3L:3169375-3170909	0.0385012	0.112348	-0.522899	-0.329038
CG4991-RA(modencode)	chrX:16996389-16998597	0.164904	0.0237895	-0.522415	-1.81902
Gpo-1-RD(modencode)	chr2R:11745256-11748849	0.148443	0.170621	-0.522068	-0.275084
GluClalpha.aa(modencode)	chr3R:15556681-15594232	0.011136	0.188398	-0.521197	-0.104658
nc_25160.a(modencode)	chrX:21889694-21892708	0.0121449	0.163677	-0.520718	-0.524949
puc.a(modencode)	chr3R:3932393-3948023	0.139653	0.197044	-0.519827	-0.0446025
ssp4.d(modencode)	chr2R:13407447-13423006	0.00929817	0.0227975	-0.519467	-0.214886
Rgk3.b(modencode)	chr2R:17151836-17167506	0.183079	0.0846587	-0.519172	-1.22428
hkl.b(modencode)	chr2L:19045295-19048762	0.0146074	0.109632	-0.5191	-0.238662
hkl-RA(modencode)	chr2L:19045368-19048762	0.0146081	0.109632	-0.519078	-0.238662
hkl.c(modencode)	chr2L:19045295-19048997	0.014622	0.10794	-0.519037	-0.24084
chr3L_17996762_17998192.0(modencode)	chr3L:17996762-17998192	0.0467538	0.0731172	-0.518989	-0.962121
Dhpr-RA(modencode)	chr3L:9127635-9129011	0.0772083	0.0348953	-0.517191	-0.597321
fl(2)d-RA_fl(2)d-RA(modencode)	chr2R:9707129-9712068	0.0658738	0.141288	-0.516917	-0.199294
CG8909-RB(modencode)	chrX:15804925-15814742	0.0987971	0.0964971	-0.51532	-0.33202
CG42336-RB(modencode)	chr2R:7182041-7185041	0.172458	0.176519	-0.513888	-0.289424
ssp4-RB(modencode)	chr2R:13407073-13423006	0.00731356	0.0516828	-0.513405	-0.29863
Pkc53E.i(modencode)	chr2R:12812016-12831609	0.0332013	0.0348714	-0.512788	-0.432589
CG4991-RC(modencode)	chrX:16995976-16998597	0.169244	0.0237337	-0.510999	-1.81797
CG33205-RA(modencode)	chr3L:9814768-9827447	0.195179	0.0912784	-0.510974	-0.330693
CG34449.c(modencode)	chrX:9220375-9248919	0.0449563	0.0430134	-0.510581	-0.306439
Pak-RD(modencode)	chr3R:2176628-2185772	0.0725851	0.16117	-0.510227	-0.171044
Axn-RA(modencode)	chr3R:25848473-25861033	0.0404751	0.102826	-0.509964	-0.17397
Axn-RD(modencode)	chr3R:25848473-25861033	0.0403855	0.102937	-0.509904	-0.173927
onecut.a(modencode)	chr4:619180-628377	0.0385339	0.0972513	-0.509881	-0.851903
GluClalpha.j(modencode)	chr3R:15556277-15591353	0.0122825	0.0264	-0.508943	-0.722777
Hairless.b(modencode)	chr3R:16447644-16454627	0.0352427	0.0666163	-0.508764	-0.668331
CG4991.a(modencode)	chrX:16996320-16998597	0.172629	0.0238135	-0.507004	-1.81723
CG7857-RA(modencode)	chr3L:15496700-15498012	0.0749139	0.0370275	-0.506326	-0.507835
CG33205-RE(modencode)	chr3L:9814768-9827447	0.198574	0.0906589	-0.506305	-0.333146
Arp14D-RA(modencode)	chrX:16442818-16448025	0.00671904	0.0447347	-0.504176	-0.56448
Dystrophin.l(modencode)	chr3R:15394839-15421659	0.00457598	0.0358893	-0.502934	-0.568251
Dg-RC(modencode)	chr2R:11968674-11986139	0.00685926	0.0088081	-0.501766	-0.403038
CG6854.c(modencode)	chr3L:15091548-15103837	0.0393533	0.16638	-0.500388	-0.271227
CG17528.q(modencode)	chr2R:702931-711939	0.0273079	0.00719465	-0.499915	-1.11745
CG14434-RA(modencode)	chrX:6745942-6746671	0.123645	0.184734	-0.499563	-0.15274
CG3104.c(modencode)	chr2L:2848999-2855780	0.00860187	0.0298058	-0.498764	-0.5608
CG42260.k(modencode)	chr2R:18630908-18684742	0.0655631	0.152629	-0.498149	-0.534262
Glycogenin.e(modencode)	chr2R:17087971-17097545	0.0494346	0.18687	-0.497531	-0.207342
CG42260.m(modencode)	chr2R:18630908-18684628	0.0592552	0.169075	-0.497077	-0.47948
Lap1.c(modencode)	chr2R:10823130-10828227	0.00938538	0.0439549	-0.496246	-0.241078
Lap1.d(modencode)	chr2R:10823172-10828227	0.00941528	0.0439547	-0.496002	-0.241073
CG10419.a(modencode)	chr3L:19092219-19093608	0.0597357	0.182745	-0.495401	-0.275812
CG34362.n(modencode)	chr3R:23852335-23914188	0.165568	0.110246	-0.494264	-0.333784
CG14434.a(modencode)	chrX:6745942-6758978	0.0639339	0.149779	-0.494241	-0.180444
CG9265-RA(modencode)	chr2L:21057624-21070281	0.0378673	0.146114	-0.494112	-0.27838
CG42260.b(modencode)	chr2R:18630908-18684680	0.0621448	0.110415	-0.493588	-0.740286
CG42324.i(modencode)	chr3L:3485598-3509732	0.127162	0.0140462	-0.493455	-0.481744
Lap1-RA(modencode)	chr2R:10823130-10827908	0.00962386	0.0364794	-0.492889	-0.252117
per.a(modencode)	chrX:2579613-2586813	0.0717476	0.195792	-0.492636	-0.182908
per-RA(modencode)	chrX:2579613-2586813	0.07144	0.189113	-0.492496	-0.170246
CG42324.h(modencode)	chr3L:3485642-3509732	0.127408	0.014046	-0.492409	-0.481746
Lap1.b(modencode)	chr2R:10823172-10827844	0.0096727	0.0448767	-0.49229	-0.248309
Lap1.a(modencode)	chr2R:10823130-10827807	0.00964145	0.04469	-0.491736	-0.249326
CG17528.m(modencode)	chr2R:702931-711837	0.0278011	0.00720056	-0.490787	-1.1178
CG17528.n(modencode)	chr2R:702931-711824	0.0278572	0.00720268	-0.490186	-1.1179
nc_1625.a(modencode)	chr2L:7491821-7495619	0.0140009	0.0182053	-0.490076	-4.57351
nc_20813.c(modencode)	chr4:925288-928159	0.0563563	0.17301	-0.490031	-0.44102
CG8909-RC(modencode)	chrX:15804925-15814818	0.105019	0.0785171	-0.489794	-0.373638
ssp4.e(modencode)	chr2R:13407252-13423006	0.011652	0.0451636	-0.489759	-0.254815
CG17528.r(modencode)	chr2R:702931-711824	0.0279798	0.00720481	-0.489136	-1.11742
CG17528.p(modencode)	chr2R:702931-711824	0.0280246	0.00720472	-0.489065	-1.11742
Dystrophin-RD(modencode)	chr3R:15334982-15421117	0.0349807	0.0379261	-0.48862	-0.543523
4EHP-MIP06235(modencode)	chr3R:19893088-19934642	0.0880821	0.0576332	-0.488274	-0.490174
CG17528.o(modencode)	chr2R:702931-711824	0.0280876	0.00721328	-0.487559	-1.11755
Dg-RA(modencode)	chr2R:11968674-11986072	0.00726033	0.00774944	-0.487003	-0.413382
CG5177-RA(modencode)	chr2L:7404953-7408601	0.118692	0.132335	-0.48679	-0.149886
CG17446-RA(modencode)	chrX:9164651-9166985	0.0783658	0.0256995	-0.486569	-0.65192
vfl.h(modencode)	chrX:19660517-19677588	0.0572792	0.164759	-0.485743	-0.141074
ssp4.j(modencode)	chr2R:13406611-13422942	0.00859874	0.0643648	-0.485734	-0.211864
ssp4.i(modencode)	chr2R:13406611-13422942	0.0085852	0.0643624	-0.485688	-0.211867
Bub1-RA(modencode)	chr2L:5278956-5283286	0.0663664	0.0411548	-0.484727	-0.748632
CG34449.b(modencode)	chrX:9220333-9249244	0.0462476	0.0977993	-0.484545	-0.241292
Gpo-1.c(modencode)	chr2R:11745231-11749485	0.178813	0.172431	-0.484026	-0.272958
CG17446.a(modencode)	chrX:9164683-9167071	0.0791507	0.0250333	-0.483913	-0.650255
Dg-RB(modencode)	chr2R:11968674-11986139	0.00772462	0.00778829	-0.483876	-0.414253
Gpo-1-RB(modencode)	chr2R:11745231-11749530	0.177078	0.172772	-0.48383	-0.272662
CG17734-MIP20553(modencode)	chr3R:7067930-7069673	0.126326	0.0840096	-0.483395	-0.268269
GluClalpha.i(modencode)	chr3R:15556381-15594542	0.0172892	0.125804	-0.482713	-0.12523
Myo28B1-RC(modencode)	chr2L:7666047-7684537	0.135569	0.13148	-0.482435	-0.247106
CG9098-RA(modencode)	chr2L:6007364-6012398	0.111089	0.0507453	-0.482388	-0.432701
Gpo-1.b(modencode)	chr2R:11745236-11750399	0.182859	0.171849	-0.481476	-0.273857
CG33054-AT19489(modencode)	chr3L:21190124-21191272	0.0467232	0.0705185	-0.481332	-0.496322
CG17446.b(modencode)	chrX:9164352-9167071	0.0806119	0.0250557	-0.480474	-0.690901
CG17734-RB(modencode)	chr3R:7067878-7069830	0.131062	0.0793325	-0.480114	-0.276651
nc_23928.a(modencode)	chrX:15701486-15701985	0.0638764	0.0988431	-0.479406	-1.00737
nc_4991.a(modencode)	chr2R:3618085-3623125	0.12886	0.128886	-0.479353	-0.600242
Gpo-1-RC(modencode)	chr2R:11745231-11750504	0.18249	0.171722	-0.479242	-0.27435
Gpo-1.a(modencode)	chr2R:11745248-11750270	0.183014	0.172472	-0.478422	-0.272957
ome-RG(modencode)	chr3L:14699854-14740971	0.0099009	0.103086	-0.478381	-0.340111
l(1)G0196.c_l(1)G0196.c(modencode)	chrX:21888929-21909747	0.0121788	0.0191875	-0.477148	-1.11715
nc_11763.a(modencode)	chr3L:9835616-9836120	0.0947525	0.0334831	-0.476611	-2.63682
l(1)G0196.a_l(1)G0196.a(modencode)	chrX:21889016-21909502	0.012254	0.0182974	-0.476534	-1.15857
l(1)G0196.b_l(1)G0196.b(modencode)	chrX:21888929-21909504	0.0122373	0.0192591	-0.475799	-1.11658
CG9410-RD(modencode), CG15908-RB(modencode)	chr2R:2555655-2557581	0.107692	0.161902	-0.475737	-0.179057
ph-p.a(modencode)	chrX:2020243-2031358	0.0880976	0.18238	-0.475517	-0.296016
capt-RB(modencode)	chr2L:1151678-1156322	0.116112	0.0850563	-0.475447	-0.486453
capt.d(modencode)	chr2L:1151678-1156571	0.116083	0.0850899	-0.475405	-0.486081
Myo28B1-RD(modencode)	chr2L:7678719-7684784	0.130625	0.129329	-0.475085	-0.251007
ph-p-RB(modencode)	chrX:2020243-2031187	0.0888743	0.18492	-0.474723	-0.292945
CG9098-RB(modencode)	chr2L:6007366-6011401	0.114116	0.0501297	-0.47446	-0.434259
Uhg5-RD(modencode)	chr2R:10509837-10512013	0.104978	0.0675462	-0.474237	-0.394252
ssp4.f(modencode)	chr2R:13406611-13422942	0.00936851	0.0629281	-0.473411	-0.212183
Ppcs.f(modencode)	chr3R:14966086-14973904	0.0518671	0.0147446	-0.473254	-1.55813
CG9265.a(modencode)	chr2L:21057702-21071371	0.0750742	0.160753	-0.471667	-0.272431
kermit-RB(modencode)	chr2R:4034421-4044232	0.094082	0.0823295	-0.471519	-0.593349
CG42260.as(modencode)	chr2R:18630908-18684912	0.0751093	0.0956692	-0.471427	-0.812347
CG32026-RA(modencode)	chr3L:8829562-8831943	0.0153754	0.163622	-0.471087	-0.571173
onecut-RA(modencode)	chr4:619180-628377	0.0437484	0.0901623	-0.469717	-0.64146
CG4669-RA(modencode)	chr3L:5227537-5229783	0.0588028	0.102292	-0.469563	-1.0556
CG13244-RA(modencode)	chr2L:15916824-15917652	0.175808	0.182889	-0.468549	-2.43915
CG10321-RA(modencode)	chr2R:17522106-17525971	0.0891642	0.0763749	-0.466242	-0.21672
CG11000.d(modencode)	chr3R:1628825-1635042	0.0784162	0.159132	-0.465643	-0.417124
chb-RA(modencode)	chr3L:21168749-21176463	0.0195928	0.113512	-0.465104	-0.26607
scny.a(modencode)	chr3L:5764265-5768948	0.0496038	0.0596489	-0.464232	-0.173136
mura-RA(modencode)	chr3R:5363823-5377570	0.0935659	0.00542115	-0.463417	-1.50177
Gpo-1-RA(modencode)	chr2R:11745231-11749484	0.183174	0.172676	-0.462978	-0.272306
gfA.e(modencode)	chrX:19221450-19242480	0.120868	0.0538299	-0.462901	-0.254838
CG10188-RA(modencode)	chr2L:19502334-19508760	0.0576256	0.0155284	-0.462645	-0.699157
CG10188.a(modencode)	chr2L:19502334-19508909	0.0576209	0.0151072	-0.46227	-0.699459
CG10188-RB(modencode)	chr2L:19502334-19508909	0.0576224	0.0150228	-0.46227	-0.69987
CG10188.b(modencode)	chr2L:19502334-19508909	0.0576244	0.0151068	-0.462267	-0.69946
CG32432-RA(modencode)	chr3L:20837425-20878307	0.0151856	0.0710586	-0.461476	-0.307929
CG33558-RC(modencode)	chr2R:2813175-2859159	0.0143861	0.196053	-0.461331	-0.12125
CG33558.b(modencode)	chr2R:2813175-2859314	0.0143998	0.194688	-0.461279	-0.121838
CG42513-RB(modencode)	chr3L:16484938-16516025	0.034692	0.0493618	-0.460887	-0.342592
CG4882-RA(modencode)	chr2R:19768326-19770037	0.175334	0.126372	-0.460725	-0.875777
mura-RB(modencode)	chr3R:5363823-5377566	0.089554	0.00535935	-0.459384	-1.49932
gfA.d(modencode)	chrX:19221177-19242477	0.123129	0.0530221	-0.459262	-0.299287
gfA.c(modencode)	chrX:19221105-19242480	0.123097	0.0537295	-0.459237	-0.299626
CG42514-RC(modencode)	chr3L:16484948-16488368	0.0640965	0.0719919	-0.458841	-0.28687
CG7768-RA(modencode)	chr3L:14211301-14212071	0.0699735	0.0325749	-0.457576	-0.844259
CG7295-RA(modencode)	chr2L:1869867-1870956	0.184299	0.135843	-0.456086	-1.38144
CG32048-RB(modencode)	chr3L:9576603-9587669	0.0939024	0.0279119	-0.455407	-0.676445
nc_20815.b(modencode)	chr4:929362-933859	0.0230321	0.0326631	-0.455136	-1.01675
CG33298.b(modencode)	chr2L:9495472-9520696	0.0118843	0.0378616	-0.454966	-0.183242
CG33298.c(modencode)	chr2L:9495472-9520696	0.0120033	0.0378584	-0.454255	-0.183249
chb-RB(modencode)	chr3L:21165953-21176378	0.0152678	0.124086	-0.45378	-0.211235
CG42514-RB(modencode)	chr3L:16484948-16489312	0.0704721	0.0694693	-0.453413	-0.290494
MIP19519(modencode)	chr3R:16747220-16748433	0.112447	0.188705	-0.453282	-0.828605
Msp-300.a(modencode)	chr2L:5151749-5205690	0.0180978	0.186313	-0.453124	-0.211794
Pde9-RC(modencode)	chrX:12685497-12725669	0.133954	0.0937633	-0.453088	-0.595451
CG42514-GM17804(modencode)	chr3L:16484928-16488469	0.0748999	0.0453006	-0.452954	-0.335042
Pak.g(modencode)	chr3R:2179902-2185772	0.0998591	0.145972	-0.452946	-0.193307
CG10858-RA(modencode)	chr3L:3748525-3755201	0.020128	0.101113	-0.452636	-1.57473
CG42260.aj(modencode)	chr2R:18630908-18685100	0.084726	0.096848	-0.452555	-0.809495
chb-RC(modencode)	chr3L:21170944-21176380	0.0150092	0.125944	-0.452342	-0.209684
Pak.f(modencode)	chr3R:2180008-2185772	0.0995777	0.149123	-0.451622	-0.179869
Msp-300.f(modencode)	chr2L:5151749-5206999	0.018379	0.141785	-0.451243	-0.243464
CG17059-RA(modencode)	chr2R:9107796-9108554	0.102719	0.16822	-0.450844	-0.194543
Ppcs-RA(modencode)	chr3R:14966711-14973987	0.0475016	0.05224	-0.450813	-0.766322
MAPk-Ak2-RC(modencode)	chrX:5653941-5657404	0.156129	0.0382077	-0.450692	-0.331529
MAPk-Ak2.a(modencode)	chrX:5653941-5658214	0.156405	0.0383527	-0.450634	-0.330976
MAPk-Ak2-RB(modencode)	chrX:5653926-5658365	0.156426	0.0383736	-0.450534	-0.33064
CoRest-RD(modencode)	chrX:19416165-19419889	0.0124079	0.0603086	-0.450398	-0.749624
CG10321.a(modencode)	chr2R:17522106-17526194	0.0927178	0.074684	-0.450341	-0.22071
MAPk-Ak2-RD(modencode)	chrX:5653929-5658246	0.15651	0.0384385	-0.450279	-0.330808
CG8379-RB(modencode)	chr3R:4650041-4653074	0.0877863	0.178365	-0.450183	-0.174936
CG8379-RA(modencode)	chr3R:4650041-4653074	0.0877852	0.178368	-0.45018	-0.174937
Pak.h(modencode)	chr3R:2179193-2185772	0.101593	0.16729	-0.450064	-0.173943
CG32048-RA(modencode)	chr3L:9540319-9587669	0.0897528	0.0274152	-0.449871	-0.669323
CG33298-RD(modencode)	chr2L:9495438-9520714	0.0115386	0.0368209	-0.449784	-0.184869
CG33298-RC(modencode)	chr2L:9495438-9520696	0.0116247	0.0368162	-0.449032	-0.184865
CG33298.a(modencode)	chr2L:9495472-9520696	0.0116284	0.0368209	-0.448978	-0.184869
Ank2-RN(modencode)	chr3L:7697872-7706775	0.166304	0.14336	-0.448946	-0.205197
mei-P26.c(modencode)	chrX:9057262-9067067	0.0605106	0.0211273	-0.447326	-0.488553
Cyp9c1-RA(modencode)	chr2R:20518454-20520569	0.0288192	0.127223	-0.446572	-0.281948
CG18731.a(modencode)	chr3R:25550749-25551413	0.104022	0.0298197	-0.445532	-0.506971
Axn-RB(modencode)	chr3R:25853067-25861033	0.0796402	0.107805	-0.445158	-0.167782
CG42260.y(modencode)	chr2R:18630702-18684628	0.0895733	0.111667	-0.444699	-0.618387
CG17707-RB(modencode)	chrX:39327-44813	0.0675764	0.00586038	-0.444376	-1.27678
plx.f(modencode)	chr3R:1527097-1538566	0.0845159	0.137249	-0.444222	-0.330181
CG18731-RA(modencode)	chr3R:25550744-25551454	0.104974	0.02982	-0.444002	-0.506968
Pak.j(modencode)	chr3R:2180249-2185772	0.0986929	0.163063	-0.443977	-0.175823
Axn.b(modencode), Axn-RE(modencode)	chr3R:25853067-25861033	0.077993	0.107858	-0.443923	-0.167737
capt.c(modencode)	chr2L:1151678-1156571	0.1352	0.0844276	-0.443683	-0.489352
plx.a(modencode)	chr3R:1527097-1538587	0.0848679	0.137101	-0.443219	-0.330249
IFa-RA(modencode)	chr2R:20465097-20465657	0.0868165	0.0699799	-0.442499	-0.536475
CG42260.ac(modencode)	chr2R:18630908-18685347	0.0797022	0.0962199	-0.442261	-0.789423
CG42514-RA(modencode)	chr3L:16484948-16489318	0.0734148	0.0705462	-0.442168	-0.290927
CG6043.l(modencode)	chr2L:13267023-13284043	0.0801976	0.0307833	-0.441671	-0.665603
scny-RA(modencode)	chr3L:5762102-5768948	0.058205	0.0677886	-0.440685	-0.172288
Hrs-RA(modencode)	chr2L:2740995-2743377	0.108751	0.112598	-0.440511	-0.225621
IFa.a(modencode)	chr2R:20465089-20465754	0.0829035	0.0736088	-0.440191	-0.542741
Hrb87F-RB(modencode)	chr3R:9483046-9486243	0.0990162	0.105398	-0.440129	-0.284809
br.ab(modencode)	chrX:1502824-1555821	0.0852076	0.191413	-0.440104	-0.273693
CG14509-RC(modencode)	chr3R:24998987-25020964	0.150262	0.0148668	-0.439909	-0.898606
Hrb87F.b(modencode)	chr3R:9482475-9486395	0.101763	0.128068	-0.43985	-0.253909
Hrb87F.c(modencode), Hrb87F-RA(modencode)	chr3R:9482475-9486429	0.101784	0.128013	-0.439793	-0.254081
Caki.o(modencode)	chr3R:17609131-17648401	0.109602	0.0885584	-0.439382	-0.311211
Caki.k(modencode)	chr3R:17609280-17648401	0.109622	0.0862328	-0.439302	-0.300699
CG6752-RA(modencode)	chr3R:11016272-11022016	0.0486242	0.0903567	-0.438991	-0.620443
CG14509.b(modencode)	chr3R:24999053-25020852	0.151679	0.0146136	-0.438886	-0.899878
CG34362.r(modencode)	chr3R:23873278-23914167	0.174462	0.0644188	-0.438741	-0.310585
CG34362.s(modencode)	chr3R:23873278-23914167	0.17449	0.0643517	-0.438653	-0.31025
rdx.i(modencode)	chr3R:9792831-9809083	0.0175151	0.0806269	-0.43852	-0.310011
scny-IP16118(modencode)	chr3L:5767039-5769485	0.102694	0.0259228	-0.43846	-0.349961
CG42260.ax(modencode)	chr2R:18630485-18684628	0.0931647	0.0704475	-0.438277	-0.737862
scny-RF(modencode)	chr3L:5764320-5768948	0.0560585	0.0600375	-0.437536	-0.169463
CG10478.b(modencode)	chr3L:6001410-6004216	0.0952495	0.0440306	-0.437284	-0.415827
Hrb87F.a(modencode)	chr3R:9482848-9486429	0.103706	0.14486	-0.437125	-0.224427
CoRest-RA(modencode)	chrX:19415970-19419889	0.0147449	0.0503384	-0.437105	-0.763311
CG6043.g(modencode)	chr2L:13267023-13284043	0.0816645	0.0310526	-0.436606	-0.665336
scny.b(modencode)	chr3L:5762283-5768948	0.059598	0.0623669	-0.436451	-0.175453
CG6043.m(modencode)	chr2L:13267120-13284043	0.0829933	0.0310268	-0.43616	-0.666418
snoRNA:Me28S-A30-RA(modencode)	chr3L:17996078-17996178	0.108855	0.154003	-0.435574	-0.734996
CG42260.ah(modencode)	chr2R:18630629-18684614	0.0952534	0.0582987	-0.43545	-0.869426
CG33054-RB(modencode)	chr3L:21190511-21191272	0.0540484	0.101206	-0.435369	-0.41719
spheroide.a(modencode)	chrX:16594479-16596704	0.148618	0.0618221	-0.435246	-0.818466
nc_20813.d(modencode)	chr4:924343-927563	0.117033	0.0963199	-0.434902	-0.575891
CG14509.a(modencode)	chr3R:24998987-25020995	0.148961	0.0154576	-0.434658	-0.915205
CoRest-RC(modencode)	chrX:19415962-19419874	0.0156478	0.052624	-0.434375	-0.754949
CG14509-RB(modencode)	chr3R:24998986-25020995	0.14894	0.0154373	-0.434247	-0.915486
ade5.a(modencode)	chrX:12651788-12654785	0.180318	0.0750912	-0.434197	-0.514038
Pkc53E.k(modencode)	chr2R:12812016-12832034	0.0635583	0.0303303	-0.434031	-0.573894
Mbs.g(modencode)	chr3L:16045068-16075128	0.0234264	0.0270245	-0.433668	-0.402649
Mbs-RJ(modencode)	chr3L:16045068-16075126	0.0234268	0.0270248	-0.433666	-0.40265
Caki.m(modencode)	chr3R:17609131-17648419	0.113774	0.0886042	-0.433192	-0.311287
Mbs-RH(modencode)	chr3L:16045071-16075130	0.0243743	0.0287192	-0.433139	-0.409562
Caki.h(modencode)	chr3R:17609280-17648419	0.113799	0.0862836	-0.433107	-0.300776
CG42260.f(modencode)	chr2R:18630908-18685822	0.0775279	0.0834957	-0.433104	-0.805325
Mbs.d(modencode)	chr3L:16045012-16075133	0.0243606	0.0286703	-0.433056	-0.409546
CG6043.n(modencode)	chr2L:13266920-13284043	0.0790338	0.0309082	-0.432968	-0.665881
plx.c(modencode)	chr3R:1528299-1538566	0.101929	0.134065	-0.432917	-0.342182
Caki.r(modencode)	chr3R:17609131-17629180	0.114677	0.0396464	-0.432755	-0.59322
nc_13909.a(modencode)	chr3L:21174779-21176396	0.0843002	0.0841477	-0.432586	-0.514915
scny-RE(modencode)	chr3L:5764265-5768948	0.0526353	0.0616407	-0.432539	-0.16715
scny-RC(modencode)	chr3L:5764320-5768948	0.0573971	0.0552131	-0.432498	-0.172599
scrib-RI(modencode)	chr3R:22362003-22407239	0.100025	0.17223	-0.432045	-0.269789
rdx.f(modencode)	chr3R:9792831-9797520	0.0306812	0.0794075	-0.431882	-0.31501
CG6043.k(modencode)	chr2L:13266924-13284043	0.0786371	0.0309082	-0.43177	-0.665881
CG6043.f(modencode)	chr2L:13267120-13284043	0.0853003	0.0312929	-0.431744	-0.666147
Mbs.c(modencode)	chr3L:16045068-16075130	0.0244018	0.0270476	-0.431662	-0.40244
scny.c(modencode)	chr3L:5764094-5768948	0.0571953	0.0552053	-0.431519	-0.174691
Mbs.a(modencode)	chr3L:16045048-16075246	0.0242685	0.0270736	-0.431396	-0.402046
Pkc53E.l(modencode)	chr2R:12812116-12832072	0.0655029	0.0285797	-0.431077	-0.587362
CG9837-RB(modencode)	chr3R:4634671-4635533	0.0579987	0.150682	-0.430628	-0.604318
Mbs.h(modencode)	chr3L:16045043-16075246	0.0243426	0.0270138	-0.430534	-0.402143
Mbs-RI(modencode)	chr3L:16045068-16075126	0.0243998	0.026986	-0.430382	-0.40254
plx-RD(modencode)	chr3R:1528299-1538587	0.0959391	0.136848	-0.429891	-0.330785
scny.d(modencode)	chr3L:5764176-5768948	0.0581581	0.0552576	-0.429868	-0.172536
CG9518-RA(modencode)	chrX:14757022-14765208	0.0971217	0.0959208	-0.429772	-0.999837
CG34449-RA(modencode)	chrX:9220569-9248710	0.143614	0.0348599	-0.429063	-0.26057
CG34449-RB(modencode)	chrX:9220568-9248710	0.143636	0.0630235	-0.429061	-0.18069
Caki.q(modencode)	chr3R:17609131-17616499	0.116251	0.038473	-0.428786	-0.617439
rdx.g(modencode)	chr3R:9792831-9857786	0.0336842	0.0800162	-0.428755	-0.312791
ade5-RA(modencode)	chrX:12651676-12654839	0.173972	0.0750184	-0.428511	-0.512821
CG14621.b(modencode)	chrX:21846524-21849017	0.160605	0.196216	-0.428507	-0.314149
CG6043-RI(modencode)	chr2L:13266878-13284043	0.091228	0.0325099	-0.428412	-0.681033
CG6043.v(modencode)	chr2L:13266878-13284043	0.0910494	0.0323626	-0.428139	-0.681198
scny.e(modencode)	chr3L:5764486-5768948	0.0560774	0.0558664	-0.427851	-0.171089
CG6043.u(modencode)	chr2L:13266878-13284043	0.0912938	0.0324668	-0.427644	-0.681727
CG34449-RC(modencode)	chrX:9225380-9248710	0.148336	0.0552441	-0.427621	-0.27116
br.j(modencode)	chrX:1506374-1557728	0.0452091	0.157649	-0.427363	-0.299417
Atg7-RA(modencode)	chr2R:14507917-14512615	0.1447	0.0203155	-0.426914	-0.863613
CG6043.b(modencode)	chr2L:13266869-13283986	0.0798949	0.0300966	-0.426172	-0.678954
CG33558.c(modencode)	chr2R:2812641-2859251	0.00537582	0.163128	-0.426097	-0.132586
CG6043.a(modencode)	chr2L:13266869-13283986	0.0808942	0.0300977	-0.42598	-0.678953
rdx.h(modencode)	chr3R:9792831-9851681	0.0321391	0.0801043	-0.42592	-0.31303
CG6043-RG(modencode)	chr2L:13261010-13284043	0.0736954	0.0314595	-0.425866	-0.664761
PEK-RA(modencode)	chr3R:1284279-1290510	0.0636971	0.105567	-0.425372	-0.143977
Mbs.b(modencode)	chr3L:16045068-16075130	0.0239102	0.0273034	-0.425157	-0.401701
CG6043-RD(modencode)	chr2L:13261009-13284079	0.0751837	0.031033	-0.424745	-0.667678
CG9977-RA(modencode)	chr3L:2768439-2772360	0.0220458	0.0244279	-0.424661	-0.327527
Mbs-RF(modencode)	chr3L:16066467-16075130	0.00208896	0.0274716	-0.424413	-0.415794
Mbs.e(modencode)	chr3L:16045069-16074854	0.0264764	0.107552	-0.424286	-0.356615
scrib-RC(modencode)	chr3R:22362003-22402897	0.111138	0.049234	-0.424081	-1.17806
scny.f(modencode)	chr3L:5763935-5768948	0.0602358	0.0564709	-0.423846	-0.174268
CG7768.a(modencode)	chr3L:14211286-14212074	0.0870209	0.0325562	-0.423464	-0.844217
CG34365-IP04235(modencode)	chr2R:11312742-11344416	0.0604075	0.0474815	-0.423408	-0.65779
noncoding_6835-SD22445(modencode)	chr2R:10509122-10512003	0.113896	0.0952633	-0.423357	-0.308042
fru.f(modencode)	chr3R:14241496-14371346	0.0608271	0.0413812	-0.423212	-1.17834
Cirl-RE(modencode)	chr2R:4503735-4511640	0.0387869	0.0401919	-0.422933	-0.443721
Uhg5-RA(modencode)	chr2R:10509111-10512013	0.114065	0.0945328	-0.422731	-0.307886
Uhg5-RB(modencode)	chr2R:10509111-10512013	0.114077	0.0945331	-0.422549	-0.307886
CG6043.d(modencode)	chr2L:13261109-13284043	0.0767462	0.0312316	-0.422537	-0.666519
CG9837-RC(modencode)	chr3R:4634670-4635920	0.0667735	0.143377	-0.422192	-0.592184
fal.b(modencode)	chr3L:19287609-19291962	0.00121387	0.0970076	-0.422163	-0.274743
fal-RA(modencode), fal-RB(modencode)	chr3L:19287637-19291962	0.00121387	0.0970077	-0.422162	-0.274742
jumu.a(modencode)	chr3R:6183378-6187348	0.120417	0.00724382	-0.421944	-0.723381
CG6043.i(modencode)	chr2L:13266869-13284043	0.0819341	0.0311744	-0.421901	-0.665617
CG6043.j(modencode)	chr2L:13266869-13284043	0.0828958	0.0311759	-0.42165	-0.665618
PEK.a(modencode)	chr3R:1284279-1288842	0.065517	0.106719	-0.421588	-0.144079
fal.a(modencode)	chr3L:19287609-19291935	0.00112885	0.0959768	-0.421566	-0.275652
CG14322.a(modencode)	chr3R:13486300-13495048	0.0139822	0.0952425	-0.421558	-0.211259
CG14322.b(modencode)	chr3R:13486300-13495028	0.0140919	0.118453	-0.421522	-0.189805
CG42400-RC(modencode)	chr2L:18160421-18204884	0.183712	0.147773	-0.421494	-0.242595
CG6043-RJ(modencode)	chr2L:13266869-13284043	0.0819216	0.0315488	-0.42141	-0.66443
CG13624.c(modencode)	chr3R:20384755-20403171	0.0724963	0.01108	-0.421274	-1.31701
CG6043.o(modencode)	chr2L:13267163-13284043	0.0866826	0.0310692	-0.421258	-0.665744
CG6043-RK(modencode)	chr2L:13266869-13284043	0.0828968	0.0315482	-0.421146	-0.664433
CG6043.c(modencode)	chr2L:13261014-13284043	0.0765767	0.0312529	-0.420997	-0.666112
CG8486.n(modencode)	chr2L:8163135-8190185	0.0418184	0.0808839	-0.420744	-0.408885
MRP-RD(modencode)	chr2L:12722212-12744835	0.0093627	0.0121198	-0.420595	-0.579118
CG6043.h(modencode)	chr2L:13266924-13284043	0.0822979	0.0311757	-0.420562	-0.665613
CG6043-RF(modencode)	chr2L:13261009-13284079	0.0768878	0.0310326	-0.420437	-0.667682
Trn-SR.a(modencode)	chr2L:2759915-2763610	0.0250412	0.0330334	-0.420236	-0.497907
Caki.l(modencode)	chr3R:17609131-17634446	0.119673	0.0437887	-0.419868	-0.549564
CG7768-RB(modencode)	chr3L:14211009-14212390	0.0975381	0.118315	-0.419632	-0.576477
CG13766-IP10767(modencode)	chr2L:6564363-6566180	0.0344422	0.0259285	-0.419517	-0.718389
Trn-SR-RA(modencode)	chr2L:2759845-2763610	0.0253968	0.033031	-0.41893	-0.49792
CG3104.a(modencode)	chr2L:2849256-2855307	0.0120602	0.0670826	-0.418883	-0.40249
cora.d(modencode)	chr2R:15125208-15131370	0.0519555	0.0274179	-0.418871	-1.06121
CG5815-RB(modencode)	chr3R:22938293-22940862	0.114254	0.130615	-0.418749	-0.205545
CG5815.a(modencode)	chr3R:22938278-22940862	0.114254	0.130616	-0.418744	-0.205545
CG5815.b(modencode)	chr3R:22938293-22940862	0.114255	0.130617	-0.418743	-0.205541
CG42613-IP22137(modencode)	chr3R:14795382-14796074	0.108435	0.0144171	-0.418422	-3.36616
CG34362.h(modencode)	chr3R:23873278-23914213	0.196608	0.115363	-0.418005	-0.30589
scny-RD(modencode)	chr3L:5762092-5769385	0.0496265	0.00834406	-0.41793	-0.468281
ome-RF(modencode)	chr3L:14699811-14740971	0.0118957	0.102808	-0.417858	-0.340577
Mbs.f(modencode)	chr3L:16045069-16075084	0.0278688	0.0282786	-0.41763	-0.406481
Mbs-RG(modencode)	chr3L:16045074-16075133	0.0278505	0.0278209	-0.417523	-0.408447
CG5815-RA(modencode)	chr3R:22938206-22940862	0.114752	0.130621	-0.417477	-0.205543
CG6043-RL(modencode)	chr2L:13267409-13284079	0.09465	0.0316619	-0.416093	-0.684004
CG42260.aq(modencode)	chr2R:18630298-18685834	0.0906175	0.0519528	-0.415496	-0.854027
Gcn2-RA(modencode)	chr3R:27221350-27227735	0.0826966	0.132112	-0.41538	-0.105034
CG13766-RA(modencode)	chr2L:6564363-6566587	0.034199	0.0257202	-0.415378	-0.714603
Gcn2.a(modencode)	chr3R:27221380-27227735	0.082705	0.132122	-0.41536	-0.105043
CG8486.p(modencode)	chr2L:8163135-8190185	0.0428271	0.0816978	-0.415021	-0.408933
CG13624-RF(modencode)	chr3R:20384666-20403196	0.0757889	0.0115256	-0.414915	-1.32729
CG13624-RA(modencode)	chr3R:20384666-20403196	0.0757901	0.0115256	-0.414912	-1.32729
MIP19243(modencode)	chr2L:20316005-20317623	0.0675852	0.0226841	-0.414699	-1.47262
RhoGAP102A.f(modencode)	chr4:275938-286694	0.069555	0.0233202	-0.414661	-0.507975
cora.b(modencode)	chr2R:15125208-15131263	0.0577146	0.0276259	-0.414145	-1.12041
CG6043.e(modencode)	chr2L:13261624-13284043	0.087654	0.0310768	-0.414132	-0.666051
CG13984-RA(modencode)	chr2L:6308819-6309475	0.0915477	0.160727	-0.413297	-1.45744
Ddr.a(modencode)	chr2L:6253123-6322576	0.0618222	0.0520751	-0.412695	-0.194629
CG7370-RA(modencode)	chr3L:21762915-21764426	0.0708829	0.178481	-0.412695	-0.662424
chr2L_14087711_14087966.0(modencode)	chr2L:14087711-14087966	0.135397	0.0916428	-0.412511	-0.756844
CG6043.x(modencode)	chr2L:13266869-13284043	0.0928229	0.0324755	-0.411865	-0.681488
CG31921-RA(modencode)	chr2L:329991-332335	0.0741579	0.138372	-0.411753	-0.749085
CG6043.y(modencode)	chr2L:13266869-13284043	0.0939937	0.0324765	-0.411425	-0.681486
Ddr.d(modencode)	chr2L:6253123-6322576	0.0621255	0.054755	-0.411234	-0.184836
CG4587.a(modencode)	chr2L:15647420-15698649	0.105351	0.0429515	-0.411074	-0.299727
PEK.b(modencode)	chr3R:1284279-1289617	0.0682864	0.106155	-0.411021	-0.143595
scrib-RK(modencode)	chr3R:22362062-22429773	0.0890783	0.0288218	-0.411012	-0.414568
scrib-RJ(modencode)	chr3R:22362062-22429778	0.0889849	0.0263441	-0.410951	-0.481128
fd59A-RA(modencode)	chr2R:18754044-18758283	0.0794659	0.119232	-0.410865	-0.223357
AGO2.b(modencode)	chr3L:15547275-15554151	0.166745	0.150583	-0.410711	-0.175001
AGO2.c(modencode)	chr3L:15547275-15554151	0.166418	0.151002	-0.410676	-0.173615
scny-RB(modencode)	chr3L:5764101-5769385	0.0423729	0.00899797	-0.410629	-0.469731
RN-tre-RB(modencode)	chr2R:9875052-9878208	0.0223449	0.196103	-0.410522	-0.159204
CG6043.w(modencode)	chr2L:13266878-13284043	0.0933286	0.0324751	-0.410381	-0.681489
CG6043.s(modencode)	chr2L:13261109-13284043	0.0910583	0.0325286	-0.409539	-0.68245
MRP-RP(modencode)	chr2L:12722212-12744835	0.0107013	0.0120821	-0.409425	-0.576932
scrib-RM(modencode)	chr3R:22362003-22429773	0.0890941	0.0313867	-0.409386	-0.401592
scrib-RL(modencode)	chr3R:22362003-22429773	0.0890016	0.0284746	-0.409326	-0.467385
MRP-RF(modencode)	chr2L:12722212-12744835	0.0113987	0.0121551	-0.409271	-0.576847
MRP-RJ(modencode)	chr2L:12722212-12744835	0.00903454	0.0122932	-0.409194	-0.580341
chr2L_17902827_17903063.0(modencode)	chr2L:17902827-17903063	0.187835	0.1757	-0.408923	-1.06491
CG6043.r(modencode)	chr2L:13261014-13284043	0.0911461	0.0322001	-0.408633	-0.683257
Ank2.d(modencode)	chr3L:7697872-7709607	0.0712217	0.144674	-0.408349	-0.204601
Alh-RF(modencode)	chr3R:2923405-2934143	0.105307	0.10906	-0.408233	-0.337546
CG34449.n(modencode)	chrX:9218969-9249337	0.0285393	0.0328032	-0.408193	-0.441581
CG6043-RH(modencode)	chr2L:13261009-13284079	0.0913955	0.0318968	-0.408079	-0.683816
MRP-RH(modencode)	chr2L:12722212-12744881	0.0114588	0.0121068	-0.408033	-0.5765
mei-S332-RA(modencode)	chr2R:18009606-18012071	0.155798	0.194373	-0.407694	-0.262363
na.a(modencode)	chrX:14160374-14170969	0.127085	0.0893562	-0.407611	-0.302107
CG34415-RC(modencode)	chr2R:12835802-12842759	0.0852648	0.186542	-0.40754	-0.0992448
Ppcs.a(modencode)	chr3R:14965228-14973904	0.0902321	0.00882108	-0.407326	-1.17975
RhoGAP102A.a(modencode)	chr4:275938-285746	0.100417	0.0440906	-0.407027	-0.458409
sno-RA(modencode)	chrX:13097203-13105727	0.0807644	0.0560863	-0.406576	-0.414454
ph-p-RA(modencode)	chrX:2020237-2030738	0.0847556	0.184437	-0.406431	-0.294052
CG6043-RC(modencode)	chr2L:13261010-13284043	0.0951748	0.0323822	-0.406417	-0.667618
PsGEF-RB(modencode)	chrX:2274501-2281696	0.161986	0.138418	-0.406349	-0.280927
ptr.a(modencode)	chrX:2238971-2243908	0.162176	0.176219	-0.40634	-0.261796
Ppcs.d(modencode)	chr3R:14965212-14973987	0.0912408	0.00888616	-0.406324	-1.17924
Ppcs.b(modencode)	chr3R:14965212-14973904	0.091242	0.00888592	-0.406322	-1.17924
MRP-RO(modencode)	chr2L:12718961-12744835	0.0105324	0.0121265	-0.406264	-0.578339
RhoGAP102A.c(modencode)	chr4:275768-285701	0.100622	0.0388319	-0.406145	-0.48605
ph-p.b(modencode)	chrX:2020237-2030913	0.0847231	0.182674	-0.405717	-0.29636
CG8486.r(modencode)	chr2L:8163078-8190185	0.0460849	0.0818659	-0.404553	-0.412646
CG32442-RB(modencode)	chr3L:21521318-21522411	0.105744	0.0735826	-0.404519	-0.18713
CG42285-RA(modencode)	chr3R:4193340-4195642	0.139983	0.188801	-0.404466	-0.399767
CG11319-RA(modencode)	chr2L:6568390-6601093	0.086817	0.0403658	-0.404162	-2.04874
CG32442-RC(modencode)	chr3L:21521318-21522469	0.105958	0.0724747	-0.403866	-0.187237
spir.c(modencode)	chr2L:20339008-20348387	0.0202299	0.0572281	-0.403734	-0.406585
spir.b(modencode)	chr2L:20339020-20348386	0.0208253	0.0571985	-0.40363	-0.406634
CG6043.t(modencode)	chr2L:13261624-13284043	0.0995174	0.0323827	-0.403591	-0.681931
CG30020-RA(modencode)	chr2R:6774254-6780705	0.0608607	0.188232	-0.403436	-0.125854
CG30020.a(modencode)	chr2R:6774269-6780705	0.0608592	0.18823	-0.403435	-0.125859
CG10077.a(modencode)	chr3L:6942587-6949004	0.117642	0.108132	-0.40315	-0.205839
CG10077.c(modencode)	chr3L:6942564-6948670	0.117829	0.1082	-0.403106	-0.205768
CG13624.d(modencode)	chr3R:20384755-20408678	0.0786662	0.0110777	-0.402987	-1.31739
CG34318-RB(modencode)	chr2R:11352014-11358613	0.147578	0.0834919	-0.402891	-0.343437
CG10077-RA(modencode)	chr3L:6942561-6949059	0.117956	0.108143	-0.402726	-0.205838
CG34318-RA(modencode)	chr2R:11346436-11358596	0.14717	0.087416	-0.402704	-0.340747
AGO2-RB(modencode)	chr3L:15547197-15554211	0.169881	0.157469	-0.402369	-0.168785
AGO2-RC(modencode)	chr3L:15547213-15554211	0.16992	0.157469	-0.402301	-0.168785
beat-VII.a(modencode)	chr3R:22474353-22507695	0.111061	0.0275473	-0.401879	-1.37885
beat-VII-RD(modencode)	chr3R:22474353-22507703	0.111062	0.0275474	-0.401878	-1.37885
CG34449.j(modencode)	chrX:9218777-9249337	0.0288923	0.0198905	-0.401817	-0.587782
CG13247-RA(modencode)	chr3L:20363413-20364846	0.0794485	0.036506	-0.401637	-0.738361
scrib-RB(modencode)	chr3R:22362003-22422020	0.0985862	0.0179533	-0.401607	-0.49522
chr2L_18468178_18469239.0(modencode)	chr2L:18468178-18469239	0.0857683	0.18233	-0.401507	-0.433275
scrib-RD(modencode)	chr3R:22362003-22421910	0.0985129	0.0167096	-0.401507	-0.607382
scrib.k(modencode)	chr3R:22362076-22421910	0.098513	0.0166191	-0.401506	-0.607081
scrib.j(modencode)	chr3R:22362087-22421910	0.0987328	0.0176547	-0.401295	-0.496257
scrib.i(modencode)	chr3R:22362235-22421910	0.0987782	0.016992	-0.401263	-0.49794
ventrally-expressed-protein-D.a(modencode)	chr2R:18295960-18296693	0.0915106	0.0101376	-0.401159	-1.49746
Cirl.c(modencode)	chr2R:4502700-4511640	0.0317509	0.0391326	-0.400643	-0.444568
Cirl.b(modencode)	chr2R:4502700-4511640	0.0317514	0.0389682	-0.400643	-0.444998
Cirl.a(modencode)	chr2R:4502700-4511640	0.0317512	0.0391328	-0.400641	-0.44457
scrib.c(modencode)	chr3R:22362062-22421910	0.0991105	0.0168462	-0.400293	-0.500083
sphinx2-RB(modencode)	chr3L:7432799-7433837	0.0869882	0.143413	-0.400137	-1.08917
dmt-RA(modencode)	chr3R:5536804-5540397	0.11982	0.0757404	-0.400071	-0.812661
cora-RA(modencode)	chr2R:15116503-15131502	0.0477891	0.0297045	-0.399968	-0.961166
CG8179-RA(modencode)	chr2R:11346424-11358698	0.148117	0.0925421	-0.399961	-0.284378
CG34449.m(modencode)	chrX:9218656-9249244	0.028942	0.0284118	-0.399699	-0.756535
CG34449.a(modencode)	chrX:9218656-9249337	0.0289184	0.0274814	-0.399684	-0.768186
CG5976.f(modencode)	chr3L:20467961-20472543	0.125914	0.0276679	-0.39894	-0.78148
Mbs-RK(modencode)	chr3L:16045043-16075131	0.0335515	0.0279065	-0.398664	-0.410217
CG4496-RA(modencode)	chr2L:7185461-7188175	0.0785224	0.090699	-0.39848	-0.700585
MRP-RQ(modencode)	chr2L:12722212-12744835	0.010314	0.0122592	-0.397866	-0.578155
Cirl.d(modencode)	chr2R:4503370-4511717	0.0279355	0.0344358	-0.39785	-0.408609
CG13624.f(modencode)	chr3R:20384755-20408678	0.0806761	0.011081	-0.39784	-1.31705
MRP-RK(modencode)	chr2L:12722212-12744881	0.0109081	0.0123353	-0.397167	-0.57807
CG5976.e(modencode)	chr3L:20467961-20472779	0.125674	0.0279694	-0.396955	-0.779231
Cbp80-RA(modencode)	chrX:4544000-4552189	0.0790955	0.0743672	-0.396841	-0.39598
CG13624-RE(modencode)	chr3R:20384666-20408678	0.082346	0.0115195	-0.396587	-1.32767
CG13624-RB(modencode)	chr3R:20384666-20408678	0.0823465	0.0115195	-0.396586	-1.32767
MRP-RM(modencode)	chr2L:12722212-12744881	0.0110343	0.012282	-0.396366	-0.577725
scrib.d(modencode)	chr3R:22362175-22421910	0.0996878	0.0168387	-0.396265	-0.499341
CG17490-RA(modencode)	chr2L:22430838-22433792	0.0599444	0.0222005	-0.395909	-0.568374
MRP-RC(modencode)	chr2L:12722212-12744835	0.00950971	0.0117818	-0.395651	-0.574966
cora.a(modencode)	chr2R:15116503-15131263	0.0529071	0.0297875	-0.39548	-1.01265
RhoGAP102A.b(modencode)	chr4:275938-286065	0.10468	0.0166658	-0.394806	-0.559322
CG11163-RB(modencode)	chr2R:1662174-1670395	0.103902	0.112451	-0.394364	-0.0929642
CG11163.d(modencode)	chr2R:1662218-1670360	0.103403	0.119326	-0.394223	-0.0937578
CG1667-RA(modencode)	chr2R:5730160-5733019	0.126571	0.108942	-0.39265	-0.522812
sm.g(modencode)	chr2R:15417092-15519006	0.128078	0.121606	-0.392536	-0.242327
CG4877-RA(modencode)	chr3L:16379442-16383922	0.0910045	0.0116047	-0.392501	-0.585369
CG8486.o(modencode)	chr2L:8163135-8190185	0.0317403	0.0807904	-0.39226	-0.413385
CPTI-RE02263(modencode)	chr2R:6362272-6364489	0.162797	0.030616	-0.392019	-0.704999
scrib.l(modencode)	chr3R:22362495-22421910	0.0978135	0.0163703	-0.391742	-0.49606
CG4877.b(modencode)	chr3L:16379440-16383924	0.0916642	0.0111594	-0.391694	-0.591198
CG4877.c(modencode)	chr3L:16379440-16383924	0.0916674	0.0111601	-0.391692	-0.591209
CG4877.f(modencode)	chr3L:16379440-16383924	0.0916675	0.0111598	-0.391687	-0.5912
CG4877-RB(modencode)	chr3L:16379440-16383924	0.0916737	0.0111608	-0.391684	-0.591199
CG4877.a(modencode)	chr3L:16379430-16383924	0.0916738	0.0111614	-0.391678	-0.591209
CG1812.a(modencode)	chrX:20383249-20386859	0.167938	0.0325271	-0.391233	-0.519724
CG4877.e(modencode)	chr3L:16379602-16383924	0.0920872	0.0112768	-0.391055	-0.587671
scrib.e(modencode)	chr3R:22362564-22421910	0.0978477	0.016396	-0.39059	-0.496368
scrib-RA(modencode)	chr3R:22362023-22421910	0.0993295	0.0167003	-0.390215	-0.498685
CG1812-RA(modencode)	chrX:20382439-20386859	0.168249	0.0323317	-0.389958	-0.515015
scrib.b(modencode)	chr3R:22362960-22421910	0.0995934	0.0163421	-0.389593	-0.50024
CG4877.d(modencode)	chr3L:16379440-16383924	0.0924758	0.01116	-0.389556	-0.591205
CG13245-RA(modencode)	chr2L:16004325-16005511	0.0920363	0.13354	-0.389225	-0.682954
scrib.h(modencode)	chr3R:22362003-22422020	0.0995924	0.0162694	-0.389143	-0.501141
scrib.f(modencode)	chr3R:22362073-22421910	0.0996549	0.0163921	-0.389126	-0.500652
nc_20813.e(modencode)	chr4:926079-927982	0.104437	0.110733	-0.389013	-0.385449
sm.c(modencode)	chr2R:15416960-15519106	0.129423	0.0530982	-0.38888	-0.326994
sns.d(modencode)	chr2R:4685969-4743530	0.0175392	0.147574	-0.388449	-0.439102
sns.e(modencode)	chr2R:4685969-4743587	0.0175402	0.144831	-0.388443	-0.446426
sns.c(modencode)	chr2R:4685933-4743596	0.0175634	0.145702	-0.388392	-0.446811
Arp14D-RB(modencode)	chrX:16442074-16448025	0.0370554	0.039816	-0.387763	-0.414349
FucT6-RA(modencode)	chrX:11600522-11604030	0.163531	0.131741	-0.386714	-0.155148
CG4587-RC(modencode)	chr2L:15647420-15679284	0.101126	0.0462582	-0.386666	-0.293325
MRP-RE(modencode)	chr2L:12722277-12744809	0.0129301	0.0115665	-0.386663	-0.580435
Caki.p(modencode)	chr3R:17609131-17634446	0.137437	0.0450868	-0.386433	-0.543947
CG33934-RD(modencode)	chr3R:15868479-15874438	0.0615629	0.095977	-0.386305	-0.78018
CG33934-RE(modencode), Indy-2-RA(modencode)	chr3R:15868479-15874438	0.0615934	0.0960578	-0.386296	-0.779593
Taf5-RA(modencode)	chr2R:6764808-6767175	0.141729	0.173874	-0.386052	-0.363388
CG8486.q(modencode)	chr2L:8163078-8190185	0.0339293	0.0816002	-0.38549	-0.41344
Ppcs.c(modencode)	chr3R:14964776-14973904	0.10162	0.026026	-0.385436	-0.629204
Ppcs-RB(modencode), Ppcs.e(modencode)	chr3R:14964776-14973987	0.101622	0.026026	-0.385432	-0.629204
sm.h(modencode)	chr2R:15416861-15519106	0.130514	0.0395844	-0.384928	-0.404496
EloA.a(modencode)	chr3R:19077248-19080852	0.108281	0.0638158	-0.384546	-0.265903
EloA-RA(modencode)	chr3R:19077201-19080852	0.108435	0.0638214	-0.384119	-0.265897
EloA-RB(modencode)	chr3R:19077266-19080793	0.107843	0.0760947	-0.384058	-0.217291
br.r(modencode)	chrX:1502133-1558373	0.0734945	0.134927	-0.384031	-0.330421
MRP-RB(modencode)	chr2L:12722212-12744881	0.00920445	0.0119677	-0.383986	-0.576183
Arp14D.a(modencode)	chrX:16442247-16447985	0.0387205	0.0500777	-0.383908	-0.402963
CG4424-RA(modencode)	chr3R:15852209-15853749	0.158872	0.0922319	-0.383649	-0.325202
EloA.b(modencode)	chr3R:19077266-19080793	0.109031	0.0765805	-0.383586	-0.220092
Arp14D.b(modencode)	chrX:16442247-16447979	0.0385523	0.0497551	-0.383301	-0.402402
Arp14D.c(modencode)	chrX:16442247-16447979	0.0385522	0.0497553	-0.383301	-0.402401
Arp14D.d(modencode)	chrX:16442247-16447979	0.0385522	0.0497554	-0.383301	-0.4024
CG12851.b(modencode)	chr2R:20836170-20842004	0.100872	0.0137059	-0.383174	-0.66109
Arp14D.e(modencode)	chrX:16442247-16447979	0.0385621	0.0468411	-0.383133	-0.405849
CG12851.c(modencode)	chr2R:20836170-20842004	0.100946	0.0137059	-0.38307	-0.661089
br.i(modencode)	chrX:1502824-1557755	0.0732343	0.162133	-0.383056	-0.293956
Pkc53E.j(modencode)	chr2R:12809174-12831985	0.0903206	0.0296641	-0.382613	-0.565808
CG12851-RB(modencode)	chr2R:20836053-20842004	0.10121	0.0137317	-0.382387	-0.660697
CG12851.a(modencode)	chr2R:20836053-20842004	0.101209	0.0137314	-0.382386	-0.660696
ttv-RA(modencode)	chr2R:10413885-10472866	0.134383	0.0319056	-0.382359	-0.313992
spir-RC(modencode)	chr2L:20341852-20348387	0.0218862	0.0590715	-0.382162	-0.403882
Arp14D.f(modencode)	chrX:16442074-16448025	0.0388264	0.039631	-0.382015	-0.41309
Arp14D.g(modencode)	chrX:16442084-16448025	0.0388265	0.0396309	-0.382015	-0.41309
spir.e(modencode)	chr2L:20343218-20348386	0.0255778	0.0579453	-0.381719	-0.407169
spir.d(modencode)	chr2L:20343270-20348386	0.0261066	0.057923	-0.380601	-0.407193
nc_20813.a(modencode)	chr4:927428-928092	0.093329	0.14535	-0.380279	-0.402483
Caki.n(modencode)	chr3R:17609131-17634459	0.14305	0.0451202	-0.380278	-0.544074
CG8765-RB(modencode)	chr3L:19677038-19680450	0.0577694	0.163903	-0.380219	-0.121473
Caki.i(modencode)	chr3R:17609280-17634459	0.1431	0.0421341	-0.380161	-0.53853
CG33672-RA(modencode), CG33671-RA(modencode)	chr2R:8521668-8523666	0.124116	0.096924	-0.37958	-0.505643
CG8765-RA(modencode)	chr3L:19676988-19680485	0.0578556	0.161582	-0.379499	-0.122624
Eip93F-RB(modencode)	chr3R:17774822-17832525	0.101179	0.14791	-0.37935	-0.323189
sm.j(modencode)	chr2R:15417134-15434559	0.0270117	0.105314	-0.379334	-0.243217
CG34306-RA(modencode)	chr3R:752509-764551	0.100592	0.142292	-0.378712	-0.142988
Pkc53E.m(modencode)	chr2R:12812632-12831982	0.0895928	0.0289046	-0.378612	-0.572092
br.q(modencode)	chrX:1502824-1558900	0.0751621	0.0786315	-0.378307	-0.430481
Pkc53E.n(modencode)	chr2R:12812016-12832632	0.08231	0.0571118	-0.378243	-0.50878
KdelR.c(modencode)	chr2L:10426864-10428655	0.0999867	0.0350063	-0.37821	-0.22109
KdelR.b(modencode)	chr2L:10426646-10428655	0.0999873	0.0348703	-0.37821	-0.221311
sm.i(modencode)	chr2R:15417028-15434622	0.0276319	0.0333691	-0.377958	-0.337554
CG1812-RB(modencode)	chrX:20383836-20386855	0.1821	0.0325215	-0.377872	-0.519722
CG10660.b(modencode)	chr3L:12479746-12483943	0.174207	0.104707	-0.377524	-0.282851
CG10660.c(modencode)	chr3L:12479746-12483943	0.174209	0.104702	-0.377524	-0.282854
grk-RA(modencode)	chr2L:8431030-8433674	0.139136	0.0407621	-0.377434	-0.557905
Eip75B.d(modencode)	chr3L:17946135-18052748	0.113394	0.0359778	-0.37715	-0.445028
Caki.j(modencode)	chr3R:17609280-17633655	0.139734	0.0423534	-0.377071	-0.537204
ptr-RB(modencode)	chrX:2238971-2248298	0.1458	0.169375	-0.376788	-0.263785
CG9059-RD(modencode)	chrX:16863102-16881099	0.116025	0.0781319	-0.376769	-0.396089
CG8097-RA(modencode)	chrX:15477180-15479287	0.090574	0.144455	-0.376325	-0.346261
CG4294-RB(modencode)	chr2R:18487910-18493208	0.0268005	0.195104	-0.376158	-0.179488
CG4294.a(modencode)	chr2R:18487910-18493208	0.0267194	0.194836	-0.376146	-0.179505
MRP-RN(modencode)	chr2L:12722277-12744809	0.0125356	0.0117367	-0.375182	-0.581655
Ndg.b(modencode)	chr2R:6201238-6210416	0.183684	0.0461654	-0.375108	-0.605831
CG9009-MIP13254(modencode)	chrX:14828073-14845827	0.105731	0.1102	-0.375007	-0.184745
KdelR-RA(modencode)	chr2L:10426646-10428389	0.105032	0.0580098	-0.374281	-0.205276
CG30354-RA(modencode)	chr2R:4564708-4565166	0.0834602	0.177922	-0.37375	-1.25846
Paf-AHalpha.a(modencode)	chrX:15677995-15679633	0.0640485	0.167927	-0.373589	-0.24112
Atg7-RB(modencode)	chr2R:14507917-14512594	0.161665	0.0208503	-0.373314	-0.863402
CG33218-RA(modencode)	chrX:2224072-2224938	0.135543	0.0220707	-0.372921	-1.27834
Paf-AHalpha.b(modencode)	chrX:15678002-15679757	0.0649324	0.172131	-0.372815	-0.233586
Eaf.e(modencode)	chr2R:3285355-3295345	0.143494	0.130439	-0.372809	-0.199983
Ace.i(modencode)	chr3R:9053309-9084608	0.083641	0.197135	-0.372396	-0.179661
CG4587-RB(modencode)	chr2L:15647420-15659445	0.100238	0.0302856	-0.371989	-0.342287
CG13800.a(modencode)	chr3L:2387997-2409096	0.0755442	0.0537457	-0.371964	-0.303159
Paf-AHalpha.d(modencode)	chrX:15677995-15682437	0.0661323	0.168323	-0.371515	-0.241438
CG17359-RA(modencode)	chr3L:13990991-13992346	0.0696775	0.0462022	-0.371212	-0.432205
p130CAS-RG(modencode)	chr3L:160805-174655	0.0461592	0.00660913	-0.371179	-1.79103
p130CAS.b(modencode)	chr3L:160805-174984	0.0462193	0.00654555	-0.371054	-1.78606
p130CAS-RA(modencode)	chr3L:150857-174655	0.0462576	0.00666772	-0.370942	-1.79062
p130CAS.a(modencode)	chr3L:150857-174984	0.0463212	0.00660674	-0.370814	-1.78564
dpr12.a(modencode)	chr2R:1734099-1747693	0.0504494	0.0255548	-0.370795	-0.474181
Paf-AHalpha.c(modencode)	chrX:15678002-15682437	0.0670308	0.173569	-0.370742	-0.232833
CG17490.a(modencode)	chr2L:22430838-22434093	0.0662425	0.0207509	-0.370681	-0.620536
CG7058-RB(modencode)	chrX:18700547-18706104	0.0977521	0.197728	-0.370352	-0.310465
CG17816.g(modencode)	chr3R:3683597-3712462	0.0974476	0.109654	-0.370003	-0.302566
CG17816.i(modencode)	chr3R:3683597-3712462	0.097448	0.109655	-0.370003	-0.302561
MRP-RA(modencode)	chr2L:12722212-12744835	0.0151659	0.0121231	-0.369993	-0.577343
CG8549-RA(modencode)	chr3L:6745992-6747156	0.1786	0.0762552	-0.369842	-0.259255
nc_22561.a(modencode)	chrX:8259556-8261139	0.198514	0.0659277	-0.369715	-0.971563
CG8709.c(modencode)	chr2R:4024423-4033491	0.175942	0.0234984	-0.369548	-0.787342
msl-3-RB(modencode)	chr3L:7116352-7118655	0.0812858	0.0404172	-0.369489	-0.721013
ventrally-expressed-protein-D-RA(modencode)	chr2R:18296122-18296767	0.0960512	0.00711934	-0.369406	-1.60241
CG33298-RB(modencode)	chr2L:9495438-9520696	0.0150996	0.0364939	-0.367323	-0.182184
CG11163-RD(modencode)	chr2R:1662174-1670474	0.12845	0.125144	-0.366733	-0.087258
Gr39a-RC(modencode)	chr2L:21291974-21297686	0.171773	0.159873	-0.366722	-1.18172
CG42574-RA(modencode)	chr3R:612648-627445	0.0934758	0.108702	-0.36671	-0.278727
Paf-AHalpha-RA(modencode)	chrX:15677888-15679633	0.0694072	0.16032	-0.366563	-0.244343
twf-RA(modencode)	chr3R:9948380-9950199	0.108982	0.194762	-0.365987	-0.0998163
CG33298-RA(modencode)	chr2L:9495438-9520696	0.0153289	0.0359269	-0.365693	-0.184464
chr2R_11200326_11200570.0(modencode)	chr2R:11200326-11200570	0.151696	0.0654537	-0.365587	-0.20941
CG32594-RC(modencode)	chrX:14918467-14936093	0.0823748	0.132912	-0.365533	-0.202331
CG42574.a(modencode)	chr3R:612648-627445	0.0916469	0.105391	-0.363935	-0.283196
ptr-RC(modencode)	chrX:2238971-2248298	0.13614	0.162069	-0.363663	-0.268299
CG14164-RB(modencode), CG6709-RB(modencode)	chr3L:9886283-9887843	0.0792874	0.127197	-0.363599	-0.434699
dpr12.b(modencode)	chr2R:1734194-1747693	0.0498527	0.0259107	-0.363443	-0.47377
CG11163.a(modencode)	chr2R:1662192-1670395	0.123567	0.121276	-0.36341	-0.0914746
CG11163.e(modencode)	chr2R:1662218-1670360	0.122959	0.130713	-0.363216	-0.088972
Eaf.d(modencode)	chr2R:3285355-3295326	0.145186	0.132229	-0.363206	-0.200518
CG3114-RE(modencode)	chrX:162554-173667	0.0909122	0.0513632	-0.363174	-0.214785
CG17742-IP04662(modencode)	chr3L:7153404-7154951	0.132495	0.0288769	-0.362671	-0.95155
Paf-AHalpha-RB(modencode)	chrX:15677827-15679757	0.0712384	0.16103	-0.362295	-0.243819
CG5976.a(modencode)	chr3L:20467961-20471623	0.158672	0.0276598	-0.362274	-0.761055
plx-RA(modencode)	chr3R:1532355-1538566	0.144032	0.132262	-0.362232	-0.346302
toy.g(modencode)	chr4:1010349-1027737	0.0366938	0.0966122	-0.361981	-0.303165
CG3114-RC(modencode)	chrX:162523-173751	0.0909801	0.0534945	-0.361686	-0.212327
Paf-AHalpha.f(modencode)	chrX:15677827-15679613	0.0721161	0.161995	-0.361525	-0.242798
Paf-AHalpha.e(modencode)	chrX:15677827-15682437	0.0733015	0.162449	-0.360273	-0.243098
l(1)G0196.d_l(1)G0196.d(modencode)	chrX:21888929-21909747	0.0813518	0.0176665	-0.360071	-1.21125
pHCl-RC(modencode)	chr3L:15856519-15892020	0.0777962	0.0278194	-0.359863	-0.923451
Tsp42Ee.f(modencode)	chr2R:2903494-2905869	0.185108	0.100509	-0.359657	-0.205408
Paf-AHalpha.g(modencode)	chrX:15677827-15682437	0.0741724	0.162449	-0.359511	-0.243099
CG11163.c(modencode)	chr2R:1662229-1670360	0.126922	0.124657	-0.359384	-0.0862507
Tsp42Ee.i(modencode)	chr2R:2899753-2905869	0.185574	0.100357	-0.359353	-0.20427
CG32103.d(modencode)	chr3L:12395660-12407930	0.0254124	0.189276	-0.359058	-0.135202
CG34372-RC(modencode)	chr2R:19351816-19379520	0.0794864	0.0938006	-0.358723	-0.154113
CG14408-RA(modencode)	chrX:14721091-14726185	0.0555767	0.166478	-0.358554	-0.0662168
MRP-RI(modencode)	chr2L:12722212-12744835	0.0152988	0.0122965	-0.358486	-0.578568
CG33543-IP08311(modencode)	chr2L:1997102-2001538	0.198531	0.0901886	-0.358365	-0.324943
Tsp42Ee.g(modencode)	chr2R:2904226-2905869	0.187085	0.101078	-0.358067	-0.20485
CG3689-RB(modencode)	chr3L:9404013-9406735	0.11507	0.176931	-0.357715	-0.104964
CadN2-RB(modencode)	chr2L:17787897-17816961	0.0472855	0.129183	-0.357686	-0.122893
dpr16-RB(modencode)	chr3R:990975-995841	0.11221	0.0716631	-0.357641	-0.515984
Tsp42Ee.h(modencode)	chr2R:2904339-2905869	0.187067	0.100962	-0.357572	-0.205239
CG32103.b(modencode)	chr3L:12395601-12407955	0.0257971	0.187487	-0.35755	-0.137424
CG3345-RA(modencode)	chr2L:268943-271626	0.136829	0.0260409	-0.357413	-0.380012
l(1)G0196-RI_l(1)G0196-RI(modencode)	chrX:21888929-21909504	0.0823305	0.0177383	-0.356959	-1.2107
Tsp42Ee.d(modencode)	chr2R:2900062-2905869	0.186865	0.100893	-0.356724	-0.203312
Tsp42Ee.e(modencode)	chr2R:2899990-2905869	0.187054	0.100915	-0.35652	-0.203206
Tsp42Ee-RA(modencode)	chr2R:2899699-2905873	0.187252	0.100805	-0.356364	-0.203356
CG14408.a(modencode)	chrX:14721091-14726185	0.0567149	0.166613	-0.356246	-0.0666352
CG10737.e(modencode)	chr2R:15057645-15065748	0.127735	0.185411	-0.35563	-0.252233
CG5191.d(modencode)	chr3R:16396217-16398732	0.063715	0.198889	-0.355549	-0.101909
nc_928.a(modencode)	chr2L:4534809-4537680	0.133908	0.18234	-0.355532	-0.902787
Tsp42Ee.b(modencode)	chr2R:2899753-2905869	0.187276	0.100468	-0.355164	-0.203123
Takr86C-RA(modencode)	chr3R:6563305-6576549	0.115817	0.169306	-0.354819	-0.300184
ssp4.o(modencode)	chr2R:13407073-13413023	0.0982142	0.133565	-0.354401	-0.182224
RhoGAP100F-RC(modencode)	chr3R:27653725-27670978	0.176449	0.18906	-0.353704	-0.127
CG42260.v(modencode)	chr2R:18630640-18684742	0.183533	0.0853875	-0.353385	-0.714719
RhoGAP100F.n(modencode)	chr3R:27639000-27670966	0.163071	0.189526	-0.35332	-0.127204
RhoGAP100F.l(modencode)	chr3R:27639000-27670966	0.163072	0.189524	-0.353319	-0.127205
RhoGAP100F.m(modencode)	chr3R:27639000-27670966	0.163072	0.189524	-0.353318	-0.127205
Tsp42Ee.c(modencode)	chr2R:2900384-2905869	0.188782	0.100955	-0.353267	-0.203232
cwo.h(modencode)	chr3R:6214000-6226062	0.0386025	0.0307068	-0.353219	-0.775219
CG11163-RC(modencode)	chr2R:1662279-1670360	0.129451	0.123443	-0.353087	-0.0889471
CG42260.z(modencode)	chr2R:18630702-18684628	0.192183	0.105392	-0.352588	-0.638327
Ace.k(modencode)	chr3R:9052409-9084608	0.0979329	0.170434	-0.352255	-0.20339
CG1637-RB(modencode)	chrX:10767927-10771948	0.144926	0.0463187	-0.352241	-0.556148
CG10737.a(modencode)	chr2R:15057607-15065739	0.132464	0.188889	-0.352226	-0.243254
noncoding_19380-GH07007(modencode)	chr3R:22427636-22429773	0.0705737	0.00603789	-0.352095	-0.58309
spen.b(modencode)	chr2L:182845-203251	0.0258901	0.136223	-0.352064	-0.30219
spen.d(modencode)	chr2L:182845-203411	0.025912	0.126363	-0.351971	-0.302274
spen-RC(modencode)	chr2L:182820-203358	0.0258795	0.103219	-0.351954	-0.338282
CG1637.a(modencode)	chrX:10767933-10771840	0.144805	0.0463189	-0.351845	-0.556147
Pak-RA(modencode)	chr3R:2176628-2185974	0.150244	0.0483669	-0.351446	-0.343454
dpr12-RC(modencode)	chr2R:1734094-1747775	0.0566265	0.0299126	-0.351268	-0.468018
spen.c(modencode)	chr2L:162884-203358	0.0260347	0.127777	-0.350643	-0.298473
CG14971-RA(modencode)	chr3L:3468013-3471418	0.124728	0.0835868	-0.350537	-0.231432
fru.d(modencode)	chr3R:14241195-14371357	0.0760561	0.0162538	-0.349957	-1.22868
CG10481-RA(modencode)	chr2L:19890247-19892529	0.0137352	0.169569	-0.349934	-0.661727
rdx-RE(modencode)	chr3R:9793383-9809088	0.0601009	0.1211	-0.349819	-0.328307
GalNAc-T1.a(modencode)	chr2R:11399168-11403102	0.139711	0.130376	-0.349793	-0.328334
rdx.e(modencode)	chr3R:9793383-9809083	0.0601182	0.12114	-0.34978	-0.32819
GalNAc-T1-RA(modencode)	chr2R:11399168-11403215	0.139385	0.131853	-0.349722	-0.325286
not-RB(modencode)	chr3L:18611818-18615242	0.110799	0.0553416	-0.349243	-0.286765
RhoGAP100F.k(modencode)	chr3R:27653447-27670978	0.176405	0.188266	-0.349166	-0.127427
GalNAc-T1-RB(modencode)	chr2R:11399224-11403279	0.139223	0.131158	-0.349121	-0.328143
CG9837.a(modencode)	chr3R:4634321-4635920	0.0639566	0.0367233	-0.349058	-1.1661
CG32103.e(modencode)	chr3L:12395378-12407955	0.027573	0.165307	-0.348978	-0.159887
CG10147-RA(modencode)	chr3L:6479082-6481650	0.189341	0.176234	-0.348887	-0.246529
ssp4-RG(modencode)	chr2R:13407073-13409685	0.155112	0.113116	-0.348654	-0.221008
CG11163-RA(modencode)	chr2R:1662279-1670360	0.1312	0.103044	-0.348493	-0.0989373
CG10737.f(modencode)	chr2R:15057604-15065748	0.130784	0.185178	-0.348394	-0.247096
nc_20813.b(modencode)	chr4:926082-928092	0.116002	0.142914	-0.34825	-0.381614
CG42260.aw(modencode)	chr2R:18630304-18684742	0.188108	0.0525396	-0.347862	-0.868293
Tsp42Ee.j(modencode)	chr2R:2899699-2906733	0.192354	0.100923	-0.347854	-0.202164
CG14408.c(modencode)	chrX:14720829-14726185	0.0608678	0.026388	-0.347838	-0.148002
CG34441-RA(modencode), lmg-RA(modencode)	chr2L:8525663-8528618	0.193962	0.0184262	-0.347607	-0.434656
CG33543.a(modencode)	chr2L:1997100-2006447	0.185207	0.0900397	-0.347407	-0.316837
CG1120.a(modencode)	chr3L:3806683-3809090	0.093064	0.136894	-0.34739	-0.362082
CG33543-RC(modencode)	chr2L:1997102-2006307	0.185388	0.0900395	-0.347318	-0.316837
Sfp78E-RA(modencode)	chr3L:21676198-21677142	0.169604	0.014378	-0.34683	-0.790556
CG42260.ay(modencode)	chr2R:18630485-18684628	0.19643	0.0646523	-0.34669	-0.761127
dpr16-RA(modencode)	chr3R:976614-995849	0.0945517	0.0706091	-0.346245	-0.5095
CG14408-RB(modencode)	chrX:14720895-14724586	0.0563349	0.0259662	-0.346006	-0.149464
RhoGAP100F.p(modencode)	chr3R:27638317-27670966	0.162344	0.18932	-0.34582	-0.127279
RhoGAP100F.o(modencode)	chr3R:27638344-27670966	0.162344	0.189318	-0.34582	-0.127281
RhoGAP100F.c(modencode)	chr3R:27638314-27670966	0.162345	0.189322	-0.345819	-0.127277
CG14408.b(modencode)	chrX:14720829-14726185	0.0619594	0.025703	-0.345598	-0.148298
CG31012.d(modencode)	chr3R:26635017-26652281	0.0849945	0.0802633	-0.345555	-0.121774
toy.i(modencode)	chr4:1010349-1027994	0.0389519	0.0672459	-0.345143	-0.364372
Tango2-IP21164(modencode)	chrX:13511058-13513236	0.0936359	0.162864	-0.344812	-0.301999
CG1120-RA(modencode)	chr3L:3806667-3809090	0.0943152	0.136894	-0.344721	-0.362073
mrt.g(modencode)	chr3R:23102971-23107029	0.0911691	0.0305661	-0.344403	-0.530954
elk-RA(modencode)	chr2R:13761416-13814138	0.149119	0.0823808	-0.344316	-0.393865
CG14621.c(modencode)	chrX:21846497-21849035	0.179297	0.139431	-0.344155	-0.43505
CG18177-RB(modencode)	chr3L:9720004-9722750	0.121191	0.0442846	-0.34411	-0.366425
CG18177-RA(modencode)	chr3L:9720004-9722750	0.121192	0.0442849	-0.34411	-0.366424
CG14741.k(modencode)	chr3R:7893999-7903323	0.14686	0.13236	-0.343813	-0.193705
nc_8174.a(modencode)	chr2R:16477216-16479973	0.0714285	0.197887	-0.34379	-0.374636
CadN-RD(modencode)	chr2L:17649726-17739521	0.0403638	0.0856704	-0.343044	-0.291132
CadN-RB(modencode)	chr2L:17649726-17739521	0.0400949	0.085759	-0.342769	-0.290227
CG31012-RD(modencode)	chr3R:26643284-26652276	0.0945382	0.0806477	-0.342493	-0.122976
CadN-RF(modencode)	chr2L:17649726-17739521	0.0406995	0.0723026	-0.342344	-0.319197
CadN-RG(modencode)	chr2L:17649726-17739521	0.0409042	0.0686238	-0.342198	-0.324801
CadN.a(modencode)	chr2L:17649726-17739521	0.0409642	0.0714953	-0.341706	-0.321824
fru.a(modencode)	chr3R:14241195-14371010	0.0794895	0.017578	-0.341688	-1.2026
cwo.c(modencode)	chr3R:6213985-6226455	0.0443595	0.0750011	-0.34155	-0.544773
mrt.e(modencode)	chr3R:23102971-23106865	0.093852	0.0307375	-0.341432	-0.529214
CG10737.u(modencode)	chr2R:15057604-15065748	0.127782	0.185145	-0.341398	-0.252213
fs(2)ltoPP43-RB_fs(2)ltoPP43-RB(modencode)	chr2L:19793464-19795919	0.170173	0.109362	-0.34132	-0.214881
CadN.b(modencode)	chr2L:17649726-17739521	0.0408832	0.0679218	-0.341292	-0.326548
Tsp42Ee.a(modencode)	chr2R:2899753-2905869	0.197219	0.10585	-0.341117	-0.205819
CG10737.b(modencode)	chr2R:15057604-15065739	0.131524	0.185903	-0.341063	-0.252155
ssp4.b(modencode)	chr2R:13407073-13412673	0.118736	0.134282	-0.340903	-0.184351
pxb-RB(modencode)	chr3R:11491882-11514272	0.0755374	0.0294276	-0.340824	-0.703695
rdx.j(modencode)	chr3R:9793571-9797865	0.0952431	0.121603	-0.340811	-0.344022
Sec16-RE(modencode)	chrX:12490055-12503943	0.0743918	0.102328	-0.340796	-0.342305
CG17490-LD15658(modencode)	chr2L:22431022-22433329	0.0601524	0.0676191	-0.340708	-0.352969
CadN-RA(modencode)	chr2L:17649726-17739546	0.0407528	0.0814737	-0.340464	-0.29587
tai.f(modencode)	chr2L:9166800-9246447	0.0725024	0.196908	-0.340196	-0.205422
tai.e(modencode)	chr2L:9166800-9246450	0.0725548	0.181987	-0.340037	-0.222477
tai-RA(modencode)	chr2L:9166800-9246450	0.0725577	0.181979	-0.340035	-0.222458
tai.d(modencode)	chr2L:9166800-9246450	0.0722517	0.175712	-0.339694	-0.223967
cwo.d(modencode)	chr3R:6213851-6226477	0.0457835	0.0501214	-0.339548	-0.611662
CG11163.b(modencode)	chr2R:1662279-1670394	0.140367	0.116715	-0.339524	-0.0924925
rdx.a(modencode)	chr3R:9793674-9797520	0.0956857	0.124415	-0.339432	-0.344936
CG30410-MIP14626(modencode)	chr2R:19243330-19243964	0.193275	0.0594738	-0.339197	-0.326667
dpr12.e(modencode)	chr2R:1734099-1748278	0.0670305	0.02164	-0.338667	-0.477349
CG10737.s(modencode)	chr2R:15051612-15065748	0.133081	0.185578	-0.338135	-0.247115
CG10737.n(modencode)	chr2R:15051651-15065748	0.13308	0.185222	-0.338132	-0.247164
CG31012-RA(modencode)	chr3R:26648195-26652741	0.10056	0.0456712	-0.337419	-0.449391
CG10481-RB(modencode)	chr2L:19890247-19892529	0.0142225	0.0897402	-0.337223	-0.878252
tai.q(modencode)	chr2L:9227671-9247061	0.0726917	0.0126532	-0.336807	-1.04768
CG10737.c(modencode)	chr2R:15057604-15065739	0.129754	0.183107	-0.336641	-0.255356
CG10737.d(modencode)	chr2R:15057607-15065739	0.132532	0.188793	-0.336531	-0.24357
SK.n(modencode)	chrX:5234271-5297441	0.0333722	0.170245	-0.336463	-0.196784
cwo.e(modencode)	chr3R:6213853-6226458	0.0465811	0.0745075	-0.336436	-0.543606
rdx-RA(modencode)	chr3R:9793383-9797532	0.0990088	0.120103	-0.336027	-0.335652
rdx.b(modencode)	chr3R:9793383-9797520	0.0990742	0.120103	-0.335928	-0.335651
RhoGAP100F.j(modencode)	chr3R:27653447-27672028	0.169056	0.16389	-0.335866	-0.135049
rdx-RB(modencode)	chr3R:9793383-9857825	0.102686	0.120814	-0.335762	-0.332115
rdx.c(modencode)	chr3R:9793383-9857786	0.102687	0.120667	-0.335761	-0.332263
pHCl-RF(modencode)	chr3L:15844417-15892020	0.0560472	0.0110096	-0.335726	-0.75295
CG31012-RB(modencode)	chr3R:26648195-26652274	0.0899957	0.0272685	-0.335037	-0.279384
Ace.j(modencode)	chr3R:9052409-9085243	0.114974	0.174067	-0.33443	-0.201739
CG11727-RB(modencode)	chrX:11328712-11348391	0.0564684	0.0541791	-0.334109	-0.319964
CG9164-RC(modencode)	chrX:15274590-15279499	0.0345527	0.0423808	-0.334055	-0.426995
rdx-RC(modencode)	chr3R:9793674-9851681	0.0985787	0.125679	-0.333835	-0.341902
CadN-RE(modencode)	chr2L:17649608-17739521	0.0423293	0.0748455	-0.333641	-0.318847
CG10737-RO(modencode)	chr2R:15057604-15065754	0.130952	0.185086	-0.333568	-0.247409
tai.g(modencode)	chr2L:9238038-9246386	0.119774	0.104254	-0.333016	-0.430078
cwo-RA(modencode)	chr3R:6213655-6226558	0.0475157	0.0737302	-0.332948	-0.545101
RhoGAP100F.d(modencode)	chr3R:27638314-27672326	0.156171	0.0878635	-0.332719	-0.250682
RhoGAP100F.e(modencode)	chr3R:27638317-27672312	0.156171	0.0878631	-0.332719	-0.250679
CG10737.v(modencode)	chr2R:15057604-15065739	0.134886	0.185854	-0.332628	-0.247242
RhoGAP100F.r(modencode)	chr3R:27638314-27672532	0.15626	0.0878956	-0.332503	-0.250729
CG10737.x(modencode)	chr2R:15057604-15065739	0.130909	0.186681	-0.332368	-0.24599
rdx-RD(modencode)	chr3R:9793571-9851681	0.100651	0.123043	-0.332156	-0.340582
CG10737.o(modencode)	chr2R:15057645-15065748	0.131246	0.18469	-0.331922	-0.24773
Rbcn-3A.a(modencode)	chrX:6134877-6149626	0.194388	0.0563904	-0.331875	-0.44417
CG31012.e(modencode)	chr3R:26648195-26652754	0.103591	0.0500907	-0.331857	-0.431
dpr12.f(modencode)	chr2R:1734194-1748336	0.0666363	0.0218074	-0.331815	-0.513271
CG9164.a(modencode)	chrX:15274403-15279496	0.0353083	0.0412263	-0.331783	-0.429046
CG31012.c(modencode)	chr3R:26648084-26652754	0.10169	0.0411954	-0.331646	-0.463222
sm.a(modencode)	chr2R:15415987-15519106	0.125613	0.0345167	-0.331417	-0.433998
CG11727-RC(modencode)	chrX:11328712-11348372	0.0579471	0.0546492	-0.331379	-0.319503
neuroligin.c(modencode)	chr2L:6874911-6906681	0.140207	0.0497624	-0.331331	-0.372816
CadN2-RA(modencode)	chr2L:17787897-17812604	0.0563568	0.152521	-0.331294	-0.115539
sm.b(modencode)	chr2R:15415865-15519006	0.12587	0.0367782	-0.331181	-0.445903
sm.e(modencode)	chr2R:15415639-15519106	0.125979	0.0433241	-0.330645	-0.473214
CadN-RH(modencode)	chr2L:17649608-17739546	0.0426803	0.0678148	-0.330633	-0.340975
CadN-RC(modencode)	chr2L:17649608-17739546	0.0428798	0.0647742	-0.330567	-0.34653
mrt.c(modencode)	chr3R:23102971-23106437	0.100195	0.0305002	-0.330491	-0.531802
CdGAPr-RC(modencode)	chr2L:19776090-19791900	0.0796229	0.111707	-0.330373	-0.257141
zfh2.a(modencode)	chr4:523624-560418	0.01654	0.0811965	-0.330359	-0.312467
CG42260.ap(modencode)	chr2R:18630204-18685834	0.180971	0.0417202	-0.330328	-0.906522
CdGAPr-RB(modencode)	chr2L:19775913-19792026	0.0784125	0.0923122	-0.330284	-0.275194
CG42260.q(modencode)	chr2R:18630181-18685837	0.181007	0.0417658	-0.330261	-0.905153
CG31048.e(modencode)	chr3R:24670976-24696171	0.07826	0.0712289	-0.329949	-0.620002
CG9164-RB(modencode)	chrX:15274661-15277986	0.0408473	0.0465122	-0.32994	-0.429414
rdx.d(modencode)	chr3R:9793383-9851681	0.102316	0.121398	-0.329936	-0.332783
Gyc88E-RD(modencode)	chr3R:11009908-11016964	0.0332618	0.0683923	-0.329781	-0.620534
CG11462-RA(modencode)	chrX:5732198-5734846	0.146945	0.0780662	-0.328916	-0.380278
tai.h(modencode)	chr2L:9237943-9246386	0.126636	0.10314	-0.328798	-0.433438
CG10737.w(modencode)	chr2R:15057604-15065739	0.13301	0.183049	-0.32842	-0.25045
CG3114-RG(modencode)	chrX:162554-173667	0.109116	0.0390771	-0.328307	-0.254134
CG32397-RA(modencode)	chr3L:6556543-6577454	0.186543	0.0529767	-0.32815	-1.67048
dpr12.d(modencode)	chr2R:1734094-1748120	0.0711784	0.0276313	-0.328002	-0.455292
CG10737.m(modencode)	chr2R:15052965-15065748	0.130383	0.18368	-0.327907	-0.24869
bcn92-RA(modencode)	chrX:2042480-2043773	0.154879	0.184042	-0.327816	-0.135545
CadN.c(modencode)	chr2L:17649565-17739546	0.0438417	0.0774692	-0.327758	-0.328193
sle-RA(modencode)	chr3R:6159119-6164034	0.0550337	0.0972224	-0.32763	-0.30971
CG9164-RA(modencode)	chrX:15274655-15279479	0.0308447	0.0479812	-0.327538	-0.4208
sle-RB(modencode)	chr3R:6158735-6164034	0.0542782	0.0958525	-0.32751	-0.308324
ttv.a(modencode)	chr2R:10413885-10475336	0.0990181	0.0100805	-0.327452	-1.16201
CG6472.c(modencode)	chr2R:12768208-12772215	0.187903	0.0899793	-0.327295	-2.06287
Asx.b(modencode)	chr2R:10392489-10399951	0.0629545	0.110895	-0.327241	-0.202288
Asx.d(modencode)	chr2R:10391514-10399951	0.0627309	0.110791	-0.327173	-0.202019
CG3114.b(modencode)	chrX:162523-173751	0.109298	0.0406973	-0.326646	-0.251659
nc_7734.a(modencode)	chr2R:14177239-14193651	0.129401	0.0284658	-0.326613	-0.451519
mrt.b(modencode)	chr3R:23102971-23106460	0.103619	0.0307163	-0.326297	-0.530437
Exp6-RA(modencode)	chrX:365052-370799	0.0557984	0.0543349	-0.326273	-0.20834
Ge-1-RB(modencode)	chr2L:11095353-11100866	0.178082	0.0380755	-0.325849	-0.768779
zfh2-RA(modencode)	chr4:524374-560612	0.0177992	0.0581176	-0.325699	-0.394329
mrt.f(modencode)	chr3R:23102971-23107852	0.101301	0.0288806	-0.325469	-0.528916
mura.f(modencode)	chr3R:5362787-5377570	0.0861402	0.0165208	-0.325321	-0.473647
spen-RA(modencode)	chr2L:159040-203251	0.0273746	0.136976	-0.325285	-0.298442
spen-RB(modencode)	chr2L:159034-203358	0.0273859	0.127103	-0.325209	-0.297825
spen.e(modencode)	chr2L:159040-203411	0.0273942	0.126934	-0.325202	-0.298604
Lar-MIP16968(modencode)	chr2L:19715761-19725204	0.180323	0.0246936	-0.324966	-1.93973
spen.a(modencode)	chr2L:159040-203411	0.0274308	0.126782	-0.324852	-0.298046
dpr12.c(modencode)	chr2R:1734094-1748338	0.0730878	0.0217921	-0.324109	-0.513279
Eip75B-RB(modencode)	chr3L:17946458-18052863	0.0945461	0.064015	-0.323991	-0.408264
toy.f(modencode)	chr4:1010349-1028492	0.0451341	0.0354699	-0.323137	-0.396698
CG7059.e(modencode)	chr3R:18215323-18218084	0.176955	0.0924151	-0.323122	-0.213154
Pde9.d(modencode)	chrX:12685291-12725712	0.199006	0.0214155	-0.322779	-0.854581
CG8589-RA(modencode)	chr2R:10187604-10189946	0.0525767	0.00653803	-0.32272	-2.183
CG8589.b(modencode)	chr2R:10187604-10189946	0.0525758	0.00654054	-0.322719	-2.183
CG8589.a(modencode)	chr2R:10187604-10189946	0.0525775	0.00653803	-0.322718	-2.183
tai.n(modencode)	chr2L:9166800-9247061	0.068075	0.0112166	-0.322667	-1.01891
tai.m(modencode)	chr2L:9166800-9247061	0.068078	0.0112166	-0.322663	-1.0189
CG8594.a(modencode)	chr2R:8459617-8462813	0.100728	0.0107185	-0.322033	-0.308352
CG6852-RB(modencode)	chr3L:18862438-18863158	0.138457	0.0187239	-0.32201	-1.1624
mrt.a(modencode)	chr3R:23102971-23106151	0.102767	0.0306701	-0.321751	-0.52919
tra2-RE(modencode)	chr2R:10489509-10491426	0.0289389	0.0315851	-0.32124	-0.582237
CG4678.a(modencode)	chrX:16590166-16604583	0.154002	0.105492	-0.32119	-0.286344
mrt-RA(modencode)	chr3R:23102971-23107700	0.104405	0.0298238	-0.32076	-0.522205
CG6852-RA(modencode)	chr3L:18862330-18863158	0.139685	0.0187837	-0.320422	-1.15915
Ddr.c(modencode)	chr2L:6253123-6323174	0.117342	0.0320853	-0.320197	-0.46393
Cortactin-RA(modencode)	chr3R:16887397-16890282	0.175276	0.039252	-0.32013	-0.401907
alpha-Spec.b(modencode)	chr3L:1778484-1795319	0.143142	0.0135043	-0.319949	-0.374882
Cortactin.c(modencode)	chr3R:16887402-16890213	0.17594	0.0393549	-0.319742	-0.402247
Cortactin.a(modencode)	chr3R:16887402-16890213	0.175944	0.0393555	-0.319739	-0.402242
Cortactin.b(modencode)	chr3R:16887402-16890185	0.175947	0.039355	-0.319735	-0.402247
jog.d(modencode)	chrX:19727291-19746084	0.159504	0.0921668	-0.319422	-0.710147
CG15894.ad(modencode)	chrX:6210066-6223586	0.131448	0.052289	-0.31891	-0.288381
CG15894.i(modencode), CG15894.j(modencode)	chrX:6210019-6223586	0.131345	0.0515739	-0.318888	-0.289221
CG10466.a(modencode)	chr2L:19775475-19792846	0.0506917	0.179161	-0.318372	-0.353984
tai.j(modencode)	chr2L:9166800-9247175	0.0697627	0.0114018	-0.318246	-1.03498
mura.g(modencode)	chr3R:5362205-5377570	0.0903926	0.0478924	-0.317881	-0.328956
Alh-RB(modencode)	chr3R:2923406-2934148	0.10089	0.0339418	-0.317483	-0.427798
cwo.g(modencode)	chr3R:6214386-6226062	0.0506434	0.0323361	-0.317476	-0.783081
cwo.f(modencode)	chr3R:6214386-6226062	0.0506423	0.0324026	-0.317475	-0.783479
CG32397.a(modencode)	chr3L:6556297-6577454	0.190557	0.0530738	-0.317413	-1.55764
CG15236-RB(modencode)	chr2R:2715862-2725883	0.122904	0.0519642	-0.316957	-0.412665
Asx.a(modencode)	chr2R:10391420-10400014	0.0636445	0.111444	-0.316853	-0.204892
CG7059-RA(modencode)	chr3R:18215349-18218084	0.183539	0.102564	-0.316649	-0.18528
Asx.e(modencode)	chr2R:10391514-10399951	0.0634893	0.11185	-0.316633	-0.201292
Asx-RA(modencode)	chr2R:10391420-10400015	0.0635076	0.110216	-0.316586	-0.206152
ssp4.l(modencode)	chr2R:13406611-13413244	0.100536	0.105143	-0.315441	-0.165888
mrt.d(modencode)	chr3R:23102971-23109101	0.107118	0.0305109	-0.315287	-0.540486
CG6685-RA(modencode)	chr3L:9960284-9961451	0.128362	0.145866	-0.31528	-0.143002
neuroligin.a(modencode)	chr2L:6875424-6906681	0.150806	0.0530818	-0.315192	-0.36006
MESR4.a(modencode)	chr2R:13435282-13443745	0.0964381	0.132927	-0.314651	-0.188375
CG15236-RA(modencode)	chr2R:2715913-2725865	0.123707	0.0518934	-0.314625	-0.412765
Rbcn-3A.d(modencode)	chrX:6135059-6147287	0.15794	0.0368053	-0.314557	-0.254418
eIF4G2-RA(modencode)	chr3R:19635550-19644364	0.10303	0.0368056	-0.314555	-0.184665
unc-119-RA(modencode)	chrX:7182309-7185583	0.109623	0.174068	-0.314533	-0.168705
jog.l(modencode)	chrX:19726711-19746084	0.156492	0.0839491	-0.314507	-0.685929
CG15236.a(modencode)	chr2R:2715863-2725865	0.123458	0.0519439	-0.314506	-0.412759
CG15236.b(modencode)	chr2R:2716104-2725865	0.125467	0.0519623	-0.314267	-0.413069
MESR4-RB(modencode)	chr2R:13435226-13443794	0.0965615	0.1344	-0.314077	-0.189931
Pkc53E.o(modencode)	chr2R:12812449-12832595	0.11638	0.0569246	-0.314039	-0.506783
jog.a(modencode)	chrX:19726745-19746110	0.1569	0.0836468	-0.314023	-0.687997
tai.c(modencode)	chr2L:9176358-9246386	0.0913727	0.0298204	-0.313734	-0.112978
Pak.i(modencode)	chr3R:2182033-2185772	0.185048	0.13294	-0.313605	-0.188384
e(y)1-RA_e(y)1-RA(modencode)	chrX:17736152-17737384	0.148756	0.126068	-0.313405	-0.159097
CG9780-RA(modencode)	chr3R:117953-120610	0.154745	0.14458	-0.312956	-0.585297
Ace.g(modencode)	chr3R:9051829-9084608	0.138679	0.168411	-0.312785	-0.203039
CG8443-RA(modencode)	chr2R:12074080-12081777	0.131049	0.108793	-0.31251	-0.226958
Eaf.g(modencode)	chr2R:3285098-3295345	0.171852	0.0856233	-0.312139	-0.296444
mub.a(modencode)	chr3L:21837888-21919325	0.084167	0.109827	-0.311717	-0.360101
CG34430-RA(modencode)	chr2R:3830947-3831980	0.0977005	0.167384	-0.311663	-0.453667
Su(z)12-RB_Su(z)12-RB(modencode)	chr3L:19911343-19916682	0.191162	0.0963113	-0.311334	-0.248028
nc_8958.a(modencode)	chr2R:19588760-19589865	0.0880909	0.0219195	-0.311216	-0.980019
Eaf.j(modencode)	chr2R:3285098-3295349	0.171872	0.0854695	-0.310647	-0.295769
Fsn.a(modencode)	chr2R:9108416-9109996	0.122566	0.125712	-0.30999	-0.135908
CG14741.j(modencode)	chr3R:7894103-7903198	0.159416	0.16885	-0.309903	-0.164219
Eaf.f(modencode)	chr2R:3285098-3295326	0.169856	0.0853709	-0.309678	-0.296275
tai.b(modencode)	chr2L:9176358-9246386	0.0932685	0.0236674	-0.308789	-0.109003
CG31530-RA(modencode)	chr3R:576129-598919	0.100966	0.116666	-0.308789	-0.268878
na.b(modencode)	chrX:14160374-14171003	0.196737	0.0776386	-0.308787	-0.321837
CG8443.a(modencode)	chr2R:12075591-12081777	0.13249	0.115049	-0.308729	-0.226094
mura.e(modencode)	chr3R:5361848-5377566	0.0928349	0.0368324	-0.308478	-0.408107
CadN.g(modencode)	chr2L:17649423-17739521	0.0497128	0.107068	-0.308328	-0.3135
mura.d(modencode)	chr3R:5361838-5377570	0.0964075	0.0367274	-0.308186	-0.408634
CG8594-RA(modencode)	chr2R:8459511-8462845	0.109733	0.00843604	-0.307965	-0.319753
Su(z)12-RA_Su(z)12-RA(modencode)	chr3L:19911337-19916674	0.191591	0.100271	-0.30783	-0.240989
CG10737-RE(modencode)	chr2R:15051652-15065746	0.138535	0.186745	-0.307691	-0.244797
Cbp80-RB(modencode)	chrX:4544000-4552292	0.151229	0.0509953	-0.307628	-0.639758
Fsn-RB(modencode)	chr2R:9108416-9109852	0.124073	0.124985	-0.307527	-0.136463
dlg1-RO(modencode)	chrX:11267086-11283324	0.0780224	0.0758792	-0.307284	-0.441784
CG16972.a(modencode)	chr2L:13197092-13203282	0.114919	0.159753	-0.307196	-0.20682
CG16972-RA(modencode)	chr2L:13197092-13203295	0.114926	0.182021	-0.307193	-0.181689
CG4996-RA(modencode)	chr2R:13627341-13631554	0.118677	0.107805	-0.306272	-0.273504
CG31530.b(modencode)	chr3R:576129-599121	0.10242	0.117151	-0.305972	-0.268201
ssp4.h(modencode)	chr2R:13406611-13409685	0.149996	0.096655	-0.30572	-0.179984
CG10737.g(modencode)	chr2R:15051653-15065748	0.136913	0.18381	-0.305483	-0.248912
dlg1-RC(modencode)	chrX:11263670-11283324	0.0820694	0.0735108	-0.304809	-0.434044
MESR4.c(modencode)	chr2R:13436315-13443732	0.103704	0.132341	-0.304761	-0.185777
MESR4-RA(modencode)	chr2R:13436315-13443742	0.103709	0.133479	-0.304754	-0.184914
nAcRalpha-34E-RF(modencode)	chr2L:14040171-14089437	0.120727	0.026028	-0.304633	-0.465108
CG10737.i(modencode)	chr2R:15051653-15065748	0.137279	0.183807	-0.304599	-0.248917
jog.f(modencode)	chrX:19725978-19746110	0.159392	0.0854594	-0.304396	-0.547754
Patr-1.a(modencode)	chr3R:12868936-12873444	0.116935	0.0517084	-0.304385	-0.617222
dlg1.g(modencode)	chrX:11263670-11283324	0.0826291	0.0758919	-0.304331	-0.43072
CG14741.h(modencode)	chr3R:7894057-7903198	0.154217	0.137568	-0.303745	-0.188879
mop-RA(modencode)	chr3L:14762424-14769334	0.100149	0.0192028	-0.303474	-0.640511
CG31998.h(modencode)	chr4:218005-222462	0.0657754	0.166373	-0.303403	-0.276464
CG42389-RD(modencode)	chr2L:16545033-16597641	0.104946	0.11091	-0.303068	-0.415475
CG9795-RD(modencode)	chr3R:145388-152150	0.121954	0.0710446	-0.303034	-0.24078
CG10478.a(modencode)	chr3L:6000515-6004216	0.174358	0.0597272	-0.302232	-0.469689
CG12129-RA(modencode)	chr2R:5920781-5922337	0.11664	0.0997649	-0.302184	-0.248955
CG9795.d(modencode), CG9795-RC(modencode)	chr3R:145372-152072	0.121672	0.0718212	-0.302162	-0.242361
CG5091-RA(modencode)	chr2L:10380000-10382865	0.112868	0.0784963	-0.301987	-0.494223
CG9795.c(modencode)	chr3R:145372-152054	0.121787	0.0740327	-0.301953	-0.238432
CG9795-RB(modencode)	chr3R:145384-152099	0.122814	0.0715909	-0.301906	-0.242516
tai.o(modencode)	chr2L:9238038-9247061	0.10486	0.00888035	-0.301843	-1.29311
CG9795.b(modencode)	chr3R:145372-152254	0.121362	0.0685433	-0.301812	-0.244061
pHCl-RE(modencode)	chr3L:15844417-15892020	0.0690709	0.0104646	-0.301612	-0.755228
CG9795.e(modencode)	chr3R:145372-152240	0.121847	0.0685449	-0.301608	-0.243763
nAcRalpha-34E-RB(modencode)	chr2L:14040131-14089543	0.124096	0.0256607	-0.30156	-0.46571
ssp4.m(modencode)	chr2R:13406611-13412782	0.118936	0.10492	-0.301422	-0.16678
mop.a(modencode)	chr3L:14762438-14769243	0.102137	0.0192123	-0.301188	-0.640205
CG8949-RA(modencode)	chrX:16963051-16972000	0.0811439	0.174414	-0.300857	-0.249171
CG34453-RB(modencode)	chr3L:232480-233391	0.128136	0.118588	-0.30028	-0.830269
Rab35.b(modencode)	chrX:20049840-20053923	0.0917601	0.0165841	-0.300035	-0.21068
CG6006.f(modencode)	chr3R:11980704-11997492	0.149333	0.108726	-0.299729	-0.372471
CG4133.b(modencode)	chr2L:455543-458746	0.174886	0.071438	-0.299681	-0.156969
Tango2.a(modencode)	chrX:13511023-13513248	0.0988733	0.121802	-0.299596	-0.365025
CG4133.c(modencode)	chr2L:455499-458746	0.175082	0.0714387	-0.299517	-0.156966
CG4133.a(modencode)	chr2L:455524-458748	0.175081	0.0714412	-0.299516	-0.156964
CG4133-RA(modencode)	chr2L:455499-458775	0.175083	0.0683751	-0.299516	-0.159186
EcR.a(modencode)	chr2R:1979761-2044631	0.119806	0.161513	-0.298907	-0.105791
ssp4.n(modencode)	chr2R:13406611-13412521	0.126634	0.103381	-0.298453	-0.168318
pHCl-RG(modencode)	chr3L:15844417-15892020	0.0699234	0.0102729	-0.298443	-0.759752
tai.p(modencode)	chr2L:9237943-9247061	0.110533	0.00881856	-0.297813	-1.29445
CG32062.b(modencode)	chr3L:10499468-10584241	0.108651	0.0792569	-0.297763	-0.327307
VhaM9_7-1-RA(modencode)	chr3L:4186018-4186816	0.0437935	0.0956511	-0.297424	-0.266737
CG6006-RC(modencode)	chr3R:11981040-11997492	0.15164	0.108669	-0.297204	-0.373748
CG34449.h(modencode)	chrX:9220207-9248708	0.104057	0.0299457	-0.296831	-0.316866
CG34449.l(modencode)	chrX:9218656-9248708	0.0747929	0.0290313	-0.296793	-0.777753
MB8.chr3L.pasa.58.a(modencode)	chr3L:21251090-21251859	0.149354	0.155795	-0.296758	-1.05813
CG1600-RC(modencode)	chr2R:3413534-3416854	0.0203379	0.0229216	-0.296685	-0.479266
tou.a(modencode)	chr2R:7465983-7503336	0.0814183	0.194609	-0.296429	-0.12772
CG34449.i(modencode)	chrX:9220207-9248706	0.104508	0.045953	-0.296137	-0.244304
CG31864-RA(modencode)	chr2L:11995738-11996548	0.181602	0.150457	-0.295625	-0.200354
mub-RC(modencode)	chr3L:21872638-21919325	0.0974215	0.109631	-0.295565	-0.360352
CG31012.f(modencode)	chr3R:26634189-26652742	0.129845	0.061273	-0.295337	-0.144771
Mapmodulin.b(modencode)	chr2R:13753683-13760243	0.186883	0.087303	-0.294858	-0.0716454
Mapmodulin-RA(modencode)	chr2R:13753683-13759776	0.186936	0.0652362	-0.294768	-0.0853875
Mapmodulin.a(modencode), Mapmodulin-RD(modencode)	chr2R:13753698-13759515	0.187154	0.0732456	-0.2944	-0.0821451
mub.l(modencode)	chr3L:21837888-21919801	0.0941815	0.0831832	-0.294312	-0.554102
dre4-RA(modencode)	chr3L:1871528-1876399	0.19717	0.116779	-0.294174	-0.467835
tra2.c(modencode)	chr2R:10489509-10491865	0.0297528	0.0336407	-0.294089	-0.578473
CG33692-RA(modencode), CG33691-RA(modencode)	chrX:6770108-6774552	0.0824528	0.185086	-0.293971	-0.320267
CG7369.c(modencode)	chr3L:22735164-22741718	0.150424	0.0325206	-0.293906	-0.52638
CG7369-RA(modencode)	chr3L:22735164-22741718	0.150424	0.0325207	-0.293905	-0.526377
wapl-RA(modencode)	chrX:2044023-2053086	0.109237	0.101277	-0.293812	-0.356672
Patr-1-RA(modencode)	chr3R:12869274-12873622	0.120043	0.0540972	-0.293763	-0.613042
CadN.h(modencode)	chr2L:17649350-17739521	0.0591254	0.0909797	-0.29364	-0.348378
CG14741.g(modencode)	chr3R:7894057-7908600	0.167395	0.134923	-0.293594	-0.19118
CG14741.m(modencode)	chr3R:7894057-7908502	0.167389	0.133942	-0.293498	-0.191916
CG15894.n(modencode), CG15894.o(modencode)	chrX:6210019-6223988	0.153151	0.0806985	-0.293488	-0.722301
CG1600-RB(modencode)	chr2R:3413623-3416766	0.0220654	0.0237301	-0.293319	-0.47838
CG7369.e(modencode)	chr3L:22734812-22741718	0.150026	0.0324987	-0.293184	-0.527542
CG7369.d(modencode)	chr3L:22734812-22741718	0.150025	0.0324974	-0.293181	-0.527543
tra2-RD(modencode)	chr2R:10489509-10491395	0.0563547	0.0310318	-0.29295	-0.582333
ave-RA(modencode)	chr2R:10639964-10640816	0.116703	0.0380113	-0.292943	-0.205687
CG15894.k(modencode)	chrX:6210066-6223957	0.153829	0.0811944	-0.292858	-0.721172
CG15894.m(modencode), CG15894.l(modencode)	chrX:6210019-6223957	0.153708	0.0811357	-0.292854	-0.721514
TORC.b(modencode)	chr3L:17654724-17661304	0.135739	0.0154107	-0.292597	-1.46551
CG7369.a(modencode)	chr3L:22734976-22741716	0.156197	0.0328731	-0.292568	-0.523419
CG31522-RA(modencode)	chr3R:267080-276593	0.027328	0.0866158	-0.292461	-0.365302
CG31522.a(modencode)	chr3R:267137-276555	0.0271713	0.0871107	-0.292375	-0.365267
CG7369.b(modencode)	chr3L:22735051-22741716	0.156565	0.0319093	-0.291669	-0.526827
tai.l(modencode)	chr2L:9176358-9247061	0.0761999	0.00948402	-0.291482	-0.855008
Pp2C1.a(modencode)	chrX:4573887-4581004	0.140427	0.0557186	-0.291478	-0.369022
EcR-RB(modencode)	chr2R:1979778-2019479	0.0950304	0.163805	-0.290849	-0.141586
CG4495-RA(modencode)	chr2L:7182097-7185533	0.0767911	0.180256	-0.290745	-0.201685
5-HT1B-RA(modencode)	chr2R:14910419-14916482	0.111437	0.0512274	-0.290594	-0.276731
cora-RB(modencode)	chr2R:15116551-15131257	0.117471	0.0320542	-0.290517	-0.896496
CG42238-MIP17806(modencode)	chr2L:20969322-21052164	0.112521	0.020983	-0.290431	-1.07054
CG4495-RB(modencode)	chr2L:7182097-7185533	0.0786604	0.184298	-0.290313	-0.196191
5-HT1B-RB(modencode)	chr2R:14910419-14916482	0.111757	0.0550621	-0.290301	-0.273025
Asx.c(modencode)	chr2R:10392007-10399951	0.0835176	0.110943	-0.290233	-0.202591
cora.c(modencode)	chr2R:15116551-15131257	0.117723	0.0320494	-0.290172	-0.896943
CG31522-RD(modencode)	chr3R:267137-276555	0.020122	0.0867935	-0.290099	-0.3656
neuroligin-RA(modencode)	chr2L:6896794-6906661	0.193766	0.0567114	-0.289317	-0.342791
Pp2B-14D-RA(modencode)	chrX:16450797-16454056	0.150222	0.180735	-0.289271	-0.224357
CG10383-RA(modencode)	chr2L:18690839-18695614	0.192648	0.113446	-0.288721	-0.213551
neuroligin.b(modencode)	chr2L:6896184-6906661	0.194656	0.0568555	-0.288322	-0.342634
CG15267-RA(modencode)	chr2L:15248818-15253609	0.176548	0.10884	-0.28796	-0.441242
CG1090.b(modencode)	chr3R:185436-192231	0.117438	0.00492631	-0.28764	-2.48957
tai.k(modencode)	chr2L:9176358-9247061	0.0780188	0.0094853	-0.286912	-0.844622
Cirl.i(modencode)	chr2R:4503377-4512295	0.0845741	0.117504	-0.286745	-0.226205
tra2-RA(modencode)	chr2R:10489509-10491936	0.0830935	0.0323081	-0.286655	-0.581002
Rph-RB(modencode)	chrX:10643110-10651699	0.170533	0.15821	-0.286576	-0.24063
Blimp-1.g(modencode)	chr3L:5638311-5642405	0.150866	0.0414011	-0.286501	-0.472243
Cirl.e(modencode)	chr2R:4503377-4512346	0.0859263	0.124812	-0.28636	-0.215524
PMCA.a(modencode)	chr4:349646-379312	0.0283987	0.188086	-0.286215	-0.0382944
CG31522.c(modencode)	chr3R:267080-279917	0.022605	0.0945917	-0.286191	-0.325923
MED1.c(modencode)	chr3L:21621425-21627563	0.196738	0.0207605	-0.285901	-0.474931
CG17271.a(modencode)	chr3R:16644884-16647659	0.16596	0.141569	-0.28535	-0.281547
CG32062.a(modencode)	chr3L:10577873-10584004	0.130115	0.129837	-0.285171	-0.274089
tra2-RF(modencode)	chr2R:10489509-10491873	0.0871957	0.0322421	-0.285118	-0.580553
dpr18.a(modencode)	chrX:15957735-15964337	0.115087	0.0366102	-0.285046	-0.532184
dpr18-RA(modencode)	chrX:15957774-15964337	0.115087	0.03661	-0.285045	-0.532183
C3G.b(modencode)	chrX:6675449-6697613	0.0318668	0.0438208	-0.284548	-0.428243
CG31522.d(modencode)	chr3R:267080-279466	0.0218801	0.0885134	-0.284412	-0.350142
CG33218.a(modencode)	chrX:2223645-2224938	0.184938	0.0286543	-0.284277	-1.10826
l(3)neo38.g_l(3)neo38.g(modencode)	chr3R:7592161-7604995	0.167876	0.0120751	-0.283842	-0.509363
scrib.g(modencode)	chr3R:22381305-22421910	0.111422	0.013459	-0.283809	-0.537397
l(3)neo38.h_l(3)neo38.h(modencode)	chr3R:7592161-7604370	0.167936	0.0121103	-0.283803	-0.509378
CG3288.a(modencode)	chr3L:20829245-20830296	0.19715	0.184188	-0.283529	-0.408874
Cpr51A.a(modencode)	chr2R:10400047-10403226	0.159996	0.0116517	-0.283299	-1.39459
CG31522.b(modencode), CG31522-RB(modencode)	chr3R:267080-279315	0.0222791	0.0876072	-0.283172	-0.355022
lilli-RG(modencode)	chr2L:2890171-2953077	0.0121382	0.0898732	-0.283146	-0.0959896
CG42268-RH(modencode)	chr3L:9727112-9744676	0.155481	0.0647968	-0.282903	-0.232626
PMCA-RJ(modencode)	chr4:349350-379376	0.0291628	0.024344	-0.282693	-0.123589
PMCA.i(modencode)	chr4:349350-379664	0.0291835	0.024437	-0.282632	-0.123558
mub.o(modencode)	chr3L:21868357-21919801	0.107628	0.0832865	-0.28259	-0.554577
PMCA.h(modencode)	chr4:349098-379312	0.0291948	0.0245305	-0.282536	-0.123115
cora-RC(modencode)	chr2R:15116570-15131256	0.127693	0.0327886	-0.282047	-0.934698
cora-RE(modencode)	chr2R:15116570-15131256	0.125216	0.0303631	-0.282001	-1.0142
cora.f(modencode)	chr2R:15116570-15131256	0.127986	0.0327829	-0.281694	-0.935169
CG42526-RA(modencode)	chr3L:9426786-9428582	0.184528	0.189011	-0.281688	-0.418717
C3G-RC(modencode)	chrX:6675449-6697579	0.0313803	0.0439213	-0.281284	-0.428353
C3G-RH(modencode)	chrX:6675449-6697579	0.0311588	0.0441345	-0.28123	-0.427799
tra2.b(modencode)	chr2R:10489509-10491839	0.0878706	0.032242	-0.281173	-0.580552
mub.n(modencode)	chr3L:21838267-21919801	0.107078	0.0832621	-0.281168	-0.554546
Ndae1.i(modencode)	chr2L:7226442-7232050	0.131562	0.0635414	-0.280232	-0.519544
tra2-RB(modencode)	chr2R:10489509-10491865	0.0882911	0.0321875	-0.279659	-0.584528
tra2.a(modencode)	chr2R:10489509-10491865	0.0882901	0.0321874	-0.27965	-0.584528
mub.i(modencode)	chr3L:21855163-21919801	0.110193	0.0833422	-0.279595	-0.554509
CadN.d(modencode)	chr2L:17649288-17739546	0.0697901	0.0908781	-0.27956	-0.349322
Tango2-RA(modencode)	chrX:13510968-13513282	0.109978	0.105129	-0.279554	-0.398634
nahoda-MIP15335(modencode)	chr2R:18799774-18804237	0.158046	0.197586	-0.279518	-0.134271
CadN.e(modencode)	chr2L:17649288-17739546	0.0698217	0.0923257	-0.279303	-0.345189
E(bx).a_E(bx).a(modencode)	chr3L:233870-246984	0.0261637	0.0701558	-0.27927	-0.285084
CG7139-RB(modencode)	chr3L:22060344-22063538	0.110139	0.162313	-0.279084	-0.166985
tlk.c(modencode)	chrX:3614066-3682012	0.118559	0.122137	-0.278901	-0.32976
hts-RH(modencode)	chr2R:15296264-15298863	0.107982	0.11803	-0.278819	-0.182864
mub.r(modencode)	chr3L:21896028-21919801	0.111325	0.0833742	-0.278774	-0.554504
ref(2)P.a_ref(2)P.a(modencode)	chr2L:19542382-19545548	0.191419	0.013195	-0.278768	-0.452183
mub.q(modencode)	chr3L:21900269-21919801	0.111386	0.0833745	-0.278724	-0.554474
CG12414-RE06164(modencode)	chr3L:23199770-23277307	0.189141	0.0157594	-0.278704	-0.639613
mub.k(modencode)	chr3L:21871925-21919801	0.107464	0.0832405	-0.278693	-0.553313
Sur-8-LP05663(modencode)	chr3R:13222388-13227098	0.103617	0.00669949	-0.27859	-2.54803
mub.j(modencode)	chr3L:21871925-21919801	0.107481	0.0832467	-0.278518	-0.553409
mub.s(modencode)	chr3L:21872638-21919739	0.108349	0.0807206	-0.27813	-0.552985
mub.f(modencode)	chr3L:21871925-21919801	0.108322	0.0832405	-0.27808	-0.553314
ref(2)P-RA_ref(2)P-RA(modencode)	chr2L:19542382-19545552	0.191443	0.0132021	-0.277939	-0.452166
E(bx)-RE_E(bx)-RE[[10]](modencode)	chr3L:233870-246984	0.0267734	0.0701706	-0.277853	-0.283993
CG6900-RB(modencode)	chrX:18679792-18680243	0.16488	0.0293156	-0.277791	-0.455911
Fsn-RA(modencode)	chr2R:9108444-9109964	0.143974	0.123939	-0.277765	-0.136285
E(bx).b_E(bx).b(modencode)	chr3L:233914-246984	0.0268484	0.0698719	-0.277711	-0.284765
E(bx)-RA_E(bx)-RA(modencode)	chr3L:233870-246991	0.0268485	0.0700353	-0.277689	-0.284536
E(bx)-RB_E(bx)-RB(modencode)	chr3L:233870-246991	0.0268488	0.0700355	-0.277689	-0.284532
mub.h(modencode)	chr3L:21871925-21919850	0.108377	0.083201	-0.277628	-0.552866
mub.g(modencode)	chr3L:21871925-21919850	0.108388	0.0832012	-0.277616	-0.552866
mub.e(modencode)	chr3L:21871925-21919850	0.108388	0.0832021	-0.277616	-0.552957
milt.a(modencode), milt-RC(modencode)	chr2L:7037965-7056012	0.145961	0.141103	-0.277242	-0.224874
Rbp1-RD(modencode)	chr3R:6610075-6612229	0.0674989	0.189591	-0.277139	-0.110169
tef-RA(modencode)	chr2R:12942031-12944362	0.101962	0.0972884	-0.276915	-0.43207
mub-RA(modencode)	chr3L:21871925-21919879	0.108497	0.0833672	-0.276495	-0.552186
CG31998.i(modencode)	chr4:218005-226552	0.0837313	0.167858	-0.276404	-0.267378
CG31998.e(modencode)	chr4:218103-226564	0.0837272	0.180907	-0.276392	-0.24683
CG31998.g(modencode)	chr4:217950-226662	0.0837232	0.157822	-0.276016	-0.276884
CG31998.d(modencode)	chr4:217959-226662	0.0837287	0.159332	-0.275998	-0.275037
CG31998.f(modencode)	chr4:217950-226564	0.0837223	0.157048	-0.275992	-0.277655
mub-RB(modencode)	chr3L:21872710-21919801	0.110064	0.0832215	-0.275981	-0.554392
CG42238.a(modencode)	chr2L:20965386-21052212	0.0748284	0.0653187	-0.275395	-0.438681
mub.m(modencode)	chr3L:21871925-21919801	0.109778	0.083323	-0.275267	-0.553487
ref(2)P-RB_ref(2)P-RB(modencode)	chr2L:19542640-19545548	0.190268	0.0130867	-0.275139	-0.451813
CG15894.f(modencode)	chrX:6211427-6223988	0.162208	0.0803284	-0.275053	-0.721953
scaf6-RB(modencode)	chr3L:17033027-17035659	0.109689	0.0601899	-0.274914	-0.508371
CG15894.h(modencode)	chrX:6211427-6223957	0.162876	0.0807643	-0.274446	-0.721172
Trf4-1.d(modencode)	chrX:8454504-8462076	0.19949	0.15631	-0.274401	-0.455038
nAcRalpha-34E-RD(modencode)	chr2L:14040171-14089543	0.159582	0.0242137	-0.274385	-0.501972
CG10103.d(modencode)	chr3L:6747103-6749631	0.127588	0.121621	-0.274324	-0.245244
CG42261.f(modencode)	chr3R:21795774-21807949	0.173413	0.149244	-0.274147	-0.154631
Patr-1.b(modencode)	chr3R:12869274-12874143	0.134566	0.0343872	-0.273965	-0.938445
CG17816.q(modencode)	chr3R:3682375-3712462	0.14035	0.032881	-0.27384	-0.543597
CG1090-RA(modencode)	chr3R:185436-192577	0.128264	0.00325823	-0.273739	-2.49907
CG1090.a(modencode)	chr3R:185436-192577	0.128265	0.00325823	-0.273738	-2.49907
CG31998.j(modencode)	chr4:217357-226662	0.0849644	0.0870357	-0.273595	-0.749746
larp-RE(modencode)	chr3R:24143891-24152113	0.0578645	0.0988363	-0.273591	-0.272684
Gyc88E.e(modencode)	chr3R:10977681-11016964	0.0559489	0.068457	-0.273578	-0.617967
CG1090-RB(modencode)	chr3R:185436-192577	0.128945	0.00327796	-0.273407	-2.49973
CG1090.c(modencode)	chr3R:185436-192601	0.129022	0.00327796	-0.273401	-2.49972
larp-RB(modencode)	chr3R:24143896-24154005	0.0583529	0.0991181	-0.273323	-0.27256
CG12125.a(modencode)	chrX:8327995-8330959	0.152596	0.100228	-0.273306	-0.146484
larp-RA(modencode)	chr3R:24143896-24152010	0.0583085	0.0989214	-0.273205	-0.272702
larp.a(modencode)	chr3R:24143896-24156749	0.0582541	0.0990946	-0.273128	-0.272404
CG12125-RA(modencode)	chrX:8327920-8330959	0.152389	0.101082	-0.273121	-0.14596
Fmr1-RA(modencode)	chr3R:5927121-5935931	0.089759	0.125575	-0.27295	-0.403645
Fmr1-RC(modencode)	chr3R:5927121-5935960	0.0897601	0.125574	-0.272949	-0.403646
Fmr1-RD(modencode)	chr3R:5927121-5934988	0.0910473	0.125461	-0.271908	-0.403248
CG1109-RB(modencode)	chr3R:1486359-1491168	0.072012	0.013235	-0.271633	-1.01976
CG10737.r(modencode)	chr2R:15057645-15065739	0.151537	0.172093	-0.271395	-0.251046
5-HT1B.a(modencode)	chr2R:14910164-14916482	0.125901	0.0308158	-0.270824	-0.312102
CG42238-RA(modencode)	chr2L:20965520-21052130	0.0755844	0.0684361	-0.270821	-0.425761
unk.a(modencode)	chr3R:18978760-18983601	0.0800222	0.0437357	-0.270756	-0.532977
CG42238-GM06547(modencode)	chr2L:20965520-21051954	0.0754531	0.0684212	-0.270555	-0.425975
milt.b(modencode)	chr2L:7049926-7056012	0.121625	0.152886	-0.270451	-0.216039
hep-RC(modencode)	chrX:12976619-12984472	0.134835	0.122505	-0.270382	-0.37842
tra2-RC(modencode)	chr2R:10489509-10491880	0.0492963	0.0329457	-0.270128	-0.579019
PMCA.f(modencode)	chr4:350852-379312	0.0337525	0.0616556	-0.269946	-0.142402
CG30387.g(modencode)	chr2R:17186746-17197916	0.176124	0.169306	-0.269687	-0.220618
hep.c(modencode)	chrX:12976161-12984472	0.141251	0.124443	-0.269665	-0.36468
Task6.c(modencode)	chr3R:9493037-9497823	0.0973103	0.0483128	-0.268919	-0.272793
CG42268-RF(modencode)	chr3L:9727021-9744777	0.174452	0.0666173	-0.268604	-0.22918
CG2991-RB(modencode)	chr2L:2857159-2868601	0.120953	0.0325732	-0.268451	-0.28351
PMCA-RM(modencode)	chr4:351372-379385	0.0352065	0.132713	-0.26845	-0.168741
larp-RD(modencode)	chr3R:24143891-24162400	0.0617569	0.0986201	-0.268327	-0.271106
C3G.d(modencode)	chrX:6674790-6697613	0.0371611	0.0539841	-0.268248	-0.439683
CG42268.c(modencode)	chr3L:9727112-9744676	0.177048	0.0664278	-0.268194	-0.22922
CG3114.c(modencode)	chrX:162542-170410	0.10297	0.0538217	-0.267811	-0.210104
CG10737.q(modencode)	chr2R:15057645-15065739	0.155678	0.161996	-0.267464	-0.263704
CG42268.b(modencode)	chr3L:9727111-9744728	0.177027	0.0665082	-0.267428	-0.229335
CG17816.p(modencode)	chr3R:3682375-3712724	0.147871	0.0329708	-0.26729	-0.544032
CG2991-RA(modencode)	chr2L:2857159-2868601	0.120931	0.0324028	-0.266893	-0.283651
CG1674.o(modencode)	chr4:252055-264510	0.0868962	0.0865293	-0.266824	-0.575313
C3G.f(modencode)	chrX:6674692-6697579	0.0364375	0.0550167	-0.26523	-0.439663
C3G.g(modencode)	chrX:6674894-6697579	0.0367548	0.0542838	-0.265153	-0.437455
Abi-RA(modencode)	chr3R:9944981-9948188	0.0722024	0.116368	-0.265117	-0.249638
Abi-RB(modencode)	chr3R:9944982-9948138	0.0722039	0.116367	-0.265116	-0.249639
Abi.a(modencode)	chr3R:9944982-9948153	0.0722339	0.115915	-0.264979	-0.250103
Eip75B.e(modencode)	chr3L:17946049-18052863	0.166964	0.0199471	-0.264185	-0.619721
CG15894.g(modencode)	chrX:6211497-6223957	0.174512	0.0808144	-0.264042	-0.721621
unk.e(modencode)	chr3R:18978760-18982825	0.0812658	0.0405283	-0.263844	-0.543245
CG1674.e(modencode)	chr4:252027-265206	0.0932988	0.099953	-0.263247	-0.523206
CG9009-RA(modencode)	chrX:14827946-14844938	0.187641	0.0757723	-0.262959	-0.220754
CG12734-RA(modencode)	chr3L:3178934-3185290	0.0707391	0.090797	-0.262391	-0.230065
Fmr1-RF(modencode)	chr3R:5927265-5934108	0.0998209	0.129562	-0.262203	-0.411301
CG12734-RB(modencode)	chr3L:3178934-3185290	0.0705914	0.0911938	-0.262166	-0.232009
tlk-RH(modencode)	chrX:3614049-3682088	0.123791	0.119724	-0.2614	-0.348392
CG10737.j(modencode)	chr2R:15057645-15065739	0.160037	0.158124	-0.261381	-0.26869
CG10737.p(modencode)	chr2R:15057645-15065739	0.160045	0.158122	-0.261379	-0.268692
CG4911.b(modencode)	chr3L:9061571-9065911	0.121236	0.19491	-0.26107	-0.174362
CG4911.d(modencode)	chr3L:9060244-9065911	0.172556	0.197823	-0.261032	-0.142498
CG4911.c(modencode)	chr3L:9060244-9066040	0.172562	0.197009	-0.261025	-0.143161
scrib.a(modencode)	chr3R:22394324-22421910	0.136601	0.0147733	-0.260775	-0.553386
Fmr1-RE(modencode)	chr3R:5927121-5934108	0.101265	0.12539	-0.260467	-0.418194
Rgk3.a(modencode)	chr2R:17143323-17166504	0.097828	0.0916945	-0.260014	-1.05943
GATAd.a(modencode)	chr2L:10333704-10338698	0.184578	0.179975	-0.259572	-0.121215
Shaw.e(modencode)	chr2L:3718144-3728979	0.131159	0.0647125	-0.259038	-0.236058
tlk-RE(modencode)	chrX:3618670-3682088	0.13114	0.189729	-0.258808	-0.267386
CLIP-190.b(modencode)	chr2L:17386137-17404641	0.142466	0.199241	-0.25848	-0.186727
Adar.c(modencode)	chrX:1667754-1675253	0.056516	0.154573	-0.258266	-0.136851
Cap-H2.a(modencode)	chr3R:6586898-6592478	0.074756	0.0221886	-0.257915	-0.518108
Shaw.d(modencode)	chr2L:3718144-3729093	0.132279	0.0638436	-0.257784	-0.251292
dup-RA(modencode)	chr2R:11264049-11268475	0.122183	0.179134	-0.257494	-0.128629
cora.e(modencode)	chr2R:15122601-15131256	0.161022	0.032843	-0.257309	-0.93515
Ada2b-RA(modencode)	chr3R:4062799-4066321	0.1043	0.12236	-0.256663	-0.177882
GATAd-RA(modencode)	chr2L:10333665-10338734	0.1874	0.165466	-0.256445	-0.131578
PpD3-RA(modencode)	chr3R:5573597-5576822	0.110855	0.11006	-0.256078	-0.141772
PpD3-RB(modencode)	chr3R:5573624-5576822	0.110858	0.110346	-0.256075	-0.141442
Cap-H2-RD(modencode)	chr3R:6587494-6592478	0.0805189	0.0226187	-0.255841	-0.516568
Octbeta2R.h(modencode)	chr3R:8377741-8387596	0.14735	0.18879	-0.255696	-0.173109
Vti1-RA(modencode)	chr3L:691481-693019	0.162557	0.00948404	-0.255488	-0.51884
Ada2b-RB(modencode)	chr3R:4062810-4066321	0.102505	0.117487	-0.25536	-0.174294
CG1674.d(modencode)	chr4:252055-265206	0.0931984	0.0885832	-0.255181	-0.572562
CG3114-RD(modencode)	chrX:162554-173667	0.146606	0.0483583	-0.254645	-0.216823
pHCl.a(modencode)	chr3L:15843963-15892020	0.105876	0.0135661	-0.254409	-1.20997
CG11151-RA(modencode)	chrX:13633637-13635241	0.149352	0.1755	-0.254223	-0.220718
pHCl-RD(modencode)	chr3L:15844417-15892020	0.113821	0.0099595	-0.25406	-0.766181
CG32062.c(modencode)	chr3L:10509091-10584241	0.152256	0.0732752	-0.253379	-0.336578
nc_15421.a(modencode)	chr3R:4638584-4639180	0.192399	0.0517721	-0.25275	-1.87602
CG9123-RA(modencode)	chrX:15234364-15236144	0.185715	0.0893819	-0.252706	-0.122923
CG32062-RF(modencode)	chr3L:10509091-10584069	0.158901	0.108388	-0.25184	-0.286469
X11L.d(modencode)	chrX:17493635-17500133	0.093975	0.0172572	-0.250918	-0.266772
X11L.i(modencode)	chrX:17493644-17500133	0.0932337	0.0173879	-0.250783	-0.266344
CG4393.c(modencode)	chr3R:19201899-19210631	0.150126	0.0745737	-0.250714	-0.183745
lid-RA(modencode)	chr2L:5990340-5999872	0.176659	0.0216569	-0.25025	-0.899748
sm.f(modencode)	chr2R:15415639-15434559	0.0763602	0.0476956	-0.25017	-0.500827
X11L.e(modencode)	chrX:17493618-17500209	0.0920879	0.022885	-0.250151	-0.300512
CG10737-RS(modencode)	chr2R:15051652-15065728	0.156352	0.170573	-0.250132	-0.252852
sm.l(modencode)	chr2R:15415934-15434622	0.0781476	0.0384847	-0.249697	-0.471848
CG3631.a(modencode)	chr3R:10705163-10708348	0.141996	0.0223229	-0.249611	-0.311903
CG3631-RD(modencode)	chr3R:10705163-10708348	0.142006	0.0223265	-0.249596	-0.311899
lid.d(modencode)	chr2L:5990340-6000113	0.17717	0.0216022	-0.249516	-0.89982
CG3631.c(modencode)	chr3R:10705058-10708348	0.141082	0.0206579	-0.249435	-0.313851
CG3631.b(modencode)	chr3R:10705058-10708348	0.141085	0.0206559	-0.249432	-0.313868
zfh2-IP22195(modencode)	chr4:522460-545270	0.046247	0.192163	-0.249193	-0.267799
CG17816.l(modencode)	chr3R:3682380-3712617	0.188265	0.0371037	-0.248245	-0.515197
elav.g(modencode)	chrX:409162-417443	0.17476	0.197303	-0.247826	-0.139824
CG32594-RB(modencode)	chrX:14918380-14936093	0.177631	0.123124	-0.247591	-0.201175
X11L.g(modencode)	chrX:17494554-17500133	0.0942362	0.0174136	-0.247305	-0.266308
Octbeta2R.g(modencode)	chr3R:8377628-8387267	0.141518	0.146653	-0.247276	-0.23803
X11L.h(modencode)	chrX:17494386-17500209	0.0928452	0.0233384	-0.247145	-0.299547
PMCA.c(modencode)	chr4:349646-379312	0.0411769	0.181723	-0.246883	-0.0352396
PMCA.b(modencode)	chr4:349646-379312	0.040951	0.149356	-0.24688	-0.0416599
Sras-RA(modencode)	chr3L:5556780-5558203	0.146976	0.161922	-0.246637	-0.301717
CG42268-RD(modencode)	chr3L:9727021-9753513	0.190552	0.0664661	-0.246542	-0.229843
PMCA-RK(modencode)	chr4:349442-379312	0.04142	0.0259406	-0.246383	-0.120714
PMCA-RI(modencode)	chr4:349442-379312	0.0411986	0.0284658	-0.246375	-0.124129
PMCA-RL(modencode)	chr4:349442-379531	0.0413388	0.0285299	-0.246291	-0.124042
PMCA.g(modencode)	chr4:349442-379818	0.0414206	0.0284213	-0.246117	-0.124095
fdl.d(modencode)	chr2R:8375250-8380445	0.143048	0.101594	-0.245874	-0.210698
l(3)neo38.i_l(3)neo38.i(modencode)	chr3R:7590577-7604995	0.169741	0.0340213	-0.245581	-0.387563
l(3)neo38.q_l(3)neo38.q(modencode)	chr3R:7590624-7604995	0.169923	0.0340111	-0.245474	-0.387517
l(3)neo38.j_l(3)neo38.j(modencode)	chr3R:7590635-7604370	0.169978	0.0340939	-0.245441	-0.387507
CG17816.m(modencode)	chr3R:3682380-3712435	0.189657	0.033667	-0.245428	-0.548314
Cap-H2-RE(modencode)	chr3R:6586871-6592490	0.0641732	0.0817865	-0.245177	-0.323215
Cap-H2.d(modencode)	chr3R:6586898-6592490	0.0641748	0.0817852	-0.245176	-0.323212
CLIP-190.f(modencode)	chr2L:17389297-17404651	0.160474	0.160859	-0.245105	-0.238555
noncoding_15421-MIP16110(modencode)	chr3R:4638503-4639301	0.174902	0.0289418	-0.245075	-1.43416
Cap-H2-RF(modencode)	chr3R:6586871-6592490	0.0641623	0.0818607	-0.245025	-0.323674
CG4393.b(modencode)	chr3R:19201642-19210631	0.15695	0.0554324	-0.24494	-0.260597
MIP07458(modencode)	chr2L:8083885-8084154	0.0373109	0.0115348	-0.244875	-0.790382
CG17816.k(modencode)	chr3R:3682380-3712435	0.190523	0.0337248	-0.244776	-0.548394
dpr4-RB(modencode)	chr3R:7359205-7368700	0.190692	0.131181	-0.244592	-0.178033
Sxl-RS(modencode)	chrX:6978197-6992068	0.157323	0.125037	-0.244427	-0.271965
CLIP-190-RJ(modencode)	chr2L:17389297-17404667	0.163636	0.16018	-0.24431	-0.240114
CLIP-190.c(modencode)	chr2L:17389297-17404667	0.163726	0.160433	-0.244131	-0.239633
CG8290-RA(modencode)	chr2R:7858127-7865261	0.174336	0.13869	-0.24383	-0.127724
CG16718-RA(modencode)	chr3R:15459104-15468466	0.163941	0.0479376	-0.243777	-0.33608
CG8671.c(modencode)	chr2L:21262961-21282105	0.041909	0.0332158	-0.243264	-0.388667
ftz-f1-RA(modencode)	chr3L:18744868-18757902	0.175594	0.0678528	-0.243094	-0.307758
tay.b(modencode)	chrX:15770417-15781361	0.0410736	0.13043	-0.24293	-0.144284
ftz-f1.f(modencode)	chr3L:18744868-18758023	0.176457	0.0660894	-0.24252	-0.312328
Octbeta2R.e(modencode)	chr3R:8377174-8387267	0.144757	0.148897	-0.242398	-0.198379
elav.l(modencode)	chrX:408881-417443	0.181637	0.150287	-0.242379	-0.205171
CG32062-RG(modencode)	chr3L:10509102-10584124	0.152513	0.110444	-0.242332	-0.291367
fdl-RB(modencode)	chr2R:8375250-8378900	0.145219	0.101664	-0.242232	-0.211006
elav.a(modencode)	chrX:408749-417443	0.1819	0.152294	-0.242223	-0.212599
X11L-RA(modencode)	chrX:17493618-17500264	0.09708	0.0272612	-0.24222	-0.303645
fdl.a(modencode)	chr2R:8375250-8394861	0.140735	0.100002	-0.242103	-0.209928
CG8949.a(modencode)	chrX:16962812-16971913	0.132982	0.106123	-0.241913	-0.379711
fdl.c(modencode)	chr2R:8375250-8378819	0.146513	0.101806	-0.241357	-0.210714
hep.b(modencode)	chrX:12977444-12984472	0.188879	0.140443	-0.241316	-0.361378
CG9947.b(modencode)	chrX:16332593-16335368	0.117829	0.179485	-0.241217	-0.107799
fdl-RC(modencode)	chr2R:8375191-8394891	0.148012	0.0814953	-0.241169	-0.221381
enc.a(modencode)	chr3L:3825682-3841208	0.147808	0.0756633	-0.241099	-0.340914
CG3631-RC(modencode)	chr3R:10705178-10708353	0.147426	0.0224257	-0.240779	-0.31915
shot.c(modencode)	chr2R:9751730-9829042	0.0497146	0.0594994	-0.240521	-0.270601
CG1600-RA(modencode)	chr2R:3413568-3420622	0.0297909	0.0248396	-0.2399	-0.474004
CG6650-RA(modencode)	chr3L:14024556-14027754	0.177025	0.0738608	-0.239675	-0.206823
CLIP-190-RO(modencode)	chr2L:17384915-17404667	0.139254	0.181549	-0.239603	-0.195388
Hsf-SD02833(modencode)	chr2R:14017808-14022108	0.194531	0.0932674	-0.239274	-0.193202
CG8671.f(modencode)	chr2L:21262961-21282370	0.0512125	0.0205404	-0.239097	-0.529445
enc.b(modencode)	chr3L:3818852-3841208	0.155995	0.0756796	-0.239036	-0.34307
enc.c(modencode)	chr3L:3828997-3841208	0.153046	0.0757179	-0.239028	-0.342477
CG31678-RC(modencode)	chr2L:20659128-20664444	0.121652	0.0957113	-0.238822	-0.296952
CG2225-RF(modencode)	chr2L:21663806-21671513	0.1488	0.0918405	-0.238773	-0.416899
CG3114.d(modencode)	chrX:162542-170438	0.118191	0.0539843	-0.238192	-0.209355
shot.d(modencode)	chr2R:9751742-9789975	0.0570566	0.0589267	-0.237438	-0.275643
tay.c(modencode)	chrX:15770417-15781331	0.0404418	0.133781	-0.237308	-0.144165
Hsf-RC(modencode)	chr2R:14017735-14022262	0.196449	0.0868871	-0.236805	-0.200861
CG10103.c(modencode)	chr3L:6747103-6749631	0.148454	0.136859	-0.23678	-0.227317
CG8671.d(modencode)	chr2L:21263344-21282105	0.0500935	0.0331388	-0.23665	-0.391306
Hsf-RB(modencode)	chr2R:14017735-14022181	0.196959	0.0872248	-0.236569	-0.201383
Hsf-RA(modencode)	chr2R:14017735-14022262	0.197164	0.0873031	-0.236554	-0.201144
Hsf-RD(modencode)	chr2R:14017735-14022140	0.196164	0.0868097	-0.236502	-0.2011
CG31678-RB(modencode)	chr2L:20659128-20676010	0.135074	0.0970789	-0.236404	-0.295129
enc-RE(modencode)	chr3L:3818664-3841392	0.152683	0.0893646	-0.236233	-0.303502
CG2991.a(modencode)	chr2L:2863187-2868553	0.172284	0.0336776	-0.235957	-0.281337
enc-RA(modencode)	chr3L:3818649-3841392	0.153491	0.0896435	-0.235631	-0.303358
enc-RB(modencode)	chr3L:3818649-3841392	0.153511	0.0896435	-0.235615	-0.303359
kis-RB(modencode)	chr2L:210732-222044	0.0723672	0.0808216	-0.235513	-0.354707
kis.b(modencode)	chr2L:210732-221959	0.072399	0.0807984	-0.235483	-0.354482
kis.c(modencode)	chr2L:210732-221959	0.0724312	0.0808832	-0.235467	-0.354411
CG8671.e(modencode)	chr2L:21262961-21282370	0.0531326	0.0205437	-0.235347	-0.528299
shot-RP(modencode)	chr2R:9751742-9798442	0.0739634	0.0670224	-0.235313	-0.251654
elav.i(modencode)	chrX:409162-417443	0.187475	0.155373	-0.235232	-0.176768
GluClalpha.n(modencode)	chr3R:15556410-15595607	0.115603	0.192606	-0.235177	-0.11725
fdl.b(modencode)	chr2R:8375250-8392213	0.152574	0.101231	-0.235139	-0.211288
Pi4KIIalpha-MIP20792(modencode)	chr3R:1383383-1389342	0.191635	0.0718465	-0.234978	-0.357626
kis-RC(modencode)	chr2L:210732-250851	0.0554519	0.0848748	-0.234649	-0.306286
CG6709-RA(modencode)	chr3L:9886283-9886990	0.184049	0.105417	-0.234526	-0.585289
kis.a(modencode)	chr2L:210732-250813	0.0557192	0.0848279	-0.234317	-0.306636
GluClalpha.p(modencode)	chr3R:15556467-15595607	0.11589	0.194043	-0.233882	-0.117539
Plc21C.f(modencode)	chr2L:305902-348002	0.186121	0.155658	-0.233773	-0.138199
Plc21C.e(modencode)	chr2L:305902-348002	0.186344	0.15551	-0.233727	-0.138268
CG3114.f(modencode)	chrX:162523-170482	0.128235	0.0540289	-0.233552	-0.208782
CG3114.e(modencode)	chrX:162542-170482	0.128241	0.0540296	-0.23355	-0.208782
elav.h(modencode)	chrX:409162-414553	0.192571	0.152416	-0.232949	-0.176294
Cip4.f(modencode)	chr3L:4322491-4364453	0.0868274	0.157881	-0.232802	-0.177924
Fas1-RF(modencode)	chr3R:12450942-12465501	0.0980362	0.136254	-0.232277	-0.215242
Fas1.c(modencode)	chr3R:12450948-12465493	0.0982625	0.136281	-0.232142	-0.215229
Fas1-RE(modencode)	chr3R:12450942-12465501	0.0982627	0.136287	-0.23214	-0.215215
Fas1.d(modencode)	chr3R:12450948-12465493	0.0985687	0.13655	-0.231923	-0.21473
kis-RA(modencode)	chr2L:210732-250849	0.0596937	0.0800509	-0.231913	-0.316904
Fas1.b(modencode)	chr3R:12455252-12465493	0.0990386	0.136427	-0.231827	-0.21505
Fas1.a(modencode)	chr3R:12450948-12465493	0.0987941	0.136583	-0.231786	-0.214704
Plc21C.i(modencode)	chr2L:310200-348002	0.194919	0.155202	-0.231697	-0.13814
cul-4-RA(modencode)	chr2R:3989765-3993839	0.149253	0.0536261	-0.231276	-0.33099
CG9363-RB(modencode)	chr3R:5283201-5286456	0.193043	0.0973176	-0.231232	-0.594628
cul-4-RB(modencode)	chr2R:3989765-3993839	0.149602	0.0537553	-0.230705	-0.331379
CLIP-190.t(modencode)	chr2L:17384724-17404640	0.150319	0.183577	-0.230076	-0.196102
CG30387-RI(modencode)	chr2R:17183178-17197916	0.189407	0.136235	-0.229961	-0.286871
elav.n(modencode)	chrX:408881-417443	0.194473	0.125322	-0.229778	-0.239856
elav.c(modencode)	chrX:408749-417443	0.194743	0.128411	-0.229624	-0.247285
CG42238-RB(modencode)	chr2L:20965520-20968943	0.123195	0.0684727	-0.229328	-0.432396
CG5746.a(modencode)	chr3R:20171497-20174555	0.176427	0.0989798	-0.229112	-0.405795
Dystrophin.p(modencode)	chr3R:15394839-15423113	0.0935955	0.0187	-0.22911	-0.396875
CG5746.d(modencode)	chr3R:20171497-20174593	0.17677	0.100082	-0.228988	-0.402992
CG5746.c(modencode)	chr3R:20171507-20174509	0.176933	0.0995722	-0.228977	-0.402967
CG5746-RD(modencode)	chr3R:20171501-20174593	0.176512	0.0989124	-0.228877	-0.40524
CG5746-RA(modencode)	chr3R:20171497-20174555	0.177084	0.0989814	-0.228816	-0.405791
CG8671.g(modencode)	chr2L:21263344-21282370	0.0626195	0.0214138	-0.228769	-0.531669
CG5746.b(modencode)	chr3R:20171507-20174509	0.177167	0.0995718	-0.228677	-0.402965
CG5746-RC(modencode)	chr3R:20171490-20174610	0.177061	0.100196	-0.22836	-0.402826
CG5746-RB(modencode)	chr3R:20171490-20174549	0.177634	0.100194	-0.228298	-0.402822
CG2991-RC(modencode)	chr2L:2862524-2868601	0.174974	0.036972	-0.227933	-0.262784
elav.m(modencode)	chrX:408919-414553	0.199961	0.117805	-0.227631	-0.237348
CdGAPr-RA(modencode)	chr2L:19775103-19792026	0.164249	0.0375791	-0.227564	-0.3981
CadN2.a(modencode)	chr2L:17787848-17827783	0.144986	0.139938	-0.227493	-0.143412
LpR1-RK(modencode)	chr3R:21567070-21586044	0.1986	0.158549	-0.227067	-0.175865
CG8671-RC(modencode)	chr2L:21262909-21282641	0.0590502	0.036361	-0.227011	-0.698764
shot-RN(modencode)	chr2R:9751742-9829615	0.0791657	0.0669752	-0.226843	-0.2517
CG33558.a(modencode)	chr2R:2813196-2850604	0.0602092	0.11756	-0.226243	-0.200425
shot-RJ(modencode)	chr2R:9751742-9829615	0.0798732	0.0615094	-0.226187	-0.269282
shot-RC(modencode)	chr2R:9751742-9798442	0.078098	0.0597698	-0.225827	-0.271606
shot.b(modencode)	chr2R:9751730-9798451	0.0781548	0.0597798	-0.225775	-0.271678
snoRNA:Psi28S-3385a-RA(modencode)	chr3R:1422082-1422231	0.176999	0.191188	-0.224294	-0.508928
HP5.b(modencode)	chrX:11348824-11350656	0.182507	0.0606032	-0.223989	-0.518812
CadN.j(modencode)	chr2L:17647048-17739521	0.157663	0.17024	-0.223899	-0.243232
CadN.f(modencode)	chr2L:17647048-17739521	0.158815	0.169793	-0.223504	-0.24957
CadN.i(modencode)	chr2L:17647048-17739546	0.15731	0.170347	-0.223078	-0.244268
CG33691-RC(modencode)	chrX:6770108-6774552	0.174561	0.184027	-0.222979	-0.320612
unk.b(modencode)	chr3R:18978760-18983592	0.104648	0.0426349	-0.222692	-0.541544
shot.a(modencode)	chr2R:9751730-9803236	0.0788792	0.0597912	-0.22244	-0.27176
CG3114-RH(modencode)	chrX:162544-173667	0.196267	0.0363914	-0.221112	-0.255888
ymp-RA(modencode), ymp.e(modencode)	chr3R:21417184-21435110	0.178123	0.160872	-0.220923	-0.604706
shot-RB(modencode)	chr2R:9751730-9829639	0.0816904	0.0602773	-0.219815	-0.270449
shot-RI(modencode)	chr2R:9751742-9829615	0.0826759	0.0601802	-0.219663	-0.270048
GluClalpha.a(modencode)	chr3R:15556681-15595607	0.137413	0.194182	-0.219312	-0.115594
Fer2LCH-RC(modencode)	chr3R:26214785-26216322	0.177084	0.109615	-0.218976	-0.288337
lid.b(modencode)	chr2L:5989849-5999496	0.182164	0.0108881	-0.218884	-0.70324
CG11138.f(modencode)	chrX:12464599-12477254	0.120338	0.0384138	-0.21855	-0.42308
Fer2LCH.c(modencode)	chr3R:26214535-26216316	0.177739	0.109417	-0.218522	-0.288705
CG6422.a(modencode)	chr3R:20859866-20864561	0.150571	0.179097	-0.218489	-0.185426
CG11138.g(modencode)	chrX:12464599-12477254	0.120681	0.0386172	-0.218309	-0.422938
GluClalpha-RA(modencode)	chr3R:15556681-15595607	0.137833	0.195594	-0.218046	-0.115896
Fer2LCH-RB(modencode)	chr3R:26213998-26216419	0.176348	0.109317	-0.217089	-0.288718
gig-RA(modencode)	chr3L:20122266-20132455	0.159423	0.081531	-0.217079	-0.252486
faf.f(modencode)	chr3R:27602724-27616640	0.136108	0.0769395	-0.216973	-0.18582
faf.g(modencode)	chr3R:27602733-27616624	0.136143	0.0778991	-0.21695	-0.185254
Adar-RC(modencode)	chrX:1667754-1678102	0.0972767	0.115428	-0.216561	-0.155093
shot.e(modencode)	chr2R:9751735-9809072	0.0813371	0.0595493	-0.216163	-0.270227
Fer2LCH.a(modencode)	chr3R:26213998-26216316	0.177384	0.109327	-0.216076	-0.28874
Adar.b(modencode)	chrX:1667653-1678090	0.0897422	0.189109	-0.215028	-0.10219
Octbeta2R.f(modencode)	chr3R:8377628-8387596	0.167678	0.19012	-0.214668	-0.172121
enc-RD(modencode)	chr3L:3828720-3841392	0.188034	0.0885773	-0.21452	-0.307746
CG13609-RA(modencode)	chr3R:20052508-20054260	0.186753	0.159153	-0.214329	-0.343744
Sxl-RC(modencode)	chrX:6978197-6986910	0.178998	0.128431	-0.213899	-0.26765
CG17186-RA(modencode)	chr3R:15701692-15703220	0.192267	0.174155	-0.213652	-0.157436
CG42573.a(modencode)	chr3R:8948132-8981409	0.183468	0.172229	-0.212981	-0.161324
[truncated: 2,027 more rows]
