# Supplementary material for: Deep sequencing the circadian and diurnal transcriptome ofDrosophilabrain
Source: HighWire-hosted journal article supplement (doi:10.1101/gr.128876.111), 2012-04-03
Supplement: Table_S4.xlsx [file Table_S4.xlsx]

## Sheet: Sheet1
ANOVA_transcripts_nonPolyA_name	LD ANOVA_transcripts_nonPolyA_genotype q-value	LD ANOVA_transcripts_polyA_genotype q-value	DD ANOVA_transcripts_nonPolyA_genotype q-value
CG11697-RA(modencode)	0.000671556	0.00540433	2.17e-11
CG11697.a(modencode)	0.000671556	0.00544051	2.17e-11
CG13284-MIP22165(modencode)	0.000530444	0.00944418	3.68e-08
CG13284.a(modencode)	0.000566039	0.00908651	3.95e-08
CG13284.f(modencode)	0.00180099	0.00766104	6.62e-08
Kmn1-RA(modencode)	0.000114756	0.00419099	7.7e-08
nc_4354.a(modencode)	0.000231098	0.0244993	8.03e-08
CG11699.a(modencode)	0.00255847	0.00543734	8.2e-08
CG11699-RA(modencode)	0.00178382	0.00547388	8.98e-08
CG13284-RA(modencode)	0.00106007	0.00883776	9.34e-08
CG13284.g(modencode)	0.00118561	0.00601361	1.04e-07
CG13284.d(modencode)	0.00209507	0.00521561	1.09e-07
CG13284.e(modencode)	0.0013583	0.00513469	1.3e-07
Tequila-SD02860(modencode)	0.0115837	0.00316249	1.48e-07
CG13284-RB(modencode)	0.000680338	0.00871805	1.49e-07
Tequila-RD(modencode)	0.011521	0.00300417	1.49e-07
Tequila-RB(modencode)	0.0116219	0.00293976	1.53e-07
CG13284.b(modencode)	0.00268449	0.00498046	1.97e-07
CG31352.a(modencode)	0.00878466	0.140624	2e-07
CG15012-RC(modencode), CG15012-RB(modencode)	0.0248746	0.118546	2.04e-07
crm-RB(modencode)	0.000218561	0.19158	2.22e-07
CG13284.c(modencode)	0.00190495	0.00478904	2.4e-07
crm-RA(modencode)	0.000217449	0.191448	2.41e-07
chrU_7356781_7357351.0(modencode)	0.000269425	0.0141338	2.73e-07
Fps85D-RC(modencode)	0.0213829	0.0388254	4.3e-07
Fps85D.b(modencode)	0.0214224	0.0387658	4.57e-07
Fps85D-RB(modencode)	0.0185379	0.0388026	5.52e-07
Fps85D.a(modencode)	0.0187342	0.0388331	5.6e-07
TepIV-RA(modencode)	0.0367734	0.044609	5.63e-07
TepIV.c(modencode)	0.0367562	0.0446084	5.63e-07
TepIV.b(modencode)	0.036756	0.0446092	5.63e-07
TepIV.a(modencode)	0.0367352	0.0445644	5.77e-07
Mdr65.a(modencode)	0.0335604	0.109865	6.66e-07
Mdr65-RA(modencode)	0.0337123	0.109703	6.81e-07
CG11299.v(modencode)	0.042894	0.0708324	6.81e-07
CG11299.u(modencode)	0.0422916	0.0701135	6.84e-07
CG11299.t(modencode)	0.0435069	0.0690343	7e-07
CG11299.s(modencode)	0.0429046	0.0682861	7.03e-07
nc_21090.a(modencode)	0.000597399	0.0171859	7.32e-07
Fps85D-RA(modencode)	0.00703469	0.0377996	7.33e-07
CG11299-RB(modencode)	0.042708	0.0546496	8.32e-07
CG11299-RA(modencode)	0.0421028	0.0540287	8.32e-07
CG11299-RC(modencode)	0.0422499	0.0551679	8.48e-07
CG11299.q(modencode)	0.0429592	0.0545354	8.56e-07
CG11299.r(modencode)	0.0423506	0.0539112	8.56e-07
Fps85D.c(modencode)	0.0190606	0.0401541	1.35e-06
CG13890-RA(modencode)	0.0105473	0.0159173	1.37e-06
CG7607-RA(modencode)	0.00988816	0.136142	1.45e-06
CG8272-RA(modencode)	0.0124777	0.0113298	1.49e-06
Tsp42Ek-RA(modencode)	0.000418561	0.0114196	1.53e-06
CG5160.a(modencode)	0.0116623	0.0236918	1.58e-06
chrU_7356394_7356636.0(modencode)	0.00639311	0.0114861	1.62e-06
CG2816-RB(modencode)	0.0452375	0.0551067	1.9e-06
CG13822-RA(modencode)	0.0033948	0.00608209	2.05e-06
CG33673-RA(modencode)	0.00119108	0.0979386	2.11e-06
Gadd45-RA(modencode)	0.00238737	0.0263073	2.12e-06
Tsp42Ek.a(modencode)	0.000384365	0.00997234	2.12e-06
CG6836-RA(modencode)	0.0090465	0.0659324	2.17e-06
CG6836.a(modencode)	0.00904457	0.0680531	2.17e-06
CG6836.b(modencode)	0.00904457	0.0659271	2.17e-06
nc_20976.a(modencode)	0.0282221	0.0051739	2.32e-06
CG9813.b(modencode)	0.00534603	0.0828143	2.38e-06
CG9813-RF(modencode)	0.00535254	0.0828909	2.38e-06
CG9813-RC(modencode)	0.0053546	0.0829529	2.39e-06
CG9813.c(modencode)	0.00629509	0.0817751	2.67e-06
CG9813.d(modencode), CG9813-RD(modencode)	0.00630299	0.0819414	2.67e-06
CG9813-RA(modencode)	0.00629354	0.0817901	2.67e-06
CG9813-RE(modencode)	0.00630238	0.0818678	2.67e-06
CG33276-IP20163(modencode)	0.00274025	0.0232687	3e-06
CG2680-RB(modencode)	0.031638	0.0463668	3.09e-06
CG33276-RB(modencode)	0.00274483	0.0264432	3.1e-06
CG11407-RA(modencode)	0.0110018	0.0322988	3.12e-06
CG2680.a(modencode)	0.0310091	0.0464962	3.15e-06
CG9813.a(modencode)	0.00649809	0.0817901	3.34e-06
CG14253.a(modencode)	0.0648849	0.0766543	4e-06
Pax-RA(modencode)	0.00226571	0.0159242	4.04e-06
CG9813-RB(modencode)	0.00651138	0.0815401	4.09e-06
CG9486-RA(modencode)	0.0211043	0.00816836	4.15e-06
Nop60B.b(modencode)	0.000669	0.0811416	4.23e-06
CG6680.d(modencode)	0.0622395	0.11362	4.45e-06
CG6472-RA(modencode)	0.00624662	0.0875198	4.52e-06
snoRNA:Psi18S-1377e-RA(modencode)	0.00076338	0.142732	4.56e-06
CG6680.c(modencode)	0.0619449	0.113571	4.56e-06
CG18327-RA(modencode)	0.0122979	0.0161604	4.57e-06
CG1635-RA(modencode)	0.0369049	0.113539	4.68e-06
nc_20976.b(modencode)	0.0315839	0.00848497	4.79e-06
CG6680.b(modencode)	0.0439241	0.113893	5.06e-06
CG6680-RA(modencode)	0.0435505	0.1144	5.06e-06
CG14253-RB(modencode)	0.108382	0.0823336	5.64e-06
CG6680-RB(modencode)	0.0436675	0.1144	5.75e-06
Pax-RB(modencode)	0.00323053	0.0163849	5.87e-06
Fps85D-RD(modencode)	0.0116056	0.0391527	5.89e-06
CG13108-RA(modencode)	0.0075715	0.0640546	5.9e-06
CG8757-RA(modencode)	0.00526026	0.0079059	6.01e-06
CG32039-RA(modencode)	0.000229047	0.0436582	6.04e-06
CG34309-RA(modencode)	0.00446594	0.159397	6.33e-06
CG34309.b(modencode)	0.00447617	0.159371	6.35e-06
CG34309.a(modencode)	0.00447617	0.159372	6.35e-06
CG15611.a(modencode)	0.0320624	0.095798	6.36e-06
Invadolysin-RA(modencode)	0.0275016	0.109138	6.83e-06
CG15611-RA(modencode)	0.0317963	0.0982679	6.94e-06
CG15449-RA(modencode)	0.0125887	0.127632	7.68e-06
Cyp28d1-RA(modencode)	0.0493152	0.009357	7.97e-06
Mef2-RA(modencode)	0.0186705	0.161637	8.31e-06
Mef2-RB(modencode)	0.0183196	0.160039	8.44e-06
LD18889(modencode)	0.000571671	0.00874734	8.57e-06
CR32385-RA(modencode)	0.000571671	0.00874735	8.57e-06
CG14830-RA(modencode)	0.0277173	0.0509583	8.7e-06
nc_18757.a(modencode)	0.0103019	0.0326556	8.76e-06
CG9904-RA(modencode)	0.00566563	0.0199368	8.84e-06
CG9904.a(modencode)	0.00566599	0.0199377	8.84e-06
CG9904.b(modencode)	0.00566586	0.019937	8.84e-06
CdsA-RA(modencode)	0.0439588	0.163325	8.93e-06
CdsA.a(modencode)	0.043949	0.163322	8.95e-06
CG4686-RA(modencode)	0.116494	0.0243911	9.04e-06
Nop60B.d(modencode)	0.000600552	0.0875105	9.04e-06
CG4686.a(modencode)	0.11202	0.0280068	9.44e-06
psq.y(modencode)	0.00878569	0.174625	9.48e-06
Scp2-HL05814(modencode)	0.00302262	0.0553967	1.01e-05
CG8321-RA(modencode)	0.0107269	0.0859221	1.12e-05
Cyp12c1-RA(modencode)	0.137827	0.00494223	1.12e-05
nc_17701.a(modencode)	0.00518273	0.0135476	1.14e-05
Nop60B.a(modencode)	0.000574422	0.10683	1.15e-05
CG17082.n(modencode)	0.00259312	0.156762	1.17e-05
CG8757.b(modencode)	0.00459058	0.0089729	1.21e-05
snmRNA:641-RA(modencode)	0.0449911	0.0147811	1.22e-05
Clk.b(modencode)	0.000659757	0.0113136	1.23e-05
Nop60B.c(modencode)	0.000576233	0.13471	1.25e-05
Clk.a(modencode)	0.000660433	0.0113135	1.25e-05
CG6805-RA(modencode)	0.0044272	0.0126178	1.28e-05
CG6805.b(modencode)	0.0044272	0.0126269	1.28e-05
CG17082.o(modencode)	0.00193766	0.15734	1.29e-05
GNBP1-RA(modencode)	0.0283617	0.0560429	1.33e-05
Pitslre.e(modencode)	0.00870908	0.0714246	1.37e-05
snoRNA:Psi18S-1377d-RA(modencode)	0.00675475	0.158529	1.38e-05
CG10924-RA(modencode)	0.0617341	0.005252	1.39e-05
Pitslre.f(modencode)	0.00870903	0.0714231	1.39e-05
Scp2-RA(modencode)	0.00265605	0.0555594	1.41e-05
Clk-RD(modencode)	0.00119108	0.0316818	1.47e-05
Clk-RA(modencode)	0.00119648	0.0316859	1.49e-05
CG14253.c(modencode)	0.136367	0.0594949	1.52e-05
CG14757-RA(modencode)	0.0209576	0.08302	1.53e-05
CG14757-IP07694(modencode)	0.020155	0.0838324	1.53e-05
CG6805.a(modencode)	0.00453906	0.0139225	1.55e-05
CG17082.p(modencode)	0.00165732	0.156678	1.56e-05
Mef2-RD(modencode)	0.0198609	0.161478	1.62e-05
Mis12-RA(modencode)	0.0147347	0.029133	1.65e-05
Cyp4ac3-RA(modencode)	0.045229	0.0176887	1.68e-05
Cyp6a2-RA(modencode)	0.0243971	0.0331492	1.74e-05
CG7224.d(modencode)	0.0347785	0.0289216	1.8e-05
CG31670.a(modencode)	0.00549475	0.025094	1.95e-05
nc_16330.a(modencode)	0.000496786	0.0216178	2.03e-05
GlcAT-S-RC(modencode)	0.00815065	0.0537042	2.13e-05
CG10924.a(modencode)	0.064724	0.0050864	2.24e-05
CG32581-RA(modencode)	0.00244061	0.0524173	2.25e-05
CG6023-RA(modencode)	0.0336438	0.049509	2.26e-05
CG17082.q(modencode)	0.00106828	0.148551	2.28e-05
CG32581-RB(modencode)	0.00245634	0.052516	2.33e-05
CG15443-RA(modencode)	0.0137624	0.0516571	2.36e-05
l(2)01289-RJ_l(2)01289-RJ(modencode)	0.0158655	0.0269954	2.53e-05
CG31555-RA(modencode)	0.0187102	0.102125	2.59e-05
CG3999.b(modencode)	0.000128635	0.0278204	2.59e-05
CG7224-RA(modencode)	0.032655	0.0254597	2.61e-05
CG15611-RB(modencode)	0.041999	0.0938386	2.62e-05
Pitslre-RD(modencode)	0.00946517	0.073201	2.65e-05
Spn43Ab-RB(modencode), Spn43Ab-RA(modencode)	0.0679962	0.0860881	2.71e-05
CG7224.a(modencode)	0.0348378	0.024379	2.87e-05
CG7224.b(modencode)	0.0348378	0.0243789	2.87e-05
CG7224.c(modencode)	0.0348377	0.024379	2.87e-05
Fhos-RB(modencode)	0.000228933	0.00688378	2.87e-05
S1P-RA(modencode)	0.000894781	0.013232	2.95e-05
Pitslre-RB(modencode)	0.00940031	0.0741759	2.96e-05
Pkc53E.c(modencode)	0.00116773	0.00942497	2.97e-05
CG13360-RA(modencode)	0.0186915	0.0326215	2.97e-05
Pkc53E.b(modencode)	0.00116716	0.00944696	3e-05
nc_21029.a(modencode)	0.016562	0.0116878	3.03e-05
Irk3-RB(modencode)	0.0259967	0.0160349	3.06e-05
CG7224-RB(modencode)	0.0351866	0.0224264	3.08e-05
Rab14-RC(modencode)	0.0935425	0.0260543	3.13e-05
CG9948.c(modencode)	0.0280431	0.0486132	3.17e-05
CG9948.a(modencode)	0.0280424	0.0486134	3.17e-05
CG6023-RB(modencode)	0.0346924	0.0559499	3.2e-05
nc_16091.a(modencode)	0.0157493	0.0085478	3.22e-05
Pkc53E.h(modencode)	0.00169464	0.00903795	3.4e-05
Aph-4-RA(modencode)	0.0451916	0.0309332	3.41e-05
Pkc53E.g(modencode)	0.00168848	0.00907358	3.43e-05
GstD9-RA(modencode)	0.0219025	0.0581913	3.48e-05
Irk3-RA(modencode)	0.0266367	0.0177397	3.52e-05
Irk3.a(modencode)	0.026663	0.0177398	3.52e-05
CG11899-RA(modencode)	0.0814007	0.0925365	3.52e-05
CG42487-RA(modencode)	0.0156234	0.0185422	3.54e-05
CG11899.b(modencode)	0.0814723	0.092833	3.55e-05
CG11899.a(modencode)	0.0812514	0.0926531	3.56e-05
ssp4.k(modencode)	0.00127157	0.0653202	3.58e-05
nc_21013.a(modencode)	0.000722284	0.136692	3.78e-05
CG6665-RA(modencode)	0.0399698	0.0959809	3.85e-05
CG6665-RC(modencode)	0.0399693	0.094833	3.85e-05
ssp4-RD(modencode)	0.000802566	0.060721	3.89e-05
CG4847.a(modencode)	0.0264925	0.021937	3.96e-05
CG3999.a(modencode)	0.000286329	0.0406299	3.98e-05
lectin-28C-RA(modencode)	0.00972252	0.0057219	4.04e-05
CG13282-RA(modencode)	0.030214	0.0955868	4.08e-05
LP05425(modencode)	0.117333	0.0293791	4.11e-05
dnr1-RA(modencode)	0.036463	0.0527566	4.21e-05
ssp4.g(modencode)	0.000841525	0.0645851	4.3e-05
CG31674.a(modencode)	0.00436384	0.0322181	4.31e-05
CG6357-RA(modencode)	0.0120186	0.1514	4.38e-05
CG31674-RA(modencode)	0.00444794	0.0329601	4.38e-05
CG10924.c(modencode)	0.0660925	0.0048891	4.4e-05
Cyp12a4-RA(modencode)	0.0247181	0.0119522	4.42e-05
CG10924-RB(modencode)	0.0663685	0.00494615	4.45e-05
ssp4-RF(modencode)	0.000775834	0.0545722	4.47e-05
nc_1047.a(modencode)	0.00564997	0.0575619	4.49e-05
CG32444-RA(modencode)	0.0770558	0.00677585	4.5e-05
Hydr2.d(modencode)	0.0767526	0.121209	4.54e-05
CG10924.b(modencode)	0.0654065	0.00493432	4.55e-05
CG40498.a(modencode)	0.00311994	0.106241	4.56e-05
Pkc53E.a(modencode)	0.00251818	0.00937121	4.81e-05
l(2)01289-RI_l(2)01289-RI(modencode)	0.033237	0.0290107	4.88e-05
l(2)01289-RF_l(2)01289-RF(modencode)	0.0329251	0.0259219	4.92e-05
l(2)01289.a_l(2)01289.a(modencode)	0.0329642	0.0252426	4.93e-05
l(2)01289-RB_l(2)01289-RB(modencode)	0.0329512	0.0260414	5.05e-05
fln-RA(modencode)	0.0238256	0.0205868	5.08e-05
ssp4-RC(modencode)	0.000539433	0.0527067	5.24e-05
PGRP-LC.j(modencode)	0.0590642	0.0399142	5.26e-05
Patsas-RA(modencode)	0.0565134	0.198773	5.29e-05
Aph-4-RB(modencode)	0.0435606	0.032027	5.29e-05
CG34353.a(modencode)	0.00931066	0.133421	5.32e-05
pnt.c(modencode)	0.00690589	0.0137347	5.37e-05
CG13375.a(modencode)	0.028895	0.114653	5.46e-05
PGRP-LC.i(modencode)	0.0595681	0.0399143	5.59e-05
nc_6391.a(modencode)	0.0423631	0.0476157	5.63e-05
sun.a(modencode)	0.0311983	0.128169	5.81e-05
Ncc69-RA(modencode)	0.0228421	0.0237624	5.87e-05
Cyp4p1-RA(modencode)	0.0699652	0.0172969	5.94e-05
CG4409-RB(modencode)	0.00912816	0.136879	6.05e-05
psq.o(modencode)	0.0067443	0.156793	6.08e-05
vfl.g(modencode)	0.0221992	0.175917	6.2e-05
vfl.p(modencode)	0.024869	0.180111	6.26e-05
NLaz-RA(modencode)	0.0450825	0.103957	6.34e-05
psq.aa(modencode)	0.00671957	0.15697	6.43e-05
CG7447-RB(modencode)	0.0258478	0.0294291	6.5e-05
CG7447.a(modencode)	0.0255035	0.029678	6.51e-05
CG34051.a(modencode)	0.0166627	0.00876999	6.7e-05
ana1-RB(modencode)	0.00973645	0.0206634	6.8e-05
CG9948.b(modencode)	0.0443472	0.0470258	6.8e-05
CG9948-RA(modencode)	0.0443434	0.0470258	6.8e-05
CG14963-RA(modencode)	0.000464849	0.0674747	6.9e-05
vfl.f(modencode)	0.0200374	0.18471	6.96e-05
CG31817-RA(modencode)	0.035217	0.0144528	7e-05
l(1)G0196-IP14878_l(1)G0196-IP14878(modencode)	0.0829904	0.0114535	7.05e-05
CG34353.f(modencode)	0.00933908	0.140559	7.09e-05
CG31817.a(modencode)	0.03492	0.0148967	7.14e-05
CG31817.b(modencode)	0.0346061	0.0148965	7.33e-05
nc_11074.a(modencode)	0.0193638	0.0859232	7.38e-05
CG34353.h(modencode)	0.00912512	0.15049	7.43e-05
fbp-RA(modencode)	0.154994	0.0687361	7.66e-05
Madm.a(modencode)	0.00980432	0.0122262	7.8e-05
CG5715-RA(modencode), CG5715.a(modencode)	0.0756466	0.193431	7.93e-05
vfl.c(modencode)	0.0184962	0.141963	7.97e-05
CG7447-RA(modencode)	0.0379567	0.0295961	7.97e-05
CG32082-GH10931(modencode)	0.00469021	0.0172041	8.19e-05
spir-MIP18615(modencode)	0.000245175	0.064228	8.28e-05
vfl.i(modencode)	0.0327848	0.113487	8.32e-05
CG4847-RA(modencode)	0.029385	0.0208832	8.41e-05
CG12488-RA(modencode)	0.0235805	0.120647	8.45e-05
CG9902-RA(modencode)	0.000703267	0.0432664	8.53e-05
CG12818-RA(modencode)	0.0208089	0.181744	8.61e-05
CG18343-RA(modencode)	0.0271734	0.0120221	8.74e-05
CG18343-TA01006(modencode)	0.0271729	0.0115862	8.74e-05
nc_10075.a(modencode)	0.0269063	0.0416677	8.78e-05
chr2R_9378377_9378939.0(modencode)	0.0236512	0.012179	9.17e-05
PGRP-LC.g(modencode)	0.0393223	0.0248706	9.24e-05
spir.a(modencode)	0.000632076	0.0105975	9.28e-05
spir-SD10157(modencode)	0.000632076	0.0105972	9.28e-05
CG34353.d(modencode)	0.0114814	0.164922	9.32e-05
spir-RD(modencode)	0.000630503	0.0106707	9.43e-05
nc_11966.b(modencode)	0.0152784	0.0244302	9.43e-05
CG1311.b(modencode)	0.0579739	0.036118	9.54e-05
CG7777-MIP17260(modencode)	0.0126119	0.10471	9.58e-05
CG13375.c(modencode)	0.0194243	0.0582445	9.61e-05
CG13375.b(modencode)	0.0195386	0.0571468	9.61e-05
PGRP-LC.c(modencode)	0.0397733	0.0248746	9.75e-05
PGRP-LC-RG(modencode)	0.0400343	0.0252863	9.93e-05
CG32082-RA(modencode)	0.0108834	0.00807242	0.0001
nc_14315.a(modencode)	0.0175291	0.190466	0.000100664
PGRP-LC-RC(modencode)	0.0404829	0.0252782	0.000103459
CG5888-RA(modencode)	0.0328612	0.0103405	0.000103818
StIP-RA(modencode)	0.00101866	0.00546355	0.000105943
nc_11966.a(modencode)	0.0158989	0.0241341	0.000105943
l(2)01289-RG_l(2)01289-RG(modencode)	0.0442155	0.127997	0.000105943
MIP12608(modencode)	0.0995422	0.0448245	0.000106293
cry-RA(modencode)	0.150551	0.0394556	0.000106641
DNApol-eta-RA(modencode)	0.00429047	0.0507215	0.000107333
CG7149.b(modencode)	0.0105262	0.108513	0.000107333
CG9272-RA(modencode)	0.0039061	0.0475059	0.000108361
ana1-RA(modencode)	0.0133632	0.0230555	0.000108361
ana1.a(modencode)	0.0133638	0.0230498	0.000108361
ana1-IP16240(modencode)	0.0130068	0.0271154	0.000108721
CG13375.h(modencode)	0.0400156	0.0160939	0.000108721
Gbeta76C-RA(modencode)	0.00758324	0.0956559	0.000108721
CG7777.a(modencode)	0.0114516	0.104201	0.000109436
CG7149.c(modencode)	0.0112427	0.133849	0.000110851
fu12.a(modencode)	0.0606424	0.169154	0.0001119
fu12.b(modencode)	0.0606361	0.170313	0.0001119
CG13375.f(modencode)	0.0413729	0.0148126	0.000112248
CG17928.e(modencode)	0.0188694	0.0506468	0.000114646
CG17928.c(modencode)	0.0188694	0.0506469	0.000114646
GstE1-RA(modencode)	0.0562634	0.0319607	0.000116325
fu12-RB(modencode)	0.0626485	0.169459	0.000116989
CG6353.b(modencode)	0.0259229	0.0584211	0.000118304
CG7149-RA(modencode)	0.0116417	0.111216	0.000118954
CG7777-RA(modencode)	0.0101269	0.103141	0.000118954
CG7272.a(modencode)	0.0314371	0.124129	0.000119278
CG7149.a(modencode)	0.0116599	0.111188	0.000119601
CG32177-RA(modencode)	0.029765	0.129237	0.000120563
snoRNA:291-RA(modencode)	0.0984264	0.0892492	0.000125496
CG13375.d(modencode)	0.0544681	0.0203623	0.000127778
CG7272.b(modencode)	0.0326937	0.11785	0.000128909
CG13375.e(modencode)	0.0543611	0.0203881	0.000129284
CG7272-RA(modencode)	0.0327458	0.12391	0.000129284
nc_14314.a(modencode)	0.056343	0.117322	0.000131891
CG6293.a(modencode)	0.0931508	0.0859519	0.000132261
CG17928.d(modencode)	0.0187961	0.0520357	0.000138076
Fmo-1-RA(modencode)	0.0159057	0.0435613	0.000138434
spir-RE(modencode)	0.00114213	0.055227	0.000139147
spir-RB(modencode)	0.00114213	0.0551817	0.000139147
spir-RA(modencode)	0.00112333	0.0549337	0.00014162
pnt-RD(modencode)	0.00786838	0.0214983	0.000142321
nc_21067.a(modencode)	0.000588407	0.0666509	0.000144407
nc_21067.d(modencode)	0.000591733	0.0666015	0.000144407
nc_21067.c(modencode)	0.000594185	0.0667509	0.000145441
nc_21067.b(modencode)	0.000588407	0.0662561	0.000145784
CG6353.a(modencode)	0.0238576	0.0618659	0.000146811
CG12256-RA(modencode)	0.0511417	0.0564134	0.000146811
vfl.b(modencode)	0.0389012	0.137821	0.000148846
snoRNA:Psi18S-1377b-RA(modencode)	0.0963906	0.115502	0.000149183
nc_16247.a(modencode)	0.0517081	0.0559226	0.00015019
snoRNA:Psi28S-3186-RA(modencode)	0.0041131	0.0295281	0.000150525
nc_292.a(modencode)	0.0101067	0.040634	0.000152214
CG8974-RC(modencode)	0.0188651	0.0572318	0.000153586
CG4393.a(modencode)	0.04485	0.0218493	0.000153928
CG4393-RB(modencode)	0.0447169	0.0221198	0.00015461
CG6353-RA(modencode)	0.0246995	0.0642921	0.000157039
ninaD-RA(modencode)	0.0323522	0.024538	0.000162517
Gpdh-RB(modencode)	0.00874952	0.0126665	0.000163866
CG17928.a(modencode)	0.0207185	0.0464873	0.000165541
CG17928-RA(modencode)	0.0207165	0.0462415	0.000165874
nc_11966.d(modencode)	0.0148647	0.028569	0.000172115
l(2)tid-RC_l(2)tid-RC(modencode)	0.00414259	0.187089	0.000175648
l(2)tid-RB_l(2)tid-RB(modencode)	0.00410716	0.184409	0.000175648
MB6.chr3R.pasa.10627.a(modencode)	0.0120096	0.097289	0.000176602
l(2)tid-RA_l(2)tid-RA(modencode)	0.00411013	0.184411	0.000177867
l(2)tid.a_l(2)tid.a(modencode)	0.00414259	0.187077	0.000178182
CG1311.a(modencode)	0.0770654	0.0364613	0.000178811
CG1311-RA(modencode)	0.0770646	0.0364622	0.000180686
CG8974-RA(modencode)	0.0187707	0.0570046	0.000183161
CG8974-RB(modencode)	0.0190893	0.0569422	0.000183469
CG8974-RE(modencode)	0.018979	0.0568413	0.000184388
CG8974-RD(modencode)	0.0187547	0.0567511	0.000185608
CG14441.e(modencode)	0.00474944	0.114894	0.000188926
Lsd-1-RA(modencode)	0.177996	0.108603	0.000190417
Lsd-1-RB(modencode)	0.179384	0.109327	0.000191603
Lsd-1.a(modencode)	0.179196	0.10902	0.000191898
Lsd-1.b(modencode)	0.179195	0.10902	0.000191898
Lsd-1-RC(modencode)	0.179155	0.109019	0.000191898
CG32441.a(modencode)	0.0963529	0.0509788	0.000195409
Gpdh.d(modencode)	0.00960476	0.00809115	0.000196566
snoRNA:Psi28S-1060-RA(modencode)	0.00559002	0.120268	0.000198004
CG17928.b(modencode)	0.0205793	0.0477638	0.000198576
Hydr2.c(modencode)	0.0640501	0.0933285	0.000199999
CG32441-RC(modencode)	0.0998569	0.0519841	0.000200566
CG15210-RA(modencode)	0.167262	0.0089448	0.000202256
CG33992-RA(modencode)	0.00334504	0.123288	0.000203096
nc_6835.c(modencode)	0.00905428	0.111805	0.000205319
CG7777-RB(modencode)	0.0106482	0.101876	0.000205871
Gpdh.a(modencode)	0.0102914	0.0151366	0.00020888
CG32441-RD(modencode)	0.101703	0.0525037	0.000220501
CG40498.b(modencode)	0.00256842	0.106634	0.000224586
SPR.b(modencode)	0.036685	0.123585	0.000225742
SPR.c(modencode)	0.0365141	0.111096	0.000227469
Gpdh-RC(modencode)	0.0103846	0.0146922	0.000232648
Gpdh.b(modencode)	0.010202	0.0168815	0.000237739
CG6129.b(modencode)	0.0433362	0.0322787	0.000243018
robo3-RA(modencode)	0.00487754	0.121329	0.00024494
CG17361-RA(modencode)	0.0210082	0.0829283	0.00024807
Gpdh-RA(modencode)	0.0105549	0.0248419	0.000259595
Gpdh.c(modencode)	0.010582	0.024882	0.000261297
CG6129.a(modencode)	0.0435548	0.0319094	0.000263554
nc_16269.a(modencode)	0.0421578	0.0585171	0.000264397
CG13605-RB(modencode)	0.0344709	0.0177287	0.000268028
CG4367.a(modencode)	0.0370077	0.14259	0.000269969
SPR-RA(modencode)	0.0401995	0.107694	0.000270522
SPR.a(modencode)	0.0399614	0.0897344	0.000272175
psq.q(modencode)	0.0088596	0.176436	0.000274095
LanB1-RB(modencode)	0.0222243	0.0267201	0.000277634
LanB1.a(modencode)	0.0223465	0.0268741	0.000278986
CG4884-RA(modencode)	0.0391301	0.0535956	0.000291337
LanB1-RA(modencode)	0.0146571	0.0268679	0.000291337
GM31309(modencode)	0.00554467	0.0162216	0.00029948
UbcD4-RA(modencode)	0.00953805	0.151101	0.000309
pnt.b(modencode)	0.0129139	0.0283303	0.000344508
CG6125.a(modencode)	0.030954	0.0995862	0.000388246
GC-RB(modencode)	0.00162548	0.149662	0.000390916
CG6125-RA(modencode)	0.0376841	0.0995741	0.000391211
CG6125.b(modencode)	0.0376888	0.099574	0.000391283
CG31860-RA(modencode)	0.0122636	0.134519	0.000403639
CG31860-IP13286(modencode)	0.0122008	0.13437	0.000403648
CG6125-RB(modencode)	0.0304186	0.100825	0.000414465
CG6870-RA(modencode)	0.0436253	0.0633241	0.000421537
Tapdelta-RA(modencode)	0.00986109	0.15778	0.000425847
CG3835-RC(modencode)	0.0362706	0.154607	0.000430404
Mbs-RE(modencode)	0.00175472	0.0244368	0.000441634
CG3835-RA(modencode)	0.0385988	0.151476	0.000447512
CG2681-RA(modencode)	0.0053776	0.0586794	0.000457648
MB6.chr3R.pasa.11566.a(modencode)	0.031159	0.121775	0.000460902
Pli-GM07040(modencode)	0.00842143	0.0113372	0.000464825
CG3835.b(modencode)	0.0441058	0.149979	0.000466814
nc_11966.c(modencode)	0.0294417	0.157713	0.000471062
CG5160-RA(modencode)	0.00337837	0.023243	0.000475918
PGRP-LC.a(modencode)	0.100142	0.0192665	0.000476229
CG14253.e(modencode)	0.0892422	0.0690174	0.00047705
GC-RA(modencode)	0.00183469	0.150158	0.00048416
Nop60B-RA(modencode)	0.0379461	0.177196	0.000484165
CG2107-RA(modencode)	0.114307	0.0188813	0.000488787
asparagine-synthetase-RA(modencode)	0.0284323	0.0360761	0.00049211
CG4484-RA(modencode)	0.00696539	0.0746978	0.000494712
CG17568-RA(modencode)	0.00970571	0.0934035	0.000499279
CG30083-RB(modencode)	0.100699	0.0861476	0.000507843
PGRP-LC-RA(modencode)	0.0996116	0.0198266	0.000537719
CG32082.a(modencode)	0.0167424	0.0104203	0.000568275
CG3835.a(modencode)	0.0429644	0.15326	0.000571943
CG3835-RB(modencode)	0.0378398	0.15045	0.000574565
CG33993-RA(modencode)	0.0948702	0.025518	0.000575558
CG2893.e(modencode)	0.0118568	0.00876191	0.000584799
PGRP-LC-RD(modencode)	0.0692094	0.019522	0.00058911
CG2893.f(modencode)	0.00959112	0.0108424	0.000604286
fbp.a(modencode)	0.15651	0.0609916	0.000612877
PGRP-LC.d(modencode)	0.10948	0.0210832	0.000614119
CG14441-RA(modencode)	0.00430971	0.194626	0.000616323
l(2)k09913-RD_l(2)k09913-RD(modencode)	0.0130249	0.0931346	0.000616722
CG14441.c(modencode)	0.00440627	0.195359	0.000626059
nc_2764.a(modencode)	0.0192787	0.0478126	0.000637096
tacc-MIP19445(modencode)	0.0161334	0.192875	0.000642927
nc_21270.a(modencode)	0.0848351	0.117044	0.000645604
UGP-RA(modencode)	0.129344	0.0238163	0.000660684
UGP-RE(modencode)	0.125424	0.0243458	0.000673087
noe-RC(modencode)	0.0611625	0.0122018	0.000687217
Drs-RA(modencode)	0.120469	0.140171	0.000689875
Cpr49Ag-RA(modencode)	0.0843046	0.0496692	0.000695959
psnoRNA:CG32479-b(modencode)	0.0144365	0.0551638	0.000707417
CG3225.a(modencode)	0.0171734	0.0328311	0.000715628
UGP-RD(modencode)	0.127061	0.0233278	0.000731096
CG10444-RA(modencode)	0.0387516	0.171065	0.000733985
UGP-RC(modencode)	0.130591	0.0237187	0.000736509
l(2)k09913.c_l(2)k09913.c(modencode)	0.01259	0.0908991	0.000738218
pnt-RC(modencode)	0.0141971	0.0229283	0.000742487
Cyp4p3-RA(modencode)	0.050259	0.198187	0.000750446
CG10513-RB(modencode)	0.04318	0.0193087	0.000767498
noe-RB(modencode)	0.0629561	0.012702	0.000776383
sage-RB(modencode)	0.0483931	0.0459658	0.000791668
CG14441.d(modencode)	0.0160846	0.0839388	0.000819525
CG2893.h(modencode)	0.010513	0.0112657	0.000823297
l(2)k09913.f_l(2)k09913.f(modencode)	0.0126616	0.0932653	0.000828736
CG31743-RA(modencode), CG34313-RA(modencode)	0.0201585	0.0420403	0.000851798
l(2)k09913.e_l(2)k09913.e(modencode)	0.0122625	0.0927407	0.000853692
CG18467.a(modencode)	0.032817	0.102386	0.000854579
CG42249.c(modencode)	0.0222584	0.0800453	0.000854609
CG2807-RA(modencode)	0.0185014	0.0633475	0.000862532
CG2893.g(modencode)	0.0105858	0.0109008	0.000866291
CG2893.d(modencode)	0.0133882	0.00884593	0.000868365
CG3225.b(modencode)	0.0165132	0.0237856	0.000870742
CG14253.b(modencode)	0.137553	0.0575428	0.000898379
CG1962.a(modencode)	0.0303342	0.0753272	0.000901802
CG1962-RA(modencode)	0.0302615	0.0554446	0.000912582
CG1962-RB(modencode)	0.0301527	0.112524	0.000921294
CG13814-RA(modencode)	0.104775	0.0186621	0.00092817
CG2893-RE(modencode)	0.00973374	0.0160135	0.000936064
Cyp4p3.a(modencode)	0.0531497	0.167703	0.000956821
CG9391.a(modencode)	0.168535	0.0142085	0.00100016
Taf1.b(modencode)	0.0161282	0.132321	0.00100649
CG3894.a(modencode)	0.0946274	0.0311439	0.00104457
CG8192.a(modencode)	0.00914821	0.0505628	0.00104907
CG8192-RA(modencode)	0.00914851	0.0505651	0.00104917
Tom34-RA(modencode)	0.0358574	0.00869419	0.00105631
CG41343.b(modencode)	0.00384753	0.0128067	0.0010707
rl.e(modencode)	0.0119814	0.197705	0.00110704
tw-RA(modencode)	0.00725588	0.132356	0.00113067
nc_22394.a(modencode)	0.0274758	0.100635	0.00113221
CG14441.b(modencode)	0.0146658	0.0491878	0.00113319
nc_9693.a(modencode)	0.00949282	0.0169636	0.00116469
CG6981-RA(modencode)	0.00987962	0.00631637	0.00118553
CG6981-RB(modencode)	0.00987956	0.00631637	0.00118554
CG42345.b(modencode)	0.0151963	0.0349044	0.00120371
CG4933-RA(modencode)	0.0499479	0.197998	0.00124114
CG6981.a(modencode)	0.00980474	0.00627811	0.00125475
CG4462.a(modencode)	0.0256562	0.0124891	0.00125531
CG2893.a(modencode)	0.0114477	0.015949	0.00126307
rec-RA(modencode)	0.0591055	0.179933	0.00128571
Ilp3-IP05494(modencode)	0.0761735	0.121608	0.00129045
CG6981-MIP20784(modencode)	0.0099591	0.00619247	0.00129691
Dhpr-RB(modencode)	0.0167325	0.0373207	0.00129905
CG2893-RA(modencode)	0.0108131	0.0159632	0.00133248
Dhpr.a(modencode), Dhpr-RC(modencode)	0.0166301	0.0370365	0.00133784
Pis-RA(modencode)	0.0466074	0.0707751	0.00134649
eater.a(modencode)	0.0514171	0.0630034	0.00134774
CG31235.a(modencode)	0.0101592	0.0100888	0.00135032
Ilp3.a(modencode)	0.0798483	0.121469	0.00135271
eater-SD22390(modencode)	0.0515707	0.0634407	0.0013539
eater-RB(modencode)	0.0515713	0.063599	0.00135951
ald.a(modencode)	0.0593174	0.132871	0.00138581
ald-RA(modencode)	0.0592188	0.133395	0.00138587
CG14253.h(modencode)	0.096567	0.0633567	0.0013875
CG40191-RD(modencode)	0.00462429	0.055547	0.00139089
CG13375-RA(modencode)	0.0286082	0.189018	0.00139657
Ilp3-RA(modencode)	0.0796254	0.121778	0.00140091
psq.s(modencode)	0.00884432	0.175219	0.00141005
psq.r(modencode)	0.00884819	0.175322	0.00141512
CG16926-RA(modencode)	0.1799	0.0739442	0.00141946
psq.t(modencode)	0.00884754	0.17669	0.00143198
CG14329.a(modencode)	0.0410491	0.0381988	0.00144988
CG14329-RA(modencode)	0.0406422	0.0381726	0.00145011
GV1-RB(modencode)	0.017123	0.0220996	0.00145692
rl.j(modencode)	0.0242557	0.190603	0.00146271
chrX_3462354_3463298.0(modencode)	6.40486e-05	0.10931	0.00148142
chr2R_15236723_15237392.0(modencode)	0.109134	0.092726	0.00149937
CG32669-RA(modencode)	0.019153	0.128977	0.00151576
CG40191.f(modencode)	0.00461231	0.0720059	0.00152873
CG15005.a(modencode)	0.0522494	0.112043	0.00154589
nc_17835.a(modencode)	0.0537415	0.0535553	0.00154838
CG30359.a(modencode)	0.105712	0.0315108	0.00157263
CG9902.d(modencode)	0.00060441	0.0231473	0.00160215
CG7722-RA(modencode)	0.00102527	0.0260865	0.00160552
CG42324.f(modencode)	0.0439604	0.111425	0.00161749
Dystrophin-RG(modencode)	0.00969049	0.0330298	0.00164041
CG7722-RB(modencode), CG7722.a(modencode)	0.000874718	0.0258439	0.00164335
CG34303-RA(modencode)	0.000922063	0.0201467	0.00164982
CG2893-RD(modencode)	0.0105612	0.0179545	0.00165284
PGRP-LC.e(modencode)	0.0708899	0.0265027	0.00165518
chr2L_17589168_17589431.0(modencode)	0.0124438	0.0437231	0.0016708
CG42508-RA(modencode), CG4468-RA(modencode)	0.0530005	0.0619811	0.00168736
CG30344-RA(modencode)	0.0335956	0.0417598	0.00172758
snoRNA:Psi28S-3571-RA(modencode)	0.0507304	0.179664	0.0017334
capa-RA(modencode)	0.00522332	0.14731	0.00176782
CG30359-RA(modencode)	0.105706	0.0315108	0.00181361
CG30359-RB(modencode)	0.105711	0.0315107	0.00181362
CG42324.g(modencode)	0.0440364	0.110935	0.00181843
Adh-RI(modencode)	0.0359435	0.0612788	0.00182824
Kul.b(modencode)	0.0072157	0.126532	0.00183432
snoRNA:Me28S-G1083a-RA(modencode)	0.000481386	0.0130258	0.00183656
Rcd2-RA(modencode)	0.00359834	0.0140712	0.00189622
psq.z(modencode)	0.0102264	0.174665	0.00192616
PGRP-LC-RE(modencode)	0.0340741	0.0388226	0.00192665
psq.l(modencode)	0.0102795	0.173036	0.00194147
CG42345.a(modencode)	0.00926806	0.00991011	0.00195393
Ppn.a(modencode)	0.12134	0.0710796	0.00195488
Ppn-RE(modencode)	0.121441	0.0710615	0.00195884
Ppn-RG(modencode)	0.120756	0.0711475	0.00195973
CG17169-RB(modencode)	0.0641039	0.0466843	0.00197012
CG4462-RA(modencode)	0.0310588	0.0125855	0.00198163
rn.m(modencode)	0.0160397	0.115216	0.0019909
Ppn-RF(modencode)	0.121375	0.0714165	0.00199373
Ppn.b(modencode)	0.120653	0.0714588	0.00199457
CG7137-RA(modencode)	0.0938424	0.0883499	0.00199667
CG42345-RE(modencode)	0.0269881	0.0253139	0.0020054
CG42345.e(modencode)	0.00939025	0.00862618	0.00201546
CG42345.g(modencode)	0.00939128	0.00928866	0.00201563
CG41343.a(modencode)	0.00619715	0.0166097	0.0020322
PGRP-LC.f(modencode)	0.0325775	0.0383748	0.00204957
CG6983.a(modencode)	0.0549402	0.185928	0.00205107
CG6983-RA(modencode)	0.0549399	0.185928	0.00205118
rn.i(modencode)	0.0157887	0.107877	0.00206188
rn.c(modencode)	0.0162522	0.100834	0.00206347
Ppn-RC(modencode)	0.122661	0.0808784	0.00207546
CG3225-RA(modencode)	0.0320211	0.199068	0.00208584
Dystrophin-RF(modencode)	0.00980717	0.0337427	0.00210508
MTA1-like.a(modencode)	0.0442897	0.105299	0.0021281
CG18467.b(modencode)	0.0340423	0.102554	0.00212844
chr3L_7763493_7764700.0(modencode)	0.00435848	0.0072093	0.0021585
rn.l(modencode)	0.0107539	0.150136	0.00222111
CG1773-RA(modencode)	0.171702	0.118507	0.00222371
CG6854-RA(modencode)	0.0382176	0.154561	0.00225204
phyl-RA(modencode)	0.0106947	0.0316665	0.00228729
CG31202-RA(modencode)	0.00146942	0.176884	0.00228931
CG6854.a(modencode)	0.0392075	0.187131	0.00231273
Pkc53E.e(modencode)	0.00338167	0.0089054	0.00231714
baz.a(modencode)	0.000219452	0.00535746	0.00234584
chr3L_15093344_15094204.0(modencode)	0.000482832	0.154911	0.00238742
CG1773-RB(modencode)	0.172011	0.124557	0.0023912
proPO-A1-RA(modencode)	0.14024	0.0367374	0.00242503
CG2767-RB(modencode)	0.0768696	0.184124	0.00243189
CG14253.d(modencode)	0.107227	0.0484009	0.00244203
psq.u(modencode)	0.00721406	0.182727	0.00244836
CG14253-RA(modencode)	0.105175	0.0497098	0.00245625
CG18467.c(modencode)	0.0340437	0.102554	0.00246992
psq.j(modencode)	0.00723499	0.182941	0.0024867
psq.p(modencode)	0.00723165	0.1833	0.00248707
CG32412.a(modencode)	0.0519844	0.0613013	0.00249838
CG34398-RA(modencode)	0.0681886	0.11123	0.00253746
GstS1-RA(modencode)	0.0458113	0.00780956	0.00253942
CG14253.f(modencode)	0.111247	0.04377	0.00254539
CG14253-RD(modencode)	0.111253	0.0437681	0.00254542
CG15209-RA(modencode)	0.0230666	0.093676	0.00262178
GstS1.a(modencode)	0.0438567	0.0078091	0.00262942
CG9095-RA(modencode)	0.0063706	0.194948	0.00267522
ics-RA(modencode)	0.0377039	0.00685811	0.00268333
IM2-RA(modencode)	0.154256	0.0298634	0.00269207
CG14253-RC(modencode)	0.106306	0.0480696	0.00270119
olf186-M-RA(modencode)	0.0431999	0.113008	0.00271096
CG14253.g(modencode)	0.116056	0.0413971	0.00272653
CG14253-RE(modencode)	0.107274	0.0483333	0.00275014
nc_22683.a(modencode)	0.00979079	0.0632214	0.00277828
nc_21279.a(modencode)	0.0529808	0.167329	0.00277943
CG42345-RD(modencode)	0.0298022	0.0256066	0.00279107
CG14495-RA(modencode)	0.0201737	0.0502305	0.00286891
CG9634-RA(modencode)	0.0471379	0.0145483	0.00295442
ics-MIP12770(modencode)	0.0372158	0.00776651	0.00296588
CG11400-RA(modencode)	0.138774	0.0454207	0.00303826
CG5867-RA(modencode)	0.0110785	0.0914334	0.00305203
CG11406.a(modencode)	0.0305474	0.17967	0.00320946
nc_6835.b(modencode)	0.0298144	0.0319451	0.00327188
CG14830.a(modencode)	0.0277177	0.050956	0.0034287
GV1.a(modencode)	0.0189243	0.00545904	0.00344468
GV1.e(modencode)	0.0170626	0.0054277	0.00346774
CG11796-RA(modencode)	0.063571	0.0627391	0.00347173
CG9238-RA(modencode)	0.0111804	0.0772658	0.00349478
CG4408-RA(modencode)	0.097417	0.0601434	0.00351552
GV1.b(modencode)	0.0176079	0.00545752	0.00352216
CG7394-RA(modencode)	0.00927242	0.0401599	0.0035394
GV1.c(modencode)	0.0193753	0.00539568	0.00356649
CG7394-RB(modencode)	0.00911169	0.0404577	0.00356915
GV1-RA(modencode)	0.0189266	0.00537787	0.00361428
Pkc53E-RB(modencode)	0.00336511	0.0100729	0.00367326
CG2947-RB(modencode)	0.029361	0.0356071	0.00368317
CG2947-RA(modencode)	0.0293718	0.0356073	0.00368319
CG2893-RF(modencode)	0.0119814	0.0179056	0.00376527
tsl-RA(modencode)	0.0721766	0.115686	0.00384781
CG9238-RB(modencode)	0.01133	0.0782487	0.003951
CG2893.c(modencode)	0.011864	0.0178663	0.00412185
CG2893.b(modencode)	0.0118237	0.0179523	0.00414073
rn.f(modencode)	0.0167715	0.196452	0.00416598
rn.d(modencode)	0.0168421	0.19649	0.00416612
CG13305.a(modencode)	0.0355666	0.0569628	0.00417428
CG13305-RB(modencode)	0.0436701	0.0571363	0.00423876
CG5758.c(modencode)	0.00878102	0.16065	0.00426637
CG5758-RB(modencode)	0.00880744	0.160591	0.00427812
CG5758-RA(modencode)	0.00877656	0.160847	0.00429407
Cyp6g1.a(modencode)	0.168808	0.184792	0.00431069
Cyp6g1-RA(modencode)	0.168443	0.179571	0.00433014
rn.b(modencode)	0.0162545	0.102442	0.00433849
CG5758.b(modencode)	0.00866205	0.160892	0.00440937
CG5758-RC(modencode)	0.00866283	0.160893	0.00441029
CG30438.b(modencode)	0.105005	0.028061	0.00445259
CG5758.a(modencode)	0.00871413	0.160993	0.00445293
lectin-24Db-RA(modencode)	0.0768644	0.0934962	0.0044649
noncoding_19262-MIP13990(modencode)	0.0315544	0.079962	0.00455538
CG31704-RA(modencode)	0.0246466	0.0649942	0.00456089
rn.k(modencode)	0.0106457	0.15249	0.00458274
CG31714-RB(modencode)	0.0839123	0.132878	0.00458672
nc_13463.a(modencode)	0.0257424	0.0866161	0.00468939
baz.b(modencode)	0.000231603	0.00533413	0.00477403
CG12025-RA(modencode)	0.0370174	0.0719993	0.00480996
CG9238.a(modencode)	0.010089	0.0597067	0.00501046
CG13305-RC(modencode)	0.042975	0.0576307	0.00501794
CG18107-RA(modencode)	0.174355	0.135307	0.00511355
dia-RB(modencode)	0.0291991	0.0306834	0.00519154
chr3RHet_2149578_2150160.0(modencode)	0.012701	0.0297017	0.00519482
CG31714-GH12004(modencode)	0.0801053	0.0839519	0.00521889
Nopp140.a(modencode)	0.0190195	0.0505301	0.00537815
Nopp140.b(modencode)	0.0190195	0.0506687	0.00537871
Nopp140-RB(modencode)	0.0195884	0.0748494	0.00543717
MTA1-like-RC(modencode)	0.0433971	0.157798	0.00545723
CG9238.b(modencode)	0.0101398	0.0599529	0.00546002
snmRNA:60Ca-RA(modencode)	0.0786429	0.102538	0.00553326
CG31235-RA(modencode)	0.0246151	0.0208577	0.00557312
dia.c(modencode)	0.0286566	0.0308149	0.00579914
Dystrophin-RH(modencode)	0.0122071	0.0330661	0.00580588
CG33777-RA(modencode)	0.0275173	0.0577128	0.00584191
MTA1-like.c(modencode)	0.0436693	0.157567	0.00590904
MTA1-like-RA(modencode)	0.0442896	0.105299	0.00593838
MTA1-like-RB(modencode)	0.0443632	0.105393	0.00593839
rl-RE73195(modencode)	0.0428408	0.0868422	0.00593907
MTA1-like.b(modencode)	0.0443633	0.105393	0.00593908
CG40191-RA(modencode)	0.00493943	0.0539089	0.00606338
Dystrophin-RA(modencode)	0.0121608	0.0337006	0.00612736
CG4562-RB(modencode)	0.0335966	0.113061	0.00618523
CG32278-RA(modencode)	0.0338402	0.0471043	0.00633866
tsl-RB(modencode)	0.0593887	0.116406	0.00673039
Taf1-RC(modencode)	0.022503	0.0726328	0.00682024
dia-RA(modencode)	0.0275099	0.0306598	0.00695616
CG7950-RB(modencode)	0.0659276	0.17265	0.0069582
CG34317-RA(modencode), CG7950-RA(modencode)	0.0659322	0.172924	0.0069582
se-RA(modencode)	0.0422205	0.0217258	0.00710833
CG40160.o(modencode)	0.00647807	0.0275507	0.00719315
CG40160.l(modencode)	0.00641354	0.0275456	0.00719432
Dystrophin-RC(modencode)	0.0113747	0.0383677	0.00730372
Taf1-RB(modencode)	0.0224828	0.0832869	0.00731696
lqf.f(modencode)	0.0091919	0.0298401	0.00735636
GV1.d(modencode)	0.0173577	0.00601709	0.00746696
dia.b(modencode)	0.0269866	0.0307931	0.00778323
CG32512-RA(modencode)	0.0831591	0.107547	0.00786111
Sug.a(modencode)	0.0050067	0.141186	0.00789079
CG40160.m(modencode), CG40160.n(modencode)	0.00559202	0.0294066	0.00796062
Taf1.a(modencode)	0.0225278	0.126801	0.00798848
CG40160.v(modencode)	0.0117528	0.0305802	0.00800395
CG40160.r(modencode)	0.0116046	0.0305744	0.00800443
CG13004.a(modencode)	0.0580746	0.142084	0.00817367
GstS1-RB(modencode)	0.0507688	0.00785604	0.00818701
GstS1.b(modencode)	0.0502232	0.00783417	0.0081871
GstS1-RC(modencode)	0.0508466	0.00784108	0.00818724
GstS1.c(modencode)	0.0503006	0.00781905	0.00818727
lqf.d(modencode)	0.00985161	0.0297453	0.00833455
CG40160.k(modencode)	0.00590452	0.0281325	0.0083701
Karl.a(modencode)	0.0858248	0.0958837	0.00838245
CG5357-RA(modencode)	0.111516	0.0689953	0.00840638
CG11796-RB(modencode)	0.061934	0.0210306	0.00856051
CG14117-RC(modencode)	0.0402855	0.0395293	0.0086766
CG14117.b(modencode)	0.0402826	0.0395333	0.00867714
CG14117.a(modencode)	0.0402697	0.0395289	0.0086773
CG14117-RB(modencode)	0.0402886	0.0395323	0.00867823
Karl-RB(modencode), Karl.b(modencode)	0.0871361	0.0961462	0.00869684
Sug-RD(modencode)	0.00472017	0.136551	0.00888739
Sug-RC(modencode)	0.0047293	0.138016	0.00888757
CG12269.b(modencode)	0.102112	0.0328396	0.00936517
Karl-RA(modencode)	0.0882613	0.0884663	0.00941663
CG4259.a(modencode)	0.146942	0.185766	0.00946623
CG10462-RA(modencode)	0.0814569	0.0573677	0.00947204
snoRNA:Psi28S-1153-RA(modencode)	0.15578	0.0925082	0.00948351
CG10462-RB(modencode)	0.0818489	0.0566785	0.00953934
CG10462.e(modencode)	0.0818498	0.0564982	0.00953956
CG10462-RC(modencode)	0.0818933	0.0562958	0.0095719
CG10462.b(modencode)	0.0813241	0.057689	0.00962222
CG10462.a(modencode)	0.0813251	0.0576919	0.00962261
CG8646.a(modencode)	0.0531689	0.0074403	0.00962828
tsl.a(modencode)	0.05566	0.11653	0.00968849
CG40191.e(modencode)	0.00399466	0.0691963	0.00977881
CG10462.g(modencode)	0.083317	0.057419	0.00978932
CG12269-RA(modencode)	0.0995544	0.0327061	0.00989975
ssp4.p(modencode)	0.0674717	0.109382	0.00990366
CG40160.t(modencode), CG40160.u(modencode)	0.0101297	0.0325601	0.00991426
CG8646-RB(modencode)	0.0527778	0.00744011	0.0100363
fbp.c(modencode)	0.0851593	0.0688814	0.0101173
CG5380-RA(modencode)	0.0824274	0.192014	0.0101939
eys.a(modencode), eys-RC(modencode)	0.0129987	0.124097	0.0102526
CG32372.a(modencode)	0.0658643	0.0316783	0.0103022
CG10462.d(modencode)	0.0822322	0.0526706	0.0103183
CG10462.c(modencode)	0.0822313	0.0527713	0.0103183
Idgf1-RA(modencode)	0.0707989	0.0313237	0.010323
CG10462.f(modencode)	0.081352	0.0577607	0.0103766
lqf-RD(modencode)	0.00876116	0.024576	0.0104072
CG40160.p(modencode)	0.0106696	0.0312651	0.0105618
CG40160.s(modencode)	0.0107575	0.0312265	0.0105905
CG10462.h(modencode)	0.0828826	0.0583152	0.0105958
CG10462.i(modencode)	0.082881	0.0581915	0.010596
CG32372-RA(modencode)	0.0657892	0.0318187	0.0106043
psq.x(modencode)	0.00948216	0.174543	0.0106559
CG40191.b(modencode)	0.00515762	0.0555605	0.0107009
CG40160.q(modencode)	0.0111414	0.031765	0.0107451
CG31304-RA(modencode)	0.00228831	0.167607	0.0108303
white.a(modencode)	0.00871671	0.0995121	0.0111703
Proct-RA(modencode)	0.068593	0.0341576	0.0114061
CG5181-RA(modencode)	0.0369754	0.12499	0.0115094
CG17768-RA(modencode), LSm-4-RB(modencode)	0.0287405	0.0377813	0.0115423
CG3600-RB(modencode)	0.14943	0.068752	0.01186
snoRNA:Or-CD9a-RA(modencode)	0.077078	0.102588	0.0119611
Pkc53E.f(modencode)	0.00344638	0.00916096	0.0120835
psq.k(modencode)	0.00957607	0.172779	0.0121162
white-RA(modencode)	0.0100854	0.102775	0.0123682
CG18428-RA(modencode)	0.0584206	0.0785875	0.0123844
CG13814-MIP22191(modencode)	0.0609729	0.00547678	0.0125126
CG40191-RB(modencode)	0.00467158	0.0546721	0.0127337
CG40191.a(modencode)	0.00515968	0.0555605	0.012783
CG6673-RA(modencode)	0.00994704	0.0217313	0.0128224
CG7394.a(modencode)	0.0102934	0.0314224	0.0128353
CG34188-IP17949(modencode)	0.00482796	0.0693548	0.0130433
Taf1-RA(modencode)	0.0290348	0.0676368	0.0131241
CG7394.b(modencode)	0.0104745	0.0312187	0.0133475
Taf1-RD(modencode)	0.0290192	0.0782595	0.0140576
nc_4006.b(modencode)	0.0717911	0.0176109	0.014058
CG8916-RC(modencode)	0.0424202	0.0390671	0.0144105
Dystrophin.d(modencode)	0.00119108	0.0402692	0.0144752
fbp-RB(modencode)	0.132819	0.068833	0.0147278
sick.a(modencode)	0.0306225	0.0227841	0.0149839
MRP.a(modencode)	0.00697402	0.0581536	0.0150107
CG15168-RA(modencode)	0.14749	0.18556	0.0152713
CG5508-MIP20663(modencode)	0.108453	0.138855	0.015367
rn.a(modencode)	0.0209821	0.108306	0.0155859
Dystrophin.c(modencode)	0.00189438	0.0368587	0.0163426
CG17760-RB(modencode)	0.00964527	0.0132342	0.016447
GRHR-RB(modencode)	0.110427	0.0587457	0.0165516
CG5508.a(modencode)	0.116638	0.151389	0.0168678
CG5508.b(modencode)	0.116403	0.15139	0.0168686
CG30115-RE(modencode)	0.0133303	0.0757187	0.0171994
CG30115.e(modencode)	0.0133571	0.0772328	0.0172026
CG5508.c(modencode)	0.115917	0.151316	0.0176118
CG30115.a(modencode)	0.0127177	0.0762192	0.0176599
CG15745-RA(modencode)	0.190736	0.106565	0.0178139
CG5508-RC(modencode)	0.116542	0.150999	0.0178176
CG3621-RA(modencode)	0.0919081	0.155492	0.0178569
CG5508-RB(modencode)	0.116603	0.150846	0.0178787
CG13532-RA(modencode)	0.0623755	0.0683237	0.0181646
Madm.b(modencode)	0.00978487	0.0121389	0.0185934
GRHR-RC(modencode)	0.113031	0.0490969	0.0191507
GRHR-RA(modencode)	0.113029	0.0488589	0.0191509
Act57B-RA(modencode)	0.138226	0.024174	0.0193687
Dystrophin.h(modencode)	0.00213738	0.036709	0.0194261
Dystrophin.i(modencode)	0.00213738	0.036709	0.0194261
CG15745-RB(modencode)	0.195822	0.100407	0.0195772
fbp.b(modencode)	0.155506	0.0687369	0.0206833
psq.v(modencode)	0.00787275	0.174029	0.020697
Pkc53E-RA(modencode)	0.00259312	0.00975238	0.0207074
Dystrophin.g(modencode)	0.00210116	0.0369647	0.0209355
CG1648-RB(modencode)	0.0978962	0.0172782	0.0212228
CG11347.d(modencode)	0.0284242	0.184533	0.0213098
sPLA2-RA(modencode)	0.0678576	0.0501353	0.021421
CG6405-RA(modencode)	0.00944081	0.0132939	0.022146
Dystrophin.f(modencode)	0.00184574	0.036722	0.0221636
CG5508-MIP21506(modencode)	0.116242	0.123234	0.0221735
Dbi-RA(modencode)	0.138905	0.0869642	0.0222924
Cyp6v1-RA(modencode)	0.0310481	0.0531152	0.0223896
Dbi-RB(modencode)	0.134876	0.0887888	0.0227313
CG13814.c(modencode)	0.0810346	0.0261548	0.0228569
Dystrophin-RE(modencode)	0.00146225	0.0367143	0.0228774
nc_19262.a(modencode)	0.0490264	0.184548	0.0229017
CG5508-RA(modencode)	0.115211	0.150679	0.0229105
Dystrophin.e(modencode)	0.00155287	0.0368615	0.0229159
CG11347.c(modencode)	0.0294218	0.179402	0.0229171
DmsR-1-RA(modencode)	0.0302839	0.0831655	0.0231534
white-GH19653(modencode)	0.00992339	0.103069	0.0232021
CG5955-RA(modencode)	0.0353691	0.178469	0.0235665
mRpL4-RA(modencode)	0.00813711	0.0412403	0.0235715
Rgk1.a(modencode)	0.0147636	0.16612	0.0246199
nc_12806.a(modencode)	0.0505219	0.166189	0.0249751
CG5508.d(modencode)	0.113439	0.150915	0.0252233
CG1958-RA(modencode)	0.0707835	0.162481	0.0258597
Pkc53E-RC(modencode)	0.00334504	0.0114673	0.0258985
CG34188-RA(modencode)	0.00748958	0.0669464	0.0261
CG2003.b(modencode)	0.0366738	0.110913	0.0263028
chrX_1539850_1540090.0(modencode)	0.064367	0.162618	0.0275163
CG13814.a(modencode)	0.0645613	0.0208642	0.0275202
chr2RHet_567653_568005.0(modencode)	0.0108447	0.0501048	0.0277941
CG30104-RA(modencode)	0.091235	0.0195392	0.0283872
CG8788.c(modencode)	0.0746621	0.0772581	0.028931
CG13814.b(modencode)	0.0655609	0.0214583	0.0292131
Dak1-IP15841(modencode)	0.0352354	0.121877	0.0292592
CG32368-RA(modencode)	0.030081	0.12953	0.0293336
CG11347.e(modencode)	0.0305726	0.188269	0.0300158
CG11347.b(modencode)	0.0305727	0.188268	0.030016
CG34326-RA(modencode)	0.00775196	0.0336875	0.0303276
Ir62a-RA(modencode)	0.150492	0.172433	0.0304893
CG33322-RA(modencode)	0.0207727	0.0414138	0.0304979
nc_21767.a(modencode)	0.00472702	0.00262176	0.0310215
SP71.z(modencode)	0.00879512	0.0115618	0.032086
SP71.t(modencode)	0.00875076	0.0127537	0.0320861
CG30104-RB(modencode)	0.107624	0.0194459	0.0321149
CG1648-RA(modencode)	0.104017	0.0180506	0.0323412
CG12025.a(modencode)	0.102138	0.0877819	0.0323524
Dak1-RA(modencode)	0.0407073	0.109004	0.0323704
SP71.l(modencode)	0.00908517	0.0112487	0.0324546
CG7900-RB(modencode)	0.107151	0.0136859	0.0325676
SP71.v(modencode)	0.00986065	0.0113836	0.0325808
Sld5-RC(modencode)	0.0410418	0.10887	0.0327475
Dak1-RB(modencode)	0.041042	0.108808	0.0327476
nc_15272.a(modencode)	0.0842485	0.0157769	0.0329042
Madm-RA(modencode)	0.00974619	0.0117469	0.033172
CG11347-RE(modencode)	0.0682951	0.162483	0.0333009
tefu-RB(modencode)	0.00256345	0.111432	0.0335055
chr2L_16982540_16983106.0(modencode)	0.144323	0.185246	0.033685
CG12901-RA(modencode)	0.0606989	0.158479	0.034272
Prx2540-1-RA(modencode)	0.12821	0.0503847	0.0346625
CG17490-RD(modencode)	0.0590949	0.0691677	0.0347974
CG15547.b(modencode)	0.0710622	0.105522	0.0351793
JhI-21-RA(modencode)	0.0363123	0.0364487	0.0352014
MIP09619(modencode)	0.00694791	0.0590144	0.0352989
CG15547.a(modencode)	0.0711014	0.0996211	0.0353604
tefu.b(modencode)	0.00274025	0.109283	0.0354262
spaw-RA(modencode)	0.0106501	0.0889417	0.035492
chr3R_1068928_1069512.0(modencode)	0.0952481	0.10239	0.0358444
SP71.e(modencode)	0.00825105	0.011147	0.0363592
lqf.a(modencode)	0.00899125	0.0193309	0.0367883
CG6175-RB(modencode)	0.0847568	0.0254845	0.0369409
JhI-21.a(modencode)	0.0368477	0.0362873	0.0371667
GH03581(modencode)	0.0373124	0.0524989	0.0371719
SelG-RA(modencode)	0.037312	0.0524985	0.0371731
JhI-21-RB(modencode)	0.0372293	0.0363776	0.0374161
vfl-RA(modencode)	0.0345669	0.136269	0.0375712
CG13373-RA(modencode)	0.0120623	0.192659	0.0379596
lqf.c(modencode)	0.00900794	0.0165449	0.0382533
sick-RC(modencode)	0.057804	0.0355863	0.0382979
SP71.p(modencode)	0.0103364	0.0121924	0.0390643
CG9362-RA(modencode)	0.00688692	0.0227237	0.0392421
SP71.ae(modencode)	0.0094081	0.0113076	0.0394777
SP71.w(modencode)	0.010277	0.0109223	0.0394874
CG8788.d(modencode)	0.0856559	0.0768865	0.0412947
CG17490-RC(modencode)	0.057179	0.0730023	0.0415464
Acp53C14c-RA(modencode)	0.0170413	0.129541	0.0440673
CG40191-MIP17132(modencode)	0.00440364	0.0402177	0.0442554
CG2003.a(modencode)	0.0358207	0.108148	0.0442589
CG5645-RA(modencode)	0.00933991	0.13171	0.0448497
CG18467-RA(modencode)	0.0328174	0.102386	0.0452163
CG13139.a(modencode)	0.0411794	0.062272	0.0456171
CG12433-IP10632(modencode)	0.0419777	0.177295	0.0456865
CG12433-RB(modencode)	0.0419777	0.177295	0.0456865
ca-RA(modencode)	0.0171481	0.0124989	0.0461607
Uhg3-RB(modencode)	0.0945468	0.0345252	0.0474749
rl-RA(modencode)	0.0436988	0.0708511	0.0476672
Adhr-RA(modencode), Adh-RF(modencode)	0.025309	0.0610259	0.0488333
CG13442-RA(modencode)	0.102481	0.0518566	0.0488644
CG32809-RB(modencode)	0.0909976	0.164702	0.0490338
CG32809.c(modencode)	0.0904574	0.165236	0.0491961
CG15005-RA(modencode)	0.0548724	0.127786	0.0492396
Cyp9h1-RA(modencode)	0.100944	0.183204	0.04964
CG4950-IP22154(modencode)	0.170749	0.0103139	0.05
CG4950-RB(modencode)	0.171531	0.0112867	0.0500814
Tis11.k(modencode)	0.0529195	0.121273	0.0502146
Adh-RH(modencode), Adhr-RB(modencode)	0.0314211	0.0610426	0.0519914
Zasp66-GM09210(modencode)	0.0279044	0.0900724	0.0524979
bnb-RB(modencode)	0.101836	0.124223	0.0541101
CG10006.b(modencode)	0.067753	0.043869	0.0541232
bnb-RC(modencode)	0.101849	0.124124	0.0541672
CG6175.b(modencode)	0.0840863	0.0277017	0.0541932
CG9906-RA(modencode)	0.0313033	0.121547	0.0544592
CG2767-RA(modencode)	0.0769428	0.18414	0.0544611
CG4644-RA(modencode)	0.0482528	0.0535095	0.0545633
bnb-RD(modencode)	0.101369	0.122376	0.0554928
CG11152-RA(modencode)	0.0619207	0.187697	0.0558147
CG15719-RB(modencode)	0.066542	0.133565	0.0560873
bnb-RA(modencode)	0.101384	0.120926	0.0562177
CG8195-RA(modencode)	0.0431737	0.0640141	0.0568004
nc_23300.a(modencode)	0.0241703	0.109994	0.0582224
CG11221.a(modencode)	0.034862	0.0507709	0.0595514
CG31627-RB(modencode)	0.00364139	0.0562984	0.0619704
CG33475-RA(modencode)	0.0253046	0.0570239	0.0626986
CG1648.d(modencode)	0.134192	0.0356316	0.064809
CG6108-RA(modencode)	0.00338167	0.0299429	0.0661683
nAcRalpha-30D-RF(modencode)	0.0325366	0.0216017	0.0664327
Adh-RC(modencode)	0.0257478	0.061024	0.0675875
CG12640-RA(modencode)	0.0755025	0.0384351	0.0693093
SP71.x(modencode)	0.00973885	0.0115615	0.0698055
SP71.r(modencode)	0.00970427	0.0127538	0.0698117
SP71.k(modencode)	0.0100467	0.0112492	0.0704917
Adh-RE(modencode)	0.032285	0.0610412	0.0718249
SP71.u(modencode)	0.0108746	0.0113834	0.072003
SP71.y(modencode)	0.0095986	0.011663	0.0723689
SP71.s(modencode)	0.00956022	0.0128802	0.0723785
snoRNA:Me28S-G1083b-RA(modencode)	0.0194637	0.0661902	0.0738543
SP71.j(modencode)	0.0107575	0.0114615	0.0749995
CG13373-RB(modencode)	0.0244981	0.122967	0.0752463
CG9548-RA(modencode)	0.113748	0.105426	0.0766982
SP71.m(modencode)	0.0097317	0.0116626	0.0778922
SP71.q(modencode)	0.009694	0.0128859	0.0778936
CG9747.a(modencode)	0.0123191	0.0282305	0.0782543
CG9747.b(modencode)	0.0111458	0.0289858	0.0782689
SP71.f(modencode)	0.0100515	0.0113299	0.0785813
SP71.o(modencode)	0.00947986	0.0128854	0.0786123
CG9747-RA(modencode)	0.0124418	0.0279184	0.0792184
SP71.g(modencode)	0.00980099	0.01133	0.079323
SP71.n(modencode)	0.00946209	0.0111483	0.0795505
SP71.h(modencode)	0.0109553	0.0114621	0.0804621
SP71.i(modencode)	0.0106199	0.0114615	0.0814868
SP71.ab(modencode)	0.0102993	0.0113078	0.0819999
CG13471-RA(modencode)	0.00566738	0.0685799	0.083511
chr3L_15091617_15091865.0(modencode)	0.028427	0.171574	0.0837015
SP71.ad(modencode)	0.0101768	0.0113881	0.0849865
CG13526-RA(modencode)	0.119747	0.0289008	0.0862037
CG9517-RA(modencode)	0.0923729	0.101311	0.087322
CG9517-RB(modencode)	0.0923644	0.122262	0.0873321
CG14024-RA(modencode)	0.134879	0.176981	0.0889005
CG9536-RA(modencode)	0.0125786	0.078606	0.0892747
CG13999-RA(modencode)	0.0927781	0.0663568	0.0903617
SP71.aa(modencode)	0.0103381	0.0113879	0.0908023
CG9536.a(modencode)	0.0125785	0.0803377	0.0908291
SP71.ac(modencode)	0.0100343	0.0113882	0.0917242
CG8788-RA(modencode)	0.0940927	0.0779915	0.0930621
ire-1.b(modencode)	0.019801	0.0429361	0.0932245
CG13526-AT13807(modencode)	0.126017	0.0289104	0.0933965
CG1648.c(modencode)	0.142906	0.0369814	0.0936387
CG8788.a(modencode)	0.0962704	0.0770643	0.0939865
CG8788.g(modencode)	0.0958253	0.0775696	0.0942934
CG4661-RA(modencode)	0.00603908	0.159459	0.0943813
Dgk-IP06426(modencode)	0.0369208	0.0317496	0.0948661
CG8788.b(modencode)	0.0958629	0.0770221	0.0954088
CG8788.e(modencode)	0.0954171	0.0775933	0.0957357
CG15096-RB(modencode)	0.179925	0.0300071	0.0962557
caz-RB(modencode)	0.0415483	0.0720516	0.0971536
noncoding_13785-MIP08568(modencode)	0.191226	0.0877161	0.101293
Drep-4-RA(modencode)	0.0277813	0.0604637	0.101695
nc_13785.a(modencode)	0.19024	0.0922851	0.103269
CG13248.a(modencode)	0.0102185	0.0970849	0.103445
CG15709.a(modencode)	0.0308738	0.0321979	0.103864
Dystrophin.o(modencode)	0.0107347	0.119486	0.10445
chr3R_10083762_10084103.0(modencode)	0.195604	0.0677138	0.104494
nAcRalpha-30D-RC(modencode)	0.0364071	0.0724733	0.105055
CG10584-RA(modencode)	0.00228268	0.13786	0.107119
snoRNA:660-RA(modencode)	0.170922	0.115667	0.108809
p130CAS-RB(modencode)	0.0178715	0.00677797	0.110359
p130CAS-RF(modencode)	0.0178713	0.00677797	0.11036
nAcRalpha-30D-RD(modencode)	0.0360791	0.0722414	0.111008
p130CAS-RD(modencode)	0.0155238	0.00663756	0.111253
SD23414(modencode)	0.120101	0.132729	0.111948
p130CAS-RE(modencode)	0.0181202	0.00678431	0.112634
mir-281aS-RA(modencode)	0.0590633	0.0465776	0.113625
rdgA-RB(modencode)	0.054911	0.143332	0.116157
SP71.c(modencode)	0.00857188	0.0140311	0.117018
nonA-l-RA(modencode)	0.00919256	0.0246935	0.117622
nAcRalpha-30D-RA(modencode)	0.035419	0.071902	0.119311
CG31036-RA(modencode)	0.0151427	0.0748178	0.120458
CG40160.j(modencode)	0.0301739	0.0312259	0.12141
norpA.i(modencode)	0.0610123	0.14025	0.12665
CG40160-RD(modencode)	0.0322831	0.0313236	0.126726
norpA.g(modencode)	0.0610464	0.140213	0.128287
CG10570-RA(modencode), CG42502-RA(modencode)	0.00844255	0.0799437	0.12917
CG40160-RF(modencode)	0.0326331	0.0313288	0.129234
MB6.chr2R.pasa.4767.a(modencode)	0.106251	0.0635823	0.129422
sPLA2-RB(modencode)	0.0621455	0.0548633	0.130914
CG15067.a(modencode)	0.17844	0.0299179	0.132485
chrU_216396_216935.0(modencode)	0.0165234	0.056074	0.134212
Rassf-RA(modencode)	0.0418225	0.112664	0.135364
sPLA2-RC(modencode)	0.093473	0.0734948	0.139509
CG42260.an(modencode)	0.0776203	0.181925	0.140335
CG40160.i(modencode)	0.0274129	0.0319288	0.14092
CG40160.h(modencode), CG40160-RE(modencode)	0.0265625	0.0333291	0.143549
CG40160.a(modencode)	0.029016	0.0320302	0.14618
CG31526.a(modencode)	0.00556059	0.14568	0.1462
CG31526-RA(modencode)	0.00556041	0.145693	0.1462
SP71-RA(modencode)	0.00926884	0.0118742	0.146696
CG40160.g(modencode)	0.0341395	0.0307684	0.15518
CG5532-RA(modencode)	0.043292	0.133777	0.155986
jumu-RA(modencode)	0.0349582	0.00722767	0.156593
CG9902.a(modencode)	0.000693874	0.0517073	0.159269
Nplp3.a(modencode)	0.0292572	0.0230763	0.159582
CG40160.e(modencode)	0.035075	0.0305775	0.15981
Nplp3-RA(modencode)	0.0292266	0.0233865	0.160471
nc_6835.a(modencode), Uhg5-RC(modencode)	0.0642092	0.0625208	0.16267
CG40160.f(modencode)	0.0364944	0.0306816	0.164682
CG42260.r(modencode)	0.0981056	0.155648	0.165449
Cng-RA(modencode)	0.0301148	0.0373783	0.169145
CG40160.b(modencode)	0.0332458	0.0306731	0.181438
CG40160-RA(modencode)	0.0364473	0.0307705	0.181576
CG42260.l(modencode)	0.0598652	0.176438	0.182359
CG40160.c(modencode)	0.0311686	0.0325327	0.184251
CG42260.ao(modencode)	0.0922557	0.174515	0.187555
CG4884-MIP05919(modencode)	0.0259626	0.0501952	0.193213
CG5978-RA(modencode)	0.0162547	0.0623949	0.194781
CG40160.d(modencode)	0.0479651	0.0321863	0.195028
CG42260.c(modencode)	0.0618015	0.116671	0.19833
SP71.d(modencode)	0.00852832	0.0141187	0.198765
CG4278-RA(modencode)	0.0151417	0.0852655	0.199773
chr4_562927_563318.0(modencode)	0.0820122	0.0908415	0.204556
SP71.a(modencode)	0.00881983	0.0141198	0.207252
SP71.b(modencode)	0.00858699	0.0137961	0.208843
HERC2-RC(modencode)	0.0848425	0.0792612	0.214014
Cpr97Eb.a(modencode)	0.0351339	0.197823	0.214906
Rgk1-RB(modencode)	0.0092103	0.102592	0.218093
MED1-RA(modencode)	0.0309884	0.0186563	0.220278
MED1.d(modencode)	0.0309978	0.018659	0.220305
CG5945-RA(modencode)	0.0980987	0.0968875	0.220307
SP71-RB(modencode)	0.0085836	0.013794	0.224179
CG11221-RA(modencode)	0.0420273	0.039604	0.225152
CG32792.a(modencode)	0.00645085	0.106691	0.229112
CG32792-RF(modencode)	0.0067366	0.105654	0.229142
nc_3109.a(modencode)	0.0520808	0.144237	0.229315
CG6209.a(modencode)	0.151979	0.197699	0.229738
agt-RA(modencode)	0.0604491	0.117464	0.230944
CG30386.a(modencode)	0.0144524	0.165748	0.233247
psq.w(modencode)	0.0076678	0.174446	0.233477
CG33640.a(modencode)	0.00284751	0.084939	0.234233
CG33640-RA(modencode)	0.00309318	0.0940577	0.234241
CG4783.a(modencode)	0.195473	0.00950766	0.235816
CG42260.au(modencode)	0.0692018	0.101022	0.236165
tefu.a(modencode)	0.0037059	0.072629	0.23649
retinin-RA(modencode)	0.079745	0.00996043	0.237253
CG3797.a(modencode)	0.0503238	0.086703	0.239639
CG3797-RA(modencode)	0.0503655	0.0887882	0.239642
CG33797-RA(modencode)	0.0756581	0.139247	0.240385
Cka.c(modencode)	0.0494651	0.122902	0.242996
Oli-RA(modencode)	0.0509883	0.191344	0.245313
CG15398-RB(modencode)	0.178996	0.0669636	0.245767
Cka-RB(modencode)	0.0489321	0.12309	0.245781
ligatin.a(modencode)	0.0291025	0.100954	0.245781
Cka.b(modencode)	0.0489318	0.12302	0.245781
ligatin-RA(modencode)	0.029362	0.100683	0.24579
Hdc.d(modencode)	0.00364704	0.0309187	0.246361
Hdc.b(modencode)	0.00368041	0.0307386	0.246364
Or82a-RA(modencode)	0.106379	0.164908	0.248626
Chd64.a(modencode)	0.0169394	0.0797417	0.250077
Hdc.c(modencode)	0.00365549	0.0306596	0.251853
Cka-RD(modencode)	0.050795	0.123654	0.259212
Hdc.a(modencode)	0.00360992	0.030588	0.26213
Hdc-RA(modencode)	0.00363002	0.0305882	0.263299
Hsp60-RB(modencode)	0.0914133	0.0820859	0.266912
Hsp60.a(modencode)	0.0913996	0.0819976	0.266912
Hsp60-RA(modencode)	0.0907633	0.0823359	0.268159
Chd64-RB(modencode)	0.0172255	0.0793489	0.268783
Ir51b-RA(modencode)	0.000653558	0.171034	0.271469
CG34415-MIP10780(modencode)	0.00909778	0.0158465	0.27925
SuUR-RA(modencode)	0.0295439	0.099317	0.281693
CG33310-RA(modencode)	0.0725991	0.0529985	0.288708
Cka.d(modencode)	0.0479055	0.128836	0.291624
nc_18134.a(modencode)	0.0404689	0.15712	0.292801
whip-RA(modencode)	0.0821992	0.0474065	0.293956
CG32193-RA(modencode)	0.131183	0.0775582	0.300096
CG9902.b(modencode)	0.00113311	0.195081	0.301128
chr2R_6247724_6248259.0(modencode)	0.122495	0.0841925	0.30364
CG9812-MIP16064(modencode)	0.134312	0.0595171	0.307286
Cka.e(modencode)	0.0512981	0.123876	0.3073
chr2RHet_395268_395614.0(modencode)	0.00429599	0.00485428	0.309051
CG6359-RA(modencode)	0.016536	0.0791949	0.310112
CG6359.a(modencode)	0.0164543	0.0799562	0.310793
CG6359.c(modencode)	0.0163593	0.0806109	0.311128
CG6359.b(modencode)	0.0170552	0.0781628	0.311853
CG34051-RA(modencode)	0.0166587	0.00876988	0.313627
hubl-FI11533(modencode)	0.00840795	0.118769	0.313628
nc_10027.a(modencode)	0.0698048	0.0275561	0.317309
GstD1-RB(modencode)	0.179499	0.0192297	0.321491
CG11802-RA(modencode)	0.0934202	0.0319378	0.325518
GstD1-RA(modencode)	0.179488	0.0190931	0.325913
GstD1.a(modencode)	0.179488	0.0191829	0.326204
Hairless.a(modencode)	0.0313653	0.00539041	0.327065
CG8866-RA(modencode)	0.013501	0.0573444	0.33082
CG13482-RA(modencode)	0.106246	0.173606	0.331993
Hairless-RB(modencode)	0.0331811	0.00581797	0.332755
Cka-RC(modencode)	0.0484019	0.134327	0.333273
Cka.a(modencode)	0.0486476	0.134189	0.333513
Or45b-RA(modencode)	0.000233225	0.157157
Or45b.a(modencode)	0.000375642	0.0654278
CG6472.a(modencode)	0.00562986	0.0932486
CHORD-RA(modencode)	0.0223311	0.183872
snoRNA:Psi28S-3305b-RA(modencode)	0.0337853	0.179384
snmRNA:60Cb-RA(modencode)	0.0664472	0.0618664
CG4066-RA(modencode)	0.0347944	0.0770793
snoRNA:Or-CD9b-RA(modencode)	0.0632509	0.0577049
Pms2-RA(modencode)	0.00310086	0.00943561
Pms2.a(modencode)	0.00304642	0.009418
CG42345-RF(modencode)	0.00902307	0.0311963
CG32251-RA(modencode)	0.0348989	0.0725342
rn.j(modencode)	0.0132645	0.156303
CG42345-RA(modencode)	0.0139309	0.0350831
CG42345.c(modencode)	0.014522	0.0346616
Mur11Da-RC(modencode)	0.184146	0.162122
snoRNA:Me28S-U1848-RA(modencode)	0.0791734	0.189538
Or83a.a(modencode)	0.0355083	0.104194
CG13139.d(modencode)	0.0378283	0.05754
CG13139.e(modencode)	0.0378289	0.0579408
CG13139.c(modencode)	0.0378283	0.0575404
CG13139.f(modencode)	0.0385484	0.0586584
CG34398-IP03621(modencode)	0.0784976	0.0603237
CG30438.a(modencode)	0.14876	0.0367723
CG9812.a(modencode)	0.11552	0.0539289
CG18622-MIP16336(modencode)	0.0495243	0.0584074
CG7255-RG(modencode)	0.0788949	0.0210529
CG13272.c(modencode)	0.0341796	0.0303039
CG13272.a(modencode)	0.033761	0.0297317
CG13272.b(modencode)	0.0339017	0.0303161
CG13272-RA(modencode)	0.0339035	0.0303076
Notum-RB(modencode)	0.0261544	0.079106
Notum-RA(modencode)	0.0261575	0.0790703
CG30438.c(modencode)	0.0741842	0.0284464
CG30438-RC(modencode)	0.0731243	0.0286601
CG32591-RA(modencode)	0.0624559	0.0162518
CG30101.b(modencode)	0.0106607	0.0271112
CG30101.d(modencode)	0.0106606	0.0271578
CG30101.a(modencode)	0.0105649	0.0267188
CG30101.c(modencode)	0.009218	0.0311674
CG4476-RB(modencode)	0.00912546	0.010815
CG33673.a(modencode)	0.00114153	0.119978
CG8757.a(modencode)	0.0044324	0.00848606
