# Supplementary material for: Deep sequencing the circadian and diurnal transcriptome ofDrosophilabrain
Source: HighWire-hosted journal article supplement (doi:10.1101/gr.128876.111), 2012-04-03
Supplement: Table_S5.xlsx [file Table_S5.xlsx]

## Sheet: Sheet1
Gene Symbol	probe	genotype p-value	genotype q-value
Tequila	141527_at	7.28709e-19	4.98211e-15
Cyp6a2	143127_at	1.71487e-16	3.89548e-13
dia	143636_at	1.45146e-12	4.39197e-10
Hdc	143557_at	5.61437e-11	8.3911e-09
CG15005	148152_at	1.03572e-10	1.42151e-08
CG9812	147775_at	1.7149e-09	1.42202e-07
Cyp9h1	147119_at	2.51976e-09	1.88799e-07
CG8974	152551_at	2.80074e-09	2.02852e-07
CG30104	151726_at	6.92947e-09	4.28896e-07
Tom34	141789_at	1.36051e-08	7.54911e-07
CG9813	152586_at	1.5862e-08	8.56966e-07
CG7607	148564_at	2.0863e-08	1.06695e-06
CG15209	144829_at	2.16825e-08	1.09932e-06
GstE1	152598_at	4.59898e-08	1.99359e-06
Fps85D	143164_at	4.89408e-08	2.09618e-06
CG4259	145620_at	5.51625e-08	2.31152e-06
CG9747	152137_at	9.43934e-08	3.61745e-06
CG6357	153233_at	1.82178e-07	6.07881e-06
CG10924	147444_at	2.01702e-07	6.57382e-06
UGP	153782_at	2.71283e-07	8.37547e-06
CG6870	146413_at	2.75517e-07	8.499e-06
Idgf1	152721_at	3.64706e-07	1.05568e-05
CG10444	141290_at	7.33255e-07	1.84433e-05
CG12256	149741_at	1.05894e-06	2.46699e-05
CG14495	147408_at	1.16494e-06	2.63961e-05
CG31235	150132_at	1.29964e-06	2.89173e-05
Hsp60	141664_at	1.74616e-06	3.66415e-05
CG15096	153069_at	1.80088e-06	3.74589e-05
CG13605	142908_at	2.30615e-06	4.61478e-05
CG8321	155001_at	3.9881e-06	7.12945e-05
Dbi	143608_at	4.99042e-06	8.38908e-05
CG31352	141482_at	6.94619e-06	0.000107886
Cyp12c1	152798_at	9.19077e-06	0.000134777
Cyp28d1	152866_at	1.50957e-05	0.000203142
CG1648	152817_at	1.5275e-05	0.000205428
CG4393	150442_at	1.69813e-05	0.000224626
Irk3	146449_at	1.76825e-05	0.000232401
l(2)tid	141787_at	1.80797e-05	0.0002368
l(1)G0196	142149_at	1.90865e-05	0.000247661
CG9238	148753_at	2.33831e-05	0.000293007
CG9536	141272_at	2.41564e-05	0.000301146
Cyp4ac3	153384_at	2.58259e-05	0.000317125
CG5160	145953_at	3.36106e-05	0.000390192
CG5532	142462_at	3.47035e-05	0.000399852
l(2)k09913	153849_at	3.54501e-05	0.000406784
fbp	151797_at	4.20253e-05	0.000462325
CG2767	154286_at	4.77277e-05	0.00050856
norpA	151504_i_at	5.84612e-05	0.000589922
GC	142275_at	6.20844e-05	0.000617133
CG15067	147433_at	7.03643e-05	0.000676975
IM2	144068_at	7.67361e-05	0.000720924
Zasp66	152762_at	8.14233e-05	0.000755795
CG14329	150085_at	8.19267e-05	0.000759455
SelG	151923_at	0.000101601	0.000910191
Cyp4p3	146873_at	0.000104018	0.000927982
CG7900	149474_at	0.000110626	0.00097588
Fhos	154230_at	0.000149187	0.00124355
CG32412	152356_at	0.000189707	0.00151169
CG13284	146386_at	0.000209537	0.00163611
baz	143083_at	0.00022127	0.0017074
CG6680	153042_at	0.000246579	0.0018556
Dhpr	148447_at	0.000255143	0.00190428
cry	152673_at	0.000259324	0.00192779
CG5955	152732_at	0.000263575	0.00195149
CG30101	142742_at	0.000265863	0.00196417
CG30359	151539_at	0.000275306	0.00201593
CG6665	141562_at	0.000310177	0.00220124
Pax	141605_at	0.00032646	0.00228547
TepIV	146503_at	0.000337561	0.00234411
Spn43Ab	146724_at	0.000348462	0.00240078
CG4408	154956_at	0.000357477	0.00244906
CG15611	153265_at	0.000373348	0.0025328
CG7777	154391_at	0.000388284	0.00261012
CG2680	144046_at	0.000441332	0.00287371
eater	150710_at	0.00044155	0.00287476
sage	149545_at	0.000469238	0.00300584
CG32444	149196_at	0.000503577	0.00316267
CG14024	152406_at	0.000606369	0.00362585
CG11407	152819_at	0.000677823	0.00394735
tsl	143387_at	0.000798576	0.0044783
Act57B	153531_at	0.00093068	0.00502184
Cyp4p1	143782_at	0.000953093	0.00511001
CG6293	154546_at	0.00100554	0.00531201
Rab14	154487_at	0.00101313	0.00534072
eys	153379_at	0.00102764	0.00539535
CG7224	152727_at	0.00105327	0.00549074
CG6125	149957_at	0.00110065	0.00567018
CG5888	152162_at	0.00164311	0.00757973
rn	149440_at	0.00169205	0.00773772
CG1773	153075_at	0.00183625	0.00823149
CG30344	152905_at	0.00191282	0.00848867
Pis	145141_at	0.00222409	0.00949476
CG7149	152382_at	0.00232335	0.00980685
lqf	153065_at	0.00245187	0.0102007
CG6836	153003_at	0.0024532	0.0102047
CG4484	148450_at	0.00256413	0.0105355
Sug	153223_at	0.00294464	0.0116113
CG11347	153082_at	0.00343567	0.0129335
CG3600	144117_at	0.00379323	0.0138487
SPR	144523_at	0.00397243	0.0142873
CG3621	144105_at	0.00409877	0.0145947
CG12025	148010_at	0.00439918	0.0153056
tw	141313_at	0.00478826	0.0162344
p130CAS	151870_at	0.00491531	0.0165315
phyl	143714_at	0.00515788	0.0171105
Cka	154958_at	0.00529754	0.0174368
CG15745	144998_at	0.00539972	0.0176723
CG10462	141680_at	0.0054886	0.017875
mRpL4	154655_at	0.00625754	0.0197345
MRP	141704_at	0.0066324	0.0206007
Pitslre	152617_at	0.00664366	0.0206263
HERC2	145422_at	0.0069863	0.0213948
CG7394	148583_at	0.0069883	0.0213992
vfl	145397_at	0.00718729	0.0218359
Or83a	149328_at	0.00736367	0.0222172
Pkc53E	151905_at	0.00768856	0.0229061
GstS1	153990_at	0.00857985	0.0247386
CG15443	145763_at	0.00883785	0.0252617
CG7137	153734_at	0.00923676	0.0260544
Taf1	143601_at	0.00981867	0.0271741
Tis11	142170_at	0.00991054	0.027347
CG8272	146840_at	0.01043	0.028306
Nplp3	148877_at	0.0105783	0.0285738
pnt	142193_at	0.010627	0.0286612
CG18327	147188_at	0.0109651	0.0292611
CG9272	146565_at	0.011034	0.0293818
CG13108	146072_at	0.0115099	0.030251
CG10584	149162_at	0.0116459	0.0305052
GV1	148005_at	0.0118517	0.0308865
CG14757	146793_at	0.0121526	0.0314525
ana1	153609_at	0.0122597	0.031653
sPLA2	146740_at	0.0125035	0.0321056
CG18107	147432_at	0.0131684	0.0333151
CG6472	147339_at	0.0136173	0.0341118
CG10513	152513_at	0.0144531	0.035554
fu12	144153_at	0.0145224	0.0356713
CG4278	154440_at	0.0145418	0.035704
CG15210	151323_at	0.0176272	0.0405886
fln	153029_at	0.0183234	0.0416712
CG8195	153053_at	0.0191942	0.0430004
CG3894	147889_at	0.0219378	0.0469732
CG5181	145954_at	0.0221294	0.0472404
CG18467	147362_at	0.0224267	0.0476516
CG18343	147055_at	0.0227964	0.0481578
sick	146517_at	0.0229792	0.0484058
CG6673	151667_s_at	0.0229889	0.048419
Tapdelta	153279_at	0.0252624	0.0515127
CG15012	151896_at	0.0256002	0.0519785
CG34353	150751_at	0.0258738	0.0523694
CG11299	154871_at	0.0267642	0.053634
GstD9	149755_at	0.0273696	0.0544796
CG6023	145294_at	0.027376	0.0544884
CG5508	152088_at	0.0276453	0.0548609
CG4783	150233_at	0.0295176	0.0573904
Cpr97Eb	150707_at	0.030054	0.0580963
Cyp12a4	150181_at	0.0317731	0.0603049
CG42249	144847_at	0.0349751	0.0643728
Tsp42Ek	146714_at	0.0370933	0.0670178
CG15168	146463_at	0.0435017	0.0745107
se	148411_at	0.0440353	0.0751158
CG18428	150481_at	0.0458693	0.077158
Mbs	152655_at	0.0461525	0.0774683
CG1311	148163_at	0.0479102	0.079365
UbcD4	154399_at	0.0497227	0.0813143
CG34398	142308_at	0.0501352	0.0817532
capa	153068_at	0.0508358	0.082493
robo3	145572_at	0.0527721	0.084508
spir	141784_at	0.0540704	0.0858307
CG15398	145659_at	0.0597035	0.091312
GNBP1	149005_at	0.060136	0.0917164
l(2)01289	146690_at	0.0608641	0.092392
CG11697	144885_at	0.0644726	0.095649
CG13999	145856_at	0.0650015	0.0961141
CG8788	146868_at	0.0656764	0.096703
Proct	145990_at	0.0695532	0.100116
CG8192	153587_at	0.0719196	0.102126
CG17928	146376_at	0.0741197	0.103947
CG4884	150761_at	0.0751709	0.104801
Ppn	142182_s_at	0.0780447	0.107085
Ilp3	148492_at	0.0793474	0.108097
CG33322	146552_at	0.0799771	0.108599
Dgk	143482_at	0.0803547	0.108905
CG11400	147353_at	0.0811676	0.109559
CG13482	148747_at	0.0816352	0.109933
CG31674	142595_at	0.0833087	0.111256
CG13814	149108_at	0.0837309	0.111598
CG9904	144412_at	0.0849504	0.112579
CG14117	148688_at	0.0875329	0.11462
CG4476	148451_at	0.0889174	0.115706
Rcd2	149139_at	0.0896615	0.116306
Mis12	148294_at	0.0939705	0.11971
CG31036	150857_at	0.0989424	0.123488
CG1958	144643_at	0.100669	0.124765
CG32809	144055_at	0.111584	0.132439
CG13305	148418_at	0.114043	0.13408
S1P	149193_at	0.116635	0.135775
CG13373	144343_at	0.118698	0.137101
CG13890	147946_at	0.120425	0.138325
CG6209	147163_at	0.121081	0.1388
retinin	152610_at	0.121288	0.138949
Gpdh	153347_at	0.121721	0.139261
CG32278	153014_at	0.132055	0.146467
CG30115	147446_at	0.132166	0.146542
CG13360	141420_at	0.135227	0.14859
CG32372	148343_at	0.135833	0.148992
CG5380	150356_at	0.137832	0.150335
sug	154772_at	0.146507	0.156134
Nop60B	153235_at	0.147316	0.156661
CG5978	154257_at	0.15304	0.160329
CG6983	153282_at	0.155571	0.161916
CG5357	147777_at	0.156484	0.162484
CG42324	148116_at	0.156861	0.162719
GstD1	143184_at	0.157116	0.162876
CG12818	149629_at	0.16018	0.164762
CG6981	141349_at	0.160761	0.165116
CG7272	148804_at	0.164299	0.16725
CG3835	152717_at	0.164459	0.167346
Cyp6g1	152900_at	0.165199	0.167787
CG4950	148860_at	0.165733	0.168105
CG34415	147342_at	0.169442	0.170287
CG42260	147711_at	0.169988	0.170604
nonA	143440_at	0.170049	0.17064
CG9548	145902_at	0.175945	0.174017
rec	151050_at	0.179608	0.176066
CG8757	148724_at	0.185627	0.179355
CG5758	146426_at	0.188626	0.18096
MED1	152928_at	0.192704	0.183105
CG2107	141480_at	0.193952	0.183762
hdc	155065_at	0.194558	0.184111
CG32512	145456_at	0.197932	0.18604
CG9391	142335_at	0.198544	0.186387
Clk	143970_at	0.212793	0.194384
ald	153521_at	0.217836	0.197167
psq	154654_at	0.223398	0.200178
CG2816	145734_at	0.24134	0.209542
SuUR	153797_at	0.244937	0.211479
Drs	143605_at	0.246205	0.212156
CG1962	154941_at	0.246323	0.212219
CG12433	145224_at	0.248578	0.213417
ca	141610_at	0.259362	0.219033
Cng	147292_at	0.261195	0.219969
CG6353	150318_at	0.262519	0.220642
tefu	149942_at	0.263343	0.22106
Pli	154889_at	0.263814	0.221298
CG6359	142180_at	0.273465	0.226106
CG9486	145881_at	0.285013	0.231907
Kul	150840_at	0.288997	0.233982
CG5867	152013_at	0.289973	0.234487
CG13442	147572_at	0.291684	0.23537
CG9634	154010_at	0.298893	0.239049
CG15547	142227_at	0.299642	0.239428
spaw	146803_at	0.30433	0.241781
CG34398	151423_at	0.315661	0.247359
CG5645	153460_at	0.342173	0.260415
CG8646	147111_at	0.345459	0.26199
CG6129	150483_at	0.345519	0.262018
CG11699	144883_at	0.355556	0.266759
CG9948	153586_at	0.374295	0.275356
ssp4	155006_at	0.375574	0.275931
CG4933	148887_at	0.376549	0.276368
Chd64	153092_at	0.378625	0.277297
Mef2	153628_at	0.385335	0.28027
CG31714	146120_at	0.393626	0.28393
Oli	152704_at	0.396581	0.285226
CG10006	148775_at	0.398576	0.286098
caz	142484_at	0.404087	0.288486
CG9906	145189_at	0.408897	0.29055
Cry	143571_at	0.409075	0.290625
Gadd45	146727_at	0.424904	0.29728
CG14441	144612_at	0.426717	0.298029
bnb	152418_at	0.438262	0.30274
CG1635	155089_at	0.443813	0.304969
CG4409	147310_at	0.44711	0.306281
CG14253	150696_at	0.473275	0.316783
CG17361	148737_at	0.478445	0.31894
dnr1	147683_at	0.480247	0.319691
CG14963	148084_at	0.485361	0.321812
agt	144029_at	0.491715	0.324424
Notum	148840_at	0.497306	0.326702
CG4661	144969_at	0.505137	0.329858
CG4066	149749_at	0.506542	0.330421
CG5715	150500_at	0.507111	0.330648
CG11406	147844_at	0.50971	0.331684
CG6175	148568_at	0.511604	0.332437
CG13526	147710_at	0.517146	0.334627
CG3225	153729_at	0.520697	0.33602
CG13822	142671_at	0.521489	0.33633
CG13282	146384_at	0.534088	0.341208
CG13272	146380_at	0.535138	0.341614
CG4847	151800_at	0.546387	0.345933
crm	154489_at	0.552811	0.348367
Mdr65	143476_at	0.581028	0.358797
CG8866	142403_at	0.595525	0.363994
CG4367	150251_at	0.598764	0.365141
CG11221	145923_at	0.600947	0.36591
CG9517	145086_at	0.605568	0.367532
Hydr2	153610_at	0.615975	0.371198
Gbeta76C	153427_at	0.627252	0.375124
Rassf	150427_at	0.627325	0.375149
CG13248	149124_at	0.636429	0.378275
Ald	154814_at	0.636463	0.378287
ics	155040_at	0.639198	0.379218
CG13375	144340_at	0.647621	0.382066
Nopp140	153819_at	0.651208	0.383269
CG5945	146323_at	0.655253	0.384619
CG2807	145538_at	0.658949	0.385847
CG9362	141293_at	0.663947	0.387531
Or45b	146889_at	0.672769	0.390601
Rgk1	147490_at	0.672789	0.390608
CG6108	146326_at	0.673098	0.390715
CG15449	145452_at	0.684829	0.394754
CG17760	147106_at	0.691154	0.396953
CG15719	144977_at	0.696089	0.398658
Patsas	152643_at	0.712334	0.404201
CG16926	141315_at	0.713364	0.404549
CdsA	153377_at	0.733338	0.411218
Madm	144182_at	0.737458	0.412575
CG7255	141761_at	0.739215	0.413152
Kmn1	144884_at	0.744365	0.414836
CG9902	153342_at	0.744905	0.415012
Karl	141696_at	0.789762	0.429275
CG12269	142866_at	0.791229	0.42973
Cyp6v1	145437_at	0.794247	0.430664
CG17568	146482_at	0.801286	0.432828
Invadolysin	149618_at	0.806355	0.434377
jumu	154293_at	0.81757	0.437774
CG13004	145218_at	0.821062	0.438823
CG3797	154822_at	0.82859	0.441072
CG13532	147723_at	0.829068	0.441214
GRHR	152836_at	0.844287	0.445703
CG14830	148319_at	0.853797	0.448472
CHORD	150490_at	0.861219	0.450614
Pms2	141720_at	0.870057	0.453143
CG4462	152321_at	0.881519	0.456388
CG42345	146642_at	0.893866	0.459841
CG34309	151039_at	0.896024	0.46044
sun	151349_at	0.902551	0.462243
CG13471	148765_at	0.908766	0.46395
CG11802	154533_at	0.909805	0.464234
CG12640	144800_at	0.933602	0.470662
CG4562	150223_at	0.937076	0.471587
CG31202	150860_at	0.959569	0.477501
CG2681	151891_at	0.961871	0.478099
CG9095	145106_at	0.965294	0.478986
CG8916	145161_at	0.973566	0.481116
CG2003	150962_at	0.982086	0.483291
CG6805	153566_at	0.983356	0.483614
CG6854	154401_at	0.988679	0.484962
CG6405	151969_at	0.988986	0.48504
tacc	153843_at	0.996541	0.486941
