# Supplementary material for: Deep sequencing the circadian and diurnal transcriptome ofDrosophilabrain
Source: HighWire-hosted journal article supplement (doi:10.1101/gr.128876.111), 2012-04-03
Supplement: Table_S6.xlsx [file Table_S6.xlsx]

## Sheet: Sheet1
	Annotation	Count	p-value	Benjamini	Genes
Up-regulated in Per0	Drug Metabolism	7	0.00058	0.028	Adh, CG3797, Fmo-1, GstD1, GstE1, CG9362, se
	Glutathione Transferase Activity	5	0.0021	0.046	CG6673, GstD1, GstE1, CG9362, se
	Metabolism of xenobiotics by cytochrome P450	6	0.0035	0.82	Adh, CG3797, GstD1, GstE1, CG9362, se
	Nucleotide Binding	29	0.0096	0.61	Act57B, Adh, CG6854, Cng, CG10924, CG12640, CG13375, CG13471, CG3225, CG33797, CG42249, CG4562, ire-1, Pms2, CG8866, CG9517, Fmo-1, Gpdh, Madm, MRP, Pkc53E, sick, SuUR, Taf1, UbcD4, nonA-I, rl, tefu
Down-regulated in Per0	Phospholipid biosynthetitic process	7	0.00061	0.047	CdsA, fu12, CG5508, CG7149, Pis, norpA, rdgA
	Phototransduction	6	0.00045	0.069	CdsA, Gbeta76C, Pis, ninaD, norpA, rdgA
	Extrinsic to membrane	10	0.00066	0.082	Cyp6g1, Cyp6a2, CG17760, Fps85F, Gbeta76C, Cyp28d1, Cyp4ac3, norpA, rdgA
	Membrane Fraction	7	0.0064	0.35	Cyp6g1, Cyp6a2, GNBP1, Cyp28d1, Cyp4ac3, Cyp4p3, norpA
