# Supplementary material for: Deep sequencing the circadian and diurnal transcriptome ofDrosophilabrain
Source: HighWire-hosted journal article supplement (doi:10.1101/gr.128876.111), 2012-04-03
Supplement: Table_S7.xlsx [file Table_S7.xlsx]

## Sheet: Sheet1
transcript	JTK ADJP-value	JTK BHQ-value	JTK Period	JTK Lag	JTK Amplitude	FisherG p-value	FisherG q-value	Fisher'sG Period
CG15890.a(modencode)	0.000198413	0.153863	24	9	0.0479418	0.212545	0.891245	24
CG15890-RA(modencode)	0.000198413	0.153863	24	9	0.0478711	0.212462	0.891234	24
CG31646-RA(modencode)	0.000198413	0.153863	24	18	0.457145	0.0456344	0.800627	24
CG42393.a(modencode)	0.000198413	0.153863	24	21	0.577565	0.0361595	0.79492	24
CG5798-RA(modencode)	0.000198413	0.153863	24	15	2.41258	0.000356054	0.401651	24
mld.e(modencode)	0.000198413	0.153863	24	18	0.474115	0.0496596	0.805309	24
mld.f(modencode)	0.000198413	0.153863	24	18	0.478853	0.049669	0.805328	24
mld-RB(modencode)	0.000198413	0.153863	24	18	0.473832	0.0496718	0.805334	24
ps.a(modencode)	0.000198413	0.153863	24	18	35.5611	0.0509823	0.807947	24
ps.aa(modencode)	0.000198413	0.153863	24	18	35.8939	0.0710045	0.836966	24
ps.b(modencode)	0.000198413	0.153863	24	18	35.0346	0.0520633	0.810014	24
ps.c(modencode)	0.000198413	0.153863	24	18	34.9176	0.0517634	0.809448	24
ps.g(modencode)	0.000198413	0.153863	24	18	7.45163	0.0244666	0.782087	24
ps.k(modencode), ps-RH(modencode)	0.000198413	0.153863	24	18	38.0348	0.0561379	0.817174	24
ps.s(modencode)	0.000198413	0.153863	24	18	34.7951	0.0553835	0.815919	24
ps.u(modencode)	0.000198413	0.153863	24	18	26.2505	0.038622	0.796664	24
ps-RF(modencode)	0.000198413	0.153863	24	18	34.9231	0.0517297	0.809384	24
Baldspot.g(modencode)	0.0015873	0.300159	24	9	11.3621	0.0232815	0.780104	24
Baldspot.h(modencode)	0.0015873	0.300159	24	9	11.1073	0.0231345	0.779845	24
bwa.d(modencode)	0.0015873	0.300159	24	21	1.5195	0.156938	0.881089	24
bwa-RA(modencode)	0.0015873	0.300159	24	21	2.08681	0.0386673	0.796694	24
CG11486.m(modencode)	0.0015873	0.300159	24	18	1.96901	0.0171041	0.765633	24
CG11486.n(modencode)	0.0015873	0.300159	24	18	2.52465	0.00737905	0.701041	24
CG11486.o(modencode)	0.0015873	0.300159	24	18	2.14833	0.0179672	0.768213	24
CG11486.p(modencode)	0.0015873	0.300159	24	18	2.09226	0.0189356	0.770846	24
CG11486.q(modencode)	0.0015873	0.300159	24	18	2.19267	0.0177477	0.767579	24
CG11486-RC(modencode)	0.0015873	0.300159	24	18	1.86719	0.0182914	0.769124	24
CG11874.a(modencode)	0.0015873	0.300159	24	18	36.0156	0.0201719	0.773861	24
CG12975-RA(modencode)	0.0015873	0.300159	24	3	2.64953	0.0151345	0.75873	24
CG13937-RG(modencode)	0.0015873	0.300159	24	0	3.18926	0.0212542	0.77623	24
CG17167-RC(modencode)	0.0015873	0.300159	24	18	0.194454	0.110772	0.865378	24
CG17167-RD(modencode)	0.0015873	0.300159	24	18	0.194242	0.110733	0.86536	24
CG3107-RC(modencode)	0.0015873	0.300159	24	3	2.20561	0.168234	0.883673	24
CG3194-RA(modencode)	0.0015873	0.300159	24	18	0.605778	0.201418	0.889646	24
CG3194-RB(modencode)	0.0015873	0.300159	24	18	0.604435	0.201434	0.889649	24
CG42393.b(modencode)	0.0015873	0.300159	24	21	0.513501	0.0221408	0.778007	24
CG5798.a(modencode)	0.0015873	0.300159	24	15	4.35832	0.00182652	0.488644	24
CG5871.a(modencode)	0.0015873	0.300159	24	18	0.24473	0.0508759	0.807739	24
CG5871-RA(modencode)	0.0015873	0.300159	24	18	0.241831	0.0509066	0.807799	24
chif-RA(modencode)	0.0015873	0.300159	24	18	6.42993	0.0882903	0.852225	24
chif-RB(modencode)	0.0015873	0.300159	24	18	6.33193	0.0838449	0.848855	24
chr3L_7763493_7764700.0(modencode)	0.0015873	0.300159	24	3	1.03598	0.000549827	0.412881	24
Eip78C.h(modencode)	0.0015873	0.300159	24	18	0.905521	0.114506	0.867092	24
Fak56D.a(modencode)	0.0015873	0.300159	24	18	1.56759	0.0349225	0.793954	24
Fak56D-RA(modencode)	0.0015873	0.300159	24	18	1.646	0.0268172	0.785524	24
Fak56D-RB(modencode)	0.0015873	0.300159	24	18	1.76741	0.0274052	0.786296	24
Fak56D-RC(modencode)	0.0015873	0.300159	24	18	1.85757	0.0271101	0.785913	24
Fak56D-RD(modencode)	0.0015873	0.300159	24	18	1.57041	0.0349219	0.793954	24
Fak56D-RF(modencode)	0.0015873	0.300159	24	18	1.67577	0.026816	0.785523	24
Fak56D-RG(modencode)	0.0015873	0.300159	24	18	1.91513	0.0273924	0.78628	24
Gycbeta100B-RA(modencode)	0.0015873	0.300159	24	18	4.24695	0.0919489	0.854772	24
hbn-RA(modencode)	0.0015873	0.300159	24	18	0.206051	0.125353	0.871523	24
Mhcl-RG(modencode)	0.0015873	0.300159	24	18	1.25271	0.069274	0.835058	24
msps.a(modencode)	0.0015873	0.300159	24	18	12.3582	0.0463111	0.800948	24
msps.b(modencode)	0.0015873	0.300159	24	18	12.3582	0.0463111	0.800948	24
msps.c(modencode)	0.0015873	0.300159	24	18	12.4842	0.0463328	0.800958	24
msps.d(modencode)	0.0015873	0.300159	24	18	12.4863	0.0463171	0.800951	24
msps.e(modencode)	0.0015873	0.300159	24	18	12.0594	0.0464676	0.801021	24
msps.f(modencode)	0.0015873	0.300159	24	18	12.4262	0.047906	0.801669	24
msps.g(modencode)	0.0015873	0.300159	24	18	12.4444	0.0478586	0.801648	24
msps-RB(modencode)	0.0015873	0.300159	24	18	12.2445	0.0463217	0.800953	24
msps-RC(modencode)	0.0015873	0.300159	24	18	12.2805	0.0463001	0.800943	24
nc_22683.a(modencode)	0.0015873	0.300159	24	9	1.09729	0.00119077	0.43186	24
nc_7598.a(modencode)	0.0015873	0.300159	24	6	14.7297	0.00515715	0.658918	24
nc_7598.b(modencode)	0.0015873	0.300159	24	6	14.7852	0.00523267	0.660821	24
Uhg1-RA(modencode)	0.0015873	0.300159	24	6	14.6635	0.00569846	0.67165	24
ap-RB(modencode)	0.00694444	0.300159	24	18	1.44193	0.470991	0.927628	24
ap-RD(modencode)	0.00694444	0.300159	24	18	1.27138	0.495019	0.930898	24
aret.a(modencode)	0.00694444	0.300159	24	18	1.70674	0.0275943	0.786538	24
aret.k(modencode)	0.00694444	0.300159	24	18	0.9034	0.192241	0.888193	24
aret-RA(modencode)	0.00694444	0.300159	24	18	1.7059	0.0277977	0.786794	24
aret-RC(modencode)	0.00694444	0.300159	24	18	1.71565	0.0275948	0.786538	24
aret-RE(modencode)	0.00694444	0.300159	24	18	1.93012	0.0831811	0.848323	24
Baldspot.d(modencode)	0.00694444	0.300159	24	9	12.174	0.0353789	0.794318	24
Baldspot.e(modencode)	0.00694444	0.300159	24	9	12.1949	0.0358334	0.794672	24
Baldspot.f(modencode)	0.00694444	0.300159	24	9	12.0691	0.0353753	0.794315	24
c(3)G-RA_c(3)G-RA(modencode)	0.00694444	0.300159	24	21	0.319047	0.0427656	0.799158	24
c(3)G-RB_c(3)G-RB(modencode)	0.00694444	0.300159	24	21	0.322441	0.0426054	0.799071	24
c(3)G-RC_c(3)G-RC(modencode)	0.00694444	0.300159	24	21	0.320249	0.0427963	0.799175	24
C1GalTA-RA(modencode)	0.00694444	0.300159	24	18	1.33806	0.1103	0.865154	24
capu.c(modencode)	0.00694444	0.300159	24	18	0.770393	0.0853857	0.85006	24
capu-RJ(modencode), capu.g(modencode)	0.00694444	0.300159	24	18	0.652589	0.108987	0.86452	24
CG10069.a(modencode)	0.00694444	0.300159	24	21	0.749745	0.0238187	0.781026	24
CG10186.a(modencode)	0.00694444	0.300159	24	18	2.86095	0.0679175	0.833501	24
CG10186-RC(modencode)	0.00694444	0.300159	24	18	2.9089	0.0702253	0.836117	24
CG10188.a(modencode)	0.00694444	0.300159	24	18	1.43295	0.109392	0.864717	24
CG10188.b(modencode)	0.00694444	0.300159	24	18	1.43408	0.109408	0.864725	24
CG10188-RA(modencode)	0.00694444	0.300159	24	18	1.44476	0.11171	0.865819	24
CG10188-RB(modencode)	0.00694444	0.300159	24	18	1.43988	0.109405	0.864724	24
CG10553-RA(modencode)	0.00694444	0.300159	24	21	7.37498	0.00398046	0.622214	24
CG11137-RA(modencode)	0.00694444	0.300159	24	6	0.809708	0.0898945	0.853366	24
CG11155.a(modencode)	0.00694444	0.300159	24	6	24.1902	0.266215	0.897129	24
CG11155.b(modencode)	0.00694444	0.300159	24	6	23.4758	0.266224	0.89713	24
CG11155.d(modencode)	0.00694444	0.300159	24	6	19.483	0.286782	0.898815	24
CG11155.e(modencode)	0.00694444	0.300159	24	6	18.6498	0.28695	0.898828	24
CG11155.f(modencode)	0.00694444	0.300159	24	6	15.6239	0.290808	0.899117	24
CG11155-RA(modencode)	0.00694444	0.300159	24	6	22.481	0.270044	0.897462	24
CG11486.al(modencode)	0.00694444	0.300159	24	18	0.214819	0.0494481	0.804876	12
CG11486.u(modencode)	0.00694444	0.300159	24	18	0.195303	0.0486811	0.803278	12
CG11486-RA(modencode)	0.00694444	0.300159	24	18	0.239638	0.0481893	0.80223	12
CG11486-RB(modencode)	0.00694444	0.300159	24	18	1.62232	0.013455	0.751387	24
CG11486-RD(modencode)	0.00694444	0.300159	24	18	1.19162	0.031864	0.791258	24
CG11505.f(modencode)	0.00694444	0.300159	24	15	2.53222	0.126615	0.871992	24
CG11873.e(modencode)	0.00694444	0.300159	24	18	18.9443	0.0361518	0.794914	24
CG11873.f(modencode)	0.00694444	0.300159	24	18	18.788	0.0363339	0.795051	24
CG11873.j(modencode)	0.00694444	0.300159	24	18	19.057	0.0363033	0.795028	24
CG11873.k(modencode)	0.00694444	0.300159	24	18	19.2176	0.0361209	0.794891	24
CG12125.a(modencode)	0.00694444	0.300159	24	21	0.265024	0.50408	0.932056	24
CG12125.b(modencode)	0.00694444	0.300159	24	21	0.268135	0.507968	0.932541	24
CG12125-RA(modencode)	0.00694444	0.300159	24	21	0.243245	0.502468	0.931853	24
CG1295.a(modencode)	0.00694444	0.300159	24	18	0.638659	0.108392	0.864228	24
CG13003.b(modencode)	0.00694444	0.300159	24	0	0.500066	0.0155558	0.760343	24
CG1308.a(modencode)	0.00694444	0.300159	24	18	0.622113	0.138405	0.875979	24
CG1308.b(modencode)	0.00694444	0.300159	24	18	0.62282	0.138431	0.875987	24
CG1308-RA(modencode)	0.00694444	0.300159	24	18	0.595808	0.144929	0.87792	24
CG1332-RA(modencode)	0.00694444	0.300159	24	18	2.79286	0.0490678	0.804089	24
CG13636-MIP22154(modencode)	0.00694444	0.300159	24	18	2.91328	0.186145	0.887152	24
CG13937-RE(modencode)	0.00694444	0.300159	24	0	3.66295	0.0220175	0.777768	24
CG15099-RA(modencode)	0.00694444	0.300159	24	18	0.524603	0.202954	0.889877	24
CG15465.a(modencode)	0.00694444	0.300159	24	18	14.1482	0.159406	0.881683	24
CG15609.a(modencode)	0.00694444	0.300159	24	18	8.04412	0.0262305	0.784721	24
CG15609.b(modencode)	0.00694444	0.300159	24	18	7.1311	0.0256091	0.783833	24
CG15609.c(modencode)	0.00694444	0.300159	24	18	7.44166	0.0736296	0.839704	24
CG15609.d(modencode)	0.00694444	0.300159	24	18	6.8945	0.0279119	0.786936	24
CG15609.f(modencode)	0.00694444	0.300159	24	18	6.69319	0.0276128	0.786561	24
CG15609.h(modencode)	0.00694444	0.300159	24	18	6.87562	0.0794163	0.845153	24
CG15609.i(modencode)	0.00694444	0.300159	24	18	7.81226	0.0265963	0.785226	24
CG15609.j(modencode)	0.00694444	0.300159	24	18	6.62446	0.0798815	0.845559	24
CG15609-RB(modencode)	0.00694444	0.300159	24	18	8.38211	0.0243746	0.781939	24
CG15609-RE(modencode)	0.00694444	0.300159	24	18	7.14765	0.0744494	0.840523	24
CG15609-RF(modencode)	0.00694444	0.300159	24	18	7.38128	0.0257174	0.78399	24
CG15609-RG(modencode)	0.00694444	0.300159	24	18	7.87088	0.0259416	0.784313	24
CG15760-RA(modencode)	0.00694444	0.300159	24	21	1.32837	0.100565	0.860087	24
CG1622-RA(modencode)	0.00694444	0.300159	24	18	0.315087	0.0978883	0.858529	24
CG17691.c(modencode)	0.00694444	0.300159	24	0	0.8189	0.0594846	0.8224	24
CG2614-RA(modencode)	0.00694444	0.300159	24	18	0.822931	0.0717513	0.837763	24
CG30389.a(modencode)	0.00694444	0.300159	24	18	3.64011	0.307258	0.900274	24
CG3107.a(modencode)	0.00694444	0.300159	24	3	2.30658	0.156506	0.880982	24
CG3107.b(modencode)	0.00694444	0.300159	24	3	2.47982	0.116357	0.867904	24
CG3107-RA(modencode)	0.00694444	0.300159	24	3	2.3722	0.156391	0.880954	24
CG3107-RB(modencode)	0.00694444	0.300159	24	3	2.44213	0.152291	0.879919	24
CG31145-RA(modencode)	0.00694444	0.300159	24	18	0.741189	0.0216263	0.776992	24
CG31304-RA(modencode)	0.00694444	0.300159	24	18	0.760493	0.212444	0.891231	24
CG31522.a(modencode)	0.00694444	0.300159	24	15	3.51849	0.0108476	0.735958	24
CG31522.b(modencode), CG31522-RB(modencode)	0.00694444	0.300159	24	15	3.02104	0.00957883	0.725772	24
CG31522.c(modencode)	0.00694444	0.300159	24	15	2.5436	0.00992987	0.728821	24
CG31522.d(modencode)	0.00694444	0.300159	24	15	2.90062	0.00950195	0.725077	24
CG31522-RA(modencode)	0.00694444	0.300159	24	15	3.14394	0.0111032	0.737758	24
CG31522-RD(modencode)	0.00694444	0.300159	24	15	3.38725	0.00680283	0.692339	24
CG31550-RA(modencode)	0.00694444	0.300159	24	18	3.5624	0.22875	0.893304	24
CG32103-RC(modencode)	0.00694444	0.300159	24	0	3.97762	0.112634	0.866247	24
CG33521.a(modencode)	0.00694444	0.300159	24	3	5.09357	0.129312	0.872965	24
CG33521.f(modencode)	0.00694444	0.300159	24	3	4.58573	0.1292	0.872925	24
CG33521.h(modencode)	0.00694444	0.300159	24	3	4.65665	0.129199	0.872925	24
CG33558-RD(modencode)	0.00694444	0.300159	24	18	1.23821	0.0975514	0.858328	24
CG3358.b(modencode)	0.00694444	0.300159	24	21	1.18737	0.0883644	0.852279	24
CG34134-RA(modencode)	0.00694444	0.300159	24	0	13.3169	0.0135579	0.751885	24
CG3419-RB(modencode)	0.00694444	0.300159	24	18	0.337926	0.120324	0.869562	24
CG3764.a(modencode)	0.00694444	0.300159	24	18	1.14905	0.219261	0.892134	24
CG3764-RA(modencode)	0.00694444	0.300159	24	18	1.14855	0.218273	0.892007	24
CG3907.a(modencode)	0.00694444	0.300159	24	18	11.6385	0.422946	0.920064	24
CG3907-RA(modencode)	0.00694444	0.300159	24	18	10.4649	0.422941	0.920063	24
CG3907-RB(modencode)	0.00694444	0.300159	24	18	11.7276	0.422947	0.920064	24
CG40191-MIP17132(modencode)	0.00694444	0.300159	24	6	2.87891	0.0799288	0.8456	24
CG42257-IP10959(modencode)	0.00694444	0.300159	24	18	0.0748826	0.0521006	0.810085	24
CG42594-RA(modencode)	0.00694444	0.300159	24	18	0.377524	0.209108	0.890769	24
CG4641.a(modencode)	0.00694444	0.300159	24	18	135.358	0.0882525	0.852198	24
CG4641-RA(modencode)	0.00694444	0.300159	24	18	130.505	0.0883008	0.852233	24
CG4644-RA(modencode)	0.00694444	0.300159	24	18	0.65669	0.0157024	0.760885	24
CG4679-RA(modencode)	0.00694444	0.300159	24	18	0.308723	0.0730256	0.83909	24
CG4911.c(modencode)	0.00694444	0.300159	24	18	22.7576	0.0112123	0.738503	24
CG4911.d(modencode)	0.00694444	0.300159	24	18	23.3559	0.0112102	0.738489	24
CG5126-RA(modencode)	0.00694444	0.300159	24	18	0.308652	0.538476	0.936119	24
CG5741-RD(modencode)	0.00694444	0.300159	24	18	0.587181	0.213364	0.891357	24
CG5741-RE(modencode)	0.00694444	0.300159	24	18	0.571413	0.220086	0.89224	24
CG6356.a(modencode)	0.00694444	0.300159	24	9	4.60949	0.438945	0.922752	24
CG6356.b(modencode)	0.00694444	0.300159	24	9	4.28691	0.439669	0.92287	24
CG6951.a(modencode)	0.00694444	0.300159	24	6	0.358927	0.0518961	0.8097	24
CG7646-RB(modencode)	0.00694444	0.300159	24	6	11.5023	0.15066	0.879492	24
CG8027-RA(modencode)	0.00694444	0.300159	24	18	0.208667	0.0985765	0.858937	24
CG8078.a(modencode)	0.00694444	0.300159	24	6	0.752644	0.0127622	0.747846	24
CG8379-RA(modencode)	0.00694444	0.300159	24	18	0.292177	0.238386	0.894399	24
CG8379-RB(modencode)	0.00694444	0.300159	24	18	0.291894	0.238376	0.894398	24
CG8486.o(modencode)	0.00694444	0.300159	24	21	0.326047	0.196624	0.888904	24
CG8486.q(modencode)	0.00694444	0.300159	24	21	0.335027	0.198674	0.889225	24
CG8486-RF(modencode)	0.00694444	0.300159	24	21	0.320673	0.196939	0.888953	24
CG8520-RA(modencode)	0.00694444	0.300159	24	0	0.504096	0.00288283	0.569295	24
CG8679-RA(modencode)	0.00694444	0.300159	24	18	0.196081	0.0550003	0.81527	24
CG9003.d(modencode)	0.00694444	0.300159	24	18	1.22428	0.306493	0.900223	24
CG9776.c(modencode)	0.00694444	0.300159	24	18	1.19232	0.411254	0.917978	12
cln3.a(modencode)	0.00694444	0.300159	24	12	0.333118	0.0274896	0.786404	24
cln3-RA(modencode)	0.00694444	0.300159	24	12	0.336229	0.027383	0.786267	24
dpr4-RC(modencode)	0.00694444	0.300159	24	18	2.64394	0.387136	0.913311	24
dpr7.a(modencode)	0.00694444	0.300159	24	6	18.6765	0.096606	0.857755	24
dpr7-RB(modencode)	0.00694444	0.300159	24	6	27.2294	0.100763	0.860199	24
Dyb.c(modencode)	0.00694444	0.300159	24	18	0.674368	0.0904776	0.853771	24
Dyb.h(modencode)	0.00694444	0.300159	24	21	1.93514	0.0459457	0.800776	24
Dyb.i(modencode)	0.00694444	0.300159	24	21	1.63936	0.0416794	0.798551	24
E(bx)-RC_E(bx)-RC(modencode)	0.00694444	0.300159	24	18	7.66334	0.0890989	0.852805	24
E(bx)-RF_E(bx)-RF(modencode)	0.00694444	0.300159	24	18	7.72132	0.0890994	0.852805	24
Eps-15-RC(modencode)	0.00694444	0.300159	24	18	0.918178	0.17286	0.884638	24
faf.a(modencode)	0.00694444	0.300159	24	18	2.63984	0.127469	0.872304	24
faf.b(modencode)	0.00694444	0.300159	24	18	2.69804	0.127697	0.872387	24
faf.c(modencode)	0.00694444	0.300159	24	18	2.7329	0.127828	0.872434	24
faf.d(modencode)	0.00694444	0.300159	24	18	2.86711	0.12783	0.872435	24
faf.e(modencode)	0.00694444	0.300159	24	18	2.7621	0.128072	0.872522	24
faf.f(modencode)	0.00694444	0.300159	24	18	2.04417	0.129713	0.873106	24
faf.g(modencode)	0.00694444	0.300159	24	18	2.05019	0.130019	0.873213	24
faf-RA(modencode)	0.00694444	0.300159	24	18	2.69556	0.127551	0.872334	24
fal.a(modencode)	0.00694444	0.300159	24	18	0.372645	0.023209	0.779977	24
fal.b(modencode)	0.00694444	0.300159	24	18	0.363311	0.025953	0.784329	24
fal-RA(modencode), fal-RB(modencode)	0.00694444	0.300159	24	18	0.367978	0.0259457	0.784319	24
ftz-f1.b(modencode)	0.00694444	0.300159	24	18	4.75558	0.259188	0.896494	24
GlcAT-S.a(modencode)	0.00694444	0.300159	24	18	3.97444	0.0159057	0.761622	24
GlcAT-S-RA(modencode)	0.00694444	0.300159	24	18	5.52774	0.0185335	0.769784	24
GlcAT-S-RB(modencode)	0.00694444	0.300159	24	18	4.12356	0.0154963	0.76012	24
gol.b(modencode)	0.00694444	0.300159	24	15	8.37172	0.0620062	0.826003	24
gol-RC(modencode)	0.00694444	0.300159	24	15	9.3191	0.0669898	0.832403	24
gry-RA(modencode)	0.00694444	0.300159	24	18	0.506783	0.132721	0.874141	24
gry-RB(modencode)	0.00694444	0.300159	24	18	0.512582	0.130511	0.873385	24
Gyc88E.e(modencode)	0.00694444	0.300159	24	18	0.102106	0.238798	0.894444	24
Gyc88E-RD(modencode)	0.00694444	0.300159	24	18	0.127916	0.135811	0.875158	24
Gycbeta100B.a(modencode)	0.00694444	0.300159	24	18	3.77729	0.105985	0.863016	24
hkl.a(modencode)	0.00694444	0.300159	24	18	9.5808	0.189282	0.887696	24
hkl-RB(modencode)	0.00694444	0.300159	24	18	8.53181	0.191575	0.888083	24
jing-RB(modencode)	0.00694444	0.300159	24	3	1.08845	0.093759	0.855964	24
lola-RG(modencode)	0.00694444	0.300159	24	18	1.99008	0.304019	0.900056	12
Max-RA(modencode)	0.00694444	0.300159	24	18	1.31593	0.179267	0.885895	24
Mgat2-MIP20596(modencode)	0.00694444	0.300159	24	18	1.1646	0.35952	0.907269	24
Mhcl-RC(modencode)	0.00694444	0.300159	24	18	2.69896	0.0642663	0.829016	24
mus210-RB(modencode)	0.00694444	0.300159	24	18	0.563352	0.0294553	0.788756	24
Myo95E-RB(modencode)	0.00694444	0.300159	24	18	1.34916	0.202452	0.889802	24
Myo95E-RD(modencode)	0.00694444	0.300159	24	18	1.33417	0.202435	0.889799	24
Myo95E-RG(modencode), Myo95E-RH(modencode)	0.00694444	0.300159	24	18	1.29853	0.205752	0.890289	24
nAcRalpha-96Ab.a(modencode)	0.00694444	0.300159	24	18	1.52247	0.0694742	0.835283	24
nAcRalpha-96Ab-RA(modencode)	0.00694444	0.300159	24	18	1.41831	0.0686329	0.834329	24
nAcRalpha-96Ab-RB(modencode)	0.00694444	0.300159	24	18	1.45919	0.0686276	0.834323	24
nc_16091.a(modencode)	0.00694444	0.300159	24	3	1.28495	0.0963622	0.857605	24
nc_5362.b(modencode)	0.00694444	0.300159	24	6	2.93322	0.0292611	0.788537	24
Ndae1.n(modencode)	0.00694444	0.300159	24	21	1.85142	0.107987	0.864028	24
Nf1-IP16186(modencode)	0.00694444	0.300159	24	18	0.630244	0.290639	0.899105	24
Nhe2.u(modencode)	0.00694444	0.300159	24	18	7.17423	0.150812	0.879532	24
Nos-RA(modencode)	0.00694444	0.300159	24	18	0.232214	0.210204	0.890922	24
Nos-RE(modencode)	0.00694444	0.300159	24	18	0.30646	0.1917	0.888103	24
Nos-RF(modencode)	0.00694444	0.300159	24	18	0.226911	0.210204	0.890922	24
Nos-RH(modencode)	0.00694444	0.300159	24	18	0.172534	0.211207	0.891061	24
Nos-RI(modencode)	0.00694444	0.300159	24	18	0.212981	0.21021	0.890923	24
Nrx-1.a(modencode)	0.00694444	0.300159	24	18	2.09049	0.400226	0.915908	24
Nrx-1.b(modencode)	0.00694444	0.300159	24	18	1.88112	0.39512	0.914913	24
Nrx-1-RA(modencode)	0.00694444	0.300159	24	18	1.88748	0.395679	0.915023	24
Nrx-1-RB(modencode)	0.00694444	0.300159	24	18	1.86655	0.395951	0.915077	24
Pak.f(modencode)	0.00694444	0.300159	24	15	0.769474	0.772656	0.954601	12
Pak.g(modencode)	0.00694444	0.300159	24	15	0.783262	0.738806	0.95262	12
Pak.h(modencode)	0.00694444	0.300159	24	15	0.813385	0.730585	0.952112	12
Pak.j(modencode)	0.00694444	0.300159	24	15	0.956433	0.738912	0.952626	12
Pp1alpha-96A.a(modencode)	0.00694444	0.300159	24	21	22.1767	0.0764672	0.84247	24
ps.ap(modencode)	0.00694444	0.300159	24	18	35.3095	0.0936344	0.855883	24
ps.bc(modencode)	0.00694444	0.300159	24	18	47.7551	0.0615417	0.825359	24
ps.bd(modencode)	0.00694444	0.300159	24	18	44.4638	0.04957	0.805126	24
pum.m(modencode)	0.00694444	0.300159	24	18	9.9089	0.053183	0.812078	24
pum.q(modencode)	0.00694444	0.300159	24	18	9.72413	0.0513636	0.808685	24
pum-RA(modencode)	0.00694444	0.300159	24	18	8.85156	0.131805	0.87383	24
pum-RC(modencode)	0.00694444	0.300159	24	18	8.72096	0.128861	0.872805	24
pum-RD(modencode)	0.00694444	0.300159	24	18	8.85411	0.131807	0.873831	24
Pxn-LD40695(modencode)	0.00694444	0.300159	24	18	0.139654	0.0627957	0.827078	24
rdx.f(modencode)	0.00694444	0.300159	24	18	2.81322	0.420829	0.919694	24
rdx.g(modencode)	0.00694444	0.300159	24	18	2.85212	0.412735	0.918248	24
rdx.h(modencode)	0.00694444	0.300159	24	18	2.65971	0.426713	0.920714	24
rdx.i(modencode)	0.00694444	0.300159	24	18	2.52296	0.385112	0.912895	24
rogdi-RA(modencode)	0.00694444	0.300159	24	18	2.74478	0.287441	0.898865	24
rogdi-RB(modencode)	0.00694444	0.300159	24	18	2.35403	0.293883	0.899343	24
Sap30.a(modencode)	0.00694444	0.300159	24	18	0.800021	0.264734	0.896998	24
Sap30-RA(modencode)	0.00694444	0.300159	24	18	0.852417	0.231727	0.893652	24
Scp2-RA(modencode)	0.00694444	0.300159	24	3	37.0931	0.0129044	0.748601	24
Sec16.a(modencode)	0.00694444	0.300159	24	15	0.656902	0.160525	0.881947	24
Sec16.d(modencode)	0.00694444	0.300159	24	15	0.657256	0.160512	0.881944	24
Sep4-RD(modencode)	0.00694444	0.300159	24	18	13.3064	0.110547	0.865272	24
Sep4-RE(modencode)	0.00694444	0.300159	24	18	13.239	0.110548	0.865272	24
Slob.a(modencode)	0.00694444	0.300159	24	15	11.0292	0.0681036	0.833718	24
Slob-RA(modencode)	0.00694444	0.300159	24	15	11.5198	0.0790799	0.844856	24
Slob-RC(modencode)	0.00694444	0.300159	24	15	9.52558	0.04567	0.800644	24
Slob-RD(modencode)	0.00694444	0.300159	24	15	11.3613	0.0759613	0.841991	24
SP2353.b(modencode)	0.00694444	0.300159	24	18	14.4904	0.0741759	0.840251	24
SP2353.c(modencode)	0.00694444	0.300159	24	18	13.1453	0.049524	0.805032	24
SP2353.d(modencode)	0.00694444	0.300159	24	18	14.7161	0.0634963	0.828011	24
SP2353.e(modencode)	0.00694444	0.300159	24	18	13.2529	0.0421958	0.798844	24
SP2353.f(modencode)	0.00694444	0.300159	24	18	11.514	0.0361881	0.794941	24
SP71-RA(modencode)	0.00694444	0.300159	24	18	0.0890955	0.147418	0.878617	24
spel1-RA(modencode)	0.00694444	0.300159	24	18	0.0479418	0.0642026	0.828934	24
spel1-RC(modencode)	0.00694444	0.300159	24	18	0.0468105	0.0642586	0.829006	24
sws-RB(modencode)	0.00694444	0.300159	24	18	6.42124	0.184282	0.88682	24
Uhg4-RA(modencode)	0.00694444	0.300159	24	6	2.95839	0.0292641	0.788541	24
vri.a(modencode)	0.00694444	0.300159	24	12	7.73759	0.000493866	0.410491	24
Zyx102EF.a(modencode)	0.00694444	0.300159	24	6	10.4219	0.041878	0.798664	24
Zyx102EF.b(modencode)	0.00694444	0.300159	24	6	9.69924	0.0415862	0.798498	24
Zyx102EF.c(modencode)	0.00694444	0.300159	24	6	10.8799	0.0422226	0.798859	24
Zyx102EF.d(modencode)	0.00694444	0.300159	24	6	11.2142	0.0420918	0.798785	24
Zyx102EF.e(modencode)	0.00694444	0.300159	24	6	10.2536	0.0418165	0.798629	24
Zyx102EF.f(modencode)	0.00694444	0.300159	24	6	10.3569	0.0418165	0.798629	24
Zyx102EF-RA(modencode)	0.00694444	0.300159	24	6	10.1029	0.0414537	0.798421	24
Zyx102EF-RB(modencode)	0.00694444	0.300159	24	6	10.4471	0.0418262	0.798635	24
Zyx102EF-RC(modencode)	0.00694444	0.300159	24	6	10.4725	0.0418256	0.798635	24
Zyx102EF-RD(modencode)	0.00694444	0.300159	24	6	10.7704	0.0416941	0.79856	24
Zyx102EF-RE(modencode)	0.00694444	0.300159	24	6	10.4522	0.0418264	0.798635	24
Zyx102EF-RF(modencode)	0.00694444	0.300159	24	6	10.9064	0.0416938	0.798559	24
abs-RA(modencode)	0.0220238	0.334493	24	18	0.3293	0.573709	0.939806	16
Adar.c(modencode)	0.0220238	0.334493	24	18	1.40021	0.218851	0.892082	24
Amph.g(modencode)	0.0220238	0.334493	24	0	28.7929	0.049849	0.805694	24
aret.b(modencode)	0.0220238	0.334493	24	18	1.30468	0.172235	0.88451	24
Arp14D.a(modencode)	0.0220238	0.334493	24	18	9.47898	0.0855543	0.850189	24
Arp14D.b(modencode)	0.0220238	0.334493	24	18	9.31175	0.0845093	0.849379	24
Arp14D.c(modencode)	0.0220238	0.334493	24	18	9.30482	0.0845091	0.849379	24
Arp14D.d(modencode)	0.0220238	0.334493	24	18	9.31868	0.0845081	0.849378	24
Arp14D.e(modencode)	0.0220238	0.334493	24	18	9.03513	0.0842002	0.849136	24
Arp14D.f(modencode)	0.0220238	0.334493	24	18	8.44052	0.085238	0.849946	24
Arp14D.g(modencode)	0.0220238	0.334493	24	18	8.46888	0.0852414	0.849948	24
Arp14D-RB(modencode)	0.0220238	0.334493	24	18	8.93514	0.0857528	0.850341	24
beat-Ia.a(modencode)	0.0220238	0.334493	24	18	12.9788	0.165694	0.883121	24
beat-Ia-RA(modencode)	0.0220238	0.334493	24	18	13.1091	0.165879	0.883162	24
Bili.a(modencode)	0.0220238	0.334493	24	18	0.709652	0.318654	0.901006	24
Bili-RB(modencode)	0.0220238	0.334493	24	18	1.37256	0.28845	0.898941	24
Bili-RC(modencode)	0.0220238	0.334493	24	18	1.55026	0.285257	0.898698	24
Bili-RE(modencode)	0.0220238	0.334493	24	18	1.37561	0.290625	0.899104	24
Bili-RF(modencode)	0.0220238	0.334493	24	18	1.54206	0.285252	0.898698	24
Bili-RG(modencode), Bili.b(modencode)	0.0220238	0.334493	24	18	1.50805	0.232122	0.893697	24
Blimp-1.a(modencode)	0.0220238	0.334493	24	18	0.486419	0.6125	0.943402	16
bun-RC(modencode)	0.0220238	0.334493	24	18	41.9513	0.0819391	0.847307	24
cact.c(modencode)	0.0220238	0.334493	24	18	0.600051	0.345879	0.903963	24
CaMKII.ae(modencode)	0.0220238	0.334493	24	3	27.8445	0.174287	0.884925	24
CaMKII.h(modencode)	0.0220238	0.334493	24	3	21.32	0.194364	0.888541	24
CaMKII.w(modencode)	0.0220238	0.334493	24	3	25.6436	0.176661	0.885394	24
CaMKII-RH(modencode)	0.0220238	0.334493	24	3	32.0027	0.175112	0.88509	24
capa-RA(modencode)	0.0220238	0.334493	24	3	2.12549	0.183859	0.886744	24
Ccn-RB(modencode)	0.0220238	0.334493	24	18	5.92456	0.296754	0.89955	24
CG10069-RA(modencode)	0.0220238	0.334493	24	21	0.657892	0.0224995	0.778688	24
CG10513-RB(modencode)	0.0220238	0.334493	24	3	2.13348	0.032486	0.791846	24
CG11105.a(modencode)	0.0220238	0.334493	24	18	1.6424	0.291277	0.899152	24
CG11105-RA(modencode)	0.0220238	0.334493	24	18	2.06701	0.278912	0.898199	24
CG11155.c(modencode)	0.0220238	0.334493	24	6	12.6272	0.536111	0.935855	24
CG11155-RC(modencode)	0.0220238	0.334493	24	6	19.989	0.389333	0.913758	24
CG11221-RA(modencode)	0.0220238	0.334493	24	12	0.592202	0.0745826	0.840654	24
CG11462-RA(modencode)	0.0220238	0.334493	24	18	49.9778	0.32208	0.901216	24
CG11486.a(modencode)	0.0220238	0.334493	24	18	0.814092	0.0355555	0.794457	24
CG11486.aq(modencode)	0.0220238	0.334493	24	18	1.94362	0.0228016	0.779246	24
CG11486.at(modencode)	0.0220238	0.334493	24	18	2.3949	0.0120098	0.743583	24
CG11486.b(modencode)	0.0220238	0.334493	24	18	0.825123	0.0352258	0.794197	24
CG11486.ba(modencode)	0.0220238	0.334493	24	18	0.815153	0.0282579	0.787361	24
CG11486.c(modencode)	0.0220238	0.334493	24	18	0.83877	0.0351787	0.79416	24
CG11486.d(modencode)	0.0220238	0.334493	24	18	0.827527	0.0355067	0.794418	24
CG11486.f(modencode)	0.0220238	0.334493	24	18	0.841386	0.0353949	0.794331	24
CG11486.g(modencode)	0.0220238	0.334493	24	18	0.70548	0.0370798	0.795598	12
CG11486.j(modencode)	0.0220238	0.334493	24	18	0.937411	0.0345533	0.793653	12
CG11486.k(modencode)	0.0220238	0.334493	24	18	0.935856	0.0345453	0.793647	12
CG11486.l(modencode)	0.0220238	0.334493	24	18	0.932957	0.0345458	0.793647	12
CG11486-RG(modencode)	0.0220238	0.334493	24	18	0.90545	0.0343985	0.793525	12
CG11486-RO(modencode)	0.0220238	0.334493	24	18	0.983161	0.0314765	0.79088	12
CG11539-RA(modencode)	0.0220238	0.334493	24	18	0.27358	0.106836	0.86345	24
CG12099-RA(modencode)	0.0220238	0.334493	24	19.5	2.38627	0.12462	0.871247	24
CG12099-RB(modencode)	0.0220238	0.334493	24	19.5	2.34349	0.140633	0.876661	24
CG12214-RA(modencode)	0.0220238	0.334493	24	18	6.22855	0.0986953	0.859007	24
CG12214-RB(modencode)	0.0220238	0.334493	24	18	5.49839	0.0978982	0.858535	24
CG12370.b(modencode)	0.0220238	0.334493	24	21	0.879217	0.0803618	0.845974	24
CG12455.a(modencode)	0.0220238	0.334493	24	18	0.270256	0.341058	0.902738	24
CG12455-RB(modencode)	0.0220238	0.334493	24	18	0.451346	0.309214	0.900403	24
CG13562-IP10460(modencode)	0.0220238	0.334493	24	3	9.97176	0.04393	0.799777	24
CG13594-RA(modencode)	0.0220238	0.334493	24	21	3.02458	0.125647	0.871633	24
CG13631-RA(modencode)	0.0220238	0.334493	24	18	95.1705	0.0353918	0.794328	24
CG13685-RA(modencode)	0.0220238	0.334493	24	18	0.859418	0.0860709	0.850583	24
CG13773-RA(modencode)	0.0220238	0.334493	24	3	0.0743169	0.24809	0.895419	12
CG13893.a(modencode)	0.0220238	0.334493	24	18	0.0591848	0.444909	0.923709	12
CG13895.a(modencode)	0.0220238	0.334493	24	18	0.159523	0.310462	0.900485	24
CG13895-RA(modencode)	0.0220238	0.334493	24	18	0.183777	0.31958	0.901063	24
CG14135.a(modencode)	0.0220238	0.334493	24	3	0.81982	0.153075	0.880121	24
CG14135-IP06574(modencode)	0.0220238	0.334493	24	3	0.826113	0.157969	0.881339	24
CG14135-RB(modencode)	0.0220238	0.334493	24	3	0.739917	0.158006	0.881348	24
CG14593-RB(modencode)	0.0220238	0.334493	24	18	0.111723	0.322946	0.901269	24
CG15029.b(modencode)	0.0220238	0.334493	24	18	11.9519	0.117481	0.868384	24
CG15609-RH(modencode)	0.0220238	0.334493	24	18	4.66507	0.0441366	0.799884	24
CG15735.a(modencode)	0.0220238	0.334493	24	18	9.49058	0.147315	0.878589	24
CG15735-RA(modencode)	0.0220238	0.334493	24	18	6.23718	0.143953	0.87764	24
CG15765-RA(modencode)	0.0220238	0.334493	24	18	41.9527	0.234783	0.894	24
CG1677-LD45662(modencode)	0.0220238	0.334493	24	18	4.23939	0.0734289	0.839501	24
CG1677-RA(modencode)	0.0220238	0.334493	24	18	4.482	0.0714051	0.837395	24
CG17370.d(modencode)	0.0220238	0.334493	24	18	1.62408	0.04161	0.798511	24
CG17370.e(modencode)	0.0220238	0.334493	24	18	1.48507	0.0426421	0.799091	24
CG17370.f(modencode)	0.0220238	0.334493	24	18	1.45275	0.0426327	0.799086	24
CG17370.g(modencode)	0.0220238	0.334493	24	18	1.65668	0.0416107	0.798512	24
CG17370-RA(modencode)	0.0220238	0.334493	24	18	1.72407	0.100069	0.859805	24
CG17370-RC(modencode)	0.0220238	0.334493	24	18	1.55578	0.0894056	0.853022	24
CG17370-RE(modencode)	0.0220238	0.334493	24	18	1.72407	0.100069	0.859805	24
CG17544.b(modencode)	0.0220238	0.334493	24	18	0.259791	0.166951	0.883396	24
CG17683.a(modencode)	0.0220238	0.334493	24	3	3.50711	0.0422507	0.798874	24
CG17683.b(modencode)	0.0220238	0.334493	24	3	3.92416	0.0474436	0.801465	24
CG17683.c(modencode)	0.0220238	0.334493	24	3	3.73105	0.047441	0.801464	24
CG17683.d(modencode)	0.0220238	0.334493	24	3	4.05809	0.0467406	0.801147	24
CG17683.e(modencode)	0.0220238	0.334493	24	3	2.75397	0.0456069	0.800614	24
CG17683.f(modencode)	0.0220238	0.334493	24	3	2.76627	0.045608	0.800615	24
CG17683.g(modencode)	0.0220238	0.334493	24	3	2.8478	0.0458659	0.800738	24
CG17683-RA(modencode)	0.0220238	0.334493	24	3	3.30141	0.0418806	0.798666	24
CG17683-RB(modencode)	0.0220238	0.334493	24	3	3.44566	0.0433573	0.799477	24
CG17683-RC(modencode)	0.0220238	0.334493	24	3	3.72101	0.047445	0.801465	24
CG17683-RD(modencode)	0.0220238	0.334493	24	3	3.3193	0.0418846	0.798668	24
CG17683-RE(modencode)	0.0220238	0.334493	24	3	3.32255	0.0418813	0.798666	24
CG17883.a(modencode)	0.0220238	0.334493	24	6	10.577	0.147305	0.878586	24
CG17883.b(modencode)	0.0220238	0.334493	24	6	8.01442	0.14701	0.878504	24
CG17883-RA(modencode)	0.0220238	0.334493	24	6	10.5407	0.147304	0.878586	24
CG17883-RB(modencode)	0.0220238	0.334493	24	6	10.9618	0.147305	0.878586	24
CG18177-RA(modencode)	0.0220238	0.334493	24	18	1.16517	0.0867365	0.851083	24
CG18177-RB(modencode)	0.0220238	0.334493	24	18	1.19826	0.0867345	0.851082	24
CG1969.e(modencode)	0.0220238	0.334493	24	18	1.83699	0.103894	0.86192	24
CG1969.f(modencode)	0.0220238	0.334493	24	18	1.44554	0.0849885	0.849753	24
CG1969-RB(modencode)	0.0220238	0.334493	24	18	1.3527	0.106201	0.863127	24
CG2144.a(modencode)	0.0220238	0.334493	24	18	0.209657	0.177241	0.885507	24
CG2144-RA(modencode)	0.0220238	0.334493	24	18	0.208667	0.177248	0.885508	24
CG30116-RA(modencode)	0.0220238	0.334493	24	18	0.187171	0.116734	0.868066	24
CG30116-RD(modencode)	0.0220238	0.334493	24	18	0.208172	0.120281	0.869545	24
CG30389-RC(modencode)	0.0220238	0.334493	24	18	2.6211	0.308717	0.90037	24
CG30419-RA(modencode)	0.0220238	0.334493	24	18	0.89152	0.434987	0.922104	24
CG30497.a(modencode)	0.0220238	0.334493	24	12	72.9811	0.0100384	0.729725	24
CG30497.b(modencode)	0.0220238	0.334493	24	12	71.1679	0.00848457	0.714862	24
CG30497.f(modencode)	0.0220238	0.334493	24	12	76.2782	0.00873114	0.717528	24
CG30497-RA(modencode)	0.0220238	0.334493	24	12	49.4522	0.0113081	0.739147	24
CG30497-RB(modencode)	0.0220238	0.334493	24	12	67.4755	0.00804298	0.709734	24
CG30497-RC(modencode)	0.0220238	0.334493	24	12	71.9482	0.0103439	0.73218	24
CG3077.a(modencode)	0.0220238	0.334493	24	18	0.549563	0.0295969	0.788914	24
CG3077-RA(modencode)	0.0220238	0.334493	24	18	0.513501	0.0296041	0.788922	24
CG31108-RA(modencode)	0.0220238	0.334493	24	18	2.46816	0.226815	0.893073	24
CG31145.a(modencode)	0.0220238	0.334493	24	18	2.60512	0.362833	0.908038	24
CG31550.a(modencode)	0.0220238	0.334493	24	18	2.66282	0.34318	0.903281	24
CG31550-IP15611(modencode)	0.0220238	0.334493	24	18	4.76639	0.300636	0.899823	24
CG31550-RB(modencode)	0.0220238	0.334493	24	18	2.8384	0.325943	0.901448	24
CG31550-RC(modencode)	0.0220238	0.334493	24	18	2.77957	0.341045	0.902734	24
CG31665.a(modencode)	0.0220238	0.334493	24	18	9.61517	0.62466	0.944443	24
CG31665.b(modencode)	0.0220238	0.334493	24	18	9.5994	0.624665	0.944443	24
CG31665.c(modencode)	0.0220238	0.334493	24	18	9.42715	0.604873	0.942729	24
CG31665.d(modencode)	0.0220238	0.334493	24	18	9.31854	0.602818	0.942545	24
CG31665.e(modencode)	0.0220238	0.334493	24	18	9.30135	0.603057	0.942567	24
CG31665.f(modencode)	0.0220238	0.334493	24	18	9.30291	0.603059	0.942567	24
CG31665.g(modencode)	0.0220238	0.334493	24	18	9.61347	0.603496	0.942606	24
CG31665-RA(modencode)	0.0220238	0.334493	24	18	9.21021	0.603204	0.94258	24
CG31665-RB(modencode)	0.0220238	0.334493	24	18	9.28	0.603057	0.942567	24
CG32137.b(modencode)	0.0220238	0.334493	24	18	0.0968736	0.140595	0.87665	24
CG32137-RB(modencode)	0.0220238	0.334493	24	18	0.0958837	0.140617	0.876656	24
CG3225-RA(modencode)	0.0220238	0.334493	24	21	0.276832	0.236884	0.894234	24
CG32816-RC(modencode)	0.0220238	0.334493	24	18	0.342098	0.0286405	0.787819	24
CG32850-RA(modencode)	0.0220238	0.334493	24	3	1.79513	0.0608658	0.824406	24
CG33170-RB(modencode)	0.0220238	0.334493	24	6	1.53584	0.0374256	0.795844	24
CG33267-RA(modencode)	0.0220238	0.334493	24	18	18.5061	0.0728328	0.838892	24
CG33521.b(modencode)	0.0220238	0.334493	24	3	4.52697	0.0807258	0.846286	24
CG33521.c(modencode)	0.0220238	0.334493	24	3	4.79715	0.0806414	0.846214	24
CG33521.d(modencode)	0.0220238	0.334493	24	3	4.75282	0.0794968	0.845223	24
CG33521.e(modencode)	0.0220238	0.334493	24	3	4.79631	0.0803732	0.845984	24
CG33521.g(modencode)	0.0220238	0.334493	24	3	4.78337	0.0798948	0.845571	24
CG33521-RD(modencode)	0.0220238	0.334493	24	3	4.59641	0.0806101	0.846187	24
CG33558-RB(modencode)	0.0220238	0.334493	24	19.5	2.26773	0.149796	0.879262	24
CG3358.a(modencode)	0.0220238	0.334493	24	19.5	0.734684	0.0875519	0.851687	24
CG3358-RA(modencode)	0.0220238	0.334493	24	18	0.35419	0.117607	0.868438	24
CG3358-RC(modencode)	0.0220238	0.334493	24	19.5	0.73677	0.0875561	0.85169	24
CG34108.a(modencode)	0.0220238	0.334493	24	18	6.87181	0.603232	0.942582	16
CG34118-RA(modencode)	0.0220238	0.334493	24	18	9.59268	0.0644312	0.829229	24
CG34383-RB(modencode)	0.0220238	0.334493	24	18	1.90389	0.0498241	0.805644	24
CG34383-RC(modencode)	0.0220238	0.334493	24	18	1.36995	0.0646449	0.829502	24
CG34383-RF(modencode)	0.0220238	0.334493	24	18	1.78431	0.0520914	0.810067	24
CG3678-RA(modencode)	0.0220238	0.334493	24	18	0.61886	0.28681	0.898817	24
CG3704.a(modencode)	0.0220238	0.334493	24	18	4.60496	0.291614	0.899177	24
CG3756-RA(modencode)	0.0220238	0.334493	24	3	0.532805	0.00501123	0.655112	24
CG3797.b(modencode)	0.0220238	0.334493	24	18	0.279236	0.0613477	0.825088	24
CG3797-RA(modencode)	0.0220238	0.334493	24	18	0.313955	0.0701022	0.835982	24
CG3996.a(modencode)	0.0220238	0.334493	24	18	7.17119	0.60314	0.942574	16
CG3996.b(modencode)	0.0220238	0.334493	24	18	7.68349	0.594727	0.941809	16
CG3996-RA(modencode)	0.0220238	0.334493	24	18	7.65507	0.579022	0.940325	16
CG40191.a(modencode)	0.0220238	0.334493	24	6	2.88874	0.160726	0.881994	24
CG40191.b(modencode)	0.0220238	0.334493	24	6	2.88874	0.15816	0.881385	24
CG40191.c(modencode)	0.0220238	0.334493	24	6	4.3801	0.20689	0.890453	24
CG40191.d(modencode)	0.0220238	0.334493	24	6	5.66364	0.0838576	0.848865	24
CG40191-RA(modencode)	0.0220238	0.334493	24	6	2.63404	0.173717	0.884811	24
CG40191-RB(modencode)	0.0220238	0.334493	24	6	2.62598	0.158227	0.881401	24
CG40191-RC(modencode)	0.0220238	0.334493	24	6	3.94035	0.204526	0.89011	24
CG4022.a(modencode)	0.0220238	0.334493	24	18	3.09062	0.331997	0.901801	24
CG4022.b(modencode)	0.0220238	0.334493	24	18	2.06327	0.35039	0.905082	12
CG4022.d(modencode)	0.0220238	0.334493	24	18	1.93139	0.369603	0.90957	12
CG4022.e(modencode)	0.0220238	0.334493	24	18	2.32956	0.346061	0.904009	24
CG4064.a(modencode)	0.0220238	0.334493	24	18	0.00565685	0.39496	0.914882	12
CG42235-RE(modencode)	0.0220238	0.334493	24	3	0.860054	0.0171751	0.765855	24
CG42307-RA(modencode), mus312-RD(modencode)	0.0220238	0.334493	24	18	0.393646	0.331833	0.901792	24
CG42307-RB(modencode), mus312-RA(modencode)	0.0220238	0.334493	24	18	0.394283	0.331826	0.901791	24
CG42321.c(modencode)	0.0220238	0.334493	24	18	3.98115	0.109017	0.864535	24
CG42321.d(modencode)	0.0220238	0.334493	24	18	4.10143	0.109205	0.864626	24
CG42321.e(modencode)	0.0220238	0.334493	24	18	4.10412	0.10906	0.864556	24
CG42321-RE(modencode)	0.0220238	0.334493	24	18	2.77356	0.302054	0.899921	24
CG42321-RJ(modencode)	0.0220238	0.334493	24	18	4.04592	0.10903	0.864541	24
CG42321-RK(modencode)	0.0220238	0.334493	24	18	2.69655	0.284166	0.898614	24
CG42321-RM(modencode)	0.0220238	0.334493	24	18	2.87835	0.297761	0.899621	24
CG4238.a(modencode)	0.0220238	0.334493	24	18	4.0042	0.348976	0.904734	24
CG4238.b(modencode)	0.0220238	0.334493	24	18	4.26767	0.329068	0.901632	24
CG4238.d(modencode)	0.0220238	0.334493	24	18	4.45046	0.339811	0.902416	24
CG4238.e(modencode)	0.0220238	0.334493	24	18	4.12165	0.359098	0.90717	24
CG4238.f(modencode)	0.0220238	0.334493	24	18	4.48306	0.338692	0.902177	24
CG4238.g(modencode)	0.0220238	0.334493	24	18	4.46022	0.338994	0.902204	24
CG4238.h(modencode)	0.0220238	0.334493	24	18	4.08036	0.348975	0.904734	24
CG4238.i(modencode)	0.0220238	0.334493	24	18	4.11324	0.347019	0.904249	24
CG4238.j(modencode)	0.0220238	0.334493	24	18	4.15871	0.359753	0.907324	24
CG4238.k(modencode)	0.0220238	0.334493	24	18	4.16677	0.35892	0.907129	24
CG4238-RE(modencode)	0.0220238	0.334493	24	18	4.26817	0.357943	0.906899	24
CG4238-RF(modencode)	0.0220238	0.334493	24	18	4.02853	0.34898	0.904736	24
CG4282-RA(modencode)	0.0220238	0.334493	24	18	0.477226	0.175196	0.885106	24
CG4495-RA(modencode)	0.0220238	0.334493	24	19.5	2.58257	0.0189171	0.770798	24
CG4495-RB(modencode)	0.0220238	0.334493	24	19.5	2.52483	0.019038	0.77111	24
CG4496-RA(modencode)	0.0220238	0.334493	24	18	0.251659	0.0877086	0.851802	24
CG4996-RA(modencode)	0.0220238	0.334493	24	18	0.487197	0.66652	0.947749	24
CG5694.a(modencode)	0.0220238	0.334493	24	6	2.41541	0.114071	0.866898	24
CG5694.c(modencode)	0.0220238	0.334493	24	6	2.20985	0.130116	0.873248	24
CG5694-RA(modencode)	0.0220238	0.334493	24	6	2.24825	0.127352	0.872262	24
CG5694-RB(modencode)	0.0220238	0.334493	24	6	2.00811	0.132216	0.87397	24
CG5937.d(modencode)	0.0220238	0.334493	24	18	0.336583	0.302649	0.899962	24
CG5937.e(modencode)	0.0220238	0.334493	24	18	0.348533	0.301337	0.899872	24
CG6353.a(modencode)	0.0220238	0.334493	24	0	0.507208	0.02631	0.784832	24
CG6353.b(modencode)	0.0220238	0.334493	24	0	0.58605	0.0198536	0.773119	24
CG6353-RA(modencode)	0.0220238	0.334493	24	0	0.458771	0.029486	0.78879	24
CG6812.a(modencode)	0.0220238	0.334493	24	18	1.35079	0.0443478	0.799991	24
CG6951-RA(modencode)	0.0220238	0.334493	24	6	0.430699	0.0479358	0.801682	24
CG6966.c(modencode)	0.0220238	0.334493	24	18	0.973403	0.640985	0.945781	16
CG7177.b(modencode)	0.0220238	0.334493	24	18	2.64408	0.220183	0.892252	24
CG7536-RA(modencode)	0.0220238	0.334493	24	18	2.21162	0.0538571	0.813284	24
CG7536-RB(modencode)	0.0220238	0.334493	24	18	0.674863	0.0591368	0.821881	24
CG7565-RA(modencode)	0.0220238	0.334493	24	18	0.247417	0.0385468	0.796614	24
CG7565-RB(modencode)	0.0220238	0.334493	24	18	0.24579	0.0385531	0.796618	24
CG7638-RA(modencode)	0.0220238	0.334493	24	18	2.89751	0.194865	0.888622	24
CG7646-RA(modencode)	0.0220238	0.334493	24	6	4.53001	0.24549	0.895154	24
CG7777-MIP17260(modencode)	0.0220238	0.334493	24	3	0.207677	0.169425	0.883926	24
CG7852.a(modencode)	0.0220238	0.334493	24	18	0.551331	0.258079	0.896391	24
CG7852.b(modencode)	0.0220238	0.334493	24	18	0.564695	0.2481	0.89542	24
CG7852-RA(modencode)	0.0220238	0.334493	24	18	0.538745	0.264936	0.897016	24
CG7852-RB(modencode)	0.0220238	0.334493	24	18	0.546452	0.252333	0.895841	24
CG7852-RC(modencode)	0.0220238	0.334493	24	18	0.509824	0.249281	0.895539	24
CG8379.a(modencode)	0.0220238	0.334493	24	19.5	0.587924	0.252818	0.895888	24
CG8412.a(modencode)	0.0220238	0.334493	24	21	0.627062	0.135808	0.875157	24
CG8412-RA(modencode)	0.0220238	0.334493	24	21	0.616102	0.144725	0.877862	24
CG8486.m(modencode)	0.0220238	0.334493	24	21	0.324916	0.203296	0.889928	24
CG8486.s(modencode)	0.0220238	0.334493	24	21	0.33036	0.208523	0.890686	24
CG8679-LD14822(modencode)	0.0220238	0.334493	24	18	0.2378	0.0267062	0.785375	24
CG9003.e(modencode)	0.0220238	0.334493	24	18	0.649619	0.225519	0.892916	24
CG9003.f(modencode), CG9003.b(modencode)	0.0220238	0.334493	24	18	0.990091	0.309747	0.900438	24
CG9003-RA(modencode)	0.0220238	0.334493	24	18	1.58618	0.237223	0.894272	24
CG9003-RB(modencode)	0.0220238	0.334493	24	18	1.19452	0.238677	0.894431	24
CG9003-RD(modencode)	0.0220238	0.334493	24	18	0.755826	0.201206	0.889614	24
CG9005-RA(modencode)	0.0220238	0.334493	24	18	1.63582	0.101142	0.860413	24
CG9339.c(modencode)	0.0220238	0.334493	24	18	1.28283	0.073188	0.839256	24
CG9776.a(modencode)	0.0220238	0.334493	24	18	1.35863	0.300983	0.899847	24
CG9776.b(modencode)	0.0220238	0.334493	24	18	1.32031	0.300979	0.899847	24
CG9776-RA(modencode)	0.0220238	0.334493	24	18	1.21601	0.324263	0.901348	24
chr2R_15224905_15225319.0(modencode)	0.0220238	0.334493	24	18	0.517531	0.073239	0.839308	24
chr2R_20583783_20584353.0(modencode)	0.0220238	0.334493	24	18	15.3912	0.207466	0.890536	24
chr3L_18053757_18054906.0(modencode)	0.0220238	0.334493	24	19.5	9.80524	0.0234924	0.780471	24
chr3R_1636093_1636441.0(modencode)	0.0220238	0.334493	24	15	78.8185	0.23379	0.893888	24
chr3R_9991708_9992662.0(modencode)	0.0220238	0.334493	24	18	11.0636	0.164124	0.882772	24
coilin-RC(modencode)	0.0220238	0.334493	24	0	0.37208	0.147541	0.878651	24
coilin-RD(modencode)	0.0220238	0.334493	24	0	0.364301	0.152074	0.879863	24
CrebB-17A.a(modencode)	0.0220238	0.334493	24	18	4.70884	0.245861	0.895192	24
CrebB-17A.b(modencode)	0.0220238	0.334493	24	18	5.04499	0.23051	0.893511	24
CrebB-17A.c(modencode)	0.0220238	0.334493	24	18	5.30097	0.224891	0.89284	24
CrebB-17A.f(modencode)	0.0220238	0.334493	24	18	4.92988	0.239998	0.894574	24
CrebB-17A.o(modencode)	0.0220238	0.334493	24	18	4.93971	0.280278	0.898308	24
cwo.d(modencode)	0.0220238	0.334493	24	13.5	2.57861	0.162278	0.882353	24
cwo.f(modencode)	0.0220238	0.334493	24	13.5	2.90349	0.0896891	0.853222	24
cwo.g(modencode)	0.0220238	0.334493	24	13.5	2.90586	0.0896928	0.853224	24
CYLD-RA(modencode)	0.0220238	0.334493	24	21	3.7664	0.279482	0.898244	24
CYLD-RC(modencode)	0.0220238	0.334493	24	21	3.65277	0.195292	0.888691	24
Daxx-RA(modencode)	0.0220238	0.334493	24	18	1.0579	0.181067	0.886233	24
Dg-IP15543(modencode)	0.0220238	0.334493	24	18	1.68355	0.0502674	0.806536	24
Dg-RC(modencode)	0.0220238	0.334493	24	18	2.4234	0.0982912	0.858769	24
dlg1.h(modencode)	0.0220238	0.334493	24	15	5.35188	0.138328	0.875955	24
Dlic.c(modencode)	0.0220238	0.334493	24	18	4.85634	0.00203746	0.504708	24
DMG4-MB6.chr3R.35.021.a(modencode)	0.0220238	0.334493	24	3	0.0869034	0.0198699	0.773157	24
DmsR-1-RA(modencode)	0.0220238	0.334493	24	18	0.732068	0.131521	0.873733	24
dpr7.b(modencode)	0.0220238	0.334493	24	6	21.6335	0.0681181	0.833735	24
dpr7-IP15667(modencode)	0.0220238	0.334493	24	6	20.3963	0.0555138	0.816138	24
dpr7-RC(modencode)	0.0220238	0.334493	24	6	20.4175	0.060874	0.824418	24
dpr7-RD(modencode)	0.0220238	0.334493	24	6	19.5946	0.0610795	0.82471	24
Drep-1-RA(modencode)	0.0220238	0.334493	24	15	2.96766	0.252984	0.895904	24
Dscam-HL02328(modencode)	0.0220238	0.334493	24	18	0.982808	0.121224	0.869925	24
Dyb.e(modencode)	0.0220238	0.334493	24	19.5	1.18773	0.0918331	0.854695	24
Eip78C.c(modencode)	0.0220238	0.334493	24	18	0.95219	0.187217	0.88734	24
Eip78C.e(modencode)	0.0220238	0.334493	24	18	1.24055	0.131442	0.873706	24
Eip78C.i(modencode)	0.0220238	0.334493	24	18	0.803203	0.188817	0.887616	24
enc.b(modencode)	0.0220238	0.334493	24	18	6.67664	0.1612	0.882104	24
Epac.a(modencode)	0.0220238	0.334493	24	18	0.70746	0.394615	0.914814	12
Epac-RC(modencode)	0.0220238	0.334493	24	18	0.620415	0.473507	0.927985	12
Epac-RD(modencode)	0.0220238	0.334493	24	18	0.546735	0.467676	0.927152	24
Eps-15-RA(modencode)	0.0220238	0.334493	24	18	1.02071	0.10601	0.863029	24
Eps-15-RB(modencode)	0.0220238	0.334493	24	18	1.05225	0.106983	0.863524	24
faf-RC(modencode)	0.0220238	0.334493	24	18	1.76607	0.15756	0.88124	24
Fas2.c(modencode)	0.0220238	0.334493	24	19.5	2.2229	0.14673	0.878427	24
Fas2-RA(modencode)	0.0220238	0.334493	24	19.5	2.17969	0.151192	0.879632	24
Frq1-RC(modencode)	0.0220238	0.334493	24	18	5.02152	0.420536	0.919643	24
fru-RC(modencode)	0.0220238	0.334493	24	18	2.33147	0.553603	0.937755	24
ftz-f1.a(modencode)	0.0220238	0.334493	24	18	4.36306	0.253756	0.895979	24
ftz-f1-RB(modencode)	0.0220238	0.334493	24	18	6.89931	0.279962	0.898283	24
Gclc.a(modencode)	0.0220238	0.334493	24	21	2.33819	0.0240834	0.781466	24
Gclc.c(modencode)	0.0220238	0.334493	24	21	2.36669	0.0232	0.779961	24
Gclc-RA(modencode)	0.0220238	0.334493	24	21	2.25164	0.0230582	0.779709	24
Gclc-RB(modencode)	0.0220238	0.334493	24	21	2.4031	0.0228025	0.779248	24
GlcAT-S-RC(modencode)	0.0220238	0.334493	24	18	3.67003	0.0104393	0.73292	24
G-oalpha47A-MIP20783(modencode)	0.0220238	0.334493	24	18	41.7457	0.518764	0.933852	16
gol.a(modencode)	0.0220238	0.334493	24	15	8.31169	0.0456598	0.80064	24
Golgin84.a(modencode)	0.0220238	0.334493	24	18	1.03676	0.0778872	0.843785	24
Golgin84-RA(modencode)	0.0220238	0.334493	24	18	0.971706	0.077877	0.843776	24
Gpdh.a(modencode)	0.0220238	0.334493	24	15	3.32001	0.282997	0.898523	24
Gpdh.d(modencode)	0.0220238	0.334493	24	15	3.73975	0.273148	0.897725	24
Gpdh-RC(modencode)	0.0220238	0.334493	24	15	3.44142	0.317961	0.900963	24
Grip163-RA(modencode)	0.0220238	0.334493	24	18	0.633356	0.103862	0.861903	24
Gyc88E.a(modencode)	0.0220238	0.334493	24	18	0.158392	0.313395	0.900675	24
Gyc88E.c(modencode)	0.0220238	0.334493	24	18	0.15917	0.313366	0.900673	24
Gyc88E.d(modencode)	0.0220238	0.334493	24	18	0.159028	0.313406	0.900675	24
hkl.b(modencode)	0.0220238	0.334493	24	18	7.14036	0.193125	0.888339	24
hkl.c(modencode)	0.0220238	0.334493	24	18	6.63804	0.193237	0.888357	24
hkl-RA(modencode)	0.0220238	0.334493	24	18	7.51647	0.193126	0.888339	24
Hrs-RA(modencode)	0.0220238	0.334493	24	12	0.194172	0.197455	0.889035	24
Hydr2.a(modencode)	0.0220238	0.334493	24	18	12.0432	0.159971	0.881817	24
Hydr2.b(modencode)	0.0220238	0.334493	24	18	11.5001	0.160039	0.881833	24
Hydr2.d(modencode)	0.0220238	0.334493	24	18	9.44115	0.20825	0.890648	24
Hydr2-RA(modencode)	0.0220238	0.334493	24	18	11.4406	0.159788	0.881773	24
Ih.q(modencode)	0.0220238	0.334493	24	18	17.7231	0.295568	0.899465	24
Ih.r(modencode)	0.0220238	0.334493	24	18	17.3356	0.295386	0.899452	24
Ih.s(modencode)	0.0220238	0.334493	24	18	17.6739	0.295566	0.899465	24
Ih.t(modencode)	0.0220238	0.334493	24	18	17.3832	0.295386	0.899452	24
IM1-RA(modencode)	0.0220238	0.334493	24	9	0.0215668	0.124701	0.871277	24
Invadolysin.a(modencode)	0.0220238	0.334493	24	3	1.76352	0.0824716	0.847746	24
Invadolysin-RA(modencode)	0.0220238	0.334493	24	3	9.71982	0.124933	0.871365	24
itp-RD(modencode)	0.0220238	0.334493	24	3	3.09621	0.213985	0.89144	24
JIL-1.a(modencode)	0.0220238	0.334493	24	18	1.50105	0.0344578	0.793574	24
kek3.c(modencode)	0.0220238	0.334493	24	18	7.535	0.321403	0.901175	24
kek3-RB(modencode)	0.0220238	0.334493	24	18	8.25109	0.324445	0.901359	24
lola-RA(modencode)	0.0220238	0.334493	24	18	4.80359	0.233456	0.89385	12
lola-RB(modencode)	0.0220238	0.334493	24	18	5.33258	0.239359	0.894505	24
lola-RC(modencode)	0.0220238	0.334493	24	18	2.61622	0.329587	0.901662	12
lola-RD(modencode)	0.0220238	0.334493	24	18	4.60284	0.190784	0.88795	24
lola-RE(modencode)	0.0220238	0.334493	24	18	4.28839	0.195282	0.888689	12
lola-RH(modencode)	0.0220238	0.334493	24	18	3.89849	0.317012	0.900904	12
lola-RI(modencode)	0.0220238	0.334493	24	18	3.10738	0.331006	0.901744	12
lola-RK(modencode)	0.0220238	0.334493	24	18	8.45191	0.217172	0.891863	24
lola-RM(modencode)	0.0220238	0.334493	24	18	6.57928	0.245567	0.895161	12
lola-RN(modencode)	0.0220238	0.334493	24	18	2.4777	0.313845	0.900703	12
lola-RO(modencode)	0.0220238	0.334493	24	18	1.83063	0.294746	0.899406	12
lola-RP(modencode)	0.0220238	0.334493	24	18	1.34591	0.358123	0.906941	12
lola-RQ(modencode)	0.0220238	0.334493	24	18	6.74325	0.230965	0.893564	24
lola-RR(modencode)	0.0220238	0.334493	24	18	3.62951	0.225884	0.892961	24
lola-RS(modencode)	0.0220238	0.334493	24	18	5.60976	0.214019	0.891445	24
lola-RT(modencode)	0.0220238	0.334493	24	18	7.77718	0.219873	0.892213	24
lola-RU(modencode)	0.0220238	0.334493	24	18	7.32421	0.225007	0.892854	24
lola-RV(modencode)	0.0220238	0.334493	24	18	4.34255	0.230987	0.893566	12
lola-RW(modencode)	0.0220238	0.334493	24	18	2.26274	0.31445	0.900742	12
lola-RX(modencode)	0.0220238	0.334493	24	18	3.0325	0.317083	0.900908	12
lola-RY(modencode)	0.0220238	0.334493	24	18	3.65419	0.309729	0.900437	12
lola-RZ(modencode)	0.0220238	0.334493	24	18	6.18096	0.219296	0.892139	24
loqs.a(modencode)	0.0220238	0.334493	24	3	0.597859	0.0632879	0.827736	24
loqs-RB(modencode)	0.0220238	0.334493	24	3	0.597081	0.0632873	0.827735	24
loqs-RC(modencode)	0.0220238	0.334493	24	3	0.538533	0.069972	0.835838	24
LpR2.a(modencode)	0.0220238	0.334493	24	18	2.57451	0.131944	0.873878	24
LpR2.b(modencode)	0.0220238	0.334493	24	18	2.67343	0.130168	0.873266	24
LpR2.c(modencode)	0.0220238	0.334493	24	18	2.69401	0.140471	0.876612	24
LpR2.e(modencode)	0.0220238	0.334493	24	18	2.54276	0.134384	0.874694	24
LpR2-RA(modencode)	0.0220238	0.334493	24	18	2.70065	0.172871	0.88464	24
LpR2-RB(modencode)	0.0220238	0.334493	24	18	2.72731	0.138073	0.875876	24
LpR2-RC(modencode)	0.0220238	0.334493	24	18	2.61064	0.166504	0.883299	24
LpR2-RE(modencode)	0.0220238	0.334493	24	18	2.5185	0.160276	0.881888	24
LpR2-RF(modencode)	0.0220238	0.334493	24	18	2.64366	0.132708	0.874136	24
LpR2-RG(modencode)	0.0220238	0.334493	24	18	2.6303	0.166695	0.883341	24
Magi-RA(modencode)	0.0220238	0.334493	24	3	0.286803	0.200416	0.889494	24
mbl-RB(modencode)	0.0220238	0.334493	24	3	6.7977	0.207113	0.890485	24
Mbs.a(modencode)	0.0220238	0.334493	24	18	1.14099	0.216092	0.891721	12
Mbs.b(modencode)	0.0220238	0.334493	24	18	1.03902	0.219221	0.892129	12
Mbs.c(modencode)	0.0220238	0.334493	24	18	1.16128	0.216608	0.891789	12
mib2.b(modencode)	0.0220238	0.334493	24	18	1.71113	0.0638334	0.828454	24
Mical-RE(modencode), Mical.c(modencode)	0.0220238	0.334493	24	18	0.199051	0.0546941	0.814745	24
mp-MIP20649(modencode)	0.0220238	0.334493	24	15	2.41915	0.341994	0.902978	24
mRpL14-RA(modencode)	0.0220238	0.334493	24	21	0.368403	0.296067	0.899501	24
nc_11800.b(modencode)	0.0220238	0.334493	24	3	2.32871	0.00158264	0.470777	24
nc_14406.a(modencode)	0.0220238	0.334493	24	6	10.2818	0.252207	0.895828	24
nc_15575.a(modencode)	0.0220238	0.334493	24	18	42.5248	0.125519	0.871585	24
nc_18451.a(modencode)	0.0220238	0.334493	24	19.5	58.8159	0.0706212	0.83655	24
nc_21259.b(modencode)	0.0220238	0.334493	24	18	5.84431	0.288151	0.898919	24
nc_3434.a(modencode)	0.0220238	0.334493	24	12	0.08358	0.116062	0.867776	24
nc_3435.a(modencode)	0.0220238	0.334493	24	12	0.0868327	0.116067	0.867778	24
nc_3436.a(modencode)	0.0220238	0.334493	24	12	0.1871	0.1343	0.874666	24
nc_3500.a(modencode)	0.0220238	0.334493	24	6	1.94808	0.069744	0.835584	24
nc_6165.a(modencode)	0.0220238	0.334493	24	15	0.412597	0.0249022	0.78277	24
nc_6833.a(modencode)	0.0220238	0.334493	24	6	61.7374	0.0151917	0.758954	24
Nedd4-RF(modencode)	0.0220238	0.334493	24	19.5	1.58212	0.0194833	0.772226	24
Nf1.a(modencode)	0.0220238	0.334493	24	18	0.1055	0.226663	0.893055	24
Nf1-RB(modencode)	0.0220238	0.334493	24	18	0.12834	0.229078	0.893343	24
Nhe1-RB(modencode)	0.0220238	0.334493	24	18	0.914289	0.188061	0.887486	24
Nos-RC(modencode)	0.0220238	0.334493	24	18	0.226416	0.208047	0.890619	24
Nos-RD(modencode)	0.0220238	0.334493	24	18	0.224224	0.200712	0.889539	24
Nos-RG(modencode)	0.0220238	0.334493	24	18	0.420941	0.154647	0.88052	24
Nos-RJ(modencode)	0.0220238	0.334493	24	18	0.406728	0.154617	0.880513	24
p130CAS-RB(modencode)	0.0220238	0.334493	24	18	0.972838	0.187143	0.887327	24
p130CAS-RD(modencode)	0.0220238	0.334493	24	18	0.601253	0.181406	0.886296	24
p130CAS-RE(modencode)	0.0220238	0.334493	24	18	0.970787	0.192242	0.888193	24
p130CAS-RF(modencode)	0.0220238	0.334493	24	18	0.997586	0.18714	0.887326	24
Pak-RD(modencode)	0.0220238	0.334493	24	15	0.7303	0.679329	0.948684	12
Pdp1.f(modencode)	0.0220238	0.334493	24	15	63.7079	0.22958	0.893402	24
Pdp1.h(modencode)	0.0220238	0.334493	24	15	63.5182	0.229399	0.893381	24
Pdp1.u(modencode)	0.0220238	0.334493	24	15	58.3299	0.253327	0.895938	24
Pdp1.v(modencode)	0.0220238	0.334493	24	15	57.4464	0.259075	0.896483	24
pho.a(modencode)	0.0220238	0.334493	24	6	37.5257	0.141768	0.877001	24
pho-RA(modencode)	0.0220238	0.334493	24	6	34.0648	0.140951	0.876757	24
pho-RB(modencode)	0.0220238	0.334493	24	6	40.2888	0.142278	0.877152	24
Pka-C3-RA(modencode)	0.0220238	0.334493	24	19.5	1.65611	0.0748798	0.840946	24
pncr003:2L-RA(modencode)	0.0220238	0.334493	24	12	0.086267	0.116022	0.867758	24
pncr003:2L-RB(modencode)	0.0220238	0.334493	24	12	0.179181	0.134281	0.87466	24
Pp1alpha-96A.b(modencode)	0.0220238	0.334493	24	21	24.5064	0.114866	0.867252	24
Pp1alpha-96A-RA(modencode)	0.0220238	0.334493	24	21	24.3498	0.13804	0.875865	24
ps.ab(modencode)	0.0220238	0.334493	24	18	17.9911	0.155761	0.880799	24
ps.ac(modencode)	0.0220238	0.334493	24	18	18.0327	0.161852	0.882255	24
ps.ad(modencode)	0.0220238	0.334493	24	18	38.6959	0.0938294	0.85601	24
ps.ae(modencode)	0.0220238	0.334493	24	18	36.3727	0.0832368	0.848368	24
ps.af(modencode)	0.0220238	0.334493	24	18	38.8114	0.0938379	0.856015	24
ps.ag(modencode)	0.0220238	0.334493	24	18	36.8267	0.0991475	0.859272	24
ps.ah(modencode)	0.0220238	0.334493	24	18	34.6279	0.0880943	0.852083	24
ps.ai(modencode)	0.0220238	0.334493	24	18	36.8469	0.099166	0.859283	24
ps.aj(modencode)	0.0220238	0.334493	24	18	36.6817	0.082934	0.848123	24
ps.ak(modencode)	0.0220238	0.334493	24	18	36.7295	0.0830263	0.848198	24
ps.al(modencode)	0.0220238	0.334493	24	18	36.4328	0.0829203	0.848112	24
ps.am(modencode)	0.0220238	0.334493	24	18	37.1984	0.0967447	0.857839	24
ps.ar(modencode)	0.0220238	0.334493	24	18	39.1353	0.0950748	0.856804	24
ps.av(modencode)	0.0220238	0.334493	24	18	22.958	0.194226	0.888519	24
ps.ax(modencode)	0.0220238	0.334493	24	18	24.8469	0.212811	0.891281	24
ps.h(modencode)	0.0220238	0.334493	24	18	47.4595	0.521624	0.934191	24
ps.j(modencode)	0.0220238	0.334493	24	18	47.507	0.521638	0.934192	24
ps.l(modencode)	0.0220238	0.334493	24	18	23.4868	0.185758	0.887084	24
ps.m(modencode)	0.0220238	0.334493	24	18	23.4796	0.185759	0.887084	24
ps.n(modencode)	0.0220238	0.334493	24	18	25.2449	0.206028	0.890329	24
ps.r(modencode)	0.0220238	0.334493	24	18	48.196	0.532063	0.935398	24
ps-RB(modencode)	0.0220238	0.334493	24	18	5.43468	0.0301446	0.789511	24
Ptp99A.f(modencode)	0.0220238	0.334493	24	18	1.30334	0.151464	0.879703	24
Ptp99A.g(modencode)	0.0220238	0.334493	24	18	1.40382	0.155779	0.880803	24
Ptp99A.h(modencode)	0.0220238	0.334493	24	18	0.951695	0.201573	0.88967	12
Ptp99A.i(modencode)	0.0220238	0.334493	24	18	1.08484	0.170247	0.884099	12
Ptp99A-RB(modencode)	0.0220238	0.334493	24	18	0.824274	0.235246	0.894052	12
pum.a(modencode)	0.0220238	0.334493	24	18	13.5439	0.317504	0.900935	24
pum.b(modencode)	0.0220238	0.334493	24	18	13.4825	0.37414	0.910569	24
pum-RB(modencode)	0.0220238	0.334493	24	18	10.8408	0.269569	0.897421	24
pum-RE(modencode)	0.0220238	0.334493	24	18	13.3626	0.374074	0.910555	24
pyd.e(modencode)	0.0220238	0.334493	24	18	0.395202	0.228869	0.893318	24
pyd-LD43161(modencode)	0.0220238	0.334493	24	18	0.210223	0.0780239	0.843909	24
Rab3-RA(modencode)	0.0220238	0.334493	24	18	91.3426	0.235599	0.894092	24
Rab7.a(modencode)	0.0220238	0.334493	24	6	17.8259	0.0052124	0.660315	24
Rab7.b(modencode)	0.0220238	0.334493	24	6	19.7772	0.00566914	0.671011	24
Rab7.e(modencode)	0.0220238	0.334493	24	6	18.3877	0.00524134	0.661037	24
Rab7-RA(modencode)	0.0220238	0.334493	24	6	17.7945	0.00542353	0.66544	24
rdgB-RB(modencode)	0.0220238	0.334493	24	18	0.897601	0.0710463	0.837011	24
rdgB-RE(modencode)	0.0220238	0.334493	24	21	0.389969	0.0870354	0.851306	24
rdgB-RF(modencode)	0.0220238	0.334493	24	18	0.886358	0.0582995	0.82061	24
rdgB-RG(modencode)	0.0220238	0.334493	24	18	0.892015	0.0588326	0.821423	24
Rgk2.a(modencode)	0.0220238	0.334493	24	15	3.36915	0.0920356	0.85483	24
Rgk2.b(modencode)	0.0220238	0.334493	24	15	3.37467	0.0920275	0.854825	24
Rgk2-RA(modencode)	0.0220238	0.334493	24	15	3.35275	0.0920349	0.85483	24
Rim.e(modencode)	0.0220238	0.334493	24	15	1.07678	0.725337	0.951782	48
S1P-RA(modencode)	0.0220238	0.334493	24	19.5	0.45566	0.0440246	0.799826	24
Sec16.b(modencode)	0.0220238	0.334493	24	15	0.624163	0.185875	0.887104	24
Sec16.c(modencode)	0.0220238	0.334493	24	15	0.594253	0.194862	0.888622	24
Sec16.e(modencode)	0.0220238	0.334493	24	15	0.442578	0.29411	0.89936	24
Sec16-RD(modencode)	0.0220238	0.334493	24	15	0.565685	0.187789	0.887439	24
Sep4-RA(modencode)	0.0220238	0.334493	24	18	14.0064	0.319546	0.901061	24
Sep4-RB(modencode)	0.0220238	0.334493	24	18	13.123	0.317952	0.900963	24
Sep4-RC(modencode)	0.0220238	0.334493	24	18	13.5174	0.110502	0.86525	24
Sep4-RF(modencode)	0.0220238	0.334493	24	18	14.0673	0.125332	0.871515	24
Sep4-RG(modencode)	0.0220238	0.334493	24	18	15.8749	0.299401	0.899737	24
sif-RD(modencode)	0.0220238	0.334493	24	18	0.391808	0.232513	0.893742	12
sif-RE(modencode)	0.0220238	0.334493	24	18	0.583787	0.213763	0.89141	24
SIFR-RA(modencode)	0.0220238	0.334493	24	18	0.810344	0.500007	0.93154	24
SIFR-RB(modencode)	0.0220238	0.334493	24	18	0.789909	0.500004	0.93154	24
SIFR-RC(modencode)	0.0220238	0.334493	24	18	0.763817	0.513011	0.93316	24
smi35A.a(modencode)	0.0220238	0.334493	24	15	45.5344	0.0106536	0.734541	24
smi35A.b(modencode)	0.0220238	0.334493	24	15	45.0318	0.0106478	0.734498	24
smi35A-RA(modencode)	0.0220238	0.334493	24	15	46.0226	0.0106536	0.734541	24
smi35A-RB(modencode)	0.0220238	0.334493	24	15	46.8607	0.0106562	0.73456	24
smi35A-RC(modencode)	0.0220238	0.334493	24	15	44.3879	0.0106528	0.734535	24
smi35A-RD(modencode)	0.0220238	0.334493	24	15	49.3244	0.0104066	0.732668	24
smi35A-RE(modencode)	0.0220238	0.334493	24	15	47.2368	0.0106536	0.73454	24
snmRNA:60Ca-RA(modencode)	0.0220238	0.334493	24	9	1.31161	0.213027	0.891311	24
sno-RA(modencode)	0.0220238	0.334493	24	18	2.69153	0.0657401	0.830881	24
snoRNA:Me28S-G1083b-RA(modencode)	0.0220238	0.334493	24	6	1.51229	0.0812962	0.846769	24
snoRNA:Or-CD9a-RA(modencode)	0.0220238	0.334493	24	9	1.42334	0.1669	0.883385	24
SP71.ab(modencode)	0.0220238	0.334493	24	18	0.0801859	0.212581	0.89125	24
SP71.e(modencode)	0.0220238	0.334493	24	18	0.101187	0.295699	0.899474	24
SP71.k(modencode)	0.0220238	0.334493	24	18	0.107551	0.19595	0.888796	24
SP71.m(modencode)	0.0220238	0.334493	24	18	0.0902268	0.194646	0.888587	24
SP71.n(modencode)	0.0220238	0.334493	24	18	0.0886005	0.171394	0.884337	24
SP71.o(modencode)	0.0220238	0.334493	24	18	0.0914289	0.175185	0.885104	24
SP71.p(modencode)	0.0220238	0.334493	24	18	0.0492146	0.316534	0.900874	24
SP71.q(modencode)	0.0220238	0.334493	24	18	0.0962372	0.194595	0.888579	24
SP71.r(modencode)	0.0220238	0.334493	24	18	0.13336	0.200676	0.889534	24
SP71.s(modencode)	0.0220238	0.334493	24	18	0.0970858	0.198092	0.889135	24
SP71.t(modencode)	0.0220238	0.334493	24	18	0.0902268	0.298778	0.899693	24
SP71.u(modencode)	0.0220238	0.334493	24	18	0.061094	0.21388	0.891426	24
SP71.w(modencode)	0.0220238	0.334493	24	18	0.0496389	0.30868	0.900368	24
SP71.x(modencode)	0.0220238	0.334493	24	18	0.124804	0.20064	0.889528	24
SP71.y(modencode)	0.0220238	0.334493	24	18	0.0912168	0.198133	0.889141	24
SP71.z(modencode)	0.0220238	0.334493	24	18	0.0842164	0.298818	0.899696	24
spag-RA(modencode)	0.0220238	0.334493	24	18	0.652518	0.184401	0.886842	24
ssh.a(modencode)	0.0220238	0.334493	24	18	0.122329	0.245917	0.895197	12
ssh.c(modencode)	0.0220238	0.334493	24	18	0.120845	0.246701	0.895278	12
ssh-RA(modencode)	0.0220238	0.334493	24	18	0.120562	0.246734	0.895281	12
Su(z)2-RB_Su(z)2-RB(modencode)	0.0220238	0.334493	24	18	1.46788	0.325339	0.901413	24
Syt1.d(modencode)	0.0220238	0.334493	24	18	80.8445	0.407348	0.917256	24
Syt1.e(modencode)	0.0220238	0.334493	24	18	80.757	0.407342	0.917255	24
tai.a(modencode)	0.0220238	0.334493	24	18	1.71742	0.069675	0.835508	24
tai.r(modencode)	0.0220238	0.334493	24	18	1.38374	0.0666951	0.832049	12
tai.s(modencode)	0.0220238	0.334493	24	18	1.47976	0.0594971	0.822418	12
tgo-RA(modencode)	0.0220238	0.334493	24	18	1.15117	0.378053	0.911412	16
tRNA:I:49Fd-RA(modencode)	0.0220238	0.334493	24	6	1.04956	0.150689	0.8795	24
Tsp39D-RB(modencode)	0.0220238	0.334493	24	6	0.760918	0.148043	0.878788	24
tws.a(modencode)	0.0220238	0.334493	24	15	3.49898	0.213394	0.891361	24
tws.b(modencode)	0.0220238	0.334493	24	15	3.54169	0.213538	0.89138	24
tws.c(modencode)	0.0220238	0.334493	24	15	3.43498	0.218354	0.892017	24
tws.d(modencode)	0.0220238	0.334493	24	15	3.65433	0.209672	0.890848	24
tws.e(modencode)	0.0220238	0.334493	24	15	3.40429	0.212425	0.891229	24
tws.f(modencode)	0.0220238	0.334493	24	15	3.50584	0.217085	0.891852	24
tws.g(modencode)	0.0220238	0.334493	24	15	3.37092	0.204706	0.890136	24
tws.h(modencode)	0.0220238	0.334493	24	15	3.02415	0.22657	0.893044	24
tws.i(modencode)	0.0220238	0.334493	24	15	3.06276	0.200521	0.88951	24
tws.l(modencode)	0.0220238	0.334493	24	15	3.23862	0.19977	0.889395	24
tws.n(modencode)	0.0220238	0.334493	24	15	3.51156	0.195926	0.888792	24
tws.r(modencode)	0.0220238	0.334493	24	15	3.51566	0.200909	0.889569	24
tws-RA(modencode)	0.0220238	0.334493	24	15	2.96667	0.232125	0.893698	24
tws-RB(modencode)	0.0220238	0.334493	24	15	3.37587	0.218502	0.892036	24
tws-RC(modencode)	0.0220238	0.334493	24	15	3.59734	0.209668	0.890848	24
tws-RD(modencode)	0.0220238	0.334493	24	15	3.59734	0.209293	0.890795	24
tws-RE(modencode)	0.0220238	0.334493	24	15	3.52479	0.210406	0.890951	24
tws-RF(modencode), tws.q(modencode)	0.0220238	0.334493	24	15	3.45485	0.230021	0.893454	24
tws-RG(modencode)	0.0220238	0.334493	24	15	3.13213	0.204187	0.89006	24
tws-RH(modencode)	0.0220238	0.334493	24	15	3.40125	0.212429	0.891229	24
Ugt86De-RA(modencode)	0.0220238	0.334493	24	1.5	0.361049	0.00678295	0.692017	24
unc79-RB(modencode)	0.0220238	0.334493	24	18	0.185969	0.180492	0.886126	24
unc79-RC(modencode)	0.0220238	0.334493	24	18	0.161362	0.18786	0.887451	12
Vha55-RC(modencode)	0.0220238	0.334493	24	18	19.488	0.224479	0.892789	24
vri.b(modencode)	0.0220238	0.334493	24	12	8.28814	0.000445968	0.407999	24
vri.c(modencode)	0.0220238	0.334493	24	12	6.88383	0.000438523	0.407566	24
vri.d(modencode), vri-RA(modencode)	0.0220238	0.334493	24	12	12.3968	0.000637382	0.415815	24
vri-RC(modencode)	0.0220238	0.334493	24	12	8.16963	0.000512555	0.411344	24
vri-RD(modencode)	0.0220238	0.334493	24	12	12.8256	0.000613396	0.415091	24
wdb.ah(modencode)	0.0220238	0.334493	24	18	34.2208	0.119499	0.869226	24
wdb.ai(modencode)	0.0220238	0.334493	24	18	33.8821	0.119011	0.869025	24
wdb.aj(modencode)	0.0220238	0.334493	24	18	34.8858	0.117051	0.868201	24
wdb.e(modencode)	0.0220238	0.334493	24	18	31.1073	0.152774	0.880044	24
wdb.f(modencode)	0.0220238	0.334493	24	18	31.2969	0.1576	0.88125	24
wdb.g(modencode)	0.0220238	0.334493	24	18	30.6154	0.156764	0.881046	24
wdb.h(modencode)	0.0220238	0.334493	24	18	29.8472	0.156663	0.881021	24
wdb.i(modencode)	0.0220238	0.334493	24	18	29.6181	0.155465	0.880725	24
wdb.j(modencode)	0.0220238	0.334493	24	18	29.2194	0.15597	0.88085	24
wdb.k(modencode)	0.0220238	0.334493	24	18	29.1956	0.154073	0.880375	24
wdb.o(modencode)	0.0220238	0.334493	24	18	29.8516	0.156662	0.881021	24
wdb.p(modencode)	0.0220238	0.334493	24	18	29.2236	0.15597	0.88085	24
wdb.q(modencode)	0.0220238	0.334493	24	18	29.9053	0.1539	0.880332	24
wdb.r(modencode)	0.0220238	0.334493	24	18	31.6039	0.154246	0.880419	24
wdb.s(modencode)	0.0220238	0.334493	24	18	31.1086	0.152753	0.880038	24
wdb.v(modencode)	0.0220238	0.334493	24	18	18.4188	0.174793	0.885026	24
wdb.w(modencode)	0.0220238	0.334493	24	18	19.1164	0.173699	0.884808	24
wdb.z(modencode)	0.0220238	0.334493	24	18	28.9105	0.152696	0.880023	24
Zyx102EF.g(modencode)	0.0220238	0.334493	24	6	12.7909	0.039512	0.797242	24
Zyx102EF.h(modencode)	0.0220238	0.334493	24	6	11.4267	0.0395531	0.797269	24
Zyx102EF.i(modencode)	0.0220238	0.334493	24	6	7.60635	0.0407566	0.79801	24
Zyx102EF.j(modencode)	0.0220238	0.334493	24	6	7.54978	0.0402991	0.797733	24
Zyx102EF.k(modencode)	0.0220238	0.334493	24	6	8.26028	0.0439487	0.799787	24
Zyx102EF.l(modencode)	0.0220238	0.334493	24	6	8.55104	0.0438159	0.799718	24
Zyx102EF-RG(modencode)	0.0220238	0.334493	24	6	11.7909	0.039553	0.797268	24
CG17124.a(modencode)	0.0392857	0.393594	24	21	3.60257	0.177356	0.885529	24
CG17124-RB(modencode), CG17124.b(modencode)	0.0392857	0.393594	24	21	3.26316	0.176484	0.88536	24
Amph.a(modencode)	0.0565476	0.393594	24	0	29.155	0.046272	0.80093	24
Amph.b(modencode)	0.0565476	0.393594	24	0	26.4119	0.0450324	0.800334	24
Amph.c(modencode)	0.0565476	0.393594	24	0	26.1357	0.0450919	0.800364	24
Amph.d(modencode)	0.0565476	0.393594	24	0	26.0665	0.0429749	0.799272	24
Amph.e(modencode)	0.0565476	0.393594	24	0	25.8638	0.0428543	0.799207	24
Amph.f(modencode)	0.0565476	0.393594	24	0	25.7559	0.0448954	0.800266	24
Amph.h(modencode)	0.0565476	0.393594	24	0	25.3128	0.0469398	0.801238	24
Amph-RA(modencode)	0.0565476	0.393594	24	0	24.8451	0.0450088	0.800323	24
aret.c(modencode)	0.0565476	0.393594	24	18	1.66467	0.0488156	0.803561	24
CG10246.a(modencode)	0.0565476	0.393594	24	21	0.761342	0.00496972	0.653996	24
CG10466.a(modencode)	0.0565476	0.393594	24	3	1.2228	0.0261985	0.784677	24
CG11486.ab(modencode)	0.0565476	0.393594	24	18	2.12931	0.0188462	0.770614	24
CG11486.ac(modencode)	0.0565476	0.393594	24	18	2.20518	0.0322382	0.791614	24
CG11486.ae(modencode)	0.0565476	0.393594	24	18	2.22215	0.0323185	0.791689	24
CG11486.ah(modencode)	0.0565476	0.393594	24	18	2.19557	0.0322523	0.791627	24
CG11486.aj(modencode)	0.0565476	0.393594	24	18	1.79421	0.0259369	0.784307	24
CG11486.am(modencode)	0.0565476	0.393594	24	18	1.64459	0.0246481	0.782375	24
CG11486.an(modencode)	0.0565476	0.393594	24	18	1.77675	0.0216131	0.776966	24
CG11486.ao(modencode)	0.0565476	0.393594	24	18	2.30644	0.0298125	0.789151	24
CG11486.ap(modencode)	0.0565476	0.393594	24	18	2.35488	0.028654	0.787835	24
CG11486.ar(modencode)	0.0565476	0.393594	24	18	2.32136	0.0307613	0.790159	24
CG11486.as(modencode)	0.0565476	0.393594	24	18	1.57253	0.0215277	0.776793	24
CG11486.au(modencode)	0.0565476	0.393594	24	18	2.29159	0.0317751	0.791172	24
CG11486.av(modencode)	0.0565476	0.393594	24	18	2.28183	0.031903	0.791295	24
CG11486.aw(modencode)	0.0565476	0.393594	24	18	2.28198	0.0317672	0.791164	24
CG11486.ay(modencode)	0.0565476	0.393594	24	18	2.15314	0.0327052	0.792048	24
CG11486.e(modencode)	0.0565476	0.393594	24	18	0.897531	0.0357993	0.794645	12
CG11486.t(modencode)	0.0565476	0.393594	24	18	0.886853	0.0334932	0.792753	12
CG11486.v(modencode)	0.0565476	0.393594	24	18	1.4652	0.024548	0.782216	24
CG11486.x(modencode)	0.0565476	0.393594	24	18	2.18913	0.0321981	0.791576	24
CG13325.b(modencode)	0.0565476	0.393594	24	18	0.0561443	0.0187023	0.770235	12
CG17082.l(modencode)	0.0565476	0.393594	24	4.5	6.98317	0.0426514	0.799096	24
CG17082-RA(modencode)	0.0565476	0.393594	24	4.5	5.88631	0.047371	0.801432	24
CG17544-FI09711(modencode)	0.0565476	0.393594	24	21	0.846407	0.0278518	0.786861	24
CG17544-RC(modencode)	0.0565476	0.393594	24	21	0.958059	0.0151621	0.758838	24
CG17544-RD(modencode)	0.0565476	0.393594	24	21	0.886288	0.0187154	0.77027	24
CG30466.a(modencode)	0.0565476	0.393594	24	6	0.631022	0.0213948	0.776521	24
CG30497.c(modencode)	0.0565476	0.393594	24	12	69.2332	0.00760861	0.704193	24
CG30497.d(modencode)	0.0565476	0.393594	24	12	66.2207	0.00735213	0.70066	24
CG30497.e(modencode)	0.0565476	0.393594	24	12	52.0818	0.0103277	0.732053	24
CG30497.g(modencode)	0.0565476	0.393594	24	12	74.2922	0.00753	0.703132	24
CG31522-RC(modencode)	0.0565476	0.393594	24	13.5	1.24274	0.0137543	0.752815	24
CG33170-AT30788(modencode)	0.0565476	0.393594	24	6	1.61135	0.0251578	0.783161	24
CG34325-RA(modencode)	0.0565476	0.393594	24	4.5	0.790263	0.0217409	0.777222	24
CG3973.a(modencode)	0.0565476	0.393594	24	1.5	26.6598	0.0278441	0.786852	24
CG3973-RA(modencode)	0.0565476	0.393594	24	1.5	24.937	0.0269989	0.785766	24
CG41343.a(modencode)	0.0565476	0.393594	24	6	2.85275	0.0219361	0.777608	24
CG41343.b(modencode)	0.0565476	0.393594	24	6	2.14366	0.0192162	0.771562	24
CG6040.a(modencode)	0.0565476	0.393594	24	3	0.279236	0.0263691	0.784914	24
CG7768.a(modencode)	0.0565476	0.393594	24	9	2.96285	0.0323628	0.791731	24
CG8232.a(modencode)	0.0565476	0.393594	24	21	0.575656	0.0442565	0.799945	24
CG8232.b(modencode)	0.0565476	0.393594	24	21	0.556634	0.0450236	0.80033	24
CG8232.c(modencode)	0.0565476	0.393594	24	21	0.545957	0.0465177	0.801044	24
CG8232-RA(modencode)	0.0565476	0.393594	24	21	0.537118	0.0459757	0.80079	24
CG8918.b(modencode)	0.0565476	0.393594	24	6	1.13639	0.0482803	0.802425	24
CG8918.d(modencode)	0.0565476	0.393594	24	6	1.17351	0.0482698	0.802402	24
CG9339.d(modencode)	0.0565476	0.393594	24	18	1.31041	0.0427191	0.799133	12
chm-RA(modencode)	0.0565476	0.393594	24	18	0.492005	0.044449	0.800043	12
CR41619-RA(modencode)	0.0565476	0.393594	24	3	57.5745	0.00299089	0.575711	24
Drl-2-RB(modencode)	0.0565476	0.393594	24	18	3.57054	0.0276345	0.786588	24
Fs.a(modencode)	0.0565476	0.393594	24	9	1.14113	0.00479264	0.649067	24
Fs.b(modencode)	0.0565476	0.393594	24	9	1.11963	0.00502913	0.655588	24
Fs-RA(modencode)	0.0565476	0.393594	24	9	1.03895	0.00449431	0.640081	24
Gclc.b(modencode)	0.0565476	0.393594	24	21	2.21812	0.0244991	0.782139	24
gol-RB(modencode)	0.0565476	0.393594	24	15	13.2154	0.0428367	0.799197	24
gol-RD(modencode)	0.0565476	0.393594	24	15	13.0156	0.0428771	0.799219	24
Kr-h2.a(modencode)	0.0565476	0.393594	24	6	0.094823	0.0437175	0.799667	24
Kr-h2.c(modencode)	0.0565476	0.393594	24	6	0.163554	0.0355435	0.794447	24
nc_6967.a(modencode)	0.0565476	0.393594	24	9	1.49801	0.0192951	0.77176	24
noncoding_6835-SD22445(modencode)	0.0565476	0.393594	24	6	30.5643	0.0105564	0.733813	24
per.a(modencode)	0.0565476	0.393594	24	15	0.84075	0.00170218	0.480008	24
per-RA(modencode)	0.0565476	0.393594	24	15	0.824699	0.0016693	0.477566	24
Ptr_Dm.a(modencode)	0.0565476	0.393594	24	21	0.385444	0.0274649	0.786373	24
Ptr_Dm.b(modencode)	0.0565476	0.393594	24	21	0.37413	0.0260461	0.784462	24
RecQ5-RA(modencode)	0.0565476	0.393594	24	21	2.64331	0.0383526	0.796484	24
RecQ5-RB(modencode)	0.0565476	0.393594	24	21	2.82836	0.0376481	0.796001	24
Scp2-HL05814(modencode)	0.0565476	0.393594	24	3	16.9212	0.0130731	0.749477	24
snoRNA:U31:54Ec-RA[[2]](modencode)	0.0565476	0.393594	24	7.5	1.43769	0.0217672	0.777275	24
sra.a(modencode)	0.0565476	0.393594	24	6	0	0.0367183	0.795336	24
sra.b(modencode)	0.0565476	0.393594	24	6	0	0.0307216	0.790118	24
sra.c(modencode)	0.0565476	0.393594	24	6	2.51215e-15	0.0366411	0.795279	24
sra-RA(modencode)	0.0565476	0.393594	24	6	0	0.0321601	0.79154	24
tim.b(modencode)	0.0565476	0.393594	24	15	30.5281	0.00403634	0.624324	24
tim.c(modencode)	0.0565476	0.393594	24	15	63.6103	0.0010361	0.423082	24
tim-RC(modencode)	0.0565476	0.393594	24	15	31.0515	0.00409407	0.626458	24
Trn.a(modencode)	0.0565476	0.393594	24	6	3.15023	0.0418809	0.798666	24
Trn.b(modencode)	0.0565476	0.393594	24	6	3.17837	0.0423836	0.798948	24
Trn.c(modencode)	0.0565476	0.393594	24	6	3.17647	0.0423625	0.798937	24
Uhg5-RA(modencode)	0.0565476	0.393594	24	6	27.8444	0.0104499	0.733002	24
Uhg5-RB(modencode)	0.0565476	0.393594	24	6	27.1759	0.0103794	0.732457	24
Uhg5-RD(modencode)	0.0565476	0.393594	24	6	21.5228	0.0129892	0.749044	24
zf30C.a(modencode)	0.0565476	0.393594	24	18	0.574029	0.0430707	0.799324	24
zf30C-RA(modencode)	0.0565476	0.393594	24	18	0.555008	0.0430675	0.799322	24
bves.b(modencode)	0.124603	0.499132	24	15	1.4461	0.0371907	0.795677	24
bves.g(modencode)	0.124603	0.499132	24	15	1.34626	0.0451999	0.800417	24
bves-RB(modencode)	0.124603	0.499132	24	15	1.3126	0.0461008	0.800849	24
Cdc42.a(modencode)	0.124603	0.499132	24	6	6.59292	0.0324492	0.791811	24
Cdc42.b(modencode)	0.124603	0.499132	24	6	6.56612	0.0324503	0.791812	24
CG10077.a(modencode)	0.124603	0.499132	24	16.5	15.8907	0.000516583	0.41152	24
CG10077.c(modencode)	0.124603	0.499132	24	16.5	16.1413	0.000530194	0.412097	24
CG10077-RA(modencode)	0.124603	0.499132	24	16.5	15.5916	0.000531212	0.412139	24
CG10249.a(modencode)	0.124603	0.499132	24	3	0.779585	0.0279158	0.786941	24
CG10249-RA(modencode)	0.124603	0.499132	24	3	0.741684	0.028259	0.787362	24
CG11486.aa(modencode)	0.124603	0.499132	24	18	2.09325	0.037072	0.795592	24
CG11486.ad(modencode)	0.124603	0.499132	24	18	2.20037	0.0332531	0.792542	24
CG11486.af(modencode)	0.124603	0.499132	24	18	2.14564	0.0334357	0.792703	24
CG11486.ag(modencode)	0.124603	0.499132	24	18	2.16163	0.0344999	0.793609	24
CG11486.ai(modencode)	0.124603	0.499132	24	18	2.14204	0.0335511	0.792804	24
CG11486.ak(modencode)	0.124603	0.499132	24	18	2.13228	0.0347507	0.793815	24
CG11486.ax(modencode)	0.124603	0.499132	24	18	2.27512	0.0334102	0.79268	24
CG11486.az(modencode)	0.124603	0.499132	24	18	2.29032	0.032169	0.791549	24
CG11486.w(modencode)	0.124603	0.499132	24	18	2.10442	0.0357232	0.794587	24
CG11486.y(modencode)	0.124603	0.499132	24	18	2.15498	0.0344726	0.793587	24
CG11486.z(modencode)	0.124603	0.499132	24	18	2.14854	0.0335349	0.79279	24
CG14372-MIP15665(modencode)	0.124603	0.499132	24	18	1.06398	0.0174235	0.766616	24
CG14701-RA(modencode)	0.124603	0.499132	24	6	4.68967	0.0266384	0.785283	24
CG14963-RA(modencode)	0.124603	0.499132	24	6	4.41072	0.0320031	0.791391	24
CG15296-MIP04931(modencode)	0.124603	0.499132	24	4.5	0.421082	0.000130188	0.354222	24
CG15296-RA(modencode)	0.124603	0.499132	24	4.5	0.545957	4.51128e-06	0.0572642	24
CG1663-RA(modencode)	0.124603	0.499132	24	21	0.512087	0.044091	0.79986	24
CG1690-RA(modencode)	0.124603	0.499132	24	12	4.66471	0.00568148	0.67128	24
CG17082.a(modencode)	0.124603	0.499132	24	4.5	5.93708	0.0478586	0.801648	24
CG17082.c(modencode)	0.124603	0.499132	24	4.5	6.10954	0.0399923	0.797544	24
CG17082.d(modencode)	0.124603	0.499132	24	4.5	5.99252	0.0423764	0.798944	24
CG17082.e(modencode)	0.124603	0.499132	24	4.5	6.30407	0.0415458	0.798474	24
CG17082.k(modencode)	0.124603	0.499132	24	4.5	6.11181	0.0396108	0.797305	24
CG17082-RB(modencode)	0.124603	0.499132	24	4.5	5.85032	0.0411691	0.798255	24
CG17082-RE(modencode)	0.124603	0.499132	24	4.5	6.12015	0.039992	0.797544	24
CG17544-RA(modencode)	0.124603	0.499132	24	21	0.819607	0.0267267	0.785403	24
CG3074-RA(modencode)	0.124603	0.499132	24	12	1.87079	0.00158035	0.47059	24
CG3074-RB(modencode)	0.124603	0.499132	24	12	1.65781	0.0014589	0.460091	24
CG31145-RC(modencode)	0.124603	0.499132	24	19.5	0.435224	0.0260108	0.784412	24
CG31534-RA(modencode)	0.124603	0.499132	24	16.5	0.969161	0.0259526	0.784329	12
CG31534-RB(modencode)	0.124603	0.499132	24	16.5	1.05239	0.0248174	0.782639	12
CG31534-RC(modencode)	0.124603	0.499132	24	16.5	1.05712	0.0246348	0.782354	12
CG31534-RD(modencode)	0.124603	0.499132	24	16.5	1.01753	0.0258487	0.78418	12
CG32103.b(modencode)	0.124603	0.499132	24	0	6.94754	0.0470982	0.80131	24
CG32103.c(modencode)	0.124603	0.499132	24	0	8.31353	0.044832	0.800235	24
CG32103.d(modencode)	0.124603	0.499132	24	0	7.06251	0.0460559	0.800828	24
CG32103.e(modencode)	0.124603	0.499132	24	0	6.79763	0.0478311	0.801636	24
CG32103.f(modencode)	0.124603	0.499132	24	0	8.04581	0.0451025	0.800369	24
CG32350-RA(modencode)	0.124603	0.499132	24	6	1.57204	0.0265851	0.785211	24
CG32816.a(modencode)	0.124603	0.499132	24	18	0.016122	0.0321492	0.79153	24
CG32816.b(modencode)	0.124603	0.499132	24	18	0.0154856	0.0336707	0.792908	24
CG32816.c(modencode)	0.124603	0.499132	24	18	0.0156271	0.0271175	0.785922	24
CG32816.d(modencode)	0.124603	0.499132	24	18	0.0156271	0.0285596	0.787723	24
CG32816-RA(modencode)	0.124603	0.499132	24	18	0.0152028	0.0276406	0.786596	24
CG32816-RB(modencode)	0.124603	0.499132	24	18	0.01492	0.0285511	0.787713	24
CG40196-RD(modencode)	0.124603	0.499132	24	6	4.07887	0.0468661	0.801204	24
CG41128-RB(modencode)	0.124603	0.499132	24	6	23.8059	0.0432981	0.799445	24
CG42256-RE(modencode)	0.124603	0.499132	24	16.5	19.2513	0.0407384	0.797999	12
CG42256-RF(modencode)	0.124603	0.499132	24	16.5	19.3347	0.0434123	0.799506	12
CG42533.c(modencode)	0.124603	0.499132	24	18	0	0.047892	0.801663	12
CG42533.d(modencode)	0.124603	0.499132	24	18	1.25607e-15	0.0477639	0.801607	12
CG42533.e(modencode)	0.124603	0.499132	24	18	0	0.04789	0.801662	12
CG42533.g(modencode)	0.124603	0.499132	24	18	0	0.0486013	0.803109	12
CG42533.h(modencode)	0.124603	0.499132	24	18	1.25607e-15	0.0485972	0.8031	12
CG42533.i(modencode)	0.124603	0.499132	24	18	0	0.0487315	0.803384	12
CG5758.a(modencode)	0.124603	0.499132	24	3	105.176	0.0135693	0.751939	24
CG5758.b(modencode)	0.124603	0.499132	24	3	108.275	0.0135673	0.75193	24
CG5758.c(modencode)	0.124603	0.499132	24	3	106.132	0.0148866	0.757742	24
CG5758-RA(modencode)	0.124603	0.499132	24	3	106.466	0.0144359	0.755866	24
CG5758-RB(modencode)	0.124603	0.499132	24	3	99.1593	0.0149123	0.757846	24
CG5758-RC(modencode)	0.124603	0.499132	24	3	108.726	0.0135724	0.751954	24
CG6040.b(modencode)	0.124603	0.499132	24	1.5	0.441129	0.0275195	0.786442	24
CG6040-RA(modencode)	0.124603	0.499132	24	1.5	0.273085	0.0442523	0.799943	24
CG9009-RA(modencode)	0.124603	0.499132	24	0	1.23963	0.0181564	0.768748	24
Chd64.a(modencode)	0.124603	0.499132	24	3	35.9038	0.0366966	0.79532	24
Chd64-RB(modencode)	0.124603	0.499132	24	3	28.6786	0.0378869	0.796166	24
chr2L_1136532_1137444.0(modencode)	0.124603	0.499132	24	12	0.579262	0.0374943	0.795893	24
chrX_9142356_9142574.0(modencode)	0.124603	0.499132	24	9	0.170413	0.0241384	0.781556	24
dia.a(modencode)	0.124603	0.499132	24	21	0.33128	0.0304882	0.789875	24
eIF-4B.b(modencode)	0.124603	0.499132	24	6	6.88984	0.0209366	0.775559	24
eIF-4B.c(modencode)	0.124603	0.499132	24	6	8.9531	0.0279243	0.786952	24
eIF-4B-RD(modencode)	0.124603	0.499132	24	6	6.64072	0.0205142	0.774636	24
fra.a(modencode)	0.124603	0.499132	24	16.5	1.78035	0.0392107	0.797049	24
fra-RA(modencode)	0.124603	0.499132	24	16.5	1.77279	0.0392085	0.797048	24
fra-RB(modencode)	0.124603	0.499132	24	16.5	1.91718	0.0367217	0.795338	24
grh.b(modencode)	0.124603	0.499132	24	6	1.17083	0.0468828	0.801212	12
grh.c(modencode)	0.124603	0.499132	24	6	1.20145	0.0451368	0.800386	12
grh.f(modencode)	0.124603	0.499132	24	6	0.809354	0.0413547	0.798363	12
grh.g(modencode)	0.124603	0.499132	24	6	0.81883	0.0413602	0.798367	12
grh.i(modencode)	0.124603	0.499132	24	6	0.916976	0.0402572	0.797708	12
grh.j(modencode)	0.124603	0.499132	24	6	0.906794	0.0402536	0.797706	12
grh.k(modencode)	0.124603	0.499132	24	6	1.11857	0.0458958	0.800752	12
grh.l(modencode)	0.124603	0.499132	24	6	0.948301	0.0470539	0.80129	12
grh.o(modencode)	0.124603	0.499132	24	6	0.94321	0.0409665	0.798135	12
grh.p(modencode)	0.124603	0.499132	24	6	0.962443	0.0470521	0.801289	12
grh.q(modencode)	0.124603	0.499132	24	6	0.870378	0.0406705	0.797959	12
grh.r(modencode)	0.124603	0.499132	24	6	0.973191	0.0407949	0.798033	12
grh.s(modencode)	0.124603	0.499132	24	6	1.08866	0.0458973	0.800753	12
grh-RH(modencode)	0.124603	0.499132	24	6	1.20194	0.0451332	0.800384	12
grh-RI(modencode)	0.124603	0.499132	24	6	1.1791	0.0450531	0.800344	12
grh-RJ(modencode)	0.124603	0.499132	24	6	0.98896	0.0472891	0.801396	12
grh-RL(modencode)	0.124603	0.499132	24	6	1.03499	0.046287	0.800937	12
lilli.g(modencode)	0.124603	0.499132	24	18	1.18752	0.0305931	0.789985	24
nc_21656.a(modencode)	0.124603	0.499132	24	15	0.475388	0.0220499	0.777831	24
nc_24110.a(modencode)	0.124603	0.499132	24	4.5	2.67407	0.0282016	0.787292	12
nc_2470.a(modencode)	0.124603	0.499132	24	21	2.99424	0.00580689	0.673966	24
PGRP-SD-IP02674(modencode)	0.124603	0.499132	24	6	1.50331	0.0442034	0.799918	24
PGRP-SD-RA(modencode)	0.124603	0.499132	24	6	1.50543	0.0442025	0.799917	24
psnoRNA:pit-a(modencode)	0.124603	0.499132	24	3	12.8995	0.0103716	0.732397	24
Rab7.c(modencode)	0.124603	0.499132	24	6	19.9798	0.0053634	0.664014	24
Rab7.d(modencode)	0.124603	0.499132	24	6	19.0915	0.00538329	0.664488	24
RecQ5-RC(modencode)	0.124603	0.499132	24	21	2.74605	0.0375073	0.795902	24
snoRNA:Me28S-G1083a-RA(modencode)	0.124603	0.499132	24	6	3.79532	0.036793	0.79539	12
SP2353.g(modencode)	0.124603	0.499132	24	16.5	11.5573	0.0274061	0.786297	24
tim.a(modencode)	0.124603	0.499132	24	15	55.5232	0.00110174	0.423787	24
tim.d(modencode)	0.124603	0.499132	24	15	52.1628	0.00109112	0.423679	24
tim.e(modencode)	0.124603	0.499132	24	15	59.7269	0.00117165	0.430205	24
tim-RA(modencode)	0.124603	0.499132	24	15	56.3614	0.00109874	0.423757	24
tim-RD(modencode), tim-RB(modencode)	0.124603	0.499132	24	15	55.0068	0.00109733	0.423743	24
tim-RE(modencode)	0.124603	0.499132	24	15	53.6911	0.00108803	0.423647	24
tim-RF(modencode)	0.124603	0.499132	24	15	52.8955	0.00108803	0.423647	24
tim-RG(modencode)	0.124603	0.499132	24	15	55.2036	0.00109806	0.42375	24
tim-RH(modencode)	0.124603	0.499132	24	15	56.091	0.00109011	0.423668	24
Ugt35b.a(modencode)	0.124603	0.499132	24	6	17.0543	0.00792267	0.708252	24
Ugt35b-RA(modencode)	0.124603	0.499132	24	6	15.5326	0.00783624	0.707163	24
Uhg2-RA(modencode)	0.124603	0.499132	24	6	2.90296	0.0224965	0.778683	24
5-HT2.b(modencode)	0.244048	0.666379	24	16.5	1.38939	0.0284206	0.787557	24
Cdc42.c(modencode)	0.244048	0.666379	24	4.5	7.41995	0.0313466	0.790751	24
CG10249.b(modencode)	0.244048	0.666379	24	3	0.851922	0.02894	0.788169	24
CG10249-RB(modencode)	0.244048	0.666379	24	3	0.886288	0.0266152	0.785252	24
CG10249-RC(modencode)	0.244048	0.666379	24	3	0.698621	0.0302258	0.789598	24
CG10249-RD(modencode)	0.244048	0.666379	24	3	0.635406	0.0323538	0.791722	24
CG10249-RE(modencode)	0.244048	0.666379	24	3	0.885086	0.0259953	0.78439	24
CG11407-RA(modencode)	0.244048	0.666379	24	10.5	16.9286	0.00560457	0.669585	24
CG17386-RA(modencode)	0.244048	0.666379	24	0	10.0539	0.00178479	0.485846	24
CG3262-RC(modencode)	0.244048	0.666379	24	1.5	2.41802	0.00794123	0.708483	24
CG3262-RD(modencode)	0.244048	0.666379	24	1.5	2.38557	0.00794175	0.708489	24
CG34398.a(modencode)	0.244048	0.666379	24	12	0.453114	0.0473067	0.801404	24
CG34398-RD(modencode)	0.244048	0.666379	24	12	0.418254	0.0495035	0.80499	24
CG42256-RM(modencode)	0.244048	0.666379	24	16.5	11.3744	0.0499256	0.805849	12
CG42324.c(modencode)	0.244048	0.666379	24	16.5	1.79428	0.0450611	0.800348	12
CG4933-RA(modencode)	0.244048	0.666379	24	3	7.08337	0.0467588	0.801155	24
CG5059.c(modencode)	0.244048	0.666379	24	10.5	9.38882	0.024947	0.782839	24
CG7768-RA(modencode)	0.244048	0.666379	24	9	2.41427	0.0349253	0.793957	24
CG7768-RB(modencode)	0.244048	0.666379	24	10.5	1.5789	0.0147433	0.757157	24
CG9009-MIP13254(modencode)	0.244048	0.666379	24	10.5	1.2385	0.0191807	0.771473	24
CG9243.a(modencode)	0.244048	0.666379	24	3	0.382969	0.0300389	0.789398	24
CG9243-RB(modencode)	0.244048	0.666379	24	3	0.5164	0.0428481	0.799203	24
chr2L_2389605_2390708.0(modencode)	0.244048	0.666379	24	4.5	0.573676	0.0165435	0.763824	24
Clk.a(modencode)	0.244048	0.666379	24	3	4.41822	0.000796752	0.419561	24
Clk.b(modencode)	0.244048	0.666379	24	3	4.40598	0.000796679	0.41956	24
Clk-RA(modencode)	0.244048	0.666379	24	3	4.55653	0.000847462	0.420467	12
Clk-RD(modencode)	0.244048	0.666379	24	3	4.54175	0.000847503	0.420468	12
dia.b(modencode)	0.244048	0.666379	24	21	0.323996	0.0347861	0.793844	24
dia.c(modencode)	0.244048	0.666379	24	21	0.318057	0.0375045	0.7959	24
dia-RA(modencode)	0.244048	0.666379	24	21	0.338563	0.0347965	0.793852	24
dia-RB(modencode)	0.244048	0.666379	24	21	0.333118	0.0375225	0.795913	24
kel-RA(modencode)	0.244048	0.666379	24	4.5	58.9931	0.0263977	0.784954	24
lilli.a(modencode)	0.244048	0.666379	24	18	0.770039	0.0255668	0.783771	12
lilli-RG(modencode)	0.244048	0.666379	24	16.5	0.905167	0.00269734	0.557472	12
Lnk.c(modencode)	0.244048	0.666379	24	18	0.136825	0.0253479	0.783447	12
Lnk-RC(modencode)	0.244048	0.666379	24	18	0	0.00291951	0.57151	12
nc_2470.b(modencode)	0.244048	0.666379	24	21	4.67836	0.0218768	0.777492	24
nc_6835.b(modencode)	0.244048	0.666379	24	4.5	9.18772	0.00448511	0.639789	24
Nhe2.ag(modencode)	0.244048	0.666379	24	16.5	15.4477	0.0228763	0.779382	24
Nhe2.ah(modencode)	0.244048	0.666379	24	16.5	22.489	0.0225782	0.778835	24
Nhe2.ai(modencode)	0.244048	0.666379	24	16.5	24.7697	0.0219868	0.777708	24
Nhe2.aj(modencode)	0.244048	0.666379	24	16.5	23.5837	0.022103	0.777934	24
Nhe2.ak(modencode)	0.244048	0.666379	24	16.5	22.1124	0.0230305	0.77966	24
Nhe2.al(modencode)	0.244048	0.666379	24	16.5	14.5248	0.0251294	0.783118	24
Nhe2.am(modencode)	0.244048	0.666379	24	16.5	14.1185	0.0272999	0.78616	24
Nhe2.an(modencode)	0.244048	0.666379	24	16.5	13.8761	0.0245148	0.782164	24
Nhe2.ao(modencode)	0.244048	0.666379	24	16.5	14.8263	0.0252822	0.783349	24
Nhe2.ap(modencode)	0.244048	0.666379	24	16.5	13.5868	0.0249686	0.782873	24
Nhe2.aq(modencode)	0.244048	0.666379	24	16.5	13.5911	0.0248646	0.782712	24
Nhe2.ar(modencode)	0.244048	0.666379	24	16.5	14.7541	0.0258487	0.78418	24
Nhe2.as(modencode)	0.244048	0.666379	24	16.5	14.7469	0.0259322	0.7843	24
Nhe2.at(modencode)	0.244048	0.666379	24	16.5	13.9456	0.0269089	0.785647	24
Nhe2.q(modencode)	0.244048	0.666379	24	16.5	13.7378	0.0245286	0.782185	24
Nhe2.t(modencode)	0.244048	0.666379	24	16.5	15.0926	0.0246835	0.78243	24
Nhe2.v(modencode)	0.244048	0.666379	24	16.5	16.629	0.0255048	0.783679	24
Nhe2.w(modencode)	0.244048	0.666379	24	16.5	15.7514	0.0253509	0.783451	24
noncoding_19262-MIP13990(modencode)	0.244048	0.666379	24	4.5	1.17281	0.0431734	0.799379	24
Sap47.a(modencode)	0.244048	0.666379	24	16.5	230.919	0.000625584	0.415466	12
Sap47.b(modencode)	0.244048	0.666379	24	16.5	229.258	0.00062691	0.415506	12
Sap47.c(modencode)	0.244048	0.666379	24	16.5	245.121	0.000615714	0.415163	12
Sap47.d(modencode)	0.244048	0.666379	24	16.5	239.011	0.000615567	0.415159	12
Sap47.e(modencode)	0.244048	0.666379	24	16.5	214.016	0.000630091	0.415601	12
Sap47.h(modencode)	0.244048	0.666379	24	16.5	192.717	0.00194842	0.49629	12
Sap47.i(modencode)	0.244048	0.666379	24	16.5	191.576	0.00195195	0.496501	12
Sap47.j(modencode)	0.244048	0.666379	24	16.5	202.327	0.00191662	0.494366	12
Sap47.k(modencode)	0.244048	0.666379	24	16.5	198.211	0.00191749	0.49442	12
Sap47.l(modencode)	0.244048	0.666379	24	16.5	180.961	0.00195687	0.496793	12
CG14661-RA(modencode)	0.434722	0.888794	24	10.5	2.0207	0.00420359	0.630383	24
CG17211.a(modencode)	0.434722	0.888794	24	10.5	0.294156	0.0249561	0.782853	24
CG17211-RA(modencode)	0.434722	0.888794	24	10.5	0.304904	0.0237615	0.78093	24
CG31300-RA(modencode)	0.434722	0.888794	24	10.5	3.31371	0.00172552	0.4817	24
CG34398-MIP15804(modencode)	0.434722	0.888794	24	13.5	0.0304056	0.00853967	0.715469	24
CG6398.a(modencode)	0.434722	0.888794	24	4.5	1.11581	0.0362399	0.794981	12
CG6398.b(modencode)	0.434722	0.888794	24	4.5	1.11391	0.0357657	0.79462	12
CG6398-RA(modencode)	0.434722	0.888794	24	4.5	0.96414	0.0319108	0.791303	12
CG6486.a(modencode)	0.434722	0.888794	24	4.5	0.494621	0.0180248	0.768377	12
CG6486-RA(modencode)	0.434722	0.888794	24	4.5	0.556705	0.0180188	0.76836	12
CG8436.a(modencode)	0.434722	0.888794	24	4.5	0.608395	0.00572022	0.67212	24
CG8436-RA(modencode)	0.434722	0.888794	24	4.5	0.600192	0.00571715	0.672054	24
chr3L_13796050_13796564.0(modencode)	0.434722	0.888794	24	21	0	0.0379689	0.796223	24
Cpr72Ec-RA(modencode)	0.434722	0.888794	24	4.5	3.54777	0.017471	0.766759	24
dlp.a(modencode)	0.434722	0.888794	24	10.5	4.35641	0.0118457	0.742588	12
dlp-RA(modencode)	0.434722	0.888794	24	10.5	4.23097	0.0118452	0.742584	12
dlp-RB(modencode)	0.434722	0.888794	24	10.5	3.84016	0.0116125	0.741131	12
lilli-RA(modencode)	0.434722	0.888794	24	16.5	2.11545	0.00367677	0.609915	12
lilli-RB(modencode)	0.434722	0.888794	24	16.5	2.12401	0.00297438	0.574752	12
Mob4.b(modencode)	0.434722	0.888794	24	4.5	6.47172	0.0294358	0.788734	24
Mob4-RA(modencode)	0.434722	0.888794	24	4.5	5.9129	0.0289793	0.788215	24
nc_375.a(modencode)	0.434722	0.888794	24	18	0.172181	0.0456704	0.800645	12
nc_6835.a(modencode), Uhg5-RC(modencode)	0.434722	0.888794	24	4.5	10.7883	0.000698683	0.41745	24
Nhe2.x(modencode)	0.434722	0.888794	24	16.5	16.0422	0.0246584	0.782391	24
pio.d(modencode)	0.434722	0.888794	24	10.5	0.631164	0.00773748	0.705893	12
CG17352-RE(modencode)	0.715476	1	24	10.5	1.11801	0.0266061	0.785239	12
CG5059.a(modencode)	0.715476	1	24	10.5	12.6437	0.0445163	0.800077	24
CG5059.b(modencode)	0.715476	1	24	10.5	9.62005	0.0416087	0.79851	24
CG5059-RA(modencode)	0.715476	1	24	10.5	9.60435	0.0416085	0.79851	24
CG5059-RD(modencode)	0.715476	1	24	10.5	10.8407	0.0428416	0.7992	24
InR.g(modencode)	0.715476	1	24	10.5	2.82821	0.0188243	0.770556	12
InR.h(modencode)	0.715476	1	24	10.5	2.90755	0.0198313	0.773066	12
jbug.d(modencode)	0.715476	1	24	1.5	0.449826	0.0248208	0.782644	24
jbug.e(modencode)	0.715476	1	24	0	0.693742	0.00810879	0.710529	12
jbug-RL(modencode)	0.715476	1	24	0	0.619779	0.0159185	0.761668	12
Pdh.b(modencode), Pdh-RB(modencode), Pdh-RD(modencode)	0.715476	1	24	4.5	23.4576	0.0473256	0.801412	12
Pdh-RA(modencode), Pdh-RC(modencode), Pdh.a(modencode)	0.715476	1	24	4.5	20.467	0.0474788	0.801481	12
pio.b(modencode)	0.715476	1	24	10.5	0.673731	0.00965151	0.726419	12
pio.c(modencode)	0.715476	1	24	10.5	0.633002	0.00975282	0.727307	12
Aats-arg.a(modencode)	1	1	24	10.5	0.00576292	0.0237501	0.780911	16
Aats-arg-RA(modencode)	1	1	24	10.5	0	0.0239425	0.781233	16
Axn.a(modencode)	1	1	24	13.5	0	0.0369833	0.795528	12
Axn.d(modencode)	1	1	24	13.5	0	0.0352795	0.79424	12
Cam.a(modencode)	1	1	24	16.5	124.805	0.0131432	0.749836	16
Cam.b(modencode)	1	1	24	16.5	121.863	0.0131189	0.749712	16
Cam.c(modencode)	1	1	24	16.5	102.179	0.0133299	0.750772	16
Cam.d(modencode)	1	1	24	16.5	74.3966	0.0124349	0.746049	16
Cam.e(modencode)	1	1	24	16.5	85.6054	0.00755854	0.70352	16
Cam.f(modencode)	1	1	24	16.5	39.1836	0.0398011	0.797425	16
Cam.g(modencode)	1	1	24	16.5	31.8954	0.0279461	0.786979	16
Cam.h(modencode)	1	1	24	16.5	42.4706	0.0365259	0.795194	16
Cam.i(modencode)	1	1	24	16.5	82.7104	0.0127087	0.747558	16
Cam.j(modencode)	1	1	24	16.5	67.6091	0.00716837	0.697997	16
Cam-RA(modencode)	1	1	24	16.5	122.941	0.0129053	0.748606	16
Cam-RB(modencode)	1	1	24	16.5	106.776	0.00733137	0.700365	16
CG10089-RA(modencode)	1	1	24	10.5	0	0.0405623	0.797894	12
CG10089-RB(modencode)	1	1	24	10.5	0	0.0427926	0.799173	48
CG10089-RC(modencode)	1	1	24	10.5	0	0.045994	0.800799	48
CG10107-RB(modencode)	1	1	24	13.5	0.0760847	0.0342774	0.793424	48
CG10478.a(modencode)	1	1	24	7.5	0	0.0352175	0.794191	12
CG10562-RA(modencode)	1	1	24	7.5	0.112182	0.0272269	0.786065	12
CG1109-RB(modencode)	1	1	24	13.5	0	0.024216	0.781683	12
CG1116.a(modencode)	1	1	24	13.5	0.0499571	0.0117023	0.741698	12
CG1116-RA(modencode)	1	1	24	13.5	0.0500278	0.0117123	0.741761	12
CG1116-RB(modencode)	1	1	24	13.5	0.0484015	0.0117098	0.741745	12
CG11796-RA(modencode)	1	1	24	4.5	6.28037e-16	0.0242264	0.7817	12
CG11796-RB(modencode)	1	1	24	10.5	0	0.0390495	0.796945	12
CG11802-RA(modencode)	1	1	24	16.5	7.85046e-17	0.0179635	0.768203	16
CG11910-RA(modencode)	1	1	24	7.5	0	0.0424657	0.798994	12
CG12269.a(modencode)	1	1	24	10.5	0	0.0441229	0.799877	48
CG12269.b(modencode)	1	1	24	10.5	0	0.0438256	0.799723	48
CG12269-RA(modencode)	1	1	24	10.5	0	0.0402878	0.797727	48
CG12581.a(modencode)	1	1	24	13.5	0.0287085	0.0123277	0.745441	12
CG12581.d(modencode)	1	1	24	7.5	0.0745998	0.0490441	0.804039	12
CG12581.e(modencode)	1	1	24	7.5	0.079196	0.0192731	0.771705	12
CG12581.f(modencode)	1	1	24	7.5	0.0733977	0.0490613	0.804075	12
CG12581.i(modencode)	1	1	24	13.5	0	0.0197496	0.772871	12
CG12581-RA(modencode)	1	1	24	13.5	0.0277893	0.0123336	0.745475	12
CG12581-RB(modencode)	1	1	24	13.5	0.028355	0.0123253	0.745428	12
CG12858.a(modencode)	1	1	24	13.5	6.63956	0.0389495	0.79688	16
CG12858.b(modencode)	1	1	24	13.5	6.23739	0.0394594	0.797209	16
CG12858-RA(modencode)	1	1	24	4.5	5.0243e-15	0.0435875	0.799598	16
CG13185.a(modencode)	1	1	24	10.5	0	0.0334556	0.79272	12
CG13185-RB(modencode)	1	1	24	10.5	0	0.0338327	0.793047	12
CG13185-RC(modencode)	1	1	24	10.5	0	0.0334515	0.792717	12
CG13282-RA(modencode)	1	1	24	10.5	0.0121622	0.0224551	0.778605	12
CG13284.c(modencode)	1	1	24	13.5	0.314274	0.0419843	0.798725	16
CG13994.a(modencode)	1	1	24	16.5	0	0.0201891	0.773901	16
CG13994-RA(modencode)	1	1	24	16.5	0	0.0201925	0.773909	16
CG14322-MIP21019(modencode)	1	1	24	13.5	0	0.00186779	0.491317	12
CG14619.b(modencode)	1	1	24	13.5	0.292141	0.0129519	0.74885	16
CG14619.g(modencode)	1	1	24	10.5	0.47514	0.0169893	0.765272	16
CG14619.j(modencode)	1	1	24	10.5	0.493454	0.0166954	0.764325	16
CG14619.n(modencode)	1	1	24	10.5	0.49501	0.0166947	0.764323	16
CG14619.p(modencode)	1	1	24	10.5	0.493879	0.0166955	0.764326	16
CG15522-RA(modencode)	1	1	24	10.5	0	0.0484118	0.802706	48
CG15709.a(modencode)	1	1	24	13.5	0	0.0108049	0.73565	12
CG15864.a(modencode)	1	1	24	7.5	0.175186	0.0129122	0.748642	48
CG15864-RB(modencode)	1	1	24	7.5	0.171721	0.0129189	0.748677	48
CG1703-RA(modencode)	1	1	24	10.5	6.66134e-16	0.0193293	0.771846	12
CG18343-RA(modencode)	1	1	24	13.5	0	0.00230256	0.528238	16
CG18343-TA01006(modencode)	1	1	24	13.5	0	0.00230294	0.528269	16
CG18467.b(modencode)	1	1	24	4.5	0	0.0474782	0.80148	24
CG18467.c(modencode)	1	1	24	4.5	0	0.0474957	0.801488	24
CG3009.a(modencode)	1	1	24	16.5	0.0188444	0.0409661	0.798135	12
CG3009-RA(modencode)	1	1	24	16.5	0.00742462	0.0386093	0.796655	12
CG3104.c(modencode)	1	1	24	10.5	0	0.0414148	0.798398	24
CG31627-RB(modencode)	1	1	24	16.5	0.239144	0.0203211	0.774202	16
CG32756-RA(modencode)	1	1	24	4.5	0.473231	0.0387122	0.796724	12
CG33322-RA(modencode)	1	1	24	13.5	0	0.0198193	0.773037	48
CG33476-RA(modencode)	1	1	24	10.5	0	0.00217509	0.517374	12
CG34030-RA(modencode)	1	1	24	7.5	0	0.0350081	0.794023	12
CG34233-RA(modencode)	1	1	24	7.5	0.0627557	0.016176	0.762575	12
CG42402-MIP03045(modencode)	1	1	24	13.5	0	0.0350838	0.794084	12
CG42463-RB(modencode)	1	1	24	7.5	0.0235467	0.0488323	0.803596	12
CG4747.f(modencode)	1	1	24	13.5	0.638235	0.0175693	0.767053	16
CG4747.g(modencode)	1	1	24	13.5	0.638836	0.0175724	0.767063	16
CG4747.h(modencode)	1	1	24	13.5	0.625683	0.00689483	0.693811	16
CG4747.i(modencode)	1	1	24	13.5	0.656372	0.0175224	0.766913	16
CG4747.l(modencode)	1	1	24	13.5	0.594712	0.0199585	0.773366	16
CG4747.m(modencode)	1	1	24	13.5	0.595207	0.0199641	0.773379	16
CG5056-RA(modencode)	1	1	24	10.5	0.068059	0.0062722	0.683153	48
CG5850.b(modencode)	1	1	24	13.5	0	0.0308885	0.79029	12
CG5850.c(modencode)	1	1	24	13.5	0	0.0309078	0.790309	12
CG6412-RA(modencode)	1	1	24	13.5	0.110167	0.0114114	0.739831	48
CG7414.a(modencode)	1	1	24	7.5	0.0405526	0.0366069	0.795254	16
CG7414-RA(modencode)	1	1	24	7.5	0.0344715	0.0348511	0.793897	16
CG7414-RB(modencode)	1	1	24	7.5	0.0398101	0.036437	0.795128	16
CG7611.a(modencode)	1	1	24	10.5	0.078701	0.0298838	0.789229	48
CG7611.b(modencode)	1	1	24	10.5	0.0516188	0.0357094	0.794576	48
CG7611.c(modencode)	1	1	24	10.5	0.00714178	0.033751	0.792977	48
CG7611.d(modencode)	1	1	24	10.5	0.00707107	0.0336334	0.792875	48
CG7611.e(modencode)	1	1	24	10.5	0.0318552	0.034219	0.793375	48
CG7611.f(modencode)	1	1	24	10.5	0.0468105	0.0346855	0.793762	48
CG7611.g(modencode)	1	1	24	10.5	0.0804334	0.0332076	0.792501	48
CG7611.h(modencode)	1	1	24	10.5	0	0.0373281	0.795775	48
CG7611.i(modencode)	1	1	24	10.5	0.0116673	0.0342709	0.793419	48
CG7611.j(modencode)	1	1	24	10.5	0.00707107	0.0337481	0.792975	48
CG7611.k(modencode)	1	1	24	10.5	0.0513713	0.0357091	0.794576	48
CG7611.l(modencode)	1	1	24	10.5	0.0782767	0.0298822	0.789228	48
CG7611.m(modencode)	1	1	24	10.5	0.0308652	0.0345837	0.793678	48
CG7611-RA(modencode)	1	1	24	10.5	0.0523259	0.0357283	0.794591	48
CG7611-RB(modencode)	1	1	24	10.5	1.22125e-15	0.0367566	0.795364	48
CG7611-RC(modencode)	1	1	24	10.5	0.0311834	0.0345816	0.793677	48
CG7611-RD(modencode)	1	1	24	10.5	0	0.0364272	0.795121	48
CG7611-RE(modencode)	1	1	24	10.5	0.00512652	0.0340804	0.793258	48
CG7611-RG(modencode)	1	1	24	10.5	0	0.0357549	0.794611	48
CG7611-RH(modencode)	1	1	24	10.5	0	0.0333287	0.792609	48
CG7611-RI(modencode)	1	1	24	10.5	6.66134e-16	0.0449786	0.800308	48
CG7611-RJ(modencode)	1	1	24	10.5	0.0400576	0.0353541	0.794299	48
CG7656.a(modencode)	1	1	24	7.5	0.0320319	0.0182089	0.768895	48
CG7656.c(modencode)	1	1	24	10.5	0.572933	0.0389052	0.796851	48
CG7656.d(modencode)	1	1	24	10.5	0.571166	0.0389061	0.796851	48
CG7656.f(modencode), CG7656.e(modencode)	1	1	24	10.5	0.677974	0.0234021	0.780315	48
CG7656.g(modencode), CG7656.h(modencode)	1	1	24	13.5	1.18773	0.0464793	0.801026	48
CG7656-LD40324(modencode)	1	1	24	7.5	0.0606698	0.0199585	0.773366	48
CG7656-RA(modencode)	1	1	24	10.5	0.636325	0.0331068	0.792411	48
CG7656-RE(modencode)	1	1	24	10.5	0.630951	0.0331111	0.792415	48
CG7843-LD27090(modencode)	1	1	24	13.5	1.48224	0.0435961	0.799603	16
CG8026-MIP14680(modencode)	1	1	24	13.5	0.126254	0.0435678	0.799588	16
CG8097.a(modencode)	1	1	24	7.5	0	0.0228538	0.779341	48
CG8097-RA(modencode)	1	1	24	7.5	0	0.0421872	0.798839	48
CG8419-RA(modencode)	1	1	24	10.5	0.203682	0.0063396	0.684391	12
CG8974-RA(modencode)	1	1	24	13.5	0.559569	0.0416142	0.798514	16
CG8974-RB(modencode)	1	1	24	13.5	0.593227	0.0354735	0.794393	16
CG8974-RC(modencode)	1	1	24	13.5	0.483237	0.036504	0.795178	16
CG8974-RD(modencode)	1	1	24	13.5	0.51884	0.0365838	0.795237	16
CG8974-RE(modencode)	1	1	24	13.5	0.558367	0.0352961	0.794253	16
CG9317-RB(modencode)	1	1	24	13.5	0.139866	0.0383433	0.796477	12
CG9548-RA(modencode)	1	1	24	10.5	0.0795495	0.0448167	0.800227	12
chr2L_16628843_16629150.0(modencode)	1	1	24	13.5	0	0.045128	0.800381	16
chr2L_2391513_2392180.0(modencode)	1	1	24	4.5	0	0.0293224	0.788607	48
chr2L_9721046_9721343.0(modencode)	1	1	24	13.5	0	0.0344832	0.793595	48
chr3L_10325582_10326440.0(modencode)	1	1	24	13.5	0.016016	0.000125218	0.351624	12
CLIP-190.t(modencode)	1	1	24	13.5	0.365397	0.0336001	0.792846	12
CLIP-190-RO(modencode)	1	1	24	13.5	0.373671	0.0477555	0.801603	12
Cng-RA(modencode)	1	1	24	10.5	0.000989949	0.0237761	0.780955	12
CoRest.b(modencode)	1	1	24	13.5	0.0276125	0.0379663	0.796221	12
CoRest-RA(modencode)	1	1	24	13.5	0	0.00939599	0.724104	12
CoRest-RC(modencode)	1	1	24	13.5	0	0.0131216	0.749726	12
CoRest-RD(modencode)	1	1	24	13.5	0	0.0125519	0.746701	12
Csp-RA(modencode)	1	1	24	13.5	0.0805395	0.0485795	0.803063	16
Eb1.a(modencode)	1	1	24	7.5	0	0.022751	0.779154	12
Eb1.b(modencode)	1	1	24	7.5	0	0.0223945	0.778491	12
Eb1.c(modencode)	1	1	24	7.5	0	0.0225539	0.77879	12
Eb1.d(modencode)	1	1	24	7.5	0	0.0231893	0.779942	12
Eb1.e(modencode)	1	1	24	4.5	1.25607e-15	0.027475	0.786386	12
Eb1.f(modencode)	1	1	24	7.5	0	0.0227524	0.779156	12
Eb1.g(modencode)	1	1	24	7.5	0	0.0237075	0.780839	12
Eb1.h(modencode)	1	1	24	7.5	0	0.0223949	0.778491	12
Eb1.i(modencode)	1	1	24	7.5	0	0.0225538	0.778789	12
Eb1-MIP21692(modencode)	1	1	24	7.5	0	0.011741	0.74194	12
Eb1-RA(modencode)	1	1	24	4.5	1.25607e-15	0.00651847	0.687572	12
Eb1-RB(modencode)	1	1	24	7.5	0	0.0109529	0.736708	12
Eb1-RD(modencode)	1	1	24	7.5	0	0.0222004	0.778121	12
Eb1-RE(modencode)	1	1	24	7.5	0	0.010953	0.736709	12
Eb1-RF(modencode)	1	1	24	7.5	0	0.00820777	0.711703	12
edl-RA(modencode)	1	1	24	4.5	0	0.0118291	0.742486	12
Fas1.a(modencode)	1	1	24	13.5	39.6195	0.0129157	0.74866	12
Fas1.b(modencode)	1	1	24	13.5	43.4836	0.0128256	0.748184	12
Fas1.c(modencode)	1	1	24	13.5	39.9631	0.0130831	0.749529	12
Fas1.d(modencode)	1	1	24	13.5	39.2842	0.0127844	0.747965	12
Fas1.e(modencode)	1	1	24	13.5	4.67956	0.0246809	0.782426	12
Fas1.f(modencode)	1	1	24	13.5	4.69904	0.0246411	0.782363	12
Fas1.g(modencode)	1	1	24	13.5	0	0.0361025	0.794877	12
Fas1.i(modencode)	1	1	24	13.5	3.96142	0.0268975	0.785632	12
Fas1.k(modencode)	1	1	24	13.5	4.68052	0.0246809	0.782426	12
Fas1-RE(modencode)	1	1	24	13.5	39.7568	0.0130841	0.749534	12
Fas1-RF(modencode)	1	1	24	13.5	39.4195	0.0129509	0.748844	12
Gasp.a(modencode)	1	1	24	7.5	0.362993	0.0343888	0.793517	12
Gasp.b(modencode)	1	1	24	7.5	1.15966	0.0219773	0.777689	12
Gasp.c(modencode), Gasp-RA(modencode)	1	1	24	7.5	0.459443	0.0346989	0.793773	12
Gasp-RB(modencode)	1	1	24	7.5	1.45668	0.019516	0.772306	12
Ggamma1.a(modencode)	1	1	24	7.5	0	0.0358216	0.794663	16
Ggamma1.b(modencode)	1	1	24	7.5	0	0.0397792	0.797411	16
Ggamma1.c(modencode)	1	1	24	7.5	0	0.0397702	0.797406	16
Ggamma1.d(modencode)	1	1	24	7.5	0	0.0358137	0.794657	16
Ggamma1.e(modencode)	1	1	24	7.5	0	0.0366517	0.795287	16
Ggamma1.f(modencode)	1	1	24	7.5	0	0.0366517	0.795287	16
Ggamma1.g(modencode)	1	1	24	7.5	0	0.0199573	0.773363	16
Ggamma1.h(modencode)	1	1	24	7.5	0	0.0201057	0.773709	16
Ggamma1.i(modencode)	1	1	24	7.5	0	0.0164678	0.763571	16
Ggamma1.j(modencode)	1	1	24	7.5	0	0.0203705	0.774314	16
Ggamma1.k(modencode)	1	1	24	7.5	0	0.0150508	0.7584	16
Ggamma1-RC(modencode)	1	1	24	7.5	0	0.0150454	0.758379	16
Ggamma1-RD(modencode)	1	1	24	7.5	0	0.0383053	0.796452	16
Ggamma1-RE(modencode)	1	1	24	7.5	0	0.0435784	0.799594	16
hubl-FI11533(modencode)	1	1	24	7.5	0.15468	0.0378505	0.796141	12
Ilp3.a(modencode)	1	1	24	4.5	2.78812	0.0267392	0.785419	16
Ilp3-IP05494(modencode)	1	1	24	4.5	4.67755	0.0261402	0.784595	16
Ilp3-RA(modencode)	1	1	24	4.5	3.54151	0.0268152	0.785522	16
l(1)G0156.a_l(1)G0156.a(modencode)	1	1	24	13.5	0.0399869	0.0342651	0.793414	12
l(1)G0156.b_l(1)G0156.b(modencode)	1	1	24	13.5	0.0380423	0.036405	0.795104	12
l(2)37Cd-RA_l(2)37Cd-RA(modencode)	1	1	24	16.5	0	0.00627458	0.683197	16
LD10495(modencode)	1	1	24	13.5	0.039598	0.0323645	0.791732	12
mael.a(modencode)	1	1	24	13.5	0	0.0358786	0.794706	48
mael.b(modencode)	1	1	24	13.5	0	0.0344849	0.793597	48
mael.c(modencode)	1	1	24	13.5	0	0.0345213	0.793627	48
mael.e(modencode)	1	1	24	13.5	0	0.030912	0.790314	48
mael-RA(modencode)	1	1	24	13.5	0	0.0344978	0.793607	48
mael-RC(modencode)	1	1	24	13.5	0	0.034515	0.793622	48
Mdh.b(modencode)	1	1	24	13.5	3.50951	0.0269875	0.785751	12
Mdh-RA(modencode)	1	1	24	13.5	3.26736	0.0273701	0.786251	12
nc_14314.a(modencode)	1	1	24	7.5	0.255831	0.0267913	0.78549	12
nc_1625.a(modencode)	1	1	24	13.5	0.530259	0.0463824	0.800981	12
nc_20813.d(modencode)	1	1	24	4.5	0	0.0192818	0.771727	12
nc_21279.a(modencode)	1	1	24	13.5	0	0.00929478	0.723156	12
nc_25169.a(modencode)	1	1	24	16.5	0	0.0468078	0.801178	12
nc_3727.a(modencode)	1	1	24	13.5	0.0853478	0.0171918	0.765907	12
nc_4393.a(modencode)	1	1	24	10.5	0	0.0368444	0.795428	48
nc_881.a(modencode)	1	1	24	7.5	0.264529	0.0303361	0.789715	12
Nop60B.a(modencode)	1	1	24	4.5	0.43328	0.022665	0.778996	12
Nop60B.b(modencode)	1	1	24	4.5	0.411572	0.0222861	0.778285	12
Nop60B.c(modencode)	1	1	24	4.5	0.379646	0.0234405	0.780381	12
Nop60B.d(modencode)	1	1	24	4.5	0.303526	0.0217557	0.777252	12
not-RB(modencode)	1	1	24	10.5	0	0.00184816	0.490056	12
Nup44A.b(modencode)	1	1	24	16.5	0	0.0212215	0.776162	16
Plip.a(modencode)	1	1	24	13.5	0.316501	0.0239299	0.781212	16
Plip.b(modencode)	1	1	24	13.5	0.295889	0.031475	0.790879	16
Plip-RA(modencode)	1	1	24	13.5	0.292177	0.0314802	0.790884	16
Plip-RB(modencode)	1	1	24	13.5	0.273862	0.0263485	0.784885	16
scramb2-RA(modencode)	1	1	24	13.5	0.925603	0.0088115	0.718369	12
scra-RA(modencode)	1	1	24	16.5	0.0522905	0.0363845	0.795089	48
scra-RB(modencode)	1	1	24	16.5	0.051336	0.0363697	0.795078	48
Shal.c(modencode)	1	1	24	10.5	0	0.00658679	0.688749	16
Shal.d(modencode)	1	1	24	10.5	0	0.00661157	0.689171	16
Shal.g(modencode)	1	1	24	10.5	0.0194808	0.00562927	0.670134	16
SmD3.a(modencode)	1	1	24	7.5	0.301227	0.037759	0.796078	16
Socs16D.a(modencode)	1	1	24	13.5	0	0.0458833	0.800746	16
star1-RA(modencode)	1	1	24	4.5	0	0.00539836	0.664846	12
Su(Tpl)-RA_Su(Tpl)-RA(modencode)	1	1	24	13.5	0	0.0474026	0.801447	12
vir-1-RA(modencode)	1	1	24	10.5	1.27676e-15	0.00898804	0.72017	16
vir-1-RB(modencode)	1	1	24	10.5	0	0.00853002	0.715363	16
Vkor.b(modencode)	1	1	24	10.5	0	0.0427508	0.79915	16
Vkor-RA(modencode)	1	1	24	10.5	0	0.0294583	0.788759	16
wol.a(modencode)	1	1	24	13.5	0	0.0077727	0.706349	16
wol-RA(modencode)	1	1	24	13.5	0	0.00756986	0.703673	16
xmas-2-RA(modencode)	1	1	24	10.5	0.105147	0.0290141	0.788255	16
zfh2-IP22195(modencode)	1	1	24	13.5	0.0691197	0.0326085	0.791959	16
