# Supplementary material for: Deep sequencing the circadian and diurnal transcriptome ofDrosophilabrain
Source: HighWire-hosted journal article supplement (doi:10.1101/gr.128876.111), 2012-04-03
Supplement: Table_S8.xlsx [file Table_S8.xlsx]

## Sheet: Sheet1
name	JTK_WT_BHQ	JTK_WT_ADJP	JTK_WT_PER	JTK_WT_LAG	JTK_WT_AMP	CS_FG_p-value	CS_FG_q_value	CS_FG_period-length
SH3PX1.a(modencode)	0.251755	3.19164e-05	24	12	0.705975	0.009434	0.555105	24
CG1316.a(modencode)	0.251755	9.8054e-05	24	10	5.85421	0.0014263	0.498275	24
CG1316-RA(modencode)	0.251755	9.8054e-05	24	10	5.20968	0.00130112	0.498275	24
CG14715-RH52642(modencode)	0.251755	9.8054e-05	24	20	0.518451	0.0810772	0.672888	24
corto-RA(modencode)	0.251755	9.8054e-05	24	12	9.46059	0.00986175	0.559016	24
Cyp313a1.a(modencode)	1	1	24	11	0.409533	0.000112201	0.498275	48
Cyp313a1-RA(modencode)	1	1	24	11	0.403782	0.000142381	0.498275	48
CG8234-RB(modencode)	0.31474	0.00144015	24	18	2.78862	0.000230124	0.498275	24
CG12414.a(modencode)	1	1	24	11	0	0.000241795	0.498275	48
Smg1-RA(modencode)	1	0.186301	24	1	0.171191	0.277689	0.787267	24
Aef1.a(modencode)	0.251755	0.000264776	24	10	7.96874	0.0197129	0.615414	24
Aef1.b(modencode)	0.251755	0.000264776	24	10	6.69333	0.021417	0.620796	24
Aef1.c(modencode)	0.251755	0.000264776	24	10	5.05709	0.0231365	0.625499	24
Aef1.d(modencode)	0.251755	0.000264776	24	10	5.72339	0.0204637	0.617884	24
Aef1.e(modencode)	0.251755	0.000264776	24	10	5.23846	0.0231368	0.6255	24
Aef1-RA(modencode)	0.251755	0.000264776	24	10	5.93058	0.0207156	0.618677	24
Aef1-RB(modencode)	0.251755	0.000264776	24	10	6.81517	0.0180651	0.609357	24
Aef1-RC(modencode)	0.251755	0.000264776	24	10	6.25422	0.0205304	0.618096	24
CG17646-RA(modencode)	0.251755	0.000264776	24	6	2.57076	0.00209105	0.498275	24
CG30497.d(modencode)	0.251755	0.000264776	24	8	18.6302	0.0738203	0.66883	24
CG8234-AT19440(modencode)	0.251755	0.000264776	24	18	2.27964	0.000360951	0.498275	24
CG8234-RA(modencode)	0.251755	0.000264776	24	18	2.294	0.000284846	0.498275	24
nc_20505.a(modencode)	0.251755	0.000264776	24	6	25.2755	0.0113342	0.570534	24
CG8260.a(modencode)	1	1	24	15	0.0314427	0.942214	0.883394	12
CG5853.a(modencode)	0.569132	0.0108197	24	19	5.61457	0.000438714	0.498275	24
CG5853-RA(modencode)	0.569132	0.0108197	24	19	4.87776	0.000471049	0.498275	24
CG31019.a(modencode)	1	1	24	15	0	0.000525857	0.498275	12
CycT-RB(modencode)	1	1	24	13	0	0.000604353	0.498275	48
Aats-asn.a(modencode)	0.251755	0.000644541	24	16	0.958413	0.0043648	0.498275	24
CG10882.a(modencode)	1	1	24	9	0	0.75182	0.858056	12
CG12703.e(modencode)	1	0.695705	24	20	0.443427	0.44921	0.811727	8
CG1407.a(modencode)	0.251755	0.000644541	24	14	0.917754	0.000976797	0.498275	24
CG1407-RB(modencode)	0.251755	0.000644541	24	14	0.844993	0.000976797	0.498275	24
CG16947.b(modencode)	0.251755	0.000644541	24	12	1.63865	0.00579159	0.508539	24
CG17386-RA(modencode)	0.251755	0.000644541	24	16	3.84956	0.0130999	0.583328	24
CG30497.c(modencode)	0.251755	0.000644541	24	8	19.8547	0.0819782	0.673408	24
CG30497.g(modencode)	0.251755	0.000644541	24	8	20.1789	0.0886813	0.677878	24
CG30497-RB(modencode)	0.251755	0.000644541	24	8	19.8809	0.070382	0.667799	24
CG3887-RA(modencode)	0.251755	0.000644541	24	12	7.24799	0.0497169	0.658731	24
Cyp4s3-RA(modencode)	0.251755	0.000644541	24	2	0.291187	0.0507918	0.659377	24
gro.a(modencode)	0.251755	0.000644541	24	10	6.27614	0.00545021	0.501839	24
gro.c(modencode)	0.251755	0.000644541	24	10	5.79637	0.00853211	0.545915	24
gro.f(modencode)	0.251755	0.000644541	24	10	5.70762	0.0116154	0.572447	24
gro.g(modencode)	0.251755	0.000644541	24	10	6.2907	0.00524914	0.498275	24
gro.h(modencode)	0.251755	0.000644541	24	10	6.26009	0.00479138	0.498275	24
gro.i(modencode)	0.251755	0.000644541	24	10	5.93807	0.00604958	0.513204	24
gro-RB(modencode)	0.251755	0.000644541	24	10	5.72636	0.00850881	0.545683	24
gro-RC(modencode)	0.251755	0.000644541	24	10	6.26652	0.00524471	0.498275	24
hipk.a(modencode)	0.251755	0.000644541	24	6	3.307	0.036122	0.647462	24
Imp-RB(modencode)	1	1	24	9	0	0.610311	0.830715	12
l(2)k14710.b_l(2)k14710.b(modencode)	1	1	24	9	0.00737748	0.50046	0.81593	16
Pdp1.a(modencode)	0.251755	0.000644541	24	12	24.7351	0.00741481	0.53343	24
Pdp1.b(modencode)	0.251755	0.000644541	24	12	24.859	0.00740066	0.533252	24
Pdp1.f(modencode)	0.251755	0.000644541	24	12	23.3358	0.0073521	0.532637	24
Pdp1.h(modencode)	0.251755	0.000644541	24	12	23.2423	0.00732161	0.532247	24
Pdp1.u(modencode)	0.251755	0.000644541	24	12	21.1337	0.00776479	0.537662	24
Pdp1.v(modencode)	0.251755	0.000644541	24	12	20.8416	0.0078039	0.538116	24
Pdp1-RD(modencode)	0.251755	0.000644541	24	12	24.6304	0.00738402	0.533042	24
Pdp1-RJ(modencode)	0.251755	0.000644541	24	12	24.8394	0.0074326	0.533653	24
Zasp52-RK(modencode)	1	0.695705	24	15	1.03634	0.919428	0.880848	24
Strn-Mlck.e(modencode)	0.413166	0.0029933	24	16	0.554655	0.000662033	0.498275	24
E2f2-RA(modencode)	1	0.125882	24	16	0.284681	0.000672616	0.498275	8
E2f2.a(modencode)	0.988158	0.0826246	24	16	0.316784	0.000692103	0.498275	8
CG30005-RA(modencode)	1	0.695705	24	18	0	0.233527	0.77569	48
CG30005-IP06976(modencode)	1	0.517903	24	18	0	0.159326	0.743666	48
Strn-Mlck.a(modencode)	0.413166	0.0029933	24	16	0.481115	0.00104415	0.498275	24
CG7611.a(modencode)	1	1	24	11	0.774518	0.00107257	0.498275	16
CG7611.l(modencode)	1	1	24	11	0.770652	0.00107289	0.498275	16
CG7611.b(modencode)	1	1	24	11	0.602974	0.00109269	0.498275	16
CG7611.k(modencode)	1	1	24	11	0.599957	0.00109276	0.498275	16
Strn-Mlck-RB(modencode)	0.413166	0.0029933	24	16	0.502187	0.00110989	0.498275	24
CG7611.m(modencode)	1	1	24	11	0.720542	0.0011632	0.498275	16
CG7611-RC(modencode)	1	1	24	11	0.728438	0.00116326	0.498275	16
CG7611-RH(modencode)	1	1	24	11	0.748355	0.0011641	0.498275	16
Fhos-RB(modencode)	1	1	24	5	0.98896	0.00119469	0.498275	8
CG6175.b(modencode)	1	1	24	13	0.100716	0.136783	0.728344	16
Strn-Mlck.c(modencode)	0.413166	0.0029933	24	16	0.490379	0.0012898	0.498275	24
Strn-Mlck.b(modencode)	0.413166	0.0029933	24	16	0.502753	0.00129098	0.498275	24
CG12488-RA(modencode)	1	0.517903	24	13	0.0806102	0.319283	0.795445	24
CG7611.g(modencode)	1	1	24	11	0.756251	0.00135508	0.498275	16
psnoRNA:prp8-a(modencode)	1	1	24	5	1.56504	0.765311	0.860208	8
CG7611.i(modencode)	1	1	24	11	0.771925	0.0013729	0.498275	16
CG7611-RE(modencode)	1	1	24	11	0.73301	0.001405	0.498275	16
AGO1.g(modencode)	0.413166	0.0029933	24	8	10.5565	0.00140866	0.498275	24
CG7611-RJ(modencode)	1	1	24	11	0.69947	0.00143747	0.498275	16
AGO1.a(modencode)	0.31474	0.00144015	24	8	13.2082	0.00159816	0.498275	24
AGO1.b(modencode)	0.31474	0.00144015	24	8	13.1194	0.00183842	0.498275	24
AGO1.e(modencode)	0.31474	0.00144015	24	8	6.27868	0.00300826	0.498275	24
AGO1-RB(modencode)	0.31474	0.00144015	24	8	12.2856	0.00226508	0.498275	24
AP-1sigma.a(modencode)	0.31474	0.00144015	24	12	0.933452	0.00461273	0.498275	24
CG10208.a(modencode)	0.31474	0.00144015	24	20	1.32901	0.00665054	0.522936	24
CG10208-RA(modencode)	0.31474	0.00144015	24	20	1.19522	0.00712579	0.529678	24
CG10882-RA(modencode)	1	1	24	9	0	0.668381	0.843116	16
CG10907-RA(modencode)	0.31474	0.00144015	24	20	0.517036	0.010888	0.567326	24
CG13796-RC(modencode)	1	1	24	15	0.452195	0.804921	0.866167	8
CG30497.b(modencode)	0.31474	0.00144015	24	8	21.4004	0.0783478	0.671246	24
CG30497.e(modencode)	0.31474	0.00144015	24	8	15.5841	0.12273	0.716819	24
CG30497.f(modencode)	0.31474	0.00144015	24	8	21.7662	0.0843249	0.674713	24
CG32354.b(modencode)	1	0.695705	24	9	0	0.939417	0.883087	48
CG32354.c(modencode)	1	0.695705	24	9	0	0.953977	0.884666	48
CG32354.d(modencode)	1	0.695705	24	9	0	0.939438	0.88309	48
CG32354.e(modencode)	1	0.695705	24	9	0	0.953939	0.884662	48
CG34349.a(modencode)	1	1	24	5	0.0171827	0.671729	0.843775	12
CG34349.f(modencode)	1	1	24	5	0.0172534	0.689333	0.847155	12
CG34349-RA(modencode)	1	1	24	5	0.0245366	0.637307	0.836715	12
CG3887.a(modencode)	0.31474	0.00144015	24	12	8.76367	0.0331658	0.643872	24
CG3887.b(modencode)	0.31474	0.00144015	24	12	8.28531	0.0331668	0.643873	24
CG3887.c(modencode)	0.31474	0.00144015	24	12	8.34711	0.0331666	0.643873	24
CG4908-RA(modencode)	0.31474	0.00144015	24	16	0.226062	0.00656919	0.521702	24
CG7638-RA(modencode)	0.31474	0.00144015	24	16	0.911673	0.0151233	0.595715	24
CG8066.a(modencode)	1	1	24	9	0.758655	0.230975	0.774898	8
CG9684.a(modencode)	0.31474	0.00144015	24	14	0.475034	0.0118334	0.573875	24
CG9684-RA(modencode)	0.31474	0.00144015	24	14	0.469307	0.0118402	0.573919	24
chr2L_3101041_3101514.0(modencode)	0.31474	0.00144015	24	2	1.9333	0.00403069	0.498275	24
Cyp4aa1-IP03146(modencode)	0.31474	0.00144015	24	14	0.269549	0.00757689	0.53543	24
gro.b(modencode)	0.31474	0.00144015	24	10	5.73478	0.00881425	0.548879	24
gro.d(modencode)	0.31474	0.00144015	24	10	5.70338	0.00963669	0.556994	24
gro-RE(modencode)	0.31474	0.00144015	24	10	5.50723	0.00880498	0.548781	24
l(2)k14710.a_l(2)k14710.a(modencode)	1	1	24	9	0.0152971	0.49427	0.815467	16
l(2)k14710-RA_l(2)k14710-RA(modencode)	1	1	24	9	0.00697679	0.457791	0.812493	16
Lerp-RA(modencode)	0.31474	0.00144015	24	12	12.2037	0.00319123	0.498275	24
Lerp-RB(modencode)	0.31474	0.00144015	24	12	12.4514	0.00310935	0.498275	24
Lerp-RD(modencode)	0.31474	0.00144015	24	12	11.9162	0.00317615	0.498275	24
MED24-RA(modencode)	1	1	24	7	0	0.306315	0.793116	12
nc_19632.a(modencode)	0.31474	0.00144015	24	20	3.43901	0.0822658	0.673572	24
pnt.c(modencode)	0.31474	0.00144015	24	6	2.2194	0.00412328	0.498275	24
pnt-RD(modencode)	0.31474	0.00144015	24	6	2.55301	0.00300923	0.498275	24
RhoGAP19D.a(modencode)	0.31474	0.00144015	24	14	1.30094	0.00501778	0.498275	24
RhoGAP19D.b(modencode)	0.31474	0.00144015	24	14	1.47729	0.00531925	0.499093	24
RhoGAP19D-RA(modencode)	0.31474	0.00144015	24	14	1.32441	0.00504249	0.498275	24
RhoGAP19D-RB(modencode)	0.31474	0.00144015	24	14	1.36465	0.00504242	0.498275	24
CG7611.c(modencode)	1	1	24	11	0.774211	0.00149989	0.498275	16
CG7611.d(modencode)	1	1	24	11	0.770299	0.00150016	0.498275	16
CG7611.j(modencode)	1	1	24	11	0.770299	0.00150016	0.498275	16
AGO1-RA(modencode)	0.413166	0.0029933	24	8	13.0201	0.00163611	0.498275	24
CG9911-RB(modencode)	1	1	24	7	4.62593e-18	0.00164709	0.498275	8
CG10741.b(modencode)	1	1	24	13	0	0.00166703	0.498275	48
AGO1.i(modencode)	0.413166	0.0029933	24	8	11.2065	0.00167354	0.498275	24
Mitf-RB(modencode)	1	1	24	9	0.0771925	0.00168229	0.498275	48
Mitf.b(modencode)	1	1	24	9	0.155587	0.00171649	0.498275	48
Mitf-MIP04163(modencode)	1	1	24	9	0.154786	0.00171696	0.498275	48
Hip14.a(modencode)	1	0.517903	24	7	0.541962	0.713051	0.851484	12
psh-RA(modencode)	1	1	24	9	0	0.0017535	0.498275	48
AGO1-RC(modencode)	0.468721	0.00584689	24	8	12.5057	0.00176337	0.498275	24
CG3409-RB(modencode)	1	0.125882	24	10	2.04644	0.0018447	0.498275	24
AGO1.c(modencode)	0.413166	0.0029933	24	8	11.8014	0.00191923	0.498275	24
CG1213.g(modencode)	1	1	24	9	0	0.00194974	0.498275	8
AGO1.d(modencode)	0.468721	0.00584689	24	8	11.3433	0.00198896	0.498275	24
His2A:CG33817-RA(modencode)	1	1	24	11	0.46669	0.0020593	0.498275	48
CycT.a(modencode)	1	1	24	13	0	0.00206238	0.498275	48
CycT.b(modencode)	1	1	24	13	0	0.00207559	0.498275	48
CG10654-RA(modencode)	1	0.915543	24	11	0.450427	0.711376	0.851187	12
CG3808-RA(modencode)	0.88744	0.0525464	24	20	0.680307	0.00222558	0.498275	8
AGO1.f(modencode)	0.413166	0.0029933	24	8	10.6157	0.00226556	0.498275	24
CG10184-RA(modencode)	0.988158	0.0826246	24	14	1.34732	0.00227615	0.498275	24
CG8260-RA(modencode)	1	1	24	17	0.0401401	0.309234	0.793656	8
CG7920-RB(modencode)	1	1	24	15	0.136472	0.00238068	0.498275	12
CG1213-RA(modencode)	1	1	24	9	0	0.00242507	0.498275	8
Herp-RB(modencode)	1	0.517903	24	8	0.103308	0.32995	0.797232	24
CLIP-190.n(modencode)	1	1	24	7	8.34402e-16	0.458222	0.812531	16
AGO1.h(modencode)	0.413166	0.0029933	24	8	11.1022	0.00252074	0.498275	24
CLIP-190.q(modencode)	1	1	24	5	0.018809	0.465743	0.813179	16
CLIP-190.s(modencode)	1	1	24	5	0.00511474	0.454577	0.812209	16
alpha-Spec.a(modencode)	1	1	24	11	0.580511	0.002639	0.498275	16
CLIP-190.l(modencode)	1	1	24	9	0.0339176	0.543437	0.819416	16
CG1213.i(modencode)	1	1	24	9	0	0.00269708	0.498275	8
CLIP-190.j(modencode)	1	1	24	5	0.0365103	0.493827	0.815433	16
CLIP-190-RH(modencode)	1	1	24	9	0.033894	0.54343	0.819415	16
CG1213.j(modencode)	1	1	24	9	0	0.0027206	0.498275	8
AGO1.j(modencode)	0.468721	0.00584689	24	8	6.38984	0.00272276	0.498275	24
swm-RA(modencode)	1	1	24	15	0.522151	0.00273287	0.498275	8
swm.b(modencode)	1	1	24	15	0.527973	0.00273307	0.498275	8
Eaf6-RA(modencode)	0.768651	0.0322818	24	14	2.71197	0.0825157	0.673713	24
CG1213.h(modencode)	1	1	24	9	0	0.00280041	0.498275	8
CLIP-190-RL(modencode)	1	1	24	9	0.0317491	0.574031	0.822636	16
Eip63E.b(modencode)	1	1	24	15	0	0.00289334	0.498275	48
nc_4354.a(modencode)	1	0.517903	24	16	2.50952	0.885422	0.876836	24
CLIP-190.u(modencode)	1	1	24	5	0.107386	0.373445	0.803527	16
CLIP-190.r(modencode)	1	1	24	7	0	0.464396	0.813064	16
CG13139-RA(modencode)	1	1	24	13	0	0.00297518	0.498275	9
CG13139.a(modencode)	1	1	24	13	0	0.00297767	0.498275	9
CG31345-RA(modencode)	1	0.695705	24	22	1.39399	0.602822	0.829038	24
Aplip1-RA(modencode)	0.413166	0.0029933	24	12	1.20597	0.0513812	0.65972	24
Aplip1-RB(modencode)	0.413166	0.0029933	24	12	1.12161	0.0499958	0.658901	24
Bmcp-RB(modencode)	0.413166	0.0029933	24	15	0.715026	0.0472704	0.657158	24
CG10513-RB(modencode)	0.413166	0.0029933	24	0	2.3039	0.0140673	0.58963	24
CG12325-RA(modencode)	1	0.268421	24	0	0.0634982	0.859014	0.873528	48
CG13097-RA(modencode)	0.413166	0.0029933	24	0	0.365433	0.068867	0.667313	24
CG14329.a(modencode)	0.413166	0.0029933	24	2	2.88082	0.0133886	0.585288	24
CG14329-RA(modencode)	0.413166	0.0029933	24	2	2.8833	0.0133901	0.585299	24
CG1582-RA(modencode)	0.413166	0.0029933	24	21	0.14722	0.0429795	0.65399	24
CG16947.a(modencode)	0.413166	0.0029933	24	12	1.81677	0.00506812	0.498275	24
CG30497.a(modencode)	0.413166	0.0029933	24	8	24.1101	0.0859442	0.675575	24
CG30497-RC(modencode)	0.413166	0.0029933	24	8	23.1269	0.0894602	0.67851	24
CG32425.b(modencode)	0.413166	0.0029933	24	12	2.25609	0.0321545	0.642503	24
CG32425-RE(modencode)	0.413166	0.0029933	24	12	2.34816	0.0323282	0.642743	24
CG32549.b(modencode)	1	0.377215	24	14	2.95945	0.39455	0.80611	8
CG32549-RB(modencode)	1	0.377215	24	14	2.99241	0.394537	0.806108	8
CG32549-RD(modencode)	1	0.517903	24	15	3.29858	0.502578	0.816086	8
CG33181.m(modencode)	0.413166	0.0029933	24	10	7.49427	0.0574766	0.66287	24
CG33181.r(modencode)	0.413166	0.0029933	24	10	6.97801	0.0785311	0.671359	24
CG33477-RA(modencode)	1	1	24	5	0.9273	0.806738	0.866428	16
CG33970.a(modencode)	0.413166	0.0029933	24	18	0.482318	0.0524297	0.660311	24
CG42388.i(modencode)	1	1	24	11	0.150496	0.730348	0.85449	16
CG42388.w(modencode)	1	1	24	11	0.141822	0.730397	0.854498	16
CG4797-RA(modencode)	1	0.915543	24	20	0	0.280016	0.787783	8
CG8359-RA(modencode)	0.413166	0.0029933	24	16	1.46619	0.035419	0.646659	24
CG9328.b(modencode)	0.413166	0.0029933	24	14	6.1263	0.027948	0.635828	24
CG9328-RA(modencode)	0.413166	0.0029933	24	14	4.31229	0.022049	0.622601	24
chr3R_7773104_7774868.0(modencode)	0.413166	0.0029933	24	2	1.68249	0.0123893	0.578173	24
coro.a(modencode)	1	1	24	15	0.0550129	0.0866669	0.676196	24
coro-RA(modencode)	1	1	24	15	0.0538815	0.0896598	0.678671	24
Cyp4aa1-RB(modencode)	0.413166	0.0029933	24	14	0.155776	0.0041346	0.498275	24
gb-RA(modencode)	0.413166	0.0029933	24	2	1.02778	0.0442413	0.654982	24
gro-RD(modencode)	0.413166	0.0029933	24	10	5.89812	0.0100206	0.560396	24
hipk-RA(modencode)	0.413166	0.0029933	24	6	3.11912	0.0471231	0.657059	24
hipk-RB(modencode)	0.413166	0.0029933	24	6	2.98618	0.0527462	0.660486	24
nc_20501.a(modencode)	0.413166	0.0029933	24	6	22.5652	0.0131829	0.583899	24
PICK1.a(modencode)	0.413166	0.0029933	24	8	0.0649124	0.0369821	0.648406	24
PICK1.c(modencode)	0.413166	0.0029933	24	8	0	0.0641675	0.665664	24
pnt-RC(modencode)	0.413166	0.0029933	24	6	2.68241	0.0257562	0.631561	24
rdgB-RH(modencode)	0.413166	0.0029933	24	18	0.223516	0.085258	0.675214	24
snoRNA:Psi18S-1377b-RA(modencode)	0.413166	0.0029933	24	8	7.25492	0.0831231	0.674053	24
Strn-Mlck.i(modencode)	0.413166	0.0029933	24	16	0.213688	0.00560744	0.505004	24
Strn-Mlck.k(modencode)	0.413166	0.0029933	24	16	0.231295	0.00443672	0.498275	24
Strn-Mlck.l(modencode)	0.413166	0.0029933	24	16	0.21786	0.0051869	0.498275	24
Strn-Mlck-RF(modencode)	0.413166	0.0029933	24	16	0.217718	0.00518627	0.498275	24
TotA.b(modencode)	1	1	24	17	0	0.227291	0.773727	8
vri-RD(modencode)	0.413166	0.0029933	24	12	6.17198	0.0665016	0.666511	24
Zasp52-RF(modencode)	1	1	24	15	0.110733	0.143448	0.733126	48
CG1213.c(modencode)	1	1	24	9	0	0.00303493	0.498275	8
CG1213.a(modencode)	1	1	24	9	0	0.00305602	0.498275	8
chr3R_18122758_18123407.0(modencode)	1	1	24	13	1.57633	0.00306173	0.498275	16
CG1213.d(modencode)	1	1	24	9	0	0.00306744	0.498275	8
CG9911-RA(modencode)	1	1	24	9	0	0.00306971	0.498275	8
Prx2540-2-RA(modencode)	1	0.268421	24	15	2.38822	0.00307617	0.498275	24
ck-RA(modencode)	1	1	24	15	0	0.605673	0.829677	16
CLIP-190.p(modencode)	1	1	24	5	0.0826608	0.396202	0.806301	16
CG1213.b(modencode)	1	1	24	9	0	0.00319792	0.498275	8
CG9766.a(modencode)	1	1	24	13	0.324232	0.556762	0.820859	24
Vha16-GM13095(modencode)	1	1	24	7	3.42772	0.00330525	0.498275	48
ck-RB(modencode)	1	1	24	15	0	0.605534	0.829646	16
CG1213.f(modencode)	1	1	24	9	0	0.00333602	0.498275	8
Sec16-RE(modencode)	1	1	24	17	0.0632389	0.00335624	0.498275	12
CG1213-RB(modencode)	1	1	24	9	0	0.00336358	0.498275	8
CG1213.e(modencode)	1	1	24	9	0	0.00345675	0.498275	8
CG12897-IP06528(modencode)	1	1	24	13	3.76996	0.00362839	0.498275	8
CG30387.b(modencode)	1	1	24	13	0.122424	0.00364506	0.498275	9
beat-IV-RA(modencode)	1	0.517903	24	20	5.13091	0.649766	0.839343	12
beat-IV.a(modencode)	1	0.517903	24	20	5.20834	0.643465	0.838025	12
CaMKI.v(modencode)	1	1	24	15	0	0.00369516	0.498275	48
CaMKI.e(modencode)	1	1	24	15	0	0.00369518	0.498275	48
Cyp12c1-RA(modencode)	1	1	24	17	0.567217	0.511244	0.816712	8
CaMKI.x(modencode)	1	1	24	15	0	0.00372128	0.498275	48
CG11407-RA(modencode)	0.468721	0.00584689	24	21	11.3846	0.00373653	0.498275	24
Ugt35b.a(modencode)	0.468721	0.00584689	24	2	4.05271	0.00375823	0.498275	24
CaMKI.h(modencode)	1	1	24	15	0	0.00379249	0.498275	48
CaMKI.f(modencode)	1	1	24	15	0	0.00380406	0.498275	48
CaMKI.p(modencode)	1	1	24	15	0	0.00381427	0.498275	48
CaMKI.r(modencode)	1	1	24	15	0	0.00381441	0.498275	48
CaMKI.u(modencode)	1	1	24	15	0	0.00385768	0.498275	48
CaMKI.o(modencode)	1	1	24	15	0	0.00386958	0.498275	48
CaMKI.n(modencode)	1	1	24	15	0	0.00388452	0.498275	48
Ugt35b-RA(modencode)	0.468721	0.00584689	24	2	3.62555	0.0039288	0.498275	24
CaMKI.g(modencode)	1	1	24	15	0	0.00393893	0.498275	48
CaMKI.q(modencode)	1	1	24	15	0	0.00394752	0.498275	48
capricious-RA(modencode)	1	1	24	7	0.427635	0.0194688	0.614574	48
CG11050-RB(modencode)	1	0.517903	24	15	1.06936	0.703712	0.849809	24
CG1213-MIP08194(modencode)	1	1	24	9	0	0.00401666	0.498275	8
CaMKI.w(modencode)	1	1	24	15	0	0.00402644	0.498275	48
CG30387-RG(modencode)	1	1	24	9	0.597387	0.00404284	0.498275	9
zf30C.a(modencode)	1	1	24	13	0.233251	0.00409488	0.498275	16
zf30C-RA(modencode)	1	1	24	13	0.225543	0.00409504	0.498275	16
CaMKI-RA(modencode)	1	1	24	15	0	0.00410188	0.498275	48
CaMKI-RC(modencode)	1	1	24	15	0	0.00418846	0.498275	48
gammaSnap-RA(modencode)	1	1	24	9	0	0.0826076	0.673765	12
CaMKI-RG(modencode)	1	1	24	15	0	0.0042087	0.498275	48
CG3287.a(modencode)	1	1	24	11	0.234759	0.00423664	0.498275	9
Strn-Mlck.j(modencode)	0.569132	0.0108197	24	16	0.222385	0.00423914	0.498275	24
Mitf.g(modencode)	1	1	24	9	0.121764	0.00423935	0.498275	48
Strn-Mlck.m(modencode)	0.569132	0.0108197	24	16	0.222456	0.00424252	0.498275	24
CaMKI.a(modencode)	1	1	24	15	0	0.00424661	0.498275	48
CaMKI.s(modencode)	1	1	24	15	0	0.00425376	0.498275	48
CaMKI.d(modencode)	1	1	24	15	0	0.00425941	0.498275	48
CG13557-RA(modencode)	0.626927	0.0190899	24	2	0.242113	0.00426699	0.498275	24
CG7611-RD(modencode)	1	1	24	17	0.433904	0.00428218	0.498275	16
CaMKI.y(modencode)	1	1	24	15	0	0.00429211	0.498275	48
CaMKI-RB(modencode)	1	1	24	15	0	0.00433311	0.498275	48
Mitf.f(modencode)	1	1	24	9	0.10847	0.00433771	0.498275	48
CG18259-RA(modencode)	1	1	24	7	0.0892369	0.0551415	0.661742	16
CG3287-RB(modencode)	1	1	24	11	0.225803	0.0044006	0.498275	9
ash2-RC(modencode)	1	1	24	13	0.229715	0.00441409	0.498275	48
ash2-RD(modencode)	1	1	24	13	0.235419	0.0044144	0.498275	48
CaMKI.t(modencode)	1	1	24	15	0	0.00442792	0.498275	48
ash2-MIP16976(modencode)	1	1	24	13	0.354001	0.00452906	0.498275	48
CG8646-RB(modencode)	1	1	24	15	0	0.00453318	0.498275	48
CG8646.a(modencode)	1	1	24	15	9.25186e-18	0.00453337	0.498275	48
CaMKI.m(modencode)	1	1	24	15	0	0.00456267	0.498275	48
CG4615.a(modencode)	0.626927	0.0190899	24	18	1.58675	0.040755	0.6521	24
CG10924-RA(modencode)	1	1	24	15	0.0126101	0.76863	0.860728	8
CG10924.a(modencode)	1	1	24	15	0.0141186	0.811555	0.867115	8
CG3287.d(modencode)	1	1	24	5	0.299507	0.00464997	0.498275	9
chr2L_9725750_9726266.0(modencode)	1	1	24	7	8.99136	0.0046618	0.498275	48
Ack-RA(modencode)	1	1	24	9	0.0714178	0.655988	0.840624	8
CG30387-RD(modencode)	1	1	24	13	0.0601512	0.00468885	0.498275	9
CaMKI.j(modencode)	1	1	24	15	0	0.00469867	0.498275	48
CaMKI-RE(modencode)	1	1	24	15	0	0.00473374	0.498275	48
chr2L_2000414_2000927.0(modencode)	1	0.695705	24	13	0.258023	0.964338	0.885763	16
CaMKI.c(modencode)	1	1	24	15	0	0.00476767	0.498275	48
CG32549.a(modencode)	1	0.186301	24	16	2.00387	0.323052	0.796089	8
CaMKI.b(modencode)	1	1	24	15	0	0.00480074	0.498275	48
Mitf-RA(modencode)	1	1	24	11	0	0.00480912	0.498275	48
CaMKI.i(modencode)	1	1	24	15	0	0.00481148	0.498275	48
CaMKI.k(modencode)	1	1	24	15	0	0.00487181	0.498275	48
CG7722-RA(modencode)	1	1	24	9	0.0382309	0.00489931	0.498275	48
CaMKI-RH(modencode)	1	1	24	15	0	0.00492847	0.498275	48
CaMKI.l(modencode)	1	1	24	15	0	0.00500336	0.498275	48
CG4615-RA(modencode)	0.626927	0.0190899	24	18	1.39024	0.0533485	0.660812	24
CaMKI-RD(modencode)	1	1	24	15	0	0.0050317	0.498275	48
Grip84.c(modencode)	1	1	24	13	0.10279	0.478084	0.814201	12
Grip84-RE(modencode)	1	1	24	13	0.101187	0.480389	0.814386	12
CG3198.a(modencode)	1	0.695705	24	6	0.692328	0.75739	0.858952	16
Mitf.c(modencode)	1	1	24	11	0	0.00517184	0.498275	48
Mitf.a(modencode)	1	1	24	11	0	0.00517297	0.498275	48
dpr16-RA(modencode)	1	1	24	15	0.174231	0.402385	0.807003	16
Hydr2.c(modencode)	0.468721	0.00584689	24	16	4.36935	0.00519592	0.498275	24
CG30065-RA(modencode)	1	1	24	13	0	0.00520618	0.498275	16
Hip14-RA(modencode)	1	0.517903	24	7	0.547583	0.625959	0.834246	12
CG11900-RA(modencode)	1	0.186301	24	16	3.67547	0.102202	0.695312	24
Usf-RB(modencode)	1	1	24	13	0.479065	0.0337566	0.644636	48
CG12858.b(modencode)	1	1	24	7	0	0.00528722	0.498722	48
CG10924-RB(modencode)	1	1	24	15	0.0109366	0.768747	0.860746	48
CG7224-RB(modencode)	1	1	24	9	0	0.00537337	0.50024	48
Mitf.d(modencode)	1	1	24	9	0.158486	0.00550804	0.50302	48
CG10924.c(modencode)	1	1	24	15	0	0.751152	0.857947	48
CG1213-RH38183(modencode)	1	1	24	7	0	0.0055357	0.503578	8
CG12858.a(modencode)	1	1	24	7	0	0.00558398	0.504541	48
Pabp2-RB(modencode)	1	1	24	15	0	0.780167	0.862504	9
CG10924.b(modencode)	1	1	24	15	0	0.725538	0.853666	48
sinu-RA(modencode)	0.626927	0.0190899	24	14	0.26064	0.54029	0.819066	24
Mitf.e(modencode)	1	1	24	11	0	0.00565753	0.505984	48
CG6040-RA(modencode)	0.569132	0.0108197	24	11	1.61425	0.00566832	0.506193	24
Dpck-RA(modencode)	1	1	24	13	1.29035	0.649562	0.839301	16
Grip84-RA(modencode)	1	1	24	15	0.0709935	0.587904	0.825608	12
5-HT1B-RA(modencode)	0.468721	0.00584689	24	16	1.07183	0.223756	0.77257	24
5-HT1B-RB(modencode)	0.468721	0.00584689	24	16	1.00232	0.223693	0.77255	24
Aats-cys-RA(modencode)	1	0.915543	24	2	0.158958	0.541984	0.819255	12
Aats-thr.a(modencode)	0.468721	0.00584689	24	12	1.04489	0.138659	0.72973	24
AIF.b(modencode)	0.468721	0.00584689	24	18	0.766787	0.0949222	0.685876	24
AIF-RA(modencode)	0.468721	0.00584689	24	18	0.866771	0.0597831	0.663901	24
AIF-RB(modencode)	0.468721	0.00584689	24	18	0.764312	0.0609459	0.664392	24
Amph.a(modencode)	0.468721	0.00584689	24	11	16.7154	0.0129334	0.582163	24
Amph.b(modencode)	0.468721	0.00584689	24	22	14.9847	0.0173688	0.606495	24
Amph.c(modencode)	0.468721	0.00584689	24	22	14.8279	0.0171179	0.605413	24
Amph.d(modencode)	0.468721	0.00584689	24	22	14.8121	0.0178428	0.608465	24
Amph.e(modencode)	0.468721	0.00584689	24	22	14.6252	0.0178016	0.608297	24
Amph.f(modencode)	0.468721	0.00584689	24	22	14.6153	0.0165057	0.602654	24
Amph.g(modencode)	0.468721	0.00584689	24	22	15.4029	0.00995586	0.559838	24
Amph.h(modencode)	0.468721	0.00584689	24	22	14.4586	0.0172403	0.605945	24
Amph-RA(modencode)	0.468721	0.00584689	24	22	14.1081	0.0170335	0.605043	24
Arf51F.c(modencode)	0.468721	0.00584689	24	14	9.01264	0.0453076	0.65578	24
Arf51F.d(modencode)	0.468721	0.00584689	24	14	8.73991	0.0435451	0.654442	24
Arf51F.e(modencode)	0.468721	0.00584689	24	14	9.0038	0.0394011	0.650851	24
Arf51F.f(modencode)	0.468721	0.00584689	24	14	9.1064	0.0378057	0.649271	24
Arf51F-RA(modencode)	0.468721	0.00584689	24	14	9.21049	0.0453061	0.655779	24
Arf51F-RB(modencode)	0.468721	0.00584689	24	14	8.92652	0.0435451	0.654442	24
Arf51F-RC(modencode)	0.468721	0.00584689	24	14	9.19946	0.0393985	0.650849	24
Arf51F-RD(modencode)	0.468721	0.00584689	24	14	9.51759	0.0370351	0.648463	24
Bmcp.a(modencode)	0.468721	0.00584689	24	16	0.685964	0.0610818	0.664448	24
CG12703.f(modencode)	1	0.517903	24	20	0.295571	0.544071	0.819486	8
CG13796-RA(modencode)	1	1	24	15	0.4278	0.802649	0.865839	8
CG13796-RB(modencode)	1	1	24	15	0.425796	0.802633	0.865836	8
CG13796-RD(modencode)	1	1	24	15	0.44239	0.784576	0.863171	8
CG15117.a(modencode)	1	0.268421	24	18	0.119784	0.261636	0.783473	24
CG15117-RA(modencode)	0.468721	0.00584689	24	18	0.330997	0.0162341	0.601372	24
CG15117-RB(modencode)	0.468721	0.00584689	24	18	0.260074	0.0283798	0.636597	24
CG15117-RC(modencode)	1	0.186301	24	18	0.116814	0.238628	0.777226	24
CG17292.a(modencode)	1	1	24	15	0	0.994313	0.888824	8
CG17646.a(modencode)	0.468721	0.00584689	24	5	1.28559	0.0692014	0.667422	24
CG17746.a(modencode)	1	0.268421	24	16	0.985495	0.444711	0.811314	24
CG17746.c(modencode)	1	0.268421	24	16	1.17182	0.444734	0.811316	24
CG17746-RA(modencode)	1	0.268421	24	16	1.28036	0.44467	0.81131	24
CG2970.a(modencode)	0.468721	0.00584689	24	12	0.681934	0.0563645	0.662344	24
CG2970-RA(modencode)	0.468721	0.00584689	24	12	0.769049	0.0822106	0.67354	24
CG30015.a(modencode)	0.468721	0.00584689	24	20	0.480762	0.108837	0.703	24
CG30497-RA(modencode)	0.468721	0.00584689	24	8	16.1222	0.118361	0.712768	24
CG31122-RA(modencode)	0.468721	0.00584689	24	6	0.219839	0.0722298	0.668365	24
CG32549-RF(modencode)	1	0.695705	24	15	3.09847	0.476696	0.814088	8
CG33181.a(modencode)	0.468721	0.00584689	24	10	7.08401	0.0747793	0.669198	24
CG33181.b(modencode)	0.468721	0.00584689	24	10	8.14488	0.0990654	0.691385	24
CG33181.e(modencode)	0.468721	0.00584689	24	10	8.01102	0.0842676	0.674682	24
CG33181.f(modencode)	0.468721	0.00584689	24	10	7.79564	0.0823737	0.673633	24
CG33181.g(modencode)	0.468721	0.00584689	24	10	7.37781	0.101176	0.694049	24
CG33181.h(modencode)	0.468721	0.00584689	24	10	6.80894	0.0579336	0.66308	24
CG33181.j(modencode)	0.468721	0.00584689	24	10	7.27521	0.0864155	0.675981	24
CG33181.k(modencode)	0.468721	0.00584689	24	10	7.11215	0.0845748	0.674848	24
CG33181.l(modencode)	0.468721	0.00584689	24	10	7.97164	0.100508	0.693216	24
CG33181.q(modencode)	0.468721	0.00584689	24	10	6.42081	0.0793098	0.671837	24
CG33303.a(modencode)	0.468721	0.00584689	24	18	0.17013	0.0380615	0.649533	24
CG33303-RA(modencode)	0.468721	0.00584689	24	18	0.206334	0.0338271	0.644726	24
CG34134-RA(modencode)	0.468721	0.00584689	24	18	5.20862	0.0179091	0.608733	24
CG34353.i(modencode)	0.468721	0.00584689	24	20	0.865569	0.135236	0.727176	24
CG42270-RC(modencode)	0.468721	0.00584689	24	13	1.81147	0.00780964	0.538182	24
CG42330.m(modencode)	0.468721	0.00584689	24	6	0.537684	0.282399	0.788304	24
CG4797-RB(modencode)	1	0.695705	24	20	0	0.235371	0.776252	8
CG5254.a(modencode)	0.468721	0.00584689	24	20	0.958837	0.0256925	0.631427	24
CG5664-RA(modencode)	0.468721	0.00584689	24	18	0.433739	0.0767867	0.670258	24
CG6854.a(modencode)	0.468721	0.00584689	24	10	1.00593	0.0961002	0.687481	24
CG6854-RA(modencode)	0.468721	0.00584689	24	10	0.918885	0.0886054	0.677816	24
CG7135-RA(modencode)	0.88744	0.0525464	24	16	3.21224	0.242581	0.778376	24
CG8066-RA(modencode)	1	1	24	7	2.77556e-17	0.200898	0.764214	8
CG9328.a(modencode)	0.468721	0.00584689	24	14	5.6239	0.0298592	0.639076	24
chr2R_5466078_5466484.0(modencode)	0.468721	0.00584689	24	0	8.66093	0.0558284	0.662083	24
chr3L_633013_633779.0(modencode)	0.468721	0.00584689	24	4	3.74024	0.0238627	0.6273	24
coro.b(modencode)	1	1	24	13	0.169894	0.0803825	0.67248	24
coro-RC(modencode)	1	1	24	15	0.0459148	0.0795174	0.671962	24
dbr.b(modencode)	0.468721	0.00584689	24	19	0.262655	0.0794233	0.671905	24
DCAP-RG(modencode)	0.468721	0.00584689	24	17	2.66742	0.0806983	0.672666	24
gammaCop-RA(modencode)	1	1	24	7	0.122659	0.787422	0.863598	9
Grd.a(modencode)	0.468721	0.00584689	24	18	0.259437	0.024136	0.627953	24
Grd-RA(modencode)	0.468721	0.00584689	24	18	0.375898	0.0574692	0.662866	24
GV1.b(modencode)	1	0.915543	24	12	0.773151	0.247152	0.779664	8
GV1.e(modencode)	1	0.915543	24	12	0.718845	0.261877	0.783533	8
hipk.b(modencode)	0.468721	0.00584689	24	6	3.16098	0.0662138	0.66641	24
hipk.d(modencode)	0.468721	0.00584689	24	6	3.5098	0.0148927	0.594449	24
Hydr2.a(modencode)	0.468721	0.00584689	24	15	6.44492	0.0176803	0.6078	24
Hydr2.b(modencode)	0.468721	0.00584689	24	15	6.15572	0.0178224	0.608382	24
Hydr2-RA(modencode)	0.468721	0.00584689	24	15	6.12948	0.0177008	0.607885	24
jim.d(modencode)	0.468721	0.00584689	24	10	1.5038	0.211977	0.768467	24
l(1)G0334-RA_l(1)G0334-RA(modencode)	0.468721	0.00584689	24	14	3.03653	0.0373198	0.648765	24
l(1)G0334-RD_l(1)G0334-RD(modencode)	0.468721	0.00584689	24	14	3.50951	0.0348314	0.645965	24
l(3)05822.b_l(3)05822.b(modencode)	0.468721	0.00584689	24	20	0.498652	0.130533	0.72348	24
l(3)05822-RB_l(3)05822-RB(modencode)	0.468721	0.00584689	24	20	0.353129	0.146189	0.735084	24
lectin-24Db-RA(modencode)	1	1	24	15	0	0.482612	0.814563	16
mats.a(modencode)	1	1	24	9	0.0241831	0.0839783	0.674525	8
mRpL16-RA(modencode)	0.468721	0.00584689	24	18	0.62183	0.0721661	0.668346	24
mRpL52-RA(modencode)	0.468721	0.00584689	24	10	0.625719	0.0381574	0.64963	24
mub.i(modencode)	0.468721	0.00584689	24	8	15.3088	0.0308952	0.640681	24
mub.q(modencode)	0.468721	0.00584689	24	8	15.6141	0.0307363	0.640442	24
mub.r(modencode)	0.468721	0.00584689	24	8	15.4987	0.0311235	0.641022	24
neur.a(modencode)	0.468721	0.00584689	24	18	0.297975	0.0365191	0.647903	24
neur-RD(modencode)	0.468721	0.00584689	24	18	0.285105	0.0275093	0.635024	24
NP15_6-RA(modencode)	0.988158	0.0826246	24	12	1.41916	0.174612	0.752222	24
PICK1-RA(modencode)	0.468721	0.00584689	24	8	0.104935	0.0346877	0.645792	24
pnt.b(modencode)	0.468721	0.00584689	24	7	2.4917	0.0472846	0.657168	24
RhoGAP19D.c(modencode)	0.468721	0.00584689	24	14	1.17231	0.0126955	0.580453	24
RhoGAP19D.d(modencode)	0.468721	0.00584689	24	14	1.18186	0.0124573	0.578688	24
RhoGAP68F.a(modencode)	0.468721	0.00584689	24	10	0.536977	0.0276548	0.635293	24
SmD3.a(modencode)	0.468721	0.00584689	24	22	1.23291	0.0103375	0.563043	24
SmD3-RA(modencode)	0.468721	0.00584689	24	22	1.52212	0.0161599	0.601015	24
tim.b(modencode)	0.468721	0.00584689	24	14	30.6501	0.0196718	0.615274	24
tim.c(modencode)	0.468721	0.00584689	24	14	28.4196	0.0135571	0.586401	24
tim-RC(modencode)	0.468721	0.00584689	24	14	30.8638	0.0198358	0.615829	24
Uhg5-RD(modencode)	0.468721	0.00584689	24	10	4.93843	0.0669362	0.666662	24
wds-RA(modencode)	0.468721	0.00584689	24	20	1.29217	0.0611045	0.664458	24
ftz-f1.g(modencode)	1	1	24	11	0	0.0305346	0.640134	48
Grip84-RD(modencode)	1	1	24	15	0.0593734	0.639077	0.837094	12
CG9965.c(modencode)	1	1	24	7	10.7271	0.00589662	0.510477	16
CG9965.a(modencode)	1	1	24	7	9.7276	0.00594116	0.511283	16
CG9965.d(modencode)	1	1	24	7	11.2861	0.00604135	0.51306	16
Su(dx)-RA_Su(dx)-RA(modencode)	1	1	24	13	0.0665623	0.00605551	0.513308	12
CG17528.c(modencode)	1	1	24	5	0.141916	0.459267	0.812622	12
ssp4-RC(modencode)	1	1	24	5	0.0869034	0.0271565	0.63436	16
CG3999.b(modencode)	1	1	24	17	0	0.00617195	0.515308	48
CG12858-RA(modencode)	1	1	24	7	2.96059e-16	0.0062873	0.517232	48
sinu-RB(modencode)	0.768651	0.0322818	24	14	0.32633	0.698592	0.848875	24
Prx2540-1.a(modencode)	1	0.377215	24	15	3.69011	0.00647781	0.520287	24
Strn-Mlck.d(modencode)	0.569132	0.0108197	24	16	0.449437	0.00658895	0.522004	24
CG9363-RB(modencode)	0.626927	0.0190899	24	6	0.646366	0.00659574	0.522107	24
Prosalpha7-RA(modencode)	1	1	24	13	3.21125	0.544126	0.819492	9
nc_13463.a(modencode)	1	0.125882	24	19	2.36209	0.00668585	0.523463	24
CdGAPr-RB(modencode)	1	1	24	15	0.271718	0.00671388	0.523879	8
Cyp12b2-RA(modencode)	1	1	24	15	0	0.0067397	0.524259	24
Prosalpha7.a(modencode)	1	1	24	13	3.44375	0.544135	0.819493	9
Prosalpha7-AT17601(modencode)	1	1	24	13	3.7166	0.544128	0.819492	9
CG6175-RB(modencode)	1	1	24	13	0.16122	0.220225	0.771382	16
CG2976-RA(modencode)	1	1	24	11	0.108777	0.00682482	0.525497	48
Vha100-2.a(modencode)	1	1	24	11	0.0488375	0.00695545	0.527348	12
RhoGAPp190.c(modencode)	1	1	24	9	0	0.00696057	0.527419	8
CdGAPr-RA(modencode)	1	1	24	15	0.24209	0.00699187	0.527854	8
CG7224.b(modencode)	1	1	24	9	0	0.00700889	0.528089	48
CG7224.a(modencode)	1	1	24	9	0	0.0070089	0.528089	48
CG7224.c(modencode)	1	1	24	9	0	0.00700897	0.52809	48
nemy-RB(modencode)	1	1	24	17	0	0.627094	0.834496	12
CG4619-RA(modencode)	0.768651	0.0322818	24	18	3.85819	0.00717723	0.530364	24
Socs44A-RA(modencode)	0.88744	0.0525464	24	20	0.0615183	0.00718584	0.530478	8
CG6040.b(modencode)	0.626927	0.0190899	24	11	1.71997	0.00728188	0.531735	24
PGRP-LC-RA(modencode)	1	1	24	7	0.341014	0.00731792	0.5322	48
CG8064-RA(modencode)	1	1	24	7	0	0.00732203	0.532252	8
swm.a(modencode)	1	1	24	15	0.575302	0.00738045	0.532997	8
CG7224-RA(modencode)	1	1	24	9	0	0.00744622	0.533824	48
CG17528-RA(modencode)	1	1	24	5	0.120821	0.349643	0.800264	12
CG17528.l(modencode)	1	1	24	5	0.0349782	0.227005	0.773635	12
CG17528.j(modencode)	1	1	24	5	0.0357325	0.227001	0.773633	12
CG7611.f(modencode)	1	1	24	13	0.438948	0.00762854	0.536053	16
fos28F-RC(modencode)	1	0.915543	24	16	0.0582892	0.696747	0.848535	16
ash2-RB(modencode)	1	1	24	17	0	0.00773417	0.537305	48
Grip84-RC(modencode)	1	1	24	15	0.0799031	0.336659	0.798302	12
RhoGAPp190.f(modencode)	1	1	24	13	0.653932	0.00781794	0.538278	8
CG17528.h(modencode)	1	1	24	5	0.0362746	0.221287	0.771743	12
CG17528.g(modencode)	1	1	24	5	0.0420257	0.230838	0.774855	12
Strn-Mlck-RG(modencode)	0.569132	0.0108197	24	16	0.480408	0.00797161	0.540017	24
tio.a(modencode)	1	0.377215	24	16	0.359564	0.768583	0.86072	12
CG6672-RA(modencode)	1	0.186301	24	18	0.551614	0.00803675	0.540738	8
TwdlE-RA(modencode)	1	1	24	7	0	0.00805452	0.540933	48
app-RM(modencode)	1	1	24	7	0.0066468	0.00808577	0.541274	9
wun-RA(modencode)	1	1	24	11	0.78998	0.00809228	0.541345	48
Taspase1-RA(modencode)	1	1	24	11	0.0489082	0.917933	0.880677	9
CG4721-RA(modencode)	1	0.915543	24	22	0.114268	0.293681	0.790665	8
Ipp-RA(modencode)	1	1	24	15	0	0.0893255	0.678402	48
TotF.a(modencode)	1	1	24	11	0.0220146	0.00824825	0.543012	9
CG7692.c(modencode)	1	1	24	15	0	0.00825615	0.543095	16
CG7692.b(modencode)	1	1	24	15	0	0.00825665	0.543101	16
CG7692.a(modencode)	1	1	24	15	0	0.00825688	0.543103	16
CG7692.d(modencode)	1	1	24	15	0	0.00826073	0.543143	16
CG7692-RA(modencode)	1	1	24	15	0	0.00826208	0.543158	16
chr3L_7802408_7802889.0(modencode)	1	0.517903	24	21	1.47326	0.544619	0.819547	24
GH10215(modencode)	1	1	24	17	0	0.627011	0.834478	12
CG7611.e(modencode)	1	1	24	15	0.739422	0.00834509	0.544021	16
Hs3st-A-RA(modencode)	1	1	24	17	2.0681	0.0083919	0.544502	48
PGRP-LC-RD(modencode)	1	1	24	7	0.337243	0.0084003	0.544588	48
Rbf.e(modencode)	1	1	24	15	0.270728	0.00841432	0.54473	8
Rbf.d(modencode)	1	1	24	15	0.291776	0.00841471	0.544734	8
Hs3st-A.c(modencode)	1	1	24	17	1.98982	0.00843596	0.54495	48
CG9485.c(modencode)	0.88744	0.0525464	24	16	1.23355	0.00844153	0.545006	24
CG9485-RD(modencode)	0.88744	0.0525464	24	16	1.23411	0.00844245	0.545016	24
CG9485.e(modencode)	0.88744	0.0525464	24	16	1.25943	0.00844246	0.545016	24
CG9485-RA(modencode)	0.88744	0.0525464	24	16	1.24161	0.00844291	0.54502	24
CG9485.g(modencode)	0.88744	0.0525464	24	16	1.18766	0.00844311	0.545023	24
CG9485-RE(modencode)	0.88744	0.0525464	24	16	1.20618	0.00844317	0.545023	24
beat-IV.b(modencode)	1	0.915543	24	20	2.68298	0.719373	0.852597	9
Grip84-RB(modencode)	1	1	24	15	0.0607169	0.439967	0.81087	12
PGRP-LC.a(modencode)	1	1	24	7	0.274075	0.00849306	0.545525	48
CG9911-RC(modencode)	1	1	24	7	0.0570871	0.00849521	0.545547	8
MCPH1.a(modencode)	1	0.377215	24	20	0.217435	0.48707	0.814913	16
Rbf.b(modencode)	1	1	24	15	0.315652	0.00856653	0.546256	8
Rbf.c(modencode)	1	1	24	15	0.307969	0.00856703	0.546261	8
beat-IV.c(modencode)	1	0.695705	24	20	2.84342	0.705508	0.850134	9
CG9485-RB(modencode)	0.768651	0.0322818	24	16	1.1465	0.00860018	0.546587	24
CG9485.f(modencode)	0.768651	0.0322818	24	16	1.13462	0.00862396	0.546819	24
app-RL(modencode)	1	1	24	7	0.0321498	0.00871727	0.547839	9
chr2R_9360956_9361389.0(modencode)	1	1	24	9	2.16238	0.834468	0.870291	8
Mob4.a(modencode)	1	0.695705	24	9	0.166382	0.442027	0.811064	48
CG42233.a(modencode)	1	1	24	9	0	0.00883243	0.549072	16
CG42233-RB(modencode)	1	1	24	9	0	0.00883482	0.549098	16
CG15210-RA(modencode)	1	1	24	11	0.356075	0.79376	0.86454	16
Su(Ste):CR42436-RA_Su(Ste):CR42436-RA(modencode)	1	0.377215	24	11	0.36218	0.515355	0.817002	24
Nup62-RA(modencode)	1	1	24	17	0.512299	0.555255	0.820699	9
CG34232-RA(modencode)	1	1	24	13	0.950069	0.605477	0.829634	16
hoe2-IP03717(modencode)	1	1	24	7	0.562668	0.401068	0.806855	12
CG4663-RA(modencode)	0.626927	0.0190899	24	15	0.607617	0.00935695	0.554368	24
CG17528-RB(modencode)	1	1	24	5	0.0779703	0.341693	0.799079	12
CG6040.a(modencode)	0.626927	0.0190899	24	0	1.57105	0.00938325	0.554621	24
RhoGAPp190.b(modencode)	1	1	24	9	0	0.00941827	0.554955	8
ap-RC(modencode)	1	1	24	13	0	0.00943214	0.555087	48
swm.c(modencode)	1	1	24	15	0.463532	0.00958262	0.556497	8
RhoGAPp190.d(modencode)	1	1	24	9	0	0.00961732	0.556817	8
tko-RB(modencode)	1	1	24	15	0.0973686	0.00964831	0.557101	24
CG9485.a(modencode)	0.988158	0.0826246	24	17	1.26912	0.00966141	0.55722	24
RhoGAP71E.r(modencode)	1	1	24	15	0.628618	0.00970508	0.557617	48
CG8557.a(modencode)	1	1	24	13	0.179888	0.849145	0.872246	8
CG11660-RA(modencode)	1	1	24	9	0.089119	0.00982349	0.558678	48
CG11660-RB(modencode)	1	1	24	9	0.0925603	0.00982569	0.558697	48
swm-RB(modencode)	1	1	24	15	0.484486	0.00982705	0.558709	8
armi-RB(modencode)	1	1	24	15	0.0338468	0.00995295	0.559813	9
CG8557.b(modencode)	1	1	24	13	0.178379	0.782603	0.862873	8
armi.b(modencode)	1	1	24	15	0.0344597	0.00996737	0.559938	9
armi-RA(modencode)	1	1	24	15	0.0346482	0.00997236	0.559981	9
nc_21795.a(modencode)	1	1	24	13	0	0.00999428	0.56017	12
MCPH1-RB(modencode)	1	0.268421	24	20	0.225214	0.486067	0.814835	16
Mkk4.c(modencode)	1	0.915543	24	22	0.869176	0.101966	0.695024	16
Ptx1.c(modencode)	1	1	24	9	0.0234288	0.141497	0.731767	12
CG17528.i(modencode)	1	1	24	7	0.0259508	0.205693	0.766105	12
CG8525.b(modencode)	1	1	24	13	0	0.0101458	0.561458	8
CG8525-RA(modencode)	1	1	24	13	0	0.0101507	0.5615	8
CG8525.a(modencode)	1	1	24	13	0	0.0101511	0.561503	8
tio.e(modencode)	1	0.377215	24	16	0.405667	0.781574	0.862718	12
tio.b(modencode)	1	0.377215	24	16	0.405596	0.781576	0.862718	12
CG9855-RA(modencode)	1	1	24	13	0.191178	0.0101899	0.561828	16
CG9855.a(modencode)	1	1	24	13	0.208597	0.0101989	0.561902	16
CdGAPr-RC(modencode)	1	1	24	15	0.291564	0.010215	0.562036	8
RhoGAP71E.f(modencode)	1	1	24	13	0.337667	0.0102629	0.562432	48
CG14005-RA(modencode)	1	1	24	9	0	0.010343	0.563088	12
RhoGAPp190.a(modencode)	1	1	24	9	0	0.0103763	0.563357	8
AP-1gamma-RE(modencode)	1	1	24	7	0.0856071	0.0104236	0.563738	8
CG8974-RE(modencode)	1	1	24	9	0	0.0104655	0.564073	16
pygo-RA(modencode)	0.88744	0.0525464	24	11	0.168857	0.330908	0.797387	24
swm.d(modencode)	1	1	24	15	0.523094	0.0105108	0.564433	8
CG10590.a(modencode)	1	1	24	15	0.167207	0.0344234	0.64547	9
CG10590-RA(modencode)	1	1	24	15	0.186016	0.034434	0.645483	9
CG17528.k(modencode)	1	1	24	5	0.0268936	0.309061	0.793624	12
Atg6-RA(modencode)	1	1	24	9	0.339317	0.994097	0.888803	16
CG11909.a(modencode)	0.988158	0.0826246	24	16	31.043	0.0105875	0.565035	24
pyd-LD43161(modencode)	1	1	24	13	0	0.0106243	0.565321	8
drongo-RD(modencode)	1	1	24	9	0	0.0107278	0.566118	8
CG32062.k(modencode)	1	1	24	11	1.18695	0.0108106	0.566747	12
5-HT1B.a(modencode)	0.569132	0.0108197	24	16	0.97807	0.222404	0.772119	24
Actn.a(modencode)	0.88744	0.0525464	24	18	0.53931	0.273576	0.786334	48
AIF.a(modencode)	0.569132	0.0108197	24	18	0.797192	0.0673365	0.6668	24
Arf51F-RE(modencode)	0.569132	0.0108197	24	14	13.8589	0.0442352	0.654978	24
argos-RA(modencode)	1	0.915543	24	22	0.306531	0.344501	0.799504	24
bcn92-RA(modencode)	0.569132	0.0108197	24	12	4.22574	0.0663243	0.666449	24
Bmcp-RA(modencode)	0.569132	0.0108197	24	15	0.717537	0.0518114	0.659965	24
Ca-P60A.ae(modencode)	1	1	24	15	0	0.0762323	0.669898	48
CG10433.a(modencode)	0.569132	0.0108197	24	2	29.0619	0.222645	0.7722	24
CG10433-RA(modencode)	0.569132	0.0108197	24	2	27.2858	0.223645	0.772534	24
CG10747.a(modencode)	0.569132	0.0108197	24	17	0.707955	0.091863	0.681551	24
CG10747-RA(modencode)	0.569132	0.0108197	24	17	0.79995	0.0918481	0.68153	24
CG10962.a(modencode)	1	1	24	13	0	0.725694	0.853693	8
CG12003-RA(modencode)	1	1	24	13	0.102012	0.524016	0.817623	8
CG12567-RA(modencode)	0.569132	0.0108197	24	18	0.903046	0.0831453	0.674066	24
CG12567-RC(modencode)	0.569132	0.0108197	24	18	0.907147	0.0831487	0.674068	24
CG12567-RE(modencode)	0.569132	0.0108197	24	18	0.882328	0.0831425	0.674064	24
CG12567-RF(modencode)	0.569132	0.0108197	24	18	1.22329	0.0609851	0.664408	24
CG13792.a(modencode)	0.569132	0.0108197	24	6	1.07537	0.0340226	0.644972	24
CG1407-RA(modencode)	0.569132	0.0108197	24	16	0.632153	0.0673025	0.666788	24
CG14935.a(modencode)	0.569132	0.0108197	24	18	0.658953	0.0159301	0.599892	24
CG15343.a(modencode)	1	0.268421	24	18	0.503319	0.539132	0.818936	24
CG17646.b(modencode)	0.569132	0.0108197	24	5	1.10005	0.0694338	0.667497	24
CG17646-MIP21644(modencode)	0.569132	0.0108197	24	5	1.24154	0.0686225	0.667232	24
CG17646-MIP21876(modencode)	0.569132	0.0108197	24	4	1.17252	0.190587	0.75986	24
CG17746.b(modencode)	1	0.695705	24	16	0.822507	0.118509	0.71291	16
CG18537-RA(modencode)	0.569132	0.0108197	24	2	1.00239	0.0864645	0.676023	24
CG1889-RA(modencode)	0.569132	0.0108197	24	20	0.418537	0.023659	0.626805	24
CG1889-RB(modencode)	0.569132	0.0108197	24	21	0.418466	0.0350366	0.64621	24
CG1889-RC(modencode)	0.569132	0.0108197	24	21	0.386434	0.035041	0.646215	24
CG30015.b(modencode)	0.569132	0.0108197	24	18	0.726694	0.186511	0.758022	24
CG31300-RA(modencode)	0.569132	0.0108197	24	20	4.83329	0.0251832	0.630333	24
CG32195-RE21427(modencode)	0.569132	0.0108197	24	16	0.69551	0.0217071	0.621636	24
CG32306.a(modencode)	0.569132	0.0108197	24	16	0.219132	0.175195	0.752523	24
CG32354.a(modencode)	1	0.915543	24	9	0.0526087	0.058061	0.663139	48
CG32354-RA(modencode)	1	0.915543	24	9	0.0286378	0.050996	0.659496	48
CG32425.a(modencode)	0.569132	0.0108197	24	12	2.73693	0.0420385	0.653214	24
CG32425-RA(modencode)	0.569132	0.0108197	24	12	2.67138	0.0430129	0.654017	24
CG32549-RA(modencode)	1	0.268421	24	14	2.88111	0.392807	0.805906	8
CG32711-RA(modencode)	1	1	24	5	0	0.965151	0.885849	8
CG32758.e(modencode)	0.569132	0.0108197	24	8	0.830285	0.28044	0.787877	24
CG32758.f(modencode)	0.569132	0.0108197	24	8	0.833396	0.22224	0.772064	24
CG32758-RA(modencode)	0.569132	0.0108197	24	8	0.882469	0.222206	0.772053	24
CG33181.o(modencode)	0.569132	0.0108197	24	10	7.84606	0.0857353	0.675466	24
CG33181.p(modencode)	0.569132	0.0108197	24	10	7.64446	0.0837935	0.674424	24
CG33181-RC(modencode)	0.569132	0.0108197	24	10	8.19636	0.0905472	0.679619	24
CG33181-RF(modencode)	0.569132	0.0108197	24	10	8.07771	0.0757769	0.66963	24
CG33181-RG(modencode)	0.569132	0.0108197	24	10	7.85688	0.0754328	0.669482	24
CG34141-RB(modencode)	0.569132	0.0108197	24	22	0.242467	0.0489566	0.658259	24
CG34141-RD(modencode)	0.569132	0.0108197	24	22	0.234618	0.0489621	0.658262	24
CG34349-RB(modencode)	1	1	24	5	0	0.73269	0.854887	12
CG3552.a(modencode)	0.569132	0.0108197	24	10	0.541997	0.113521	0.707975	24
CG3552-RD(modencode)	0.569132	0.0108197	24	10	0.538462	0.113536	0.70799	24
CG42270.a(modencode)	0.569132	0.0108197	24	13	1.1458	0.0108534	0.567067	24
CG42270-RB(modencode)	0.569132	0.0108197	24	13	1.05062	0.0115438	0.571967	24
CG42330.n(modencode)	0.569132	0.0108197	24	6	0.539876	0.294547	0.790839	24
CG4565-RB(modencode)	0.569132	0.0108197	24	17	1.62345	0.0151565	0.595894	24
CG4630-RA(modencode)	1	1	24	15	0.211331	0.783633	0.863029	12
CG5793-IP15522(modencode)	1	0.695705	24	14	0	0.754621	0.858508	48
CG6834-RA(modencode)	0.569132	0.0108197	24	4	1.25441	0.0346292	0.645721	24
CG7197-RA(modencode)	1	1	24	15	0.0995606	0.27641	0.786979	9
CG9154-RA(modencode)	0.569132	0.0108197	24	11	1.21414	0.0482214	0.657788	24
chr3L_6780376_6780918.0(modencode)	0.569132	0.0108197	24	18	1.47	0.041598	0.652839	24
Clk.a(modencode)	0.569132	0.0108197	24	22	2.52062	0.154879	0.740902	24
Clk.b(modencode)	0.569132	0.0108197	24	22	2.48838	0.156289	0.741793	24
Clk-RA(modencode)	0.626927	0.0190899	24	22	2.78989	0.151937	0.738997	24
Clk-RD(modencode)	0.569132	0.0108197	24	22	2.76762	0.153486	0.740008	24
coro-RB(modencode)	1	1	24	13	0.167655	0.0832833	0.674142	24
cwo.f(modencode)	0.569132	0.0108197	24	10	1.93846	0.180263	0.755061	24
cwo.g(modencode)	0.569132	0.0108197	24	10	1.93995	0.180274	0.755066	24
DCAP-RK(modencode)	0.569132	0.0108197	24	17	1.89837	0.121614	0.715808	24
DCAP-RO(modencode)	0.569132	0.0108197	24	17	2.20646	0.125651	0.719395	24
Dcr-1-RA(modencode)	0.569132	0.0108197	24	18	0.12735	0.137325	0.728748	24
dgo-RA(modencode)	0.569132	0.0108197	24	5	0.420587	0.142765	0.732654	24
Eip55E-RA(modencode)	0.569132	0.0108197	24	16	0.447386	0.0471454	0.657074	24
elB-RB(modencode)	0.569132	0.0108197	24	0	0.149907	0.0711357	0.668033	24
fok.c(modencode)	0.569132	0.0108197	24	13	4.50774	0.0659045	0.6663	24
fru-RJ(modencode)	0.569132	0.0108197	24	6	1.72407	0.102412	0.695567	24
fru-RL(modencode)	0.569132	0.0108197	24	6	1.23326	0.100604	0.693337	24
fru-RM(modencode)	0.569132	0.0108197	24	6	1.61885	0.068517	0.667197	24
gammaCop-RC(modencode)	1	1	24	7	0.121905	0.790945	0.864123	9
Gclc-RB(modencode)	0.569132	0.0108197	24	0	2.40742	0.233764	0.775763	24
gol.b(modencode)	0.569132	0.0108197	24	8	4.88851	0.186878	0.75819	24
gol-RB(modencode)	0.569132	0.0108197	24	8	8.15754	0.209354	0.767496	24
gol-RD(modencode)	0.569132	0.0108197	24	8	8.04178	0.209354	0.767496	24
hipk.c(modencode)	0.569132	0.0108197	24	6	3.24993	0.0328134	0.643404	24
hipk.e(modencode)	0.569132	0.0108197	24	6	3.35451	0.0289422	0.637567	24
His2A:CG33823-RA(modencode)	1	0.268421	24	18	0.955513	0.964751	0.885807	24
His2A:CG33832-RA(modencode)	1	1	24	15	0.654781	0.389669	0.805536	48
Hydr2.d(modencode)	0.569132	0.0108197	24	15	4.52209	0.0183472	0.610463	24
Ino80-RA(modencode)	1	0.186301	24	1	0.287015	0.640222	0.837338	12
l(1)G0334-RB_l(1)G0334-RB(modencode)	0.569132	0.0108197	24	14	2.83875	0.040097	0.651503	24
l(1)G0334-RC_l(1)G0334-RC(modencode)	0.569132	0.0108197	24	14	2.80552	0.0406381	0.651995	24
l(3)neo38.p_l(3)neo38.p(modencode)	0.569132	0.0108197	24	6	1.59198	0.164198	0.746545	24
lox.a(modencode)	0.569132	0.0108197	24	16	0.994263	0.0378478	0.649315	24
LpR2.a(modencode)	0.569132	0.0108197	24	12	1.7037	0.0761364	0.669835	24
LpR2.b(modencode)	0.569132	0.0108197	24	12	1.65901	0.0867333	0.676252	24
LpR2.d(modencode)	0.569132	0.0108197	24	12	1.84894	0.0813785	0.673063	24
LpR2-RB(modencode)	0.569132	0.0108197	24	12	1.70858	0.112497	0.706916	24
LpR2-RC(modencode)	0.569132	0.0108197	24	12	1.3505	0.0545525	0.661443	24
LpR2-RF(modencode)	0.569132	0.0108197	24	12	1.67895	0.093096	0.683322	24
MESK2.f(modencode)	0.569132	0.0108197	24	10	2.12196	0.130307	0.723297	24
MESK2.s(modencode)	0.569132	0.0108197	24	10	2.93605	0.03375	0.644628	24
Mnt.d(modencode)	0.569132	0.0108197	24	8	4.74073	0.109211	0.70341	24
Mnt-RC(modencode)	0.569132	0.0108197	24	8	5.08947	0.0778799	0.670954	24
mub.o(modencode)	0.569132	0.0108197	24	8	15.5713	0.0335142	0.644326	24
nc_21656.a(modencode)	0.569132	0.0108197	24	10	0.328734	0.0444142	0.655114	24
nc_3837.a(modencode)	0.569132	0.0108197	24	18	1.84293	0.561795	0.821387	16
nc_6833.a(modencode)	0.569132	0.0108197	24	8	10.2274	0.541771	0.819231	9
noncoding_6835-SD22445(modencode)	0.569132	0.0108197	24	10	6.4829	0.201808	0.764579	24
nuf-RA(modencode)	1	1	24	15	0.542186	0.839939	0.871027	8
per.a(modencode)	0.569132	0.0108197	24	10	1.53605	0.0109141	0.567519	24
per-RA(modencode)	0.569132	0.0108197	24	10	1.50684	0.0121046	0.575966	24
ras-RB(modencode)	0.569132	0.0108197	24	18	0.980545	0.0288759	0.637455	24
rdgB-RF(modencode)	0.569132	0.0108197	24	18	0.0884591	0.0527195	0.660471	24
rdgB-RG(modencode)	0.569132	0.0108197	24	18	0.0895197	0.0527127	0.660467	24
sn.a(modencode)	0.569132	0.0108197	24	14	4.45774	0.0414177	0.652683	24
SPR.a(modencode)	0.569132	0.0108197	24	4	2.18432	0.0563323	0.662328	24
SPR.b(modencode)	0.569132	0.0108197	24	4	1.95982	0.0467404	0.656797	24
SPR.c(modencode)	0.569132	0.0108197	24	4	2.13037	0.0532679	0.660768	24
SPR-RA(modencode)	0.569132	0.0108197	24	4	1.99022	0.0493709	0.658518	24
tim.a(modencode)	0.569132	0.0108197	24	14	25.0198	0.0152025	0.596142	24
tim.d(modencode)	0.569132	0.0108197	24	14	23.4909	0.0153146	0.59674	24
tim.e(modencode)	0.569132	0.0108197	24	14	26.7156	0.0145104	0.592275	24
tim-RA(modencode)	0.569132	0.0108197	24	14	25.3078	0.0147985	0.593923	24
tim-RE(modencode)	0.569132	0.0108197	24	14	24.0938	0.014909	0.59454	24
tim-RF(modencode)	0.569132	0.0108197	24	14	23.7369	0.0149088	0.594539	24
tim-RG(modencode)	0.569132	0.0108197	24	14	24.91	0.015056	0.595349	24
tim-RH(modencode)	0.569132	0.0108197	24	14	25.1148	0.0147688	0.593755	24
Uhg5-RA(modencode)	0.569132	0.0108197	24	10	5.71526	0.205032	0.765848	24
Uhg5-RB(modencode)	0.569132	0.0108197	24	10	5.57801	0.205033	0.765849	24
wds.a(modencode)	0.569132	0.0108197	24	21	1.18391	0.088292	0.677558	24
chr3R_7153900_7155490.0(modencode)	1	1	24	13	0	0.0109512	0.567794	16
ImpL2.a(modencode)	1	0.915543	24	20	3.22568	0.819654	0.868255	8
CG8974-RB(modencode)	1	1	24	9	0	0.0110177	0.568281	16
Rbf-RA(modencode)	1	1	24	15	0.182858	0.0111269	0.569071	8
Rbf.a(modencode)	1	1	24	15	0.189222	0.011127	0.569072	8
Su(dx)-RB_Su(dx)-RB(modencode)	1	1	24	11	0	0.0111675	0.569361	12
CG8974-RA(modencode)	1	1	24	9	0	0.0111767	0.569427	16
Ptx1-RB(modencode)	1	1	24	5	0	0.118396	0.712802	12
Su(dx).a_Su(dx).a(modencode)	1	1	24	13	0	0.0112533	0.569969	12
AP-1gamma-RA(modencode)	1	1	24	7	0.0872098	0.0112712	0.570094	8
Eip63E-RC(modencode)	1	1	24	11	0.20598	0.0113053	0.570333	48
TotF-AT22150(modencode)	1	1	24	11	0.0868091	0.0113517	0.570655	8
CG5630-RB(modencode)	1	1	24	9	0.502164	0.0114754	0.571505	48
Syx13.a(modencode)	0.988158	0.0826246	24	14	1.91244	0.126131	0.719808	24
ap-RA(modencode)	1	1	24	15	0	0.0115814	0.57222	48
ap.c(modencode)	1	1	24	15	0	0.0115822	0.572225	48
CG7611-RA(modencode)	1	1	24	9	0.454693	0.0115995	0.572341	16
CG33205.d(modencode)	1	1	24	11	0.0413893	0.0116326	0.572561	8
Eip63E-RK(modencode)	1	1	24	11	0.221112	0.0116549	0.572709	48
CG10734-IP11711(modencode)	0.768651	0.0322818	24	4	0.346341	0.0116726	0.572826	8
ap.b(modencode)	1	1	24	15	0	0.0116845	0.572904	48
CG42257-RE(modencode)	1	1	24	11	0.0434164	0.0117121	0.573086	12
Cyp12d1-p-RA(modencode)	1	0.268421	24	16	18.8991	0.011742	0.573281	24
CG8974-RD(modencode)	1	1	24	9	0	0.0117892	0.573589	16
CG8223.a(modencode)	1	1	24	7	0.153678	0.0118107	0.573728	12
CG7224.d(modencode)	1	1	24	9	0	0.0118586	0.574037	48
AP-1gamma-RC(modencode)	1	1	24	7	0.0800209	0.0118619	0.574058	8
CG10462.d(modencode)	1	1	24	13	0	0.0118808	0.574179	24
CG10462.c(modencode)	1	1	24	13	0	0.0118813	0.574183	24
CG9911-RD(modencode)	1	1	24	7	0	0.011886	0.574213	8
RhoGAP71E.o(modencode)	1	1	24	15	0.481917	0.0119403	0.574654	48
chrX_531653_531971.0(modencode)	0.768651	0.0322818	24	6	1.11313	0.0120772	0.57575	24
Syx13-RA(modencode)	0.88744	0.0525464	24	14	1.57685	0.134115	0.726315	24
CG42339-RA(modencode)	0.988158	0.0826246	24	6	0.331138	0.431467	0.810051	24
Arf84F.a(modencode)	1	1	24	5	0	0.0121799	0.576559	16
ImpL2-RB(modencode)	1	0.915543	24	19	4.72955	0.78258	0.86287	8
Slbp-RA(modencode)	1	1	24	13	0.119713	0.229078	0.7743	9
CG32485-GH16843(modencode)	1	0.915543	24	18	0.337997	0.10779	0.701839	12
CG14898-RA(modencode)	1	1	24	11	0.544001	0.0124052	0.578294	24
SH3PX1-RA(modencode)	0.626927	0.0190899	24	12	0.731148	0.348978	0.800167	24
sty-RC(modencode)	1	1	24	9	2.56265	0.872852	0.875283	8
CG15630-RA(modencode)	1	1	24	15	0.726081	0.780741	0.862591	24
l(1)G0196-RJ_l(1)G0196-RJ(modencode)	1	1	24	11	0	0.373447	0.803527	8
S.a(modencode)	0.626927	0.0190899	24	10	6.65423	0.01253	0.579233	24
S.b(modencode)	0.626927	0.0190899	24	10	6.65161	0.0125301	0.579233	24
CG8223.b(modencode)	1	1	24	7	0.209209	0.0125497	0.57938	12
CG10462.f(modencode)	1	1	24	13	0	0.0125601	0.579457	24
ap.a(modencode)	1	1	24	15	0	0.0125653	0.579495	48
Pabp2.b(modencode)	1	1	24	15	0.160914	0.959893	0.885295	9
Hr46-RA(modencode)	1	1	24	15	0	0.0126164	0.579873	48
chr2L_17902827_17903063.0(modencode)	1	1	24	7	0	0.0126725	0.580286	16
CG10734-RA(modencode)	0.768651	0.0322818	24	4	0.387141	0.0126962	0.580459	8
Syx13.b(modencode)	0.988158	0.0826246	24	14	1.65746	0.141821	0.731995	24
RhoGAP71E.q(modencode)	1	1	24	15	0.781707	0.0127339	0.580733	48
CG15522-RA(modencode)	1	0.125882	24	12	0.571837	0.753795	0.858375	8
CG15382-RA(modencode)	1	1	24	7	0	0.0129406	0.582213	16
noncoding_19262-MIP13990(modencode)	1	1	24	7	0	0.0129645	0.582382	16
CG9485.b(modencode)	0.88744	0.0525464	24	16	1.12685	0.0129891	0.582555	24
CG30349-RA(modencode)	1	1	24	9	0	0.0130123	0.582718	16
SdhA-RC(modencode)	1	1	24	15	0.593239	0.0130772	0.58317	16
RhoGAP71E.m(modencode)	1	1	24	15	0.590081	0.013235	0.584254	48
AP-1gamma.e(modencode)	1	1	24	9	0.0428271	0.0132958	0.584666	8
CG4966-RA(modencode)	1	0.377215	24	0	0.74522	0.794029	0.864579	48
CG14619.c(modencode)	0.88744	0.0525464	24	16	1.59127	0.0133477	0.585015	8
RhoGAP71E.e(modencode)	1	1	24	15	1.0992	0.0135705	0.586488	48
RhoGAP71E.c(modencode)	1	1	24	15	1.0979	0.0135707	0.58649	48
AP-1gamma.g(modencode)	1	1	24	5	0.210411	0.0135783	0.586539	8
wun.a(modencode)	1	1	24	11	0.975548	0.0136759	0.587171	8
bbc-RA(modencode)	1	0.695705	24	16	3.41412	0.815808	0.867716	12
SdhA-RA(modencode)	1	1	24	15	0.567288	0.0138173	0.588073	16
CG10462.h(modencode)	1	1	24	11	0	0.0138397	0.588214	24
CG10462.i(modencode)	1	1	24	11	0	0.0138399	0.588216	24
SdhA-RB(modencode)	1	1	24	15	0.563517	0.0138774	0.588451	16
l(1)G0196-RK_l(1)G0196-RK(modencode)	1	1	24	5	0.233392	0.160515	0.744383	8
CG6701.a(modencode)	1	1	24	13	0.169635	0.851021	0.872492	16
nc_16091.a(modencode)	1	1	24	5	0.217907	0.013978	0.589079	9
lilli-RG(modencode)	1	1	24	9	0.80662	0.0141528	0.590151	12
CG10462.e(modencode)	1	1	24	9	0	0.0141751	0.590286	24
CG10462-RB(modencode)	1	1	24	9	0	0.014176	0.590291	24
CG10462.b(modencode)	1	1	24	9	0	0.0142086	0.590488	24
CG10462.a(modencode)	1	1	24	9	0	0.0142087	0.590489	24
Hs3st-A.a(modencode)	1	1	24	17	3.44005	0.0142681	0.590846	48
RhoGAP71E.d(modencode)	1	1	24	15	1.09965	0.0142849	0.590946	48
CG10462-RA(modencode)	1	1	24	9	0	0.0142879	0.590964	24
RhoGAP71E.n(modencode)	1	1	24	15	0.587394	0.0143728	0.591469	48
CG32647.f(modencode)	1	1	24	5	9.79569	0.01441	0.591688	9
CG11413-RA(modencode)	1	0.517903	24	12	0.896753	0.593637	0.826943	48
Kdm4B-IP18301(modencode)	1	1	24	5	0	0.0145511	0.592511	16
CG32647.g(modencode)	1	1	24	5	10.081	0.014629	0.59296	9
CG32647.c(modencode)	1	1	24	5	8.42989	0.0146395	0.59302	9
Eip63E-RL(modencode)	1	1	24	11	0.252437	0.0146701	0.593195	48
Graf-RA(modencode)	1	0.377215	24	0	1.16828	0.249759	0.780379	16
CG10462-RC(modencode)	1	1	24	9	0	0.014767	0.593745	24
CG32647.d(modencode)	1	1	24	5	8.66211	0.0148498	0.59421	9
nc_16330.a(modencode)	1	1	24	17	0	0.0148524	0.594225	48
CG5535-RB(modencode)	0.988158	0.0826246	24	16	0.967888	0.0148591	0.594262	24
CG5916.d(modencode)	1	0.125882	24	13	0.705056	0.015094	0.595556	24
CG42240-RA(modencode)	1	1	24	17	3.08751	0.401604	0.806916	9
CG32581-RB(modencode)	1	1	24	9	0	0.0151492	0.595855	48
Hr46.a(modencode)	1	1	24	15	0	0.0151893	0.596071	48
CG10543.k(modencode)	1	1	24	13	1.17342	0.0151953	0.596103	8
AP-1gamma.f(modencode)	1	1	24	9	0.0486489	0.0152493	0.596392	8
mRpS17-RA(modencode)	1	1	24	11	0.288382	0.015329	0.596816	9
sty.b(modencode)	1	1	24	9	2.79453	0.782565	0.862868	8
Hs3st-A.b(modencode)	1	1	24	17	3.53563	0.0155632	0.598039	48
Hs3st-A.d(modencode)	1	1	24	17	3.40547	0.0156143	0.598301	48
CG42324.k(modencode)	1	1	24	11	0.149459	0.371644	0.803294	12
CG12012.a(modencode)	1	1	24	11	0.347661	0.0156708	0.59859	16
CG12012-RB(modencode)	1	1	24	11	0.329535	0.0156756	0.598615	16
sty.a(modencode)	1	1	24	9	2.64804	0.776458	0.861938	8
CG14154-RA(modencode)	1	0.377215	24	1	0.688086	0.547768	0.819892	24
CG1518.a(modencode)	1	0.517903	24	18	1.06526	0.637987	0.836861	16
Graf.d(modencode)	1	0.695705	24	0	1.04829	0.240969	0.777911	16
CSN3.b(modencode)	1	1	24	17	0.789791	0.0157266	0.598873	8
Src64B-GM03914(modencode)	1	1	24	9	0.0132936	0.243891	0.77875	9
CSN3-RA(modencode)	1	1	24	17	0.86161	0.0157297	0.598889	8
CG8918.b(modencode)	1	1	24	9	0.782885	0.015731	0.598896	48
CG8918.d(modencode)	1	1	24	9	0.808435	0.0157365	0.598923	48
CG2865.h(modencode)	0.768651	0.0322818	24	6	1.99376	0.268413	0.785125	24
CG2865.n(modencode)	0.768651	0.0322818	24	6	1.99432	0.268411	0.785125	24
CG2865.o(modencode)	0.768651	0.0322818	24	6	1.97495	0.268413	0.785125	24
CG2865.r(modencode)	0.768651	0.0322818	24	6	1.99164	0.268423	0.785128	24
Prx2540-1-RA(modencode)	1	0.125882	24	15	2.63779	0.0157913	0.5992	24
lap-RD(modencode)	0.88744	0.0525464	24	6	4.71647	0.151467	0.738686	24
CG11504-RC(modencode)	1	1	24	11	4.16334e-16	0.0158158	0.599323	48
CG11504-RB(modencode)	1	1	24	11	0	0.0158162	0.599324	48
CG11504-RA(modencode)	1	1	24	11	3.88578e-16	0.0158166	0.599326	48
dlt-RA(modencode)	1	0.125882	24	5	0.0373352	0.400312	0.80677	24
CG33205-RI(modencode)	1	1	24	15	0	0.0158722	0.599604	8
nc_23930.a(modencode)	1	1	24	13	2.52953	0.949902	0.884228	16
RpL3-RE(modencode)	1	1	24	13	0.66765	0.0159596	0.600038	12
Graf-RC(modencode)	1	0.695705	24	0	1.05507	0.240983	0.777916	16
wun-RB(modencode)	1	1	24	11	0.858805	0.0159645	0.600062	48
GstS1.a(modencode)	1	0.186301	24	16	6.17226	0.0159982	0.600228	24
CG33205.a(modencode)	1	1	24	11	0	0.016022	0.600344	8
CG42324.j(modencode)	1	1	24	11	0.150472	0.371551	0.803282	12
CG10990.f(modencode)	1	1	24	9	0	0.0161587	0.601009	12
RpL3-RB(modencode)	1	1	24	13	0.671775	0.0161923	0.601171	12
CG7611.h(modencode)	1	1	24	15	0.768743	0.0161982	0.6012	16
CG10462.g(modencode)	1	1	24	11	0	0.0162652	0.601521	24
lap-RC(modencode)	0.88744	0.0525464	24	6	4.86666	0.158537	0.743186	24
CG2865.q(modencode)	0.88744	0.0525464	24	6	1.98294	0.27771	0.787271	24
CG2865.p(modencode)	0.88744	0.0525464	24	6	1.98358	0.277703	0.78727	24
CG2865.g(modencode)	0.88744	0.0525464	24	6	1.93479	0.277699	0.787269	24
CG2865.e(modencode)	0.88744	0.0525464	24	6	1.93528	0.277705	0.78727	24
CG2865.i(modencode)	0.88744	0.0525464	24	6	1.93111	0.277697	0.787268	24
CG2865.b(modencode)	0.88744	0.0525464	24	6	1.9292	0.277707	0.787271	24
RhoGAP71E.l(modencode)	1	1	24	15	0.723889	0.0163829	0.602079	48
CG32485-RA(modencode)	1	1	24	17	0.126266	0.0378712	0.649339	12
Eip63E-RB(modencode)	1	1	24	11	0.195916	0.0164243	0.602274	48
CG7611-RG(modencode)	1	1	24	17	0.513383	0.0164848	0.602557	16
PGRP-LC.d(modencode)	1	1	24	7	0.322676	0.0166382	0.603266	48
RpL3.a(modencode)	1	1	24	11	0.549941	0.0167181	0.603631	12
neuroligin.a(modencode)	1	1	24	7	0.0886948	0.0167212	0.603646	16
GstS1-RA(modencode)	1	0.186301	24	16	5.5254	0.0167465	0.60376	24
AP-1gamma.d(modencode)	1	1	24	9	0.0303349	0.0167587	0.603816	8
Eip63E-RG(modencode)	1	1	24	11	0.211001	0.0167939	0.603975	48
Graf.a(modencode)	1	0.377215	24	1	0.811546	0.274046	0.786442	16
chr2R_11200326_11200570.0(modencode)	1	1	24	5	4.08324	0.489343	0.81509	48
inx2.b(modencode)	1	0.915543	24	2	0.398478	0.73607	0.855457	8
CG5630.b(modencode)	1	1	24	9	0.412102	0.0169106	0.604499	48
CG8974-RC(modencode)	1	1	24	9	0	0.0169237	0.604557	16
Graf-RE(modencode)	1	0.517903	24	1	0.972908	0.286156	0.789109	16
synaptogyrin-RA(modencode)	1	0.517903	24	13	9.44334	0.539019	0.818923	16
CG32581-RA(modencode)	1	1	24	9	0	0.0170255	0.605008	48
CG17528-RC(modencode)	1	1	24	5	0.114811	0.440876	0.810956	12
CG30387-RH(modencode)	1	1	24	13	0.157756	0.017084	0.605265	9
Graf-RD(modencode)	1	0.377215	24	1	0.826961	0.274035	0.786439	16
inx2-RA(modencode)	1	0.915543	24	2	0.414695	0.730449	0.854507	8
Graf.b(modencode)	1	0.517903	24	1	0.927866	0.278925	0.787542	16
Su(dx).c_Su(dx).c(modencode)	1	1	24	11	0	0.0173355	0.606353	12
CG17528-RD(modencode)	1	1	24	5	0.0900854	0.322908	0.796065	12
CG17528.e(modencode)	1	1	24	5	0.0923246	0.322939	0.79607	12
CG10151-RC(modencode)	1	0.125882	24	15	0.31194	0.624638	0.833953	16
CG10543.i(modencode)	1	1	24	13	1.16795	0.0174874	0.606997	8
CG17528.a(modencode)	1	1	24	5	0.0876341	0.327535	0.796837	12
CG17528.b(modencode)	1	1	24	5	0.0942102	0.317199	0.795083	12
CG30419-RA(modencode)	1	0.915543	24	18	0.903753	0.0175945	0.607445	12
CG9485.d(modencode)	0.988158	0.0826246	24	16	1.19897	0.0176435	0.607648	24
CG9485-RC(modencode)	0.988158	0.0826246	24	16	1.21191	0.0176546	0.607694	24
CG4966-RC(modencode)	1	0.695705	24	0	1.01434	0.673843	0.844189	48
CG2865.m(modencode)	0.88744	0.0525464	24	6	2.21183	0.25064	0.780618	24
nc_20450.a(modencode)	1	1	24	11	0	0.0179418	0.608865	48
CG2865.j(modencode)	0.88744	0.0525464	24	6	2.2143	0.250638	0.780618	24
CG2865.a(modencode)	0.988158	0.0826246	24	5	2.19585	0.249088	0.780197	24
nc_23225.a(modencode)	1	1	24	7	0	0.0180514	0.609303	12
KCNQ-RC(modencode)	1	1	24	15	0.322064	0.0181048	0.609515	16
ftz-f1.d(modencode)	1	1	24	9	0	0.128288	0.721635	48
CG1888.a(modencode)	1	1	24	9	0	0.0182607	0.610127	16
CG7998.a(modencode)	1	0.915543	24	19	0.551473	0.771635	0.861195	24
CG2852.a(modencode)	0.626927	0.0190899	24	16	1.03004	0.0183678	0.610542	24
CG34054-RA(modencode)	1	1	24	15	0	0.794119	0.864593	8
Pli.a(modencode)	0.768651	0.0322818	24	16	1.44794	0.313803	0.794482	24
CG17361-RA(modencode)	0.988158	0.0826246	24	16	1.0859	0.018495	0.611029	24
CG7611-RB(modencode)	1	1	24	15	0.775013	0.0185332	0.611175	16
CG3999.a(modencode)	1	1	24	15	0	0.0185611	0.61128	48
CG33205-RH(modencode)	1	1	24	15	0	0.0186027	0.611438	8
CG33205-RF(modencode)	1	1	24	15	0	0.0186035	0.611441	8
mmd.f(modencode)	1	1	24	13	1.24064	0.018613	0.611477	48
mmd.i(modencode)	1	1	24	13	1.21707	0.0186256	0.611524	48
ttk.e(modencode)	1	1	24	11	0.615937	0.0186405	0.61158	48
CG2865.k(modencode)	1	0.186301	24	5	2.59317	0.359286	0.801635	48
nc_8670.a(modencode)	0.988158	0.0826246	24	17	1.79259	0.0187293	0.611912	24
CG10962-RA(modencode)	1	1	24	13	0	0.823983	0.868857	8
CG3287-RC(modencode)	1	1	24	13	0	0.0188062	0.612198	9
CG3287.b(modencode)	1	1	24	13	0	0.0188071	0.612201	9
ttk-RD(modencode)	1	1	24	13	0.283055	0.0188621	0.612404	48
ytr-RA(modencode)	0.626927	0.0190899	24	12	0.797404	0.0188659	0.612418	24
nc_14804.a(modencode)	1	1	24	13	0	0.0188682	0.612427	12
CG2865.d(modencode)	1	0.186301	24	5	2.52614	0.360517	0.801805	48
CG33205.c(modencode)	1	1	24	11	0	0.0189732	0.612811	8
Ptx1.b(modencode)	1	1	24	9	0.0612119	0.0727474	0.668519	12
Aats-asn-RA(modencode)	0.626927	0.0190899	24	14	0.544755	0.0249673	0.629857	24
Aats-thr.b(modencode)	0.626927	0.0190899	24	12	1.00529	0.211942	0.768453	24
acj6.a(modencode)	0.626927	0.0190899	24	13	3.63036	0.470222	0.813556	24
Adk1-RA(modencode)	0.626927	0.0190899	24	8	2.06199	0.122643	0.716741	24
Adk1-RB(modencode)	0.626927	0.0190899	24	9	1.84081	0.154217	0.740479	24
alph.c(modencode)	0.626927	0.0190899	24	12	5.6903	0.220034	0.771317	24
alpha-Man-IIb-RA(modencode)	0.626927	0.0190899	24	22	0.593545	0.381912	0.804595	24
alph-RA(modencode)	0.626927	0.0190899	24	12	6.06033	0.176497	0.753187	24
alph-RC(modencode)	0.626927	0.0190899	24	12	7.56583	0.184928	0.757288	24
alph-RD(modencode)	0.626927	0.0190899	24	12	6.88772	0.184933	0.757291	24
Arf51F.a(modencode)	0.626927	0.0190899	24	13	14.024	0.0421926	0.653343	24
Arf51F.b(modencode)	0.626927	0.0190899	24	13	13.818	0.0400834	0.65149	24
Atf-2-RC(modencode)	0.626927	0.0190899	24	9	0.596374	0.203876	0.765397	24
bdg-RC(modencode)	0.626927	0.0190899	24	18	0.614052	0.209727	0.767635	24
blp.a(modencode)	0.626927	0.0190899	24	16	0.507632	0.202037	0.76467	48
blp.b(modencode)	0.626927	0.0190899	24	16	0.567665	0.202016	0.764662	48
blp-RA(modencode)	0.626927	0.0190899	24	16	0.465135	0.202024	0.764665	48
Ca-P60A.ad(modencode)	1	1	24	15	0	0.0419026	0.653099	48
Ca-P60A-RH(modencode)	1	1	24	15	0	0.0251805	0.630327	48
CG10433-RB(modencode)	0.626927	0.0190899	24	2	27.7259	0.233308	0.775623	24
CG10669-RA(modencode)	0.626927	0.0190899	24	6	0.877237	0.0542208	0.661272	24
CG10669-RB(modencode)	0.626927	0.0190899	24	6	0.818335	0.0542213	0.661272	24
CG10777-RB(modencode)	0.626927	0.0190899	24	8	1.28686	0.0802761	0.672417	24
CG10809-RA(modencode)	0.626927	0.0190899	24	10	0.245578	0.0816323	0.67321	8
CG10809-RB(modencode)	0.626927	0.0190899	24	10	0.238295	0.0816301	0.673208	8
CG11406.a(modencode)	1	1	24	11	0.247723	0.0850285	0.675091	8
CG12038-RA(modencode)	0.626927	0.0190899	24	20	0.490025	0.186408	0.757974	24
CG13792-RA(modencode)	0.626927	0.0190899	24	6	1.21269	0.0331949	0.64391	24
CG14104-RB(modencode)	1	1	24	11	0	0.213241	0.768926	24
CG14213.a(modencode)	0.626927	0.0190899	24	14	0.630456	0.0453714	0.655827	24
CG14213.b(modencode)	0.626927	0.0190899	24	14	0.636962	0.0453811	0.655834	24
CG14213-RA(modencode)	0.626927	0.0190899	24	14	0.560594	0.0453664	0.655823	24
CG14213-RB(modencode)	0.626927	0.0190899	24	14	0.583151	0.045382	0.655834	24
CG14375.a(modencode)	0.626927	0.0190899	24	16	19.2303	0.0648282	0.66591	24
CG14375-RA(modencode)	0.626927	0.0190899	24	16	17.0573	0.0696382	0.667563	24
CG14882.a(modencode)	0.626927	0.0190899	24	18	1.08484	0.0453729	0.655828	24
CG15117.b(modencode)	0.626927	0.0190899	24	18	0.221607	0.0403734	0.651756	24
CG15522.b(modencode)	0.626927	0.0190899	24	12	0.902693	0.513226	0.816852	16
CG15639.a(modencode)	0.626927	0.0190899	24	10	2.56574	0.0681309	0.667069	24
CG1695.c(modencode)	0.626927	0.0190899	24	8	0.439396	0.0775091	0.67072	24
CG1695.e(modencode)	0.626927	0.0190899	24	8	0.436851	0.0846112	0.674868	24
CG1732.a(modencode)	0.626927	0.0190899	24	18	6.33568	0.262382	0.783659	24
CG1732.b(modencode)	0.626927	0.0190899	24	18	6.84911	0.254868	0.781743	24
CG1732-RA(modencode)	0.626927	0.0190899	24	18	7.3252	0.255319	0.781861	24
CG1732-RB(modencode)	0.626927	0.0190899	24	18	7.451	0.255322	0.781861	24
CG17528.d(modencode)	1	1	24	5	0.0822601	0.310809	0.793944	12
CG17646-RB(modencode)	0.626927	0.0190899	24	5	0.566322	0.0840395	0.674558	24
CG17777-RB(modencode)	0.626927	0.0190899	24	4	0.53924	0.809322	0.866797	16
CG2217.a(modencode)	0.626927	0.0190899	24	10	5.1256	0.0804188	0.672501	24
CG30015-RD(modencode)	0.626927	0.0190899	24	18	0.869176	0.210114	0.767779	24
CG3061.a(modencode)	0.626927	0.0190899	24	18	3.48406	0.281088	0.788019	24
CG3173-RA(modencode)	0.626927	0.0190899	24	21	0.1393	0.0593142	0.663698	24
CG3173-SD05534(modencode)	0.626927	0.0190899	24	22	0.122188	0.0725579	0.668463	24
CG31817.a(modencode)	0.626927	0.0190899	24	12	0.628547	0.0449288	0.655501	24
CG31817.b(modencode)	0.626927	0.0190899	24	12	0.606132	0.0449212	0.655495	24
CG31817-RA(modencode)	0.626927	0.0190899	24	12	0.632012	0.0445461	0.655214	24
CG32195-RA(modencode)	0.626927	0.0190899	24	16	1.72506	0.0715891	0.668172	24
CG32450-RA(modencode)	0.626927	0.0190899	24	3	3.53645	0.116131	0.710601	24
CG32706-RA(modencode)	0.626927	0.0190899	24	4	1.88691	0.19663	0.762461	24
CG3362-RA(modencode)	0.626927	0.0190899	24	22	0.186959	0.258582	0.782702	24
CG34318-RA(modencode)	0.626927	0.0190899	24	8	4.86737	0.0945026	0.685296	24
CG34318-RB(modencode)	0.626927	0.0190899	24	8	5.09881	0.0927601	0.682843	24
CG34349.c(modencode)	1	1	24	5	0.0290857	0.824023	0.868862	12
CG3566.b(modencode)	0.626927	0.0190899	24	14	2.47996	0.101283	0.694182	24
CG3634-RA(modencode)	0.626927	0.0190899	24	8	0.935502	0.101507	0.694459	24
CG3975-RA(modencode)	0.626927	0.0190899	24	9	0.840821	0.0819935	0.673417	24
CG5065.f(modencode)	0.626927	0.0190899	24	18	6.18245	0.382886	0.804715	24
CG5065.k(modencode)	0.626927	0.0190899	24	18	5.1167	0.359643	0.801684	24
CG5065.n(modencode)	0.626927	0.0190899	24	18	5.03849	0.358422	0.801515	24
CG5065.o(modencode)	0.626927	0.0190899	24	18	5.28647	0.35472	0.800994	24
CG5065-RC(modencode)	0.626927	0.0190899	24	18	5.44069	0.356889	0.8013	24
CG5181-RA(modencode)	1	1	24	17	0.0125629	0.885496	0.876845	8
CG5254-RA(modencode)	0.626927	0.0190899	24	20	0.92631	0.0304261	0.639967	24
CG5284-RB(modencode)	0.626927	0.0190899	24	0	1.45339	0.0516212	0.659857	24
CG5793.a(modencode)	1	0.695705	24	14	0	0.812455	0.867243	48
CG5793.b(modencode)	1	1	24	15	0	0.713184	0.851508	48
CG5793-RA(modencode)	1	0.517903	24	14	0	0.699886	0.849112	24
CG6527.a(modencode)	0.626927	0.0190899	24	2	0.345068	0.14378	0.733363	24
CG6928.a(modencode)	0.626927	0.0190899	24	20	0.543765	0.0246695	0.629188	24
CG7332-RA(modencode)	0.626927	0.0190899	24	14	1.23107	0.105065	0.698727	24
CG7943.a(modencode)	0.626927	0.0190899	24	13	0.403687	0.0859266	0.675566	24
CG7943-RA(modencode)	0.626927	0.0190899	24	13	0.470014	0.0873591	0.676782	24
CG7943-RB(modencode)	0.626927	0.0190899	24	13	0.401637	0.0858657	0.675534	24
CG7991-MIP23106(modencode)	0.626927	0.0190899	24	8	0.169281	0.145175	0.734365	24
CG8165-RA(modencode)	1	1	24	9	0.114221	0.0404497	0.651825	16
CG8455-RA(modencode)	0.626927	0.0190899	24	20	0.341108	0.511183	0.816708	24
CG8594.a(modencode)	0.626927	0.0190899	24	18	0.138734	0.190548	0.759843	24
CG8594-RA(modencode)	0.626927	0.0190899	24	18	0.181726	0.157265	0.742402	24
CG9328.e(modencode)	0.626927	0.0190899	24	14	3.80148	0.038793	0.650263	24
CG9328-FI14214(modencode)	0.626927	0.0190899	24	14	3.85734	0.0386029	0.650076	24
CG9953-RA(modencode)	1	0.186301	24	16	2.01335	0.845991	0.871831	8
chr2L_10785500_10786177.0(modencode)	0.626927	0.0190899	24	22	0.714531	0.0361563	0.647501	24
chr3R_24411607_24417155.0(modencode)	0.626927	0.0190899	24	17	0.200253	0.02793	0.635796	24
chrX_6759212_6759693.0(modencode)	1	1	24	9	0	0.835158	0.870384	12
CkIIbeta.g(modencode)	1	1	24	17	2.61769	0.849882	0.872343	48
Cnx99A.a(modencode)	0.626927	0.0190899	24	14	14.2859	0.174683	0.752259	24
Cnx99A.b(modencode)	0.626927	0.0190899	24	14	12.7794	0.174812	0.752326	24
Cnx99A.c(modencode)	0.626927	0.0190899	24	14	12.7749	0.175258	0.752555	24
Cnx99A-RA(modencode)	0.626927	0.0190899	24	14	13.7354	0.174237	0.752028	24
Cnx99A-RC(modencode)	0.626927	0.0190899	24	14	13.0908	0.180055	0.754959	24
Cnx99A-RD(modencode)	0.626927	0.0190899	24	14	14.348	0.167935	0.748653	24
Cyp4p3.a(modencode)	0.626927	0.0190899	24	18	0.626072	0.268165	0.785066	24
Cyp6d5.a(modencode)	0.626927	0.0190899	24	18	3.31626	0.0335197	0.644333	24
Cyp6d5-RA(modencode)	0.626927	0.0190899	24	18	3.06693	0.031922	0.642176	24
dbr.a(modencode)	0.626927	0.0190899	24	19	0.219132	0.15512	0.741056	24
dbr.d(modencode)	0.626927	0.0190899	24	19	0.187595	0.104389	0.697935	24
dbr-RB(modencode)	0.626927	0.0190899	24	19	0.219097	0.112976	0.707414	24
DCAP-RC(modencode)	0.626927	0.0190899	24	17	1.87412	0.134382	0.726521	24
DCAP-RF(modencode)	0.626927	0.0190899	24	17	1.77484	0.134246	0.726416	24
DCAP-SD16465(modencode)	0.626927	0.0190899	24	18	2.67852	0.104043	0.697526	24
disp-RA(modencode)	0.626927	0.0190899	24	20	0.850791	0.0793555	0.671864	24
dnd-RA(modencode)	0.626927	0.0190899	24	14	2.09926	0.029597	0.638654	24
DopEcR.b(modencode)	0.626927	0.0190899	24	12	5.54838	0.250306	0.780528	24
DopEcR.c(modencode)	0.626927	0.0190899	24	12	5.45505	0.24946	0.780298	24
DopEcR.d(modencode)	0.626927	0.0190899	24	12	5.59364	0.252136	0.78102	24
DopEcR.f(modencode)	0.626927	0.0190899	24	12	5.56154	0.25188	0.780951	24
DopEcR.g(modencode)	0.626927	0.0190899	24	12	5.50539	0.251153	0.780756	24
dpr9.a(modencode)	0.626927	0.0190899	24	10	2.57274	0.106847	0.700777	24
dpr9.b(modencode)	0.626927	0.0190899	24	10	2.5832	0.106984	0.700932	24
dpr9.c(modencode)	0.626927	0.0190899	24	10	1.99241	0.0710062	0.667993	24
dpr9.d(modencode)	0.626927	0.0190899	24	10	1.74542	0.0667455	0.666596	24
dpr9.e(modencode)	0.626927	0.0190899	24	10	1.7078	0.066951	0.666667	24
dpr9.f(modencode)	0.626927	0.0190899	24	10	1.94624	0.0711024	0.668023	24
dpr9-RA(modencode)	0.626927	0.0190899	24	10	2.58794	0.106972	0.700919	24
Drs-RA(modencode)	0.626927	0.0190899	24	13	4.32643	0.0352701	0.646485	24
Eip74EF-RA(modencode)	0.626927	0.0190899	24	6	0.570282	0.125397	0.719175	24
Eps-15.d(modencode)	0.626927	0.0190899	24	16	1.08315	0.332951	0.797716	24
Eps-15.f(modencode)	0.626927	0.0190899	24	16	1.26021	0.155117	0.741054	24
fok.b(modencode)	0.626927	0.0190899	24	13	4.57102	0.0703692	0.667795	24
fok.d(modencode)	0.626927	0.0190899	24	13	4.07131	0.0665112	0.666514	24
fok.e(modencode)	0.626927	0.0190899	24	13	3.62576	0.0673422	0.666802	24
fok-RA(modencode)	0.626927	0.0190899	24	13	6.56054	0.0926912	0.682745	24
ftz-f1.c(modencode)	0.626927	0.0190899	24	6	1.31762	0.0568736	0.662587	24
ftz-f1.f(modencode)	0.626927	0.0190899	24	6	1.42524	0.0568506	0.662576	24
ftz-f1-RA(modencode)	0.626927	0.0190899	24	6	1.48959	0.0590613	0.663587	24
fu2-RA(modencode)	1	1	24	13	0.19139	0.68643	0.846608	9
Gadd45-RA(modencode)	0.626927	0.0190899	24	8	0.201101	0.38454	0.804918	8
gammaCop-RB(modencode)	1	1	24	11	0.0985235	0.754854	0.858545	8
Gclc.a(modencode)	0.626927	0.0190899	24	0	2.52437	0.229798	0.774528	24
Gclc.b(modencode)	0.626927	0.0190899	24	0	2.37376	0.278386	0.787422	24
Gclc.c(modencode)	0.626927	0.0190899	24	0	2.3261	0.242523	0.77836	24
Gclc-RA(modencode)	0.626927	0.0190899	24	0	2.14338	0.542002	0.819257	24
gol.a(modencode)	0.626927	0.0190899	24	9	4.84425	0.196079	0.76223	24
gol-RC(modencode)	0.626927	0.0190899	24	8	5.08445	0.18787	0.758642	24
Grd.b(modencode)	0.626927	0.0190899	24	18	0.395414	0.0898971	0.678861	24
GV1-RA(modencode)	1	0.915543	24	12	0.714673	0.250501	0.780581	8
Ih.ab(modencode)	0.626927	0.0190899	24	10	3.97931	0.440888	0.810957	24
Ih.ac(modencode)	0.626927	0.0190899	24	10	3.99063	0.440887	0.810957	24
ImpL2.e(modencode)	1	1	24	17	1.72767	0.923396	0.8813	8
klett.a(modencode)	0.626927	0.0190899	24	9	2.66841	0.193328	0.761058	24
Klp64D-RA(modencode)	1	1	24	11	0.0470462	0.279409	0.787649	12
l(3)05822.c_l(3)05822.c(modencode)	0.626927	0.0190899	24	20	0.361049	0.188652	0.758996	24
l(3)neo38.o_l(3)neo38.o(modencode)	0.626927	0.0190899	24	6	1.69211	0.19195	0.76046	24
lig.f(modencode)	1	1	24	13	0.355698	0.0220525	0.622611	16
lig.j(modencode)	1	1	24	15	0.321804	0.0261507	0.632377	16
lig.m(modencode)	1	1	24	13	0.288052	0.0437733	0.654621	16
lig.r(modencode)	1	1	24	15	0.285483	0.0445427	0.655212	16
lig.s(modencode)	1	1	24	15	0.307403	0.0667488	0.666597	16
lig.t(modencode)	1	1	24	15	0.312046	0.039788	0.651216	16
lig.u(modencode)	1	1	24	15	0.307026	0.0667223	0.666588	16
lig.v(modencode)	1	1	24	13	0.32871	0.0397025	0.651136	16
lig.x(modencode)	1	1	24	13	0.339671	0.0258349	0.631725	16
lig.y(modencode)	1	1	24	11	0.192545	0.0474025	0.657247	16
lig-RF(modencode)	1	1	24	15	0.285718	0.0427991	0.653844	16
LpR2.c(modencode)	0.626927	0.0190899	24	11	1.80744	0.081931	0.673381	24
LpR2.e(modencode)	0.626927	0.0190899	24	12	1.71353	0.0817353	0.673269	24
LpR2-RA(modencode)	0.626927	0.0190899	24	12	1.32215	0.0896725	0.678681	24
LpR2-RD(modencode)	0.626927	0.0190899	24	12	2.6793	0.0715237	0.668152	24
LpR2-RE(modencode)	0.626927	0.0190899	24	12	1.31692	0.038455	0.649929	24
LpR2-RG(modencode)	0.626927	0.0190899	24	12	1.31989	0.0708458	0.667944	24
Marf-RA(modencode)	0.626927	0.0190899	24	6	0.871297	0.031722	0.641892	24
Marf-RB(modencode)	0.626927	0.0190899	24	6	0.7781	0.0249743	0.629873	24
Marf-RC(modencode)	0.626927	0.0190899	24	6	0.930411	0.0340128	0.64496	24
Mf.i(modencode)	1	1	24	15	0	0.405176	0.807314	8
Mf-MIP03096(modencode)	1	1	24	15	0	0.437941	0.810678	8
Mf-RI(modencode)	1	1	24	15	0	0.376374	0.803902	8
mir-281bS-RA(modencode)	0.626927	0.0190899	24	22	65.6818	0.032342	0.642763	24
Mnt.a(modencode)	0.626927	0.0190899	24	8	5.42407	0.123951	0.717909	24
Mnt.b(modencode)	0.626927	0.0190899	24	8	5.42407	0.124302	0.718218	24
Mnt.c(modencode)	0.626927	0.0190899	24	8	5.41729	0.124302	0.718219	24
Mnt.e(modencode)	0.626927	0.0190899	24	8	5.45745	0.114443	0.708915	24
Mnt.g(modencode)	0.626927	0.0190899	24	8	4.31286	0.13883	0.729855	24
Mnt.q(modencode)	0.88744	0.0525464	24	8	3.5984	0.123045	0.717102	24
Mnt-RA(modencode)	0.768651	0.0322818	24	8	5.27063	0.117894	0.71232	24
Mnt-RD(modencode)	0.626927	0.0190899	24	8	4.84927	0.0668631	0.666637	24
Mpcp.a(modencode)	0.626927	0.0190899	24	12	4.95371	0.0902	0.679102	24
Mpcp-RA(modencode)	0.626927	0.0190899	24	12	4.87437	0.0923166	0.682207	24
Mpcp-RB(modencode)	0.626927	0.0190899	24	12	4.97846	0.0901999	0.679102	24
mub.a(modencode)	0.626927	0.0190899	24	8	15.2212	0.0927866	0.682881	24
mub.l(modencode)	0.626927	0.0190899	24	8	13.274	0.0809169	0.672795	24
mub.n(modencode)	0.626927	0.0190899	24	8	16.431	0.081168	0.672941	24
mub.t(modencode)	0.626927	0.0190899	24	7	3.71857	0.0220216	0.622525	24
nc_13966.a(modencode)	0.626927	0.0190899	24	8	1.67917	0.0415526	0.6528	24
nc_2470.a(modencode)	0.626927	0.0190899	24	2	1.96349	0.19674	0.762507	24
nc_2470.b(modencode)	0.626927	0.0190899	24	2	1.91216	0.155877	0.741535	24
nc_4991.a(modencode)	0.626927	0.0190899	24	14	10.3747	0.148388	0.736611	24
NFAT-RC(modencode)	1	1	24	15	2.03541e-16	0.467809	0.813354	16
Pepck-RA(modencode)	1	1	24	15	7.10543e-15	0.245203	0.77912	8
Pepck-RB(modencode)	1	1	24	15	0	0.245962	0.779333	8
Pep-RA(modencode)	0.626927	0.0190899	24	2	4.09542	0.0380392	0.64951	24
Pep-RC(modencode)	0.626927	0.0190899	24	2	3.72263	0.0306586	0.640324	24
PICK1.b(modencode)	0.626927	0.0190899	24	8	0.103803	0.0545044	0.661418	24
psq.aa(modencode)	0.626927	0.0190899	24	8	10.9848	0.0361727	0.647519	24
psq.ab(modencode)	0.626927	0.0190899	24	8	10.0663	0.0413415	0.652617	24
psq.j(modencode)	0.626927	0.0190899	24	8	9.61587	0.0409987	0.652317	24
psq.m(modencode)	0.626927	0.0190899	24	8	10.48	0.0390165	0.650481	24
psq.o(modencode)	0.626927	0.0190899	24	8	10.5437	0.0390187	0.650483	24
psq.p(modencode)	0.626927	0.0190899	24	8	9.77823	0.0409948	0.652313	24
psq.u(modencode)	0.626927	0.0190899	24	8	9.95288	0.037942	0.649411	24
psq.v(modencode)	0.626927	0.0190899	24	8	13.8502	0.0500788	0.658952	24
psq.w(modencode)	0.626927	0.0190899	24	8	12.9847	0.0579265	0.663077	24
psq-RA(modencode)	0.626927	0.0190899	24	8	11.194	0.0379133	0.649382	24
psq-RB(modencode)	0.626927	0.0190899	24	8	10.9764	0.0379176	0.649386	24
psq-RC(modencode)	0.626927	0.0190899	24	8	11.6372	0.0341107	0.645083	24
Ptp4E.s(modencode)	0.626927	0.0190899	24	20	1.61348	0.0652982	0.666081	24
Pxn.a(modencode)	1	1	24	11	0.208219	0.601403	0.828718	12
rdgB-RB(modencode)	0.626927	0.0190899	24	18	0.103945	0.126147	0.719822	24
Rh50.a(modencode)	0.626927	0.0190899	24	18	1.68405	0.0962199	0.687643	24
Rh50-MIP15244(modencode)	0.626927	0.0190899	24	20	1.37094	0.0788088	0.671531	24
rin.g(modencode)	0.626927	0.0190899	24	11	1.61546	0.142634	0.732563	24
sage-IP14615(modencode)	1	0.186301	24	2	0	0.274182	0.786473	8
scf.a(modencode)	1	1	24	17	0.324138	0.671709	0.843772	8
scf-RA(modencode)	1	1	24	17	0.303443	0.671711	0.843772	8
scf-RB(modencode)	1	1	24	17	0.353742	0.673054	0.844035	8
sd.m(modencode)	1	1	24	11	0	0.0820251	0.673435	16
sd.o(modencode)	1	1	24	11	0	0.0792062	0.671774	16
sd.p(modencode)	1	1	24	11	0	0.0916526	0.681245	16
Sep4-RF(modencode)	0.626927	0.0190899	24	14	6.11336	0.359723	0.801695	24
shn-RD(modencode)	0.626927	0.0190899	24	4	1.00303	0.356295	0.801217	48
Shroom-RD(modencode)	0.626927	0.0190899	24	20	0.15825	0.255931	0.78202	24
snmRNA:430:CR33746-RA(modencode)	1	1	24	15	0	0.869388	0.874849	9
sn-RE(modencode)	0.626927	0.0190899	24	14	4.5735	0.0709395	0.667973	24
sn-RF(modencode)	0.626927	0.0190899	24	14	5.23464	0.0399133	0.651333	24
tacc.h(modencode)	1	1	24	9	0	0.725204	0.853609	16
tacc.i(modencode)	1	1	24	9	0	0.651568	0.839716	16
tacc.m(modencode)	1	1	24	11	0	0.690613	0.847395	16
tacc-RA(modencode)	1	1	24	9	0	0.745317	0.856994	16
tacc-RD(modencode)	1	1	24	11	0	0.708149	0.85061	16
Tsp97E.a(modencode)	0.626927	0.0190899	24	12	9.19324	0.179444	0.754659	24
Tsp97E.d(modencode)	0.626927	0.0190899	24	12	6.91466	0.179861	0.754864	24
Tsp97E.e(modencode)	0.626927	0.0190899	24	12	8.04956	0.1508	0.738243	24
Tsp97E.f(modencode)	0.626927	0.0190899	24	12	6.6234	0.178869	0.754376	24
Tsp97E-RA(modencode)	0.626927	0.0190899	24	12	11.0442	0.155734	0.741444	24
VAChT-RA(modencode)	0.626927	0.0190899	24	10	1.99567	0.0918398	0.681518	24
vir-1-RD(modencode)	1	1	24	13	0	0.183637	0.756682	8
Wsck.a(modencode)	0.988158	0.0826246	24	19	0.418324	0.0374374	0.648889	24
Wsck-RA(modencode)	0.988158	0.0826246	24	19	0.415673	0.0374398	0.648891	24
Zasp52.a(modencode)	1	0.695705	24	16	0.490449	0.851643	0.872573	12
Zasp52-RC(modencode)	1	1	24	15	0.3429	0.828138	0.869429	24
CG3287.e(modencode)	1	1	24	9	0.0648653	0.0191591	0.613481	9
nc_1718.a(modencode)	1	1	24	7	0.699918	0.0192113	0.613668	48
RpL3-RA(modencode)	1	1	24	11	0.550836	0.0193676	0.614221	12
RhoGAP71E-RC(modencode)	1	1	24	15	0.955443	0.0196278	0.615123	48
RhoGAP71E-RD(modencode)	1	1	24	15	0.896281	0.0197397	0.615505	48
Su(dx)-RC_Su(dx)-RC(modencode)	1	1	24	11	0	0.0197646	0.615589	12
Su(dx).f_Su(dx).f(modencode)	1	1	24	11	0	0.0197656	0.615593	12
ssp4.g(modencode)	1	1	24	5	0.0204825	0.0198556	0.615896	16
CG33205-RE(modencode)	1	1	24	15	0	0.019866	0.615931	8
CG2698-RA(modencode)	1	1	24	13	0	0.0199172	0.616102	48
CG8557-RB(modencode)	1	0.695705	24	19	0.0636043	0.960825	0.885394	8
CG2698-RB(modencode)	1	1	24	13	0	0.0200631	0.616587	48
mmd.l(modencode)	1	1	24	13	1.25702	0.020091	0.616678	48
mmd.k(modencode)	1	1	24	13	1.23515	0.0201023	0.616716	48
CG2852-RA(modencode)	0.988158	0.0826246	24	16	1.03718	0.0202038	0.617047	24
RhoGAP71E.g(modencode)	1	1	24	15	0.898026	0.0202675	0.617254	48
CG8866-RB(modencode)	1	1	24	7	0	0.458993	0.812598	48
CG8866.a(modencode)	1	1	24	7	0	0.458944	0.812594	48
ssp4-RD(modencode)	1	1	24	5	0.0426385	0.020307	0.617382	16
crb-RB(modencode)	1	0.125882	24	2	0.00905097	0.712221	0.851337	9
CG14199-RB(modencode)	1	1	24	17	0	0.678899	0.84517	8
CG2865.l(modencode)	1	0.125882	24	5	2.45713	0.321805	0.795877	48
CG8557.c(modencode)	1	0.915543	24	19	0.0760847	0.930741	0.882126	8
CG10151.a(modencode)	1	0.125882	24	16	0.476731	0.665098	0.842463	16
CG5916-RA(modencode)	0.988158	0.0826246	24	13	0.689783	0.0204472	0.617831	24
Cyp12d1-d-RA(modencode)	1	0.517903	24	18	13.4669	0.0204565	0.617861	24
chrX_1535554_1536485.0(modencode)	1	1	24	13	0	0.728929	0.854248	8
RhoGAP71E.i(modencode)	1	1	24	15	1.03789	0.0205002	0.618	48
RhoGAP71E.k(modencode)	1	1	24	15	1.03909	0.0205011	0.618003	48
Npc2h-RA(modencode)	1	1	24	17	0	0.0205308	0.618097	16
CG14441.b(modencode)	1	1	24	9	0.109743	0.165511	0.747295	8
Ptx1.d(modencode)	1	1	24	9	0.0510767	0.0558008	0.66207	12
CG33205-RB(modencode)	1	1	24	9	0	0.0206138	0.618359	8
CG6067-RA(modencode)	1	0.268421	24	15	0.631835	0.0206651	0.618519	8
otp-RE(modencode)	1	1	24	7	0.280721	0.266604	0.784692	9
ftz-f1.a(modencode)	1	1	24	9	0	0.12044	0.714727	48
Cyp6a2-RA(modencode)	1	1	24	11	0	0.0207783	0.618871	8
ttk-RF(modencode)	1	1	24	13	0.385137	0.0208671	0.619145	48
Su(dx).b_Su(dx).b(modencode)	1	1	24	11	0	0.0209243	0.619321	12
Taspase1.b(modencode)	1	0.125882	24	0	0.0500632	0.793069	0.864438	24
Ptx1.a(modencode)	1	1	24	9	0.0509117	0.055831	0.662084	12
CG4789.a(modencode)	1	1	24	17	0.103756	0.020974	0.619472	12
RhoGAP71E.a(modencode)	1	1	24	15	1.02057	0.0210018	0.619557	48
Eip63E-RA(modencode)	1	1	24	11	0.158274	0.0210541	0.619715	48
Eip63E-RI(modencode)	1	1	24	13	0	0.0210545	0.619717	48
RhoGAP71E.p(modencode)	1	1	24	17	0.698504	0.0210644	0.619747	48
CG7806-RA(modencode)	1	1	24	17	0.193889	0.0210806	0.619795	12
mmd.j(modencode)	1	1	24	13	1.14243	0.021139	0.619971	48
CG8223-RA(modencode)	1	1	24	9	0.123249	0.0211634	0.620044	12
CG17370-RB(modencode)	1	1	24	5	0.0174891	0.157549	0.742578	48
Mob4-RA(modencode)	1	0.695705	24	9	0.181868	0.572451	0.822478	48
CG42389-RD(modencode)	1	1	24	13	0	0.021324	0.620522	8
CG4433-RA(modencode)	1	1	24	9	0	0.021376	0.620676	48
CG33205.b(modencode)	1	1	24	11	0	0.0214631	0.620931	8
Mob4.b(modencode)	1	0.517903	24	9	0.295995	0.655867	0.840599	16
CG6523-RA(modencode)	1	0.915543	24	14	1.08414	0.288843	0.789673	16
Itp-r83A-RA(modencode)	1	0.695705	24	5	0.229527	0.128067	0.72145	8
RhoGAP71E.j(modencode)	1	1	24	15	1.02952	0.0216633	0.621511	48
Cbl-RA(modencode)	1	0.125882	24	20	0	0.0217014	0.62162	8
Graf-RB(modencode)	1	0.517903	24	1	1.10273	0.324548	0.796341	16
nc_12950.a(modencode)	1	0.695705	24	15	1.11161	0.884232	0.87669	24
CG13360-RA(modencode)	1	0.915543	24	14	0.97906	0.52158	0.817446	48
crb-RA(modencode)	1	0.125882	24	2	0.045467	0.697375	0.848651	9
Itp-r83A.a(modencode)	1	0.695705	24	8	0.226062	0.124073	0.718016	8
l(1)G0196.a_l(1)G0196.a(modencode)	1	1	24	13	0	0.496175	0.81561	8
CG4433-RB(modencode)	1	1	24	9	0	0.0219929	0.622445	48
l(1)G0196.b_l(1)G0196.b(modencode)	1	1	24	13	0	0.483486	0.814632	8
CG34353.f(modencode)	1	1	24	15	0.820197	0.0222245	0.623086	16
GstS1-RC(modencode)	1	0.125882	24	16	4.9955	0.0222896	0.623265	24
GstS1-RB(modencode)	1	0.125882	24	16	4.88611	0.0222903	0.623266	24
GstS1.b(modencode)	1	0.125882	24	16	4.44169	0.0222905	0.623267	24
GstS1.c(modencode)	1	0.125882	24	16	4.53192	0.0222906	0.623267	24
PGRP-LC.f(modencode)	1	1	24	7	0.333212	0.0223018	0.623298	48
CG13325.b(modencode)	0.768651	0.0322818	24	11	0.491156	0.0223478	0.623423	24
CG32850-RA(modencode)	1	1	24	15	0.473408	0.144895	0.734166	48
CG30387.a(modencode)	1	1	24	9	0.793303	0.0223966	0.623555	9
Mctp-RB(modencode)	1	0.517903	24	3	0.220228	0.769668	0.860889	8
Mmp1.a(modencode)	1	0.125882	24	20	0.70244	0.140295	0.730913	24
crb.a(modencode)	1	0.186301	24	2	0.0463155	0.700192	0.849168	9
CG31678-AT26765(modencode)	1	1	24	9	0.434965	0.0224799	0.62378	48
l(1)G0196.c_l(1)G0196.c(modencode)	1	1	24	13	0	0.480436	0.81439	8
CG31365-RA(modencode)	1	1	24	11	0.0272472	0.0226103	0.624129	8
Pph13-RA(modencode)	1	1	24	11	0.12669	0.0810312	0.672861	9
CG33205-RA(modencode)	1	1	24	11	0	0.022766	0.62454	8
CG9149-RA(modencode)	1	1	24	9	0	0.0228485	0.624756	8
CG40196-RD(modencode)	1	1	24	9	0.815601	0.022858	0.624781	48
CG10132.a(modencode)	1	1	24	7	0	0.592926	0.826779	48
lig.ae(modencode)	1	1	24	15	0.303113	0.0228901	0.624864	16
lig.d(modencode)	1	1	24	15	0.343041	0.0229009	0.624892	16
CG32647.h(modencode)	1	1	24	5	10.1846	0.0229088	0.624913	9
Pde1c-RF(modencode)	0.988158	0.0826246	24	6	2.36464	0.0229463	0.62501	24
dnc.k(modencode)	1	1	24	15	0	0.0229815	0.625101	12
CG5515-RA(modencode)	0.88744	0.0525464	24	16	1.53294	0.0230109	0.625177	24
CG5515.a(modencode)	0.88744	0.0525464	24	16	1.7008	0.0230144	0.625186	24
CG5515-RB(modencode)	0.88744	0.0525464	24	16	1.71664	0.0230155	0.625189	24
CG13283-RA(modencode)	1	0.186301	24	3	0.551755	0.296119	0.791153	16
CG5515.b(modencode)	0.88744	0.0525464	24	16	1.79662	0.0230159	0.62519	24
CG10553-RA(modencode)	0.88744	0.0525464	24	19	5.53113	0.0230781	0.62535	24
Cpr49Ag-RA(modencode)	1	1	24	15	0.00938095	0.946474	0.883858	9
sda.a(modencode)	1	1	24	13	0	0.0230994	0.625404	12
Taspase1.a(modencode)	1	0.186301	24	0	0.0130815	0.83608	0.870508	9
CG2225.b(modencode)	1	1	24	11	0	0.0231502	0.625534	16
Alh-RD(modencode)	1	1	24	5	0	0.0232134	0.625695	16
CG4789-RA(modencode)	1	1	24	17	0.132913	0.0232678	0.625832	12
yuri-RB(modencode)	1	1	24	7	0	0.927479	0.88176	9
mmd.c(modencode)	1	1	24	11	7.24136	0.0233846	0.626126	16
CG32647.e(modencode)	1	1	24	5	10.5312	0.0233871	0.626132	9
spir-RD(modencode)	1	1	24	11	1.44127	0.0233977	0.626159	24
CG8830-RA(modencode)	1	1	24	15	1.39003	0.0234164	0.626205	48
dnc.i(modencode)	1	1	24	9	0.322134	0.0235362	0.626503	12
RhoGAPp190.g(modencode)	1	1	24	9	0	0.0236232	0.626718	8
CG10435-RA(modencode)	1	1	24	13	0	0.0236262	0.626725	9
GM31309(modencode)	1	1	24	9	18.7446	0.0237019	0.62691	16
spir-SD10157(modencode)	1	1	24	11	1.45322	0.0237829	0.627107	24
spir.a(modencode)	1	1	24	11	1.4363	0.0237838	0.62711	24
Alh-RA(modencode)	1	1	24	7	0	0.0238178	0.627192	8
sals.c(modencode)	1	1	24	5	0.126195	0.0238301	0.627222	16
lig-RG(modencode)	1	1	24	15	0.327791	0.0238661	0.627309	16
CG9171-RC(modencode)	1	1	24	15	0.527596	0.635121	0.836245	48
primo-1-RB(modencode)	1	1	24	17	0.296631	0.0240085	0.62765	48
Rbp1-like-RA(modencode)	1	1	24	15	0.355368	0.0241893	0.628079	12
CG33205-RG(modencode)	1	1	24	9	0	0.0242279	0.628169	8
Uhg3-RB(modencode)	1	1	24	11	0	0.60008	0.828418	16
mRpL28.a(modencode)	1	1	24	13	0.213452	0.399898	0.806723	12
CG42389.b(modencode)	1	1	24	9	0.0830615	0.508576	0.816521	16
Nup358-RA(modencode)	1	1	24	13	1.39691	0.772074	0.861263	9
yuri.c(modencode)	1	1	24	11	0.0235231	0.950215	0.884262	12
yuri.b(modencode)	1	1	24	11	0.0233817	0.950132	0.884253	12
Arf84F.b(modencode)	1	1	24	5	0.0720542	0.0245296	0.628869	16
CG9149.a(modencode)	1	1	24	9	0	0.0245499	0.628916	8
Trc8-RA(modencode)	1	1	24	7	0.737418	0.0246194	0.629075	48
Trc8.a(modencode)	1	1	24	7	0.737206	0.0246224	0.629081	48
Trc8-RB(modencode)	1	1	24	7	0.729546	0.0246228	0.629082	48
Trc8-RD(modencode)	1	1	24	7	0.72238	0.0246233	0.629084	48
Trc8.b(modencode)	1	1	24	7	0.747553	0.0246239	0.629085	48
CG3632.c(modencode)	1	1	24	15	0.212839	0.228554	0.774133	24
CG30035-RA(modencode)	1	0.125882	24	20	33.1384	0.024818	0.629524	24
Shab-RC(modencode)	1	1	24	13	0.942055	0.0248822	0.629668	8
CG2225.c(modencode)	1	1	24	13	0	0.0249261	0.629766	16
CG14647.a(modencode)	1	1	24	15	0.225402	0.556225	0.820802	12
nc_22436.a(modencode)	1	1	24	9	0	0.0249816	0.629889	8
CG3632-RG(modencode)	1	1	24	15	0.229433	0.247565	0.779778	24
CG9609-RA(modencode)	1	1	24	9	0	0.0250089	0.62995	48
lig.ad(modencode)	1	1	24	15	0.3161	0.0250461	0.630032	16
CG2767-RA(modencode)	0.88744	0.0525464	24	20	1.02856	0.0251317	0.63022	24
CG2767-RB(modencode)	0.88744	0.0525464	24	20	0.991576	0.0251332	0.630224	24
lig.q(modencode)	1	1	24	15	0.317373	0.0251704	0.630305	16
lig-RE(modencode)	1	1	24	15	0.314144	0.0251739	0.630313	16
Itp-r83A.b(modencode)	1	0.915543	24	5	0.197424	0.158298	0.743039	8
CG11537.f(modencode)	1	1	24	5	0.526983	0.0254076	0.63082	12
CG11537.d(modencode)	1	1	24	5	0.537024	0.0254077	0.63082	12
RhoGAP71E.h(modencode)	1	1	24	15	1.14115	0.0254934	0.631004	48
CG17294-RA(modencode)	1	1	24	5	0	0.025494	0.631005	8
Npc2h-RB(modencode)	1	1	24	17	0	0.0256209	0.631275	16
dnc.z(modencode)	1	1	24	13	0	0.0256254	0.631285	12
mRpS25-RA(modencode)	1	0.377215	24	12	0.534078	0.699724	0.849083	12
Muc12Ea-RA(modencode)	1	1	24	7	4.4424	0.0257436	0.631534	24
Srp72-RA(modencode)	1	1	24	15	0.0653367	0.0257442	0.631535	16
Ca-P60A.r(modencode)	1	1	24	15	0	0.025747	0.631541	48
Ca-P60A.aa(modencode)	1	1	24	15	0	0.0257481	0.631544	48
lig.n(modencode)	1	1	24	15	0.35419	0.025769	0.631587	16
lig-RB(modencode)	1	1	24	15	0.316312	0.0258055	0.631664	16
lig.a(modencode)	1	1	24	15	0.316077	0.0258058	0.631664	16
lig.i(modencode)	1	1	24	15	0.316242	0.0258103	0.631674	16
ssp4-RF(modencode)	1	1	24	5	0.0747648	0.0632614	0.665319	16
Graf.c(modencode)	1	0.268421	24	1	0.966615	0.28628	0.789136	16
CG10289.a(modencode)	1	0.186301	24	5	2.1716	0.0259289	0.631921	8
RhoGAP71E.b(modencode)	1	1	24	15	1.27553	0.0259319	0.631927	8
CG11851-RA(modencode)	1	1	24	9	0	0.025932	0.631927	9
ens.af(modencode)	1	1	24	11	2.70296	0.0259736	0.632013	48
Ca-P60A.y(modencode)	1	1	24	15	0	0.0259765	0.632019	48
CG15803-MIP08605(modencode)	1	1	24	13	0.958766	0.0259899	0.632047	48
CG10543.g(modencode)	1	1	24	15	0.709912	0.0260978	0.632269	8
CG40196.d(modencode)	1	1	24	9	0.912073	0.0261031	0.63228	48
CG2225.a(modencode)	1	1	24	13	0	0.0261067	0.632287	16
CG2225.d(modencode)	1	1	24	13	0	0.026108	0.63229	16
Shab-RA(modencode)	1	1	24	11	1.7569	0.0261331	0.632341	8
CG33205-RC(modencode)	1	1	24	9	0	0.0261601	0.632396	8
CG3632.b(modencode)	1	1	24	15	0.213216	0.22859	0.774144	24
ens.am(modencode)	1	1	24	11	2.64465	0.02618	0.632437	48
CG14441.d(modencode)	1	1	24	9	0.147243	0.208575	0.767204	8
CG7611-RI(modencode)	1	1	24	13	0.312258	0.0264471	0.632976	16
CG32647-RA(modencode)	1	1	24	5	15.0054	0.0264483	0.632978	9
CG3632-RH(modencode)	1	1	24	15	0.233911	0.247572	0.77978	24
CG6051-RB(modencode)	1	1	24	11	0.185757	0.669821	0.8434	8
CG6783-RA(modencode)	1	0.125882	24	14	17.4575	0.0265625	0.633206	24
ssp4.n(modencode)	1	1	24	15	0.397276	0.0266214	0.633322	16
CG32712.a(modencode)	1	1	24	15	0	0.0266335	0.633346	12
Snap25-RA(modencode)	1	1	24	9	0	0.0266375	0.633354	9
CG34232.a(modencode)	1	0.915543	24	0	0.440669	0.865249	0.874325	9
CG14950-RB(modencode)	1	1	24	11	0.186818	0.0267932	0.63366	9
trem-RA(modencode)	1	1	24	13	0.031042	0.787089	0.863548	12
Su(dx).d_Su(dx).d(modencode)	1	1	24	11	0	0.0268827	0.633834	12
Lsp2-RA(modencode)	1	0.186301	24	17	39.3355	0.0699705	0.667669	24
CG9328-RB(modencode)	0.988158	0.0826246	24	14	3.48462	0.624109	0.833836	24
Rbp1-like.a(modencode)	1	1	24	15	0.532522	0.0269107	0.633888	12
CG9003.e(modencode)	1	0.915543	24	8	2.04644	0.735497	0.855361	16
CG18449-RA(modencode)	1	1	24	9	0.18809	0.0269611	0.633985	12
cib.b(modencode)	1	1	24	11	2.88575	0.204594	0.765678	48
laza-RA(modencode)	1	1	24	5	0	0.299758	0.791868	16
CG32647-RB(modencode)	1	1	24	5	15.4393	0.0270578	0.634172	9
CG6051.a(modencode)	1	1	24	11	0.192922	0.669729	0.843382	8
CG34353.a(modencode)	1	1	24	9	1.31362	0.0271284	0.634307	16
CG13430-RB(modencode)	1	1	24	13	0.3091	0.0271315	0.634313	8
Hr38-RB(modencode)	0.988158	0.0826246	24	6	0.415355	0.027231	0.634502	24
ssp4.c(modencode)	1	1	24	13	0.0775225	0.0273109	0.634653	16
AP-1gamma.b(modencode)	1	1	24	9	0.0156035	0.0273742	0.634772	8
lig.b(modencode)	1	1	24	11	0.221159	0.0273743	0.634772	16
RpL3-RE52161(modencode)	1	1	24	11	0.588643	0.0273951	0.634811	12
CG9339-RF(modencode)	1	1	24	17	1.52945	0.0274097	0.634838	48
Graf-RF(modencode)	1	0.517903	24	4	1.20654	0.376941	0.803973	16
lig.p(modencode)	1	1	24	15	0.331185	0.0274906	0.634989	16
lig.o(modencode)	1	1	24	15	0.330125	0.0274918	0.634992	16
CG15073.a(modencode)	1	1	24	11	0.269903	0.492602	0.81534	48
CG15073-RA(modencode)	1	1	24	11	0.258518	0.492612	0.81534	48
ens-RD(modencode)	1	1	24	11	2.68095	0.0275637	0.635125	48
cib.c(modencode)	1	1	24	9	2.788	0.167136	0.748209	48
CG9328.c(modencode)	1	0.125882	24	13	4.00116	0.617119	0.83227	24
Ufd1-like-RA(modencode)	0.768651	0.0322818	24	12	0.728886	0.0277633	0.635493	24
CG2258.o(modencode)	1	1	24	13	0.0560971	0.0277693	0.635503	16
Snap25.d(modencode)	1	1	24	9	0	0.0278869	0.635718	9
CG6758-RA(modencode)	1	0.695705	24	10	0.333472	0.406258	0.807433	12
CG33169-RA(modencode)	1	1	24	13	0.21654	0.17973	0.7548	9
aralar1-GH07418(modencode)	1	1	24	13	0	0.0279162	0.635771	48
Snap25.a(modencode)	1	1	24	7	3.5476	0.0279179	0.635774	9
CG11537.c(modencode)	1	1	24	5	0.530377	0.0279211	0.63578	12
ens.d(modencode)	1	1	24	11	2.51919	0.0279359	0.635806	48
CG10702-RB(modencode)	1	1	24	13	0.0467633	0.0279488	0.63583	12
CG10702.d(modencode)	1	1	24	13	0.0473526	0.0279537	0.635839	12
trx-RD(modencode)	1	0.915543	24	1	1.5789	0.577746	0.823219	48
CR41602-RA(modencode)	1	1	24	15	214.842	0.0359477	0.647266	9
lig.g(modencode)	1	1	24	13	0.312635	0.0280792	0.636064	16
CG31431.h(modencode)	1	1	24	15	0.133549	0.0280798	0.636065	12
lig.h(modencode)	1	1	24	13	0.312824	0.0280824	0.63607	16
ens.y(modencode)	1	1	24	11	2.47601	0.0281437	0.63618	48
CG7115.a(modencode)	1	0.517903	24	4	0.158109	0.672636	0.843953	12
CG7115-RA(modencode)	1	0.517903	24	4	0.154008	0.672658	0.843957	12
CG40196.b(modencode)	1	1	24	11	0.417806	0.0283154	0.636484	48
lig.ac(modencode)	1	1	24	11	0.240982	0.0283563	0.636556	16
ens.q(modencode)	1	1	24	11	2.08191	0.0283796	0.636597	48
CG3198-RA(modencode)	1	0.517903	24	6	0.575373	0.823063	0.868729	12
Drep-2.d(modencode)	1	1	24	15	1.47606	0.028428	0.636682	48
CG32647.a(modencode)	1	1	24	5	11.0136	0.0285695	0.636929	9
CG10565-RA(modencode)	1	1	24	5	0.165062	0.028695	0.637145	12
Drep-2.b(modencode)	1	1	24	15	1.52721	0.0286996	0.637153	48
CG2225-RB(modencode)	1	1	24	11	0	0.0287025	0.637158	16
bbc.f(modencode)	1	0.915543	24	14	3.2523	0.786842	0.863511	12
Snap25.b(modencode)	1	1	24	7	6.81217	0.0289577	0.637594	9
CG17528.f(modencode)	1	1	24	5	0.0911696	0.300082	0.79193	12
bbc.e(modencode)	1	0.915543	24	14	3.04335	0.764285	0.860047	12
Su(dx).e_Su(dx).e(modencode)	1	1	24	11	0	0.0291263	0.637877	12
CG30035-RB(modencode)	1	0.125882	24	20	49.0458	0.0291451	0.637909	24
nc_2316.a(modencode)	1	1	24	15	0.807705	0.0291659	0.637944	8
CG32647.b(modencode)	1	1	24	5	11.4253	0.0292439	0.638074	9
CG40127-RA(modencode)	1	1	24	13	1.04534	0.0293606	0.638267	16
CG3756-RA(modencode)	1	1	24	5	0	0.660579	0.841556	12
Snap25.c(modencode)	1	1	24	7	2.72778	0.0294304	0.638382	9
cib.i(modencode)	1	1	24	9	2.42941	0.146995	0.735648	48
ens.ag(modencode)	1	1	24	11	2.81365	0.0295416	0.638564	48
Trs23-RA(modencode)	1	1	24	13	0.139842	0.17694	0.753411	12
ens.ak(modencode)	1	1	24	11	2.96848	0.0296789	0.638787	48
ens.ai(modencode)	1	1	24	11	2.95302	0.0296796	0.638788	48
mod(mdg4)-IP17341_mod(mdg4)-IP17341(modencode)	1	1	24	9	0	0.0297041	0.638827	9
CG13827.f(modencode)	1	1	24	13	0	0.0297096	0.638836	16
CG8232.a(modencode)	1	1	24	15	0.07031	0.44565	0.811401	12
RpL3.c(modencode)	1	1	24	9	0.276219	0.0297758	0.638943	12
CG8232.b(modencode)	1	1	24	15	0.0679765	0.445911	0.811425	12
CG17167.d(modencode)	1	0.695705	24	14	0.31438	0.565231	0.821743	12
CG40196.c(modencode)	1	1	24	9	0.918673	0.0298381	0.639043	48
ens.ah(modencode)	1	1	24	11	2.78664	0.0298992	0.63914	48
Hsp67Bc-RA(modencode)	0.988158	0.0826246	24	19	0.287191	0.0300566	0.63939	24
ens.al(modencode)	1	1	24	11	2.69834	0.0300696	0.639411	48
Eip63E.e(modencode)	1	1	24	9	0.692328	0.0300956	0.639452	48
CG40196.a(modencode)	1	1	24	9	0.918697	0.0301248	0.639498	48
Drep-2.c(modencode)	1	1	24	15	1.07546	0.0301755	0.639577	48
ens.aj(modencode)	1	1	24	11	2.83154	0.0302572	0.639705	48
CG11710-RB(modencode)	1	0.125882	24	17	0.0181726	0.390331	0.805614	24
Uhg3-RC(modencode)	1	1	24	11	0	0.514188	0.81692	16
CG34353.h(modencode)	1	1	24	11	1.26961	0.030513	0.640101	16
ens.s(modencode)	1	1	24	11	2.0042	0.0305864	0.640214	48
CG2186.f(modencode)	1	1	24	7	0	0.0308084	0.640551	48
CG11050-RA(modencode)	1	0.125882	24	14	1.04468	0.322045	0.795918	24
Ca-P60A.ab(modencode)	1	1	24	13	0	0.0308987	0.640687	48
ens.x(modencode)	1	1	24	11	2.75609	0.0310152	0.640861	48
Drep-2.f(modencode)	1	1	24	15	1.19982	0.0310837	0.640963	48
px.b(modencode)	1	1	24	17	0.244942	0.031158	0.641073	12
chr2RHet_567653_568005.0(modencode)	1	0.695705	24	16	0.0461034	0.0313005	0.641282	9
CG34398-RD(modencode)	1	1	24	17	0.199828	0.690674	0.847407	48
ens.aa(modencode)	1	1	24	11	2.657	0.0313298	0.641325	48
rok-RA(modencode)	1	0.186301	24	7	0.556246	0.0313599	0.641369	24
fat2-RA(modencode)	1	1	24	5	0.212108	0.128851	0.722103	8
fat2-RB(modencode)	1	1	24	5	0.208125	0.128104	0.721481	8
CG1518-RA(modencode)	1	0.186301	24	18	0.854397	0.836131	0.870515	16
Rlc1-RB(modencode)	0.988158	0.0826246	24	14	1.07035	0.0313716	0.641386	24
CG30389-RC(modencode)	1	0.377215	24	8	0.280934	0.733743	0.855065	8
px.d(modencode)	1	1	24	17	0.196434	0.0315304	0.641617	12
CG11741-RA(modencode)	1	1	24	17	0.00631682	0.0315501	0.641645	16
ens.z(modencode)	1	1	24	11	2.76566	0.0315684	0.641672	48
ens.t(modencode)	1	1	24	11	2.76507	0.0315689	0.641672	48
ens.o(modencode)	1	1	24	11	2.77928	0.0315693	0.641673	48
Cyp28d1-RA(modencode)	0.88744	0.0525464	24	16	41.1749	0.0316534	0.641794	24
nc_22606.a(modencode)	1	0.915543	24	20	1.65357	0.529034	0.817981	12
cib.d(modencode)	1	1	24	9	2.95401	0.25533	0.781863	48
CG9766-RA(modencode)	1	1	24	15	0	0.255474	0.781901	8
CG9339.a(modencode)	1	1	24	17	1.6905	0.0317651	0.641954	48
ens.ad(modencode)	1	1	24	11	2.83227	0.0318316	0.642048	48
CG2225-RA(modencode)	1	1	24	13	0	0.0318684	0.642101	16
CG33993-RA(modencode)	1	1	24	13	0.0710642	0.133788	0.726062	48
CG10151-RB(modencode)	1	0.125882	24	15	0.365291	0.596078	0.827505	16
CG10151-RA(modencode)	1	0.125882	24	15	0.405455	0.596071	0.827504	16
px-RB(modencode)	1	1	24	17	0.210105	0.0319957	0.64228	12
CG30389-RA(modencode)	1	0.517903	24	8	0.224153	0.706851	0.850376	8
Drep-2.a(modencode)	1	1	24	15	1.3752	0.032084	0.642404	48
Eip75B-RD(modencode)	1	1	24	13	0.233911	0.0320989	0.642425	48
ens.p(modencode)	1	1	24	11	2.62476	0.0322012	0.642568	48
ens.ae(modencode)	1	1	24	11	2.6208	0.0322021	0.642569	48
ens.w(modencode)	1	1	24	11	2.65318	0.0322023	0.642569	48
CG10444-RA(modencode)	1	1	24	5	0.0642996	0.0322167	0.642589	48
5-HT1B-RC(modencode)	0.768651	0.0322818	24	16	1.05267	0.199051	0.763463	24
Actn-RA(modencode)	0.988158	0.0826246	24	17	0.315935	0.46078	0.812754	48
Adk1.a(modencode)	0.768651	0.0322818	24	9	2.41809	0.360593	0.801815	24
ana1.a(modencode)	0.768651	0.0322818	24	1	0.294086	0.0676975	0.666923	24
ana1-IP16240(modencode)	0.768651	0.0322818	24	1	0.311127	0.068584	0.66722	24
ana1-RA(modencode)	0.768651	0.0322818	24	1	0.290621	0.0676705	0.666914	24
asparagine-synthetase-RA(modencode)	1	0.517903	24	15	0.532062	0.92251	0.881199	16
bdg.a(modencode)	0.768651	0.0322818	24	18	0.697632	0.395625	0.806234	24
bdg-RB(modencode)	0.768651	0.0322818	24	18	0.697137	0.395556	0.806226	24
betaTub56D-RA(modencode)	0.768651	0.0322818	24	16	1.01809	0.223157	0.772371	24
betaTub56D-RB(modencode)	0.768651	0.0322818	24	16	0.584353	0.354428	0.800953	24
betaTub56D-RC(modencode)	0.768651	0.0322818	24	16	0.903329	0.297269	0.79138	24
betaTub56D-RD(modencode)	0.768651	0.0322818	24	16	0.790687	0.317725	0.795174	24
btz-RA(modencode)	0.768651	0.0322818	24	4	1.01647	0.0684679	0.667181	24
bwa.c(modencode)	0.768651	0.0322818	24	18	0.529128	0.132226	0.724836	24
c11_1-RA(modencode)	1	1	24	17	0	0.560301	0.821231	8
Ca-P60A.l(modencode)	1	0.695705	24	18	0.438477	0.538678	0.818885	9
Ca-P60A.m(modencode)	1	1	24	13	0	0.0833397	0.674174	48
Ca-P60A.o(modencode)	1	1	24	13	0	0.0829635	0.673964	48
Ca-P60A.s(modencode)	1	0.695705	24	18	0.134562	0.227371	0.773753	24
Ca-P60A.t(modencode)	1	0.695705	24	18	0.0998435	0.300769	0.792063	24
Ca-P60A.u(modencode)	1	0.695705	24	18	0.112996	0.292689	0.790464	24
Ca-P60A.v(modencode)	1	0.695705	24	18	0.0559321	0.247644	0.7798	24
Ca-P60A.w(modencode)	1	0.695705	24	18	0.123461	0.302303	0.792358	24
Ca-P60A.z(modencode)	1	1	24	13	0	0.0809629	0.672821	48
Ca-P60A-RB(modencode)	1	0.695705	24	18	0.277893	0.568974	0.822126	9
Ca-P60A-RD(modencode)	1	0.695705	24	18	0.478287	0.547507	0.819864	9
Ca-P60A-RE(modencode)	1	0.695705	24	18	0.510036	0.532014	0.818191	9
Ca-P60A-RG(modencode)	1	0.695705	24	18	0.458488	0.540872	0.819131	9
Cct2-RA(modencode)	0.768651	0.0322818	24	5	0.337219	0.139255	0.730164	24
CG10479.a(modencode)	0.768651	0.0322818	24	15	1.28693	0.0946536	0.685505	24
CG10479-RA(modencode)	0.768651	0.0322818	24	15	1.28884	0.0946483	0.685498	24
CG10673-RA(modencode)	1	0.915543	24	13	0.383181	0.246774	0.779559	9
CG10801-AT31917(modencode)	0.768651	0.0322818	24	1	0.52729	0.554819	0.820653	8
CG10801-RA(modencode)	0.768651	0.0322818	24	1	0.521774	0.554888	0.82066	8
CG10962-RB(modencode)	1	0.915543	24	20	0.0854892	0.541902	0.819246	8
CG11334-RA(modencode)	0.768651	0.0322818	24	16	1.28997	0.0729696	0.668584	24
CG11334-RB(modencode)	0.768651	0.0322818	24	16	1.28587	0.0979062	0.689882	24
CG11337-RB(modencode)	1	1	24	7	0.0961665	0.126143	0.719819	12
CG11539-IP06409(modencode)	1	1	24	5	0.150472	0.892433	0.877685	12
CG1161.a(modencode)	1	0.915543	24	14	0	0.524161	0.817633	12
CG11889-RA(modencode)	0.768651	0.0322818	24	21	1.79492	0.0491517	0.658381	24
CG12163.b(modencode)	1	1	24	13	2.35163	0.783399	0.862994	24
CG12163.c(modencode)	1	1	24	13	2.5774	0.781029	0.862635	24
CG12163-RB(modencode)	1	1	24	13	2.95481	0.759081	0.859222	24
CG12207.a(modencode)	0.768651	0.0322818	24	12	3.74031	0.303718	0.792628	24
CG12207.b(modencode)	0.768651	0.0322818	24	12	3.77602	0.307775	0.793387	24
CG12207.c(modencode)	0.768651	0.0322818	24	12	3.50647	0.238075	0.777063	24
CG12207-RA(modencode)	0.768651	0.0322818	24	12	3.46129	0.357933	0.801446	24
CG12207-RC(modencode)	0.768651	0.0322818	24	12	3.86674	0.311348	0.794041	24
CG12567-RD(modencode)	0.768651	0.0322818	24	18	0.883035	0.063519	0.665418	24
CG12991.a(modencode)	0.768651	0.0322818	24	0	5.24603	0.163644	0.746225	24
CG12991-RA(modencode)	0.768651	0.0322818	24	0	5.86715	0.160039	0.744097	24
CG13284-MIP22165(modencode)	0.768651	0.0322818	24	6	0.4179	0.967681	0.886113	8
CG13624.a(modencode)	0.768651	0.0322818	24	10	1.77364	0.0483509	0.657872	24
CG1399.d(modencode)	0.768651	0.0322818	24	2	0.0610233	0.356482	0.801243	24
CG14213.c(modencode)	0.768651	0.0322818	24	14	0.47157	0.0589438	0.663535	24
CG14213.d(modencode)	0.768651	0.0322818	24	14	0.488681	0.0589431	0.663534	24
CG14375.b(modencode)	0.768651	0.0322818	24	16	16.6346	0.0679949	0.667023	24
CG14408-RB(modencode)	0.768651	0.0322818	24	12	1.67422	0.356371	0.801228	24
CG14521-RA(modencode)	0.768651	0.0322818	24	7	0.969479	0.117749	0.71218	24
CG14527-RA(modencode)	1	1	24	15	0.0475176	0.970507	0.886407	9
CG14805-RA(modencode)	1	1	24	11	0.0907925	0.114012	0.708477	12
CG14882.b(modencode)	0.768651	0.0322818	24	17	1.07247	0.0931051	0.683335	24
CG14882-RA(modencode)	0.768651	0.0322818	24	17	1.03075	0.0992342	0.691601	24
CG15760.a(modencode)	1	0.268421	24	11	0.245543	0.388664	0.805416	24
CG16753-RA(modencode)	1	0.517903	24	15	3.33067e-16	0.925953	0.881589	8
CG1695.f(modencode)	0.768651	0.0322818	24	8	0.789909	0.0502581	0.65906	24
CG1695.g(modencode)	0.768651	0.0322818	24	8	0.785596	0.0493755	0.658521	24
CG17292-RB(modencode)	1	1	24	15	0	0.99736	0.889126	9
CG17528.m(modencode)	1	1	24	9	0.0345304	0.378025	0.80411	12
CG17528.n(modencode)	1	1	24	9	0.0344125	0.364761	0.802383	12
CG17528.o(modencode)	1	1	24	9	0.0336111	0.342818	0.79925	12
CG17528.p(modencode)	1	1	24	7	0.0451606	0.374208	0.803625	12
CG17528.q(modencode)	1	1	24	7	0.0273179	0.483529	0.814635	12
CG17528.r(modencode)	1	1	24	7	0.0444063	0.374231	0.803628	12
CG17650-RA(modencode)	1	1	24	9	0	0.141939	0.732078	9
CG2059-RA(modencode)	1	1	24	13	0.121693	0.537612	0.818765	16
CG2135-RA(modencode)	1	1	24	15	0.208573	0.26465	0.784217	12
CG2680-RB(modencode)	0.768651	0.0322818	24	4	0.65471	0.0602924	0.664118	24
CG3011-RA(modencode)	0.768651	0.0322818	24	14	0.112571	0.142231	0.732282	8
CG3011-RB(modencode)	0.768651	0.0322818	24	14	0.360837	0.0339305	0.644857	8
CG31156.a(modencode)	0.768651	0.0322818	24	0	0.382474	0.130594	0.723529	8
CG31156-RA(modencode)	0.768651	0.0322818	24	0	0.288712	0.0956361	0.686853	8
CG31158-RG(modencode)	0.768651	0.0322818	24	0	0	0.0660749	0.66636	24
CG32132-RA(modencode)	0.768651	0.0322818	24	12	31.2218	0.0579232	0.663076	24
CG32299-RA(modencode)	0.768651	0.0322818	24	10	0.936846	0.0473572	0.657217	24
CG32364-RA(modencode)	1	1	24	15	0.206122	0.417133	0.808599	9
CG32368-RA(modencode)	0.768651	0.0322818	24	4	0	0.511835	0.816754	9
CG32663-RA(modencode)	0.768651	0.0322818	24	6	0.500137	0.228189	0.774016	48
CG32690.a(modencode)	0.768651	0.0322818	24	17	0.175504	0.089163	0.67827	24
CG32711.a(modencode)	1	0.915543	24	2	0.379221	0.997772	0.889167	8
CG33052-RA(modencode)	1	1	24	11	0.108376	0.266877	0.784758	12
CG33230-RA(modencode)	0.988158	0.0826246	24	10	0.355816	0.152795	0.739559	24
CG3409-RA(modencode)	0.768651	0.0322818	24	10	1.51978	0.117445	0.711886	24
CG34250.a(modencode)	1	1	24	11	2.22045e-16	0.449121	0.811719	12
CG34349.b(modencode)	1	1	24	5	0.00148492	0.79933	0.865356	12
CG34349.d(modencode)	1	1	24	5	0	0.552148	0.820367	12
CG34349.e(modencode)	1	1	24	5	0	0.699552	0.849051	12
CG34353.g(modencode)	0.768651	0.0322818	24	20	1.20364	0.334575	0.797974	16
CG34415-RC(modencode)	0.768651	0.0322818	24	12	0.587959	0.313697	0.794464	24
CG34417.a(modencode)	1	0.695705	24	11	0.677833	0.992407	0.888635	48
CG3529.b(modencode)	0.768651	0.0322818	24	16	0.523683	0.0827219	0.673829	24
CG3609-RA(modencode)	1	0.695705	24	17	1.04044	0.890416	0.877442	12
CG3645-MIP22167(modencode)	0.768651	0.0322818	24	1	0.118016	0.248727	0.780098	24
CG42322.e(modencode)	0.768651	0.0322818	24	10	0.868186	0.194222	0.761442	24
CG4497.a(modencode)	0.768651	0.0322818	24	10	0.356099	0.119165	0.713533	8
CG4660-RA(modencode)	0.768651	0.0322818	24	12	10.692	0.106057	0.699875	24
CG4877.a(modencode)	1	1	24	13	0	0.533456	0.818292	48
CG4877.b(modencode)	1	1	24	13	0	0.5333	0.818281	48
CG4877.c(modencode)	1	1	24	13	0	0.533517	0.818299	48
CG4877.d(modencode)	1	1	24	13	0	0.514639	0.816952	48
CG4877.e(modencode)	1	1	24	13	0	0.515219	0.816992	48
CG4877.f(modencode)	1	1	24	13	0	0.533297	0.818281	48
CG4877-RA(modencode)	1	1	24	13	0	0.515077	0.816982	48
CG4877-RB(modencode)	1	1	24	13	0	0.533409	0.818288	48
CG4933-RA(modencode)	0.768651	0.0322818	24	21	4.81702	0.264336	0.78414	24
CG5065.g(modencode)	0.768651	0.0322818	24	18	4.66061	0.228451	0.7741	24
CG5065.h(modencode)	0.768651	0.0322818	24	17	3.68198	0.214918	0.769529	24
CG5065.i(modencode)	0.768651	0.0322818	24	18	5.22552	0.235512	0.776295	24
CG5065.j(modencode)	0.768651	0.0322818	24	18	5.2002	0.35108	0.800473	24
CG5065.l(modencode)	0.768651	0.0322818	24	18	5.28838	0.382159	0.804626	24
CG5065.m(modencode)	0.768651	0.0322818	24	18	4.89629	0.334547	0.79797	24
CG5130-RB(modencode)	1	0.517903	24	20	0	0.363472	0.802208	8
CG5284-RA(modencode)	0.768651	0.0322818	24	0	1.23213	0.0748195	0.669216	24
CG5284-RE11344(modencode)	0.768651	0.0322818	24	0	1.2443	0.0775652	0.670755	24
CG5359-RB(modencode)	1	0.915543	24	9	0	0.918333	0.880723	8
CG5867-RA(modencode)	1	1	24	17	0	0.691326	0.847529	9
CG5895-RA(modencode)	1	1	24	13	0	0.864667	0.874251	12
CG6928-RB(modencode)	0.768651	0.0322818	24	20	0.474822	0.0456804	0.65605	24
CG6999-RA(modencode)	0.768651	0.0322818	24	4	1.70646	0.319473	0.795477	24
CG7168-RA(modencode)	1	0.186301	24	10	0.556705	0.790606	0.864073	24
CG7603.a(modencode)	0.768651	0.0322818	24	12	0.207112	0.155925	0.741564	24
CG7603-RA(modencode)	0.768651	0.0322818	24	14	0.25272	0.136918	0.728445	24
CG7694-RB(modencode)	0.768651	0.0322818	24	1	1.26098	0.034249	0.645255	24
CG8179-RA(modencode)	0.768651	0.0322818	24	7	6.86739	0.0913487	0.680801	24
CG8455.a(modencode)	0.768651	0.0322818	24	20	0.359705	0.455838	0.812321	24
CG8455-RB(modencode)	0.768651	0.0322818	24	20	0.358645	0.455811	0.812319	24
CG9664-RC(modencode)	1	0.186301	24	19	0.258624	0.0857494	0.675473	24
CG9902.b(modencode)	0.768651	0.0322818	24	2	0	0.216387	0.77005	24
CG9902.c(modencode)	0.768651	0.0322818	24	2	0	0.180378	0.755117	24
CG9948.b(modencode)	1	1	24	13	0.996643	0.484159	0.814685	48
CG9948-RA(modencode)	1	1	24	13	0.969396	0.484165	0.814686	48
chrX_1532359_1533289.0(modencode)	0.768651	0.0322818	24	4	0.405879	0.158151	0.742949	24
CoRest-RA(modencode)	0.768651	0.0322818	24	10	0.996808	0.171602	0.750643	24
CoRest-RC(modencode)	0.768651	0.0322818	24	10	1.15994	0.165652	0.747375	24
CoRest-RD(modencode)	0.768651	0.0322818	24	10	1.00685	0.173096	0.751433	24
Cpr11B.a(modencode)	1	0.268421	24	2	0.315912	0.316893	0.795029	8
Cpr11B-RA(modencode)	1	0.125882	24	1	0.278812	0.267692	0.784953	24
Csp-SD02108(modencode)	1	0.377215	24	18	8.24091	0.147664	0.736112	8
csul.a(modencode)	0.768651	0.0322818	24	7	0.122329	0.18489	0.757271	24
csul-RA(modencode)	0.768651	0.0322818	24	7	0.413905	0.104814	0.698435	24
csul-RB(modencode)	0.768651	0.0322818	24	7	0.12088	0.184914	0.757282	24
Cyp4p3-RA(modencode)	0.768651	0.0322818	24	18	0.543129	0.337519	0.798436	24
Cys-RA(modencode)	1	1	24	15	26.7445	0.971228	0.886482	8
dbr.c(modencode)	0.768651	0.0322818	24	19	0.11837	0.182883	0.756324	24
DCAP-RB(modencode)	0.768651	0.0322818	24	18	1.24133	0.104438	0.697993	24
DCAP-RH(modencode)	0.768651	0.0322818	24	17	2.76267	0.0866965	0.676221	24
DCAP-RI(modencode)	0.768651	0.0322818	24	17	2.64387	0.0955575	0.686746	24
DCAP-RJ(modencode)	0.768651	0.0322818	24	17	2.74435	0.091016	0.680313	24
DCAP-RN(modencode)	0.768651	0.0322818	24	16	2.5248	0.127927	0.721332	24
Dgk-RC(modencode)	0.768651	0.0322818	24	8	0.845841	0.201614	0.764501	24
DopEcR.e(modencode)	0.768651	0.0322818	24	12	5.46077	0.256917	0.782275	24
ect-RD(modencode)	1	1	24	9	0.0670573	0.582695	0.824377	12
ERp60-RA(modencode)	0.88744	0.0525464	24	18	3.74208	0.111155	0.705505	24
ex-RA(modencode)	0.768651	0.0322818	24	6	0.921007	0.0495265	0.658614	24
Fer1HCH.a(modencode)	0.768651	0.0322818	24	12	40.6458	0.554076	0.820573	24
Fer1HCH.b(modencode)	0.768651	0.0322818	24	12	42.3801	0.547931	0.81991	24
Fer1HCH-RA(modencode)	0.768651	0.0322818	24	12	31.5159	0.517596	0.817158	24
Fer1HCH-RB(modencode)	0.768651	0.0322818	24	12	36.469	0.520405	0.817361	24
Fer1HCH-RC(modencode)	0.768651	0.0322818	24	12	34.3841	0.52388	0.817613	24
Fer1HCH-RD(modencode)	0.768651	0.0322818	24	12	35.1745	0.519807	0.817317	24
Fer1HCH-RE(modencode)	0.768651	0.0322818	24	12	35.1985	0.520404	0.817361	24
fok.a(modencode)	0.768651	0.0322818	24	13	6.81913	0.0971336	0.688864	24
fru-RN(modencode)	0.768651	0.0322818	24	6	1.52162	0.117774	0.712204	48
ftz-f1.e(modencode)	0.768651	0.0322818	24	6	1.70639	0.118712	0.713103	24
GV1.a(modencode)	1	0.695705	24	12	1.00487	0.400535	0.806795	48
GV1.c(modencode)	1	0.915543	24	12	0.817415	0.24906	0.780189	8
hts.d(modencode)	0.768651	0.0322818	24	4	0.839619	0.391289	0.805728	24
ImpL2.c(modencode)	1	1	24	17	1.53918	0.924588	0.881435	8
ImpL2.d(modencode)	1	1	24	17	1.4239	0.929502	0.881987	8
Imp-RI(modencode)	1	1	24	13	0	0.825111	0.869012	12
jim.a(modencode)	0.768651	0.0322818	24	10	1.04228	0.452399	0.812015	24
klett.f(modencode)	0.768651	0.0322818	24	8	0.89046	0.302701	0.792434	24
klett-RB(modencode)	0.768651	0.0322818	24	8	0.88954	0.302747	0.792443	24
klett-RE(modencode)	0.768651	0.0322818	24	8	0.804829	0.342006	0.799127	24
klett-RF(modencode)	0.768651	0.0322818	24	8	0.941018	0.306642	0.793177	24
klett-RI(modencode)	0.768651	0.0322818	24	8	0.90446	0.314741	0.794649	24
l(1)G0289-RA_l(1)G0289-RA(modencode)	0.768651	0.0322818	24	8	3.28967	0.102291	0.69542	24
l(2)k05819-RA_l(2)k05819-RA(modencode)	0.768651	0.0322818	24	17	0.576787	0.0547752	0.661557	24
l(3)neo38.l_l(3)neo38.l[[251]](modencode)	0.768651	0.0322818	24	6	1.90311	0.209378	0.767505	24
Lac-RB(modencode)	0.768651	0.0322818	24	12	2.09707	0.119934	0.714256	24
lig.aa(modencode)	1	1	24	13	0.361779	0.0427687	0.653819	16
lig.ab(modencode)	1	1	24	11	0.258613	0.053387	0.660832	16
lig.c(modencode)	1	1	24	13	0.33128	0.0364776	0.647857	16
lig.e(modencode)	1	1	24	13	0.330902	0.0364622	0.64784	16
lig.l(modencode)	1	1	24	15	0.306696	0.0503501	0.659115	16
lig.z(modencode)	1	1	24	13	0.294651	0.0405072	0.651877	16
Mdr65.a(modencode)	0.768651	0.0322818	24	18	1.30687	0.0512239	0.659629	24
Mdr65-RA(modencode)	0.768651	0.0322818	24	18	1.49532	0.0584167	0.6633	24
Men.a(modencode)	1	0.695705	24	14	1.35616	0.824264	0.868896	8
Men.b(modencode)	1	0.695705	24	14	1.35277	0.823578	0.868801	8
Men-RA(modencode)	1	0.695705	24	14	1.30242	0.812719	0.86728	8
Men-RB(modencode)	1	0.695705	24	14	1.43076	0.824268	0.868896	8
MESK2.g(modencode)	0.768651	0.0322818	24	10	1.94617	0.160129	0.744151	24
MESK2.k(modencode)	0.768651	0.0322818	24	10	1.78375	0.175969	0.752919	24
Mf.c(modencode)	1	1	24	15	0	0.393486	0.805986	8
Mf.d(modencode)	1	1	24	15	0	0.409073	0.80774	8
Mf.g(modencode)	1	1	24	15	0	0.385943	0.805088	8
Mf-MIP03196(modencode)	1	1	24	15	0	0.420999	0.809	8
Mf-RC(modencode)	1	1	24	15	3.70074e-17	0.405183	0.807314	8
Mf-RE(modencode)	1	1	24	15	3.70074e-17	0.287557	0.789405	8
Mf-RH(modencode)	1	1	24	15	0	0.272652	0.786121	8
mld.e(modencode)	1	1	24	15	0.0323855	0.674815	0.844379	9
mld.f(modencode)	1	1	24	15	0.0326683	0.674651	0.844347	9
mld-RB(modencode)	1	1	24	15	0.0323384	0.674479	0.844313	9
Mnt.f(modencode)	0.768651	0.0322818	24	8	4.54677	0.10206	0.695138	24
Mnt.i(modencode)	0.768651	0.0322818	24	10	3.1841	0.0629405	0.665194	24
Mnt.n(modencode)	0.768651	0.0322818	24	10	3.15957	0.0924975	0.682467	24
Mnt.o(modencode)	0.768651	0.0322818	24	10	3.04912	0.0894135	0.678473	24
Mnt.x(modencode)	0.768651	0.0322818	24	10	2.76564	0.167963	0.748668	24
mrj-RC(modencode)	0.768651	0.0322818	24	10	0.322724	0.593017	0.8268	24
mub.e(modencode)	0.768651	0.0322818	24	8	11.2749	0.0587425	0.663445	24
mub.f(modencode)	0.768651	0.0322818	24	8	11.2882	0.059611	0.663827	24
mub.g(modencode)	0.768651	0.0322818	24	8	11.1772	0.0587426	0.663445	24
mub.h(modencode)	0.768651	0.0322818	24	8	11.1371	0.0587431	0.663446	24
mub.j(modencode)	0.768651	0.0322818	24	8	10.8573	0.0604596	0.664189	24
mub.k(modencode)	0.768651	0.0322818	24	8	11.0159	0.0602977	0.664121	24
mub.m(modencode)	0.768651	0.0322818	24	8	11.736	0.0537122	0.661005	24
mub.s(modencode)	0.768651	0.0322818	24	8	13.9495	0.059722	0.663875	24
mub-RA(modencode)	0.768651	0.0322818	24	8	10.8068	0.0561396	0.662235	24
mub-RB(modencode)	0.768651	0.0322818	24	8	13.6687	0.0595228	0.663788	24
mub-RC(modencode)	0.768651	0.0322818	24	8	15.3432	0.0684021	0.667159	24
nAcRbeta-21C.a(modencode)	0.768651	0.0322818	24	14	1.00126	0.209628	0.767599	24
nAcRbeta-21C.b(modencode)	0.768651	0.0322818	24	14	0.846407	0.209639	0.767602	24
nAcRbeta-21C-RA(modencode)	0.768651	0.0322818	24	14	0.921643	0.209584	0.767582	24
nAcRbeta-21C-RB(modencode)	0.768651	0.0322818	24	14	0.941159	0.209628	0.767598	24
nc_13295.a(modencode)	0.768651	0.0322818	24	11	1.92934	0.0480447	0.657673	24
nc_21598.a(modencode)	0.768651	0.0322818	24	20	0.774353	0.663101	0.842064	24
nc_2163.a(modencode)	0.768651	0.0322818	24	10	0	0.0416723	0.652903	8
nc_21742.a(modencode)	1	0.695705	24	16	2.39356	0.848701	0.872188	24
Nnp-1-RA(modencode)	0.768651	0.0322818	24	4	0.19	0.388577	0.805405	9
Oat-RA(modencode)	1	0.915543	24	15	1.54333	0.58841	0.825727	8
olf186-F-RA(modencode)	0.768651	0.0322818	24	20	0.204	0.390759	0.805665	24
ome-RE(modencode)	1	0.268421	24	19	0.132724	0.609031	0.830424	8
Pep-RB(modencode)	0.768651	0.0322818	24	1	2.91575	0.0851207	0.675141	24
PICK1-RB(modencode)	0.768651	0.0322818	24	8	0.0946816	0.0758699	0.66967	24
psq.c(modencode)	0.768651	0.0322818	24	8	16.8697	0.0446446	0.655288	24
psq.d(modencode)	0.768651	0.0322818	24	8	15.7721	0.0520566	0.660103	24
Ptp4E.j(modencode)	0.768651	0.0322818	24	20	1.75271	0.0686628	0.667246	24
Pvf3.f(modencode)	0.768651	0.0322818	24	10	0	0.326972	0.796744	24
Rh50.b(modencode)	0.768651	0.0322818	24	18	1.69734	0.12774	0.721176	24
Rh50-RA(modencode)	0.768651	0.0322818	24	18	1.54991	0.117752	0.712183	24
RhoGAP18B.a(modencode)	0.768651	0.0322818	24	14	0.819112	0.0506193	0.659275	8
RhoGAP18B.c(modencode)	0.768651	0.0322818	24	14	0.699258	0.0442501	0.654989	8
RhoGAP18B.d(modencode)	0.768651	0.0322818	24	14	0.689924	0.0462149	0.656431	8
RhoGAP18B.f(modencode)	0.768651	0.0322818	24	14	0.749887	0.0467639	0.656813	8
RhoGAP18B.g(modencode)	0.768651	0.0322818	24	14	0.739139	0.0488232	0.658174	8
RhoGAP18B-RD(modencode)	0.768651	0.0322818	24	14	0.804051	0.0529789	0.660612	8
rin.f(modencode)	0.768651	0.0322818	24	11	1.60273	0.146943	0.735612	24
RpL34a-RA(modencode)	1	1	24	11	0	0.0625109	0.665026	8
RpL34a-RB(modencode)	1	1	24	9	0.00440763	0.0908896	0.680126	8
RpL34a-RC(modencode)	1	1	24	11	0	0.0625088	0.665025	8
Rpn7-RA(modencode)	1	1	24	17	0.429308	0.543909	0.819468	48
sano-RA(modencode)	1	1	24	15	0.759551	0.722833	0.853199	48
sano-RB(modencode)	1	1	24	17	0.411112	0.726803	0.853884	48
sano-RE(modencode)	1	1	24	17	0.427611	0.731808	0.854738	48
scu-RA(modencode)	0.768651	0.0322818	24	9	0.954877	0.472724	0.813763	24
sd.k(modencode)	1	1	24	11	0	0.0766616	0.670177	16
sd.l(modencode)	1	1	24	11	0	0.0755003	0.669512	16
Sep4-RC(modencode)	0.768651	0.0322818	24	13	6.02766	0.351684	0.80056	24
Sep4-RD(modencode)	0.768651	0.0322818	24	13	5.93355	0.351687	0.80056	24
Sep4-RE(modencode)	0.768651	0.0322818	24	13	5.90356	0.35168	0.800559	24
sgg.c(modencode)	0.768651	0.0322818	24	8	6.38404	0.233049	0.775543	24
sgg-RA(modencode)	0.768651	0.0322818	24	8	7.51004	0.233916	0.775809	24
sgg-RL(modencode)	0.768651	0.0322818	24	8	9.12804	0.203139	0.765107	24
sgg-RM(modencode)	0.768651	0.0322818	24	8	7.31134	0.216277	0.770011	24
Slob-RB(modencode)	0.768651	0.0322818	24	8	18.3051	0.218632	0.770834	24
sn.c(modencode)	0.768651	0.0322818	24	14	8.25759	0.0655698	0.66618	24
snmRNA:430:CR33728-RA(modencode)	1	1	24	17	4.30348	0.434596	0.810356	16
snmRNA:430:CR33743-RA(modencode)	1	1	24	15	19.8157	0.684595	0.84626	48
snmRNA:438-RA(modencode)	0.768651	0.0322818	24	17	12.3433	0.318633	0.795332	24
sn-RA(modencode)	0.768651	0.0322818	24	14	10.849	0.0679665	0.667014	24
sn-RB(modencode)	0.768651	0.0322818	24	14	9.60873	0.0697697	0.667605	24
sn-RD(modencode)	0.768651	0.0322818	24	14	10.6786	0.0688441	0.667305	24
SP1173.a(modencode)	1	0.915543	24	19	2.55662	0.390574	0.805643	8
SP1173.b(modencode)	1	0.915543	24	19	2.43545	0.384027	0.804855	8
SP1173-RA(modencode)	1	0.695705	24	19	2.5866	0.403273	0.807102	8
SP1173-RB(modencode)	1	0.695705	24	19	2.67117	0.412165	0.808074	8
SP1173-RC(modencode)	1	0.915543	24	19	2.42386	0.383999	0.804852	8
SP1173-RD(modencode)	1	0.915543	24	19	2.3249	0.38404	0.804857	8
spin-RB(modencode)	0.88744	0.0525464	24	14	2.10357	0.224797	0.772914	24
Spn1-RA(modencode)	0.768651	0.0322818	24	8	0.944836	0.147947	0.736308	24
Spn1-RB(modencode)	0.768651	0.0322818	24	10	0.946533	0.142568	0.732517	24
svp-RC(modencode)	0.768651	0.0322818	24	4	1.06957	0.125047	0.718871	24
tam-RA(modencode)	0.768651	0.0322818	24	20	0.380565	0.049584	0.65865	24
Teh2.c(modencode)	0.768651	0.0322818	24	14	3.22865	0.116299	0.710767	24
thoc5.a(modencode)	1	0.377215	24	16	0.468175	0.664555	0.842355	16
thoc5-RA(modencode)	1	0.377215	24	16	0.46563	0.664568	0.842357	16
Treh.b(modencode)	0.768651	0.0322818	24	22	3.85981	0.57542	0.822831	24
Treh.e(modencode)	0.768651	0.0322818	24	22	4.18141	0.600073	0.828417	24
Treh.f(modencode)	0.768651	0.0322818	24	22	4.15941	0.611368	0.830959	24
Treh.g(modencode)	0.768651	0.0322818	24	22	4.14273	0.611367	0.830958	24
Treh.j(modencode)	0.768651	0.0322818	24	22	4.75204	0.574017	0.822635	24
Treh-RA(modencode)	0.768651	0.0322818	24	22	4.05915	0.608455	0.830297	24
Treh-RB(modencode)	0.768651	0.0322818	24	22	4.34475	0.564954	0.821715	24
Treh-RC(modencode)	0.768651	0.0322818	24	22	4.07294	0.572417	0.822474	24
Treh-RD(modencode)	0.768651	0.0322818	24	22	4.12943	0.610909	0.830853	24
Treh-RE(modencode)	0.768651	0.0322818	24	22	4.03772	0.611335	0.830951	24
Treh-RF(modencode)	0.768651	0.0322818	24	22	3.69039	0.575835	0.822901	24
tst-RA(modencode)	1	1	24	15	0.154998	0.28526	0.788919	12
vari.c(modencode)	0.768651	0.0322818	24	17	0.920865	0.0563291	0.662327	24
Zasp52-RI(modencode)	1	0.377215	24	15	0.327426	0.654547	0.840329	24
Sply-RA(modencode)	1	1	24	9	0.144792	0.318374	0.795287	16
CG31431.e(modencode)	1	1	24	15	0.00909811	0.0323075	0.642715	12
Sply.a(modencode)	1	1	24	9	0.151745	0.318384	0.795289	16
CG14619.d(modencode)	1	0.125882	24	16	1.42638	0.032319	0.642731	8
shf.b(modencode)	1	1	24	9	0.332764	0.0323314	0.642748	12
robl.b(modencode)	1	1	24	7	0.726246	0.815472	0.867669	9
robl-RA(modencode)	1	1	24	7	0.914265	0.815503	0.867673	9
robl.a(modencode)	1	1	24	7	1.01566	0.815499	0.867673	9
cib.f(modencode)	1	1	24	11	3.15346	0.272008	0.785971	48
Rab39.a(modencode)	1	1	24	11	2.50768	0.0323582	0.642785	48
mrt.f(modencode)	1	1	24	17	0.526795	0.0323943	0.642834	8
CG5541-RB(modencode)	1	1	24	9	0.0764382	0.0324184	0.642868	12
ens.i(modencode)	1	1	24	9	1.88105	0.0324345	0.64289	48
ens.ab(modencode)	1	1	24	11	2.57271	0.0324689	0.642937	48
ens-RA(modencode)	1	1	24	9	1.81305	0.0325299	0.64302	48
Rab39.b(modencode)	1	1	24	11	2.05768	0.0325431	0.643038	8
cib.g(modencode)	1	1	24	11	3.05876	0.224011	0.772655	48
pUf68-RH(modencode)	1	0.915543	24	1	8.00219	0.0325567	0.643057	16
CG13912-RA(modencode)	1	1	24	5	0.0643231	0.0325629	0.643065	9
Rab39-RA(modencode)	1	1	24	11	2.45034	0.0328051	0.643393	48
CG12926-RA(modencode)	1	1	24	17	0.512464	0.0328759	0.643487	16
cib.a(modencode)	1	1	24	11	2.78822	0.130031	0.723072	48
ens.g(modencode)	1	1	24	9	1.87105	0.0329025	0.643523	48
ens-RE(modencode)	1	1	24	9	1.84583	0.0329027	0.643523	48
ens.l(modencode)	1	1	24	9	1.81429	0.0329776	0.643623	48
nc_1047.a(modencode)	1	1	24	7	1.51427	0.351343	0.800511	16
CG40127.a(modencode)	1	1	24	11	1.02731	0.0330148	0.643672	16
ens.ac(modencode)	1	1	24	11	2.46377	0.0330336	0.643697	48
ens.n(modencode)	1	1	24	11	2.49286	0.0330346	0.643699	48
CG5021-RA(modencode)	1	0.695705	24	13	0	0.480808	0.814419	12
CG5021-RC(modencode)	1	0.695705	24	13	0	0.480827	0.814421	12
CG5021-RD(modencode)	1	0.695705	24	13	0	0.480854	0.814423	12
CG5021-RB(modencode)	1	0.695705	24	13	0	0.480823	0.81442	12
CG5021.a(modencode)	1	0.695705	24	13	0	0.480833	0.814421	12
CG4966-RB(modencode)	1	1	24	9	0.386245	0.665108	0.842465	48
pUf68-RE(modencode)	1	0.915543	24	1	7.57064	0.0332455	0.643976	16
Hr46-RD(modencode)	1	1	24	15	0.046834	0.0332845	0.644027	48
shf.a(modencode)	1	1	24	13	0	0.0333147	0.644067	12
ens.b(modencode)	1	1	24	11	2.78817	0.0333653	0.644133	48
Mical.h(modencode)	1	0.186301	24	7	2.76161	0.314269	0.794566	24
CG11876-RB(modencode)	1	1	24	15	0.59239	0.0334282	0.644215	9
CG11876-RC(modencode)	1	1	24	15	0.606438	0.0334334	0.644221	9
CG1347.c(modencode)	1	1	24	9	0.273344	0.0334466	0.644238	48
CG17683-RB(modencode)	1	1	24	9	0.489719	0.0335151	0.644327	48
CG4049.c(modencode)	1	1	24	15	0.200041	0.341231	0.799009	16
CG11779-RD(modencode)	1	1	24	15	0.598259	0.0335421	0.644362	12
CG31431-RA(modencode)	1	1	24	17	0.0118087	0.0336225	0.644465	12
Mical.f(modencode)	1	0.186301	24	7	2.75068	0.312439	0.794238	24
Mical.g(modencode)	1	0.186301	24	7	2.75461	0.313923	0.794504	24
nc_14208.a(modencode)	1	1	24	11	0.0206004	0.0336435	0.644492	8
sbb-RD(modencode)	1	1	24	5	0.328828	0.0336511	0.644502	16
CG17683-RD(modencode)	1	1	24	9	0.48887	0.0336568	0.644509	48
CG17683.a(modencode)	1	1	24	9	0.516518	0.033657	0.644509	48
CG17683-RE(modencode)	1	1	24	9	0.489341	0.0336598	0.644513	48
Ca-P60A.ac(modencode)	1	1	24	15	0	0.033663	0.644517	48
ens.v(modencode)	1	1	24	11	2.63682	0.0337419	0.644618	48
ens.r(modencode)	1	1	24	11	2.67183	0.0337436	0.64462	48
Mical.e(modencode)	1	0.186301	24	7	2.74951	0.3127	0.794285	24
CG17683.c(modencode)	1	1	24	9	0.524885	0.033756	0.644636	48
ens.u(modencode)	1	1	24	9	1.70849	0.033757	0.644637	48
AP-1gamma-RF(modencode)	1	1	24	9	0.0252201	0.0337871	0.644675	8
CG17683.b(modencode)	1	1	24	9	0.552062	0.0338635	0.644772	48
CG17683.d(modencode)	1	1	24	9	0.570918	0.0338642	0.644773	48
Tfb1-RA(modencode)	1	1	24	13	0	0.0339144	0.644836	48
Tfb1.a(modencode)	1	1	24	13	0	0.0339183	0.644841	48
Tfb1.b(modencode)	1	1	24	13	0	0.0339183	0.644841	48
Tfb1-RC(modencode)	1	1	24	13	0	0.0339226	0.644847	48
Tfb1-RB(modencode)	1	1	24	13	0	0.033925	0.64485	48
didum-RC(modencode)	1	1	24	17	0	0.0339542	0.644886	48
g.c(modencode)	1	1	24	11	0.178191	0.0339716	0.644908	48
CG13741-RA(modencode)	1	1	24	13	0.789744	0.0750639	0.669323	16
inx2-RB(modencode)	1	0.915543	24	2	0	0.730928	0.854588	16
ctp.b(modencode)	1	1	24	11	13.0572	0.0340731	0.645036	48
CG6695-RB(modencode)	1	1	24	15	0.222456	0.0341276	0.645104	48
ctp-RB(modencode)	1	1	24	11	25.3705	0.0341812	0.64517	48
Cht6-RB(modencode)	1	1	24	15	0.0643703	0.0341818	0.645171	12
Eip75B.a(modencode)	1	1	24	13	0.267923	0.0341853	0.645176	48
CG17683-RA(modencode)	1	1	24	9	0.46827	0.034226	0.645226	48
ctp-RD(modencode)	1	1	24	11	27.2706	0.0342645	0.645274	48
chrU_9095334_9095995.0(modencode)	1	1	24	7	0	0.0342895	0.645305	16
Eip75B.b(modencode)	1	1	24	13	0.251046	0.0343491	0.645378	48
CG2225-RE(modencode)	1	1	24	13	0	0.0343544	0.645385	16
Eip75B.g(modencode)	1	1	24	13	0.257222	0.0344083	0.645451	48
CG8312.d(modencode)	1	1	24	13	0.108258	0.0345023	0.645566	48
ens-RF(modencode)	1	1	24	11	2.32803	0.0345601	0.645637	48
CG17683-RC(modencode)	1	1	24	9	0.503649	0.0345727	0.645652	48
CG11050.a(modencode)	1	0.125882	24	14	0.876459	0.348647	0.800118	24
Rbp9-RG(modencode)	1	1	24	13	0.110356	0.762593	0.85978	8
CG1888.c(modencode)	1	1	24	11	0	0.034691	0.645796	16
Ank.h(modencode)	1	1	24	15	0.212156	0.0346949	0.6458	8
Ank.d(modencode)	1	1	24	15	0.222621	0.0346969	0.645803	8
Ank.e(modencode)	1	1	24	15	0.221348	0.0347004	0.645807	8
nc_949.a(modencode)	1	0.186301	24	22	0.936987	0.570636	0.822295	24
CG30110-LP21877(modencode)	1	1	24	15	0.0181491	0.0348265	0.645959	16
CG9003-RD(modencode)	1	0.517903	24	8	2.59232	0.636293	0.836498	12
ens.a(modencode)	1	1	24	11	3.49678	0.0348834	0.646027	48
ens.m(modencode)	1	1	24	11	3.42117	0.0348998	0.646047	48
CG7702.c(modencode)	1	1	24	11	0	0.0349226	0.646074	9
AP-1gamma.c(modencode)	1	1	24	9	0.0126808	0.0349847	0.646148	8
didum-RA(modencode)	1	1	24	17	0	0.0350215	0.646192	48
CG2543-RA(modencode)	1	1	24	7	0.0736805	0.035168	0.646365	12
lig.k(modencode)	1	1	24	17	0.379693	0.0351973	0.6464	16
CG9171.a(modencode)	1	1	24	15	0.612378	0.605376	0.829611	48
pzg-RA(modencode)	1	1	24	11	0.0436521	0.238353	0.777145	12
pzg.a(modencode)	1	1	24	11	0.0420493	0.238295	0.777128	12
CG17683.g(modencode)	1	1	24	9	0.435106	0.035327	0.646552	48
CG17683.f(modencode)	1	1	24	11	0	0.0353978	0.646635	48
ctp.a(modencode)	1	1	24	11	16.1747	0.0354994	0.646753	48
CG2051.b(modencode)	1	0.377215	24	18	0.148351	0.695267	0.848262	8
CG30492-RE(modencode)	1	1	24	13	0	0.035533	0.646792	48
dpr15-RA(modencode)	1	1	24	7	0	0.775609	0.861808	12
CG18011-RA(modencode)	0.988158	0.0826246	24	3	0.40641	0.0356564	0.646934	24
CG18011.c(modencode)	0.988158	0.0826246	24	3	0.413764	0.0356633	0.646942	24
CG8712-RA(modencode)	1	1	24	11	0.0486725	0.109969	0.704235	16
Ppcs.c(modencode)	1	1	24	15	0.180077	0.0357985	0.647096	48
eIF-2alpha-RA(modencode)	1	1	24	7	0	0.0358664	0.647174	48
CG17683.e(modencode)	1	1	24	9	0.41691	0.0359421	0.64726	48
CG8778-RA(modencode)	0.988158	0.0826246	24	15	0.754342	0.0360028	0.647328	24
CG14935-RB(modencode)	1	0.125882	24	17	1.05819	0.0360744	0.647409	24
CG8830-RB(modencode)	1	1	24	13	1.83812	0.0360828	0.647418	48
CG12897-RA(modencode)	1	1	24	11	10.4899	0.0362676	0.647625	8
cib-RB(modencode)	1	1	24	11	2.41609	0.195458	0.761968	48
CG9286-RA(modencode)	1	1	24	9	0.177248	0.311301	0.794033	48
CG9286.a(modencode)	1	1	24	9	0.205367	0.311281	0.794029	48
CG8232-RA(modencode)	1	1	24	15	0.061424	0.467094	0.813293	12
CG10151-RD(modencode)	1	0.186301	24	15	0.321415	0.626733	0.834416	16
Pabp2.a(modencode)	1	1	24	15	0.125771	0.931044	0.88216	9
ctp-RA(modencode)	1	1	24	11	20.3811	0.0364415	0.647818	48
Mes-4-RA(modencode)	1	1	24	5	0	0.0364556	0.647833	48
fat2.a(modencode)	1	1	24	5	0.190872	0.113495	0.707948	8
ssp4.k(modencode)	1	1	24	9	0	0.0365344	0.64792	16
RpL3.b(modencode)	1	1	24	7	0	0.0365387	0.647925	12
Hr46-RB(modencode)	1	1	24	15	0.0149671	0.0365559	0.647943	48
ImpL2.b(modencode)	1	1	24	17	1.49666	0.924578	0.881433	8
ctp-RC(modencode)	1	1	24	11	18.504	0.0366429	0.648039	48
CG15719-RB(modencode)	1	0.125882	24	5	1.50762	0.0367315	0.648135	24
CG9377-RA(modencode)	0.988158	0.0826246	24	3	2.28208	0.0368191	0.64823	24
CG8830.a(modencode)	1	1	24	13	1.7236	0.0368309	0.648243	48
CG17883-RB(modencode)	1	1	24	13	0.66666	0.03684	0.648253	8
CG17883-RA(modencode)	1	1	24	13	0.641063	0.0368414	0.648254	8
CG17883.a(modencode)	1	1	24	13	0.643279	0.0368456	0.648259	8
CG17883.b(modencode)	1	1	24	13	0.476543	0.0369395	0.64836	8
CR41607-RA(modencode)	1	1	24	11	84.164	0.0369436	0.648364	48
CG32062.f(modencode)	1	0.915543	24	10	0.647851	0.036975	0.648398	12
shf.c(modencode)	1	1	24	9	0.330266	0.0370077	0.648433	12
Obp99a-RA(modencode)	1	0.268421	24	14	7.12905	0.0370541	0.648483	8
white-RA(modencode)	1	1	24	15	0	0.0371198	0.648553	48
Mical.d(modencode)	1	0.186301	24	7	2.74174	0.296564	0.791241	24
ssp4.i(modencode)	1	1	24	9	0	0.037326	0.648772	16
CG1347.d(modencode)	1	1	24	9	0.183094	0.0374273	0.648878	48
tra-RB(modencode)	1	1	24	13	0.138876	0.0537182	0.661008	48
mrt.e(modencode)	1	1	24	17	0.688298	0.0376591	0.64912	48
CG11009.b(modencode)	1	1	24	11	0.149152	0.0377317	0.649195	12
Eip63E.l(modencode)	1	1	24	9	0.327909	0.0377643	0.649229	48
ssp4.j(modencode)	1	1	24	11	0	0.0377931	0.649258	16
Tbp-RA(modencode)	1	1	24	17	0	0.0378927	0.649361	48
PGRP-LC-RE(modencode)	1	1	24	7	0.296207	0.03791	0.649378	48
Nak.b(modencode)	1	0.186301	24	9	0.323219	0.0379129	0.649381	24
mrt-RA(modencode)	1	1	24	17	0.551095	0.0380834	0.649555	8
CG8155-RA(modencode)	1	1	24	5	0	0.764396	0.860064	9
CG30381-RB(modencode)	1	1	24	15	0.0929845	0.0382653	0.649739	9
CG30381.a(modencode)	1	1	24	15	0.0976986	0.0382715	0.649745	9
Smg5.c(modencode)	1	1	24	13	0	0.0382838	0.649758	16
Atg18.e(modencode)	1	1	24	15	0.250787	0.0383027	0.649777	16
CG1347.b(modencode)	1	1	24	9	0.210105	0.0383719	0.649846	48
CG32174-RB(modencode)	1	0.377215	24	2	0.571908	0.430342	0.809941	16
CG40196-RA(modencode)	1	1	24	9	0.792737	0.0384008	0.649875	48
AnnIX-RA(modencode)	1	1	24	7	0.447716	0.0384823	0.649956	9
Det-RA(modencode)	1	1	24	7	0	0.0385307	0.650004	16
CG32369.b(modencode)	1	1	24	13	0.521303	0.456848	0.81241	12
ry-RA(modencode)	0.88744	0.0525464	24	20	0.374201	0.038599	0.650072	24
CG3436-RB(modencode)	1	0.915543	24	20	0	0.757503	0.85897	12
Dlc90F-RA(modencode)	1	1	24	7	0.675523	0.670442	0.843522	8
Atg18-RA(modencode)	1	1	24	15	0.278388	0.0386542	0.650127	16
CG13624.g(modencode)	0.88744	0.0525464	24	10	1.69197	0.0386675	0.65014	24
jeb.a(modencode)	1	1	24	7	0	0.631972	0.835564	48
Cyt-c-d-RA(modencode)	1	1	24	17	0.382851	0.0388915	0.65036	12
CG40451-RA(modencode)	1	1	24	13	4.62066	0.0389065	0.650374	24
drongo-RB(modencode)	1	1	24	7	0.409344	0.0390245	0.650489	48
[truncated: 276 more rows]
