# Supplementary material for: Deep sequencing the circadian and diurnal transcriptome ofDrosophilabrain
Source: HighWire-hosted journal article supplement (doi:10.1101/gr.128876.111), 2012-04-03
Supplement: Table_S9.xlsx [file Table_S9.xlsx]

## Sheet: Sheet1
transcript	WT JTK p-value	Per0 JTK p-value	WT FG p-value	Per0 FG p-value
beat-Ia.a(modencode)	0.0220238	0.0220238	0.165694	0.155059
beat-Ia-RA(modencode)	0.0220238	0.0220238	0.165879	0.154924
CG15890-RA(modencode)	0.000198413	0.0220238	0.212462	0.706772
CG15890.a(modencode)	0.000198413	0.0220238	0.212545	0.706652
CG11155.a(modencode)	0.00694444	0.0220238	0.266215	0.396138
CG11155.b(modencode)	0.00694444	0.0220238	0.266224	0.396261
CG11155-RA(modencode)	0.00694444	0.0220238	0.270044	0.395552
CG11155.d(modencode)	0.00694444	0.0220238	0.286782	0.390209
CG11155.e(modencode)	0.00694444	0.0220238	0.28695	0.395618
CG13893.a(modencode)	0.0220238	0.00694444	0.444909	0.158286
CG10553-RA(modencode)	0.00694444	0.0220238	0.00398046	0.588802
Uhg1-RA(modencode)	0.0015873	0.0220238	0.00569846	0.437052
CG42393.b(modencode)	0.0015873	0.0220238	0.0221408	0.194093
loqs-RB(modencode)	0.0220238	0.0220238	0.0632873	0.15857
loqs.a(modencode)	0.0220238	0.0220238	0.0632879	0.158561
loqs-RC(modencode)	0.0220238	0.0220238	0.069972	0.146347
CG4641.a(modencode)	0.00694444	0.00694444	0.0882525	0.0740118
CG4641-RA(modencode)	0.00694444	0.00694444	0.0883008	0.0740893
CG13631-RA(modencode)	0.0220238	1	0.0353918	0.0026518
PGRP-SD-RA(modencode)	0.124603	0.0220238	0.0442025	0.00818761
PGRP-SD-IP02674(modencode)	0.124603	0.0220238	0.0442034	0.00818853
Cng-RA(modencode)	1	1	0.0237761	0.0451179
CoRest-RD(modencode)	1	0.244048	0.0125519	0.0482518
CG15709.a(modencode)	1	1	0.0108049	0.0184607
CG1109-RB(modencode)	1	1	0.024216	0.0011775
CG8097-RA(modencode)	1	1	0.0421872	0.0224339
CG8097.a(modencode)	1	1	0.0228538	0.032028
