# Supplementary material for: Deep sequencing the circadian and diurnal transcriptome ofDrosophilabrain
Source: HighWire-hosted journal article supplement (doi:10.1101/gr.128876.111), 2012-04-03
Supplement: Table_S10.xlsx [file Table_S10.xlsx]

## Sheet: Sheet1
Gene	Transcript	JTK p-value LD	FG p-value LD	JTK p-value DD	Cycles in DD but not LD
CG10237	CG10237-RA(modencode)	0.434722	0.303866	1
	CG10237-RB(modencode)	0.434722	0.877864	1
	CG10237-RC(modencode)	0.715476	0.428863	1
CG11891	CG11889-RA(modencode)	0.715476	0.100086	0.0322818	yes
CG12023	GV1-RA(modencode)	0.244048	0.305417	0.915543
	GV1-RB(modencode)	0.715476	0.179084	0.695705
CG12120	tan-RA(modencode)	1	0.65204	1
CG12790	CG32306.a(modencode)	0.434722	0.262026	0.0108197	yes
	CG32306.b(modencode)	0.434722	0.239699	0.0826246
	CG32306-RA(modencode)	0.434722	0.488487	0.0525464
	CG32306-RB(modencode)	0.434722	0.278621	0.0826246
	CG32306-RC(modencode)	0.434722	0.44414	0.517903
	CG32306-RD(modencode)	0.434722	0.267542	0.0525464
	CG32306-RE(modencode)	0.244048	0.219835	0.0826246
	CG32306-RF(modencode)	0.434722	0.253363	0.0525464
CG12955	Fs-RA(modencode)	0.0565476	0.00449431	0.186301
	Fs.a(modencode)	0.0565476	0.00479264	0.268421
	Fs.b(modencode)	0.0565476	0.00502913	0.268421
CG13305	CG13305.a(modencode)	0.715476	0.0991373	0.0826246
	CG13305-RB(modencode)	0.715476	0.10434	0.0826246
	CG13305-RC(modencode)	0.715476	0.107808	0.0826246
CG14275	CG14275.a(modencode)	1	0.658395	1
	CG14275.b(modencode)	1	0.721562	1
	CG14275-RA(modencode)	1	0.604821	1
	CG14275-RB(modencode)	1	0.613403	1
CG14557	CG31324.a(modencode)	1	0.653434	0.377215
	CG31324.b(modencode)	1	0.465882	0.915543
	CG31324-RA(modencode)	1	0.456854	0.915543
CG15162	MESR3.a(modencode)	1	0.385811	0.0525464
	MESR3.b(modencode)	1	0.738065	0.517903
	MESR3.c(modencode)	1	0.815268	1
	MESR3-RA(modencode)	0.715476	0.531973	0.125882
CG15518	CG31036.a(modencode)	0.715476	0.182179	0.0525464
	CG31036-RA(modencode)	1	0.0707791	1
	CG31036-RB(modencode)	0.715476	0.18223	0.0525464
CG1561	CG1561-RA(modencode)	0.715476	0.358847	0.0826246
	CG1561-RB(modencode)	0.715476	0.359039	0.125882
CG17352	CG17352-RA(modencode)	0.715476	0.201466	0.186301
	CG17352-RB(modencode)	0.715476	0.201464	0.186301
	CG17352-RC(modencode)	0.715476	0.200995	0.186301
	CG17352-RD(modencode)	0.715476	0.20157	0.186301
	CG17352-RE(modencode)	0.715476	0.0266061	1
CG17386	CG17386-RA(modencode)	0.244048	0.00178479	0.000644541
CG18330	Cct2-RA(modencode)	0.715476	0.372755	0.0322818	yes
CG2082	CG2082.a(modencode)	0.715476	0.284611	0.0826246
	CG2082.b(modencode)	0.0565476	0.0316614	0.186301
	CG2082.c(modencode)	0.0220238	0.0291193	0.186301
	CG2082-AT13994(modencode)	0.434722	0.220789	0.186301
	CG2082-RA(modencode)	0.0565476	0.038839	0.268421
	CG2082-RB(modencode)	0.0220238	0.0265534	0.268421
	CG2082-RC(modencode)	0.0565476	0.028616	0.268421
	CG2082-RD(modencode)	1	0.141392	1
	CG2082-RG(modencode)	0.0565476	0.0359617	0.268421
	CG2082-RH(modencode)	0.0565476	0.0262008	0.268421
	CG2082-RI(modencode)	1	0.133484	0.517903
	CG2082-RJ(modencode)	0.0565476	0.0287697	0.186301
	CG2082-RK(modencode)	0.0220238	0.0263745	0.268421
	CG2082-RL(modencode)	0.0565476	0.026333	0.186301
	CG2082-RM(modencode)	1	0.104124	0.125882
	CG2082-RN(modencode)	1	0.0838877	1
CG2121	CG2121-RA(modencode)	0.715476	0.738302	1
	CG2121-RB(modencode)	1	0.726549	0.156092
CG2827	Tal-RA(modencode)	0.715476	0.985917	0.0525464
CG3940	CG3940.a(modencode)	1	0.247576	0.268421
	CG3940.b(modencode)	1	0.286492	0.377215
	CG3940.c(modencode)	1	0.290849	0.268421
	CG3940-RA(modencode)	1	0.286371	0.377215
CG43340	CG30494-RA(modencode)	1	0.421382	1
CG4779	hgo-RA(modencode)	0.715476	0.937526	1
CG4784	Cpr72Ec-RA(modencode)	0.434722	0.017471	0.186301
CG4919	Gclm-RA(modencode)	0.434722	0.63395	1
CG4962	CG4962.a(modencode)	1	0.814608	1
	CG4962.b(modencode)	1	0.835916	1
	CG4962-RA(modencode)	1	0.835919	1
CG5031	dlp.a(modencode)	0.434722	0.0118457	1
	dlp-RA(modencode)	0.434722	0.0118452	1
	dlp-RB(modencode)	0.434722	0.0116125	1
CG5156	CG42329.a(modencode)	0.715476	0.378804	1
	CG42329-IP06484(modencode)	0.434722	0.314256	1
	CG42329-RA(modencode)	0.715476	0.373146	1
CG5455	CG5455.a(modencode)	0.244048	0.4855	0.0826246
	CG5455.b(modencode)	0.244048	0.485498	0.0826246
	CG5455.c(modencode)	0.244048	0.69453	0.125882
	CG5455.d(modencode)	0.434722	0.757285	0.125882
cg5455	CG5455.e(modencode)	0.244048	0.611216	0.125882
	CG5455-RA(modencode)	0.244048	0.487262	0.0826246
	CG5455-RB(modencode)	0.244048	0.61178	0.125882
	CG5455-RC(modencode)	0.244048	0.627225	0.125882
CG5798	CG5798.a(modencode)	0.0015873	0.00182652	0.268421
	CG5798-RA(modencode)	0.000198413	0.000356054	0.517903
CG5853	CG5853.a(modencode)	1	0.415996	0.0108197	yes
	CG5853-RA(modencode)	1	0.403105	0.0108197
CG6409	CG6409-RA(modencode)	1	0.679331	0.517903
CG7388	CG32369.a(modencode)	0.244048	0.443478	0.695705
	CG32369.b(modencode)	0.434722	0.610065	1
	CG32369.c(modencode)	0.124603	0.320049	1
	CG32369-RB(modencode)	0.434722	0.472315	1
CG8419	CG8419-RA(modencode)	1	0.0063396	0.695705
Chd64	Chd64.a(modencode)	0.124603	0.0366966	0.0525464
	Chd64-RB(modencode)	0.124603	0.0378869	0.0525464
clk	Clk.a(modencode)	0.244048	0.000796752	0.0108197
	Clk.b(modencode)	0.244048	0.000796679	0.0108197
	Clk-RA(modencode)	0.244048	0.000847462	0.0190899
	Clk-RD(modencode)	0.244048	0.000847503	0.0108197
cry	cry-RA(modencode)	0.124603	0.295073	0.125882
Cyp4d21	Cyp4d21	ns	ns	1
inos	Inos.a(modencode)	0.244048	0.084928	0.186301
	Inos-RA(modencode)	0.244048	0.0849169	0.186301
pdh	Pdh.b(modencode), Pdh-RB(modencode), Pdh-RD(modencode)	0.715476	0.0473256	0.000644541
	Pdh-RA(modencode), Pdh-RC(modencode), Pdh.a(modencode)	0.715476	0.0474788	0.000644541
per	per.a(modencode)	0.0565476	0.00170218	0.0108197
	per-RA(modencode)	0.0565476	0.0016693	0.0108197
pkc53e	Pkc53E.a(modencode)	0.124603	0.644928	1
	Pkc53E.b(modencode)	0.124603	0.616218	1
	Pkc53E.c(modencode)	0.124603	0.616082	1
	Pkc53E.d(modencode)	0.715476	0.86014	1
	Pkc53E.e(modencode)	0.124603	0.710926	1
	Pkc53E.f(modencode)	0.124603	0.668389	1
	Pkc53E.g(modencode)	0.124603	0.682747	1
	Pkc53E.h(modencode)	0.124603	0.682593	1
	Pkc53E.i(modencode)	0.434722	0.594288	1
	Pkc53E.j(modencode)	0.715476	0.644139	0.915543
	Pkc53E.k(modencode)	0.715476	0.650165	1
	Pkc53E.l(modencode)	0.434722	0.649274	1
	Pkc53E.m(modencode)	0.715476	0.663676	1
	Pkc53E.n(modencode)	0.434722	0.594388	1
	Pkc53E.o(modencode)	0.434722	0.670791	0.915543
	Pkc53E-MIP15613(modencode)	0.434722	0.730348	1
	Pkc53E-RA(modencode)	0.124603	0.60369	1
	Pkc53E-RB(modencode)	0.124603	0.547571	1
	Pkc53E-RC(modencode)	0.124603	0.553588	1
slob	Slob.a(modencode)	0.00694444	0.0681036	0.0525464
	Slob-RA(modencode)	0.00694444	0.0790799	0.0322818
	Slob-RB(modencode)	0.0220238	0.120904	0.0322818
	Slob-RC(modencode)	0.00694444	0.04567	0.0525464
	Slob-RD(modencode)	0.00694444	0.0759613	0.0322818
tim	tim.a(modencode)	0.124603	0.00110174	0.0108197
	tim.b(modencode)	0.0565476	0.00403634	0.00584689
	tim.c(modencode)	0.0565476	0.0010361	0.00584689
	tim.d(modencode)	0.124603	0.00109112	0.0108197
	tim.e(modencode)	0.124603	0.00117165	0.0108197
	tim-RA(modencode)	0.124603	0.00109874	0.0108197
	tim-RC(modencode)	0.0565476	0.00409407	0.00584689
	tim-RD(modencode), tim-RB(modencode)	0.124603	0.00109733	0.0108197
	tim-RE(modencode)	0.124603	0.00108803	0.0108197
	tim-RF(modencode)	0.124603	0.00108803	0.0108197
	tim-RG(modencode)	0.124603	0.00109806	0.0108197
	tim-RH(modencode)	0.124603	0.00109011	0.0108197
trpl	trpl-GH05912(modencode)	0.434722	0.870753	1
	trpl-RA(modencode)	0.434722	0.784125	1
	trpl-RB(modencode)	0.434722	0.776106	1
ugt35b	Ugt35b.a(modencode)	0.124603	0.00792267	0.00584689
	Ugt35b-RA(modencode)	0.124603	0.00783624	0.00584689
vri	vri.a(modencode)	0.00694444	0.000493866	0.0525464
	vri.b(modencode)	0.0220238	0.000445968	0.186301
	vri.c(modencode)	0.0220238	0.000438523	0.0525464
	vri.d(modencode), vri-RA(modencode)	0.0220238	0.000637382	0.00144015
	vri-RC(modencode)	0.0220238	0.000512555	0.0525464
	vri-RD(modencode)	0.0220238	0.000613396	0.0029933
