# Supplementary material for: Deep sequencing the circadian and diurnal transcriptome ofDrosophilabrain
Source: HighWire-hosted journal article supplement (doi:10.1101/gr.128876.111), 2012-04-03
Supplement: Table_S11.xlsx [file Table_S11.xlsx]

## Sheet: Sheet1
Transcript	time p-value	genotype p-value	interaction p-value	time q-value	genotype q-value	interaction q-value	JTK p-value	JTK q-value	FG p-value	FG q-value
Uhg1-RA	0.00357697	0.0154842	0.00187581	0.306067	0.0584488	1	0.0015873	0.300159	0.00569846	0.67165
Uhg4-RA	0.00301625	0.641476	0.00330914	0.30118	0.421718	1	0.00694444	0.300159	0.0292641	0.788541
Uhg5-RD	0.0309083	0.0481355	0.0226586	0.402204	0.104978	1	0.0565476	0.393594	0.0129892	0.749044
Uhg5-RA	0.0250311	0.0574917	0.0332179	0.39151	0.114065	1	0.0565476	0.393594	0.0104499	0.733002
Uhg5-RB	0.0249636	0.0575048	0.0331607	0.391363	0.114077	1	0.0565476	0.393594	0.0103794	0.732457
Uhg2-RA	0.0104074	0.0320069	0.0398663	0.348127	0.0855611	1	0.124603	0.499132	0.0224965	0.778683
Uhg8-RA	0.0807847	0.00545135	0.0600201	0.440296	0.0337294	1	0.715476	1	0.15327	0.880171
Uhg3-RB	0.129486	0.0390881	0.30381	0.463464	0.0945468	1	0.715476	1	0.819918	0.957106
Uhg3-RC	0.128644	0.0458795	0.299023	0.463109	0.102574	1	0.715476	1	0.818947	0.957057
Uhg3-RA	0.139576	0.0501946	0.302092	0.467421	0.107071	1	0.715476	1	0.837447	0.957966
Nop60B.a	4.2943e-06	2.4116e-06	2.99191e-05	0.0221801	0.000574422	1	1	1	0.022665	0.778996
Nop60B.c	3.90391e-06	2.42762e-06	2.70839e-05	0.0221801	0.000576233	1	1	1	0.0234405	0.780381
Nop60B.d	4.20061e-06	2.71873e-06	2.96663e-05	0.0221801	0.000600552	1	1	1	0.0217557	0.777252
Nop60B.b	5.7116e-06	3.62292e-06	4.28577e-05	0.0236174	0.000669	1	1	1	0.0222861	0.778285
Nop60B-RA	0.0788343	0.00698513	0.0922471	0.43924	0.0379461	1	1	1	0.735793	0.952435
Uhg7-RA	0.42625	0.708025	0.813785	0.537895	0.444791	1	ns	ns	ns	ns
