# Supplementary material for: Deep sequencing the circadian and diurnal transcriptome ofDrosophilabrain
Source: HighWire-hosted journal article supplement (doi:10.1101/gr.128876.111), 2012-04-03
Supplement: Table_S12a.xlsx [file Table_S12a.xlsx]

## Sheet: Sheet1
chr2L	10001383	10001606	1	1	+	10001383	10001606	0,205,102
chr2L	10001383	10002233	1	1	+	10001383	10002233	0,205,102
chr2L	10001383	10002237	1	3	+	10001383	10002237	16,78,139
chr2L	10002049	10002233	1	1	+	10002049	10002233	0,205,102
chr2L	10002187	10002346	1	13	+	10002187	10002346	0,205,102
chr2L	10002292	10002448	1	4	+	10002292	10002448	0,205,102
chr2L	10004076	10004584	1	49	+	10004076	10004584	16,78,139
chr2L	10004521	10005473	1	81	+	10004521	10005473	16,78,139
chr2L	10005456	10005617	1	72	+	10005456	10005617	16,78,139
chr2L	10006367	10006524	1	97	+	10006367	10006524	16,78,139
chr2L	10006535	10006957	1	181	+	10006535	10006957	16,78,139
chr2L	10007128	10007301	1	177	+	10007128	10007301	16,78,139
chr2L	10007128	10007304	10	702	+	10007128	10007304	16,78,139
chr2L	10007291	10007463	11	1413	+	10007291	10007463	16,78,139
chr2L	10007295	10007463	1	1	+	10007295	10007463	0,205,102
chr2L	10007415	10007633	1	7	+	10007415	10007633	0,255,127
chr2L	10007453	10007616	12	980	+	10007453	10007616	16,78,139
chr2L	10007698	10007862	1	1	+	10007698	10007862	0,205,102
chr2L	10008140	10304105	1	1	+	10008140	10304105	0,255,127
chr2L	10008232	10410601	1	1	+	10008232	10410601	0,255,127
chr2L	10008850	10432663	1	1	+	10008850	10432663	0,255,127
chr2L	10009368	10009530	1	1	+	10009368	10009530	16,78,139
chr2L	10009371	10009530	1	1	+	10009371	10009530	16,78,139
chr2L	10009484	10010784	1	5	+	10009484	10010784	0,255,127
chr2L	10009486	10009965	1	21	+	10009486	10009965	16,78,139
chr2L	10009486	10010786	140	4453	+	10009486	10010786	16,78,139
chr2L	10009490	10010786	1	1	+	10009490	10010786	0,205,102
chr2L	10009627	10010786	1	1	+	10009627	10010786	0,205,102
chr2L	10009776	10010786	1	1	+	10009776	10010786	16,78,139
chr2L	10009933	10010786	1	16	+	10009933	10010786	16,78,139
chr2L	10010502	10011400	1	1	+	10010502	10011400	0,255,127
chr2L	10010507	10010786	1	3376	+	10010507	10010786	16,78,139
chr2L	10010635	10010786	1	1	+	10010635	10010786	0,205,102
chr2L	10010713	10011053	1	1	+	10010713	10011053	0,205,102
chr2L	10010953	10011104	1	1	+	10010953	10011104	0,205,102
chr2L	10010997	10011691	1	1	+	10010997	10011691	0,255,127
chr2L	10011026	10011944	1	1	+	10011026	10011944	0,255,127
chr2L	10011043	10011302	1	1	+	10011043	10011302	0,255,127
chr2L	10011147	10011736	1	1	+	10011147	10011736	0,255,127
chr2L	10011216	10011544	1	1	+	10011216	10011544	0,255,127
chr2L	10011232	10011402	1	1	+	10011232	10011402	0,255,127
chr2L	10011249	10011448	1	1	+	10011249	10011448	0,255,127
chr2L	10011466	10011911	1	1	+	10011466	10011911	0,255,127
chr2L	10011502	10011656	103	4118	+	10011502	10011656	16,78,139
chr2L	10011502	10011658	1	2	+	10011502	10011658	0,205,102
chr2L	10011502	10011670	1	1	+	10011502	10011670	0,205,102
chr2L	10011691	10011911	1	2	+	10011691	10011911	0,255,127
chr2L	10011858	10012419	1	3	+	10011858	10012419	0,205,102
chr2L	10011858	10012442	1	1	+	10011858	10012442	0,255,127
chr2L	10011858	10012449	102	10951	+	10011858	10012449	16,78,139
chr2L	10012666	10012991	1	1	+	10012666	10012991	0,255,127
chr2L	10012676	10213774	1	1	+	10012676	10213774	0,255,127
chr2L	10012741	10013220	1	1	+	10012741	10013220	0,255,127
chr2L	10013052	10224822	1	1	+	10013052	10224822	0,255,127
chr2L	1003161	1012452	1	1	+	1003161	1012452	0,255,127
chr2L	10032689	10032938	1	2	+	10032689	10032938	16,78,139
chr2L	10032903	10036867	1	1	+	10032903	10036867	16,78,139
chr2L	10037229	10038267	1	4	+	10037229	10038267	16,78,139
chr2L	10038564	10038742	1	2	+	10038564	10038742	16,78,139
chr2L	1004297	1012419	1	1	+	1004297	1012419	0,255,127
chr2L	1004324	1360029	1	1	+	1004324	1360029	0,255,127
chr2L	1004620	1013290	1	1	+	1004620	1013290	0,255,127
chr2L	100466	100621	1	1533	+	100466	100621	16,78,139
chr2L	1004694	1034195	2	2	+	1004694	1034195	0,255,127
chr2L	1004697	1011676	1	1	+	1004697	1011676	0,255,127
chr2L	1004697	1011699	1	1	+	1004697	1011699	0,255,127
chr2L	1004697	1128368	1	1	+	1004697	1128368	0,255,127
chr2L	1004707	1128342	1	1	+	1004707	1128342	0,255,127
chr2L	1004719	1012333	1	1	+	1004719	1012333	0,255,127
chr2L	1004773	1008410	1	1	+	1004773	1008410	0,255,127
chr2L	1004774	1012004	1	1	+	1004774	1012004	0,255,127
chr2L	1004775	1008410	1	1	+	1004775	1008410	0,255,127
chr2L	1004777	1009825	1	1	+	1004777	1009825	0,255,127
chr2L	1004783	1009825	1	1	+	1004783	1009825	0,255,127
chr2L	1004800	1012368	1	1	+	1004800	1012368	0,255,127
chr2L	1004802	1012434	1	1	+	1004802	1012434	0,255,127
chr2L	1004803	1009825	2	2	+	1004803	1009825	0,255,127
chr2L	1004814	1013344	1	1	+	1004814	1013344	0,255,127
chr2L	1004820	1012442	1	1	+	1004820	1012442	0,255,127
chr2L	1004822	1012718	1	1	+	1004822	1012718	0,255,127
chr2L	1004826	1010595	1	3	+	1004826	1010595	0,255,127
chr2L	1004829	1012718	1	4	+	1004829	1012718	0,255,127
chr2L	1004841	1012368	1	1	+	1004841	1012368	0,255,127
chr2L	1004843	1010721	2	2	+	1004843	1010721	0,255,127
chr2L	1004843	1013370	1	1	+	1004843	1013370	0,255,127
chr2L	1004849	1009954	1	1	+	1004849	1009954	0,255,127
chr2L	10048531	10048763	1	1	+	10048531	10048763	0,205,102
chr2L	1004868	1012758	1	1	+	1004868	1012758	0,255,127
chr2L	1005026	1011997	1	1	+	1005026	1011997	0,255,127
chr2L	10050592	10050751	1	27	+	10050592	10050751	16,78,139
chr2L	1005067	1010561	1	1	+	1005067	1010561	0,255,127
chr2L	10055651	10055864	1	1	+	10055651	10055864	0,255,127
chr2L	1005588	1010657	1	1	+	1005588	1010657	0,255,127
chr2L	10057154	10057671	1	2	+	10057154	10057671	16,78,139
chr2L	1005735	1012493	1	1	+	1005735	1012493	0,255,127
chr2L	10058084	10058248	1	8	+	10058084	10058248	16,78,139
chr2L	10060558	10062614	2	2	+	10060558	10062614	0,205,102
chr2L	10060949	10062614	1	1	+	10060949	10062614	16,78,139
chr2L	10062039	10062614	1	1	+	10062039	10062614	16,78,139
chr2L	10063003	10063130	1	1	+	10063003	10063130	0,255,127
chr2L	10063391	10063550	1	45	+	10063391	10063550	16,78,139
chr2L	10063604	10063762	1	109	+	10063604	10063762	16,78,139
chr2L	10064664	10064839	1	1	+	10064664	10064839	0,205,102
chr2L	10065265	10065663	1	45	+	10065265	10065663	16,78,139
chr2L	100653	100811	101	1801	+	100653	100811	16,78,139
chr2L	100653	100885	1	2	+	100653	100885	0,205,102
chr2L	100655	100813	1	1	+	100655	100813	0,255,127
chr2L	10066067	10066236	1	17	+	10066067	10066236	16,78,139
chr2L	10066326	10068272	1	178	+	10066326	10068272	16,78,139
chr2L	10067196	10254851	1	1	+	10067196	10254851	0,255,127
chr2L	10068305	10068685	1	90	+	10068305	10068685	16,78,139
chr2L	10069054	10069393	1	1	+	10069054	10069393	0,255,127
chr2L	10069622	10073224	1	4	+	10069622	10073224	16,78,139
chr2L	10071810	10071925	1	1	+	10071810	10071925	0,255,127
chr2L	10073334	10074188	1	10	+	10073334	10074188	16,78,139
chr2L	10074227	10074395	1	11	+	10074227	10074395	16,78,139
chr2L	10074478	10075270	1	33	+	10074478	10075270	16,78,139
chr2L	10075320	10075968	1	207	+	10075320	10075968	16,78,139
chr2L	10076215	10080424	1	6	+	10076215	10080424	16,78,139
chr2L	10080441	10081297	1	22	+	10080441	10081297	16,78,139
chr2L	10081896	10086250	1	24	+	10081896	10086250	16,78,139
chr2L	1008320	1008443	1	1	+	1008320	1008443	0,255,127
chr2L	10083970	10084535	1	1	+	10083970	10084535	0,255,127
chr2L	1008405	1008805	1	1	+	1008405	1008805	0,255,127
chr2L	1008490	1008642	1	1	+	1008490	1008642	0,255,127
chr2L	1008578	1008953	1	1	+	1008578	1008953	0,255,127
chr2L	10086256	10096963	1	22	+	10086256	10096963	0,205,102
chr2L	1008659	1010247	1	1	+	1008659	1010247	0,205,102
chr2L	10087469	10087593	1	7	+	10087469	10087593	0,255,127
chr2L	1008833	1012454	1	1	+	1008833	1012454	0,255,127
chr2L	1008883	1010595	1	1	+	1008883	1010595	0,255,127
chr2L	1008883	1012117	1	1	+	1008883	1012117	0,255,127
chr2L	1008885	1010295	1	2	+	1008885	1010295	0,255,127
chr2L	1008906	1009825	1	1	+	1008906	1009825	0,255,127
chr2L	100892	101055	1	5	+	100892	101055	0,255,127
chr2L	100892	101065	1	754	+	100892	101065	16,78,139
chr2L	1009472	1009696	1	1	+	1009472	1009696	0,255,127
chr2L	10094727	10094843	1	16	+	10094727	10094843	0,255,127
chr2L	1009485	1009756	1	1	+	1009485	1009756	0,255,127
chr2L	1009501	1009645	1	1	+	1009501	1009645	0,255,127
chr2L	1009618	1009750	1	1	+	1009618	1009750	0,255,127
chr2L	1009660	1013393	1	1	+	1009660	1013393	0,255,127
chr2L	10096812	10096963	1	1	+	10096812	10096963	0,205,102
chr2L	10097003	10097832	1	5	+	10097003	10097832	16,78,139
chr2L	1009706	1010457	2	2	+	1009706	1010457	0,255,127
chr2L	1009723	1009842	1	1	+	1009723	1009842	0,255,127
chr2L	1009725	1010291	1	1	+	1009725	1010291	0,255,127
chr2L	1009733	1009927	1	1	+	1009733	1009927	0,255,127
chr2L	1009740	1010754	2	2	+	1009740	1010754	0,255,127
chr2L	1009771	1013350	1	1	+	1009771	1013350	0,255,127
chr2L	1009776	1010308	1	1	+	1009776	1010308	0,255,127
chr2L	10097960	10126050	1	23	+	10097960	10126050	0,205,102
chr2L	1009799	1009917	1	1	+	1009799	1009917	0,255,127
chr2L	1009816	1010205	1	1	+	1009816	1010205	0,255,127
chr2L	1009845	1010457	1	1	+	1009845	1010457	0,255,127
chr2L	1009854	1009969	1	1	+	1009854	1009969	0,255,127
chr2L	1009881	1010107	1	1	+	1009881	1010107	0,255,127
chr2L	1009883	1010147	1	1	+	1009883	1010147	0,255,127
chr2L	1009888	1010245	1	1	+	1009888	1010245	0,255,127
chr2L	1009890	1010173	2	2	+	1009890	1010173	0,255,127
chr2L	1009942	1010353	1	2	+	1009942	1010353	0,255,127
chr2L	1009948	1010359	1	1	+	1009948	1010359	0,255,127
chr2L	1009954	1010131	1	1	+	1009954	1010131	0,205,102
chr2L	1009954	1010247	1	2	+	1009954	1010247	0,205,102
chr2L	1009958	1010538	1	1	+	1009958	1010538	0,255,127
chr2L	1009965	1010623	1	1	+	1009965	1010623	0,255,127
chr2L	1009978	1010462	1	7	+	1009978	1010462	0,255,127
chr2L	1010003	1010121	1	3	+	1010003	1010121	0,255,127
chr2L	1010005	1010121	1	1	+	1010005	1010121	0,255,127
chr2L	1010009	1010135	1	1	+	1010009	1010135	0,255,127
chr2L	1010066	1010609	1	1	+	1010066	1010609	0,255,127
chr2L	1010075	1010516	1	1	+	1010075	1010516	0,255,127
chr2L	1010101	1010353	1	1	+	1010101	1010353	0,255,127
chr2L	1010149	1010494	1	1	+	1010149	1010494	0,255,127
chr2L	1010158	1012563	1	1	+	1010158	1012563	0,255,127
chr2L	1010161	1012095	1	1	+	1010161	1012095	0,255,127
chr2L	1010174	1012483	1	1	+	1010174	1012483	0,255,127
chr2L	1010204	1010636	1	1	+	1010204	1010636	0,255,127
chr2L	1010204	1010717	1	2	+	1010204	1010717	0,255,127
chr2L	1010204	1013011	1	1	+	1010204	1013011	0,255,127
chr2L	1010206	1010733	1	1	+	1010206	1010733	0,255,127
chr2L	1010206	1012556	1	1	+	1010206	1012556	0,255,127
chr2L	1010220	1010462	1	1	+	1010220	1010462	0,255,127
chr2L	1010225	1010359	1	1	+	1010225	1010359	0,205,102
chr2L	1010231	1010416	1	3	+	1010231	1010416	0,255,127
chr2L	10102811	10103337	1	1	+	10102811	10103337	0,255,127
chr2L	1010283	1010575	1	2	+	1010283	1010575	0,255,127
chr2L	1010287	1010636	1	1	+	1010287	1010636	0,255,127
chr2L	1010288	1010703	1	2	+	1010288	1010703	0,255,127
chr2L	1010306	1010707	1	1	+	1010306	1010707	0,255,127
chr2L	1010306	1010717	1	7	+	1010306	1010717	0,255,127
chr2L	1010308	1010636	1	1	+	1010308	1010636	0,255,127
chr2L	1010310	1010721	1	4	+	1010310	1010721	0,255,127
chr2L	1010315	1012442	1	1	+	1010315	1012442	0,255,127
chr2L	1010316	1010727	1	1	+	1010316	1010727	0,255,127
chr2L	1010321	1010678	1	1	+	1010321	1010678	0,255,127
chr2L	1010321	1012368	1	1	+	1010321	1012368	0,255,127
chr2L	1010323	1010727	1	1	+	1010323	1010727	0,255,127
chr2L	1010332	1010595	1	1	+	1010332	1010595	0,255,127
chr2L	1010334	1012095	1	3	+	1010334	1012095	0,255,127
chr2L	1010335	1010457	1	1	+	1010335	1010457	0,255,127
chr2L	1010335	1012718	1	1	+	1010335	1012718	0,255,127
chr2L	1010336	1012718	1	1	+	1010336	1012718	0,255,127
chr2L	1010337	1013370	1	1	+	1010337	1013370	0,255,127
chr2L	1010343	1012454	1	1	+	1010343	1012454	0,255,127
chr2L	1010345	1010707	1	1	+	1010345	1010707	0,255,127
chr2L	1010346	1010703	2	2	+	1010346	1010703	0,255,127
chr2L	1010349	1010465	1	1	+	1010349	1010465	0,255,127
chr2L	1010351	1010471	1	1	+	1010351	1010471	0,255,127
chr2L	1010351	1010524	1	1	+	1010351	1010524	0,205,102
chr2L	1010351	1012413	1	1	+	1010351	1012413	0,255,127
chr2L	1010353	1010644	1	15	+	1010353	1010644	0,255,127
chr2L	1010355	1010483	1	1	+	1010355	1010483	0,255,127
chr2L	1010355	1010670	2	2	+	1010355	1010670	0,255,127
chr2L	1010360	1012381	1	1	+	1010360	1012381	0,255,127
chr2L	1010371	1010678	1	3	+	1010371	1010678	0,255,127
chr2L	1010371	1010751	1	1	+	1010371	1010751	0,205,102
chr2L	1010372	1010500	1	1	+	1010372	1010500	0,255,127
chr2L	1010388	1010524	1	1	+	1010388	1010524	0,255,127
chr2L	1010440	1010609	1	1	+	1010440	1010609	0,255,127
chr2L	1010440	1010678	2	2	+	1010440	1010678	0,255,127
chr2L	1010442	1010680	1	1	+	1010442	1010680	0,255,127
chr2L	1010461	1010671	1	9	+	1010461	1010671	0,255,127
chr2L	1010480	1010671	1	1	+	1010480	1010671	0,255,127
chr2L	1010483	1010676	1	3	+	1010483	1010676	0,255,127
chr2L	1010487	1010721	1	5	+	1010487	1010721	0,255,127
chr2L	1010491	1012718	1	1	+	1010491	1012718	0,255,127
chr2L	1010492	1010680	1	2	+	1010492	1010680	0,255,127
chr2L	1010495	1010647	1	1	+	1010495	1010647	0,255,127
chr2L	1010497	1010696	1	1	+	1010497	1010696	0,255,127
chr2L	1010498	1010680	1	1	+	1010498	1010680	0,255,127
chr2L	1010519	1010698	1	2	+	1010519	1010698	0,255,127
chr2L	1010525	1010670	1	1	+	1010525	1010670	0,255,127
chr2L	10105284	10105407	1	4	+	10105284	10105407	0,205,102
chr2L	1010536	1010717	1	9	+	1010536	1010717	0,255,127
chr2L	1010539	1010698	2	2	+	1010539	1010698	0,255,127
chr2L	1010539	1010717	1	1	+	1010539	1010717	0,255,127
chr2L	1010544	1010721	1	3	+	1010544	1010721	0,255,127
chr2L	1010544	1010727	1	5	+	1010544	1010727	0,255,127
chr2L	1010571	1010707	1	1	+	1010571	1010707	0,255,127
chr2L	1010598	1010809	1	1	+	1010598	1010809	0,255,127
chr2L	1010608	1011180	1	1	+	1010608	1011180	0,255,127
chr2L	1010609	1010727	1	3	+	1010609	1010727	0,255,127
chr2L	1010611	1010727	1	1	+	1010611	1010727	0,255,127
chr2L	1010615	1010733	1	1	+	1010615	1010733	0,255,127
chr2L	1010620	1010821	1	1	+	1010620	1010821	0,255,127
chr2L	1010633	1012368	1	4	+	1010633	1012368	0,255,127
chr2L	1010662	1010777	1	1	+	1010662	1010777	0,205,102
chr2L	1010662	1011168	1	7	+	1010662	1011168	0,205,102
chr2L	1010665	1011171	1	1	+	1010665	1011171	0,255,127
chr2L	1010700	1010821	1	1	+	1010700	1010821	0,255,127
chr2L	1010704	1010854	1	3	+	1010704	1010854	0,255,127
chr2L	1010707	1011000	1	1	+	1010707	1011000	0,255,127
chr2L	1010721	1011171	1	1	+	1010721	1011171	0,255,127
chr2L	1010728	1011197	1	5	+	1010728	1011197	0,255,127
chr2L	1010730	1011161	1	1	+	1010730	1011161	0,255,127
chr2L	1010732	1010880	1	4	+	1010732	1010880	0,255,127
chr2L	1010732	1011039	1	1	+	1010732	1011039	0,255,127
chr2L	1010746	1010893	1	1	+	1010746	1010893	0,255,127
chr2L	1010756	1012787	1	1	+	1010756	1012787	0,205,102
chr2L	1010759	1010905	2	2	+	1010759	1010905	0,205,102
chr2L	1010778	1011161	2	4	+	1010778	1011161	0,255,127
chr2L	1010793	1011162	1	1	+	1010793	1011162	0,205,102
chr2L	1010819	1011083	1	1	+	1010819	1011083	0,255,127
chr2L	1010833	1011158	1	3	+	1010833	1011158	0,255,127
chr2L	1010864	1011168	1	3	+	1010864	1011168	0,255,127
chr2L	1010870	1011247	1	1	+	1010870	1011247	0,255,127
chr2L	1010891	1011360	1	1	+	1010891	1011360	0,255,127
chr2L	1010910	1011218	1	1	+	1010910	1011218	0,255,127
chr2L	1010912	1011039	1	1	+	1010912	1011039	0,255,127
chr2L	1010913	1011062	2	2	+	1010913	1011062	0,255,127
chr2L	1010935	1011360	1	1	+	1010935	1011360	0,255,127
chr2L	1010935	1013305	1	1	+	1010935	1013305	0,255,127
chr2L	1010939	1012501	1	1	+	1010939	1012501	0,255,127
chr2L	1010949	1011408	1	1	+	1010949	1011408	0,255,127
chr2L	1010960	1011317	1	1	+	1010960	1011317	0,255,127
chr2L	1010971	1011137	1	2	+	1010971	1011137	0,255,127
chr2L	1010974	1011320	1	1	+	1010974	1011320	0,255,127
chr2L	1010983	1011327	1	1	+	1010983	1011327	0,255,127
chr2L	1010983	1011502	1	1	+	1010983	1011502	0,255,127
chr2L	1011005	1011180	1	1	+	1011005	1011180	0,255,127
chr2L	1011010	1011360	2	2	+	1011010	1011360	0,255,127
chr2L	1011028	1011180	1	1	+	1011028	1011180	0,255,127
chr2L	1011028	1011372	1	1	+	1011028	1011372	0,255,127
chr2L	1011034	1011180	1	1	+	1011034	1011180	0,255,127
chr2L	1011037	1011218	2	2	+	1011037	1011218	0,255,127
chr2L	1011037	1011222	2	2	+	1011037	1011222	0,205,102
chr2L	1011037	1011275	1	1	+	1011037	1011275	0,255,127
chr2L	1011037	1011380	1	2	+	1011037	1011380	0,255,127
chr2L	1011037	1382531	1	1	+	1011037	1382531	0,255,127
chr2L	1011043	1011385	1	2	+	1011043	1011385	0,255,127
chr2L	1011043	1011743	1	1	+	1011043	1011743	0,255,127
chr2L	1011046	1011171	1	1	+	1011046	1011171	0,255,127
chr2L	1011046	1011448	1	1	+	1011046	1011448	0,255,127
chr2L	1011048	1011217	1	5	+	1011048	1011217	0,255,127
chr2L	1011048	1011227	1	1	+	1011048	1011227	0,255,127
chr2L	1011069	1011282	1	2	+	1011069	1011282	0,255,127
chr2L	1011074	1011288	1	4	+	1011074	1011288	0,255,127
chr2L	1011080	1011294	1	2	+	1011080	1011294	0,255,127
chr2L	1011098	1011299	2	2	+	1011098	1011299	0,255,127
chr2L	1011113	1011324	1	1	+	1011113	1011324	0,255,127
chr2L	1011115	1011327	1	2	+	1011115	1011327	0,255,127
chr2L	1011122	1011304	1	1	+	1011122	1011304	0,205,102
chr2L	1011122	1011336	1	1	+	1011122	1011336	0,255,127
chr2L	1011122	1012483	1	1	+	1011122	1012483	0,255,127
chr2L	1011129	1011282	1	1	+	1011129	1011282	0,255,127
chr2L	1011150	1011364	1	1	+	1011150	1011364	0,255,127
chr2L	1011166	1016250	1	1	+	1011166	1016250	0,255,127
chr2L	1011276	1011417	1	1	+	1011276	1011417	0,255,127
chr2L	1011285	1011437	2	2	+	1011285	1011437	0,205,102
chr2L	1011308	1012084	1	1	+	1011308	1012084	0,255,127
chr2L	1011325	1011653	1	1	+	1011325	1011653	0,255,127
chr2L	1011351	1011699	1	2	+	1011351	1011699	0,255,127
chr2L	1011357	1011476	1	1	+	1011357	1011476	0,255,127
chr2L	1011370	1011638	1	1	+	1011370	1011638	0,255,127
chr2L	1011376	1012370	1	3	+	1011376	1012370	0,255,127
chr2L	1011387	1011731	1	1	+	1011387	1011731	0,255,127
chr2L	1011420	1012477	1	1	+	1011420	1012477	0,255,127
chr2L	1011431	1012529	1	1	+	1011431	1012529	0,255,127
chr2L	101144	101298	1	1098	+	101144	101298	16,78,139
chr2L	101144	101329	1	2	+	101144	101329	0,205,102
chr2L	1011444	1011776	1	1	+	1011444	1011776	0,255,127
chr2L	1011444	1012501	1	1	+	1011444	1012501	0,255,127
chr2L	1011484	1011610	1	1	+	1011484	1011610	0,255,127
chr2L	1011493	1011653	1	1	+	1011493	1011653	0,255,127
chr2L	1011570	1011883	1	1	+	1011570	1011883	0,255,127
chr2L	1011609	1012493	1	2	+	1011609	1012493	0,255,127
chr2L	1011643	1012128	1	1	+	1011643	1012128	0,255,127
chr2L	10117337	10117895	1	1	+	10117337	10117895	0,205,102
chr2L	1011755	1011946	1	1	+	1011755	1011946	0,255,127
chr2L	1011756	1011902	1	1	+	1011756	1011902	0,255,127
chr2L	1011779	1012045	1	1	+	1011779	1012045	0,255,127
chr2L	1011793	1012501	1	3	+	1011793	1012501	0,255,127
chr2L	1011897	1012333	1	1	+	1011897	1012333	0,255,127
chr2L	1011908	1012442	1	1	+	1011908	1012442	0,255,127
chr2L	1011911	1012718	1	1	+	1011911	1012718	0,255,127
chr2L	1011913	1012341	1	1	+	1011913	1012341	0,255,127
chr2L	1011913	1012501	1	1	+	1011913	1012501	0,255,127
chr2L	1011929	1012434	1	1	+	1011929	1012434	0,255,127
chr2L	1011931	1012084	1	12	+	1011931	1012084	0,255,127
chr2L	1011968	1012419	1	1	+	1011968	1012419	0,255,127
chr2L	1011995	1012454	1	1	+	1011995	1012454	0,255,127
chr2L	1012020	1012529	1	1	+	1012020	1012529	0,255,127
chr2L	1012025	1013309	1	2	+	1012025	1013309	0,255,127
chr2L	1012031	1012609	1	1	+	1012031	1012609	0,255,127
chr2L	1012047	1012310	1	1	+	1012047	1012310	0,255,127
chr2L	1012062	1012401	1	1	+	1012062	1012401	0,255,127
chr2L	1012084	1012329	1	1	+	1012084	1012329	0,255,127
chr2L	1012086	1012558	1	1	+	1012086	1012558	0,255,127
chr2L	1012092	1012442	1	1	+	1012092	1012442	0,255,127
chr2L	1012096	1012442	1	5	+	1012096	1012442	0,255,127
chr2L	1012096	1012454	1	1	+	1012096	1012454	0,255,127
chr2L	1012097	1012442	1	1	+	1012097	1012442	0,255,127
chr2L	1012098	1012710	1	1	+	1012098	1012710	0,255,127
chr2L	1012102	1012228	1	1	+	1012102	1012228	0,255,127
chr2L	1012103	1012442	2	2	+	1012103	1012442	0,255,127
chr2L	1012109	1012691	1	1	+	1012109	1012691	0,255,127
chr2L	1012137	1012493	1	1	+	1012137	1012493	0,255,127
chr2L	1012156	1012370	1	1	+	1012156	1012370	0,255,127
chr2L	1012181	1012397	1	1	+	1012181	1012397	0,255,127
chr2L	10121988	10125084	1	1	+	10121988	10125084	16,78,139
chr2L	1012227	1012368	1	3	+	1012227	1012368	0,255,127
chr2L	1012227	1012691	1	1	+	1012227	1012691	0,255,127
chr2L	1012236	1012418	1	1	+	1012236	1012418	0,255,127
chr2L	1012249	1012378	1	1	+	1012249	1012378	0,255,127
chr2L	1012255	1012454	1	1	+	1012255	1012454	0,255,127
chr2L	1012257	1118578	1	1	+	1012257	1118578	0,255,127
chr2L	1012259	1012442	1	1	+	1012259	1012442	0,255,127
chr2L	1012259	1012454	1	1	+	1012259	1012454	0,255,127
chr2L	1012260	1012454	1	4	+	1012260	1012454	0,255,127
chr2L	1012260	1012718	1	1	+	1012260	1012718	0,255,127
chr2L	1012261	1012401	1	1	+	1012261	1012401	0,255,127
chr2L	1012261	1012454	1	1	+	1012261	1012454	0,255,127
chr2L	1012262	1182339	1	1	+	1012262	1182339	0,255,127
chr2L	1012268	1012691	1	2	+	1012268	1012691	0,255,127
chr2L	1012297	1083167	1	1	+	1012297	1083167	0,255,127
chr2L	1012332	1012454	1	1	+	1012332	1012454	0,255,127
chr2L	10123350	10124253	2	2	+	10123350	10124253	0,255,127
chr2L	1012343	1012710	1	3	+	1012343	1012710	0,255,127
chr2L	1012344	1012710	1	1	+	1012344	1012710	0,255,127
chr2L	1012383	1012835	1	1	+	1012383	1012835	0,255,127
chr2L	1012389	1013305	1	1	+	1012389	1013305	0,255,127
chr2L	1012393	1012524	1	1	+	1012393	1012524	0,255,127
chr2L	1012393	1012558	1	1	+	1012393	1012558	0,255,127
chr2L	1012393	1012609	1	1	+	1012393	1012609	0,255,127
chr2L	10123968	10124465	1	1	+	10123968	10124465	0,255,127
chr2L	1012399	1012529	1	13	+	1012399	1012529	0,255,127
chr2L	1012401	1012524	1	1	+	1012401	1012524	0,255,127
chr2L	1012415	1012657	2	2	+	1012415	1012657	0,205,102
chr2L	1012429	1012895	1	1	+	1012429	1012895	0,255,127
chr2L	1012429	1013290	1	1	+	1012429	1013290	0,255,127
chr2L	1012431	1013402	1	1	+	1012431	1013402	0,255,127
chr2L	1012431	1046948	1	1	+	1012431	1046948	0,255,127
chr2L	1012438	1013337	1	1	+	1012438	1013337	0,255,127
chr2L	1012444	1012899	1	1	+	1012444	1012899	0,255,127
chr2L	1012469	1012718	1	1	+	1012469	1012718	0,255,127
chr2L	1012475	1013290	1	1	+	1012475	1013290	0,255,127
chr2L	1012477	1012649	1	1	+	1012477	1012649	0,255,127
chr2L	1012479	1012691	1	1	+	1012479	1012691	0,205,102
chr2L	1012485	1012637	1	3	+	1012485	1012637	0,255,127
chr2L	1012489	1013030	1	1	+	1012489	1013030	0,255,127
chr2L	1012492	1012718	1	1	+	1012492	1012718	0,255,127
chr2L	1012492	1013309	1	3	+	1012492	1013309	0,255,127
chr2L	1012498	1014116	1	1	+	1012498	1014116	0,255,127
chr2L	1012503	1014006	1	1	+	1012503	1014006	0,205,102
chr2L	1012509	1012635	1	2	+	1012509	1012635	0,205,102
chr2L	1012515	1012924	1	1	+	1012515	1012924	0,255,127
chr2L	1012517	1013084	1	4	+	1012517	1013084	0,255,127
chr2L	1012547	1012681	1	2	+	1012547	1012681	0,255,127
chr2L	1012563	1012710	1	2	+	1012563	1012710	0,255,127
chr2L	1012564	1012718	1	1	+	1012564	1012718	0,255,127
chr2L	1012571	1012718	1	118	+	1012571	1012718	0,255,127
chr2L	1012576	1012691	1	1	+	1012576	1012691	0,255,127
chr2L	1012597	1012718	1	1	+	1012597	1012718	0,255,127
chr2L	1012599	1012718	1	1	+	1012599	1012718	0,255,127
chr2L	1012600	1012863	1	1	+	1012600	1012863	0,255,127
chr2L	1012601	1012718	1	8	+	1012601	1012718	0,255,127
chr2L	1012603	1012718	1	8	+	1012603	1012718	0,255,127
chr2L	1012616	1013140	1	1	+	1012616	1013140	0,255,127
chr2L	10126180	10127567	1	163	+	10126180	10127567	16,78,139
chr2L	1012654	1013387	1	1	+	1012654	1013387	0,255,127
chr2L	1012654	1013799	1	1	+	1012654	1013799	0,255,127
chr2L	1012658	1013451	1	1	+	1012658	1013451	0,255,127
chr2L	1012658	1013754	1	2	+	1012658	1013754	0,255,127
chr2L	1012662	1013350	1	3	+	1012662	1013350	0,255,127
chr2L	1012668	1012853	1	1	+	1012668	1012853	0,255,127
chr2L	1012670	1013396	1	3	+	1012670	1013396	0,255,127
chr2L	1012670	1013438	1	1	+	1012670	1013438	0,255,127
chr2L	1012671	1012818	1	1	+	1012671	1012818	0,255,127
chr2L	1012674	1012957	1	1	+	1012674	1012957	0,255,127
chr2L	1012679	1013900	1	1	+	1012679	1013900	0,255,127
chr2L	1012687	1016868	1	1	+	1012687	1016868	0,205,102
chr2L	10127559	10127819	1	83	+	10127559	10127819	16,78,139
chr2L	10127827	10136695	1	52	+	10127827	10136695	16,78,139
chr2L	10127827	10178090	1	2	+	10127827	10178090	0,205,102
chr2L	10130095	10213938	1	1	+	10130095	10213938	0,255,127
chr2L	10130095	10368071	1	1	+	10130095	10368071	0,255,127
chr2L	10130111	10392522	1	1	+	10130111	10392522	0,255,127
chr2L	1013184	1013608	1	1	+	1013184	1013608	0,255,127
chr2L	1013186	1013305	1	1	+	1013186	1013305	0,255,127
chr2L	1013186	1013610	1	2	+	1013186	1013610	0,255,127
chr2L	1013194	1013309	1	2	+	1013194	1013309	0,255,127
chr2L	1013196	1013317	1	1	+	1013196	1013317	0,255,127
chr2L	1013205	1013610	1	1	+	1013205	1013610	0,255,127
chr2L	1013237	1140256	1	1	+	1013237	1140256	0,255,127
chr2L	1013254	1013438	1	3	+	1013254	1013438	0,255,127
chr2L	1013256	1013398	1	1	+	1013256	1013398	0,255,127
chr2L	1013276	1013393	1	1	+	1013276	1013393	0,255,127
chr2L	1013281	1137113	1	1	+	1013281	1137113	0,255,127
chr2L	1013298	1013546	1	1	+	1013298	1013546	0,255,127
chr2L	1013302	1046888	1	1	+	1013302	1046888	0,255,127
chr2L	1013338	1048009	1	5	+	1013338	1048009	0,255,127
chr2L	1013351	1013480	1	7	+	1013351	1013480	0,255,127
chr2L	101336	235847	1	1	+	101336	235847	0,205,102
chr2L	1013367	1013496	1	2	+	1013367	1013496	0,255,127
chr2L	1013372	1013511	1	2	+	1013372	1013511	0,255,127
chr2L	1013380	1013540	1	1	+	1013380	1013540	0,255,127
chr2L	1013396	1013523	1	1	+	1013396	1013523	0,255,127
chr2L	1013402	1013948	1	2	+	1013402	1013948	0,255,127
chr2L	1013411	1013820	1	9	+	1013411	1013820	0,255,127
chr2L	1013413	1013785	1	1	+	1013413	1013785	0,255,127
chr2L	1013442	1013620	1	1	+	1013442	1013620	0,205,102
chr2L	1013484	1013750	1	1	+	1013484	1013750	0,255,127
chr2L	1013511	1013974	1	1	+	1013511	1013974	0,205,102
chr2L	1013580	1015709	1	1	+	1013580	1015709	0,255,127
chr2L	1013599	1013724	1	1	+	1013599	1013724	0,255,127
chr2L	1013602	1014227	1	1	+	1013602	1014227	0,255,127
chr2L	1013602	1016778	1	2	+	1013602	1016778	0,255,127
chr2L	1013626	1013794	1	1	+	1013626	1013794	0,255,127
chr2L	1013630	1013750	1	1	+	1013630	1013750	0,255,127
chr2L	1013647	1013766	1	1	+	1013647	1013766	0,255,127
chr2L	1013650	1034171	1	1	+	1013650	1034171	0,255,127
chr2L	10137509	10178090	1	185	+	10137509	10178090	16,78,139
chr2L	1013793	1014048	2	2	+	1013793	1014048	0,255,127
chr2L	10138162	10143453	1	3	+	10138162	10143453	0,255,127
chr2L	1013862	1014071	1	1	+	1013862	1014071	0,255,127
chr2L	1013882	1014023	2	2	+	1013882	1014023	0,255,127
chr2L	1013887	1014014	1	1	+	1013887	1014014	0,255,127
chr2L	1013893	1014023	1	1	+	1013893	1014023	0,255,127
chr2L	1013897	1014027	1	2	+	1013897	1014027	0,255,127
chr2L	1013900	1014034	1	1	+	1013900	1014034	0,255,127
chr2L	1013921	1015707	1	1	+	1013921	1015707	0,255,127
chr2L	1014007	1014164	1	1	+	1014007	1014164	0,255,127
chr2L	1014014	1014144	1	1	+	1014014	1014144	0,255,127
chr2L	1014117	1014259	1	1	+	1014117	1014259	0,255,127
chr2L	1014434	1014599	1	68	+	1014434	1014599	16,78,139
chr2L	1014666	1014826	1	336	+	1014666	1014826	16,78,139
chr2L	10147139	10150387	2	2	+	10147139	10150387	16,78,139
chr2L	1014924	1015084	1	182	+	1014924	1015084	16,78,139
chr2L	1015120	1015243	1	1	+	1015120	1015243	0,255,127
chr2L	1015197	1015370	1	1	+	1015197	1015370	0,255,127
chr2L	1015206	1015364	10	1965	+	1015206	1015364	16,78,139
chr2L	1015347	1015530	1	1	+	1015347	1015530	0,255,127
chr2L	1015413	1015949	2	2	+	1015413	1015949	0,255,127
chr2L	10154132	10154303	1	5	+	10154132	10154303	16,78,139
chr2L	1015424	1015716	1	1	+	1015424	1015716	0,255,127
chr2L	10154435	10154750	1	2	+	10154435	10154750	16,78,139
chr2L	10156323	10163840	1	15	+	10156323	10163840	0,205,102
chr2L	101569	101738	1	1	+	101569	101738	0,255,127
chr2L	101569	101766	2	2	+	101569	101766	0,205,102
chr2L	101569	101925	1	469	+	101569	101925	16,78,139
chr2L	1015877	1016042	107	3470	+	1015877	1016042	16,78,139
chr2L	1015983	1016745	1	1	+	1015983	1016745	0,255,127
chr2L	1016026	1016188	1098	21779	+	1016026	1016188	16,78,139
chr2L	1016026	1016203	1	2	+	1016026	1016203	0,205,102
chr2L	1016026	1016209	1	1	+	1016026	1016209	0,255,127
chr2L	1016153	1016679	1	1	+	1016153	1016679	0,255,127
chr2L	1016183	1016313	1	3	+	1016183	1016313	0,255,127
chr2L	1016195	1016328	1	3	+	1016195	1016328	0,205,102
chr2L	1016217	1016454	1	1	+	1016217	1016454	0,255,127
chr2L	1016239	1016985	1	1	+	1016239	1016985	0,255,127
chr2L	1016243	1016527	1	1	+	1016243	1016527	0,255,127
chr2L	1016246	1016361	1	1	+	1016246	1016361	0,255,127
chr2L	10162884	10284382	1	1	+	10162884	10284382	0,255,127
chr2L	10163001	10273911	2	2	+	10163001	10273911	0,205,102
chr2L	10163171	10163959	1	1	+	10163171	10163959	0,255,127
chr2L	10163181	10213938	1	1	+	10163181	10213938	0,255,127
chr2L	1016408	1016808	1	1	+	1016408	1016808	0,255,127
chr2L	1016446	1034112	1	1	+	1016446	1034112	0,255,127
chr2L	1016514	1016795	1	1	+	1016514	1016795	0,255,127
chr2L	1016747	1017060	1	1	+	1016747	1017060	0,255,127
chr2L	10167596	10168036	1	2	+	10167596	10168036	0,255,127
chr2L	1016768	1016958	2	2	+	1016768	1016958	0,205,102
chr2L	10169010	10169146	2	2	+	10169010	10169146	0,255,127
chr2L	10169089	10178090	1	7	+	10169089	10178090	0,205,102
chr2L	1016916	1017177	2	2	+	1016916	1017177	0,255,127
chr2L	1017005	1019330	2	2	+	1017005	1019330	0,205,102
chr2L	1017203	1017325	2	2	+	1017203	1017325	0,255,127
chr2L	10172444	10178090	1	4	+	10172444	10178090	0,205,102
chr2L	1017591	1017760	1	133	+	1017591	1017760	16,78,139
chr2L	1017718	1018179	1	1	+	1017718	1018179	0,205,102
chr2L	1017718	1019317	1	229	+	1017718	1019317	16,78,139
chr2L	10177699	10178984	1	1	+	10177699	10178984	0,255,127
chr2L	10177732	10178090	1	2	+	10177732	10178090	0,205,102
chr2L	10178035	10178206	1	3	+	10178035	10178206	0,205,102
chr2L	10178273	10180156	1	1	+	10178273	10180156	0,205,102
chr2L	10178427	10179037	1	2	+	10178427	10179037	0,205,102
chr2L	10178427	10179486	1	19	+	10178427	10179486	0,205,102
chr2L	10178427	10179802	1	1	+	10178427	10179802	0,205,102
chr2L	10178427	10180004	2	2	+	10178427	10180004	0,205,102
chr2L	10178427	10180156	1	184	+	10178427	10180156	0,205,102
chr2L	10179469	10179718	1	1	+	10179469	10179718	0,205,102
chr2L	10179469	10180156	1	4	+	10179469	10180156	0,205,102
chr2L	10179469	10180312	1	1	+	10179469	10180312	0,205,102
chr2L	10182880	10183057	1	26	+	10182880	10183057	16,78,139
chr2L	10183050	10183689	1	1	+	10183050	10183689	0,255,127
chr2L	10183154	10183499	1	13	+	10183154	10183499	16,78,139
chr2L	10183209	10183415	1	1	+	10183209	10183415	0,205,102
chr2L	10183694	10184289	1	57	+	10183694	10184289	16,78,139
chr2L	10184317	10184641	1	68	+	10184317	10184641	16,78,139
chr2L	10184667	10184983	1	1	+	10184667	10184983	0,255,127
chr2L	10184776	10184924	1	1	+	10184776	10184924	0,255,127
chr2L	10185218	10309720	1	1	+	10185218	10309720	0,255,127
chr2L	10185310	10185691	1	8	+	10185310	10185691	16,78,139
chr2L	10185787	10185956	1	38	+	10185787	10185956	16,78,139
chr2L	10186014	10186539	1	32	+	10186014	10186539	16,78,139
chr2L	101864	102028	1	715	+	101864	102028	16,78,139
chr2L	10187071	10188206	1	6	+	10187071	10188206	16,78,139
chr2L	10188210	10188397	1	11	+	10188210	10188397	16,78,139
chr2L	10188416	10188543	1	1	+	10188416	10188543	0,255,127
chr2L	10188908	10189071	1	11	+	10188908	10189071	16,78,139
chr2L	10188908	10189074	1	1	+	10188908	10189074	0,205,102
chr2L	10189362	10189666	1	2	+	10189362	10189666	16,78,139
chr2L	1019054	1033736	1	1	+	1019054	1033736	0,255,127
chr2L	10191134	10191288	1	1	+	10191134	10191288	16,78,139
chr2L	10191819	10193267	1	4	+	10191819	10193267	16,78,139
chr2L	1019271	1020543	1	1	+	1019271	1020543	0,205,102
chr2L	1019271	1023642	1	1	+	1019271	1023642	0,205,102
chr2L	1019271	1033736	1	168	+	1019271	1033736	16,78,139
chr2L	10194032	10194200	1	66	+	10194032	10194200	16,78,139
chr2L	10194052	10194200	1	1	+	10194052	10194200	0,205,102
chr2L	10194263	10194417	1	10	+	10194263	10194417	16,78,139
chr2L	10194455	10194921	1	8	+	10194455	10194921	16,78,139
chr2L	10194934	10195259	1	30	+	10194934	10195259	16,78,139
chr2L	10195751	10195919	1	6	+	10195751	10195919	16,78,139
chr2L	10196035	10196811	1	10	+	10196035	10196811	16,78,139
chr2L	10196887	10197041	1	6	+	10196887	10197041	16,78,139
chr2L	10197207	10198497	1	36	+	10197207	10198497	16,78,139
chr2L	10200060	10200214	1	1	+	10200060	10200214	0,255,127
chr2L	10200186	10200340	1	226	+	10200186	10200340	16,78,139
chr2L	10200186	10200465	1	4	+	10200186	10200465	0,205,102
chr2L	10200306	10200465	1	337	+	10200306	10200465	16,78,139
chr2L	10200616	10200918	1	122	+	10200616	10200918	16,78,139
chr2L	10201098	10201279	1	55	+	10201098	10201279	16,78,139
chr2L	10201285	10201770	1	1	+	10201285	10201770	0,255,127
chr2L	10201305	10202030	1	4	+	10201305	10202030	0,255,127
chr2L	10201338	10201780	1	1	+	10201338	10201780	0,205,102
chr2L	10201355	10201840	1	1	+	10201355	10201840	0,255,127
chr2L	10201359	10202075	1	1	+	10201359	10202075	0,255,127
chr2L	10201385	10202020	1	1	+	10201385	10202020	0,255,127
chr2L	10201446	10201769	1	1	+	10201446	10201769	0,255,127
chr2L	10201446	10202030	1	1	+	10201446	10202030	0,255,127
chr2L	10201478	10201648	10	2953	+	10201478	10201648	16,78,139
chr2L	10201579	10202099	1	1	+	10201579	10202099	0,205,102
chr2L	10201603	10202075	1	1	+	10201603	10202075	0,255,127
chr2L	10201644	10201907	1	1	+	10201644	10201907	0,255,127
chr2L	10201680	10201867	1	3	+	10201680	10201867	0,205,102
chr2L	10201692	10202075	1	1	+	10201692	10202075	0,255,127
chr2L	10201742	10201871	1	1	+	10201742	10201871	0,255,127
chr2L	10201754	10201901	1	1	+	10201754	10201901	0,255,127
chr2L	10201761	10202032	1	1	+	10201761	10202032	0,255,127
chr2L	10201801	10202020	1	1	+	10201801	10202020	0,255,127
chr2L	10201804	10202032	1	1	+	10201804	10202032	0,255,127
chr2L	10201843	10202057	1	1	+	10201843	10202057	0,255,127
chr2L	10201879	10202011	2	2	+	10201879	10202011	0,255,127
chr2L	10201913	10242981	1	1	+	10201913	10242981	0,255,127
chr2L	10201978	10214203	1	1	+	10201978	10214203	0,255,127
chr2L	10202029	10594565	1	1	+	10202029	10594565	0,255,127
chr2L	10202041	10593107	1	1	+	10202041	10593107	0,255,127
chr2L	10202094	10537037	1	2	+	10202094	10537037	0,255,127
chr2L	10202100	10320714	1	1	+	10202100	10320714	0,255,127
chr2L	10202100	10537041	1	1	+	10202100	10537041	0,255,127
chr2L	10202660	10311323	1	1	+	10202660	10311323	0,255,127
chr2L	10202671	10202793	1	1	+	10202671	10202793	0,255,127
chr2L	10202982	10203433	1	387	+	10202982	10203433	16,78,139
chr2L	10203504	10203625	1	8	+	10203504	10203625	0,255,127
chr2L	10203589	10204221	1	1	+	10203589	10204221	0,205,102
chr2L	10203610	10203845	1	1	+	10203610	10203845	0,205,102
chr2L	10203610	10204221	10	1238	+	10203610	10204221	16,78,139
chr2L	10204091	10204331	1	1	+	10204091	10204331	0,205,102
chr2L	102050	104409	1	1	+	102050	104409	0,255,127
chr2L	10205582	10206024	1	1	+	10205582	10206024	0,205,102
chr2L	10207380	10207543	1	56	+	10207380	10207543	16,78,139
chr2L	1020756	1023145	2	2	+	1020756	1023145	0,205,102
chr2L	10207806	10207969	1	15	+	10207806	10207969	16,78,139
chr2L	10208301	10208457	1	3	+	10208301	10208457	16,78,139
chr2L	10208532	10208694	1	6	+	10208532	10208694	16,78,139
chr2L	10208752	10209297	1	1	+	10208752	10209297	0,205,102
chr2L	10210117	10210274	1	403	+	10210117	10210274	16,78,139
chr2L	10210851	10211236	1	1	+	10210851	10211236	0,255,127
chr2L	10211232	10211389	1	9	+	10211232	10211389	16,78,139
chr2L	10211232	10211447	1	71	+	10211232	10211447	16,78,139
chr2L	10211551	10212928	1	1	+	10211551	10212928	0,255,127
chr2L	10212031	10212191	1	2	+	10212031	10212191	16,78,139
chr2L	10212213	10212376	1	58	+	10212213	10212376	16,78,139
chr2L	10212352	10212517	1	70	+	10212352	10212517	16,78,139
chr2L	10213200	10213363	1	1709	+	10213200	10213363	16,78,139
chr2L	10213200	10213398	1	1	+	10213200	10213398	0,205,102
chr2L	10213672	10214114	1	1	+	10213672	10214114	0,255,127
chr2L	10213704	10213885	1	1	+	10213704	10213885	0,255,127
chr2L	10213706	10213859	2	4	+	10213706	10213859	0,255,127
chr2L	10213706	10213860	1	1	+	10213706	10213860	0,255,127
chr2L	10213706	10213938	1	3	+	10213706	10213938	0,255,127
chr2L	10213706	10213944	1	1	+	10213706	10213944	0,255,127
chr2L	10214005	10214174	1037	17545	+	10214005	10214174	16,78,139
chr2L	10214122	10437896	1	1	+	10214122	10437896	0,255,127
chr2L	10214477	10215025	1	1	+	10214477	10215025	0,255,127
chr2L	10214478	10215025	1	1	+	10214478	10215025	0,255,127
chr2L	10214502	10214687	1	1	+	10214502	10214687	0,255,127
chr2L	10214526	10215025	1	1	+	10214526	10215025	0,205,102
chr2L	10214597	10215025	1	1	+	10214597	10215025	0,255,127
chr2L	10214941	10215107	11	2132	+	10214941	10215107	16,78,139
chr2L	10215103	10216061	1	1	+	10215103	10216061	0,205,102
chr2L	10215138	10215297	1	2	+	10215138	10215297	0,205,102
chr2L	10216291	10216409	1	1	+	10216291	10216409	0,255,127
chr2L	10216309	10216442	1	1	+	10216309	10216442	0,205,102
chr2L	10216400	10216559	10	9902	+	10216400	10216559	16,78,139
chr2L	10216402	10216561	1	2	+	10216402	10216561	0,255,127
chr2L	10216504	10216742	1	1	+	10216504	10216742	0,255,127
chr2L	10216750	10216910	1	783	+	10216750	10216910	16,78,139
chr2L	10217130	10217390	1	513	+	10217130	10217390	16,78,139
chr2L	10217130	10217402	1	71	+	10217130	10217402	0,205,102
chr2L	10217432	10217649	1	1	+	10217432	10217649	0,205,102
chr2L	10217483	10217649	1	359	+	10217483	10217649	16,78,139
chr2L	10217740	10217932	1	1	+	10217740	10217932	0,205,102
chr2L	10217768	10217932	1	6438	+	10217768	10217932	16,78,139
chr2L	10217793	10217932	1	1	+	10217793	10217932	0,255,127
chr2L	10217883	10218099	1	1	+	10217883	10218099	0,255,127
chr2L	10217909	10218065	1	3986	+	10217909	10218065	16,78,139
chr2L	10218122	10218281	1	1672	+	10218122	10218281	16,78,139
chr2L	10218352	10218828	1	961	+	10218352	10218828	16,78,139
chr2L	10218839	10219928	1	1	+	10218839	10219928	0,205,102
chr2L	10218839	10220109	1	1	+	10218839	10220109	0,205,102
chr2L	10218839	10220742	104	2621	+	10218839	10220742	16,78,139
chr2L	10218839	10220773	1	3	+	10218839	10220773	0,205,102
chr2L	10218839	10220846	1	56	+	10218839	10220846	0,205,102
chr2L	10218839	10220884	1	57	+	10218839	10220884	0,205,102
chr2L	10218839	10220918	1	110	+	10218839	10220918	0,205,102
chr2L	10218839	10220953	1	10	+	10218839	10220953	0,205,102
chr2L	10218839	10221185	1	2	+	10218839	10221185	0,205,102
chr2L	10219210	10220846	1	1	+	10219210	10220846	0,205,102
chr2L	10221395	10221563	1	113	+	10221395	10221563	16,78,139
chr2L	10221571	10221736	1	3	+	10221571	10221736	0,205,102
chr2L	10221805	10222082	1	1	+	10221805	10222082	0,255,127
chr2L	10221891	10222268	1	1	+	10221891	10222268	0,255,127
chr2L	10221931	10222173	1	1	+	10221931	10222173	0,255,127
chr2L	10222079	10222279	1	1	+	10222079	10222279	0,255,127
chr2L	10222085	10222251	1	5	+	10222085	10222251	0,205,102
chr2L	10222089	10222309	2	2	+	10222089	10222309	0,205,102
chr2L	10222093	10222251	10	725	+	10222093	10222251	16,78,139
chr2L	10222142	10222377	1	1	+	10222142	10222377	0,255,127
chr2L	10222460	10222576	1	2	+	10222460	10222576	0,205,102
chr2L	10222481	10537050	1	1	+	10222481	10537050	0,255,127
chr2L	10222652	10223190	1	1	+	10222652	10223190	16,78,139
chr2L	10222824	10223190	1	1	+	10222824	10223190	0,205,102
chr2L	10223009	10223190	1	2	+	10223009	10223190	16,78,139
chr2L	10224351	10224839	1	3	+	10224351	10224839	0,205,102
chr2L	10224391	10537045	1	1	+	10224391	10537045	0,255,127
chr2L	10224598	10224839	1	10	+	10224598	10224839	0,205,102
chr2L	10224751	10225442	1	1	+	10224751	10225442	0,255,127
chr2L	10224836	10225001	1	6	+	10224836	10225001	0,205,102
chr2L	10224842	10225007	100	4025	+	10224842	10225007	16,78,139
chr2L	10224955	10225138	1	1	+	10224955	10225138	0,205,102
chr2L	10224983	10225513	1	1	+	10224983	10225513	0,255,127
chr2L	10225099	10225328	10	1149	+	10225099	10225328	16,78,139
chr2L	10225117	10225328	1	1	+	10225117	10225328	0,205,102
chr2L	10225382	10225553	1	889	+	10225382	10225553	16,78,139
chr2L	10225674	10226714	1	1	+	10225674	10226714	0,205,102
chr2L	10225744	10225923	1	3	+	10225744	10225923	0,205,102
chr2L	10225761	10225923	11	3289	+	10225761	10225923	16,78,139
chr2L	10225761	10226384	1	2	+	10225761	10226384	0,205,102
chr2L	10225761	10226461	2	2	+	10225761	10226461	0,205,102
chr2L	10225761	10226714	1	565	+	10225761	10226714	16,78,139
chr2L	10225761	10226823	1	2	+	10225761	10226823	0,205,102
chr2L	10225911	10226744	2	2	+	10225911	10226744	0,255,127
chr2L	10225915	10226384	1	1	+	10225915	10226384	0,205,102
chr2L	10225915	10226461	1	1	+	10225915	10226461	0,205,102
chr2L	10225915	10226714	1	1216	+	10225915	10226714	16,78,139
chr2L	10225915	10226761	1	1	+	10225915	10226761	0,205,102
chr2L	10225915	10226823	1	11	+	10225915	10226823	16,78,139
chr2L	10228868	10228998	1	1	+	10228868	10228998	0,255,127
chr2L	10228898	10229162	1	1	+	10228898	10229162	0,255,127
chr2L	10229076	10229234	11	3170	+	10229076	10229234	16,78,139
chr2L	10229296	10229463	1	385	+	10229296	10229463	16,78,139
chr2L	10229561	10229754	1	97	+	10229561	10229754	16,78,139
chr2L	10229905	10230289	1	1	+	10229905	10230289	0,205,102
chr2L	10229905	10230948	1	123	+	10229905	10230948	16,78,139
chr2L	10229905	10231243	1	1	+	10229905	10231243	0,205,102
chr2L	10229905	10231332	1	636	+	10229905	10231332	16,78,139
chr2L	10229905	10231416	1	19	+	10229905	10231416	0,205,102
chr2L	10229905	10231422	1	1	+	10229905	10231422	0,205,102
chr2L	10229905	10231444	1	56	+	10229905	10231444	16,78,139
chr2L	10229905	10231575	1	1	+	10229905	10231575	0,205,102
chr2L	10229905	10231588	1	56	+	10229905	10231588	16,78,139
chr2L	1023024	1023444	1	1	+	1023024	1023444	0,255,127
chr2L	10230326	10230808	1	1	+	10230326	10230808	0,255,127
chr2L	10230400	10230948	1	1	+	10230400	10230948	0,205,102
chr2L	10230400	10231588	1	1	+	10230400	10231588	0,205,102
chr2L	10230620	10230950	1	1	+	10230620	10230950	0,205,102
chr2L	10230988	10231332	1	3	+	10230988	10231332	0,205,102
chr2L	10230988	10231416	1	1	+	10230988	10231416	0,205,102
chr2L	10231423	10231588	1	4	+	10231423	10231588	0,205,102
chr2L	10232609	10233530	10	1532	+	10232609	10233530	16,78,139
chr2L	10232609	10233806	1	130	+	10232609	10233806	16,78,139
chr2L	10233511	10233666	1	1	+	10233511	10233666	0,205,102
chr2L	10233511	10233806	10	2392	+	10233511	10233806	16,78,139
chr2L	10233733	10234028	1	1	+	10233733	10234028	0,255,127
chr2L	10233737	10233958	1	1	+	10233737	10233958	0,255,127
chr2L	10233817	10594555	1	1	+	10233817	10594555	0,205,102
chr2L	10234900	10235077	1	102	+	10234900	10235077	16,78,139
chr2L	10235364	10235534	1	58	+	10235364	10235534	16,78,139
chr2L	10235364	10235536	1	1	+	10235364	10235536	0,205,102
chr2L	10235613	10235776	1	14	+	10235613	10235776	16,78,139
chr2L	10235755	10236080	1	9	+	10235755	10236080	16,78,139
chr2L	10236236	10236424	1	1	+	10236236	10236424	16,78,139
chr2L	10236241	10236424	1	2	+	10236241	10236424	16,78,139
chr2L	10236497	10236976	1	2	+	10236497	10236976	16,78,139
chr2L	10237478	10237965	1	3	+	10237478	10237965	0,205,102
chr2L	10238413	10238923	1	1	+	10238413	10238923	0,205,102
chr2L	10238433	10240541	1	1	+	10238433	10240541	0,255,127
chr2L	1023847	1024217	1	1	+	1023847	1024217	0,255,127
chr2L	10239404	10240576	1	1	+	10239404	10240576	0,255,127
chr2L	10239528	10240541	2	2	+	10239528	10240541	0,255,127
chr2L	10239535	10240541	1	7181	+	10239535	10240541	16,78,139
chr2L	10239812	10240541	1	2	+	10239812	10240541	0,205,102
chr2L	1024001	1024160	2	2	+	1024001	1024160	0,255,127
chr2L	10240034	10240541	1	1	+	10240034	10240541	16,78,139
chr2L	10240541	10240729	1	2376	+	10240541	10240729	16,78,139
chr2L	10240798	10240963	1	1	+	10240798	10240963	0,255,127
chr2L	10240798	10240993	1	1	+	10240798	10240993	0,255,127
chr2L	10240836	10241427	1	1	+	10240836	10241427	0,255,127
chr2L	10240893	10241026	1	1	+	10240893	10241026	0,255,127
chr2L	10241008	10241182	101	6820	+	10241008	10241182	16,78,139
chr2L	10241589	10241803	1	1	+	10241589	10241803	0,255,127
chr2L	10241730	10241895	1	2467	+	10241730	10241895	16,78,139
chr2L	10242878	10243038	1	1	+	10242878	10243038	0,255,127
chr2L	10243156	10243675	1	1	+	10243156	10243675	0,255,127
chr2L	10243160	10243464	1	1	+	10243160	10243464	0,255,127
chr2L	10244108	10244268	1	137	+	10244108	10244268	16,78,139
chr2L	10244337	10244506	1	191	+	10244337	10244506	16,78,139
chr2L	10244495	10244650	1	177	+	10244495	10244650	16,78,139
chr2L	10244654	10245132	1	1	+	10244654	10245132	0,255,127
chr2L	10244729	10245927	1	1	+	10244729	10245927	0,205,102
chr2L	10244773	10245927	1	4	+	10244773	10245927	0,205,102
chr2L	10244803	10244959	1	792	+	10244803	10244959	16,78,139
chr2L	10245042	10245269	1	1	+	10245042	10245269	0,205,102
chr2L	10245053	10245269	10	1247	+	10245053	10245269	16,78,139
chr2L	10245301	10245459	1	1535	+	10245301	10245459	16,78,139
chr2L	10245540	10245704	10	2350	+	10245540	10245704	16,78,139
chr2L	10245689	10245851	1	1	+	10245689	10245851	0,255,127
chr2L	10245989	10246234	1	51	+	10245989	10246234	0,205,102
chr2L	10245989	10246573	1	4	+	10245989	10246573	0,205,102
chr2L	10245989	10246801	1	3	+	10245989	10246801	0,205,102
chr2L	10245989	10246805	1	18	+	10245989	10246805	0,205,102
chr2L	10245989	10246897	1	2	+	10245989	10246897	0,205,102
chr2L	10245989	10246917	1	73	+	10245989	10246917	0,205,102
chr2L	10245989	10246949	1	1571	+	10245989	10246949	16,78,139
chr2L	10245989	10247074	1	13	+	10245989	10247074	16,78,139
chr2L	10246061	10246234	1	8	+	10246061	10246234	0,205,102
chr2L	10246483	10246805	1	3	+	10246483	10246805	0,205,102
chr2L	10246483	10246897	1	1	+	10246483	10246897	0,205,102
chr2L	10246483	10246917	1	1	+	10246483	10246917	0,205,102
chr2L	10246483	10246949	1	8	+	10246483	10246949	0,205,102
chr2L	10246511	10246836	1	2	+	10246511	10246836	0,205,102
chr2L	10247184	10247567	1	1	+	10247184	10247567	0,255,127
chr2L	10247625	10247810	1	1	+	10247625	10247810	0,255,127
chr2L	10247637	10248601	2	2	+	10247637	10248601	0,255,127
chr2L	10247642	10247910	1	1	+	10247642	10247910	0,255,127
chr2L	10247664	10247926	1	1	+	10247664	10247926	0,255,127
chr2L	10247687	10247955	1	92	+	10247687	10247955	0,255,127
chr2L	10247723	10247897	1	2	+	10247723	10247897	0,205,102
chr2L	10247723	10247901	103	17263	+	10247723	10247901	16,78,139
chr2L	10247725	10247903	1	5	+	10247725	10247903	0,255,127
chr2L	10247726	10247901	1	2	+	10247726	10247901	0,255,127
chr2L	10247819	10248290	1	1	+	10247819	10248290	0,255,127
chr2L	10247839	10248050	1	1	+	10247839	10248050	0,255,127
chr2L	10248076	10248246	1	13	+	10248076	10248246	0,205,102
chr2L	10248085	10248246	119	8124	+	10248085	10248246	16,78,139
chr2L	10248402	10248574	1	1	+	10248402	10248574	0,205,102
chr2L	10248411	10248574	1	2030	+	10248411	10248574	16,78,139
chr2L	10248672	10248834	105	2881	+	10248672	10248834	16,78,139
chr2L	10248687	10248834	1	1	+	10248687	10248834	0,205,102
chr2L	10248839	10249144	1	4	+	10248839	10249144	0,205,102
chr2L	10248864	10249144	112	4527	+	10248864	10249144	16,78,139
chr2L	10249088	10249204	1	1	+	10249088	10249204	0,255,127
chr2L	10249166	10250330	1	1	+	10249166	10250330	0,205,102
chr2L	10249182	10250330	1	2	+	10249182	10250330	0,205,102
chr2L	10249209	10249542	1	6	+	10249209	10249542	16,78,139
chr2L	10249209	10249905	1	4	+	10249209	10249905	0,205,102
chr2L	10249209	10249973	1	4	+	10249209	10249973	0,205,102
chr2L	10249209	10249977	1	4	+	10249209	10249977	0,205,102
chr2L	10249209	10249981	1	9	+	10249209	10249981	0,205,102
chr2L	10249209	10250071	1	10	+	10249209	10250071	0,205,102
chr2L	10249209	10250173	1	4	+	10249209	10250173	0,205,102
chr2L	10249209	10250330	1	4692	+	10249209	10250330	16,78,139
chr2L	10249209	10250966	1	1	+	10249209	10250966	0,205,102
chr2L	10249214	10250330	1	7	+	10249214	10250330	0,255,127
chr2L	10249339	10249542	1	4	+	10249339	10249542	0,205,102
chr2L	10249339	10249909	1	1	+	10249339	10249909	0,205,102
chr2L	10249339	10249981	1	1	+	10249339	10249981	0,205,102
chr2L	10249339	10250330	2	21	+	10249339	10250330	0,205,102
chr2L	10249339	10250402	1	1	+	10249339	10250402	0,205,102
chr2L	10249367	10249879	1	1	+	10249367	10249879	0,255,127
chr2L	10249785	10249981	1	1	+	10249785	10249981	0,205,102
chr2L	10250012	10250330	1	1	+	10250012	10250330	0,205,102
chr2L	10250065	10250272	1	1	+	10250065	10250272	0,205,102
chr2L	10250506	10250664	1	1	+	10250506	10250664	0,255,127
chr2L	10250777	10250945	1	11	+	10250777	10250945	16,78,139
chr2L	10252014	10252324	1	1125	+	10252014	10252324	16,78,139
chr2L	10252377	10252533	1	1347	+	10252377	10252533	16,78,139
chr2L	10252381	10252533	1	15	+	10252381	10252533	0,205,102
chr2L	10253024	10253188	1	345	+	10253024	10253188	16,78,139
chr2L	10253303	10253454	1	1	+	10253303	10253454	0,255,127
chr2L	10253305	10253456	1	603	+	10253305	10253456	16,78,139
chr2L	10253561	10253717	1	135	+	10253561	10253717	16,78,139
chr2L	10254065	10254242	1	585	+	10254065	10254242	16,78,139
chr2L	10254245	10254758	1	1	+	10254245	10254758	0,255,127
chr2L	10254275	10254434	10	1533	+	10254275	10254434	24116205
chr2L	10254276	10254435	1	1	+	10254276	10254435	0,255,127
chr2L	10254447	10254826	1	4	+	10254447	10254826	0,255,127
chr2L	10254590	10254796	1	11	+	10254590	10254796	16,78,139
chr2L	10254746	10254877	1	1	+	10254746	10254877	0,255,127
chr2L	10254765	10254970	1	5	+	10254765	10254970	0,255,127
chr2L	10254870	10254995	2	2	+	10254870	10254995	0,255,127
chr2L	10254887	10255006	1	1	+	10254887	10255006	0,255,127
chr2L	10254898	10255169	1	1	+	10254898	10255169	0,255,127
chr2L	10254922	10255161	1	11	+	10254922	10255161	0,255,127
chr2L	10254956	10255127	2	2	+	10254956	10255127	0,205,102
chr2L	10254962	10255125	1	10	+	10254962	10255125	0,255,127
chr2L	10254964	10255127	1002	112763	+	10254964	10255127	16,78,139
chr2L	10255069	10255190	1	1	+	10255069	10255190	0,255,127
chr2L	10255164	10255291	1	3	+	10255164	10255291	0,255,127
chr2L	10255212	10255770	1	21	+	10255212	10255770	0,205,102
chr2L	10255220	10255501	1	17	+	10255220	10255501	0,205,102
chr2L	10255220	10255675	1	2	+	10255220	10255675	0,205,102
chr2L	10255220	10255701	1	3	+	10255220	10255701	0,205,102
chr2L	10255220	10255770	10	14592	+	10255220	10255770	16,78,139
chr2L	10255220	10256493	1	2	+	10255220	10256493	0,205,102
chr2L	10256456	10256959	1	371	+	10256456	10256959	16,78,139
chr2L	10256456	10257444	1	149	+	10256456	10257444	16,78,139
chr2L	10256456	10257827	1	346	+	10256456	10257827	16,78,139
chr2L	10256813	10256983	1	10	+	10256813	10256983	0,205,102
chr2L	10257072	10257444	1	316	+	10257072	10257444	16,78,139
chr2L	1025750	1033736	1	2	+	1025750	1033736	0,205,102
chr2L	10257666	10257827	104	2136	+	10257666	10257827	16,78,139
chr2L	10257666	10257830	1	3	+	10257666	10257830	0,205,102
chr2L	10257766	10257883	1	1	+	10257766	10257883	0,255,127
chr2L	10257943	10258113	1	456	+	10257943	10258113	16,78,139
chr2L	10258123	10258284	1	1533	+	10258123	10258284	16,78,139
chr2L	10258347	10258598	1	3994	+	10258347	10258598	16,78,139
chr2L	10258347	10258866	1	1	+	10258347	10258866	0,205,102
chr2L	10258418	10258598	1	1	+	10258418	10258598	0,205,102
chr2L	10258539	10258828	2	2	+	10258539	10258828	0,255,127
chr2L	10258606	10258777	101	10266	+	10258606	10258777	16,78,139
chr2L	10258865	10259078	135	4702	+	10258865	10259078	16,78,139
chr2L	10259123	10259290	10	1276	+	10259123	10259290	16,78,139
chr2L	10259363	10259525	1	771	+	10259363	10259525	16,78,139
chr2L	10259640	10260021	2	7	+	10259640	10260021	0,205,102
chr2L	10259640	10260079	1	4	+	10259640	10260079	0,205,102
chr2L	10259640	10260083	1	3	+	10259640	10260083	0,205,102
chr2L	10259640	10260126	1	1	+	10259640	10260126	0,205,102
chr2L	10259640	10260299	1	1	+	10259640	10260299	0,205,102
chr2L	10259640	10260303	1	651	+	10259640	10260303	16,78,139
chr2L	10259640	10260791	1	1	+	10259640	10260791	0,205,102
chr2L	10259892	10260048	2	2	+	10259892	10260048	0,205,102
chr2L	10259900	10260172	1	1	+	10259900	10260172	0,255,127
chr2L	10260301	10260779	1	1	+	10260301	10260779	0,205,102
chr2L	10260301	10260903	1	3	+	10260301	10260903	0,205,102
chr2L	10260386	10260779	1	8	+	10260386	10260779	0,205,102
chr2L	10260386	10260791	1	7	+	10260386	10260791	0,205,102
chr2L	10260386	10260903	1	4	+	10260386	10260903	0,205,102
chr2L	10260534	10260779	1	22	+	10260534	10260779	0,205,102
chr2L	10260534	10260791	1	67	+	10260534	10260791	16,78,139
chr2L	10260534	10260798	1	1	+	10260534	10260798	0,205,102
chr2L	10260534	10260903	1	7	+	10260534	10260903	16,78,139
chr2L	10262072	10262551	1	1	+	10262072	10262551	0,255,127
chr2L	10262572	10420735	1	1	+	10262572	10420735	0,255,127
chr2L	10262783	10263014	1	1	+	10262783	10263014	0,255,127
chr2L	10262788	10262997	1	1	+	10262788	10262997	0,255,127
chr2L	10262843	10262964	1	1	+	10262843	10262964	0,255,127
chr2L	10262861	10263006	1	1	+	10262861	10263006	0,255,127
chr2L	10262872	10263128	1	1	+	10262872	10263128	0,255,127
chr2L	10262908	10263128	1	1	+	10262908	10263128	0,255,127
chr2L	10263086	10263217	1	1	+	10263086	10263217	0,255,127
chr2L	10264211	10264598	1	1	+	10264211	10264598	0,205,102
chr2L	10264214	10264598	1	270	+	10264214	10264598	16,78,139
chr2L	10264214	10264601	1	2262	+	10264214	10264601	16,78,139
chr2L	10264259	10264603	1	3	+	10264259	10264603	0,255,127
chr2L	10264259	10264635	1	1	+	10264259	10264635	0,255,127
chr2L	10264259	10264816	1	1	+	10264259	10264816	0,255,127
chr2L	10264405	10264603	1	3	+	10264405	10264603	0,255,127
chr2L	10264469	10264598	1	1	+	10264469	10264598	0,255,127
chr2L	10264471	10264598	1	1	+	10264471	10264598	0,255,127
chr2L	10264583	10264741	1	8	+	10264583	10264741	0,205,102
chr2L	10264583	10264749	1	4	+	10264583	10264749	0,205,102
chr2L	10264583	10264813	1009	20509	+	10264583	10264813	16,78,139
chr2L	10264583	10264820	1	5	+	10264583	10264820	0,205,102
chr2L	10264625	10264813	1	1	+	10264625	10264813	0,205,102
chr2L	10264745	10264887	1	3	+	10264745	10264887	0,255,127
chr2L	10264784	10264929	1	1	+	10264784	10264929	0,255,127
chr2L	10264818	10264996	1	2	+	10264818	10264996	0,205,102
chr2L	10264831	10264996	1	2	+	10264831	10264996	0,255,127
chr2L	10264835	10264996	100	6052	+	10264835	10264996	16,78,139
chr2L	10264837	10264994	1	9	+	10264837	10264994	0,255,127
chr2L	10264839	10264996	101	13016	+	10264839	10264996	16,78,139
chr2L	10264839	10265299	1	1	+	10264839	10265299	0,205,102
chr2L	10264843	10265000	1	3	+	10264843	10265000	0,255,127
chr2L	10265067	10320715	1	1	+	10265067	10320715	0,255,127
chr2L	10265255	10265469	1	3	+	10265255	10265469	0,205,102
chr2L	10265511	10265670	1	101	+	10265511	10265670	16,78,139
chr2L	10265721	10265876	1	298	+	10265721	10265876	16,78,139
chr2L	10265855	10593107	1	1	+	10265855	10593107	0,255,127
chr2L	10265898	10266333	1	1	+	10265898	10266333	0,205,102
chr2L	10265900	10266056	1	543	+	10265900	10266056	16,78,139
chr2L	10266060	10266247	1	505	+	10266060	10266247	16,78,139
chr2L	10266245	10266571	1	1	+	10266245	10266571	0,255,127
chr2L	10266263	10266429	1	1542	+	10266263	10266429	16,78,139
chr2L	10266802	10266962	1	16	+	10266802	10266962	16,78,139
chr2L	10267250	10267473	1	210	+	10267250	10267473	16,78,139
chr2L	10267686	10267848	1	116	+	10267686	10267848	16,78,139
chr2L	10267877	10268032	1	417	+	10267877	10268032	16,78,139
chr2L	10268202	10268862	1	1	+	10268202	10268862	0,205,102
chr2L	10269269	10269425	1	313	+	10269269	10269425	16,78,139
chr2L	10269269	10269427	1	3	+	10269269	10269427	0,205,102
chr2L	10269498	10269660	1	1	+	10269498	10269660	0,255,127
chr2L	10269500	10269662	100	1553	+	10269500	10269662	16,78,139
chr2L	10269658	10269812	10	1166	+	10269658	10269812	16,78,139
chr2L	10269658	10269819	1	5	+	10269658	10269819	0,205,102
chr2L	10270162	10270323	1	37	+	10270162	10270323	16,78,139
chr2L	10270340	10270490	1	1	+	10270340	10270490	0,205,102
chr2L	10270344	10270490	1	2	+	10270344	10270490	16,78,139
chr2L	10270344	10270498	1	47	+	10270344	10270498	16,78,139
chr2L	1027119	1027268	1	2	+	1027119	1027268	0,255,127
chr2L	10271367	10271609	1	3	+	10271367	10271609	16,78,139
chr2L	10271481	10603211	1	1	+	10271481	10603211	0,255,127
chr2L	10272628	10272747	1	1	+	10272628	10272747	0,255,127
chr2L	10272856	10273045	10	1554	+	10272856	10273045	16,78,139
chr2L	102729	103032	1	1	+	102729	103032	0,255,127
chr2L	10273072	10273246	1	685	+	10273072	10273246	16,78,139
chr2L	10273356	10273512	1	249	+	10273356	10273512	16,78,139
chr2L	1027337	1027452	2	2	+	1027337	1027452	0,255,127
chr2L	10273565	10273750	1	1	+	10273565	10273750	0,255,127
chr2L	10273832	10274015	1	482	+	10273832	10274015	16,78,139
chr2L	10273944	10274111	1	1	+	10273944	10274111	0,255,127
chr2L	10274040	10274214	1	178	+	10274040	10274214	16,78,139
chr2L	10274055	10274214	1	1426	+	10274055	10274214	16,78,139
chr2L	10274798	10275001	1	2	+	10274798	10275001	0,255,127
chr2L	10274818	10274983	1	1769	+	10274818	10274983	16,78,139
chr2L	10274822	10274987	1	1	+	10274822	10274987	0,255,127
chr2L	10274849	10275313	1	1	+	10274849	10275313	0,255,127
chr2L	10274976	10275187	1	1	+	10274976	10275187	0,255,127
chr2L	10275016	10275176	1	18645	+	10275016	10275176	16,78,139
chr2L	10275016	10275182	1	4	+	10275016	10275182	0,205,102
chr2L	10275086	10275370	1	1	+	10275086	10275370	0,255,127
chr2L	10275105	10275659	1	1	+	10275105	10275659	0,255,127
chr2L	10275163	10275517	2	2	+	10275163	10275517	0,255,127
chr2L	10275163	10275713	1	1	+	10275163	10275713	0,205,102
chr2L	10275334	10275498	1	3066	+	10275334	10275498	16,78,139
chr2L	10275337	10275498	1	15492	+	10275337	10275498	16,78,139
chr2L	10275343	10275504	1	1	+	10275343	10275504	0,255,127
chr2L	10275566	10275746	2	2	+	10275566	10275746	0,205,102
chr2L	10275579	10275746	1	3504	+	10275579	10275746	16,78,139
chr2L	10275621	10275780	1	1	+	10275621	10275780	0,205,102
chr2L	10275872	10276033	1	214	+	10275872	10276033	16,78,139
chr2L	10276062	10276441	1	290	+	10276062	10276441	16,78,139
chr2L	10276517	10276861	1	14	+	10276517	10276861	16,78,139
chr2L	10276517	10276973	1	1	+	10276517	10276973	0,255,127
chr2L	10276517	10277146	1	4	+	10276517	10277146	16,78,139
chr2L	10276517	10277444	1	97	+	10276517	10277444	16,78,139
chr2L	10276517	10277456	1	35	+	10276517	10277456	16,78,139
chr2L	10276517	10277863	1	166	+	10276517	10277863	16,78,139
chr2L	10277875	10278299	1	209	+	10277875	10278299	16,78,139
chr2L	10278546	10278698	1	418	+	10278546	10278698	16,78,139
chr2L	10279208	10279409	1	25	+	10279208	10279409	16,78,139
chr2L	10279363	10279569	1	47	+	10279363	10279569	16,78,139
chr2L	10279520	10279682	1	122	+	10279520	10279682	16,78,139
chr2L	10279636	10280102	1	148	+	10279636	10280102	16,78,139
chr2L	10280146	10280312	1	8	+	10280146	10280312	0,205,102
chr2L	10280270	10280430	1	142	+	10280270	10280430	16,78,139
chr2L	10282095	10282394	1	1	+	10282095	10282394	0,205,102
chr2L	10282128	10285945	1	1	+	10282128	10285945	0,255,127
chr2L	10282154	10282292	1	1	+	10282154	10282292	0,255,127
chr2L	10282229	10282394	1	2432	+	10282229	10282394	16,78,139
chr2L	10282408	10283348	1	1	+	10282408	10283348	0,255,127
chr2L	10282435	10286469	1	1	+	10282435	10286469	0,255,127
chr2L	10282521	10284097	1	1	+	10282521	10284097	0,205,102
chr2L	10282656	10284481	1	1	+	10282656	10284481	0,255,127
chr2L	10282755	10282914	1	2	+	10282755	10282914	0,205,102
chr2L	10283605	10283734	1	1	+	10283605	10283734	0,255,127
chr2L	10284267	10284421	1	1	+	10284267	10284421	0,205,102
chr2L	10284288	10284550	2	2	+	10284288	10284550	0,255,127
chr2L	10284301	10284481	1	1	+	10284301	10284481	0,255,127
chr2L	10284333	10284475	1	1	+	10284333	10284475	0,255,127
chr2L	10284359	10284487	2	2	+	10284359	10284487	0,255,127
chr2L	10284407	10284870	1	2	+	10284407	10284870	0,255,127
chr2L	10284411	10284550	1	2	+	10284411	10284550	0,255,127
chr2L	10284435	10284550	1	20	+	10284435	10284550	0,255,127
chr2L	10284435	10284907	1	1	+	10284435	10284907	0,255,127
chr2L	10284759	10285167	1	1	+	10284759	10285167	0,255,127
chr2L	10284799	10285560	1	1	+	10284799	10285560	0,255,127
chr2L	10284898	10285193	1	1	+	10284898	10285193	0,255,127
chr2L	10285336	10285761	1	1	+	10285336	10285761	0,255,127
chr2L	10285401	10285861	1	1	+	10285401	10285861	0,255,127
chr2L	10285425	10286336	1	4	+	10285425	10286336	0,255,127
chr2L	10285531	10285959	1	1	+	10285531	10285959	0,255,127
chr2L	102856	103055	1	35	+	102856	103055	16,78,139
chr2L	10285785	10285945	2	2	+	10285785	10285945	0,255,127
chr2L	10285823	10286156	2	2	+	10285823	10286156	0,255,127
chr2L	10286035	10286195	1	1	+	10286035	10286195	0,255,127
chr2L	10287097	10287219	1	1	+	10287097	10287219	0,255,127
chr2L	10287391	10287569	1	1	+	10287391	10287569	0,255,127
chr2L	10287884	10288040	1	3910	+	10287884	10288040	16,78,139
chr2L	10287884	10288046	1	3	+	10287884	10288046	0,205,102
chr2L	10288159	10288317	1	924	+	10288159	10288317	16,78,139
chr2L	10288449	10288613	1	362	+	10288449	10288613	16,78,139
chr2L	10288452	10288613	1	1	+	10288452	10288613	0,255,127
chr2L	10289761	10290143	1	1	+	10289761	10290143	0,255,127
chr2L	10290233	10290400	1	2098	+	10290233	10290400	16,78,139
chr2L	10290330	10290883	1	1	+	10290330	10290883	0,255,127
chr2L	10290440	10291156	10	1161	+	10290440	10291156	16,78,139
chr2L	10290580	10291156	1	1	+	10290580	10291156	0,205,102
chr2L	10291093	10292259	1	1062	+	10291093	10292259	16,78,139
chr2L	10291333	10374968	2	2	+	10291333	10374968	0,255,127
chr2L	10292811	10294523	1	20	+	10292811	10294523	16,78,139
chr2L	10294579	10294912	1	11	+	10294579	10294912	16,78,139
chr2L	10295009	10295258	1	30	+	10295009	10295258	16,78,139
chr2L	10296036	10693055	1	1	+	10296036	10693055	0,205,102
chr2L	10296052	10296221	1	13	+	10296052	10296221	0,255,127
chr2L	10296060	10296221	101	2773	+	10296060	10296221	24116205
chr2L	10296153	10296354	1	2	+	10296153	10296354	0,255,127
chr2L	10296202	10297021	1	1	+	10296202	10297021	0,255,127
chr2L	10296296	10296473	1	3	+	10296296	10296473	0,205,102
chr2L	10296318	10296473	10	2044	+	10296318	10296473	16,78,139
chr2L	10296515	10296674	10	2211	+	10296515	10296674	16,78,139
chr2L	10296517	10296676	1	1	+	10296517	10296676	0,255,127
chr2L	10296804	10296987	1	3	+	10296804	10296987	0,205,102
chr2L	10296809	10296987	1	863	+	10296809	10296987	16,78,139
chr2L	10296971	10297614	1	1	+	10296971	10297614	0,255,127
chr2L	10297106	10297261	1	2	+	10297106	10297261	0,205,102
chr2L	10297106	10297265	10	1070	+	10297106	10297265	16,78,139
chr2L	10297320	10297480	10	895	+	10297320	10297480	16,78,139
chr2L	10297452	10297606	1	1	+	10297452	10297606	0,255,127
chr2L	10297556	10297754	1	1128	+	10297556	10297754	16,78,139
chr2L	10297886	10298519	1	11	+	10297886	10298519	0,205,102
chr2L	10297886	10298830	1	205	+	10297886	10298830	16,78,139
chr2L	10298137	10393894	1	1	+	10298137	10393894	0,255,127
chr2L	10298246	10298418	1	1	+	10298246	10298418	0,205,102
chr2L	10298348	10298519	3	3	+	10298348	10298519	0,205,102
chr2L	10298937	10299093	1	3	+	10298937	10299093	0,255,127
chr2L	10298939	10299093	1	1390	+	10298939	10299093	16,78,139
chr2L	10299129	10299635	1	1	+	10299129	10299635	0,255,127
chr2L	10299169	10299810	1	1	+	10299169	10299810	0,255,127
chr2L	10299170	10299477	1	3	+	10299170	10299477	0,205,102
chr2L	10299170	10299481	1	80	+	10299170	10299481	0,205,102
chr2L	10299170	10299631	1	2	+	10299170	10299631	0,205,102
chr2L	10299170	10299635	1	11	+	10299170	10299635	0,255,127
chr2L	10299170	10299644	1	5	+	10299170	10299644	0,205,102
chr2L	10299170	10299646	1	1	+	10299170	10299646	0,205,102
chr2L	10299170	10299691	1	1	+	10299170	10299691	0,205,102
chr2L	10299170	10299706	1	1	+	10299170	10299706	0,205,102
chr2L	10299170	10299740	1	54	+	10299170	10299740	0,205,102
chr2L	10299170	10299748	1	8	+	10299170	10299748	0,205,102
chr2L	10299170	10299811	1	29	+	10299170	10299811	16,78,139
chr2L	10299566	10299811	1	1	+	10299566	10299811	0,205,102
chr2L	10299721	10299873	1	1	+	10299721	10299873	0,205,102
chr2L	10301040	10301356	1	1	+	10301040	10301356	0,255,127
chr2L	10303548	10303704	1	371	+	10303548	10303704	16,78,139
chr2L	10303548	10303832	1	7	+	10303548	10303832	16,78,139
chr2L	10304116	10304416	1	1	+	10304116	10304416	0,205,102
chr2L	10304127	10304473	1	1	+	10304127	10304473	0,255,127
chr2L	10304719	10304876	1	515	+	10304719	10304876	16,78,139
chr2L	10304723	10304880	1	1	+	10304723	10304880	0,255,127
chr2L	10305032	10305198	1	88	+	10305032	10305198	16,78,139
chr2L	10305459	10306561	1	107	+	10305459	10306561	16,78,139
chr2L	10307025	10307310	1	1	+	10307025	10307310	0,255,127
chr2L	10307069	10307243	11	1481	+	10307069	10307243	16,78,139
chr2L	10307160	10307434	2	2	+	10307160	10307434	0,255,127
chr2L	10307343	10307798	1	1	+	10307343	10307798	0,255,127
chr2L	10307371	10307910	1	1	+	10307371	10307910	0,255,127
chr2L	10307443	10307607	1	225	+	10307443	10307607	16,78,139
chr2L	10307615	10307923	2	2	+	10307615	10307923	0,205,102
chr2L	10307624	10307939	1	1	+	10307624	10307939	0,255,127
chr2L	10307660	10307937	1	1	+	10307660	10307937	0,255,127
chr2L	10307688	10307937	1	1	+	10307688	10307937	0,255,127
chr2L	10308212	10308433	1	1	+	10308212	10308433	0,255,127
chr2L	10308425	10308597	174	7647	+	10308425	10308597	16,78,139
chr2L	10308522	10308691	1	8	+	10308522	10308691	0,205,102
chr2L	10308681	10308862	1	2	+	10308681	10308862	0,205,102
chr2L	10308697	10308913	1	1	+	10308697	10308913	0,255,127
chr2L	10308703	10308862	103	4709	+	10308703	10308862	16,78,139
chr2L	10308703	10308866	1	1	+	10308703	10308866	0,255,127
chr2L	10308900	10309421	1	1161	+	10308900	10309421	16,78,139
chr2L	10309552	10309694	1	1	+	10309552	10309694	0,255,127
chr2L	10309582	10309712	1	1	+	10309582	10309712	0,255,127
chr2L	10309636	10309751	1	2	+	10309636	10309751	0,255,127
chr2L	10309636	10309787	1	1	+	10309636	10309787	0,255,127
chr2L	10309651	10309859	1	1	+	10309651	10309859	0,205,102
chr2L	10309654	10309787	1	1	+	10309654	10309787	0,255,127
chr2L	10309656	10309773	1	1	+	10309656	10309773	0,255,127
chr2L	10309736	10310208	1	1	+	10309736	10310208	0,255,127
chr2L	10309738	10309857	1	1	+	10309738	10309857	0,255,127
chr2L	10309739	10310304	1	1	+	10309739	10310304	0,255,127
chr2L	10309748	10310148	2	2	+	10309748	10310148	0,255,127
chr2L	10309772	10310169	1	2	+	10309772	10310169	0,255,127
chr2L	10309954	10310096	1	1	+	10309954	10310096	0,255,127
chr2L	10310259	10310469	1	1	+	10310259	10310469	0,255,127
chr2L	10310259	10310593	1068	17718	+	10310259	10310593	16,78,139
chr2L	10310293	10310593	1	1	+	10310293	10310593	0,205,102
chr2L	10310316	10310593	2	2	+	10310316	10310593	0,205,102
chr2L	10310330	10310649	1	1	+	10310330	10310649	0,255,127
chr2L	10310875	10311134	1	1	+	10310875	10311134	0,205,102
chr2L	10310875	10311154	2	2	+	10310875	10311154	0,205,102
chr2L	10311128	10311247	1	2	+	10311128	10311247	0,255,127
chr2L	10311494	10311759	1	1	+	10311494	10311759	0,255,127
chr2L	10311734	10311890	1	1	+	10311734	10311890	0,205,102
chr2L	10311734	10311904	1	14	+	10311734	10311904	0,205,102
chr2L	10311734	10311929	1	9	+	10311734	10311929	0,205,102
chr2L	10311734	10311948	110	2727	+	10311734	10311948	16,78,139
chr2L	10311736	10311950	1	1	+	10311736	10311950	0,255,127
chr2L	10311736	10514923	1	1	+	10311736	10514923	0,255,127
chr2L	10311996	10312114	1	1	+	10311996	10312114	0,255,127
chr2L	10312129	10312341	1	2	+	10312129	10312341	0,205,102
chr2L	10312376	10312505	1	1	+	10312376	10312505	0,255,127
chr2L	10312385	10313479	1	1	+	10312385	10313479	0,255,127
chr2L	10312430	10313486	1	1	+	10312430	10313486	0,255,127
chr2L	10312858	10313011	101	7825	+	10312858	10313011	16,78,139
chr2L	10312858	10313024	1	1	+	10312858	10313024	0,205,102
chr2L	10312977	10313133	1	1537	+	10312977	10313133	16,78,139
chr2L	10312985	10313135	2	2	+	10312985	10313135	0,205,102
chr2L	10312985	10313142	1	1	+	10312985	10313142	0,205,102
chr2L	10313190	10313355	1	243	+	10313190	10313355	16,78,139
chr2L	103135	103702	1	1	+	103135	103702	0,255,127
chr2L	10313638	10313950	1	86	+	10313638	10313950	16,78,139
chr2L	10313955	10314113	1	149	+	10313955	10314113	16,78,139
chr2L	10314189	10314345	1	27	+	10314189	10314345	16,78,139
chr2L	10315023	10315375	1	1	+	10315023	10315375	0,255,127
chr2L	10315023	10315394	1	1655	+	10315023	10315394	16,78,139
chr2L	10315373	10315538	1	1361	+	10315373	10315538	16,78,139
chr2L	10315423	10315781	1	1	+	10315423	10315781	0,255,127
chr2L	10315530	10315779	1	1	+	10315530	10315779	0,255,127
chr2L	10315896	10316096	1	1	+	10315896	10316096	0,205,102
chr2L	10315907	10316096	1	2	+	10315907	10316096	0,205,102
chr2L	10315907	10316241	1	474	+	10315907	10316241	16,78,139
chr2L	10316078	10316241	1	2	+	10316078	10316241	0,205,102
chr2L	10316320	10316488	1	1	+	10316320	10316488	0,255,127
chr2L	10316324	10316488	10	1603	+	10316324	10316488	16,78,139
chr2L	10316594	10317235	1	1	+	10316594	10317235	0,255,127
chr2L	103166	103384	1	1	+	103166	103384	0,255,127
chr2L	10316630	10316881	1	1	+	10316630	10316881	0,255,127
chr2L	10316817	10316981	12	1428	+	10316817	10316981	16,78,139
chr2L	10317257	10322228	1	2	+	10317257	10322228	0,205,102
chr2L	10317597	10317796	1	1	+	10317597	10317796	0,255,127
chr2L	10317707	10317885	1	1	+	10317707	10317885	0,255,127
chr2L	10318742	10318953	1	1	+	10318742	10318953	0,255,127
chr2L	10319010	10319180	1	1	+	10319010	10319180	0,205,102
chr2L	10319026	10319180	1	4316	+	10319026	10319180	16,78,139
chr2L	10319026	10319183	1	38	+	10319026	10319183	0,205,102
chr2L	10319207	10319369	1	1761	+	10319207	10319369	16,78,139
chr2L	10319216	10319369	1	1	+	10319216	10319369	0,255,127
chr2L	10319373	10319537	1	1524	+	10319373	10319537	16,78,139
chr2L	10319373	10319667	1	4	+	10319373	10319667	0,205,102
chr2L	10319510	10319667	1	1052	+	10319510	10319667	16,78,139
chr2L	10319514	10319667	2	2	+	10319514	10319667	0,255,127
chr2L	10319663	10319896	1	401	+	10319663	10319896	16,78,139
chr2L	10319663	10319899	1	1	+	10319663	10319899	0,205,102
chr2L	10320003	10321329	1	2	+	10320003	10321329	0,205,102
chr2L	10320003	10321555	1	3	+	10320003	10321555	0,205,102
chr2L	10320003	10321825	1	19	+	10320003	10321825	16,78,139
chr2L	10320003	10322941	1	1	+	10320003	10322941	0,205,102
chr2L	10320606	10321555	1	1	+	10320606	10321555	0,205,102
chr2L	10324259	10324428	2	2	+	10324259	10324428	16,78,139
chr2L	10327168	10327326	1	2	+	10327168	10327326	16,78,139
chr2L	10327404	10327736	1	8	+	10327404	10327736	16,78,139
chr2L	10327725	10327876	1	1	+	10327725	10327876	16,78,139
chr2L	10328145	10328525	1	1	+	10328145	10328525	0,255,127
chr2L	10328323	10328535	1	1	+	10328323	10328535	0,255,127
chr2L	10328347	10328521	1	2	+	10328347	10328521	0,205,102
chr2L	10328360	10328517	1	1	+	10328360	10328517	0,205,102
chr2L	10328360	10328519	1	1	+	10328360	10328519	0,255,127
chr2L	10328360	10328521	153	9446	+	10328360	10328521	16,78,139
chr2L	10328675	10329116	1	1	+	10328675	10329116	0,255,127
chr2L	10328690	10328853	10	2247	+	10328690	10328853	16,78,139
chr2L	10328690	10328904	1	1	+	10328690	10328904	0,205,102
chr2L	10329010	10329565	1	1	+	10329010	10329565	0,255,127
chr2L	10329055	10329266	1	1	+	10329055	10329266	0,255,127
chr2L	10329077	10329245	2	2	+	10329077	10329245	0,205,102
chr2L	10329078	10329559	1	1	+	10329078	10329559	0,255,127
chr2L	10329085	10329245	119	4834	+	10329085	10329245	16,78,139
chr2L	10329212	10329371	10	3057	+	10329212	10329371	16,78,139
chr2L	10329230	10329371	2	2	+	10329230	10329371	0,255,127
chr2L	10329292	10329621	1	1	+	10329292	10329621	0,205,102
chr2L	10329316	10329653	1	1	+	10329316	10329653	0,255,127
chr2L	10329360	10329524	1	1499	+	10329360	10329524	16,78,139
chr2L	10329362	10329528	1	1	+	10329362	10329528	0,255,127
chr2L	10329497	10330050	1	1	+	10329497	10330050	0,255,127
chr2L	10329879	10330039	1	1	+	10329879	10330039	0,255,127
chr2L	10329881	10330041	10	3678	+	10329881	10330041	16,78,139
chr2L	10330187	10330332	1	1	+	10330187	10330332	0,255,127
chr2L	10330293	10330454	1	1	+	10330293	10330454	0,205,102
chr2L	10330538	10331016	1	1	+	10330538	10331016	0,255,127
chr2L	10330542	10330764	1	6	+	10330542	10330764	0,205,102
chr2L	10330542	10331016	1	3	+	10330542	10331016	0,205,102
chr2L	10330542	10331020	2	34	+	10330542	10331020	0,255,127
chr2L	10330542	10331125	1	1	+	10330542	10331125	0,205,102
chr2L	10330542	10331129	1	2015	+	10330542	10331129	16,78,139
chr2L	10330542	10331493	2	2	+	10330542	10331493	0,205,102
chr2L	10330569	10331129	1	1	+	10330569	10331129	0,205,102
chr2L	10330974	10331129	1	8	+	10330974	10331129	0,205,102
chr2L	10331631	10331796	1	642	+	10331631	10331796	16,78,139
chr2L	10331636	10331796	1	5	+	10331636	10331796	0,205,102
chr2L	10331880	10332037	1	134	+	10331880	10332037	16,78,139
chr2L	10332071	10332671	1	1	+	10332071	10332671	0,255,127
chr2L	10332284	10332807	1	1	+	10332284	10332807	0,255,127
chr2L	10332288	10332690	1	1	+	10332288	10332690	0,255,127
chr2L	10332624	10332788	1	1374	+	10332624	10332788	16,78,139
chr2L	10332923	10333064	1	1	+	10332923	10333064	0,255,127
chr2L	10333107	10334940	1	1	+	10333107	10334940	0,205,102
chr2L	10333799	10334069	1	3	+	10333799	10334069	16,78,139
chr2L	10333799	10334145	1	2	+	10333799	10334145	16,78,139
chr2L	10333870	10334145	1	1	+	10333870	10334145	0,205,102
chr2L	10333997	10334200	1	1	+	10333997	10334200	0,205,102
chr2L	10334273	10334389	1	1	+	10334273	10334389	0,255,127
chr2L	10334339	10334641	1	1	+	10334339	10334641	0,255,127
chr2L	10334363	10334641	1	1	+	10334363	10334641	0,255,127
chr2L	10334425	10334742	1	1	+	10334425	10334742	0,255,127
chr2L	103345	103629	1	1	+	103345	103629	0,255,127
chr2L	10334762	10335154	1	1	+	10334762	10335154	0,205,102
chr2L	10334762	10335830	1	1128	+	10334762	10335830	16,78,139
chr2L	10335115	10335830	1	1	+	10335115	10335830	0,205,102
chr2L	10335595	10335830	1	1	+	10335595	10335830	0,205,102
chr2L	10335874	10336071	1	611	+	10335874	10336071	16,78,139
chr2L	10336241	10336418	1	1	+	10336241	10336418	0,255,127
chr2L	10336807	10337014	1	1	+	10336807	10337014	0,255,127
chr2L	10336833	10336994	1	823	+	10336833	10336994	16,78,139
chr2L	10337022	10337190	1	816	+	10337022	10337190	16,78,139
chr2L	10337022	10337200	2	4	+	10337022	10337200	0,205,102
chr2L	10337243	10337417	1	1407	+	10337243	10337417	16,78,139
chr2L	10337514	10338324	1	1	+	10337514	10338324	0,255,127
chr2L	10337546	10338068	14	5542	+	10337546	10338068	16,78,139
chr2L	10337550	10338068	1	4	+	10337550	10338068	0,205,102
chr2L	10337556	10338068	1	2	+	10337556	10338068	0,205,102
chr2L	1033762	1034203	2	2	+	1033762	1034203	0,255,127
chr2L	10337992	10338118	1	1	+	10337992	10338118	0,255,127
chr2L	10338057	10338233	1	1	+	10338057	10338233	0,255,127
chr2L	10338066	10338281	1	9939	+	10338066	10338281	16,78,139
chr2L	10338066	10338293	1	1	+	10338066	10338293	0,205,102
chr2L	1033834	1034205	1	1	+	1033834	1034205	0,255,127
chr2L	103384	103565	100	2414	+	103384	103565	16,78,139
chr2L	103384	103927	1	218	+	103384	103927	0,205,102
chr2L	103384	108637	1	10	+	103384	108637	0,205,102
chr2L	10338461	10338666	1	1	+	10338461	10338666	0,205,102
chr2L	103388	103569	1	1	+	103388	103569	0,255,127
chr2L	1033881	1034203	1	1	+	1033881	1034203	0,255,127
chr2L	10339215	10339388	2	2	+	10339215	10339388	0,205,102
chr2L	1033955	1034163	1	1	+	1033955	1034163	0,255,127
chr2L	10339568	10340201	1	692	+	10339568	10340201	16,78,139
chr2L	1034012	1034205	2	2	+	1034012	1034205	0,255,127
chr2L	10340188	10340360	1	591	+	10340188	10340360	16,78,139
chr2L	10340425	10340582	1	1	+	10340425	10340582	0,255,127
chr2L	10340429	10340582	10	2706	+	10340429	10340582	16,78,139
chr2L	10340429	10340598	1	12	+	10340429	10340598	0,205,102
chr2L	1034063	1034185	1	1	+	1034063	1034185	0,255,127
chr2L	10340761	10340916	1	604	+	10340761	10340916	16,78,139
chr2L	10340909	10341057	1	545	+	10340909	10341057	16,78,139
chr2L	10341001	10341160	1	1	+	10341001	10341160	0,205,102
chr2L	1034103	1034223	1	1	+	1034103	1034223	0,255,127
chr2L	10341113	10341275	1	939	+	10341113	10341275	16,78,139
chr2L	1034117	1046877	1	1	+	1034117	1046877	0,255,127
chr2L	1034123	1043080	1	1	+	1034123	1043080	0,255,127
chr2L	10341305	10341577	1	1	+	10341305	10341577	0,255,127
chr2L	10341366	10341577	1	2	+	10341366	10341577	0,255,127
chr2L	10341366	10341581	1	5	+	10341366	10341581	0,205,102
chr2L	1034140	1034451	1	13	+	1034140	1034451	0,205,102
chr2L	1034140	1043013	11	1945	+	1034140	1043013	16,78,139
chr2L	1034140	1045679	1	1	+	1034140	1045679	0,205,102
chr2L	1034140	1046689	1	1	+	1034140	1046689	0,255,127
chr2L	1034140	1046859	1	137894	+	1034140	1046859	16,78,139
chr2L	1034143	1046859	1	1	+	1034143	1046859	0,255,127
chr2L	10341715	10341871	10	3093	+	10341715	10341871	16,78,139
chr2L	10341715	10341880	1	7	+	10341715	10341880	0,205,102
chr2L	10341882	10342196	1	1	+	10341882	10342196	0,255,127
chr2L	10341882	10342199	12	5870	+	10341882	10342199	16,78,139
chr2L	10341882	10342201	1	8	+	10341882	10342201	0,205,102
chr2L	10341882	10342205	1	37	+	10341882	10342205	0,205,102
chr2L	10341886	10342203	1	1	+	10341886	10342203	0,255,127
chr2L	10342183	10342338	10	5345	+	10342183	10342338	16,78,139
chr2L	10342183	10342366	1	3	+	10342183	10342366	0,205,102
chr2L	10342276	10342453	1	1	+	10342276	10342453	0,205,102
chr2L	10342328	10342647	1	4	+	10342328	10342647	0,205,102
chr2L	10342816	10342979	1	4	+	10342816	10342979	0,205,102
chr2L	10342865	10343025	1	212	+	10342865	10343025	16,78,139
chr2L	10343164	10343329	1	3	+	10343164	10343329	0,205,102
chr2L	10343276	10343536	1	1	+	10343276	10343536	0,205,102
chr2L	10343280	10343536	1	8	+	10343280	10343536	0,205,102
chr2L	10343299	10343460	2	2	+	10343299	10343460	0,255,127
chr2L	10343302	10343536	2	4	+	10343302	10343536	0,205,102
chr2L	10343304	10343460	10	11454	+	10343304	10343460	16,78,139
chr2L	10343304	10343476	1	228	+	10343304	10343476	0,205,102
chr2L	10343462	10343621	1	1	+	10343462	10343621	0,205,102
chr2L	10343462	10343624	2	2	+	10343462	10343624	0,205,102
chr2L	10343537	10343693	1	274	+	10343537	10343693	0,205,102
chr2L	10343554	10343708	1	4088	+	10343554	10343708	16,78,139
chr2L	10343554	10343735	1	14	+	10343554	10343735	16,78,139
chr2L	10343688	10343868	1	1	+	10343688	10343868	0,205,102
chr2L	10343712	10343865	1	70	+	10343712	10343865	16,78,139
chr2L	10344693	10345520	1	79	+	10344693	10345520	16,78,139
chr2L	10345525	10345696	1	223	+	10345525	10345696	16,78,139
chr2L	10345639	10345798	1	186	+	10345639	10345798	16,78,139
chr2L	10345746	10347620	1	1	+	10345746	10347620	0,255,127
chr2L	10345872	10346036	1	66	+	10345872	10346036	16,78,139
chr2L	10346314	10347331	1	1	+	10346314	10347331	0,255,127
chr2L	10346316	10346472	1	57	+	10346316	10346472	16,78,139
chr2L	10346388	10346663	1	1	+	10346388	10346663	0,255,127
chr2L	10346461	10346607	1	1	+	10346461	10346607	0,205,102
chr2L	10346461	10346622	1	241	+	10346461	10346622	16,78,139
chr2L	10346616	10346780	1	1	+	10346616	10346780	0,255,127
chr2L	10346737	10346978	1	72	+	10346737	10346978	16,78,139
chr2L	10347269	10347620	1	1	+	10347269	10347620	0,255,127
chr2L	10347564	10348005	1	1	+	10347564	10348005	0,205,102
chr2L	10348146	10348709	1	136	+	10348146	10348709	16,78,139
chr2L	10348146	10351764	1	1	+	10348146	10351764	16,78,139
chr2L	10348923	10350769	1	162	+	10348923	10350769	16,78,139
chr2L	1035048	1043013	1	4	+	1035048	1043013	0,205,102
chr2L	1035048	1045679	1	1	+	1035048	1045679	0,205,102
chr2L	1035048	1046859	1	9	+	1035048	1046859	0,205,102
chr2L	10350727	10350950	1	2	+	10350727	10350950	0,205,102
chr2L	10350727	10350997	1	16	+	10350727	10350997	0,205,102
chr2L	10350727	10351054	1	5	+	10350727	10351054	0,205,102
chr2L	10350727	10351764	1	5	+	10350727	10351764	16,78,139
chr2L	1035174	1043013	1	1	+	1035174	1043013	0,205,102
chr2L	1035174	1045679	1	1	+	1035174	1045679	0,205,102
chr2L	1035174	1046859	1	4	+	1035174	1046859	0,205,102
chr2L	10351975	10353281	1	2	+	10351975	10353281	16,78,139
chr2L	103536	103677	2	2	+	103536	103677	0,255,127
chr2L	10354955	10355115	1	2	+	10354955	10355115	16,78,139
chr2L	10355176	10355531	1	5	+	10355176	10355531	16,78,139
chr2L	10356906	10357059	1	88	+	10356906	10357059	16,78,139
chr2L	10357282	10693836	1	1	+	10357282	10693836	0,205,102
chr2L	10357385	10357541	1	609	+	10357385	10357541	16,78,139
chr2L	10358058	10794248	1	1	+	10358058	10794248	0,205,102
chr2L	10358387	10358551	1	579	+	10358387	10358551	16,78,139
chr2L	10358598	10358756	1	1	+	10358598	10358756	0,205,102
chr2L	10358598	10358760	10	1095	+	10358598	10358760	16,78,139
chr2L	10358910	10359118	1	1	+	10358910	10359118	0,205,102
chr2L	10359165	10359368	1	1	+	10359165	10359368	0,255,127
chr2L	10359389	10361183	1	1	+	10359389	10361183	0,255,127
chr2L	10359419	10361087	1	1	+	10359419	10361087	0,255,127
chr2L	10359888	10360052	1	55	+	10359888	10360052	16,78,139
chr2L	10361218	10403368	1	1	+	10361218	10403368	0,205,102
chr2L	10361311	10361471	1	100	+	10361311	10361471	16,78,139
chr2L	10361534	10361715	1	113	+	10361534	10361715	16,78,139
chr2L	10361563	10361715	1	1	+	10361563	10361715	0,205,102
chr2L	10361905	10362063	1	585	+	10361905	10362063	16,78,139
chr2L	10362347	10362512	1	27	+	10362347	10362512	16,78,139
chr2L	10362494	10362665	1	2	+	10362494	10362665	0,205,102
chr2L	10363475	10363638	1	11	+	10363475	10363638	16,78,139
chr2L	10364482	10364783	1	1	+	10364482	10364783	0,205,102
chr2L	10364547	10365081	1	7	+	10364547	10365081	16,78,139
chr2L	10365140	10365314	1	10	+	10365140	10365314	16,78,139
chr2L	10365169	10403244	1	1	+	10365169	10403244	0,255,127
chr2L	10365378	10365539	1	33	+	10365378	10365539	16,78,139
chr2L	10365630	10365820	1	86	+	10365630	10365820	16,78,139
chr2L	10366925	10367110	1	1	+	10366925	10367110	0,255,127
chr2L	10367467	10367768	1	1	+	10367467	10367768	0,255,127
chr2L	10368117	10368271	1	1	+	10368117	10368271	0,255,127
chr2L	10368122	10765413	1	1	+	10368122	10765413	0,255,127
chr2L	10368404	10368650	10	1378	+	10368404	10368650	16,78,139
chr2L	10368404	10368997	1	2	+	10368404	10368997	0,205,102
chr2L	10368835	10368997	10	3339	+	10368835	10368997	16,78,139
chr2L	10368935	10370810	1	1	+	10368935	10370810	0,255,127
chr2L	10369145	10369468	1	1	+	10369145	10369468	0,255,127
chr2L	10369155	10369324	1	306	+	10369155	10369324	16,78,139
chr2L	10369479	10369640	1	419	+	10369479	10369640	16,78,139
chr2L	10369882	10370077	1	63	+	10369882	10370077	16,78,139
chr2L	10372873	10373718	1	14	+	10372873	10373718	0,205,102
chr2L	10372873	10373731	1	717	+	10372873	10373731	0,205,102
chr2L	10372896	10373731	1	1	+	10372896	10373731	0,205,102
chr2L	10373750	10374005	1	1	+	10373750	10374005	0,255,127
chr2L	10375041	10375197	1	124	+	10375041	10375197	16,78,139
chr2L	10376390	10376815	1	6	+	10376390	10376815	0,205,102
chr2L	10376390	10377297	1	3	+	10376390	10377297	0,205,102
chr2L	10376503	10376815	1	97	+	10376503	10376815	16,78,139
chr2L	10376503	10376861	1	3	+	10376503	10376861	0,205,102
chr2L	10376503	10377287	1	1	+	10376503	10377287	0,205,102
chr2L	10376503	10377297	1	64	+	10376503	10377297	16,78,139
chr2L	10376626	10376815	2	2	+	10376626	10376815	0,205,102
chr2L	10376834	10377287	1	34	+	10376834	10377287	16,78,139
chr2L	10376834	10377297	1	2253	+	10376834	10377297	16,78,139
chr2L	10376834	10377846	1	1	+	10376834	10377846	0,205,102
chr2L	10376860	10377287	1	1	+	10376860	10377287	0,205,102
chr2L	10376860	10377297	1	10	+	10376860	10377297	16,78,139
chr2L	10376910	10377297	1	1	+	10376910	10377297	0,205,102
chr2L	10377063	10377297	1	1	+	10377063	10377297	0,205,102
chr2L	10377101	10377297	1	1	+	10377101	10377297	0,205,102
chr2L	10377332	10377841	1	3	+	10377332	10377841	0,255,127
chr2L	10377333	10377841	1	2	+	10377333	10377841	0,255,127
chr2L	10377338	10377846	10	2861	+	10377338	10377846	16,78,139
chr2L	10377348	10377846	1	1	+	10377348	10377846	0,205,102
chr2L	10377782	10377941	1	2	+	10377782	10377941	0,205,102
chr2L	10377892	10378060	105	3463	+	10377892	10378060	16,78,139
chr2L	10378014	10378162	1	1	+	10378014	10378162	0,255,127
chr2L	10378167	10378337	1	2	+	10378167	10378337	0,205,102
chr2L	10378171	10378337	1	1023	+	10378171	10378337	16,78,139
chr2L	10378349	10378540	1	1024	+	10378349	10378540	16,78,139
chr2L	10378456	10378875	1	1	+	10378456	10378875	0,255,127
chr2L	10378478	10379181	1	1	+	10378478	10379181	0,255,127
chr2L	10378645	10378875	1	1	+	10378645	10378875	0,255,127
chr2L	10378814	10378972	10	1148	+	10378814	10378972	16,78,139
chr2L	10378927	10593211	1	1	+	10378927	10593211	0,255,127
chr2L	10379415	10379594	1	1	+	10379415	10379594	0,255,127
chr2L	10379575	10693007	1	1	+	10379575	10693007	0,255,127
chr2L	10379646	10380220	1	1	+	10379646	10380220	0,255,127
chr2L	10380128	10380564	1	1	+	10380128	10380564	0,255,127
chr2L	10380763	10380962	1	77	+	10380763	10380962	16,78,139
chr2L	10381060	10381212	1	464	+	10381060	10381212	16,78,139
chr2L	10381272	10381426	1	166	+	10381272	10381426	16,78,139
chr2L	10382397	10383056	1	2	+	10382397	10383056	16,78,139
chr2L	10383496	10383663	1	22	+	10383496	10383663	16,78,139
chr2L	10383751	10383916	1	23	+	10383751	10383916	16,78,139
chr2L	10383911	10384074	1	28	+	10383911	10384074	16,78,139
chr2L	10384087	10384245	1	36	+	10384087	10384245	16,78,139
chr2L	103850	235323	1	1	+	103850	235323	0,255,127
chr2L	10385032	10385189	1	29	+	10385032	10385189	16,78,139
chr2L	10385593	10386078	1	17	+	10385593	10386078	16,78,139
chr2L	10386737	10386911	1	323	+	10386737	10386911	16,78,139
chr2L	10387284	10387448	1	1	+	10387284	10387448	0,205,102
chr2L	10388477	10390098	1	64	+	10388477	10390098	16,78,139
chr2L	10390077	10392325	1	1	+	10390077	10392325	0,255,127
chr2L	10390079	10392113	2	2	+	10390079	10392113	0,255,127
chr2L	10390665	10392113	1	1	+	10390665	10392113	0,255,127
chr2L	10391422	10392110	1	1	+	10391422	10392110	0,255,127
chr2L	10391452	10392091	1	1	+	10391452	10392091	0,255,127
chr2L	10391492	10394796	1	1	+	10391492	10394796	0,205,102
chr2L	10391564	10392074	1	1	+	10391564	10392074	0,255,127
chr2L	10391923	10392085	1	1	+	10391923	10392085	0,255,127
chr2L	10392307	10392431	1	1	+	10392307	10392431	0,255,127
chr2L	10392330	10693338	1	1	+	10392330	10693338	0,255,127
chr2L	10392351	10392468	1	1	+	10392351	10392468	0,205,102
chr2L	103933	108637	1	3	+	103933	108637	0,205,102
chr2L	10394072	10394269	1	2	+	10394072	10394269	0,255,127
chr2L	10394237	10394400	1	1	+	10394237	10394400	0,205,102
chr2L	10394306	10394640	2	2	+	10394306	10394640	0,255,127
chr2L	10394394	10394638	1	1	+	10394394	10394638	0,255,127
chr2L	10394531	10394676	1	1	+	10394531	10394676	0,255,127
chr2L	10394894	10395360	1	1	+	10394894	10395360	0,205,102
chr2L	10394894	10396264	1	92	+	10394894	10396264	16,78,139
chr2L	10395481	10395608	1	1	+	10395481	10395608	0,255,127
chr2L	10395887	10396264	1	2	+	10395887	10396264	0,205,102
chr2L	10395928	10396117	1	1	+	10395928	10396117	0,205,102
chr2L	10396799	10397092	1	5	+	10396799	10397092	0,205,102
chr2L	10396799	10397140	1	1	+	10396799	10397140	0,205,102
chr2L	10396799	10398084	1	2	+	10396799	10398084	16,78,139
chr2L	10396871	10397092	1	14	+	10396871	10397092	0,205,102
chr2L	10396871	10397437	1	1	+	10396871	10397437	0,205,102
chr2L	10396871	10398084	1	72	+	10396871	10398084	16,78,139
chr2L	10396918	10398084	1	1	+	10396918	10398084	0,205,102
chr2L	10396932	10397092	1	9	+	10396932	10397092	0,205,102
chr2L	10396932	10397437	1	3	+	10396932	10397437	0,205,102
chr2L	10396932	10398084	1	1381	+	10396932	10398084	16,78,139
chr2L	10397088	10397437	1	1	+	10397088	10397437	0,205,102
chr2L	10397088	10398084	1	3	+	10397088	10398084	0,205,102
chr2L	10397112	10398084	1	3	+	10397112	10398084	0,205,102
chr2L	10397144	10398084	1	16	+	10397144	10398084	0,205,102
chr2L	10397230	10398084	1	11	+	10397230	10398084	0,205,102
chr2L	10397424	10398084	1	4	+	10397424	10398084	16,78,139
chr2L	10397456	10397576	1	1	+	10397456	10397576	0,255,127
chr2L	10397597	10398084	1	2	+	10397597	10398084	0,205,102
chr2L	10397844	10398084	1	1	+	10397844	10398084	0,205,102
chr2L	10398141	10398256	1	1	+	10398141	10398256	0,205,102
chr2L	10398169	10398328	1	20446	+	10398169	10398328	16,78,139
chr2L	10398317	10398501	1	1	+	10398317	10398501	0,255,127
chr2L	10398342	10398493	1	16180	+	10398342	10398493	16,78,139
chr2L	10398342	10398508	1	3	+	10398342	10398508	0,205,102
chr2L	10398344	10398495	1	16	+	10398344	10398495	0,255,127
chr2L	10398460	10400031	1	1	+	10398460	10400031	0,255,127
chr2L	10398543	10398703	1	1017	+	10398543	10398703	16,78,139
chr2L	10398543	10398712	1	2	+	10398543	10398712	0,205,102
chr2L	10398547	10398707	1	1	+	10398547	10398707	0,255,127
chr2L	10398690	10398868	1	1	+	10398690	10398868	0,205,102
chr2L	10398690	10399366	1	1089	+	10398690	10399366	16,78,139
chr2L	10398699	10399366	1	136	+	10398699	10399366	16,78,139
chr2L	10399331	10402805	1	1	+	10399331	10402805	0,255,127
chr2L	10399332	10402763	1	1	+	10399332	10402763	0,205,102
chr2L	10399401	10402478	1	1	+	10399401	10402478	0,255,127
chr2L	10399485	10399644	1	1924	+	10399485	10399644	16,78,139
chr2L	10399485	10399656	2	2	+	10399485	10399656	0,205,102
chr2L	10399490	10399649	1	3	+	10399490	10399649	0,255,127
chr2L	10399626	10399817	1	376	+	10399626	10399817	16,78,139
chr2L	10399626	10399889	2	2	+	10399626	10399889	0,205,102
chr2L	10399631	10399755	1	1	+	10399631	10399755	0,255,127
chr2L	10399638	10399807	1	1	+	10399638	10399807	0,255,127
chr2L	10399638	10399817	1	797	+	10399638	10399817	16,78,139
chr2L	10399659	10399814	1	2	+	10399659	10399814	0,255,127
chr2L	10399662	10399817	102	2328	+	10399662	10399817	16,78,139
chr2L	10399662	10399841	1	6	+	10399662	10399841	0,205,102
chr2L	10399780	10399919	1	2	+	10399780	10399919	0,255,127
chr2L	10400128	10400273	1	1	+	10400128	10400273	0,205,102
chr2L	10400133	10400325	1	1	+	10400133	10400325	0,255,127
chr2L	10400134	10400273	1	1	+	10400134	10400273	0,255,127
chr2L	10400182	10402112	1	1	+	10400182	10402112	0,255,127
chr2L	10400182	10402560	1	1	+	10400182	10402560	0,255,127
chr2L	10400410	10400537	1	1	+	10400410	10400537	0,255,127
chr2L	10400431	10401759	1	1	+	10400431	10401759	0,255,127
chr2L	10400433	10401149	1	1	+	10400433	10401149	0,255,127
chr2L	10400564	10402456	1	1	+	10400564	10402456	0,255,127
chr2L	10400629	10400784	104	13219	+	10400629	10400784	16,78,139
chr2L	10400629	10400798	1	1	+	10400629	10400798	0,205,102
chr2L	10400631	10400786	1	14	+	10400631	10400786	0,255,127
chr2L	10400819	10400985	1	16	+	10400819	10400985	0,255,127
chr2L	10400819	10401012	10	1091	+	10400819	10401012	16,78,139
chr2L	10400948	10401126	1	672	+	10400948	10401126	16,78,139
chr2L	10401221	10401383	101	1979	+	10401221	10401383	16,78,139
chr2L	10401221	10401393	1	1	+	10401221	10401393	0,205,102
chr2L	10401484	10402083	1	3	+	10401484	10402083	0,255,127
chr2L	10401544	10401711	10	1374	+	10401544	10401711	16,78,139
chr2L	10401691	10401853	10	2014	+	10401691	10401853	16,78,139
chr2L	1040174	1040321	1	1	+	1040174	1040321	0,255,127
chr2L	10401817	10401975	10	2376	+	10401817	10401975	16,78,139
chr2L	10401980	10402146	2	2	+	10401980	10402146	0,255,127
chr2L	10402107	10402277	1	4	+	10402107	10402277	0,255,127
chr2L	10402117	10402232	1	1	+	10402117	10402232	0,255,127
chr2L	10402122	10402277	1	1	+	10402122	10402277	0,205,102
chr2L	10402283	10402456	1	1942	+	10402283	10402456	16,78,139
chr2L	10402509	10402680	1	1	+	10402509	10402680	0,205,102
chr2L	10402512	10402680	1	3178	+	10402512	10402680	16,78,139
chr2L	10402655	10693476	1	1	+	10402655	10693476	0,255,127
chr2L	10402663	10402781	1	1	+	10402663	10402781	0,205,102
chr2L	10402687	10402852	1	1	+	10402687	10402852	0,205,102
chr2L	10402800	10403196	1	1	+	10402800	10403196	0,255,127
chr2L	10402806	10603210	1	1	+	10402806	10603210	0,255,127
chr2L	10403104	10403271	1	34	+	10403104	10403271	0,205,102
chr2L	10403108	10403268	1	1	+	10403108	10403268	0,255,127
chr2L	10403121	10403271	1	1	+	10403121	10403271	0,205,102
chr2L	10403149	10537043	1	1	+	10403149	10537043	0,255,127
chr2L	10403506	10403779	1	704	+	10403506	10403779	16,78,139
chr2L	10403778	10403940	1	292	+	10403778	10403940	16,78,139
chr2L	10403857	10404660	2	4	+	10403857	10404660	0,205,102
chr2L	10403882	10404042	1	179	+	10403882	10404042	16,78,139
chr2L	10404003	10404503	1	1	+	10404003	10404503	0,205,102
chr2L	10404003	10404660	1	5	+	10404003	10404660	0,205,102
chr2L	10404500	10404660	1	1255	+	10404500	10404660	16,78,139
chr2L	10404696	10404878	1	1	+	10404696	10404878	0,205,102
chr2L	10404704	10404878	1	1145	+	10404704	10404878	16,78,139
chr2L	10404754	10404907	1	4	+	10404754	10404907	0,205,102
chr2L	10404838	10405195	1	3	+	10404838	10405195	0,205,102
chr2L	10404838	10406594	1	1	+	10404838	10406594	0,205,102
chr2L	10406387	10406548	1	1	+	10406387	10406548	16,78,139
chr2L	1040693	1043013	1	1	+	1040693	1043013	0,205,102
chr2L	1040693	1046859	1	1	+	1040693	1046859	0,205,102
chr2L	10407252	10407413	1	2	+	10407252	10407413	16,78,139
chr2L	10407600	10407895	1	10	+	10407600	10407895	16,78,139
chr2L	10408336	10408510	1	1	+	10408336	10408510	0,205,102
chr2L	10408336	10408788	1	63	+	10408336	10408788	16,78,139
chr2L	10408336	10409760	10	1950	+	10408336	10409760	16,78,139
chr2L	10408571	10408788	1	21	+	10408571	10408788	0,205,102
chr2L	10408953	10409152	1	2	+	10408953	10409152	0,205,102
chr2L	10409056	10409760	1	12	+	10409056	10409760	0,255,127
chr2L	10409182	10409760	1	1	+	10409182	10409760	0,205,102
chr2L	10409266	10409853	1	1	+	10409266	10409853	0,255,127
chr2L	10409400	10693070	1	1	+	10409400	10693070	0,255,127
chr2L	10409627	10410109	1	1	+	10409627	10410109	0,255,127
chr2L	10409686	10409873	1	2	+	10409686	10409873	0,255,127
chr2L	10409718	10693323	1	4	+	10409718	10693323	0,255,127
chr2L	10409767	10410014	1	1	+	10409767	10410014	0,255,127
chr2L	10409834	10410026	2	2	+	10409834	10410026	0,255,127
chr2L	10409877	10410040	1	1	+	10409877	10410040	0,255,127
chr2L	10410001	10410290	100	11897	+	10410001	10410290	16,78,139
chr2L	10410001	10410308	1	1	+	10410001	10410308	0,205,102
chr2L	10410118	10410290	1	1	+	10410118	10410290	0,205,102
chr2L	10410203	10410382	1	1	+	10410203	10410382	0,255,127
chr2L	10410228	10410397	1	1	+	10410228	10410397	0,255,127
chr2L	10410402	10537041	1	1	+	10410402	10537041	0,255,127
chr2L	10410402	10603213	1	1	+	10410402	10603213	0,255,127
chr2L	10410402	10750465	1	1	+	10410402	10750465	0,255,127
chr2L	10410407	10537040	1	1	+	10410407	10537040	0,255,127
chr2L	10410417	10750462	1	1	+	10410417	10750462	0,255,127
chr2L	10410907	10412847	1	1	+	10410907	10412847	0,255,127
chr2L	10410958	10411140	1	5	+	10410958	10411140	16,78,139
chr2L	10410986	10411140	10	1737	+	10410986	10411140	16,78,139
chr2L	10410986	10411145	1	1	+	10410986	10411145	0,205,102
chr2L	10411307	10411585	1	1	+	10411307	10411585	0,255,127
chr2L	10411313	10411480	10	566	+	10411313	10411480	16,78,139
chr2L	10411607	10411930	1	5	+	10411607	10411930	0,205,102
chr2L	10411772	10411930	1	826	+	10411772	10411930	16,78,139
chr2L	10411911	10412072	1	293	+	10411911	10412072	16,78,139
chr2L	10412092	10412254	1	1004	+	10412092	10412254	16,78,139
chr2L	10412314	10412474	1	1570	+	10412314	10412474	16,78,139
chr2L	10412517	10412673	1	504	+	10412517	10412673	16,78,139
chr2L	10412517	10412675	1	1	+	10412517	10412675	0,205,102
chr2L	10413162	10413374	1	1	+	10413162	10413374	0,205,102
chr2L	10413169	10413374	1	597	+	10413169	10413374	16,78,139
chr2L	10414071	10414643	1	2	+	10414071	10414643	16,78,139
chr2L	10414091	10414643	1	37	+	10414091	10414643	16,78,139
chr2L	10414607	10414830	1	56	+	10414607	10414830	16,78,139
chr2L	10414869	10415033	1	58	+	10414869	10415033	16,78,139
chr2L	10415358	10415519	1	43	+	10415358	10415519	16,78,139
chr2L	10415990	10416153	1	41	+	10415990	10416153	16,78,139
chr2L	10416396	10416554	1	151	+	10416396	10416554	16,78,139
chr2L	10416586	10416740	1	926	+	10416586	10416740	16,78,139
chr2L	10416586	10416743	1	118	+	10416586	10416743	0,205,102
chr2L	10416778	10417089	1	1	+	10416778	10417089	0,255,127
chr2L	10416832	10416995	1	3387	+	10416832	10416995	16,78,139
chr2L	10416832	10417021	8	8	+	10416832	10417021	0,205,102
chr2L	10416922	10417332	1	1	+	10416922	10417332	0,255,127
chr2L	10417098	10417260	1	619	+	10417098	10417260	16,78,139
chr2L	10418057	10418342	1	1	+	10418057	10418342	0,255,127
chr2L	10418143	10418306	1	260	+	10418143	10418306	16,78,139
chr2L	10418288	10418454	1	206	+	10418288	10418454	16,78,139
chr2L	10418937	10537042	1	1	+	10418937	10537042	0,255,127
chr2L	10419252	10419408	1	5	+	10419252	10419408	16,78,139
chr2L	10419373	10419529	1	6	+	10419373	10419529	16,78,139
chr2L	10419880	10420040	1	39	+	10419880	10420040	16,78,139
chr2L	10420155	10420315	1	1	+	10420155	10420315	0,255,127
chr2L	10420155	10420317	1	406	+	10420155	10420317	16,78,139
chr2L	10420295	10420450	1	214	+	10420295	10420450	16,78,139
chr2L	1042042	1042577	1	1	+	1042042	1042577	0,255,127
chr2L	10420525	10420688	1	2	+	10420525	10420688	0,205,102
chr2L	10420651	10691253	1	1	+	10420651	10691253	0,255,127
chr2L	10420657	10847459	1	1	+	10420657	10847459	0,255,127
chr2L	104208	104336	1	1	+	104208	104336	0,255,127
chr2L	10421209	10421368	1	11	+	10421209	10421368	16,78,139
chr2L	10421250	10421422	1	1	+	10421250	10421422	0,255,127
chr2L	10421263	10421399	1	1	+	10421263	10421399	0,255,127
chr2L	10421286	10421422	1	18	+	10421286	10421422	0,255,127
chr2L	10422412	10422579	1	3	+	10422412	10422579	16,78,139
chr2L	10423296	10423478	1	1	+	10423296	10423478	16,78,139
chr2L	10423630	10423800	1	67	+	10423630	10423800	16,78,139
chr2L	10424048	10424420	1	256	+	10424048	10424420	16,78,139
chr2L	10424433	10424593	10	821	+	10424433	10424593	16,78,139
chr2L	10424620	10424755	1	1	+	10424620	10424755	0,205,102
chr2L	10424620	10424783	10	1278	+	10424620	10424783	16,78,139
chr2L	10424719	10424915	1	1	+	10424719	10424915	0,255,127
chr2L	10424720	10424909	1	1	+	10424720	10424909	0,255,127
chr2L	10424761	10425294	1	1	+	10424761	10425294	0,255,127
chr2L	10424875	10425041	1	1	+	10424875	10425041	0,255,127
chr2L	10424880	10425041	1	1023	+	10424880	10425041	16,78,139
chr2L	10425116	10425277	1	1	+	10425116	10425277	0,255,127
chr2L	10425270	10425406	1	1	+	10425270	10425406	0,255,127
chr2L	10425317	10594885	1	1	+	10425317	10594885	0,255,127
chr2L	10425452	10750466	1	1	+	10425452	10750466	0,255,127
chr2L	104257	348389	1	1	+	104257	348389	0,255,127
chr2L	10426074	10426543	1	24	+	10426074	10426543	16,78,139
chr2L	10426953	10427102	1	1	+	10426953	10427102	16,78,139
chr2L	10426953	10427125	1	187	+	10426953	10427125	16,78,139
chr2L	10426958	10427125	1	11	+	10426958	10427125	16,78,139
chr2L	10427202	10427521	1	1	+	10427202	10427521	0,255,127
chr2L	10427324	10427607	1	1	+	10427324	10427607	0,255,127
chr2L	10427476	10427884	1	1	+	10427476	10427884	0,255,127
chr2L	10427482	10427891	1	1	+	10427482	10427891	0,255,127
chr2L	10427867	10428045	1	1	+	10427867	10428045	0,255,127
chr2L	10427958	10838036	1	1	+	10427958	10838036	0,255,127
chr2L	10428021	10693236	2	2	+	10428021	10693236	0,255,127
chr2L	10428315	10847515	1	1	+	10428315	10847515	0,255,127
chr2L	10428326	10879256	1	1	+	10428326	10879256	0,255,127
chr2L	10428331	10847530	1	1	+	10428331	10847530	0,255,127
chr2L	10428575	10747288	1	1	+	10428575	10747288	0,255,127
chr2L	10428575	10854608	1	1	+	10428575	10854608	0,255,127
chr2L	10428880	10429035	1	20	+	10428880	10429035	16,78,139
chr2L	10429609	10429764	1	217	+	10429609	10429764	16,78,139
chr2L	10429939	10684520	1	1	+	10429939	10684520	0,255,127
chr2L	10430171	10430349	1	1	+	10430171	10430349	0,255,127
chr2L	10430196	10430578	1	1	+	10430196	10430578	0,255,127
chr2L	10430332	10430488	1	321	+	10430332	10430488	16,78,139
chr2L	10431369	10431526	1	176	+	10431369	10431526	16,78,139
chr2L	10431838	10431993	1	395	+	10431838	10431993	16,78,139
chr2L	10431981	10432319	1	1	+	10431981	10432319	0,255,127
chr2L	10431988	10432326	1	1	+	10431988	10432326	0,255,127
chr2L	10432128	10432291	10	936	+	10432128	10432291	16,78,139
chr2L	10432202	10432326	1	1	+	10432202	10432326	0,255,127
chr2L	10433140	10433351	1	1	+	10433140	10433351	0,255,127
chr2L	10433143	10435163	1	3	+	10433143	10435163	0,255,127
chr2L	10433146	10433296	1	1	+	10433146	10433296	0,255,127
chr2L	10433260	10433387	1	1	+	10433260	10433387	0,255,127
chr2L	10433728	10433879	1	1	+	10433728	10433879	0,205,102
chr2L	10433728	10433902	1	720	+	10433728	10433902	16,78,139
chr2L	10433969	10434130	1	1	+	10433969	10434130	0,255,127
chr2L	10434372	10434548	1	1	+	10434372	10434548	0,255,127
chr2L	10434672	10434848	1	1	+	10434672	10434848	0,255,127
chr2L	10434777	10435127	1	1	+	10434777	10435127	0,205,102
chr2L	10435203	10435651	1	2	+	10435203	10435651	0,205,102
chr2L	10435203	10435996	2	2	+	10435203	10435996	0,205,102
chr2L	10435314	10435651	1	1	+	10435314	10435651	0,205,102
chr2L	10435690	10446261	1	1	+	10435690	10446261	0,205,102
chr2L	10435703	10435996	1	1	+	10435703	10435996	0,205,102
chr2L	10436139	10436298	1	228	+	10436139	10436298	16,78,139
chr2L	10436360	10436894	1	1	+	10436360	10436894	0,255,127
chr2L	10436391	10436539	1	1	+	10436391	10436539	0,205,102
chr2L	10436391	10436556	11	1489	+	10436391	10436556	16,78,139
chr2L	10436600	10436892	1	1	+	10436600	10436892	0,205,102
chr2L	10436625	10437789	1	1	+	10436625	10437789	0,205,102
chr2L	10437505	10437677	1	1	+	10437505	10437677	0,205,102
chr2L	10437619	10437789	1	2	+	10437619	10437789	0,205,102
chr2L	10437766	10437896	1	1	+	10437766	10437896	0,255,127
chr2L	10437911	10438063	1	6	+	10437911	10438063	0,255,127
chr2L	10437911	10438090	10	5129	+	10437911	10438090	16,78,139
chr2L	10437911	10438096	1	1	+	10437911	10438096	0,205,102
chr2L	10437915	10438090	1	11	+	10437915	10438090	0,205,102
chr2L	10438189	10438350	10	1151	+	10438189	10438350	16,78,139
chr2L	10438190	10438351	1	1	+	10438190	10438351	0,255,127
chr2L	10438392	10438640	10	3493	+	10438392	10438640	16,78,139
chr2L	10438646	10438805	10	5172	+	10438646	10438805	16,78,139
chr2L	10438646	10438820	1	1	+	10438646	10438820	0,205,102
chr2L	10438762	10438931	102	4863	+	10438762	10438931	16,78,139
chr2L	10438889	10439415	2	2	+	10438889	10439415	0,205,102
chr2L	10438951	10439129	2	2	+	10438951	10439129	0,255,127
chr2L	10439569	10439720	1	90	+	10439569	10439720	16,78,139
chr2L	10439838	10439994	1	160	+	10439838	10439994	16,78,139
chr2L	10440062	10440225	1	276	+	10440062	10440225	16,78,139
chr2L	10440455	10440610	1	648	+	10440455	10440610	16,78,139
chr2L	10440455	10440622	1	1	+	10440455	10440622	0,205,102
chr2L	10440561	10444801	1	5	+	10440561	10444801	0,205,102
chr2L	10444561	10745358	1	1	+	10444561	10745358	0,255,127
chr2L	10444735	10445210	1	17	+	10444735	10445210	16,78,139
chr2L	10445186	10445558	1	39	+	10445186	10445558	16,78,139
chr2L	10445982	10446234	1	10	+	10445982	10446234	16,78,139
chr2L	10446316	10446572	1	9	+	10446316	10446572	16,78,139
chr2L	10446630	10447830	1	22	+	10446630	10447830	16,78,139
chr2L	10447932	10448098	1	6	+	10447932	10448098	16,78,139
chr2L	10448180	10448341	1	22	+	10448180	10448341	16,78,139
chr2L	10449249	10449414	1	60	+	10449249	10449414	16,78,139
chr2L	10449465	10449628	1	78	+	10449465	10449628	16,78,139
chr2L	10449465	10449631	1	3	+	10449465	10449631	16,78,139
chr2L	10449473	10449626	1	1	+	10449473	10449626	0,205,102
chr2L	10450199	10450355	1	4	+	10450199	10450355	16,78,139
chr2L	10450370	10450540	1	6	+	10450370	10450540	16,78,139
chr2L	10450547	10450726	1	4	+	10450547	10450726	16,78,139
chr2L	10450689	10450840	1	1	+	10450689	10450840	0,205,102
chr2L	10450689	10450844	1	13	+	10450689	10450844	16,78,139
chr2L	10450899	10451061	1	18	+	10450899	10451061	16,78,139
chr2L	10451080	10451244	1	12	+	10451080	10451244	16,78,139
chr2L	10451802	10451956	1	1	+	10451802	10451956	16,78,139
chr2L	10451962	10452120	1	2	+	10451962	10452120	16,78,139
chr2L	10452735	10453508	1	1	+	10452735	10453508	0,255,127
chr2L	10452784	10453664	1	1	+	10452784	10453664	0,255,127
chr2L	10453865	10454025	1	17	+	10453865	10454025	16,78,139
chr2L	10454143	10454300	1	29	+	10454143	10454300	16,78,139
chr2L	10454811	10455003	1	1795	+	10454811	10455003	16,78,139
chr2L	10454818	10455010	2	2	+	10454818	10455010	0,255,127
chr2L	10455374	10455525	1	16	+	10455374	10455525	16,78,139
chr2L	10455796	10455960	1	21	+	10455796	10455960	16,78,139
chr2L	10456148	10457241	1	9	+	10456148	10457241	0,205,102
chr2L	10457912	10458497	1	1242	+	10457912	10458497	16,78,139
chr2L	1045859	1046859	1	1	+	1045859	1046859	0,205,102
chr2L	10458618	10458792	1	1	+	10458618	10458792	0,255,127
chr2L	10458768	10458929	101	2086	+	10458768	10458929	16,78,139
chr2L	10458768	10459077	1	1	+	10458768	10459077	0,205,102
chr2L	10458889	10461612	1	1	+	10458889	10461612	0,255,127
chr2L	10458982	10459217	1	1	+	10458982	10459217	0,255,127
chr2L	10458989	10459107	1	1	+	10458989	10459107	0,255,127
chr2L	10459030	10459188	1	4	+	10459030	10459188	0,255,127
chr2L	10459035	10459193	1	23296	+	10459035	10459193	16,78,139
chr2L	10459035	10459196	1	1	+	10459035	10459196	0,205,102
chr2L	10459035	10459202	1	1	+	10459035	10459202	0,205,102
chr2L	10459180	10459475	1	3	+	10459180	10459475	0,255,127
chr2L	10459230	10459386	1	1	+	10459230	10459386	0,205,102
chr2L	10459230	10459433	1	3490	+	10459230	10459433	16,78,139
chr2L	10459230	10459597	1	18	+	10459230	10459597	0,205,102
chr2L	10459230	10459711	1	2744	+	10459230	10459711	16,78,139
chr2L	10459467	10459670	1	3	+	10459467	10459670	0,205,102
chr2L	10459467	10459929	1	869	+	10459467	10459929	16,78,139
chr2L	10459745	10459929	1	1525	+	10459745	10459929	16,78,139
chr2L	10460111	10460313	1	1	+	10460111	10460313	0,255,127
chr2L	10460178	10461713	1	1	+	10460178	10461713	0,205,102
chr2L	10460354	10460521	1	1	+	10460354	10460521	0,255,127
chr2L	10460470	10460630	1	769	+	10460470	10460630	16,78,139
chr2L	10460751	10460918	1	341	+	10460751	10460918	16,78,139
chr2L	10461230	10461392	12	733	+	10461230	10461392	16,78,139
chr2L	10461596	10462345	1	1	+	10461596	10462345	0,255,127
chr2L	10461704	10461918	1	1	+	10461704	10461918	0,255,127
chr2L	10461713	10881280	1	1	+	10461713	10881280	0,255,127
chr2L	10461735	10461893	1	987	+	10461735	10461893	16,78,139
chr2L	10461735	10461898	1	1	+	10461735	10461898	0,205,102
chr2L	10463835	10463987	1	317	+	10463835	10463987	16,78,139
chr2L	10464132	10464368	1	1	+	10464132	10464368	0,255,127
chr2L	10464204	10464366	1	469	+	10464204	10464366	16,78,139
chr2L	10464494	10464671	1	83	+	10464494	10464671	16,78,139
chr2L	10464762	10464923	1	174	+	10464762	10464923	16,78,139
chr2L	10465044	10465338	1	41	+	10465044	10465338	16,78,139
chr2L	10465044	10465985	3	3	+	10465044	10465985	0,205,102
chr2L	10465044	10466407	1	1	+	10465044	10466407	0,205,102
chr2L	10465326	10465985	1	18	+	10465326	10465985	16,78,139
chr2L	10465778	10465985	1	1	+	10465778	10465985	0,205,102
chr2L	10466108	10466264	1	220	+	10466108	10466264	16,78,139
chr2L	10466252	10466407	1	79	+	10466252	10466407	16,78,139
chr2L	10466400	10468390	1	3	+	10466400	10468390	0,205,102
chr2L	10466400	10471525	1	41	+	10466400	10471525	16,78,139
chr2L	1046657	1046953	1	1	+	1046657	1046953	0,255,127
chr2L	1046681	1046859	1	10	+	1046681	1046859	0,205,102
chr2L	1046770	1047001	1	1	+	1046770	1047001	0,255,127
chr2L	10468183	10468303	1	7	+	10468183	10468303	0,255,127
chr2L	1046834	1046958	1	1	+	1046834	1046958	0,255,127
chr2L	1046843	1047334	1	1	+	1046843	1047334	0,255,127
chr2L	1046875	1047313	1	2	+	1046875	1047313	0,255,127
chr2L	1046884	1048028	1	2	+	1046884	1048028	0,255,127
chr2L	1046886	1047087	1	1	+	1046886	1047087	0,255,127
chr2L	1046889	1050767	1	1	+	1046889	1050767	0,255,127
chr2L	1046893	1047069	1	2	+	1046893	1047069	0,255,127
chr2L	1046900	1048044	1	1	+	1046900	1048044	0,255,127
chr2L	1046907	1047069	1	1	+	1046907	1047069	0,255,127
chr2L	1046917	1047045	1	1	+	1046917	1047045	0,255,127
chr2L	1046917	1047338	1	1	+	1046917	1047338	0,255,127
chr2L	1046923	1047058	1	1	+	1046923	1047058	0,205,102
chr2L	1046928	1047064	1	1	+	1046928	1047064	0,255,127
chr2L	1046931	1047064	1	1	+	1046931	1047064	0,255,127
chr2L	1046939	1047058	1	1	+	1046939	1047058	0,255,127
chr2L	1046939	1047064	1	1	+	1046939	1047064	0,255,127
chr2L	1046948	1048005	1	1	+	1046948	1048005	0,255,127
chr2L	1046950	1048009	1	1	+	1046950	1048009	0,255,127
chr2L	1046960	1048005	1	5	+	1046960	1048005	0,205,102
chr2L	1046969	1048005	1	50	+	1046969	1048005	0,205,102
chr2L	1046972	1047563	1	6	+	1046972	1047563	0,205,102
chr2L	1046972	1047774	1	233	+	1046972	1047774	0,205,102
chr2L	1046972	1047815	1	1	+	1046972	1047815	0,205,102
chr2L	1046972	1047835	1	5	+	1046972	1047835	0,205,102
chr2L	1046972	1047907	1	78	+	1046972	1047907	0,205,102
chr2L	1046972	1047909	1	33	+	1046972	1047909	0,205,102
chr2L	1046972	1047913	1	1	+	1046972	1047913	0,255,127
chr2L	1046972	1047985	1	1	+	1046972	1047985	0,205,102
chr2L	1046972	1047995	1	524	+	1046972	1047995	0,205,102
chr2L	1046972	1048005	1	43469	+	1046972	1048005	16,78,139
chr2L	1046972	1048236	1	3	+	1046972	1048236	0,205,102
chr2L	1046972	1048832	1	1	+	1046972	1048832	0,205,102
chr2L	1046997	1048020	1	1	+	1046997	1048020	0,255,127
chr2L	1047027	1048005	3	3	+	1047027	1048005	0,255,127
chr2L	10472233	10474331	1	1	+	10472233	10474331	0,205,102
chr2L	10472369	10474187	1	1	+	10472369	10474187	0,205,102
chr2L	10472369	10474331	1	1	+	10472369	10474331	0,205,102
chr2L	10472378	10474197	1	2	+	10472378	10474197	0,255,127
chr2L	10472378	10474331	1	20	+	10472378	10474331	16,78,139
chr2L	10472412	10474331	1	1	+	10472412	10474331	16,78,139
chr2L	10472435	10474197	1	1	+	10472435	10474197	24116205
chr2L	10472435	10474331	1	54	+	10472435	10474331	16,78,139
chr2L	10472435	10474336	1	4	+	10472435	10474336	16,78,139
chr2L	10472435	10477470	3	3	+	10472435	10477470	0,205,102
chr2L	10472447	10474331	1	1	+	10472447	10474331	16,78,139
chr2L	10472751	10474197	1	1	+	10472751	10474197	0,255,127
chr2L	10472751	10474331	1	1	+	10472751	10474331	0,205,102
chr2L	10473407	10474331	1	1	+	10473407	10474331	0,205,102
chr2L	1047529	1048005	2	2	+	1047529	1048005	0,205,102
chr2L	10476195	10842399	1	1	+	10476195	10842399	0,255,127
chr2L	10476197	10842399	1	1	+	10476197	10842399	0,255,127
chr2L	1047699	1047823	1	2	+	1047699	1047823	0,255,127
chr2L	10477085	10477366	3	3	+	10477085	10477366	0,205,102
chr2L	10477133	10477366	1	4	+	10477133	10477366	24116205
chr2L	10477522	10477939	1	1	+	10477522	10477939	0,205,102
chr2L	10477542	10477991	1	1	+	10477542	10477991	0,205,102
chr2L	10477542	10481147	1	183	+	10477542	10481147	16,78,139
chr2L	1047847	1048005	1	9	+	1047847	1048005	0,205,102
chr2L	1047963	1048415	2	2	+	1047963	1048415	0,255,127
chr2L	1047983	1048106	1	1	+	1047983	1048106	0,255,127
chr2L	10480396	10480798	1	2	+	10480396	10480798	0,205,102
chr2L	10480396	10481147	1	2	+	10480396	10481147	0,205,102
chr2L	10480522	10480798	1	12	+	10480522	10480798	0,205,102
chr2L	10480522	10481147	1	2	+	10480522	10481147	0,205,102
chr2L	10480855	10481147	1	9	+	10480855	10481147	0,205,102
chr2L	10480922	10481147	1	6	+	10480922	10481147	0,205,102
chr2L	10481069	10481205	1	1	+	10481069	10481205	0,255,127
chr2L	10481234	10481397	1	82	+	10481234	10481397	16,78,139
chr2L	10481520	10481671	1	52	+	10481520	10481671	16,78,139
chr2L	10481520	10481679	1	5	+	10481520	10481679	0,205,102
chr2L	10481520	10481696	1	36	+	10481520	10481696	0,205,102
chr2L	10481659	10481812	1	110	+	10481659	10481812	16,78,139
chr2L	10481933	10482092	1	168	+	10481933	10482092	16,78,139
chr2L	10482183	10482334	1	551	+	10482183	10482334	16,78,139
chr2L	10482183	10482373	2	2	+	10482183	10482373	0,205,102
chr2L	10482522	10482686	1	1	+	10482522	10482686	0,255,127
chr2L	10482524	10482674	1	219	+	10482524	10482674	16,78,139
chr2L	10482524	10482686	1	352	+	10482524	10482686	16,78,139
chr2L	10482524	10482721	1	1	+	10482524	10482721	0,205,102
chr2L	10482736	10482894	1	287	+	10482736	10482894	16,78,139
chr2L	10483376	10483533	1	33	+	10483376	10483533	16,78,139
chr2L	10483578	10483736	1	25	+	10483578	10483736	16,78,139
chr2L	10483738	10483925	1	1	+	10483738	10483925	0,205,102
chr2L	10483922	10484083	1	252	+	10483922	10484083	24116205
chr2L	10484143	10484303	1	87	+	10484143	10484303	16,78,139
chr2L	10484650	10484849	1	3	+	10484650	10484849	0,205,102
chr2L	10484710	10484874	1	352	+	10484710	10484874	16,78,139
chr2L	10484860	10693179	1	1	+	10484860	10693179	0,205,102
chr2L	10484922	10847505	1	1	+	10484922	10847505	0,255,127
chr2L	10485097	10485389	1	1	+	10485097	10485389	0,255,127
chr2L	10485147	10485303	1	656	+	10485147	10485303	16,78,139
chr2L	10485477	10485643	1	2084	+	10485477	10485643	16,78,139
chr2L	10485697	10485927	1	1	+	10485697	10485927	0,205,102
chr2L	10485740	10485904	13	5496	+	10485740	10485904	16,78,139
chr2L	10486027	10486197	1	1	+	10486027	10486197	0,255,127
chr2L	10486031	10486201	101	1627	+	10486031	10486201	16,78,139
chr2L	10486074	10486227	2	2	+	10486074	10486227	0,205,102
chr2L	10486088	10486249	1	2	+	10486088	10486249	0,205,102
chr2L	10486287	10486447	1	218	+	10486287	10486447	16,78,139
chr2L	10486923	10487877	1	1	+	10486923	10487877	0,255,127
chr2L	10486951	10487111	1	297	+	10486951	10487111	16,78,139
chr2L	10487029	10487299	1	1	+	10487029	10487299	0,205,102
chr2L	10487142	10487293	1	112	+	10487142	10487293	24116205
chr2L	10487509	10487666	1	44	+	10487509	10487666	16,78,139
chr2L	104876	108637	2	2	+	104876	108637	0,205,102
chr2L	10488303	10488460	1	10	+	10488303	10488460	16,78,139
chr2L	10488938	10489101	1	113	+	10488938	10489101	24116205
chr2L	104897	105054	1	268	+	104897	105054	16,78,139
chr2L	10490079	10490357	1	1	+	10490079	10490357	0,255,127
chr2L	10490319	10693848	1	1	+	10490319	10693848	0,205,102
chr2L	10490332	10847349	1	1	+	10490332	10847349	0,255,127
chr2L	10492449	10492606	1	111	+	10492449	10492606	16,78,139
chr2L	10492664	10492838	1	55	+	10492664	10492838	16,78,139
chr2L	10494145	10494337	1	75	+	10494145	10494337	16,78,139
chr2L	10494317	10494477	1	28	+	10494317	10494477	16,78,139
chr2L	10494761	10494928	1	33	+	10494761	10494928	16,78,139
chr2L	10495054	10496678	1	4	+	10495054	10496678	16,78,139
chr2L	10496798	10497902	1	22	+	10496798	10497902	16,78,139
chr2L	10498105	10500418	1	1	+	10498105	10500418	0,205,102
chr2L	10498105	10505975	1	80	+	10498105	10505975	16,78,139
chr2L	1050154	1050322	2	2	+	1050154	1050322	0,255,127
chr2L	1050200	1050570	1	1	+	1050200	1050570	0,255,127
chr2L	1050203	1050580	1	1	+	1050203	1050580	0,255,127
chr2L	1050210	1050580	1	12	+	1050210	1050580	0,255,127
chr2L	1050380	1050580	1	1	+	1050380	1050580	0,255,127
chr2L	1050411	1050858	1	1	+	1050411	1050858	0,255,127
chr2L	10504732	10504884	1	1	+	10504732	10504884	0,255,127
chr2L	1050490	1050862	1	1	+	1050490	1050862	0,255,127
chr2L	1050507	1061496	1	1	+	1050507	1061496	0,255,127
chr2L	105053	105557	2	2	+	105053	105557	0,255,127
chr2L	1050536	1050793	1	1	+	1050536	1050793	0,205,102
chr2L	1050586	1050731	1	1	+	1050586	1050731	0,255,127
chr2L	10506056	10506592	1	13	+	10506056	10506592	0,205,102
chr2L	10506056	10506733	1	46	+	10506056	10506733	16,78,139
chr2L	1050606	1050858	1	1	+	1050606	1050858	0,255,127
chr2L	1050611	1051042	1	1	+	1050611	1051042	0,255,127
chr2L	1050611	1226423	1	1	+	1050611	1226423	0,255,127
chr2L	10506198	10506592	1	1	+	10506198	10506592	0,205,102
chr2L	10506198	10506733	1	2	+	10506198	10506733	0,205,102
chr2L	10506395	10506592	1	1	+	10506395	10506592	0,205,102
chr2L	1050652	1050767	2	2	+	1050652	1050767	0,255,127
chr2L	10506566	10506733	1	1	+	10506566	10506733	0,205,102
chr2L	10507305	10507468	1	12	+	10507305	10507468	16,78,139
chr2L	1050733	1062092	2	2	+	1050733	1062092	0,255,127
chr2L	10507929	10508093	1	1	+	10507929	10508093	0,205,102
chr2L	10508162	10508319	1	17	+	10508162	10508319	16,78,139
chr2L	1050915	1051272	1	1	+	1050915	1051272	0,255,127
chr2L	1050921	1293870	1	1	+	1050921	1293870	0,205,102
chr2L	10509234	10509549	1	11	+	10509234	10509549	16,78,139
chr2L	1050952	1051125	1	1	+	1050952	1051125	0,255,127
chr2L	10509593	10509755	1	8	+	10509593	10509755	16,78,139
chr2L	1050983	1051328	1	1	+	1050983	1051328	0,255,127
chr2L	10510340	10511158	1	2	+	10510340	10511158	0,205,102
chr2L	1051100	1051292	2	2	+	1051100	1051292	0,255,127
chr2L	1051128	1051664	1	1	+	1051128	1051664	0,255,127
chr2L	1051136	1051265	1	1	+	1051136	1051265	0,255,127
chr2L	10511414	10511538	1	2	+	10511414	10511538	0,255,127
chr2L	10511428	10511552	1	1	+	10511428	10511552	0,255,127
chr2L	10511432	10511572	1	1	+	10511432	10511572	0,255,127
chr2L	10511751	10511884	1	1	+	10511751	10511884	0,205,102
chr2L	10511832	10516560	1	1	+	10511832	10516560	0,205,102
chr2L	10512072	10516574	1	1	+	10512072	10516574	0,255,127
chr2L	10512558	10512717	1	96	+	10512558	10512717	16,78,139
chr2L	10512819	10512984	1	205	+	10512819	10512984	16,78,139
chr2L	1051338	1051460	1	1	+	1051338	1051460	0,255,127
chr2L	10513514	10516535	1	53	+	10513514	10516535	16,78,139
chr2L	10516689	10516865	1	43	+	10516689	10516865	16,78,139
chr2L	10516843	10517044	1	276	+	10516843	10517044	16,78,139
chr2L	1051790	1051913	1	1	+	1051790	1051913	0,255,127
chr2L	10517948	10518109	1	21	+	10517948	10518109	16,78,139
[truncated: 99,640 more rows]
