# Supplementary material for: Deep sequencing the circadian and diurnal transcriptome ofDrosophilabrain
Source: HighWire-hosted journal article supplement (doi:10.1101/gr.128876.111), 2012-04-03
Supplement: Table_S12b.xlsx [file Table_S12b.xlsx]

## Sheet: Sheet1
chr3L	10000044	10000214	1	1	+	10000044	10000214	0,255,127
chr3L	10000150	10000656	1	1	+	10000150	10000656	0,205,102
chr3L	1001088	1001242	1	3	+	1001088	1001242	0,205,102
chr3L	1001088	1001272	1	3	+	1001088	1001272	0,205,102
chr3L	1001352	1001482	1	1	+	1001352	1001482	0,255,127
chr3L	1001478	1001803	1	1	+	1001478	1001803	0,205,102
chr3L	10018743	10026332	1	1	+	10018743	10026332	0,205,102
chr3L	10021081	10021320	1	1	+	10021081	10021320	0,255,127
chr3L	10023035	10027897	1	2	+	10023035	10027897	0,205,102
chr3L	10023035	10030452	2	2	+	10023035	10030452	0,205,102
chr3L	10026302	10030591	1	1	+	10026302	10030591	0,255,127
chr3L	10026474	10029795	1	93	+	10026474	10029795	16,78,139
chr3L	10027497	10027897	1	22	+	10027497	10027897	0,205,102
chr3L	10029906	10030493	1	415	+	10029906	10030493	16,78,139
chr3L	10030521	10034005	1	202	+	10030521	10034005	16,78,139
chr3L	1003146	1003261	1	85	+	1003146	1003261	0,255,127
chr3L	1003382	1003638	1	1	+	1003382	1003638	0,255,127
chr3L	10034074	10037178	1	1	+	10034074	10037178	0,205,102
chr3L	10034074	10043512	1	1	+	10034074	10043512	0,205,102
chr3L	10034074	10048063	1	1	+	10034074	10048063	0,205,102
chr3L	10034074	10048525	4	4	+	10034074	10048525	0,205,102
chr3L	10034074	10051650	1	3	+	10034074	10051650	0,205,102
chr3L	10034074	10054479	1	1	+	10034074	10054479	0,205,102
chr3L	10034074	10055116	1	57	+	10034074	10055116	0,205,102
chr3L	10034074	10057703	1	1	+	10034074	10057703	0,205,102
chr3L	10034074	10063616	1	3	+	10034074	10063616	0,205,102
chr3L	10034074	10064793	1	153	+	10034074	10064793	0,205,102
chr3L	10034074	10064811	1	297	+	10034074	10064811	0,205,102
chr3L	10034074	10066057	1	1	+	10034074	10066057	0,205,102
chr3L	10034074	10068144	1	1	+	10034074	10068144	0,205,102
chr3L	10034074	10069631	1	1	+	10034074	10069631	0,205,102
chr3L	10034090	10034257	2	2	+	10034090	10034257	0,255,127
chr3L	1003603	1003777	1	72	+	1003603	1003777	16,78,139
chr3L	1003771	1007266	1	53	+	1003771	1007266	16,78,139
chr3L	1003771	1009371	1	16	+	1003771	1009371	16,78,139
chr3L	10039911	10040678	1	1	+	10039911	10040678	0,255,127
chr3L	10040013	10040144	1	1	+	10040013	10040144	0,255,127
chr3L	10040565	10040696	1	1	+	10040565	10040696	0,255,127
chr3L	10045751	10046140	1	1	+	10045751	10046140	0,255,127
chr3L	10047494	10047620	1	1	+	10047494	10047620	0,255,127
chr3L	10048319	10048547	1	1	+	10048319	10048547	0,255,127
chr3L	10051737	10055116	1	1	+	10051737	10055116	0,205,102
chr3L	10052162	10055560	1	1	+	10052162	10055560	0,255,127
chr3L	10054400	10055116	1	1	+	10054400	10055116	0,205,102
chr3L	10054658	10054790	1	1	+	10054658	10054790	0,255,127
chr3L	10055095	10064793	1	38	+	10055095	10064793	0,205,102
chr3L	10055095	10064811	1	13	+	10055095	10064811	0,205,102
chr3L	10055499	10059995	1	1	+	10055499	10059995	0,255,127
chr3L	10055941	10325917	1	1	+	10055941	10325917	0,255,127
chr3L	10057630	10064811	1	2	+	10057630	10064811	0,205,102
chr3L	10063611	10064793	1	1	+	10063611	10064793	0,205,102
chr3L	10063611	10064811	1	5	+	10063611	10064811	0,205,102
chr3L	10064067	10064793	1	1	+	10064067	10064793	0,205,102
chr3L	10065329	10065557	1	1	+	10065329	10065557	0,255,127
chr3L	10065766	10066345	1	1	+	10065766	10066345	0,255,127
chr3L	10065838	10066378	1	1	+	10065838	10066378	0,255,127
chr3L	10068184	10069631	1	1	+	10068184	10069631	0,205,102
chr3L	1007347	1007750	1	1	+	1007347	1007750	0,255,127
chr3L	10073517	10073635	1	11	+	10073517	10073635	0,255,127
chr3L	10074310	10074426	1	2	+	10074310	10074426	0,255,127
chr3L	10078543	10078674	1	1	+	10078543	10078674	0,255,127
chr3L	10082029	10082191	1	1	+	10082029	10082191	16,78,139
chr3L	1009188	1009304	1	7	+	1009188	1009304	0,255,127
chr3L	1009329	1009494	1	35	+	1009329	1009494	16,78,139
chr3L	1009689	1018611	1	4	+	1009689	1018611	16,78,139
chr3L	1009689	1024253	1	17	+	1009689	1024253	16,78,139
chr3L	101089	102997	1	1	+	101089	102997	0,205,102
chr3L	10120939	10121314	1	1	+	10120939	10121314	0,205,102
chr3L	10137987	10138215	1	1	+	10137987	10138215	0,255,127
chr3L	1013822	1014244	1	1	+	1013822	1014244	0,255,127
chr3L	10139099	10140580	1	1	+	10139099	10140580	0,255,127
chr3L	10140751	10141002	1	1	+	10140751	10141002	0,255,127
chr3L	10140866	10140986	1	1	+	10140866	10140986	0,255,127
chr3L	10141834	10141968	1	1	+	10141834	10141968	0,255,127
chr3L	10142719	10143482	1	15	+	10142719	10143482	16,78,139
chr3L	10143551	10144125	1	56	+	10143551	10144125	16,78,139
chr3L	10144153	10146762	1	12	+	10144153	10146762	16,78,139
chr3L	10144153	10147911	1	32	+	10144153	10147911	0,205,102
chr3L	10144308	10144639	1	1	+	10144308	10144639	0,255,127
chr3L	10146800	10147911	1	6	+	10146800	10147911	16,78,139
chr3L	10148022	10149502	1	338	+	10148022	10149502	16,78,139
chr3L	10149614	10149853	1	1	+	10149614	10149853	0,205,102
chr3L	10149614	10175392	1	702	+	10149614	10175392	16,78,139
chr3L	1014984	1015538	1	1	+	1014984	1015538	0,255,127
chr3L	1015451	1015569	1	1	+	1015451	1015569	0,255,127
chr3L	10161183	10161334	1	1	+	10161183	10161334	0,255,127
chr3L	101622	102997	1	5	+	101622	102997	0,205,102
chr3L	10163090	10163220	1	1	+	10163090	10163220	0,255,127
chr3L	10163307	10163561	1	1	+	10163307	10163561	0,255,127
chr3L	10163427	10163615	1	1	+	10163427	10163615	0,255,127
chr3L	10163520	10163717	1	1	+	10163520	10163717	0,255,127
chr3L	10163631	10164466	1	1	+	10163631	10164466	0,255,127
chr3L	10165077	10165621	1	1	+	10165077	10165621	0,255,127
chr3L	10165922	10167808	1	1	+	10165922	10167808	0,255,127
chr3L	10167474	10168364	1	1	+	10167474	10168364	0,255,127
chr3L	10167675	10167804	1	1	+	10167675	10167804	0,255,127
chr3L	10167733	10167939	1	1	+	10167733	10167939	0,255,127
chr3L	10170225	10170345	1	1	+	10170225	10170345	0,255,127
chr3L	10170450	10170880	1	1	+	10170450	10170880	0,255,127
chr3L	10175350	10175484	1	11	+	10175350	10175484	0,255,127
chr3L	10175485	10179074	1	2	+	10175485	10179074	0,205,102
chr3L	10175485	10179128	1	2	+	10175485	10179128	0,205,102
chr3L	10175485	10179172	1	1	+	10175485	10179172	0,205,102
chr3L	10175565	10178301	1	3	+	10175565	10178301	0,205,102
chr3L	10175565	10179074	1	228	+	10175565	10179074	16,78,139
chr3L	10175565	10179124	2	2	+	10175565	10179124	0,205,102
chr3L	10175565	10179128	1	34	+	10175565	10179128	0,205,102
chr3L	10175565	10179152	1	1	+	10175565	10179152	0,255,127
chr3L	10175565	10179157	1	5	+	10175565	10179157	0,205,102
chr3L	10175565	10179172	1	5	+	10175565	10179172	0,205,102
chr3L	10175565	10179184	1	1	+	10175565	10179184	0,205,102
chr3L	10175565	10179234	1	1	+	10175565	10179234	16,78,139
chr3L	10175580	10179074	1	23	+	10175580	10179074	0,205,102
chr3L	10175580	10179128	1	3	+	10175580	10179128	0,205,102
chr3L	10175580	10179157	1	2	+	10175580	10179157	0,205,102
chr3L	10175580	10179172	1	3	+	10175580	10179172	16,78,139
chr3L	10175580	10179184	1	1	+	10175580	10179184	0,205,102
chr3L	10175953	10178301	2	2	+	10175953	10178301	0,205,102
chr3L	10176076	10178301	1	3	+	10176076	10178301	0,205,102
chr3L	10176076	10178307	1	1	+	10176076	10178307	0,205,102
chr3L	10176076	10178820	1	1	+	10176076	10178820	0,205,102
chr3L	10176076	10179074	1	1	+	10176076	10179074	0,205,102
chr3L	10176181	10179074	2	2	+	10176181	10179074	0,205,102
chr3L	10178452	10179074	2	2	+	10178452	10179074	0,205,102
chr3L	10178830	10179074	1	5	+	10178830	10179074	0,205,102
chr3L	10178830	10179128	1	2	+	10178830	10179128	0,205,102
chr3L	10178830	10179157	1	2	+	10178830	10179157	0,205,102
chr3L	10178867	10179028	1	1	+	10178867	10179028	0,255,127
chr3L	10178909	10179051	1	1	+	10178909	10179051	0,255,127
chr3L	10178920	10179051	1	1	+	10178920	10179051	0,255,127
chr3L	10182256	10182453	1	1	+	10182256	10182453	0,255,127
chr3L	10183642	10183811	1	17	+	10183642	10183811	16,78,139
chr3L	10183771	10183988	1	1	+	10183771	10183988	0,255,127
chr3L	10184327	10184722	1	10	+	10184327	10184722	16,78,139
chr3L	10184857	10188046	1	3	+	10184857	10188046	16,78,139
chr3L	10186158	10186316	2	2	+	10186158	10186316	0,205,102
chr3L	10187514	10187876	1	1	+	10187514	10187876	0,255,127
chr3L	10188045	10188592	1	25	+	10188045	10188592	16,78,139
chr3L	10188759	10188968	1	88	+	10188759	10188968	16,78,139
chr3L	10189021	10189357	1	70	+	10189021	10189357	16,78,139
chr3L	10189493	10194807	1	5	+	10189493	10194807	16,78,139
chr3L	1019222	1022727	1	71	+	1019222	1022727	16,78,139
chr3L	1019222	1022951	1	1	+	1019222	1022951	0,205,102
chr3L	1019476	1022727	2	2	+	1019476	1022727	0,255,127
chr3L	1019551	1019796	1	1	+	1019551	1019796	0,205,102
chr3L	1019551	1022727	1	6	+	1019551	1022727	0,205,102
chr3L	1019577	1022727	1	5	+	1019577	1022727	0,205,102
chr3L	1019752	1022711	1	1	+	1019752	1022711	0,205,102
chr3L	1019752	1022727	1	5	+	1019752	1022727	0,205,102
chr3L	1019752	1022951	1	1	+	1019752	1022951	0,205,102
chr3L	1019795	1019919	1	1	+	1019795	1019919	0,255,127
chr3L	10198872	10199357	1	2	+	10198872	10199357	0,205,102
chr3L	10199869	10200008	1	1	+	10199869	10200008	0,255,127
chr3L	1020696	1020812	1	1	+	1020696	1020812	0,255,127
chr3L	10207689	10210839	1	1	+	10207689	10210839	0,255,127
chr3L	10207689	10210933	1	1	+	10207689	10210933	0,205,102
chr3L	1020785	1020977	1	1	+	1020785	1020977	0,255,127
chr3L	10207909	10208063	1	1	+	10207909	10208063	0,255,127
chr3L	10210895	10211063	1	23	+	10210895	10211063	0,205,102
chr3L	10212543	10212699	1	26	+	10212543	10212699	16,78,139
chr3L	10213953	10217342	1	1	+	10213953	10217342	0,255,127
chr3L	10214107	10214619	1	1	+	10214107	10214619	0,255,127
chr3L	10214182	10214410	1	22	+	10214182	10214410	0,205,102
chr3L	10214182	10214543	1	788	+	10214182	10214543	16,78,139
chr3L	10214380	10214543	1	10	+	10214380	10214543	0,205,102
chr3L	10214602	10214760	1	303	+	10214602	10214760	16,78,139
chr3L	10215151	10215347	1	1	+	10215151	10215347	0,205,102
chr3L	10215151	10216055	1	20	+	10215151	10216055	16,78,139
chr3L	10215151	10217017	1	9	+	10215151	10217017	24116205
chr3L	10215154	10216055	1	11	+	10215154	10216055	0,255,127
chr3L	1021584	1021785	1	1	+	1021584	1021785	0,255,127
chr3L	10217287	10218009	1	11	+	10217287	10218009	16,78,139
chr3L	10218400	10321381	1	1	+	10218400	10321381	0,205,102
chr3L	10226676	10226843	1	1	+	10226676	10226843	0,205,102
chr3L	10227471	10227817	1	1	+	10227471	10227817	0,255,127
chr3L	10229035	10229196	1	2	+	10229035	10229196	0,255,127
chr3L	10229222	10233463	1	1	+	10229222	10233463	0,205,102
chr3L	10229263	10233040	1	1	+	10229263	10233040	0,205,102
chr3L	10229760	10229963	1	4	+	10229760	10229963	0,205,102
chr3L	10229863	10229996	1	1	+	10229863	10229996	0,205,102
chr3L	10234180	10234296	1	6	+	10234180	10234296	0,255,127
chr3L	10236429	10236581	1	19	+	10236429	10236581	16,78,139
chr3L	10236637	10236797	1	3	+	10236637	10236797	16,78,139
chr3L	10236896	10237056	1	1	+	10236896	10237056	16,78,139
chr3L	1023979	1024253	1	1	+	1023979	1024253	0,205,102
chr3L	10242986	10243584	1	1	+	10242986	10243584	0,255,127
chr3L	1024357	1024515	1	120	+	1024357	1024515	16,78,139
chr3L	10248373	10248917	1	1	+	10248373	10248917	0,255,127
chr3L	10253538	10255767	1	2	+	10253538	10255767	0,205,102
chr3L	10253754	10254071	1	1	+	10253754	10254071	0,255,127
chr3L	10255651	10256000	1	1	+	10255651	10256000	0,255,127
chr3L	10256920	10257099	1	6	+	10256920	10257099	0,205,102
chr3L	10256920	10257168	1	1	+	10256920	10257168	0,205,102
chr3L	10256920	10259059	1	1	+	10256920	10259059	0,205,102
chr3L	10256969	10257087	1	31	+	10256969	10257087	0,255,127
chr3L	1025699	1026241	1	1	+	1025699	1026241	0,255,127
chr3L	10258003	10258171	1	3	+	10258003	10258171	0,205,102
chr3L	10258230	10259059	1	1	+	10258230	10259059	0,205,102
chr3L	10259130	10261073	1	1	+	10259130	10261073	0,205,102
chr3L	10259656	10259810	1	1	+	10259656	10259810	16,78,139
chr3L	10260002	10260176	1	1	+	10260002	10260176	16,78,139
chr3L	10260002	10322904	1	1	+	10260002	10322904	0,205,102
chr3L	1026296	1026455	1	506	+	1026296	1026455	16,78,139
chr3L	10265608	10265758	1	1	+	10265608	10265758	0,205,102
chr3L	10266588	10266809	1	21	+	10266588	10266809	16,78,139
chr3L	10266866	10267131	2	2	+	10266866	10267131	0,205,102
chr3L	10267147	10267319	1	47	+	10267147	10267319	16,78,139
chr3L	10267409	10267561	1	69	+	10267409	10267561	16,78,139
chr3L	1027290	1027546	1	1	+	1027290	1027546	0,255,127
chr3L	1027629	1028044	1	1	+	1027629	1028044	0,255,127
chr3L	1028461	1029129	1	6	+	1028461	1029129	16,78,139
chr3L	10286289	10510870	1	1	+	10286289	10510870	0,255,127
chr3L	10286977	10291964	1	1	+	10286977	10291964	0,255,127
chr3L	10288757	10322904	1	1	+	10288757	10322904	0,205,102
chr3L	10292407	10292678	1	1	+	10292407	10292678	0,255,127
chr3L	10292661	10296052	1	1	+	10292661	10296052	0,255,127
chr3L	1029573	1033699	1	15	+	1029573	1033699	16,78,139
chr3L	10296046	10297509	1	1	+	10296046	10297509	0,255,127
chr3L	1030006	1030211	1	3	+	1030006	1030211	0,255,127
chr3L	10300182	10306264	1	4	+	10300182	10306264	0,205,102
chr3L	10300182	10306266	1	2	+	10300182	10306266	0,255,127
chr3L	10301349	10305202	2	2	+	10301349	10305202	0,255,127
chr3L	10303024	10303162	1	1	+	10303024	10303162	0,205,102
chr3L	10303178	10303294	2	2	+	10303178	10303294	0,255,127
chr3L	10304908	10305072	1	1	+	10304908	10305072	0,255,127
chr3L	10305229	10305735	2	2	+	10305229	10305735	0,255,127
chr3L	10306569	10311758	1	1	+	10306569	10311758	0,205,102
chr3L	10307990	10308111	1	1	+	10307990	10308111	0,255,127
chr3L	10308390	10308868	1	1	+	10308390	10308868	0,255,127
chr3L	10309356	10309510	1	1	+	10309356	10309510	0,255,127
chr3L	10311583	10311704	2	2	+	10311583	10311704	0,255,127
chr3L	10312015	10312621	1	2	+	10312015	10312621	0,205,102
chr3L	1031581	1031704	1	34	+	1031581	1031704	0,255,127
chr3L	10316921	10319786	1	6	+	10316921	10319786	0,205,102
chr3L	10316921	10341342	1	1	+	10316921	10341342	0,205,102
chr3L	10320565	10341342	1	16	+	10320565	10341342	0,205,102
chr3L	10321863	10322141	1	1	+	10321863	10322141	0,255,127
chr3L	10322130	10322277	1	1	+	10322130	10322277	0,255,127
chr3L	10322191	10322794	1	1	+	10322191	10322794	0,255,127
chr3L	10322461	10322709	1	1	+	10322461	10322709	0,255,127
chr3L	10322959	10326221	1	2	+	10322959	10326221	0,205,102
chr3L	10323356	10323793	1	1	+	10323356	10323793	0,255,127
chr3L	10323445	10323597	1	1	+	10323445	10323597	0,255,127
chr3L	10325817	10633883	1	1	+	10325817	10633883	0,255,127
chr3L	10325850	10326227	1	55	+	10325850	10326227	16,78,139
chr3L	10325850	10341342	1	62	+	10325850	10341342	0,205,102
chr3L	10325850	10352140	1	4	+	10325850	10352140	0,205,102
chr3L	10325947	10326375	2	2	+	10325947	10326375	0,255,127
chr3L	10326338	10368928	1	1	+	10326338	10368928	0,205,102
chr3L	10326338	10458699	1	1	+	10326338	10458699	0,205,102
chr3L	10326361	10341342	1	2	+	10326361	10341342	0,255,127
chr3L	10326467	10326914	1	1	+	10326467	10326914	0,255,127
chr3L	10326835	10326967	1	1	+	10326835	10326967	0,255,127
chr3L	10327200	10327569	1	1	+	10327200	10327569	0,255,127
chr3L	10328743	10341342	1	1	+	10328743	10341342	0,205,102
chr3L	10329185	10329302	1	1	+	10329185	10329302	0,255,127
chr3L	10329479	10329790	2	2	+	10329479	10329790	0,255,127
chr3L	10329758	10329920	1	1	+	10329758	10329920	0,255,127
chr3L	10329799	10330111	1	1	+	10329799	10330111	0,255,127
chr3L	10330270	10330395	1	1	+	10330270	10330395	0,255,127
chr3L	10330375	10330593	1	1	+	10330375	10330593	0,255,127
chr3L	10331173	10331421	1	2	+	10331173	10331421	0,255,127
chr3L	10331413	10331535	1	1	+	10331413	10331535	0,255,127
chr3L	10331413	10331536	1	1	+	10331413	10331536	0,255,127
chr3L	10331413	10331538	1	1	+	10331413	10331538	0,255,127
chr3L	10331413	10331766	1	1	+	10331413	10331766	0,255,127
chr3L	10331413	10331963	1	1	+	10331413	10331963	0,255,127
chr3L	10333966	10378863	1	1	+	10333966	10378863	0,255,127
chr3L	10334972	10335269	2	2	+	10334972	10335269	0,255,127
chr3L	1034000	1034374	2	2	+	1034000	1034374	0,255,127
chr3L	1034009	1034812	1	2	+	1034009	1034812	0,205,102
chr3L	1034015	1034440	1	2	+	1034015	1034440	0,205,102
chr3L	1034015	1034448	1	1	+	1034015	1034448	0,205,102
chr3L	1034015	1034601	1	3	+	1034015	1034601	0,255,127
chr3L	1034015	1034619	1	1	+	1034015	1034619	0,205,102
chr3L	1034015	1034724	1	1	+	1034015	1034724	0,255,127
chr3L	1034015	1034791	1	12	+	1034015	1034791	0,205,102
chr3L	1034015	1034803	1	12	+	1034015	1034803	16,78,139
chr3L	1034015	1034812	10	1749	+	1034015	1034812	16,78,139
chr3L	1034049	1034812	1	1	+	1034049	1034812	0,255,127
chr3L	1034051	1034295	1	1	+	1034051	1034295	0,255,127
chr3L	10341280	10352140	1	191	+	10341280	10352140	16,78,139
chr3L	10341280	10499219	1	1	+	10341280	10499219	0,205,102
chr3L	1034178	1034812	1	1	+	1034178	1034812	0,205,102
chr3L	1034205	1034748	1	1	+	1034205	1034748	0,255,127
chr3L	1034301	1034647	1	1	+	1034301	1034647	0,255,127
chr3L	10343225	10343353	1	2	+	10343225	10343353	0,255,127
chr3L	10343394	10437537	1	1	+	10343394	10437537	0,255,127
chr3L	1034463	1034724	1	1	+	1034463	1034724	0,255,127
chr3L	10347098	10347316	1	1	+	10347098	10347316	0,255,127
chr3L	10349478	10352140	1	1	+	10349478	10352140	0,205,102
chr3L	10351229	10351393	1	1	+	10351229	10351393	0,255,127
chr3L	10352240	10352532	1	1	+	10352240	10352532	0,255,127
chr3L	10352623	10352891	1	2	+	10352623	10352891	0,255,127
chr3L	10353252	10353671	1	1	+	10353252	10353671	0,255,127
chr3L	1035411	1035563	1	1	+	1035411	1035563	0,205,102
chr3L	1035411	1035595	1	2	+	1035411	1035595	0,205,102
chr3L	1035411	1035609	1	37	+	1035411	1035609	16,78,139
chr3L	10355139	10355585	1	1	+	10355139	10355585	0,255,127
chr3L	10357179	10357898	1	1	+	10357179	10357898	0,205,102
chr3L	10357179	10357953	1	1	+	10357179	10357953	0,205,102
chr3L	1035735	1036134	1	1	+	1035735	1036134	0,255,127
chr3L	1035848	1036212	1	1	+	1035848	1036212	0,255,127
chr3L	10358481	10358635	1	1	+	10358481	10358635	0,205,102
chr3L	10358610	10360113	1	1	+	10358610	10360113	0,205,102
chr3L	1035880	1036134	2	2	+	1035880	1036134	0,255,127
chr3L	1035906	1036081	1	540	+	1035906	1036081	16,78,139
chr3L	10359415	10359547	1	1	+	10359415	10359547	0,255,127
chr3L	10361076	10361619	1	1	+	10361076	10361619	0,255,127
chr3L	1036249	1155238	1	1	+	1036249	1155238	0,255,127
chr3L	1036381	1300997	1	1	+	1036381	1300997	0,255,127
chr3L	10364344	10364504	1	1	+	10364344	10364504	0,255,127
chr3L	1036507	1036633	1	1	+	1036507	1036633	0,255,127
chr3L	10365645	10365806	1	4	+	10365645	10365806	0,205,102
chr3L	10366198	10366910	1	1	+	10366198	10366910	0,205,102
chr3L	10366198	10366995	1	1	+	10366198	10366995	0,205,102
chr3L	10366198	10368157	1	1	+	10366198	10368157	0,205,102
chr3L	10366198	10368366	1	1	+	10366198	10368366	0,205,102
chr3L	10366198	10368659	1	1	+	10366198	10368659	0,205,102
chr3L	1037093	1099742	1	1	+	1037093	1099742	0,255,127
chr3L	1037307	1037575	1	1	+	1037307	1037575	0,255,127
chr3L	10381404	10569499	1	1	+	10381404	10569499	0,255,127
chr3L	1038694	1038815	1	1	+	1038694	1038815	0,255,127
chr3L	1038706	1038860	1	1	+	1038706	1038860	0,255,127
chr3L	10389316	10389475	1	1	+	10389316	10389475	0,205,102
chr3L	1039183	1039845	1	1	+	1039183	1039845	16,78,139
chr3L	1039310	1039777	1	1	+	1039310	1039777	0,205,102
chr3L	10399230	10405132	1	2	+	10399230	10405132	0,205,102
chr3L	10400479	10510870	1	1	+	10400479	10510870	0,255,127
chr3L	10400479	10683775	1	1	+	10400479	10683775	0,255,127
chr3L	1040170	1040346	1	27	+	1040170	1040346	16,78,139
chr3L	1040173	1040346	1	38	+	1040173	1040346	16,78,139
chr3L	1040304	1080927	1	1	+	1040304	1080927	0,205,102
chr3L	1040304	1099150	1	13	+	1040304	1099150	16,78,139
chr3L	1040364	1088160	1	19	+	1040364	1088160	0,205,102
chr3L	10404864	10405132	1	1	+	10404864	10405132	0,255,127
chr3L	10407986	10408338	1	1	+	10407986	10408338	0,255,127
chr3L	10408302	10453559	1	1	+	10408302	10453559	0,255,127
chr3L	10409404	10569518	1	1	+	10409404	10569518	0,255,127
chr3L	10409951	10509806	1	1	+	10409951	10509806	0,255,127
chr3L	10410180	10410561	1	1	+	10410180	10410561	0,255,127
chr3L	10410205	10410379	1	1	+	10410205	10410379	0,255,127
chr3L	10410673	10410797	1	1	+	10410673	10410797	0,255,127
chr3L	10417484	10417637	1	1	+	10417484	10417637	0,205,102
chr3L	10417804	10418975	1	1	+	10417804	10418975	0,205,102
chr3L	10432768	10504256	2	2	+	10432768	10504256	0,255,127
chr3L	10435035	10513394	1	1	+	10435035	10513394	0,255,127
chr3L	10437425	10437541	1	1	+	10437425	10437541	0,255,127
chr3L	10437452	10675151	2	2	+	10437452	10675151	0,255,127
chr3L	10437452	10797701	1	1	+	10437452	10797701	0,255,127
chr3L	10440925	10675180	1	1	+	10440925	10675180	0,255,127
chr3L	10447866	10683774	1	1	+	10447866	10683774	0,255,127
chr3L	10455828	10455986	1	240	+	10455828	10455986	16,78,139
chr3L	10458640	10462851	1	1	+	10458640	10462851	0,205,102
chr3L	10462979	10464260	1	1	+	10462979	10464260	0,205,102
chr3L	1046605	1467861	1	1	+	1046605	1467861	0,255,127
chr3L	1046605	1468017	1	2	+	1046605	1468017	0,205,102
chr3L	1047355	1055214	1	2	+	1047355	1055214	0,205,102
chr3L	10474574	10475080	1	1	+	10474574	10475080	0,255,127
chr3L	10474691	10474864	1	1	+	10474691	10474864	0,255,127
chr3L	10474779	10474918	1	3	+	10474779	10474918	0,255,127
chr3L	10474982	10499219	3	3	+	10474982	10499219	0,255,127
chr3L	10474992	10493606	1	1	+	10474992	10493606	0,255,127
chr3L	10474995	10475409	1	36	+	10474995	10475409	0,205,102
chr3L	10474995	10477774	1	1	+	10474995	10477774	0,205,102
chr3L	10474995	10478568	1	1	+	10474995	10478568	0,205,102
chr3L	10474995	10479164	1	10	+	10474995	10479164	0,205,102
chr3L	10474995	10480385	1	1	+	10474995	10480385	0,205,102
chr3L	10474995	10499219	1	4302	+	10474995	10499219	16,78,139
chr3L	10474995	10580776	1	1	+	10474995	10580776	0,205,102
chr3L	10475327	10499219	1	24	+	10475327	10499219	0,205,102
chr3L	10477908	10493220	1	3	+	10477908	10493220	0,205,102
chr3L	10478698	10499219	1	1	+	10478698	10499219	0,205,102
chr3L	10479133	10499219	1	4	+	10479133	10499219	0,205,102
chr3L	1048263	1226491	1	1	+	1048263	1226491	0,255,127
chr3L	1048305	1226562	1	1	+	1048305	1226562	0,255,127
chr3L	10487684	10488201	2	2	+	10487684	10488201	0,255,127
chr3L	10489325	10489472	1	1	+	10489325	10489472	0,255,127
chr3L	10492275	10492831	1	1	+	10492275	10492831	0,255,127
chr3L	1049234	1225524	1	1	+	1049234	1225524	0,255,127
chr3L	10493001	10493166	1	1	+	10493001	10493166	0,255,127
chr3L	10493399	10493593	1	1	+	10493399	10493593	0,205,102
chr3L	10493399	10499219	1	1	+	10493399	10499219	0,205,102
chr3L	10493517	10499227	1	1	+	10493517	10499227	0,255,127
chr3L	10493879	10499219	1	1	+	10493879	10499219	0,205,102
chr3L	10493947	10499219	1	29	+	10493947	10499219	0,205,102
chr3L	10494126	10499219	1	1	+	10494126	10499219	0,205,102
chr3L	1049465	1225315	1	2	+	1049465	1225315	0,255,127
chr3L	10494975	10499219	1	2	+	10494975	10499219	0,205,102
chr3L	10495987	10496148	1	1	+	10495987	10496148	0,255,127
chr3L	10497445	10497656	2	2	+	10497445	10497656	0,255,127
chr3L	10497465	10799661	1	1	+	10497465	10799661	0,255,127
chr3L	10497467	10565924	1	1	+	10497467	10565924	0,255,127
chr3L	10498828	10499219	1	1	+	10498828	10499219	0,205,102
chr3L	10499169	10499541	1	1	+	10499169	10499541	0,255,127
chr3L	10499257	10566705	2	2	+	10499257	10566705	0,255,127
chr3L	10499374	10499573	1	1	+	10499374	10499573	0,205,102
chr3L	10499613	10499763	1	11	+	10499613	10499763	0,205,102
chr3L	10499613	10509034	1	2	+	10499613	10509034	0,205,102
chr3L	10499613	10512761	1	70	+	10499613	10512761	0,205,102
chr3L	10499613	10524311	1	6	+	10499613	10524311	0,205,102
chr3L	10499613	10527980	1	37	+	10499613	10527980	0,205,102
chr3L	10499613	10535503	1	6	+	10499613	10535503	0,205,102
chr3L	10499613	10541148	1	32	+	10499613	10541148	0,205,102
chr3L	10499613	10547371	1	24	+	10499613	10547371	0,205,102
chr3L	10499613	10561278	1	16	+	10499613	10561278	16,78,139
chr3L	10499613	10566599	1	5	+	10499613	10566599	0,205,102
chr3L	10499613	10580776	1	1	+	10499613	10580776	0,205,102
chr3L	10499758	10512761	1	1	+	10499758	10512761	0,205,102
chr3L	10500258	10500524	1	1	+	10500258	10500524	0,205,102
chr3L	10503750	10504070	1	1	+	10503750	10504070	0,255,127
chr3L	10509146	10511111	1	1	+	10509146	10511111	16,78,139
chr3L	10509212	10511111	1	87	+	10509212	10511111	16,78,139
chr3L	10509227	10511111	1	51	+	10509227	10511111	16,78,139
chr3L	10509266	10511111	1	1	+	10509266	10511111	0,205,102
chr3L	10509385	10792059	1	1	+	10509385	10792059	0,255,127
chr3L	10509397	10511111	1	3	+	10509397	10511111	0,205,102
chr3L	10509493	10509611	1	1	+	10509493	10509611	0,255,127
chr3L	10509495	10509633	1	1	+	10509495	10509633	0,255,127
chr3L	10509497	10511111	1	4	+	10509497	10511111	0,205,102
chr3L	10509566	10511111	1	1	+	10509566	10511111	0,205,102
chr3L	10509576	10511111	1	1	+	10509576	10511111	0,205,102
chr3L	10509644	10509867	1	1	+	10509644	10509867	0,255,127
chr3L	10509835	10511111	1	1	+	10509835	10511111	0,205,102
chr3L	10509847	10511111	1	2	+	10509847	10511111	0,205,102
chr3L	10509975	10510116	1	1	+	10509975	10510116	0,255,127
chr3L	10509994	10511111	1	1	+	10509994	10511111	0,205,102
chr3L	10509998	10510416	1	1	+	10509998	10510416	0,255,127
chr3L	10510111	10511111	1	3	+	10510111	10511111	0,205,102
chr3L	10510418	10510863	1	1	+	10510418	10510863	0,255,127
chr3L	10510770	10511132	1	1	+	10510770	10511132	0,255,127
chr3L	10510770	10795367	1	1	+	10510770	10795367	0,255,127
chr3L	10511030	10584743	1	1	+	10511030	10584743	0,255,127
chr3L	10511146	10511396	1	1	+	10511146	10511396	0,255,127
chr3L	10511356	10512761	1	102	+	10511356	10512761	0,205,102
chr3L	10511356	10525281	1	2	+	10511356	10525281	0,205,102
chr3L	10511356	10527980	1	32	+	10511356	10527980	0,205,102
chr3L	10511356	10535503	1	1	+	10511356	10535503	0,205,102
chr3L	10511356	10541148	1	74	+	10511356	10541148	0,205,102
chr3L	10511356	10547371	1	46	+	10511356	10547371	0,205,102
chr3L	10511356	10561278	1	22	+	10511356	10561278	16,78,139
chr3L	10511356	10566599	1	39	+	10511356	10566599	0,205,102
chr3L	10511356	10568468	1	1	+	10511356	10568468	0,205,102
chr3L	10511356	10573458	1	3	+	10511356	10573458	0,205,102
chr3L	10513880	10514198	1	1	+	10513880	10514198	0,255,127
chr3L	10515075	10516403	1	1	+	10515075	10516403	0,205,102
chr3L	10515576	10515709	1	1	+	10515576	10515709	0,255,127
chr3L	10515609	10515724	1	1	+	10515609	10515724	0,255,127
chr3L	10517377	10518541	1	1	+	10517377	10518541	0,205,102
chr3L	10518324	10518675	1	1	+	10518324	10518675	0,255,127
chr3L	10519732	10519853	2	2	+	10519732	10519853	0,255,127
chr3L	10519888	10520084	2	2	+	10519888	10520084	0,205,102
chr3L	10525446	10525580	1	1	+	10525446	10525580	0,255,127
chr3L	10526581	10867765	1	1	+	10526581	10867765	0,255,127
chr3L	10526850	10527396	1	1	+	10526850	10527396	0,255,127
chr3L	1052832	1075541	2	2	+	1052832	1075541	0,255,127
chr3L	10528345	10541148	1	1	+	10528345	10541148	0,205,102
chr3L	10533872	10533992	1	1	+	10533872	10533992	0,255,127
chr3L	10536057	10536255	1	1	+	10536057	10536255	0,255,127
chr3L	10537917	10538312	1	1	+	10537917	10538312	0,255,127
chr3L	10538450	10538607	1	1	+	10538450	10538607	0,205,102
chr3L	10541983	10542329	1	25	+	10541983	10542329	0,255,127
chr3L	10543003	10543579	1	1	+	10543003	10543579	0,255,127
chr3L	10543369	10543486	1	1	+	10543369	10543486	0,255,127
chr3L	1054450	1093140	1	1	+	1054450	1093140	0,255,127
chr3L	1054923	1055055	1	1	+	1054923	1055055	0,255,127
chr3L	10549309	10549458	1	1	+	10549309	10549458	0,255,127
chr3L	1054936	1055069	1	4	+	1054936	1055069	0,255,127
chr3L	10550618	10550785	1	1	+	10550618	10550785	0,255,127
chr3L	10551793	10551955	2	2	+	10551793	10551955	16,78,139
chr3L	1055375	1055493	1	11	+	1055375	1055493	0,255,127
chr3L	10556378	10556838	1	1	+	10556378	10556838	0,255,127
chr3L	10559623	10560205	1	1	+	10559623	10560205	0,255,127
chr3L	10561307	10583904	1	1	+	10561307	10583904	0,255,127
chr3L	10561352	10566845	1	1	+	10561352	10566845	0,255,127
chr3L	10561355	10578666	1	1	+	10561355	10578666	0,255,127
chr3L	10561588	10566872	1	1	+	10561588	10566872	0,255,127
chr3L	10561655	10564198	1	235	+	10561655	10564198	16,78,139
chr3L	10561655	10566599	1	221	+	10561655	10566599	16,78,139
chr3L	10561655	10582505	1	1	+	10561655	10582505	0,205,102
chr3L	10561821	10561945	2	2	+	10561821	10561945	0,255,127
chr3L	10561946	10562072	1	1	+	10561946	10562072	0,255,127
chr3L	10561946	10562121	1	1	+	10561946	10562121	0,255,127
chr3L	1056366	1442491	1	1	+	1056366	1442491	0,255,127
chr3L	10564296	10566599	1	26	+	10564296	10566599	16,78,139
chr3L	10565645	10566215	2	2	+	10565645	10566215	0,255,127
chr3L	10565669	10565784	1	1	+	10565669	10565784	0,255,127
chr3L	10566347	10566475	1	13	+	10566347	10566475	0,255,127
chr3L	10566523	10580992	1	1	+	10566523	10580992	0,255,127
chr3L	10567204	10567584	1	255	+	10567204	10567584	16,78,139
chr3L	10567538	10568449	1	1	+	10567538	10568449	0,255,127
chr3L	10567538	10568468	1	1403	+	10567538	10568468	16,78,139
chr3L	10567538	10569570	1	1	+	10567538	10569570	0,205,102
chr3L	10567538	10570432	1	1	+	10567538	10570432	0,205,102
chr3L	10567538	10573458	1	10	+	10567538	10573458	0,205,102
chr3L	10568115	10570450	1	1	+	10568115	10570450	0,255,127
chr3L	10568461	10569565	1	1	+	10568461	10569565	0,255,127
chr3L	10568461	10569570	103	2504	+	10568461	10569570	16,78,139
chr3L	10568494	10568723	1	1	+	10568494	10568723	0,255,127
chr3L	10568494	10569494	1	1	+	10568494	10569494	0,255,127
chr3L	10568804	10569054	1	1	+	10568804	10569054	0,255,127
chr3L	10569211	10729415	1	1	+	10569211	10729415	0,255,127
chr3L	10569525	10570085	1	5	+	10569525	10570085	0,205,102
chr3L	10569525	10570432	10	1310	+	10569525	10570432	0,205,102
chr3L	10569525	10573458	1	113	+	10569525	10573458	16,78,139
chr3L	10569525	10580776	1	2	+	10569525	10580776	0,205,102
chr3L	10569525	10580802	1	1	+	10569525	10580802	0,205,102
chr3L	10569543	10569660	1	1	+	10569543	10569660	0,255,127
chr3L	10570268	10625017	1	1	+	10570268	10625017	0,255,127
chr3L	10570325	10570454	1	1	+	10570325	10570454	0,255,127
chr3L	10570374	10573413	2	2	+	10570374	10573413	0,255,127
chr3L	10570374	10573421	2	2	+	10570374	10573421	0,255,127
chr3L	10570374	10573458	1	467	+	10570374	10573458	16,78,139
chr3L	10570702	10570846	1	1	+	10570702	10570846	0,255,127
chr3L	10571829	10572015	1	1	+	10571829	10572015	0,255,127
chr3L	10572071	10572191	1	1	+	10572071	10572191	0,255,127
chr3L	10572075	10572191	1	1	+	10572075	10572191	0,255,127
chr3L	10572083	10583728	1	1	+	10572083	10583728	0,255,127
chr3L	10572333	10572920	1	1	+	10572333	10572920	0,255,127
chr3L	10573379	10573612	1	1	+	10573379	10573612	0,205,102
chr3L	10573379	10574156	1	2	+	10573379	10574156	0,205,102
chr3L	10573379	10574991	1	32	+	10573379	10574991	0,205,102
chr3L	10573379	10577965	1	129	+	10573379	10577965	16,78,139
chr3L	10573379	10580222	1	1	+	10573379	10580222	0,205,102
chr3L	10573379	10580776	1	113	+	10573379	10580776	0,205,102
chr3L	10573379	10582505	1	1	+	10573379	10582505	0,205,102
chr3L	10573379	10585756	1	1	+	10573379	10585756	0,205,102
chr3L	10574519	10574655	1	1	+	10574519	10574655	0,255,127
chr3L	10574611	10575160	1	1	+	10574611	10575160	0,255,127
chr3L	10574611	10575187	1	1	+	10574611	10575187	0,255,127
chr3L	10574676	10574792	1	3	+	10574676	10574792	0,205,102
chr3L	10574676	10575709	1	1	+	10574676	10575709	0,205,102
chr3L	10574710	10575187	1	1	+	10574710	10575187	0,255,127
chr3L	10575168	10580776	1	55	+	10575168	10580776	16,78,139
chr3L	10575951	10576081	1	1	+	10575951	10576081	0,255,127
chr3L	10577555	10577818	1	1	+	10577555	10577818	0,255,127
chr3L	10577555	10577888	1	1	+	10577555	10577888	0,255,127
chr3L	10577555	10577892	1	1	+	10577555	10577892	0,255,127
chr3L	10577807	10598211	1	1	+	10577807	10598211	0,255,127
chr3L	10578107	10578240	1	1	+	10578107	10578240	0,205,102
chr3L	10578237	10662076	1	1	+	10578237	10662076	0,255,127
chr3L	10578237	10867575	1	1	+	10578237	10867575	0,255,127
chr3L	10578568	10578688	1	1	+	10578568	10578688	0,255,127
chr3L	10578589	10580222	1	2	+	10578589	10580222	0,205,102
chr3L	10578589	10580776	1	58	+	10578589	10580776	16,78,139
chr3L	10578589	10582505	1	1	+	10578589	10582505	0,205,102
chr3L	10579468	10580004	1	1	+	10579468	10580004	0,255,127
chr3L	10579608	10579807	1	1	+	10579608	10579807	0,255,127
chr3L	10579623	10579827	1	1	+	10579623	10579827	0,255,127
chr3L	10579647	10579763	1	1	+	10579647	10579763	0,255,127
chr3L	10579690	10729968	1	1	+	10579690	10729968	0,255,127
chr3L	10579826	10709407	1	2	+	10579826	10709407	0,255,127
chr3L	10579826	10709411	1	1	+	10579826	10709411	0,255,127
chr3L	10579878	10580401	1	1	+	10579878	10580401	0,255,127
chr3L	10580155	10580330	1	2	+	10580155	10580330	0,205,102
chr3L	10580155	10580776	1	12	+	10580155	10580776	0,205,102
chr3L	10580310	10779518	1	1	+	10580310	10779518	0,255,127
chr3L	10580536	10580776	1	1	+	10580536	10580776	0,205,102
chr3L	10580725	10583722	1	4	+	10580725	10583722	0,255,127
chr3L	10580737	10580992	1	561	+	10580737	10580992	16,78,139
chr3L	10580737	10581809	1	4	+	10580737	10581809	0,205,102
chr3L	10580737	10582505	1	10	+	10580737	10582505	16,78,139
chr3L	10580946	10581809	1	91	+	10580946	10581809	16,78,139
chr3L	10580946	10582505	1	24	+	10580946	10582505	16,78,139
chr3L	10581669	10581788	1	1	+	10581669	10581788	0,255,127
chr3L	10581781	10582505	1	41	+	10581781	10582505	16,78,139
chr3L	10582045	10582169	1	1	+	10582045	10582169	0,255,127
chr3L	10582566	10583476	1	101	+	10582566	10583476	16,78,139
chr3L	10583440	10583670	1	928	+	10583440	10583670	16,78,139
chr3L	10583693	10583951	1	3	+	10583693	10583951	0,255,127
chr3L	10583701	10583843	1	1	+	10583701	10583843	0,205,102
chr3L	10583701	10583864	1	4	+	10583701	10583864	0,205,102
chr3L	10583712	10583864	1	2	+	10583712	10583864	0,205,102
chr3L	10583712	10583870	1	2	+	10583712	10583870	0,205,102
chr3L	10583735	10583889	1	11	+	10583735	10583889	0,205,102
chr3L	10583783	10583904	1	1	+	10583783	10583904	0,255,127
chr3L	10583793	10851711	1	1	+	10583793	10851711	0,255,127
chr3L	10583801	10678435	1	1	+	10583801	10678435	0,255,127
chr3L	10583822	10583987	2	2	+	10583822	10583987	0,255,127
chr3L	10583852	10584018	1	1	+	10583852	10584018	0,255,127
chr3L	10583890	10628638	1	1	+	10583890	10628638	0,255,127
chr3L	10583978	10584095	1	1	+	10583978	10584095	0,255,127
chr3L	10584005	10586549	1	1	+	10584005	10586549	0,255,127
chr3L	10584131	10584892	1	1	+	10584131	10584892	0,255,127
chr3L	10584780	10585238	1	1	+	10584780	10585238	0,255,127
chr3L	10584873	10585214	1	1	+	10584873	10585214	0,255,127
chr3L	10584920	10585346	1	1	+	10584920	10585346	0,255,127
chr3L	10584949	10585316	1	1	+	10584949	10585316	0,255,127
chr3L	10584983	10585198	1	1	+	10584983	10585198	0,255,127
chr3L	10585094	10585544	1	1	+	10585094	10585544	0,255,127
chr3L	10585268	10585524	1	1	+	10585268	10585524	0,255,127
chr3L	10585694	10586038	1	2	+	10585694	10586038	0,255,127
chr3L	10585773	10585891	1	1	+	10585773	10585891	0,255,127
chr3L	10586153	10586272	1	2	+	10586153	10586272	0,255,127
chr3L	10586330	10586557	1	1	+	10586330	10586557	0,255,127
chr3L	10586559	10587099	1	1	+	10586559	10587099	0,255,127
chr3L	10587066	10888140	1	1	+	10587066	10888140	0,255,127
chr3L	10587079	10852253	1	2	+	10587079	10852253	0,255,127
chr3L	10589201	10589522	1	1	+	10589201	10589522	0,255,127
chr3L	10600273	10919780	1	1	+	10600273	10919780	0,255,127
chr3L	10615740	10616343	1	1	+	10615740	10616343	0,205,102
chr3L	10619879	10620044	1	2	+	10619879	10620044	16,78,139
chr3L	10620092	10620247	1	1	+	10620092	10620247	16,78,139
chr3L	10624245	10624465	1	1	+	10624245	10624465	0,205,102
chr3L	10624245	10627224	1	5	+	10624245	10627224	16,78,139
chr3L	10624504	10624721	1	1	+	10624504	10624721	0,255,127
chr3L	10624509	10624657	1	4	+	10624509	10624657	0,205,102
chr3L	10624509	10624669	1	691	+	10624509	10624669	16,78,139
chr3L	10626368	10626525	1	168	+	10626368	10626525	16,78,139
chr3L	10627060	10627224	1	1	+	10627060	10627224	0,205,102
chr3L	10627248	10627416	1	30	+	10627248	10627416	16,78,139
chr3L	10627770	10628101	1	2	+	10627770	10628101	0,255,127
chr3L	10627879	10628083	1	1	+	10627879	10628083	0,255,127
chr3L	10628097	10628265	1	198	+	10628097	10628265	16,78,139
chr3L	10628206	10628785	1	1	+	10628206	10628785	0,255,127
chr3L	10628735	10628897	1	220	+	10628735	10628897	16,78,139
chr3L	10628987	10629145	1	49	+	10628987	10629145	16,78,139
chr3L	10629143	10629575	1	53	+	10629143	10629575	0,205,102
chr3L	10629490	10629773	1	37	+	10629490	10629773	0,205,102
chr3L	10629834	10629995	1	428	+	10629834	10629995	16,78,139
chr3L	10630142	10630624	1	1	+	10630142	10630624	0,205,102
chr3L	10630627	10630789	1	59	+	10630627	10630789	16,78,139
chr3L	10631375	10631572	1	657	+	10631375	10631572	16,78,139
chr3L	10631377	10631574	1	1	+	10631377	10631574	0,255,127
chr3L	10631544	10631703	1	53	+	10631544	10631703	16,78,139
chr3L	10631544	10631705	1	1	+	10631544	10631705	0,205,102
chr3L	10631544	10631715	1	299	+	10631544	10631715	16,78,139
chr3L	10631750	10632364	1	273	+	10631750	10632364	16,78,139
chr3L	10631842	10632364	1	2	+	10631842	10632364	0,205,102
chr3L	10632513	10632671	1	1	+	10632513	10632671	0,205,102
chr3L	10632906	10633069	1	30	+	10632906	10633069	24116205
chr3L	10633898	10634031	1	1	+	10633898	10634031	0,205,102
chr3L	10634132	10634291	1	1	+	10634132	10634291	0,255,127
chr3L	10634515	10634681	1	84	+	10634515	10634681	16,78,139
chr3L	10634844	10640012	1	175	+	10634844	10640012	16,78,139
chr3L	10635651	10635853	1	14	+	10635651	10635853	16,78,139
chr3L	10635714	10635834	1	15	+	10635714	10635834	0,255,127
chr3L	10636160	10636314	1	1	+	10636160	10636314	0,205,102
chr3L	10636338	10636867	1	1	+	10636338	10636867	0,255,127
chr3L	10636640	10636806	1	3212	+	10636640	10636806	16,78,139
chr3L	10636795	10637077	1	1	+	10636795	10637077	0,255,127
chr3L	10636795	10637086	1	1	+	10636795	10637086	0,255,127
chr3L	10636824	10637297	1	1	+	10636824	10637297	0,255,127
chr3L	10636861	10637124	1	1	+	10636861	10637124	0,255,127
chr3L	10636879	10637048	11	11	+	10636879	10637048	0,205,102
chr3L	10636905	10637056	1	1	+	10636905	10637056	0,255,127
chr3L	10636914	10637072	2	2	+	10636914	10637072	0,205,102
chr3L	10637096	10637427	1	1	+	10637096	10637427	0,255,127
chr3L	10640176	10652514	1	72	+	10640176	10652514	16,78,139
chr3L	1064290	1064406	1	1	+	1064290	1064406	0,255,127
chr3L	10647250	10647365	1	8	+	10647250	10647365	0,255,127
chr3L	10651240	10651776	2	2	+	10651240	10651776	0,255,127
chr3L	10652656	10653932	1	20	+	10652656	10653932	0,205,102
chr3L	10652682	10653932	1	7	+	10652682	10653932	0,205,102
chr3L	10652718	10653295	1	1	+	10652718	10653295	0,205,102
chr3L	10652718	10653400	1	1	+	10652718	10653400	0,205,102
chr3L	10652718	10653709	2	2	+	10652718	10653709	0,255,127
chr3L	10652718	10653754	1	5	+	10652718	10653754	0,205,102
chr3L	10652718	10653840	1	2	+	10652718	10653840	0,205,102
chr3L	10652718	10653920	1	2	+	10652718	10653920	0,205,102
chr3L	10652718	10653932	1	5401	+	10652718	10653932	16,78,139
chr3L	10652718	10653983	3	3	+	10652718	10653983	0,255,127
chr3L	10652761	10653932	1	1	+	10652761	10653932	0,205,102
chr3L	10652770	10653754	1	7	+	10652770	10653754	0,205,102
chr3L	10652770	10653932	1	280	+	10652770	10653932	0,205,102
chr3L	10652791	10653932	1	1	+	10652791	10653932	0,205,102
chr3L	10652803	10653932	1	2	+	10652803	10653932	0,205,102
chr3L	10652943	10653629	2	2	+	10652943	10653629	0,255,127
chr3L	10652995	10653932	1	2	+	10652995	10653932	0,205,102
chr3L	10654831	10654999	1	80	+	10654831	10654999	16,78,139
chr3L	10655133	10655892	1	1	+	10655133	10655892	0,255,127
chr3L	10655673	10655833	1	235	+	10655673	10655833	16,78,139
chr3L	10655834	10656026	1	1	+	10655834	10656026	0,255,127
chr3L	10656216	10704207	1	1	+	10656216	10704207	0,255,127
chr3L	10656618	10656799	1	455	+	10656618	10656799	24116205
chr3L	10656777	10656939	10	1434	+	10656777	10656939	24116205
chr3L	10656967	10657224	100	3430	+	10656967	10657224	16,78,139
chr3L	10657216	10657377	1	1	+	10657216	10657377	0,255,127
chr3L	10657218	10657377	10	1603	+	10657218	10657377	16,78,139
chr3L	10657218	10657388	1	7	+	10657218	10657388	16,78,139
chr3L	10657858	10658139	1	1	+	10657858	10658139	0,255,127
chr3L	10658130	10682367	1	1	+	10658130	10682367	0,255,127
chr3L	10658393	10678384	1	1	+	10658393	10678384	0,255,127
chr3L	10658420	10662933	1	1	+	10658420	10662933	0,205,102
chr3L	10658420	10672053	3	3	+	10658420	10672053	0,205,102
chr3L	10658420	10678159	1	136	+	10658420	10678159	16,78,139
chr3L	10658593	10659214	1	1	+	10658593	10659214	0,255,127
chr3L	10659121	10659363	1	1	+	10659121	10659363	0,255,127
chr3L	10659149	10659316	2	2	+	10659149	10659316	0,255,127
chr3L	10659158	10659316	1	1	+	10659158	10659316	0,255,127
chr3L	10659293	10659431	1	1	+	10659293	10659431	0,255,127
chr3L	10659498	10659648	1	1	+	10659498	10659648	0,255,127
chr3L	10659517	10659672	1	1	+	10659517	10659672	0,255,127
chr3L	10659550	10664372	1	1	+	10659550	10664372	0,255,127
chr3L	10659631	10659990	1	1	+	10659631	10659990	0,255,127
chr3L	10661328	10788681	1	1	+	10661328	10788681	0,255,127
chr3L	10661605	10661739	1	1	+	10661605	10661739	0,255,127
chr3L	10661931	10847210	1	1	+	10661931	10847210	0,205,102
chr3L	10663151	10663277	1	1	+	10663151	10663277	0,255,127
chr3L	10663158	10663516	1	1	+	10663158	10663516	0,255,127
chr3L	10663168	10663316	1	1	+	10663168	10663316	0,255,127
chr3L	10663201	10663540	1	1	+	10663201	10663540	0,255,127
chr3L	10663219	10663464	1	1	+	10663219	10663464	0,255,127
chr3L	10663383	10663543	1	1	+	10663383	10663543	0,255,127
chr3L	10665497	10665742	1	1	+	10665497	10665742	0,255,127
chr3L	10666866	10667404	1	1	+	10666866	10667404	0,255,127
chr3L	10667295	10667420	4	4	+	10667295	10667420	0,255,127
chr3L	10672011	10672151	1	1	+	10672011	10672151	0,255,127
chr3L	10672270	11080260	1	118	+	10672270	11080260	0,255,127
chr3L	10673998	10674129	1	1	+	10673998	10674129	0,255,127
chr3L	10674925	10675156	1	1	+	10674925	10675156	0,205,102
chr3L	10675226	10925045	1	1	+	10675226	10925045	0,205,102
chr3L	10675283	10675417	1	2	+	10675283	10675417	0,255,127
chr3L	10675474	10675916	1	1	+	10675474	10675916	0,255,127
chr3L	10675728	10675900	1	1	+	10675728	10675900	0,205,102
chr3L	10675889	10679333	2	2	+	10675889	10679333	0,205,102
chr3L	10676741	10677133	1	1	+	10676741	10677133	0,255,127
chr3L	10677252	10677752	1	1	+	10677252	10677752	0,255,127
chr3L	10678223	10678365	1	1	+	10678223	10678365	0,255,127
chr3L	10678329	10678487	1	2	+	10678329	10678487	0,255,127
chr3L	10678944	10679113	1	28	+	10678944	10679113	16,78,139
chr3L	10679311	10680201	1	153	+	10679311	10680201	16,78,139
chr3L	10679311	10680225	1	52	+	10679311	10680225	16,78,139
chr3L	10680184	10683804	1	2	+	10680184	10683804	0,255,127
chr3L	10680212	10680387	1	187	+	10680212	10680387	16,78,139
chr3L	10680389	10680554	1	99	+	10680389	10680554	16,78,139
chr3L	10680653	10680814	1	95	+	10680653	10680814	16,78,139
chr3L	10681406	10681678	1	1	+	10681406	10681678	0,255,127
chr3L	10681647	10681828	1	869	+	10681647	10681828	16,78,139
chr3L	10681817	10682238	2	2	+	10681817	10682238	0,255,127
chr3L	10681827	10682072	1	2	+	10681827	10682072	0,255,127
chr3L	10681830	10682075	13	1664	+	10681830	10682075	16,78,139
chr3L	10681893	10682075	1	8	+	10681893	10682075	16,78,139
chr3L	10681897	10682075	1	1	+	10681897	10682075	0,205,102
chr3L	10681991	10682398	1	1	+	10681991	10682398	0,255,127
chr3L	10682208	10682398	1	1	+	10682208	10682398	0,255,127
chr3L	10682308	10682427	1	1	+	10682308	10682427	0,255,127
chr3L	10682315	10682433	1	1	+	10682315	10682433	0,255,127
chr3L	10682350	10682483	1	2	+	10682350	10682483	0,255,127
chr3L	10682476	10683321	1	1	+	10682476	10683321	0,255,127
chr3L	10682615	10709125	1	2	+	10682615	10709125	0,255,127
chr3L	10682615	10829426	1	1	+	10682615	10829426	0,255,127
chr3L	10682625	10729415	1	1	+	10682625	10729415	0,255,127
chr3L	10683215	10683551	1	1	+	10683215	10683551	0,255,127
chr3L	10683783	10747304	1	1	+	10683783	10747304	0,255,127
chr3L	10683783	10851457	1	1	+	10683783	10851457	0,255,127
chr3L	10683787	10788693	1	1	+	10683787	10788693	0,255,127
chr3L	10683787	10867801	1	1	+	10683787	10867801	0,255,127
chr3L	10685171	10685552	1	1	+	10685171	10685552	0,255,127
chr3L	10685763	10685912	1	1	+	10685763	10685912	0,255,127
chr3L	10685779	10685945	1	2	+	10685779	10685945	0,255,127
chr3L	10685821	10685996	1	1	+	10685821	10685996	0,255,127
chr3L	10685858	10686038	1	39	+	10685858	10686038	16,78,139
chr3L	10686556	10686855	1	243	+	10686556	10686855	16,78,139
chr3L	10686910	10687146	1	1	+	10686910	10687146	0,205,102
chr3L	10686917	10687146	1	203	+	10686917	10687146	16,78,139
chr3L	10687517	10687679	1	1	+	10687517	10687679	0,205,102
chr3L	10687776	10688173	1	690	+	10687776	10688173	16,78,139
chr3L	10688417	10688778	1	395	+	10688417	10688778	16,78,139
chr3L	10688465	10688627	1	10	+	10688465	10688627	0,205,102
chr3L	10688465	10688778	1	100	+	10688465	10688778	16,78,139
chr3L	10688754	10689716	1	71	+	10688754	10689716	16,78,139
chr3L	10688754	10689728	1	129	+	10688754	10689728	16,78,139
chr3L	10695547	10695704	1	5	+	10695547	10695704	0,205,102
chr3L	1069892	1070082	1	1	+	1069892	1070082	0,255,127
chr3L	10699662	10699849	1	1	+	10699662	10699849	0,255,127
chr3L	10700435	10714793	1	7	+	10700435	10714793	0,205,102
chr3L	10700838	10703906	1	9	+	10700838	10703906	0,205,102
chr3L	10700838	10704757	1	1	+	10700838	10704757	0,205,102
chr3L	10700838	10708795	1	5	+	10700838	10708795	0,205,102
chr3L	10700838	10714793	1	1	+	10700838	10714793	0,205,102
chr3L	10703513	10707456	1	1	+	10703513	10707456	0,205,102
chr3L	10704299	10704757	1	2	+	10704299	10704757	0,205,102
chr3L	10704708	10707581	1	1	+	10704708	10707581	0,255,127
chr3L	10704708	10708795	1	1	+	10704708	10708795	0,255,127
chr3L	10707551	10707708	1	1	+	10707551	10707708	0,255,127
chr3L	10707551	10708795	2	2	+	10707551	10708795	0,205,102
chr3L	10708556	10709065	1	1	+	10708556	10709065	0,255,127
chr3L	1070923	1468293	1	1	+	1070923	1468293	0,255,127
chr3L	10709254	10709423	1	1	+	10709254	10709423	0,205,102
chr3L	10716087	10754204	1	1	+	10716087	10754204	0,255,127
chr3L	10725534	10727158	1	1	+	10725534	10727158	0,205,102
chr3L	10727203	10727683	1	1	+	10727203	10727683	0,205,102
chr3L	10727318	10727893	1	1	+	10727318	10727893	0,205,102
chr3L	10730524	10741303	4	4	+	10730524	10741303	0,205,102
chr3L	10730567	10730759	1	1	+	10730567	10730759	0,255,127
chr3L	10730652	10730806	2	2	+	10730652	10730806	0,255,127
chr3L	10730652	10730853	1	1	+	10730652	10730853	0,255,127
chr3L	10730652	10730893	1	1	+	10730652	10730893	0,255,127
chr3L	10730652	10730896	1	1	+	10730652	10730896	0,255,127
chr3L	10730808	10733701	1	1	+	10730808	10733701	0,255,127
chr3L	10730808	11111048	2	2	+	10730808	11111048	0,255,127
chr3L	10732238	10753142	1	1	+	10732238	10753142	0,255,127
chr3L	10734299	10734441	1	1	+	10734299	10734441	0,255,127
chr3L	10739431	10741377	2	2	+	10739431	10741377	0,255,127
chr3L	10740124	10740300	1	1	+	10740124	10740300	0,205,102
chr3L	10740153	10758976	1	1	+	10740153	10758976	0,205,102
chr3L	10740667	11105517	1	1	+	10740667	11105517	0,255,127
chr3L	10750395	10750572	1	1	+	10750395	10750572	0,205,102
chr3L	10750728	10755017	1	1	+	10750728	10755017	0,205,102
chr3L	10753052	10851472	1	1	+	10753052	10851472	0,255,127
chr3L	10753946	10754086	2	2	+	10753946	10754086	0,255,127
chr3L	10757303	10759263	4	4	+	10757303	10759263	0,205,102
chr3L	1076247	1076367	1	41	+	1076247	1076367	0,255,127
chr3L	10762782	10777441	1	2	+	10762782	10777441	0,205,102
chr3L	10764004	10764242	1	1	+	10764004	10764242	0,205,102
chr3L	10765235	10765942	1	1	+	10765235	10765942	0,205,102
chr3L	10765407	10765937	1	1	+	10765407	10765937	0,205,102
chr3L	10765413	10765589	1	1	+	10765413	10765589	16,78,139
chr3L	10765413	10765937	1	11	+	10765413	10765937	0,205,102
chr3L	10765602	10765937	1	1	+	10765602	10765937	16,78,139
chr3L	10766279	10766453	1	8	+	10766279	10766453	0,205,102
chr3L	10767076	11107635	1	1	+	10767076	11107635	0,255,127
chr3L	10771903	10772026	1	2	+	10771903	10772026	0,255,127
chr3L	10772579	10822773	1	1	+	10772579	10822773	0,255,127
chr3L	10772986	10778041	1	2	+	10772986	10778041	0,205,102
chr3L	10775346	10775913	1	1	+	10775346	10775913	0,255,127
chr3L	10777676	10778041	1	462	+	10777676	10778041	16,78,139
chr3L	10778856	10779010	1	1	+	10778856	10779010	0,255,127
chr3L	10778931	11111087	1	1	+	10778931	11111087	0,255,127
chr3L	10780276	10798448	1	1	+	10780276	10798448	0,205,102
chr3L	10780802	10804020	1	2	+	10780802	10804020	0,255,127
chr3L	10781059	10781293	1	1	+	10781059	10781293	0,255,127
chr3L	1078774	1088160	1	1	+	1078774	1088160	0,205,102
chr3L	10791975	10867796	1	1	+	10791975	10867796	0,255,127
chr3L	10794361	10794533	1	1	+	10794361	10794533	0,255,127
chr3L	1079622	1080927	1	1	+	1079622	1080927	0,205,102
chr3L	1079622	1099150	1	17	+	1079622	1099150	16,78,139
chr3L	10797846	10804020	1	3	+	10797846	10804020	0,205,102
chr3L	10798435	10807824	1	1	+	10798435	10807824	0,205,102
chr3L	10799126	10799321	2	2	+	10799126	10799321	0,255,127
chr3L	10799126	10799439	1	1	+	10799126	10799439	0,205,102
chr3L	10799126	10804020	1	1	+	10799126	10804020	0,205,102
chr3L	10799128	10804022	1	1	+	10799128	10804022	0,255,127
chr3L	10799507	10804020	1	10	+	10799507	10804020	0,205,102
chr3L	10802809	10803980	1	1	+	10802809	10803980	0,205,102
chr3L	10802809	10806351	1	1	+	10802809	10806351	0,205,102
chr3L	10802809	10821918	1	4	+	10802809	10821918	0,205,102
chr3L	10806022	10806351	1	1	+	10806022	10806351	0,205,102
chr3L	10806026	10806351	1	4	+	10806026	10806351	0,205,102
chr3L	10806473	10806658	1	1	+	10806473	10806658	0,255,127
chr3L	10806666	10806895	1	1	+	10806666	10806895	0,255,127
chr3L	10819306	10823130	1	1	+	10819306	10823130	0,255,127
chr3L	10821099	10821440	1	2	+	10821099	10821440	0,205,102
chr3L	10821099	10821918	1	1	+	10821099	10821918	0,205,102
chr3L	10821479	10821918	1	1	+	10821479	10821918	0,205,102
chr3L	10822061	10827529	1	1	+	10822061	10827529	0,205,102
chr3L	10822061	10835918	1	2	+	10822061	10835918	0,205,102
chr3L	10822061	10863190	1	3	+	10822061	10863190	0,205,102
chr3L	10827587	10827765	1	1	+	10827587	10827765	0,205,102
chr3L	10827587	10828106	1	1	+	10827587	10828106	0,205,102
chr3L	10828795	10863190	1	2	+	10828795	10863190	16,78,139
chr3L	1083882	1084037	1	1	+	1083882	1084037	0,255,127
chr3L	10842582	11072130	1	1	+	10842582	11072130	0,255,127
chr3L	10843315	10956515	1	1	+	10843315	10956515	0,255,127
chr3L	10843552	10843733	1	18	+	10843552	10843733	16,78,139
chr3L	10843552	10845597	1	10	+	10843552	10845597	0,205,102
chr3L	10843753	10844053	1	1	+	10843753	10844053	0,205,102
chr3L	10843753	10845597	1	5	+	10843753	10845597	0,205,102
chr3L	10843753	10850405	2	4	+	10843753	10850405	0,205,102
chr3L	10843753	10850815	1	1	+	10843753	10850815	0,205,102
chr3L	10844410	10844525	1	7	+	10844410	10844525	0,255,127
chr3L	10844757	10844933	1	1	+	10844757	10844933	0,205,102
chr3L	10845448	10845612	1	14	+	10845448	10845612	0,255,127
chr3L	10845458	10845612	2	2	+	10845458	10845612	0,255,127
chr3L	10845745	10850295	1	1	+	10845745	10850295	0,205,102
chr3L	10845745	10850405	1	2	+	10845745	10850405	0,205,102
chr3L	10845775	10849360	1	1	+	10845775	10849360	0,255,127
chr3L	10847643	10851822	1	1	+	10847643	10851822	0,205,102
chr3L	10848760	10863332	1	1	+	10848760	10863332	0,255,127
chr3L	10850188	10850522	1	1	+	10850188	10850522	0,205,102
chr3L	10850242	10850405	1	37	+	10850242	10850405	0,255,127
chr3L	10850559	10850842	1	1	+	10850559	10850842	0,205,102
chr3L	10851072	10851193	1	1	+	10851072	10851193	0,255,127
chr3L	10851101	10851381	1	1	+	10851101	10851381	0,255,127
chr3L	10851101	11160019	1	1	+	10851101	11160019	0,255,127
chr3L	10851116	10851270	1	1	+	10851116	10851270	0,255,127
chr3L	10851170	10851680	1	1	+	10851170	10851680	0,255,127
chr3L	10851269	10851508	1	1	+	10851269	10851508	0,255,127
chr3L	10851492	10852093	1	1	+	10851492	10852093	0,255,127
chr3L	10851499	10851822	1	2	+	10851499	10851822	0,205,102
chr3L	10851509	10851822	1	3	+	10851509	10851822	0,205,102
chr3L	10851523	10851911	1	3	+	10851523	10851911	0,255,127
chr3L	10851523	10851958	1	2	+	10851523	10851958	0,255,127
chr3L	10851736	10852256	1	1	+	10851736	10852256	0,255,127
chr3L	10851736	10863190	1	103	+	10851736	10863190	16,78,139
chr3L	10851960	10852469	1	1	+	10851960	10852469	0,255,127
chr3L	10852014	10852141	1	1	+	10852014	10852141	0,255,127
chr3L	10852104	10863190	1	342	+	10852104	10863190	16,78,139
chr3L	10852757	10852978	1	7	+	10852757	10852978	0,255,127
chr3L	10853281	10853409	1	1	+	10853281	10853409	0,255,127
chr3L	10853680	10853883	1	4	+	10853680	10853883	0,205,102
chr3L	10854636	11155130	1	1	+	10854636	11155130	0,255,127
chr3L	10855083	10863190	1	1	+	10855083	10863190	0,205,102
chr3L	10856198	10856321	1	1	+	10856198	10856321	0,255,127
chr3L	10856369	10856938	1	1	+	10856369	10856938	0,255,127
chr3L	10856488	10856609	1	1	+	10856488	10856609	0,255,127
chr3L	10856655	10856921	1	1	+	10856655	10856921	0,255,127
chr3L	10856965	10857202	1	1	+	10856965	10857202	0,255,127
chr3L	10857333	10857479	1	1	+	10857333	10857479	0,255,127
chr3L	10857418	10857995	1	1	+	10857418	10857995	0,255,127
chr3L	10859611	10859887	1	2	+	10859611	10859887	0,205,102
chr3L	10859874	10861007	1	1	+	10859874	10861007	0,205,102
chr3L	1086002	1086373	1	1	+	1086002	1086373	0,255,127
chr3L	1086029	1086373	2	2	+	1086029	1086373	0,205,102
chr3L	10861085	10861221	1	1	+	10861085	10861221	0,255,127
chr3L	10861431	10861835	1	1	+	10861431	10861835	0,205,102
chr3L	10861431	10863190	1	2	+	10861431	10863190	0,205,102
chr3L	10861458	10861686	1	1	+	10861458	10861686	0,255,127
chr3L	10861458	10863190	2	2	+	10861458	10863190	0,205,102
chr3L	10861617	10861884	1	1	+	10861617	10861884	0,255,127
chr3L	10861619	10861885	1	1	+	10861619	10861885	0,255,127
chr3L	1086183	1496900	1	1	+	1086183	1496900	0,255,127
chr3L	10862609	10862836	1	1	+	10862609	10862836	0,205,102
chr3L	10862609	10863190	1	4	+	10862609	10863190	0,205,102
chr3L	10863109	10866831	1	1	+	10863109	10866831	0,255,127
chr3L	10863186	10863331	1	1	+	10863186	10863331	0,255,127
chr3L	10863202	10863362	1	1	+	10863202	10863362	0,255,127
chr3L	10863208	10942982	1	1	+	10863208	10942982	0,255,127
chr3L	10863214	10867719	1	1	+	10863214	10867719	0,255,127
chr3L	10863214	10867726	1	2	+	10863214	10867726	0,255,127
chr3L	10863232	10867743	1	1	+	10863232	10867743	0,255,127
chr3L	10863235	10863398	1	1	+	10863235	10863398	0,255,127
chr3L	10863241	10863398	1	1	+	10863241	10863398	0,255,127
chr3L	10863253	10867743	1	1	+	10863253	10867743	0,255,127
chr3L	10863265	10863398	1	1	+	10863265	10863398	0,255,127
chr3L	10863271	10863674	1	1	+	10863271	10863674	0,255,127
chr3L	10863272	10863414	1	1	+	10863272	10863414	0,255,127
chr3L	10863301	10867769	1	1	+	10863301	10867769	0,255,127
chr3L	10863337	10863641	2	2	+	10863337	10863641	0,255,127
chr3L	10863392	10864549	1	1	+	10863392	10864549	0,255,127
chr3L	10863412	10866328	1	1	+	10863412	10866328	0,255,127
chr3L	10863550	10867743	1	1	+	10863550	10867743	0,255,127
chr3L	10863555	10866794	1	1	+	10863555	10866794	0,255,127
chr3L	10863588	10867564	1	1	+	10863588	10867564	0,255,127
chr3L	10863643	10863867	1	19	+	10863643	10863867	16,78,139
chr3L	10863798	10867169	1	1	+	10863798	10867169	0,255,127
chr3L	10863822	10867057	1	1	+	10863822	10867057	0,255,127
chr3L	10863891	10864528	1	1	+	10863891	10864528	0,255,127
chr3L	10863929	10864479	1	169	+	10863929	10864479	16,78,139
chr3L	10863929	10864497	1	1	+	10863929	10864497	0,205,102
chr3L	10864454	10864590	2	2	+	10864454	10864590	0,255,127
chr3L	10864579	10867172	1	1	+	10864579	10867172	0,255,127
chr3L	10864604	10865343	1	5	+	10864604	10865343	0,255,127
chr3L	10865149	10865308	1	808	+	10865149	10865308	16,78,139
chr3L	10865243	10865541	1	1	+	10865243	10865541	0,255,127
chr3L	10865327	10865494	10	882	+	10865327	10865494	16,78,139
chr3L	10865527	10865694	1	380	+	10865527	10865694	16,78,139
chr3L	10865808	10865983	1	32	+	10865808	10865983	16,78,139
chr3L	10866006	10937629	1	1	+	10866006	10937629	0,255,127
chr3L	10866610	10867734	1	1	+	10866610	10867734	0,255,127
chr3L	10866626	10866794	1	268	+	10866626	10866794	16,78,139
chr3L	10866824	10867027	1	243	+	10866824	10867027	16,78,139
chr3L	10867175	10867564	2	2	+	10867175	10867564	0,255,127
chr3L	10867308	10867542	1	1	+	10867308	10867542	0,255,127
chr3L	10867312	10867483	1	2	+	10867312	10867483	0,255,127
chr3L	10867314	10867485	10	1544	+	10867314	10867485	16,78,139
chr3L	10867597	10868059	1	1	+	10867597	10868059	0,255,127
chr3L	10867662	11113131	1	1	+	10867662	11113131	0,255,127
chr3L	10867674	11239629	1	1	+	10867674	11239629	0,255,127
chr3L	10867684	10867802	2	2	+	10867684	10867802	0,255,127
chr3L	10867684	10979666	1	3	+	10867684	10979666	0,255,127
chr3L	10867684	11239636	2	2	+	10867684	11239636	0,255,127
chr3L	10867690	10869654	1	1	+	10867690	10869654	0,255,127
chr3L	10867768	10867975	1	1	+	10867768	10867975	0,255,127
chr3L	10868487	10868606	1	1	+	10868487	10868606	0,255,127
chr3L	10868597	10869076	1	1	+	10868597	10869076	0,255,127
chr3L	10869076	11159967	1	1	+	10869076	11159967	0,255,127
chr3L	10869134	11248015	1	1	+	10869134	11248015	0,255,127
chr3L	10869936	10871491	1	1	+	10869936	10871491	0,255,127
chr3L	10869967	10870358	1	1	+	10869967	10870358	0,255,127
chr3L	10870028	10870208	1	1	+	10870028	10870208	0,205,102
chr3L	10870074	10870218	1	1	+	10870074	10870218	0,255,127
chr3L	10871286	10871446	1	1	+	10871286	10871446	0,255,127
chr3L	10872363	10872517	1	58	+	10872363	10872517	16,78,139
chr3L	10873851	10874119	1	2	+	10873851	10874119	0,255,127
chr3L	10874003	10874189	1	1	+	10874003	10874189	0,255,127
chr3L	10874150	10874607	2	2	+	10874150	10874607	0,255,127
chr3L	10874345	10874547	1	1	+	10874345	10874547	0,255,127
chr3L	10874406	10874785	1	1	+	10874406	10874785	0,255,127
chr3L	10874447	10874646	1	1	+	10874447	10874646	0,255,127
chr3L	10874456	10874655	1	2	+	10874456	10874655	0,255,127
chr3L	10874912	10875156	1	86	+	10874912	10875156	16,78,139
chr3L	10876133	10876288	1	41	+	10876133	10876288	16,78,139
chr3L	10877682	10877947	1	1	+	10877682	10877947	0,255,127
chr3L	10877709	10877883	1	606	+	10877709	10877883	16,78,139
chr3L	10878840	10879051	1	2	+	10878840	10879051	16,78,139
chr3L	1088173	1091773	1	1	+	1088173	1091773	0,205,102
chr3L	1088173	1166849	1	1	+	1088173	1166849	0,205,102
chr3L	10887675	10887849	1	1	+	10887675	10887849	0,205,102
chr3L	10887689	10888147	1	1	+	10887689	10888147	0,255,127
chr3L	10887923	10888132	1	1	+	10887923	10888132	0,255,127
chr3L	10888100	10888254	1	1	+	10888100	10888254	0,255,127
chr3L	10888170	10888401	1	1	+	10888170	10888401	0,255,127
chr3L	10888184	10891885	1	1	+	10888184	10891885	0,205,102
chr3L	10888233	10888809	1	1	+	10888233	10888809	0,255,127
chr3L	10888434	11263468	1	1	+	10888434	11263468	0,255,127
chr3L	10888665	10888924	1	1	+	10888665	10888924	0,255,127
chr3L	10888680	10888809	1	2	+	10888680	10888809	0,255,127
chr3L	10888709	10888871	1	1	+	10888709	10888871	0,255,127
chr3L	10888972	10889168	1	1	+	10888972	10889168	0,255,127
chr3L	10888986	10889341	1	1	+	10888986	10889341	0,255,127
chr3L	10889139	10891283	1	1	+	10889139	10891283	0,255,127
chr3L	10889150	10889410	1	1	+	10889150	10889410	0,255,127
chr3L	10889176	10889958	2	2	+	10889176	10889958	0,255,127
chr3L	10889255	10891154	1	1	+	10889255	10891154	0,255,127
chr3L	10889264	10889380	2	2	+	10889264	10889380	0,205,102
chr3L	10889363	10891176	1	1	+	10889363	10891176	0,255,127
chr3L	10889459	10889618	10	1014	+	10889459	10889618	16,78,139
chr3L	10889674	10889928	102	2899	+	10889674	10889928	16,78,139
chr3L	10889895	10891154	1	1	+	10889895	10891154	0,255,127
chr3L	10889927	10890084	1	1	+	10889927	10890084	0,205,102
chr3L	10889927	10891047	1	1	+	10889927	10891047	0,205,102
chr3L	10889927	10891127	120	3780	+	10889927	10891127	16,78,139
chr3L	10890312	10891127	1	2	+	10890312	10891127	0,205,102
chr3L	10890537	10891127	1	1	+	10890537	10891127	0,205,102
chr3L	10890600	10891127	1	1	+	10890600	10891127	0,205,102
chr3L	10891110	10891228	1	1	+	10891110	10891228	0,255,127
chr3L	10891174	10891314	1	1	+	10891174	10891314	0,255,127
chr3L	10891191	10891617	1	1	+	10891191	10891617	0,255,127
chr3L	10891331	10891749	1	1	+	10891331	10891749	0,205,102
chr3L	10891494	10891746	1	1	+	10891494	10891746	0,205,102
chr3L	10891494	10891749	1	17	+	10891494	10891749	0,205,102
chr3L	10891494	10891801	2	2	+	10891494	10891801	0,205,102
chr3L	10891494	10891873	1	3	+	10891494	10891873	0,205,102
chr3L	10891494	10891885	1	102	+	10891494	10891885	16,78,139
chr3L	10891543	10891688	1	1	+	10891543	10891688	0,255,127
chr3L	10891543	10891720	1	1	+	10891543	10891720	0,255,127
chr3L	10891645	10891885	1	1	+	10891645	10891885	0,205,102
chr3L	10891678	10891916	1	1	+	10891678	10891916	0,255,127
chr3L	10891981	10892200	1	1	+	10891981	10892200	0,205,102
chr3L	10896153	10896336	1	1	+	10896153	10896336	0,205,102
chr3L	10897033	11070966	1	3	+	10897033	11070966	0,255,127
chr3L	1090987	1091275	1	1	+	1090987	1091275	0,255,127
chr3L	10913512	11247788	1	1	+	10913512	11247788	0,255,127
chr3L	10924984	11282417	1	1	+	10924984	11282417	0,255,127
chr3L	10924995	11260559	1	1	+	10924995	11260559	0,255,127
chr3L	10924995	11321388	1	1	+	10924995	11321388	0,255,127
chr3L	10924999	10925268	1	1	+	10924999	10925268	0,255,127
chr3L	10924999	11001186	1	1	+	10924999	11001186	0,255,127
chr3L	1093054	1220252	1	1	+	1093054	1220252	0,255,127
chr3L	10931353	11105422	1	1	+	10931353	11105422	0,255,127
chr3L	10937556	11109943	1	1	+	10937556	11109943	0,255,127
chr3L	10942821	10942985	1	1	+	10942821	10942985	0,205,102
chr3L	1095027	1095143	1	1	+	1095027	1095143	0,255,127
chr3L	1096094	1096450	1	1	+	1096094	1096450	0,255,127
chr3L	10965793	10965961	1	1	+	10965793	10965961	16,78,139
chr3L	10972144	11111038	1	1	+	10972144	11111038	0,255,127
chr3L	1097369	1097505	1	1	+	1097369	1097505	0,255,127
chr3L	1097369	1097511	1	1	+	1097369	1097511	0,255,127
chr3L	10978122	10989376	1	6	+	10978122	10989376	16,78,139
chr3L	10984150	11189951	1	1	+	10984150	11189951	0,255,127
chr3L	10989756	10990011	1	1	+	10989756	10990011	0,255,127
chr3L	10990968	10991471	3	3	+	10990968	10991471	0,255,127
chr3L	10993783	10996239	1	1	+	10993783	10996239	0,205,102
chr3L	10999236	10999478	1	1	+	10999236	10999478	0,205,102
chr3L	11000490	11000666	1	1	+	11000490	11000666	0,255,127
chr3L	11001826	11002280	1	1	+	11001826	11002280	0,255,127
chr3L	1100784	1100918	2	2	+	1100784	1100918	0,255,127
chr3L	1100800	1100928	1	1	+	1100800	1100928	0,255,127
chr3L	11013835	11111068	1	1	+	11013835	11111068	0,255,127
chr3L	1102004	1129353	1	1	+	1102004	1129353	0,205,102
chr3L	11020972	11021133	1	1	+	11020972	11021133	16,78,139
chr3L	11023104	11023913	1	1	+	11023104	11023913	0,255,127
chr3L	11028479	11270661	1	1	+	11028479	11270661	0,255,127
chr3L	11029809	11029927	1	1	+	11029809	11029927	0,255,127
chr3L	11030294	11030545	1	173	+	11030294	11030545	16,78,139
chr3L	11030557	11031042	2	2	+	11030557	11031042	0,205,102
chr3L	11030605	11030771	1	438	+	11030605	11030771	16,78,139
chr3L	11031484	11032767	1	72	+	11031484	11032767	16,78,139
chr3L	11032814	11033147	1	119	+	11032814	11033147	16,78,139
chr3L	11033118	11039327	1	3	+	11033118	11039327	16,78,139
chr3L	11033118	11044411	1	32	+	11033118	11044411	16,78,139
chr3L	11033471	11033619	1	1	+	11033471	11033619	0,205,102
chr3L	11038445	11048985	1	1	+	11038445	11048985	0,255,127
chr3L	11039401	11039643	1	2	+	11039401	11039643	16,78,139
chr3L	11039401	11044411	1	2	+	11039401	11044411	0,205,102
chr3L	11040705	11041076	1	3	+	11040705	11041076	0,255,127
chr3L	11040931	11044411	1	17	+	11040931	11044411	0,205,102
chr3L	11041225	11041578	1	1	+	11041225	11041578	0,255,127
chr3L	11044067	11044411	1	1	+	11044067	11044411	0,205,102
chr3L	11046637	11046961	1	1	+	11046637	11046961	0,205,102
chr3L	11047168	11050703	1	1	+	11047168	11050703	0,255,127
chr3L	11047331	11047492	1	1	+	11047331	11047492	0,255,127
chr3L	11047409	11048793	1	1	+	11047409	11048793	0,205,102
chr3L	11047409	11050298	1	5	+	11047409	11050298	0,205,102
chr3L	11047409	11050703	1	1603	+	11047409	11050703	16,78,139
chr3L	11047413	11050703	1	3	+	11047413	11050703	0,205,102
chr3L	11047475	11050703	1	1	+	11047475	11050703	0,205,102
chr3L	11048903	11050703	1	1	+	11048903	11050703	16,78,139
chr3L	1104934	1105432	1	1	+	1104934	1105432	0,255,127
chr3L	11050235	11050703	1	17	+	11050235	11050703	16,78,139
chr3L	11050757	11050915	1	710	+	11050757	11050915	16,78,139
chr3L	11050761	11050915	1	1	+	11050761	11050915	0,255,127
chr3L	11050950	11052197	1	1	+	11050950	11052197	0,255,127
chr3L	11051002	11051164	1	432	+	11051002	11051164	16,78,139
chr3L	11051441	11052156	1	1	+	11051441	11052156	0,255,127
chr3L	11051656	11052346	1	1	+	11051656	11052346	0,255,127
chr3L	11051690	11051850	104	4610	+	11051690	11051850	16,78,139
chr3L	11051690	11051870	1	1	+	11051690	11051870	0,205,102
chr3L	11051780	11051922	1	1	+	11051780	11051922	0,255,127
chr3L	11051926	11052094	101	3255	+	11051926	11052094	16,78,139
chr3L	11052074	11052322	1	2	+	11052074	11052322	0,255,127
chr3L	11052150	11052308	10	3934	+	11052150	11052308	16,78,139
chr3L	11052222	11052523	1	1	+	11052222	11052523	0,255,127
chr3L	11052246	11052400	1	1	+	11052246	11052400	0,205,102
chr3L	11052276	11052529	1	1	+	11052276	11052529	0,255,127
chr3L	11052353	11052499	109	7024	+	11052353	11052499	16,78,139
chr3L	11052353	11052504	1	638	+	11052353	11052504	0,205,102
chr3L	11052391	11107727	1	1	+	11052391	11107727	0,255,127
chr3L	11052452	11052619	1	3	+	11052452	11052619	0,205,102
chr3L	11052470	11052646	1	96	+	11052470	11052646	0,205,102
chr3L	11052511	11500397	1	1	+	11052511	11500397	0,255,127
chr3L	11052538	11373081	1	1	+	11052538	11373081	0,255,127
chr3L	11052575	11105517	2	2	+	11052575	11105517	0,255,127
chr3L	11052592	11105538	1	1	+	11052592	11105538	0,255,127
chr3L	11052664	11491490	1	1	+	11052664	11491490	0,255,127
chr3L	11052696	11053054	1	1	+	11052696	11053054	0,255,127
chr3L	11053399	11053569	1	67	+	11053399	11053569	16,78,139
chr3L	11053771	11053935	1	22	+	11053771	11053935	16,78,139
chr3L	11053957	11054117	1	9	+	11053957	11054117	16,78,139
chr3L	11053957	11054122	1	1	+	11053957	11054122	0,205,102
chr3L	11055278	11055440	1	299	+	11055278	11055440	16,78,139
chr3L	11055439	11055605	1	176	+	11055439	11055605	16,78,139
chr3L	11055873	11056052	1	319	+	11055873	11056052	16,78,139
chr3L	11056156	11056336	1	4	+	11056156	11056336	16,78,139
chr3L	11056173	11056336	1	711	+	11056173	11056336	16,78,139
chr3L	11056451	11056611	1	718	+	11056451	11056611	16,78,139
chr3L	11057511	11057670	1	97	+	11057511	11057670	16,78,139
chr3L	11058772	11058979	1	33	+	11058772	11058979	16,78,139
chr3L	11059079	11059245	1	184	+	11059079	11059245	16,78,139
chr3L	11059324	11059510	1	392	+	11059324	11059510	16,78,139
chr3L	11059811	11060016	1	1	+	11059811	11060016	0,255,127
chr3L	11059941	11060121	2	2	+	11059941	11060121	0,255,127
chr3L	11060180	11060332	1	32	+	11060180	11060332	0,205,102
chr3L	11060520	11061272	1	1	+	11060520	11061272	0,255,127
chr3L	11061635	11061750	1	1	+	11061635	11061750	0,255,127
chr3L	11062356	11062517	1	228	+	11062356	11062517	16,78,139
chr3L	11062515	11062689	1	1	+	11062515	11062689	0,255,127
chr3L	11062626	11062797	1	282	+	11062626	11062797	16,78,139
chr3L	1106288	1106431	1	1	+	1106288	1106431	0,255,127
chr3L	11063155	11064214	2	2	+	11063155	11064214	0,205,102
chr3L	11064035	11064200	1	39	+	11064035	11064200	16,78,139
chr3L	11064179	11064359	1	7	+	11064179	11064359	0,205,102
chr3L	11064179	11064708	1	49	+	11064179	11064708	16,78,139
chr3L	11065394	11065665	2	2	+	11065394	11065665	0,255,127
chr3L	11065456	11065619	1	1	+	11065456	11065619	0,255,127
chr3L	11065460	11065599	1	4	+	11065460	11065599	16,78,139
chr3L	11065460	11065619	1	614	+	11065460	11065619	16,78,139
chr3L	11065460	11065711	1	17	+	11065460	11065711	16,78,139
chr3L	11065805	11065957	1	1	+	11065805	11065957	0,205,102
chr3L	11066483	11066753	1	2	+	11066483	11066753	0,205,102
chr3L	11066594	11516582	1	1	+	11066594	11516582	0,255,127
chr3L	11066602	11516589	1	1	+	11066602	11516589	0,255,127
chr3L	11066818	11067470	1	1	+	11066818	11067470	0,255,127
chr3L	11066973	11247773	1	1	+	11066973	11247773	0,205,102
chr3L	11067061	11067214	1	11	+	11067061	11067214	0,255,127
chr3L	11067061	11067228	1	1	+	11067061	11067228	0,205,102
chr3L	11067061	11067232	1	2	+	11067061	11067232	0,205,102
chr3L	11067061	11067265	10	862	+	11067061	11067265	16,78,139
chr3L	11067092	11067265	1	15	+	11067092	11067265	0,205,102
chr3L	11068103	11068300	1	1	+	11068103	11068300	0,255,127
chr3L	11068320	11068697	1	1	+	11068320	11068697	0,255,127
chr3L	11068639	11068804	1	143	+	11068639	11068804	16,78,139
chr3L	11068819	11068978	1	84	+	11068819	11068978	16,78,139
chr3L	11069444	11070541	1	1	+	11069444	11070541	0,255,127
chr3L	11070453	11070612	1	51	+	11070453	11070612	16,78,139
chr3L	11070808	11071184	1	1	+	11070808	11071184	0,255,127
chr3L	11070862	11071034	1	1	+	11070862	11071034	0,255,127
chr3L	11070941	11071191	1	2	+	11070941	11071191	0,255,127
chr3L	11071033	11071184	2	2	+	11071033	11071184	0,255,127
chr3L	11071033	11071748	1	1	+	11071033	11071748	0,255,127
chr3L	11071040	11071191	1	2	+	11071040	11071191	0,255,127
chr3L	11071054	11071331	1	1	+	11071054	11071331	0,255,127
chr3L	11071055	11071260	1	1	+	11071055	11071260	0,255,127
chr3L	11071070	11071188	1	1	+	11071070	11071188	0,205,102
chr3L	11071070	11071287	1	1	+	11071070	11071287	0,255,127
chr3L	11071081	11071271	1	5	+	11071081	11071271	0,255,127
chr3L	11071081	11071274	1	3	+	11071081	11071274	0,255,127
chr3L	11071081	11071277	1	1	+	11071081	11071277	0,255,127
chr3L	11071091	11071218	1	1	+	11071091	11071218	0,255,127
chr3L	11071100	11071236	1	1	+	11071100	11071236	0,255,127
chr3L	11071100	11071459	1	1	+	11071100	11071459	0,255,127
chr3L	11071118	11071386	2	2	+	11071118	11071386	0,255,127
chr3L	11071127	11071314	1	1	+	11071127	11071314	0,255,127
chr3L	11071170	11071569	1	2	+	11071170	11071569	0,255,127
chr3L	11071175	11071386	1	1	+	11071175	11071386	0,255,127
chr3L	11071178	11071386	1	3	+	11071178	11071386	0,255,127
chr3L	11071187	11071368	2	2	+	11071187	11071368	0,255,127
chr3L	11071190	11071362	1	1	+	11071190	11071362	0,255,127
chr3L	11071220	11071594	2	2	+	11071220	11071594	0,255,127
chr3L	11071235	11071399	2	2	+	11071235	11071399	0,255,127
chr3L	11071271	11071459	1	1	+	11071271	11071459	0,255,127
chr3L	11071286	11071609	1	1	+	11071286	11071609	0,255,127
chr3L	11071353	11071778	1	1	+	11071353	11071778	0,255,127
chr3L	11071376	11071547	1	1327	+	11071376	11071547	16,78,139
chr3L	11071553	11071719	1	1	+	11071553	11071719	0,255,127
chr3L	11071556	11181077	1	1	+	11071556	11181077	0,205,102
chr3L	11072265	11072380	1	1	+	11072265	11072380	0,255,127
chr3L	11072812	11073576	1	4	+	11072812	11073576	16,78,139
chr3L	11073539	11073667	1	1	+	11073539	11073667	0,255,127
chr3L	11075005	11075165	1	76	+	11075005	11075165	16,78,139
chr3L	11075514	11075675	1	654	+	11075514	11075675	16,78,139
chr3L	11076387	11076550	1	80	+	11076387	11076550	16,78,139
chr3L	11076526	11084072	1	1	+	11076526	11084072	0,255,127
chr3L	11076535	11076798	1	1	+	11076535	11076798	0,205,102
chr3L	11076535	11078562	1	3	+	11076535	11078562	0,205,102
chr3L	11076535	11078578	100	3100	+	11076535	11078578	16,78,139
chr3L	11078248	11078578	1	2	+	11078248	11078578	0,205,102
chr3L	11078612	11078780	2	5	+	11078612	11078780	0,205,102
chr3L	11078612	11078789	1	2620	+	11078612	11078789	16,78,139
chr3L	11078612	11078792	1	1	+	11078612	11078792	0,205,102
chr3L	11078758	11084047	1	250	+	11078758	11084047	16,78,139
chr3L	11084320	11084526	1	2	+	11084320	11084526	0,205,102
chr3L	11084320	11084542	1	8	+	11084320	11084542	0,205,102
chr3L	11084410	11490135	1	1	+	11084410	11490135	0,255,127
chr3L	11084822	11085421	1	560	+	11084822	11085421	16,78,139
chr3L	11084822	11085809	1	19	+	11084822	11085809	0,205,102
chr3L	11084822	11086319	1	1	+	11084822	11086319	0,205,102
chr3L	11085403	11085809	1	1	+	11085403	11085809	0,205,102
chr3L	11085430	11085673	1	1	+	11085430	11085673	0,255,127
chr3L	11085431	11085591	1	1	+	11085431	11085591	0,255,127
chr3L	11085436	11085680	1	2	+	11085436	11085680	0,255,127
chr3L	11085635	11085934	1	1	+	11085635	11085934	0,255,127
chr3L	11085642	11440948	1	1	+	11085642	11440948	0,255,127
chr3L	11085644	11085888	1	4	+	11085644	11085888	0,255,127
chr3L	11085645	11086140	1	14	+	11085645	11086140	0,255,127
chr3L	11085646	11086140	1	17	+	11085646	11086140	0,255,127
chr3L	11085685	11247821	1	1	+	11085685	11247821	0,255,127
chr3L	11085955	11086265	1	1	+	11085955	11086265	0,255,127
chr3L	11085955	11481418	1	1	+	11085955	11481418	0,255,127
chr3L	11086121	11086280	1	1	+	11086121	11086280	0,205,102
chr3L	11087189	11087344	1	30	+	11087189	11087344	16,78,139
chr3L	11089166	11090598	1	1	+	11089166	11090598	0,205,102
chr3L	11089779	11090038	1	1	+	11089779	11090038	0,255,127
chr3L	11089807	11089931	1	1	+	11089807	11089931	0,255,127
chr3L	11089817	11089944	2	2	+	11089817	11089944	0,255,127
chr3L	11089948	11091431	1	1	+	11089948	11091431	0,255,127
chr3L	11090034	11090180	1	1	+	11090034	11090180	0,255,127
chr3L	11090111	11091241	10	4684	+	11090111	11091241	16,78,139
chr3L	11090111	11091291	1	8	+	11090111	11091291	16,78,139
chr3L	11090111	11091324	1	4	+	11090111	11091324	0,205,102
chr3L	11090283	11090741	1	1	+	11090283	11090741	0,255,127
chr3L	11090922	11091149	10	431	+	11090922	11091149	16,78,139
chr3L	11091340	11091760	1	7	+	11091340	11091760	0,205,102
chr3L	11091340	11091763	1	14	+	11091340	11091763	16,78,139
chr3L	11091347	11091704	1	3	+	11091347	11091704	0,205,102
chr3L	11091347	11091760	1	11	+	11091347	11091760	16,78,139
chr3L	11091347	11091763	1	14	+	11091347	11091763	16,78,139
chr3L	11091466	11091614	1	1	+	11091466	11091614	0,255,127
chr3L	11091802	11091959	1	30	+	11091802	11091959	16,78,139
chr3L	11092024	11092180	1	298	+	11092024	11092180	16,78,139
chr3L	11092528	11092703	1	1	+	11092528	11092703	0,255,127
chr3L	11092603	11092736	1	1	+	11092603	11092736	0,255,127
chr3L	11092726	11092892	1	549	+	11092726	11092892	16,78,139
chr3L	11093126	11093288	10	502	+	11093126	11093288	16,78,139
chr3L	11093437	11093596	1	1308	+	11093437	11093596	16,78,139
chr3L	11093437	11093599	1	1	+	11093437	11093599	0,255,127
chr3L	11093633	11093865	1	2	+	11093633	11093865	0,205,102
chr3L	11096771	11096895	1	1	+	11096771	11096895	0,205,102
chr3L	11102120	11102293	1	1	+	11102120	11102293	16,78,139
chr3L	11102316	11102478	1	3	+	11102316	11102478	16,78,139
chr3L	11102316	11106723	1	1	+	11102316	11106723	0,205,102
chr3L	11102889	11103179	1	9	+	11102889	11103179	16,78,139
chr3L	11103454	11103654	1	136	+	11103454	11103654	16,78,139
chr3L	11103850	11104011	1	161	+	11103850	11104011	16,78,139
chr3L	11104169	11104337	1	320	+	11104169	11104337	16,78,139
chr3L	11104412	11104574	1	638	+	11104412	11104574	16,78,139
chr3L	11104738	11104894	102	3383	+	11104738	11104894	16,78,139
chr3L	11104838	11104968	1	1	+	11104838	11104968	0,205,102
chr3L	11105430	11105602	1	2	+	11105430	11105602	0,255,127
chr3L	11105438	11105599	1	1	+	11105438	11105599	0,255,127
chr3L	11105508	11105946	1	1	+	11105508	11105946	0,205,102
chr3L	11105508	11105977	1	2	+	11105508	11105977	0,205,102
chr3L	11105539	11105655	1	1	+	11105539	11105655	0,255,127
chr3L	11105539	11105958	1	1	+	11105539	11105958	0,255,127
chr3L	11105550	11105809	1	1	+	11105550	11105809	0,255,127
chr3L	11105683	11105906	1	3	+	11105683	11105906	0,255,127
chr3L	11105898	11106416	1	1	+	11105898	11106416	0,205,102
chr3L	11105898	11106723	1	832	+	11105898	11106723	16,78,139
chr3L	11107373	11500416	1	1	+	11107373	11500416	0,255,127
chr3L	11107375	11490862	1	1	+	11107375	11490862	0,255,127
chr3L	11107518	11107642	1	1	+	11107518	11107642	0,255,127
chr3L	11107524	11107652	1	1	+	11107524	11107652	0,255,127
chr3L	11107620	11247802	1	1	+	11107620	11247802	0,205,102
chr3L	11107769	11107928	1	2	+	11107769	11107928	0,255,127
chr3L	11107800	11107965	1	1	+	11107800	11107965	0,255,127
chr3L	11108050	11500416	1	1	+	11108050	11500416	0,255,127
chr3L	11108269	11108387	1	1	+	11108269	11108387	0,255,127
chr3L	11108445	11108669	1	1	+	11108445	11108669	0,255,127
chr3L	11108465	11108633	1	4	+	11108465	11108633	0,205,102
chr3L	11108468	11108633	1	177	+	11108468	11108633	16,78,139
chr3L	11108630	11108866	1	395	+	11108630	11108866	16,78,139
chr3L	11108858	11109035	1	1	+	11108858	11109035	0,255,127
chr3L	11108862	11109039	1	429	+	11108862	11109039	16,78,139
chr3L	11108862	11109078	1	1	+	11108862	11109078	0,205,102
chr3L	11109124	11109290	1	274	+	11109124	11109290	16,78,139
chr3L	1110935	1111078	1	1	+	1110935	1111078	0,255,127
chr3L	11109408	11109573	1	1	+	11109408	11109573	0,205,102
chr3L	11109408	11109577	1	51	+	11109408	11109577	0,205,102
chr3L	11109411	11109577	1	1306	+	11109411	11109577	16,78,139
chr3L	11109559	11110742	1	1	+	11109559	11110742	0,255,127
chr3L	11109575	11109815	1	1	+	11109575	11109815	0,205,102
chr3L	11109575	11109819	1	822	+	11109575	11109819	24116205
chr3L	11109575	11110454	1	1	+	11109575	11110454	0,205,102
chr3L	11109929	11110074	1	2	+	11109929	11110074	0,255,127
chr3L	11109947	11110110	1	1	+	11109947	11110110	0,255,127
chr3L	11109981	11110099	1	1	+	11109981	11110099	0,255,127
chr3L	11109987	11110105	1	1	+	11109987	11110105	0,255,127
chr3L	11109992	11110110	1	1	+	11109992	11110110	0,255,127
chr3L	11110219	11110454	1	126	+	11110219	11110454	16,78,139
chr3L	11110657	11111054	1	1	+	11110657	11111054	0,255,127
chr3L	11110657	11111084	2	2	+	11110657	11111084	0,255,127
chr3L	11110659	11111150	1	1	+	11110659	11111150	0,255,127
chr3L	11110663	11111117	1	1	+	11110663	11111117	0,255,127
chr3L	11110693	11111108	1	1	+	11110693	11111108	0,255,127
chr3L	11110696	11110936	1	1	+	11110696	11110936	0,205,102
chr3L	11110705	11535122	1	1	+	11110705	11535122	0,255,127
chr3L	11110712	11111000	1	2	+	11110712	11111000	0,255,127
chr3L	11110716	11111142	1	1	+	11110716	11111142	0,255,127
chr3L	11110737	11111068	1	1	+	11110737	11111068	0,255,127
chr3L	11110737	11111138	1	1	+	11110737	11111138	0,255,127
chr3L	11110742	11111091	1	6	+	11110742	11111091	0,255,127
chr3L	11110744	11111133	2	2	+	11110744	11111133	0,255,127
chr3L	11110746	11111065	1	1	+	11110746	11111065	0,255,127
chr3L	11110756	11111066	2	2	+	11110756	11111066	0,255,127
chr3L	11110761	11111038	3	3	+	11110761	11111038	0,255,127
chr3L	11110761	11111068	4	4	+	11110761	11111068	0,255,127
chr3L	11110761	11111138	1	1	+	11110761	11111138	0,255,127
chr3L	11110764	11111068	1	1	+	11110764	11111068	0,255,127
chr3L	11110770	11111038	1	1	+	11110770	11111038	0,255,127
chr3L	11110773	11111068	1	1	+	11110773	11111068	0,255,127
chr3L	11110782	11111068	1	2	+	11110782	11111068	0,255,127
chr3L	11110782	11321388	1	1	+	11110782	11321388	0,255,127
chr3L	11110785	11111068	1	1	+	11110785	11111068	0,255,127
chr3L	11110820	11111115	1	1	+	11110820	11111115	0,255,127
chr3L	11110938	11111068	1	2	+	11110938	11111068	0,255,127
chr3L	11110938	11111138	3	3	+	11110938	11111138	0,255,127
chr3L	11110941	11111068	1	2	+	11110941	11111068	0,255,127
chr3L	11110944	11111138	1	1	+	11110944	11111138	0,255,127
chr3L	11110953	11111068	2	2	+	11110953	11111068	0,255,127
chr3L	11110971	11111120	1	1	+	11110971	11111120	0,255,127
chr3L	11110974	11111120	2	2	+	11110974	11111120	0,255,127
chr3L	11110977	11111120	1	3	+	11110977	11111120	0,255,127
chr3L	11110983	11111150	1	1	+	11110983	11111150	0,255,127
chr3L	11110989	11111108	1	1	+	11110989	11111108	0,255,127
chr3L	11110989	11111117	1	1	+	11110989	11111117	0,255,127
chr3L	11110993	11500302	1	1	+	11110993	11500302	0,255,127
chr3L	11110997	11111115	1	1	+	11110997	11111115	0,255,127
chr3L	11111007	11111170	1	1	+	11111007	11111170	0,255,127
chr3L	11111017	11111138	1	1	+	11111017	11111138	0,255,127
chr3L	11111020	11111138	1	7	+	11111020	11111138	0,255,127
chr3L	11111020	11518171	1	1	+	11111020	11518171	0,205,102
chr3L	11111024	11111194	1	1	+	11111024	11111194	0,255,127
chr3L	11111027	11113431	2	2	+	11111027	11113431	0,205,102
chr3L	11111032	11189951	1	4	+	11111032	11189951	0,255,127
chr3L	11111035	11189951	1	2	+	11111035	11189951	0,255,127
chr3L	11111038	11111156	1	1	+	11111038	11111156	0,255,127
chr3L	11111038	11189952	1	1	+	11111038	11189952	0,255,127
chr3L	11111038	11282383	1	1	+	11111038	11282383	0,255,127
chr3L	11111038	11535058	1	1	+	11111038	11535058	0,255,127
chr3L	11111041	11189951	1	6	+	11111041	11189951	0,255,127
chr3L	11111044	11189951	1	2	+	11111044	11189951	0,255,127
chr3L	11111050	11518197	1	1	+	11111050	11518197	0,255,127
chr3L	11111056	11500310	1	1	+	11111056	11500310	0,255,127
chr3L	11111070	11113903	2	2	+	11111070	11113903	0,205,102
chr3L	11111101	11503635	1	1	+	11111101	11503635	0,255,127
chr3L	11111103	11189951	1	5	+	11111103	11189951	0,255,127
chr3L	11111103	11503635	1	6	+	11111103	11503635	0,255,127
chr3L	11111103	11503638	1	25	+	11111103	11503638	0,255,127
chr3L	11111106	11111555	1	1	+	11111106	11111555	0,255,127
chr3L	11111106	11111633	1	1	+	11111106	11111633	0,255,127
chr3L	11111106	11189951	1	8	+	11111106	11189951	0,255,127
chr3L	11111106	11288312	2	2	+	11111106	11288312	0,255,127
chr3L	11111106	11503635	1	51	+	11111106	11503635	0,255,127
chr3L	11111109	11189951	1	1	+	11111109	11189951	0,255,127
chr3L	11111115	11111312	1	2	+	11111115	11111312	0,205,102
chr3L	11111115	11111369	1	53	+	11111115	11111369	0,205,102
chr3L	11111115	11111506	1	15	+	11111115	11111506	0,205,102
chr3L	11111115	11111564	1	6538	+	11111115	11111564	16,78,139
chr3L	11111115	11111868	1	7	+	11111115	11111868	0,205,102
chr3L	11111115	11111948	1	1	+	11111115	11111948	0,255,127
chr3L	11111115	11111978	1	7	+	11111115	11111978	0,205,102
chr3L	11111115	11111982	1	11	+	11111115	11111982	0,205,102
chr3L	11111115	11111993	1	4	+	11111115	11111993	0,205,102
chr3L	11111115	11112314	1	93	+	11111115	11112314	16,78,139
chr3L	11111115	11112545	1	20	+	11111115	11112545	0,205,102
chr3L	11111115	11112754	1	17	+	11111115	11112754	0,205,102
chr3L	11111115	11112814	1	1	+	11111115	11112814	0,205,102
chr3L	11111115	11112991	1	1	+	11111115	11112991	0,205,102
chr3L	11111115	11113050	1	9	+	11111115	11113050	0,205,102
chr3L	11111115	11113054	1	43	+	11111115	11113054	0,205,102
chr3L	11111115	11113159	1	1	+	11111115	11113159	0,205,102
chr3L	11111115	11113235	1	4	+	11111115	11113235	0,205,102
chr3L	11111115	11113249	1	12	+	11111115	11113249	0,205,102
chr3L	11111115	11113261	1	27	+	11111115	11113261	0,205,102
chr3L	11111115	11113265	1	1	+	11111115	11113265	0,205,102
chr3L	11111115	11113390	1	4	+	11111115	11113390	0,205,102
chr3L	11111115	11113413	1	2	+	11111115	11113413	0,205,102
chr3L	11111115	11113415	1	1	+	11111115	11113415	0,205,102
chr3L	11111115	11113431	1	498	+	11111115	11113431	16,78,139
chr3L	11111115	11113506	1	99	+	11111115	11113506	0,205,102
chr3L	11111115	11113525	1	5	+	11111115	11113525	0,255,127
chr3L	11111115	11113557	1	106	+	11111115	11113557	0,205,102
chr3L	11111115	11113578	1	14	+	11111115	11113578	0,205,102
chr3L	11111115	11113759	1	4463	+	11111115	11113759	16,78,139
chr3L	11111115	11119646	1	1	+	11111115	11119646	0,205,102
chr3L	11111115	11555043	1	1	+	11111115	11555043	0,205,102
chr3L	11111117	11111296	1	1	+	11111117	11111296	0,255,127
chr3L	11111117	11111391	1	1	+	11111117	11111391	0,255,127
chr3L	11111217	11111645	1	2	+	11111217	11111645	0,255,127
chr3L	11111269	11111424	1	1	+	11111269	11111424	0,205,102
chr3L	11111269	11113578	1	1	+	11111269	11113578	0,205,102
chr3L	11111357	11111564	1	13	+	11111357	11111564	0,205,102
chr3L	11111357	11112754	1	1	+	11111357	11112754	0,205,102
chr3L	11111357	11113159	1	1	+	11111357	11113159	0,205,102
chr3L	11111357	11113390	1	1	+	11111357	11113390	0,205,102
chr3L	11111357	11113506	1	1	+	11111357	11113506	0,205,102
chr3L	11111371	11113431	1	1	+	11111371	11113431	0,255,127
chr3L	11111464	11113578	1	1	+	11111464	11113578	0,205,102
chr3L	11111471	11113557	1	1	+	11111471	11113557	0,205,102
chr3L	11111494	11503635	1	2	+	11111494	11503635	0,255,127
chr3L	11111522	11111644	1	4	+	11111522	11111644	0,255,127
chr3L	11111523	11111712	1	1	+	11111523	11111712	0,255,127
chr3L	11111556	11111738	1	3	+	11111556	11111738	0,205,102
chr3L	11111557	11111738	1	1	+	11111557	11111738	0,255,127
chr3L	11111580	11113062	1	1	+	11111580	11113062	0,205,102
chr3L	11111580	11113261	1	1	+	11111580	11113261	0,205,102
chr3L	11111580	11113265	1	1	+	11111580	11113265	0,205,102
chr3L	11111580	11113314	1	1	+	11111580	11113314	0,205,102
chr3L	11111580	11113431	1	1	+	11111580	11113431	0,205,102
chr3L	11111580	11113506	1	7	+	11111580	11113506	0,205,102
chr3L	11111580	11113557	1	3	+	11111580	11113557	0,205,102
chr3L	11111590	11112314	1	2	+	11111590	11112314	0,205,102
chr3L	11111590	11112754	1	1	+	11111590	11112754	0,205,102
chr3L	11111590	11113050	1	3	+	11111590	11113050	0,205,102
chr3L	11111590	11113054	1	17	+	11111590	11113054	0,205,102
chr3L	11111590	11113062	1	1	+	11111590	11113062	0,205,102
chr3L	11111590	11113249	1	1	+	11111590	11113249	0,205,102
chr3L	11111590	11113261	1	7	+	11111590	11113261	0,205,102
chr3L	11111590	11113265	1	2	+	11111590	11113265	0,205,102
chr3L	11111590	11113372	1	1	+	11111590	11113372	0,255,127
chr3L	11111590	11113390	1	1	+	11111590	11113390	0,205,102
chr3L	11111590	11113431	1	18	+	11111590	11113431	0,205,102
chr3L	11111590	11113506	1	33	+	11111590	11113506	0,205,102
chr3L	11111590	11113525	1	1	+	11111590	11113525	0,255,127
chr3L	11111590	11113557	1	26	+	11111590	11113557	0,205,102
chr3L	11111593	11112314	1	1	+	11111593	11112314	0,205,102
chr3L	11111593	11112991	2	2	+	11111593	11112991	0,205,102
chr3L	11111593	11113050	1	6	+	11111593	11113050	0,205,102
chr3L	11111593	11113054	1	5	+	11111593	11113054	0,205,102
chr3L	11111593	11113124	1	1	+	11111593	11113124	0,205,102
chr3L	11111593	11113235	2	2	+	11111593	11113235	0,205,102
chr3L	11111593	11113261	3	3	+	11111593	11113261	0,205,102
chr3L	11111593	11113314	1	3	+	11111593	11113314	0,205,102
chr3L	11111593	11113431	1	15	+	11111593	11113431	0,205,102
chr3L	11111593	11113506	1	19	+	11111593	11113506	0,205,102
chr3L	11111593	11113557	1	14	+	11111593	11113557	0,205,102
chr3L	11111593	11113578	1	5	+	11111593	11113578	0,205,102
chr3L	11111624	11111974	1	3	+	11111624	11111974	0,255,127
chr3L	11111624	11247815	1	1	+	11111624	11247815	0,255,127
chr3L	11111643	11113131	1	1	+	11111643	11113131	0,255,127
chr3L	11111647	11113116	1	1	+	11111647	11113116	0,255,127
chr3L	11111647	11113431	1	1	+	11111647	11113431	0,255,127
chr3L	11111653	11247799	1	1	+	11111653	11247799	0,255,127
chr3L	11111665	11113557	1	1	+	11111665	11113557	0,205,102
chr3L	11111695	11113314	1	1	+	11111695	11113314	0,205,102
chr3L	11111707	11501851	1	1	+	11111707	11501851	0,255,127
chr3L	11111710	11111968	1	1	+	11111710	11111968	0,255,127
chr3L	11111710	11111974	1	1	+	11111710	11111974	0,255,127
chr3L	11112253	11113431	1	1	+	11112253	11113431	0,205,102
chr3L	11112261	11112443	1	3	+	11112261	11112443	0,205,102
chr3L	11112261	11112545	1	1	+	11112261	11112545	0,205,102
chr3L	11112261	11112754	1	12	+	11112261	11112754	0,205,102
chr3L	11112261	11112781	1	4	+	11112261	11112781	0,205,102
chr3L	11112261	11112818	1	5	+	11112261	11112818	0,205,102
chr3L	11112261	11113506	1	1	+	11112261	11113506	0,205,102
chr3L	11112261	11113525	1	1	+	11112261	11113525	0,255,127
chr3L	11112261	11113557	1	1	+	11112261	11113557	0,205,102
chr3L	11112261	11113578	1	4	+	11112261	11113578	0,205,102
chr3L	11112353	11113506	1	1	+	11112353	11113506	0,205,102
chr3L	11112413	11112754	1	4	+	11112413	11112754	0,205,102
chr3L	11112445	11112754	1	1	+	11112445	11112754	0,205,102
chr3L	11112589	11112818	1	6	+	11112589	11112818	0,205,102
chr3L	11112589	11113506	1	2	+	11112589	11113506	0,205,102
chr3L	11112625	11112781	1	1	+	11112625	11112781	0,205,102
chr3L	11112702	11112835	1	1	+	11112702	11112835	0,255,127
chr3L	11112743	11113138	1	1	+	11112743	11113138	0,255,127
chr3L	11112883	11113046	1	1	+	11112883	11113046	0,255,127
chr3L	11112906	11113131	1	1	+	11112906	11113131	0,255,127
chr3L	11112922	11113043	1	1	+	11112922	11113043	0,255,127
chr3L	11112966	11113261	2	2	+	11112966	11113261	0,205,102
chr3L	11112966	11113506	1	1	+	11112966	11113506	0,205,102
chr3L	11113722	11113903	2	2	+	11113722	11113903	0,205,102
chr3L	11113749	11116871	1	1	+	11113749	11116871	0,255,127
chr3L	11113804	11114340	1	1	+	11113804	11114340	0,255,127
chr3L	11114251	11114795	1	1	+	11114251	11114795	0,255,127
chr3L	11114456	11114712	1	59	+	11114456	11114712	16,78,139
chr3L	11114598	11115113	1	1	+	11114598	11115113	0,205,102
chr3L	11114736	11114908	1	1	+	11114736	11114908	0,255,127
chr3L	11115728	11115909	1	1	+	11115728	11115909	0,255,127
chr3L	11115914	11116071	1	174	+	11115914	11116071	16,78,139
chr3L	11116460	11116624	1	5	+	11116460	11116624	0,205,102
chr3L	11116516	11116680	1	2	+	11116516	11116680	0,205,102
chr3L	11116516	11118878	1	2	+	11116516	11118878	0,205,102
chr3L	11116516	11119067	2	2	+	11116516	11119067	0,205,102
chr3L	11116516	11121841	1	1593	+	11116516	11121841	16,78,139
chr3L	11116644	11516582	2	2	+	11116644	11516582	0,255,127
chr3L	11116653	11116792	1	1	+	11116653	11116792	0,255,127
chr3L	11116688	11121841	2	2	+	11116688	11121841	0,255,127
chr3L	11116706	11121841	1	9	+	11116706	11121841	0,205,102
chr3L	11116710	11121841	1	1	+	11116710	11121841	0,205,102
chr3L	11116715	11121841	1	1	+	11116715	11121841	0,255,127
chr3L	11116726	11117768	1	8	+	11116726	11117768	0,205,102
chr3L	11116726	11117838	1	1	+	11116726	11117838	0,205,102
chr3L	11116726	11118878	1	6	+	11116726	11118878	0,205,102
chr3L	11116726	11121339	2	2	+	11116726	11121339	0,205,102
chr3L	11116726	11121470	1	1	+	11116726	11121470	0,255,127
chr3L	11116726	11121472	1	3	+	11116726	11121472	0,205,102
chr3L	11116726	11121841	1	485	+	11116726	11121841	0,205,102
chr3L	11116728	11117768	1	1	+	11116728	11117768	0,205,102
chr3L	11116728	11121472	2	2	+	11116728	11121472	0,205,102
chr3L	11116728	11121841	1	50	+	11116728	11121841	0,205,102
chr3L	11116728	11122078	1	1	+	11116728	11122078	0,205,102
chr3L	11116730	11117768	3	3	+	11116730	11117768	0,205,102
chr3L	11116730	11118149	1	3	+	11116730	11118149	0,205,102
chr3L	11116730	11118878	1	13	+	11116730	11118878	0,205,102
chr3L	11116730	11121427	1	1	+	11116730	11121427	0,205,102
chr3L	11116730	11121472	1	2	+	11116730	11121472	0,205,102
chr3L	11116730	11121841	1	184	+	11116730	11121841	0,205,102
chr3L	11116816	11121841	1	6	+	11116816	11121841	0,205,102
chr3L	11116854	11121841	1	1	+	11116854	11121841	0,205,102
chr3L	11116858	11121841	1	1	+	11116858	11121841	0,205,102
chr3L	11116917	11121841	1	1	+	11116917	11121841	0,205,102
chr3L	11116957	11121841	2	2	+	11116957	11121841	0,205,102
chr3L	11116973	11121283	1	1	+	11116973	11121283	0,205,102
chr3L	11116973	11121841	1	3	+	11116973	11121841	0,205,102
chr3L	11117800	11121841	1	42	+	11117800	11121841	0,205,102
chr3L	11117872	11118152	1	1	+	11117872	11118152	0,255,127
chr3L	11118084	11118223	1	1	+	11118084	11118223	0,255,127
chr3L	11118191	11118878	1	9	+	11118191	11118878	0,205,102
chr3L	11118191	11121841	1	1	+	11118191	11121841	0,205,102
chr3L	11118341	11121841	1	9	+	11118341	11121841	0,205,102
chr3L	11118671	11118793	1	1	+	11118671	11118793	0,255,127
chr3L	11118920	11121841	1	54	+	11118920	11121841	0,205,102
chr3L	11119107	11121841	1	5	+	11119107	11121841	0,205,102
chr3L	11119770	11121841	1	4	+	11119770	11121841	0,205,102
chr3L	11119916	11121841	1	14	+	11119916	11121841	0,205,102
chr3L	11119945	11121841	1	109	+	11119945	11121841	0,205,102
chr3L	11120292	11120418	1	1	+	11120292	11120418	0,255,127
chr3L	11121027	11121177	1	62	+	11121027	11121177	0,255,127
chr3L	11121031	11121841	1	1	+	11121031	11121841	0,205,102
chr3L	11121112	11121841	1	3	+	11121112	11121841	0,205,102
chr3L	11121398	11121562	1	19	+	11121398	11121562	0,205,102
chr3L	11121497	11121841	1	1	+	11121497	11121841	0,205,102
chr3L	11121515	11121841	1	84	+	11121515	11121841	0,205,102
chr3L	11121552	11121841	1	5	+	11121552	11121841	0,205,102
chr3L	11121653	11121841	2	2	+	11121653	11121841	0,205,102
chr3L	11121704	11121841	1	1	+	11121704	11121841	0,255,127
chr3L	11121706	11121916	1	1	+	11121706	11121916	0,255,127
chr3L	11121789	11122078	1	1	+	11121789	11122078	0,205,102
chr3L	11121794	11121961	1	3658	+	11121794	11121961	16,78,139
chr3L	11121794	11122078	1	1	+	11121794	11122078	0,205,102
chr3L	11122159	11122323	1	1	+	11122159	11122323	0,255,127
chr3L	11122249	11122389	1	3	+	11122249	11122389	0,255,127
chr3L	11122562	11489963	1	1	+	11122562	11489963	0,255,127
chr3L	11122693	11126981	1	1	+	11122693	11126981	0,255,127
chr3L	11122871	11126711	1	1	+	11122871	11126711	0,255,127
chr3L	11122930	11123102	10	380	+	11122930	11123102	16,78,139
chr3L	11122930	11127029	1	1	+	11122930	11127029	0,255,127
chr3L	11123599	11125228	1	1	+	11123599	11125228	0,205,102
chr3L	11123599	11125797	1	367	+	11123599	11125797	16,78,139
chr3L	11123998	11124146	1	1	+	11123998	11124146	0,205,102
chr3L	11126074	11126244	106	2778	+	11126074	11126244	16,78,139
chr3L	11126163	11126716	2	4	+	11126163	11126716	0,255,127
chr3L	11126243	11126592	1	1	+	11126243	11126592	0,255,127
chr3L	11126448	11126716	1	1	+	11126448	11126716	0,255,127
chr3L	11126456	11126622	1	1	+	11126456	11126622	0,205,102
chr3L	11126456	11127104	1	2	+	11126456	11127104	0,255,127
chr3L	11126539	11126846	1	2	+	11126539	11126846	0,255,127
chr3L	11126581	11126928	1	1	+	11126581	11126928	0,255,127
chr3L	11126612	11126868	1	1	+	11126612	11126868	0,255,127
chr3L	11126647	11126816	105	2400	+	11126647	11126816	16,78,139
chr3L	11126647	11126833	1	4	+	11126647	11126833	0,205,102
chr3L	11126819	11517792	1	1	+	11126819	11517792	0,255,127
chr3L	11126823	11518251	1	1	+	11126823	11518251	0,255,127
chr3L	11126939	11127073	2	2	+	11126939	11127073	0,255,127
chr3L	11126939	11127095	1	3	+	11126939	11127095	0,255,127
chr3L	11126946	11127101	2	2	+	11126946	11127101	0,255,127
chr3L	11127063	11127534	1	1	+	11127063	11127534	0,255,127
chr3L	11127078	11127517	1	2	+	11127078	11127517	0,255,127
chr3L	11127114	11127235	1	1	+	11127114	11127235	0,255,127
chr3L	11127440	11127811	1	1	+	11127440	11127811	0,255,127
chr3L	11127502	11492315	1	1	+	11127502	11492315	0,255,127
chr3L	11127721	11129247	1	1	+	11127721	11129247	0,255,127
chr3L	11127721	11492230	1	1	+	11127721	11492230	0,255,127
chr3L	11128876	11129008	1	2	+	11128876	11129008	0,255,127
chr3L	11129338	11130237	1	4	+	11129338	11130237	0,205,102
chr3L	11129338	11135389	1	1	+	11129338	11135389	0,205,102
chr3L	11129338	11135603	1	6	+	11129338	11135603	0,205,102
chr3L	11129338	11144022	1	275	+	11129338	11144022	16,78,139
chr3L	11129338	11151288	1	2	+	11129338	11151288	16,78,139
chr3L	11130324	11144022	2	2	+	11130324	11144022	0,205,102
chr3L	11137011	11137127	1	1	+	11137011	11137127	0,255,127
chr3L	11139793	11139946	1	1	+	11139793	11139946	0,255,127
chr3L	1114188	1370517	1	1	+	1114188	1370517	0,255,127
chr3L	11143129	11143285	1	15	+	11143129	11143285	16,78,139
chr3L	11143720	11143899	2	2	+	11143720	11143899	16,78,139
chr3L	11144174	11152399	1	1	+	11144174	11152399	0,205,102
chr3L	11144607	11150943	2	2	+	11144607	11150943	0,205,102
chr3L	11144607	11151288	1	404	+	11144607	11151288	16,78,139
chr3L	11148554	11148672	1	34	+	11148554	11148672	0,255,127
chr3L	11151264	11151491	1	277	+	11151264	11151491	16,78,139
chr3L	11151475	11151654	1	296	+	11151475	11151654	16,78,139
chr3L	11151507	11151654	1	1	+	11151507	11151654	0,205,102
chr3L	11151616	11151778	1	760	+	11151616	11151778	16,78,139
chr3L	11151749	11257953	1	1	+	11151749	11257953	0,255,127
chr3L	11151876	11152069	1	643	+	11151876	11152069	16,78,139
chr3L	11151876	11152446	1	6	+	11151876	11152446	0,205,102
chr3L	11152035	11152185	1	1	+	11152035	11152185	0,255,127
chr3L	11152035	11152446	1	843	+	11152035	11152446	16,78,139
chr3L	11152035	11152458	1	1	+	11152035	11152458	0,205,102
chr3L	11152613	11152908	1	102	+	11152613	11152908	16,78,139
chr3L	11153031	11153196	1	7	+	11153031	11153196	16,78,139
chr3L	11153776	11153930	1	73	+	11153776	11153930	16,78,139
chr3L	11153982	11154457	2	2	+	11153982	11154457	0,255,127
chr3L	11153982	11154479	1	1	+	11153982	11154479	0,255,127
chr3L	11153982	11154621	1	10	+	11153982	11154621	16,78,139
chr3L	11153982	11156533	1	21	+	11153982	11156533	16,78,139
chr3L	11153982	11156536	1	7	+	11153982	11156536	0,205,102
chr3L	11153982	11156704	1	55	+	11153982	11156704	0,205,102
chr3L	11156156	11156666	1	1	+	11156156	11156666	0,255,127
chr3L	11156498	11156908	1	1	+	11156498	11156908	0,205,102
chr3L	11156538	11156704	1	49	+	11156538	11156704	0,205,102
chr3L	11156589	11156908	1	1	+	11156589	11156908	0,255,127
chr3L	11156668	11156908	1	1	+	11156668	11156908	0,255,127
chr3L	11156726	11156893	1	1	+	11156726	11156893	0,255,127
chr3L	11157491	11157758	1	1	+	11157491	11157758	0,205,102
chr3L	11157506	11157758	1	1	+	11157506	11157758	0,255,127
chr3L	11158278	11158435	1	58	+	11158278	11158435	16,78,139
chr3L	11158572	11158689	1	1	+	11158572	11158689	0,205,102
chr3L	11158806	11158970	1	107	+	11158806	11158970	16,78,139
chr3L	11159831	11159980	1	1	+	11159831	11159980	0,255,127
chr3L	11160658	11160968	1	39	+	11160658	11160968	16,78,139
chr3L	11160658	11161286	10	614	+	11160658	11161286	16,78,139
chr3L	11160964	11161286	1	27	+	11160964	11161286	16,78,139
chr3L	11163199	11163359	1	13	+	11163199	11163359	16,78,139
chr3L	11164096	11164279	1	38	+	11164096	11164279	16,78,139
chr3L	11164345	11164511	1	21	+	11164345	11164511	16,78,139
chr3L	11164758	11164924	1	114	+	11164758	11164924	16,78,139
chr3L	11166959	11167129	1	19	+	11166959	11167129	16,78,139
chr3L	11167198	11167695	1	91	+	11167198	11167695	16,78,139
chr3L	11167234	11171579	1	1	+	11167234	11171579	0,205,102
chr3L	11167661	11167835	1	1	+	11167661	11167835	16,78,139
chr3L	11167806	11168021	1	1	+	11167806	11168021	16,78,139
chr3L	11168075	11168237	1	7	+	11168075	11168237	16,78,139
chr3L	11168209	11168445	1	7	+	11168209	11168445	16,78,139
chr3L	11168712	11168845	1	1	+	11168712	11168845	0,255,127
chr3L	11170047	11170168	1	1	+	11170047	11170168	0,255,127
chr3L	11170255	11170835	1	1	+	11170255	11170835	0,255,127
chr3L	11170279	11171381	1	2	+	11170279	11171381	0,255,127
chr3L	11170328	11170500	1	6	+	11170328	11170500	0,255,127
chr3L	11170664	11492631	1	1	+	11170664	11492631	0,255,127
chr3L	11170782	11170923	1	1	+	11170782	11170923	0,255,127
chr3L	11170917	11171056	1	1	+	11170917	11171056	0,205,102
chr3L	11171581	11171797	10	1103	+	11171581	11171797	16,78,139
chr3L	11171988	11172373	1	107	+	11171988	11172373	16,78,139
chr3L	11172431	11172679	1	65	+	11172431	11172679	16,78,139
chr3L	11172766	11172926	1	3	+	11172766	11172926	0,205,102
chr3L	11172766	11175304	1	128	+	11172766	11175304	16,78,139
chr3L	11172766	11176783	1	186	+	11172766	11176783	16,78,139
chr3L	11172897	11173060	1	1	+	11172897	11173060	0,255,127
chr3L	11173027	11173181	1	1	+	11173027	11173181	0,255,127
chr3L	11173726	11173881	1	12	+	11173726	11173881	0,255,127
chr3L	11175322	11175470	1	1	+	11175322	11175470	0,255,127
chr3L	11175376	11175683	1	1	+	11175376	11175683	0,255,127
chr3L	11175382	11175641	1	1	+	11175382	11175641	0,255,127
chr3L	11175541	11175698	1	1	+	11175541	11175698	0,255,127
chr3L	11175542	11175687	2	2	+	11175542	11175687	0,255,127
chr3L	11175550	11175683	1	1	+	11175550	11175683	0,255,127
chr3L	11175550	11175698	1	1	+	11175550	11175698	0,255,127
chr3L	11175557	11175672	1	1	+	11175557	11175672	0,255,127
chr3L	11175557	11175710	1	1	+	11175557	11175710	0,255,127
chr3L	11175571	11175696	1	1	+	11175571	11175696	0,255,127
chr3L	11175580	11175698	1	1	+	11175580	11175698	0,255,127
chr3L	11175583	11175698	2	2	+	11175583	11175698	0,255,127
chr3L	11175583	11517780	1	1	+	11175583	11517780	0,255,127
chr3L	11175590	11535874	1	2	+	11175590	11535874	0,255,127
chr3L	11175631	11176880	1	1	+	11175631	11176880	0,255,127
chr3L	11175687	11176783	1	19	+	11175687	11176783	0,205,102
chr3L	11175693	11176332	1	11	+	11175693	11176332	0,205,102
chr3L	11175693	11176783	1	1675	+	11175693	11176783	16,78,139
chr3L	11175911	11176076	1	1	+	11175911	11176076	0,255,127
chr3L	11176325	11176783	1	7	+	11176325	11176783	0,205,102
chr3L	11176328	11176783	1	2	+	11176328	11176783	0,205,102
chr3L	11177237	11177538	1	1	+	11177237	11177538	0,205,102
chr3L	11177255	11177714	1	1	+	11177255	11177714	0,255,127
chr3L	11177258	11177538	1	2543	+	11177258	11177538	16,78,139
chr3L	11177280	11177538	2	2	+	11177280	11177538	0,255,127
chr3L	11177326	11177538	1	1	+	11177326	11177538	0,255,127
chr3L	11177329	11177538	1	6	+	11177329	11177538	0,205,102
chr3L	11177360	11177538	1	8	+	11177360	11177538	0,205,102
chr3L	11177391	11177538	1	1	+	11177391	11177538	0,255,127
chr3L	11177469	11178327	1	12	+	11177469	11178327	0,205,102
chr3L	11177469	11178384	1	5	+	11177469	11178384	0,205,102
chr3L	11177469	11180687	1	1	+	11177469	11180687	0,205,102
chr3L	11177469	11184399	1	6	+	11177469	11184399	0,205,102
chr3L	11177469	11189716	1	2829	+	11177469	11189716	16,78,139
chr3L	11177469	11195364	1	1	+	11177469	11195364	0,205,102
chr3L	11178371	11189716	1	15	+	11178371	11189716	0,205,102
chr3L	11184439	11189716	1	5	+	11184439	11189716	0,205,102
chr3L	11184559	11189716	1	5	+	11184559	11189716	0,205,102
chr3L	111852	243381	2	2	+	111852	243381	0,205,102
chr3L	11185806	11189716	1	11	+	11185806	11189716	0,205,102
chr3L	11189778	11190284	1	1	+	11189778	11190284	0,205,102
chr3L	11189778	11190302	1	1	+	11189778	11190302	0,205,102
chr3L	11189778	11190549	1	1	+	11189778	11190549	16,78,139
chr3L	11189829	11190549	1	1	+	11189829	11190549	0,205,102
chr3L	11189840	11190304	2	4	+	11189840	11190304	0,205,102
chr3L	11189840	11190388	1	4	+	11189840	11190388	0,205,102
chr3L	11189840	11190549	1	1	+	11189840	11190549	0,205,102
chr3L	11189907	11190039	1	1	+	11189907	11190039	0,205,102
chr3L	11189925	11190278	1	2	+	11189925	11190278	0,205,102
chr3L	11189925	11190284	1	16	+	11189925	11190284	0,205,102
chr3L	11189925	11190286	1	1	+	11189925	11190286	0,205,102
chr3L	11189925	11190288	1	1	+	11189925	11190288	0,205,102
chr3L	11189925	11190298	1	19	+	11189925	11190298	0,205,102
chr3L	11189925	11190302	1	14	+	11189925	11190302	0,205,102
chr3L	11189925	11190304	1	27	+	11189925	11190304	0,205,102
chr3L	11189925	11190340	1	4	+	11189925	11190340	0,205,102
chr3L	11189925	11190388	1	158	+	11189925	11190388	16,78,139
chr3L	11189925	11190440	1	10	+	11189925	11190440	0,205,102
chr3L	11189925	11190454	1	5	+	11189925	11190454	0,205,102
chr3L	11189925	11190549	1	22	+	11189925	11190549	16,78,139
chr3L	11189925	11190650	1	23	+	11189925	11190650	16,78,139
chr3L	11189925	11190654	1	12	+	11189925	11190654	16,78,139
chr3L	11189953	11190079	1	1	+	11189953	11190079	0,255,127
chr3L	11189971	11190089	1	1	+	11189971	11190089	0,255,127
chr3L	11190160	11190417	1	1	+	11190160	11190417	0,255,127
chr3L	11190388	11190549	1	1	+	11190388	11190549	0,205,102
chr3L	11191347	11191594	1	3	+	11191347	11191594	0,255,127
chr3L	11191408	11192218	1	1	+	11191408	11192218	0,255,127
chr3L	11191760	11191919	10	1089	+	11191760	11191919	16,78,139
chr3L	11191849	11192006	1	1	+	11191849	11192006	0,205,102
chr3L	11192118	11192287	1	2	+	11192118	11192287	0,205,102
chr3L	11192254	11192415	1	238	+	11192254	11192415	16,78,139
chr3L	11192442	11193535	1	3	+	11192442	11193535	0,205,102
chr3L	11192442	11195364	1	426	+	11192442	11195364	16,78,139
chr3L	11192817	11192974	11	2073	+	11192817	11192974	16,78,139
chr3L	11192817	11192978	1	1	+	11192817	11192978	0,205,102
chr3L	11192941	11193188	1	1	+	11192941	11193188	0,255,127
chr3L	11192954	11193148	1	1	+	11192954	11193148	0,255,127
chr3L	11192978	11193131	10	5446	+	11192978	11193131	16,78,139
chr3L	11192978	11193140	1	3	+	11192978	11193140	0,205,102
chr3L	11193040	11193188	1	1	+	11193040	11193188	0,255,127
chr3L	11193113	11193280	1033	15645	+	11193113	11193280	16,78,139
chr3L	11193113	11193402	1	2	+	11193113	11193402	0,205,102
chr3L	11193119	11193280	1	3	+	11193119	11193280	0,205,102
chr3L	11193242	11193396	1	9	+	11193242	11193396	0,255,127
chr3L	11193245	11193400	2	4	+	11193245	11193400	0,255,127
chr3L	11193248	11193402	1032	19059	+	11193248	11193402	16,78,139
chr3L	11193248	11193421	1	27	+	11193248	11193421	0,205,102
chr3L	11193248	11193424	1	1	+	11193248	11193424	0,205,102
chr3L	11193252	11193406	1	13	+	11193252	11193406	0,205,102
chr3L	11193374	11193547	1	4	+	11193374	11193547	0,255,127
chr3L	11193378	11193547	105	10886	+	11193378	11193547	16,78,139
chr3L	11194447	11546335	1	1	+	11194447	11546335	0,255,127
chr3L	11194626	11194971	1	1	+	11194626	11194971	0,255,127
chr3L	11194692	11194845	1	1123	+	11194692	11194845	16,78,139
chr3L	11195123	11195364	1	3	+	11195123	11195364	0,205,102
chr3L	11195390	11195549	1	320	+	11195390	11195549	16,78,139
chr3L	11195551	11195771	1	54	+	11195551	11195771	16,78,139
chr3L	11195620	11195773	1	2	+	11195620	11195773	0,205,102
chr3L	11195912	11196072	1	1	+	11195912	11196072	0,205,102
chr3L	11195925	11196092	1	357	+	11195925	11196092	16,78,139
chr3L	11196524	11196682	1	498	+	11196524	11196682	16,78,139
chr3L	11196722	11198054	1	442	+	11196722	11198054	16,78,139
chr3L	1119716	1119884	2	2	+	1119716	1119884	0,255,127
chr3L	11198040	11198883	1	843	+	11198040	11198883	16,78,139
chr3L	11198919	11199105	1	7	+	11198919	11199105	16,78,139
chr3L	1119930	1120069	1	5	+	1119930	1120069	0,205,102
chr3L	1119969	1120108	1	1	+	1119969	1120108	0,205,102
chr3L	11199891	11200012	1	1	+	11199891	11200012	0,255,127
chr3L	11200128	11200614	1	1	+	11200128	11200614	0,205,102
chr3L	11200185	11200347	1	178	+	11200185	11200347	16,78,139
chr3L	11200740	11200906	10	736	+	11200740	11200906	16,78,139
chr3L	11200985	11201152	1	1	+	11200985	11201152	0,255,127
chr3L	11200988	11201154	1	284	+	11200988	11201154	16,78,139
chr3L	11201017	11201154	1	1	+	11201017	11201154	0,205,102
chr3L	11201609	11201774	1	38	+	11201609	11201774	16,78,139
chr3L	11201916	11202078	1	246	+	11201916	11202078	16,78,139
chr3L	11202054	11202677	2	2	+	11202054	11202677	0,205,102
chr3L	11202781	11202985	1	100	+	11202781	11202985	16,78,139
chr3L	11202817	11202985	1	3	+	11202817	11202985	0,205,102
chr3L	11203140	11203303	1	86	+	11203140	11203303	16,78,139
chr3L	11205441	11205731	1	1	+	11205441	11205731	0,205,102
chr3L	11205441	11205755	1	1	+	11205441	11205755	0,205,102
chr3L	11205811	11205968	1	884	+	11205811	11205968	16,78,139
chr3L	11206533	11206860	1	1	+	11206533	11206860	0,255,127
chr3L	11206683	11206959	1	1	+	11206683	11206959	0,255,127
chr3L	11207043	11500397	1	1	+	11207043	11500397	0,255,127
chr3L	11207624	11208916	1	1	+	11207624	11208916	0,205,102
chr3L	11207624	11209735	1	21	+	11207624	11209735	16,78,139
chr3L	11207624	11209777	1	3	+	11207624	11209777	0,205,102
chr3L	11207624	11209785	1	1	+	11207624	11209785	0,205,102
chr3L	11207815	11209735	1	1	+	11207815	11209735	0,205,102
chr3L	11208013	11208916	1	1	+	11208013	11208916	0,255,127
chr3L	11208860	11209735	1	20	+	11208860	11209735	16,78,139
chr3L	11208860	11209777	1	1	+	11208860	11209777	0,205,102
chr3L	11208864	11209735	1	4	+	11208864	11209735	16,78,139
chr3L	11208931	11209735	1	1	+	11208931	11209735	0,205,102
chr3L	11208981	11209735	1	1	+	11208981	11209735	0,205,102
chr3L	11209001	11209735	1	42	+	11209001	11209735	0,255,127
chr3L	11209005	11209735	1	2	+	11209005	11209735	0,205,102
chr3L	11209037	11209735	1	29	+	11209037	11209735	0,205,102
chr3L	11209041	11209735	1	15	+	11209041	11209735	0,205,102
chr3L	11209041	11209785	1	1	+	11209041	11209785	0,205,102
chr3L	11209045	11209182	2	2	+	11209045	11209182	0,255,127
chr3L	11209047	11209182	1	1	+	11209047	11209182	0,255,127
chr3L	11209070	11507093	2	2	+	11209070	11507093	0,255,127
chr3L	11209074	11209735	1	3	+	11209074	11209735	0,205,102
chr3L	11209078	11209735	1	1	+	11209078	11209735	0,205,102
chr3L	11209117	11209353	1	1	+	11209117	11209353	0,255,127
chr3L	11209233	11209805	2	2	+	11209233	11209805	0,255,127
chr3L	11209461	11209735	1	5	+	11209461	11209735	0,205,102
chr3L	11209720	11209879	1	1	+	11209720	11209879	0,205,102
chr3L	11209720	11209884	1	4	+	11209720	11209884	0,205,102
chr3L	11209720	11209887	1	10	+	11209720	11209887	0,205,102
chr3L	11209938	11210068	1	1	+	11209938	11210068	0,255,127
chr3L	11209968	11215850	2	2	+	11209968	11215850	0,255,127
chr3L	11210332	11215764	1	19	+	11210332	11215764	0,205,102
chr3L	11210332	11215767	1	58	+	11210332	11215767	16,78,139
chr3L	11216615	11216853	1	220	+	11216615	11216853	16,78,139
chr3L	11217247	11218220	2	2	+	11217247	11218220	0,255,127
chr3L	11217274	11218142	1	14	+	11217274	11218142	16,78,139
chr3L	11219618	11219785	101	2211	+	11219618	11219785	16,78,139
chr3L	11219792	11220102	2	2	+	11219792	11220102	0,255,127
chr3L	11219851	11220172	1	335	+	11219851	11220172	0,205,102
chr3L	11219851	11220195	1	1	+	11219851	11220195	0,205,102
chr3L	11219851	11220450	1	2	+	11219851	11220450	0,255,127
chr3L	11219851	11220463	1	86	+	11219851	11220463	0,205,102
chr3L	11219851	11220822	100	4760	+	11219851	11220822	16,78,139
chr3L	11219851	11222246	1	1	+	11219851	11222246	0,205,102
chr3L	11219851	11222262	1	244	+	11219851	11222262	0,205,102
chr3L	11219974	11220537	1	1	+	11219974	11220537	0,255,127
chr3L	11220109	11220463	1	4	+	11220109	11220463	0,205,102
chr3L	11220109	11220822	1	28	+	11220109	11220822	0,205,102
chr3L	11220109	11222262	1	151	+	11220109	11222262	0,205,102
chr3L	11220394	11222262	1	7	+	11220394	11222262	0,205,102
chr3L	11220400	11220822	1	23	+	11220400	11220822	0,205,102
chr3L	11220400	11222262	1	83	+	11220400	11222262	0,205,102
chr3L	11220407	11220600	1	44	+	11220407	11220600	0,205,102
chr3L	11220421	11220600	1	2	+	11220421	11220600	0,205,102
chr3L	11220600	11220743	1	1	+	11220600	11220743	0,255,127
chr3L	11220662	11220780	1	1	+	11220662	11220780	0,255,127
chr3L	11220713	11220860	1	1	+	11220713	11220860	0,255,127
chr3L	11220725	11593105	1	1	+	11220725	11593105	0,255,127
chr3L	11220818	11220983	1	1	+	11220818	11220983	0,255,127
chr3L	11221138	11222262	1	329	+	11221138	11222262	16,78,139
chr3L	11221247	11221934	1	1	+	11221247	11221934	0,255,127
chr3L	11221257	11222262	1	1	+	11221257	11222262	0,205,102
chr3L	11222254	11222372	1	1	+	11222254	11222372	0,255,127
chr3L	11222988	11223179	2	2	+	11222988	11223179	0,255,127
chr3L	11223127	11323539	1	1	+	11223127	11323539	0,255,127
chr3L	11223195	11516361	1	1	+	11223195	11516361	0,255,127
chr3L	11223231	11223418	1	1	+	11223231	11223418	0,255,127
chr3L	11223302	11223482	1	1	+	11223302	11223482	0,255,127
chr3L	11223722	11500416	1	1	+	11223722	11500416	0,255,127
chr3L	11224630	11225225	1	3	+	11224630	11225225	0,205,102
chr3L	11224630	11226230	2	2	+	11224630	11226230	0,205,102
chr3L	11224630	11226303	1	10	+	11224630	11226303	0,205,102
chr3L	11226181	11226352	1	1	+	11226181	11226352	0,205,102
chr3L	11226323	11226483	1	103	+	11226323	11226483	16,78,139
chr3L	11226521	11230526	1	1	+	11226521	11230526	0,205,102
chr3L	11226585	11227117	1	76	+	11226585	11227117	16,78,139
chr3L	11226884	11227117	1	1	+	11226884	11227117	0,205,102
chr3L	11227160	11227333	1	2	+	11227160	11227333	0,205,102
chr3L	11227171	11227333	1	42	+	11227171	11227333	16,78,139
chr3L	11227808	11227997	1	68	+	11227808	11227997	16,78,139
chr3L	11228166	11228363	1	103	+	11228166	11228363	16,78,139
chr3L	11228397	11228561	1	50	+	11228397	11228561	16,78,139
chr3L	11229308	11229740	1	9	+	11229308	11229740	0,205,102
chr3L	11229308	11230341	1	12	+	11229308	11230341	0,205,102
chr3L	11229323	11229740	1	1	+	11229323	11229740	0,205,102
chr3L	11229323	11230341	1	2	+	11229323	11230341	0,205,102
chr3L	11230679	11238967	1	1	+	11230679	11238967	0,205,102
chr3L	11234162	11371514	1	1	+	11234162	11371514	0,255,127
chr3L	11235565	11235737	1	1	+	11235565	11235737	0,255,127
chr3L	11238196	11238400	1	1	+	11238196	11238400	0,205,102
chr3L	11238236	11238400	1	5	+	11238236	11238400	0,205,102
chr3L	11241022	11245598	1	1	+	11241022	11245598	0,205,102
chr3L	11243690	11243915	1	1	+	11243690	11243915	0,205,102
chr3L	11243690	11244256	1	1	+	11243690	11244256	0,205,102
chr3L	11243935	11244256	1	4	+	11243935	11244256	0,205,102
chr3L	11244258	11244578	2	2	+	11244258	11244578	0,255,127
chr3L	11245411	11245532	1	1	+	11245411	11245532	0,255,127
chr3L	11245449	11245715	1	1	+	11245449	11245715	0,205,102
chr3L	11245497	11245737	1	1	+	11245497	11245737	0,255,127
chr3L	11245690	11245809	1	61	+	11245690	11245809	0,255,127
chr3L	11245694	11245809	1	92	+	11245694	11245809	0,255,127
chr3L	11245694	11245812	1	1	+	11245694	11245812	0,255,127
chr3L	11245768	11245886	1	1	+	11245768	11245886	0,255,127
chr3L	11245854	11248225	1	1	+	11245854	11248225	0,255,127
chr3L	11246010	11246852	10	2599	+	11246010	11246852	16,78,139
chr3L	11246451	11246896	1	1	+	11246451	11246896	0,205,102
chr3L	11246768	11246920	1	1	+	11246768	11246920	0,255,127
chr3L	11246870	11247779	1	1	+	11246870	11247779	0,255,127
chr3L	11246873	11247786	1	1	+	11246873	11247786	0,255,127
chr3L	11246873	11313361	1	1	+	11246873	11313361	0,255,127
chr3L	11246882	11247270	1	1	+	11246882	11247270	0,255,127
chr3L	11246932	11247630	1	1	+	11246932	11247630	0,255,127
chr3L	11247105	11247601	1	2	+	11247105	11247601	0,255,127
chr3L	11247225	11247763	1	1	+	11247225	11247763	0,255,127
chr3L	11247227	11247378	1	1	+	11247227	11247378	0,255,127
chr3L	11247377	11247571	1	1	+	11247377	11247571	0,255,127
chr3L	11247445	11247627	1	3	+	11247445	11247627	0,255,127
chr3L	11247480	11247609	1	5	+	11247480	11247609	0,255,127
chr3L	11247507	11247763	1	5	+	11247507	11247763	0,255,127
chr3L	11247591	11247796	1	2	+	11247591	11247796	0,255,127
chr3L	11247650	11248016	1	1	+	11247650	11248016	0,255,127
chr3L	11247654	11490124	1	1	+	11247654	11490124	0,255,127
chr3L	11247654	11547925	1	1	+	11247654	11547925	0,255,127
chr3L	11247676	11247835	2	2	+	11247676	11247835	0,255,127
chr3L	11247679	11247823	1	1	+	11247679	11247823	0,255,127
chr3L	11247679	11247825	1	1	+	11247679	11247825	0,255,127
chr3L	11247679	11247827	1	1	+	11247679	11247827	0,255,127
chr3L	11247679	11247833	1	1	+	11247679	11247833	0,255,127
chr3L	11247679	11248966	1	1	+	11247679	11248966	0,255,127
chr3L	11247679	11481403	1	4	+	11247679	11481403	0,255,127
chr3L	11247679	11490168	1	1	+	11247679	11490168	0,255,127
chr3L	11247683	11248249	1	1	+	11247683	11248249	0,255,127
chr3L	11247685	11247815	1	1	+	11247685	11247815	0,255,127
chr3L	11247691	11247867	1	1	+	11247691	11247867	0,255,127
chr3L	11247695	11247871	1	1	+	11247695	11247871	0,255,127
chr3L	11247702	11247817	1	1	+	11247702	11247817	0,255,127
chr3L	11247702	11247821	1	3	+	11247702	11247821	0,255,127
chr3L	11247702	11247823	1	2	+	11247702	11247823	0,205,102
chr3L	11247702	11247825	1	1	+	11247702	11247825	0,205,102
chr3L	11247702	11247827	1	1	+	11247702	11247827	0,205,102
chr3L	11247702	11247845	1	42	+	11247702	11247845	0,205,102
chr3L	11247702	11247855	1	1	+	11247702	11247855	0,205,102
chr3L	11247702	11248272	1	1	+	11247702	11248272	0,205,102
chr3L	11247702	11248290	2	2	+	11247702	11248290	0,205,102
chr3L	11247704	11247847	1	1	+	11247704	11247847	0,255,127
chr3L	11247704	11247857	1	1	+	11247704	11247857	0,255,127
chr3L	11247707	11247841	1	1	+	11247707	11247841	0,255,127
chr3L	11247707	11248270	1	1	+	11247707	11248270	0,255,127
chr3L	11247707	11481406	1	1	+	11247707	11481406	0,255,127
chr3L	11247710	11481449	1	1	+	11247710	11481449	0,255,127
chr3L	11247712	11481403	1	3	+	11247712	11481403	0,255,127
chr3L	11247715	11247831	1	1	+	11247715	11247831	0,255,127
chr3L	11247715	11247849	1	1	+	11247715	11247849	0,255,127
chr3L	11247715	11248258	1	1	+	11247715	11248258	0,255,127
chr3L	11247715	11248272	1	1	+	11247715	11248272	0,255,127
chr3L	11247715	11248274	1	7	+	11247715	11248274	0,255,127
chr3L	11247715	11248276	1	2	+	11247715	11248276	0,255,127
chr3L	11247715	11248984	1	1	+	11247715	11248984	0,255,127
chr3L	11247715	11481434	1	1	+	11247715	11481434	0,255,127
chr3L	11247719	11247839	1	1	+	11247719	11247839	0,255,127
chr3L	11247719	11247841	1	1	+	11247719	11247841	0,255,127
chr3L	11247719	11247843	1	1	+	11247719	11247843	0,255,127
chr3L	11247719	11247849	1	1	+	11247719	11247849	0,255,127
chr3L	11247719	11248272	1	1	+	11247719	11248272	0,255,127
chr3L	11247719	11248274	1	2	+	11247719	11248274	0,255,127
chr3L	11247719	11481406	1	1	+	11247719	11481406	0,255,127
chr3L	11247719	11481418	1	1	+	11247719	11481418	0,255,127
chr3L	11247719	11481449	1	1	+	11247719	11481449	0,255,127
chr3L	11247726	11247867	3	3	+	11247726	11247867	0,255,127
chr3L	11247730	11247871	1	1	+	11247730	11247871	0,255,127
chr3L	11247734	11248249	2	2	+	11247734	11248249	0,255,127
chr3L	11247736	11248249	1	1	+	11247736	11248249	0,255,127
chr3L	11247738	11248249	1	1	+	11247738	11248249	0,255,127
chr3L	11247740	11247871	1	1	+	11247740	11247871	0,255,127
chr3L	11247742	11481449	1	1	+	11247742	11481449	0,255,127
chr3L	11247744	11248249	1	1	+	11247744	11248249	0,255,127
chr3L	11247746	11481403	1	9	+	11247746	11481403	0,255,127
chr3L	11247748	11247871	1	3	+	11247748	11247871	0,255,127
chr3L	11247749	11247887	1	1	+	11247749	11247887	0,255,127
chr3L	11247749	11248266	1	1	+	11247749	11248266	0,255,127
chr3L	11247749	11248268	1	1	+	11247749	11248268	0,255,127
chr3L	11247749	11248270	1	101	+	11247749	11248270	0,255,127
chr3L	11247749	11248272	1	9	+	11247749	11248272	0,255,127
chr3L	11247749	11248274	1	5	+	11247749	11248274	0,255,127
chr3L	11247749	11248276	1	18	+	11247749	11248276	0,255,127
chr3L	11247749	11248278	1	5	+	11247749	11248278	0,255,127
chr3L	11247749	11248280	1	2	+	11247749	11248280	0,255,127
chr3L	11247749	11248286	1	1	+	11247749	11248286	0,255,127
chr3L	11247749	11248290	1	1	+	11247749	11248290	0,255,127
chr3L	11247749	11490172	1	1	+	11247749	11490172	0,255,127
chr3L	11247749	11490178	1	1	+	11247749	11490178	0,255,127
chr3L	11247749	11490182	1	1	+	11247749	11490182	0,255,127
chr3L	11247749	11546319	1	1	+	11247749	11546319	0,255,127
chr3L	11247754	11481449	1	1	+	11247754	11481449	0,255,127
chr3L	11247755	11248266	1	2	+	11247755	11248266	0,255,127
chr3L	11247755	11248270	1	1	+	11247755	11248270	0,255,127
chr3L	11247755	11248272	1	1	+	11247755	11248272	0,255,127
chr3L	11247755	11481432	1	1	+	11247755	11481432	0,255,127
chr3L	11247775	11248249	1	1	+	11247775	11248249	0,205,102
chr3L	11247780	11248268	1	1	+	11247780	11248268	0,255,127
chr3L	11247813	11248334	1	1	+	11247813	11248334	0,255,127
[truncated: 122,975 more rows]
