# Supplementary material for: Deep sequencing the circadian and diurnal transcriptome ofDrosophilabrain
Source: HighWire-hosted journal article supplement (doi:10.1101/gr.128876.111), 2012-04-03
Supplement: Table_S12c.xlsx [file Table_S12c.xlsx]

## Sheet: Sheet1
chr4	1000105	1251574	1	1	+	1000105	1251574	0,255,127
chr4	1000200	1000350	1	2	+	1000200	1000350	0,205,102
chr4	1000384	1292287	1	1	+	1000384	1292287	0,255,127
chr4	100053	164679	1	4	+	100053	164679	0,255,127
chr4	100084	165244	1	1	+	100084	165244	0,255,127
chr4	1001088	1063040	1	1	+	1001088	1063040	0,255,127
chr4	100111	164736	1	1	+	100111	164736	0,205,102
chr4	100111	164945	1	1	+	100111	164945	0,205,102
chr4	1001115	1026673	1	1	+	1001115	1026673	0,255,127
chr4	1001254	1130420	1	1	+	1001254	1130420	0,255,127
chr4	100129	165211	1	1	+	100129	165211	0,255,127
chr4	100146	164749	2	2	+	100146	164749	0,205,102
chr4	1001623	1002857	1	1	+	1001623	1002857	0,255,127
chr4	1001726	1002948	1	1	+	1001726	1002948	0,205,102
chr4	100190	164672	1	4	+	100190	164672	0,255,127
chr4	100197	164679	1	2	+	100197	164679	0,205,102
chr4	100230	164514	4	4	+	100230	164514	0,255,127
chr4	100230	164822	1	1	+	100230	164822	0,255,127
chr4	100230	164922	1	1	+	100230	164922	0,255,127
chr4	100268	165365	1	1	+	100268	165365	0,255,127
chr4	100272	164576	1	1	+	100272	164576	0,205,102
chr4	100272	164758	1	2	+	100272	164758	0,205,102
chr4	100272	165343	1	4	+	100272	165343	0,255,127
chr4	1002748	1031954	1	1	+	1002748	1031954	0,255,127
chr4	1002752	1023899	1	1	+	1002752	1023899	0,255,127
chr4	1002799	1009144	1	1	+	1002799	1009144	0,205,102
chr4	1002887	1146545	1	1	+	1002887	1146545	0,255,127
chr4	1002925	1003429	1	5	+	1002925	1003429	0,205,102
chr4	100298	165365	1	2	+	100298	165365	0,255,127
chr4	1004131	1009162	1	1	+	1004131	1009162	0,205,102
chr4	1004625	1004786	1	3	+	1004625	1004786	0,205,102
chr4	1004939	1014783	1	1	+	1004939	1014783	0,255,127
chr4	1005642	1005804	1	7	+	1005642	1005804	0,205,102
chr4	1005647	1005804	1	1	+	1005647	1005804	0,205,102
chr4	1006142	1009575	1	2	+	1006142	1009575	0,205,102
chr4	100620	164573	2	2	+	100620	164573	0,255,127
chr4	100620	165706	1	3	+	100620	165706	0,255,127
chr4	100620	165731	2	2	+	100620	165731	0,255,127
chr4	1006332	1007165	1	1	+	1006332	1007165	0,205,102
chr4	100784	165730	1	1	+	100784	165730	0,255,127
chr4	100786	165249	1	1	+	100786	165249	0,255,127
chr4	100794	164446	1	1	+	100794	164446	0,205,102
chr4	1007996	1274064	1	1	+	1007996	1274064	0,255,127
chr4	100838	165951	1	1	+	100838	165951	0,255,127
chr4	1008595	1177857	1	1	+	1008595	1177857	0,255,127
chr4	1008597	1070686	1	1	+	1008597	1070686	0,255,127
chr4	1008931	1009144	1	2	+	1008931	1009144	0,205,102
chr4	100920	165963	1	2	+	100920	165963	0,255,127
chr4	1009264	1012741	1	4	+	1009264	1012741	0,205,102
chr4	1009330	1009575	1	2	+	1009330	1009575	0,205,102
chr4	100941	165484	1	1	+	100941	165484	0,205,102
chr4	1009512	1012741	2	2	+	1009512	1012741	0,205,102
chr4	1010605	1010766	1	1	+	1010605	1010766	0,255,127
chr4	1010609	1010766	1	1	+	1010609	1010766	0,205,102
chr4	1010666	1010885	1	2	+	1010666	1010885	0,205,102
chr4	1010666	1012741	1	10	+	1010666	1012741	0,205,102
chr4	1010796	1026595	1	2	+	1010796	1026595	0,255,127
chr4	101083	167195	1	1	+	101083	167195	0,255,127
chr4	101086	164436	1	1	+	101086	164436	0,255,127
chr4	1011078	1012250	1	1	+	1011078	1012250	0,205,102
chr4	1011078	1012741	1	248	+	1011078	1012741	16,78,139
chr4	1011078	1017187	1	2	+	1011078	1017187	0,205,102
chr4	1011078	1024833	1	1	+	1011078	1024833	0,205,102
chr4	1011078	1026482	1	12	+	1011078	1026482	0,205,102
chr4	1011340	1012741	1	3	+	1011340	1012741	0,205,102
chr4	1011377	1115718	1	1	+	1011377	1115718	0,255,127
chr4	1011448	1211661	1	1	+	1011448	1211661	0,255,127
chr4	1011463	1251563	1	1	+	1011463	1251563	0,255,127
chr4	1011663	1012741	1	1	+	1011663	1012741	16,78,139
chr4	101182	164666	1	1	+	101182	164666	0,255,127
chr4	1011850	1015059	2	2	+	1011850	1015059	0,255,127
chr4	101260	164576	1	2	+	101260	164576	0,255,127
chr4	101260	164767	1	1	+	101260	164767	0,255,127
chr4	101281	167354	2	2	+	101281	167354	0,205,102
chr4	101281	167381	2	2	+	101281	167381	0,205,102
chr4	1012822	1017167	1	12	+	1012822	1017167	0,205,102
chr4	1012822	1017187	10	676	+	1012822	1017187	16,78,139
chr4	1012822	1024833	1	3	+	1012822	1024833	0,205,102
chr4	1012822	1026482	1	2	+	1012822	1026482	0,205,102
chr4	1012872	1013199	1	1	+	1012872	1013199	0,255,127
chr4	101289	366861	1	1	+	101289	366861	0,255,127
chr4	101313	167360	1	17	+	101313	167360	0,255,127
chr4	101337	167365	1	2	+	101337	167365	0,255,127
chr4	101349	167386	1	9	+	101349	167386	0,255,127
chr4	101354	167354	1	1	+	101354	167354	0,205,102
chr4	101362	165204	1	1	+	101362	165204	0,255,127
chr4	101362	167450	1	1	+	101362	167450	0,255,127
chr4	101386	300129	1	1	+	101386	300129	0,255,127
chr4	101406	167469	1	6	+	101406	167469	0,255,127
chr4	101431	102007	1	1	+	101431	102007	0,255,127
chr4	1014335	1067270	1	1	+	1014335	1067270	0,205,102
chr4	101447	135406	1	1	+	101447	135406	0,255,127
chr4	101449	167534	1	3	+	101449	167534	0,255,127
chr4	1015811	1016032	1	2	+	1015811	1016032	0,205,102
chr4	101606	167659	1	1	+	101606	167659	0,255,127
chr4	101618	165135	1	1	+	101618	165135	0,205,102
chr4	101618	167589	1	1	+	101618	167589	0,205,102
chr4	101633	167665	1	1	+	101633	167665	0,255,127
chr4	101675	102315	1	1	+	101675	102315	0,255,127
chr4	101677	167474	1	2	+	101677	167474	0,255,127
chr4	101684	167273	1	1	+	101684	167273	0,255,127
chr4	101687	167728	1	1	+	101687	167728	0,205,102
chr4	1017032	1017187	1	1	+	1017032	1017187	0,205,102
chr4	1017277	1024808	1	1	+	1017277	1024808	0,205,102
chr4	101728	167617	1	1	+	101728	167617	0,255,127
chr4	1017325	1017733	1	3	+	1017325	1017733	0,255,127
chr4	1017325	1018382	10	981	+	1017325	1018382	24116205
chr4	1017325	1026482	1	1	+	1017325	1026482	0,255,127
chr4	101762	165858	1	1	+	101762	165858	0,255,127
chr4	1017699	1017871	1	7	+	1017699	1017871	0,205,102
chr4	101771	167349	1	1	+	101771	167349	0,255,127
chr4	101787	167839	2	2	+	101787	167839	0,255,127
chr4	101798	167850	1	2	+	101798	167850	0,255,127
chr4	101811	167743	1	3	+	101811	167743	0,255,127
chr4	101830	167642	1	1	+	101830	167642	0,255,127
chr4	1018459	1019298	10	1160	+	1018459	1019298	16,78,139
chr4	1018459	1024833	2	2	+	1018459	1024833	0,205,102
chr4	101872	167875	1	5	+	101872	167875	0,255,127
chr4	101880	164753	1	1	+	101880	164753	0,205,102
chr4	1019269	1024392	3	3	+	1019269	1024392	0,255,127
chr4	1019269	1024771	1	1	+	1019269	1024771	0,255,127
chr4	1019269	1024833	1	866	+	1019269	1024833	24116205
chr4	1019269	1026482	1	6	+	1019269	1026482	0,255,127
chr4	1019281	1019435	1	1	+	1019281	1019435	0,205,102
chr4	1019281	1024392	1	10	+	1019281	1024392	0,205,102
chr4	1019281	1024833	14	1658	+	1019281	1024833	16,78,139
chr4	1019281	1026482	1	25	+	1019281	1026482	0,205,102
chr4	101931	168035	1	1	+	101931	168035	0,205,102
chr4	101938	167899	1	2	+	101938	167899	0,255,127
chr4	1019428	1019697	1	1	+	1019428	1019697	0,255,127
chr4	101952	168003	1	1	+	101952	168003	0,255,127
chr4	101955	167591	2	2	+	101955	167591	0,255,127
chr4	1019791	1045510	1	1	+	1019791	1045510	0,255,127
chr4	1019844	1045515	1	1	+	1019844	1045515	0,255,127
chr4	1019844	1115808	1	1	+	1019844	1115808	0,255,127
chr4	1019844	1274064	1	1	+	1019844	1274064	0,255,127
chr4	101985	167368	1	1	+	101985	167368	0,255,127
chr4	1019885	1150047	1	1	+	1019885	1150047	0,255,127
chr4	1019923	1021646	1	1	+	1019923	1021646	0,255,127
chr4	101999	167591	3	3	+	101999	167591	0,205,102
chr4	101999	167988	1	3	+	101999	167988	0,205,102
chr4	101999	167997	1	1	+	101999	167997	0,255,127
chr4	101999	168023	1	3	+	101999	168023	0,255,127
chr4	102007	168035	2	2	+	102007	168035	0,255,127
chr4	102018	167671	1	1	+	102018	167671	0,205,102
chr4	102018	167875	1	1	+	102018	167875	0,205,102
chr4	102018	167988	1	1	+	102018	167988	0,205,102
chr4	102024	164576	1	2	+	102024	164576	0,255,127
chr4	102044	168035	1	2	+	102044	168035	0,255,127
chr4	102063	165680	1	1	+	102063	165680	0,255,127
chr4	102063	167999	1	2	+	102063	167999	0,255,127
chr4	102073	168035	1	1	+	102073	168035	0,255,127
chr4	102073	168095	1	1	+	102073	168095	0,255,127
chr4	102075	168031	1	1	+	102075	168031	0,255,127
chr4	102086	167988	2	2	+	102086	167988	0,255,127
chr4	102093	167995	2	2	+	102093	167995	0,255,127
chr4	102093	168110	1	4	+	102093	168110	0,255,127
chr4	102093	168129	1	1	+	102093	168129	0,255,127
chr4	102099	164672	2	2	+	102099	164672	0,255,127
chr4	102102	168103	1	1	+	102102	168103	0,255,127
chr4	102102	168137	1	1	+	102102	168137	0,255,127
chr4	102107	167982	1	1	+	102107	167982	0,255,127
chr4	102111	167899	1	1	+	102111	167899	0,205,102
chr4	102111	168202	1	1	+	102111	168202	0,255,127
chr4	102115	168028	1	1	+	102115	168028	0,255,127
chr4	102115	168162	1	1	+	102115	168162	0,255,127
chr4	102119	167403	1	1	+	102119	167403	0,255,127
chr4	102130	165315	1	1	+	102130	165315	0,255,127
chr4	1021331	1021484	1	1	+	1021331	1021484	0,255,127
chr4	102147	168158	1	1	+	102147	168158	0,255,127
chr4	1021504	1021934	2	2	+	1021504	1021934	0,255,127
chr4	102151	164508	1	1	+	102151	164508	0,205,102
chr4	102154	167870	1	1	+	102154	167870	0,255,127
chr4	1021552	1021945	1	2	+	1021552	1021945	0,255,127
chr4	1021580	1021934	1	1	+	1021580	1021934	0,255,127
chr4	1021626	1021943	2	2	+	1021626	1021943	0,255,127
chr4	102171	105753	1	3	+	102171	105753	0,255,127
chr4	102171	116966	2	2	+	102171	116966	0,255,127
chr4	102171	167978	1	7	+	102171	167978	0,255,127
chr4	102171	168191	1	1	+	102171	168191	0,255,127
chr4	102171	168193	1	1	+	102171	168193	0,255,127
chr4	102171	168206	1	1	+	102171	168206	0,255,127
chr4	102171	168317	1	1	+	102171	168317	0,255,127
chr4	102179	168103	1	4	+	102179	168103	0,205,102
chr4	102182	164666	1	1	+	102182	164666	0,255,127
chr4	102182	168129	1	3	+	102182	168129	0,255,127
chr4	102182	168197	1	1	+	102182	168197	0,255,127
chr4	102187	168129	1	3	+	102187	168129	0,255,127
chr4	102188	168112	1	1	+	102188	168112	0,255,127
chr4	102188	168129	1	1	+	102188	168129	0,255,127
chr4	102207	168210	1	1	+	102207	168210	0,255,127
chr4	102211	167967	1	1	+	102211	167967	0,255,127
chr4	102221	168206	1	1	+	102221	168206	0,255,127
chr4	102227	168206	1	7	+	102227	168206	0,255,127
chr4	102240	167354	1	1	+	102240	167354	0,205,102
chr4	102248	168158	1	1	+	102248	168158	0,255,127
chr4	102254	164576	1	3	+	102254	164576	0,255,127
chr4	102267	168326	1	2	+	102267	168326	0,255,127
chr4	102283	167978	1	12	+	102283	167978	0,255,127
chr4	1022974	1024833	1	1	+	1022974	1024833	0,205,102
chr4	102309	168003	1	2	+	102309	168003	0,255,127
chr4	102332	168050	1	1	+	102332	168050	0,255,127
chr4	102392	168317	1	1	+	102392	168317	0,255,127
chr4	1023942	1135383	1	4	+	1023942	1135383	0,255,127
chr4	1024387	1024833	1	1	+	1024387	1024833	0,205,102
chr4	1024434	1024771	1	1	+	1024434	1024771	0,205,102
chr4	1024434	1024833	1	48	+	1024434	1024833	0,205,102
chr4	1024458	1024833	2	2	+	1024458	1024833	0,205,102
chr4	1024799	1025028	1	1	+	1024799	1025028	0,255,127
chr4	1024944	1026855	1	1	+	1024944	1026855	0,255,127
chr4	1024949	1025145	1	128	+	1024949	1025145	16,78,139
chr4	1024953	1025145	1	1	+	1024953	1025145	0,205,102
chr4	1024986	1025177	1	1	+	1024986	1025177	0,205,102
chr4	1024986	1029602	1	3	+	1024986	1029602	0,205,102
chr4	1024988	1025145	108	15349	+	1024988	1025145	16,78,139
chr4	1024988	1025161	1	9	+	1024988	1025161	0,205,102
chr4	1025194	1025350	1	2	+	1025194	1025350	0,205,102
chr4	1025194	1026482	104	5427	+	1025194	1026482	16,78,139
chr4	1025194	1026493	1	1	+	1025194	1026493	0,205,102
chr4	1025194	1026565	1	1	+	1025194	1026565	0,205,102
chr4	102526	107668	1	1	+	102526	107668	0,205,102
chr4	1025326	1025477	1	3	+	1025326	1025477	0,205,102
chr4	1025326	1025486	1	7	+	1025326	1025486	0,205,102
chr4	1025394	1032052	1	1	+	1025394	1032052	0,255,127
chr4	1025418	1135451	1	1	+	1025418	1135451	0,255,127
chr4	1025490	1026038	1	1	+	1025490	1026038	0,255,127
chr4	1025509	1026482	1	6	+	1025509	1026482	0,205,102
chr4	1025532	1026653	2	2	+	1025532	1026653	0,255,127
chr4	1025985	1154995	1	1	+	1025985	1154995	0,255,127
chr4	1026180	1026673	1	1	+	1026180	1026673	0,255,127
chr4	1026489	1026673	1	3	+	1026489	1026673	0,255,127
chr4	1026511	1026786	1	1	+	1026511	1026786	0,255,127
chr4	1026585	1026741	10	2448	+	1026585	1026741	16,78,139
chr4	1026590	1026741	1	1	+	1026590	1026741	0,205,102
chr4	1026700	1026855	1	1	+	1026700	1026855	0,205,102
chr4	1026839	1055180	1	1	+	1026839	1055180	0,255,127
chr4	1027113	1029209	1	1	+	1027113	1029209	0,205,102
chr4	1027341	1229048	1	1	+	1027341	1229048	0,255,127
chr4	102762	103313	1	7	+	102762	103313	16,78,139
chr4	1028547	1031954	1	1	+	1028547	1031954	0,255,127
chr4	1029830	1032045	1	1	+	1029830	1032045	0,205,102
chr4	1030484	1098459	1	1	+	1030484	1098459	0,255,127
chr4	1030668	1137809	1	1	+	1030668	1137809	0,255,127
chr4	1030700	1030977	1	1	+	1030700	1030977	0,255,127
chr4	103090	103329	1	1	+	103090	103329	0,255,127
chr4	1030923	1031134	1	1	+	1030923	1031134	0,255,127
chr4	1030988	1115808	1	3	+	1030988	1115808	0,255,127
chr4	1031123	1031606	2	2	+	1031123	1031606	0,255,127
chr4	1031258	1032045	1	2	+	1031258	1032045	0,205,102
chr4	1031543	1115808	1	5	+	1031543	1115808	0,255,127
chr4	1031752	1031895	1	1	+	1031752	1031895	0,255,127
chr4	1031762	1031917	1	3	+	1031762	1031917	0,255,127
chr4	1031836	1115808	1	1	+	1031836	1115808	0,255,127
chr4	1031885	1032045	1	1	+	1031885	1032045	0,205,102
chr4	1031885	1032052	1	5	+	1031885	1032052	0,205,102
chr4	1031890	1032045	1	16	+	1031890	1032045	0,205,102
chr4	1031890	1032052	1	6	+	1031890	1032052	0,205,102
chr4	1031902	1096219	1	1	+	1031902	1096219	0,255,127
chr4	1031906	1037640	1	1	+	1031906	1037640	0,255,127
chr4	1031912	1032971	1	2	+	1031912	1032971	0,255,127
chr4	1031914	1091106	3	3	+	1031914	1091106	0,255,127
chr4	1031919	1032971	1	1	+	1031919	1032971	0,255,127
chr4	1031934	1045515	1	1	+	1031934	1045515	0,255,127
chr4	1031938	1067592	1	1	+	1031938	1067592	0,205,102
chr4	1031975	1032102	1	1	+	1031975	1032102	0,255,127
chr4	1032006	1112002	1	1	+	1032006	1112002	0,255,127
chr4	1032010	1032180	1	1	+	1032010	1032180	0,205,102
chr4	1032214	1251081	1	1	+	1032214	1251081	0,255,127
chr4	103252	106387	1	1	+	103252	106387	0,255,127
chr4	1032716	1033158	1	1	+	1032716	1033158	0,255,127
chr4	103274	106587	1	1	+	103274	106587	0,255,127
chr4	103277	106399	1	1	+	103277	106399	0,255,127
chr4	103277	166234	1	1	+	103277	166234	0,255,127
chr4	103322	104713	1	1	+	103322	104713	0,205,102
chr4	103322	106387	104	11763	+	103322	106387	16,78,139
chr4	103322	106402	1	4	+	103322	106402	0,205,102
chr4	103326	106387	1	20	+	103326	106387	16,78,139
chr4	1034344	1034993	1	1171	+	1034344	1034993	16,78,139
chr4	1034719	1034882	1	1	+	1034719	1034882	0,255,127
chr4	1035089	1035258	1	17	+	1035089	1035258	0,205,102
chr4	1035101	1035257	1	1	+	1035101	1035257	0,255,127
chr4	1035102	1035258	10	2903	+	1035102	1035258	16,78,139
chr4	1035102	1035453	1	9	+	1035102	1035453	0,205,102
chr4	1035265	1035453	1	3	+	1035265	1035453	0,205,102
chr4	1035298	1035453	1	1	+	1035298	1035453	0,205,102
chr4	1035304	1035453	1	984	+	1035304	1035453	16,78,139
chr4	1035422	1035641	1	9	+	1035422	1035641	0,205,102
chr4	1035484	1035641	10	2363	+	1035484	1035641	16,78,139
chr4	1035769	1035916	1	1	+	1035769	1035916	0,255,127
chr4	1035855	1040581	1	1	+	1035855	1040581	0,255,127
chr4	1035869	1036100	1	6	+	1035869	1036100	0,205,102
chr4	1035877	1036100	1	87	+	1035877	1036100	0,205,102
chr4	1035877	1047638	1	1	+	1035877	1047638	0,205,102
chr4	1035928	1036100	10	24240	+	1035928	1036100	16,78,139
chr4	1036196	1037051	1	1886	+	1036196	1037051	16,78,139
chr4	1036196	1042917	1	28	+	1036196	1042917	16,78,139
chr4	1036196	1047638	1	3	+	1036196	1047638	0,205,102
chr4	1036794	1037256	1	1	+	1036794	1037256	0,255,127
chr4	1036864	1037051	1	3	+	1036864	1037051	0,205,102
chr4	1037056	1047638	1	1	+	1037056	1047638	0,205,102
chr4	1037095	1047638	1	3	+	1037095	1047638	0,205,102
chr4	1037199	1038990	1	1	+	1037199	1038990	0,255,127
chr4	1038341	1038462	1	1	+	1038341	1038462	0,255,127
chr4	1038433	1038596	1	2	+	1038433	1038596	0,205,102
chr4	1038731	1038962	1	1	+	1038731	1038962	0,205,102
chr4	1038731	1047638	1	1	+	1038731	1047638	0,205,102
chr4	1038787	1038962	1	14	+	1038787	1038962	0,205,102
chr4	1038787	1047638	2	2	+	1038787	1047638	0,205,102
chr4	1039221	1039889	1	1	+	1039221	1039889	0,255,127
chr4	1039285	1039445	1	7205	+	1039285	1039445	16,78,139
chr4	1039285	1042917	5	5	+	1039285	1042917	0,205,102
chr4	1039433	1047638	1	1	+	1039433	1047638	0,205,102
chr4	1039513	1039661	1	1	+	1039513	1039661	0,255,127
chr4	1039604	1184610	1	1	+	1039604	1184610	0,255,127
chr4	1039618	1039834	1	1	+	1039618	1039834	0,205,102
chr4	1039651	1039876	1	1	+	1039651	1039876	0,205,102
chr4	1039943	1040204	1	1	+	1039943	1040204	0,255,127
chr4	1040591	1040870	1	1	+	1040591	1040870	0,205,102
chr4	1040591	1042917	1	6078	+	1040591	1042917	16,78,139
chr4	1040591	1046891	1	3	+	1040591	1046891	16,78,139
chr4	1040591	1047638	1	41	+	1040591	1047638	0,205,102
chr4	1040598	1047638	1	2	+	1040598	1047638	0,255,127
chr4	1040606	1042917	1	1	+	1040606	1042917	0,255,127
chr4	1040752	1042917	3	3	+	1040752	1042917	0,205,102
chr4	1043023	1043807	1	1	+	1043023	1043807	0,255,127
chr4	1043213	1044205	1	1	+	1043213	1044205	0,205,102
chr4	1043277	1044295	1	1	+	1043277	1044295	0,255,127
chr4	1043295	1043448	1	1	+	1043295	1043448	0,255,127
chr4	1043304	1043873	1	1	+	1043304	1043873	0,255,127
chr4	1043387	1043625	1	1	+	1043387	1043625	0,255,127
chr4	1043396	1044120	1	1	+	1043396	1044120	0,255,127
chr4	1043467	1043590	1	1	+	1043467	1043590	0,255,127
chr4	1043556	1044143	1	1	+	1043556	1044143	0,255,127
chr4	1043563	1043866	1	1	+	1043563	1043866	0,205,102
chr4	1043565	1043724	1	1	+	1043565	1043724	0,255,127
chr4	1043567	1044134	1	1	+	1043567	1044134	0,255,127
chr4	1043571	1044147	1	1	+	1043571	1044147	0,255,127
chr4	1043581	1044110	3	3	+	1043581	1044110	0,255,127
chr4	1043766	1044071	2	2	+	1043766	1044071	0,205,102
chr4	1043802	1043929	1	1	+	1043802	1043929	0,255,127
chr4	1043952	1044083	1	1	+	1043952	1044083	0,255,127
chr4	1044004	1044185	1	1	+	1044004	1044185	0,205,102
chr4	1044030	1044185	1	2	+	1044030	1044185	0,205,102
chr4	1044140	1044289	1	1	+	1044140	1044289	0,255,127
chr4	1044256	1046891	1	20	+	1044256	1046891	0,205,102
chr4	1044256	1047445	1	8	+	1044256	1047445	16,78,139
chr4	1044256	1047449	1	1	+	1044256	1047449	0,205,102
chr4	1044256	1047461	1	1	+	1044256	1047461	0,205,102
chr4	1044256	1047638	1	772	+	1044256	1047638	16,78,139
chr4	1044256	1049877	1	3	+	1044256	1049877	0,205,102
chr4	1044700	1044876	1	1	+	1044700	1044876	0,205,102
chr4	104491	104606	1	1	+	104491	104606	0,255,127
chr4	1044959	1097430	1	1	+	1044959	1097430	0,255,127
chr4	1045453	1245187	1	1	+	1045453	1245187	0,255,127
chr4	1045453	1274064	1	36	+	1045453	1274064	0,255,127
chr4	1045463	1274057	1	2	+	1045463	1274057	0,255,127
chr4	1046015	1066270	1	1	+	1046015	1066270	0,255,127
chr4	1046232	1066375	1	1	+	1046232	1066375	0,255,127
chr4	1046236	1066386	1	1	+	1046236	1066386	0,255,127
chr4	1046305	1183894	1	1	+	1046305	1183894	0,255,127
chr4	1046316	1066459	2	2	+	1046316	1066459	0,255,127
chr4	1046360	1046491	1	1	+	1046360	1046491	0,255,127
chr4	1046475	1184044	1	1	+	1046475	1184044	0,255,127
chr4	1046868	1047638	1	2	+	1046868	1047638	0,205,102
chr4	1046868	1047682	2	2	+	1046868	1047682	0,205,102
chr4	1046941	1047209	1	1	+	1046941	1047209	0,205,102
chr4	1046941	1047445	1	1	+	1046941	1047445	0,205,102
chr4	1046941	1047449	1	1	+	1046941	1047449	0,205,102
chr4	1046941	1047638	1	13	+	1046941	1047638	0,205,102
chr4	1046941	1047682	1	1	+	1046941	1047682	0,205,102
chr4	1046968	1047638	1	1	+	1046968	1047638	0,255,127
chr4	1046988	1047638	1	1	+	1046988	1047638	0,255,127
chr4	1047017	1047402	1	1	+	1047017	1047402	0,205,102
chr4	1047111	1047638	1	2	+	1047111	1047638	0,205,102
chr4	1047111	1047682	1	1	+	1047111	1047682	16,78,139
chr4	1047141	1047638	1	2	+	1047141	1047638	0,255,127
chr4	1047228	1047445	1	2	+	1047228	1047445	0,205,102
chr4	1047228	1047638	1	7	+	1047228	1047638	0,205,102
chr4	1047256	1047445	2	2	+	1047256	1047445	0,205,102
chr4	1047256	1047638	1	1	+	1047256	1047638	0,205,102
chr4	1047269	1047638	1	1	+	1047269	1047638	0,205,102
chr4	1048458	1050714	1	1	+	1048458	1050714	0,205,102
chr4	1048458	1051958	1	5	+	1048458	1051958	0,205,102
chr4	1048458	1052266	1	17	+	1048458	1052266	0,205,102
chr4	1048904	1236904	1	1	+	1048904	1236904	0,205,102
chr4	1049364	1049842	1	1	+	1049364	1049842	0,255,127
chr4	1050112	1050362	1	1	+	1050112	1050362	0,205,102
chr4	1050117	1050362	1	3	+	1050117	1050362	0,205,102
chr4	1050262	1050459	1	12	+	1050262	1050459	0,205,102
chr4	1050262	1050714	1	1	+	1050262	1050714	0,205,102
chr4	1050262	1051958	1	1	+	1050262	1051958	0,205,102
chr4	1050411	1050576	1	6	+	1050411	1050576	0,205,102
chr4	1050411	1050714	1	8	+	1050411	1050714	0,205,102
chr4	1050411	1051958	1	1	+	1050411	1051958	0,205,102
chr4	1050411	1052266	1	5	+	1050411	1052266	0,205,102
chr4	1050415	1050576	1	1	+	1050415	1050576	0,205,102
chr4	1050727	1051958	1	3	+	1050727	1051958	0,205,102
chr4	1050727	1052266	1	13	+	1050727	1052266	0,205,102
chr4	1050894	1051052	1	1	+	1050894	1051052	0,255,127
chr4	1050948	1052266	1	3	+	1050948	1052266	0,205,102
chr4	1051353	1052227	1	1	+	1051353	1052227	0,205,102
chr4	1051353	1052270	1	11	+	1051353	1052270	16,78,139
chr4	1051353	1053560	1	2	+	1051353	1053560	0,205,102
chr4	1051976	1052266	1	8	+	1051976	1052266	0,255,127
chr4	1051976	1053582	1	1	+	1051976	1053582	0,255,127
chr4	1052299	1052460	1	1	+	1052299	1052460	0,205,102
chr4	1052318	1052478	1	22	+	1052318	1052478	16,78,139
chr4	1052529	1052864	1	1	+	1052529	1052864	0,205,102
chr4	1052529	1053582	10	763	+	1052529	1053582	16,78,139
chr4	1052813	1053582	1	1	+	1052813	1053582	16,78,139
chr4	1053399	1053582	1	1	+	1053399	1053582	0,205,102
chr4	1053556	1054066	1	1	+	1053556	1054066	0,255,127
chr4	105372	105494	2	2	+	105372	105494	0,255,127
chr4	1053794	1053947	114	2816	+	1053794	1053947	16,78,139
chr4	1053896	1054371	1	5	+	1053896	1054371	0,255,127
chr4	1053981	1054507	1	1	+	1053981	1054507	0,255,127
chr4	1054021	1078405	1	1	+	1054021	1078405	0,205,102
chr4	1054033	1201998	1	1	+	1054033	1201998	0,255,127
chr4	1054071	1054507	1	1	+	1054071	1054507	0,255,127
chr4	1054107	1054294	1	1	+	1054107	1054294	0,205,102
chr4	1054149	1054315	1	2	+	1054149	1054315	0,255,127
chr4	1054159	1054294	1	1	+	1054159	1054294	0,205,102
chr4	1054162	1054402	1	1	+	1054162	1054402	0,255,127
chr4	1054181	1054744	1	1	+	1054181	1054744	0,255,127
chr4	1054194	1054391	1	1	+	1054194	1054391	0,205,102
chr4	1054197	1054445	1	4	+	1054197	1054445	0,255,127
chr4	1054202	1054578	1	1	+	1054202	1054578	0,255,127
chr4	1054207	1054516	1	1	+	1054207	1054516	0,255,127
chr4	1054243	1054402	1	2	+	1054243	1054402	0,255,127
chr4	1054246	1054443	1	1	+	1054246	1054443	0,255,127
chr4	1054248	1054445	1	1	+	1054248	1054445	0,255,127
chr4	1054311	1054542	1	1	+	1054311	1054542	0,255,127
chr4	1054338	1054499	1	1	+	1054338	1054499	0,255,127
chr4	1054353	1054585	1	3	+	1054353	1054585	0,255,127
chr4	1054371	1054535	1	1	+	1054371	1054535	0,255,127
chr4	1054379	1054542	1	2	+	1054379	1054542	0,205,102
chr4	1054391	1054585	1	1	+	1054391	1054585	0,255,127
chr4	1054395	1054512	1	1	+	1054395	1054512	0,255,127
chr4	1054395	1054542	1	1	+	1054395	1054542	0,255,127
chr4	1054442	1054647	1	1	+	1054442	1054647	0,255,127
chr4	1054445	1054647	1	5	+	1054445	1054647	0,255,127
chr4	1054448	1054647	1	1	+	1054448	1054647	0,255,127
chr4	1054448	1054703	1	1	+	1054448	1054703	0,255,127
chr4	1054448	1054860	1	1	+	1054448	1054860	0,255,127
chr4	1054448	1092116	1	1	+	1054448	1092116	0,255,127
chr4	1054457	1054735	1	1	+	1054457	1054735	0,255,127
chr4	1054476	1055059	1	1	+	1054476	1055059	0,255,127
chr4	1054500	1055061	2	2	+	1054500	1055061	0,255,127
chr4	1054579	1056657	1	1	+	1054579	1056657	0,205,102
chr4	1054597	1054725	1	1	+	1054597	1054725	0,255,127
chr4	1054597	1054919	1	1	+	1054597	1054919	0,255,127
chr4	1054637	1137359	1	1	+	1054637	1137359	0,255,127
chr4	1054682	1055108	1	1	+	1054682	1055108	0,255,127
chr4	1054697	1054967	1	1	+	1054697	1054967	0,255,127
chr4	1054809	1055014	1	1	+	1054809	1055014	0,255,127
chr4	1054813	1055009	1	1	+	1054813	1055009	0,205,102
chr4	1054884	1055125	1	1	+	1054884	1055125	0,255,127
chr4	1054902	1257957	2	2	+	1054902	1257957	0,255,127
chr4	1054914	1055047	1	1	+	1054914	1055047	0,255,127
chr4	1054918	1055129	1	1	+	1054918	1055129	0,255,127
chr4	1054920	1134234	1	1	+	1054920	1134234	0,255,127
chr4	1054971	1055479	1	1	+	1054971	1055479	0,255,127
chr4	1055062	1055612	1	1	+	1055062	1055612	0,255,127
chr4	1055072	1056231	1	1	+	1055072	1056231	0,255,127
chr4	1055072	1159198	1	3	+	1055072	1159198	0,255,127
chr4	1055075	1055536	1	1	+	1055075	1055536	0,255,127
chr4	1055075	1060924	1	1	+	1055075	1060924	0,255,127
chr4	1055080	1056591	1	1	+	1055080	1056591	0,255,127
chr4	1055102	1096916	1	1	+	1055102	1096916	0,255,127
chr4	1055102	1228383	1	1	+	1055102	1228383	0,255,127
chr4	1055113	1055579	1	1	+	1055113	1055579	0,255,127
chr4	1055843	1055961	1	1	+	1055843	1055961	0,255,127
chr4	1055925	1056405	1	1	+	1055925	1056405	0,255,127
chr4	1056048	1058035	1	1	+	1056048	1058035	0,255,127
chr4	1056048	1061450	1	1	+	1056048	1061450	0,255,127
chr4	1056485	1160355	1	1	+	1056485	1160355	0,205,102
chr4	1056800	1056926	1	1	+	1056800	1056926	0,255,127
chr4	1056811	1056942	1	1	+	1056811	1056942	0,255,127
chr4	1056897	1057461	1	1	+	1056897	1057461	0,255,127
chr4	1057393	1057544	1	1	+	1057393	1057544	0,255,127
chr4	1057643	1057795	1	1	+	1057643	1057795	0,255,127
chr4	1057643	1057918	1	1	+	1057643	1057918	0,255,127
chr4	1057643	1095129	1	1	+	1057643	1095129	0,255,127
chr4	1057903	1058393	1	1	+	1057903	1058393	0,255,127
chr4	1057973	1058151	1	5	+	1057973	1058151	0,205,102
chr4	1057993	1058151	1	10	+	1057993	1058151	0,205,102
chr4	1057994	1058151	1	1	+	1057994	1058151	0,255,127
chr4	1057998	1058147	1	2	+	1057998	1058147	0,205,102
chr4	1057998	1058151	1073	35657	+	1057998	1058151	16,78,139
chr4	1057998	1058163	1	21	+	1057998	1058163	0,205,102
chr4	1057998	1058177	1	10	+	1057998	1058177	0,205,102
chr4	1058002	1058155	1	2	+	1058002	1058155	0,255,127
chr4	1058081	1137817	1	1	+	1058081	1137817	0,255,127
chr4	1058097	1058369	1	1	+	1058097	1058369	0,205,102
chr4	1058145	1058321	1	176	+	1058145	1058321	0,205,102
chr4	1058145	1058369	1	3	+	1058145	1058369	0,205,102
chr4	1058166	1058321	100	24846	+	1058166	1058321	16,78,139
chr4	1058166	1058369	1	2	+	1058166	1058369	0,205,102
chr4	1058166	1059034	1	249	+	1058166	1059034	0,205,102
chr4	1058166	1065831	1	2	+	1058166	1065831	0,205,102
chr4	1058275	1064143	1	1	+	1058275	1064143	0,205,102
chr4	1058297	1064160	1	1	+	1058297	1064160	0,255,127
chr4	1058316	1058970	1	1	+	1058316	1058970	0,205,102
chr4	1058316	1059034	1063	28390	+	1058316	1059034	16,78,139
chr4	1058316	1060688	1	1	+	1058316	1060688	0,205,102
chr4	1058316	1064143	1	48	+	1058316	1064143	0,205,102
chr4	1058316	1065831	1	315	+	1058316	1065831	16,78,139
chr4	1058337	1059034	1	11	+	1058337	1059034	0,205,102
chr4	1058569	1059034	1	2	+	1058569	1059034	0,205,102
chr4	105866	106387	1	1	+	105866	106387	0,255,127
chr4	1058989	1061450	1	1	+	1058989	1061450	0,255,127
chr4	1059006	1064143	1	1	+	1059006	1064143	0,205,102
chr4	1059010	1059558	1	5	+	1059010	1059558	0,205,102
chr4	1059010	1060671	2	2	+	1059010	1060671	0,205,102
chr4	1059010	1060684	1	1	+	1059010	1060684	0,205,102
chr4	1059010	1060688	11	4415	+	1059010	1060688	16,78,139
chr4	1059010	1064018	1	1	+	1059010	1064018	0,205,102
chr4	1059010	1064143	1	1538	+	1059010	1064143	0,205,102
chr4	1059010	1065831	1	114	+	1059010	1065831	0,205,102
chr4	1059013	1059558	1	23	+	1059013	1059558	0,205,102
chr4	1059013	1060688	10	2373	+	1059013	1060688	16,78,139
chr4	1059013	1064018	1	1	+	1059013	1064018	0,205,102
chr4	1059013	1064143	1	5093	+	1059013	1064143	16,78,139
chr4	1059013	1065831	1	736	+	1059013	1065831	16,78,139
chr4	1059013	1067939	1	1	+	1059013	1067939	0,205,102
chr4	1059013	1074173	1	1	+	1059013	1074173	0,205,102
chr4	1059013	1232428	1	1	+	1059013	1232428	0,205,102
chr4	1059029	1059400	2	2	+	1059029	1059400	0,205,102
chr4	1059029	1061327	1	1	+	1059029	1061327	0,205,102
chr4	1059029	1061473	1	1	+	1059029	1061473	0,205,102
chr4	1059034	1060688	1	49	+	1059034	1060688	0,205,102
chr4	1059034	1064143	1	48	+	1059034	1064143	16,78,139
chr4	1059034	1065831	1	10	+	1059034	1065831	0,205,102
chr4	1059045	1059580	1	2	+	1059045	1059580	0,255,127
chr4	1059047	1059281	1	1	+	1059047	1059281	0,255,127
chr4	1059055	1059175	1	1	+	1059055	1059175	0,255,127
chr4	1059258	1065022	1	1	+	1059258	1065022	0,255,127
chr4	1059287	1060023	1	1	+	1059287	1060023	0,255,127
chr4	105933	106093	1	3	+	105933	106093	0,205,102
chr4	105933	106387	2	2	+	105933	106387	0,205,102
chr4	1059364	1059558	1	1	+	1059364	1059558	0,255,127
chr4	1059367	1148458	2	2	+	1059367	1148458	0,255,127
chr4	1059373	1059549	2	2	+	1059373	1059549	0,255,127
chr4	1059393	1060170	1	1	+	1059393	1060170	0,255,127
chr4	1059399	1059558	1	5	+	1059399	1059558	0,205,102
chr4	1059407	1059558	1	15	+	1059407	1059558	0,205,102
chr4	1059416	1059558	1	1	+	1059416	1059558	0,205,102
chr4	1059423	1062062	2	2	+	1059423	1062062	0,255,127
chr4	1059423	1115744	1	1	+	1059423	1115744	0,205,102
chr4	1059447	1059580	1	1	+	1059447	1059580	0,255,127
chr4	1059500	1091427	1	1	+	1059500	1091427	0,255,127
chr4	1059541	1059846	1	2	+	1059541	1059846	0,255,127
chr4	1059669	1065831	1	1	+	1059669	1065831	0,205,102
chr4	1059769	1059959	1	1	+	1059769	1059959	0,255,127
chr4	1059894	1060016	1	1	+	1059894	1060016	0,255,127
chr4	1060086	1060208	1	1	+	1060086	1060208	0,255,127
chr4	1060259	1062987	1	1	+	1060259	1062987	0,255,127
chr4	1060647	1061243	1	1	+	1060647	1061243	0,205,102
chr4	1060650	1061867	1	1	+	1060650	1061867	0,255,127
chr4	1060650	1064139	1	1	+	1060650	1064139	0,255,127
chr4	1060652	1061243	1	1	+	1060652	1061243	0,255,127
chr4	1060652	1064143	1	1	+	1060652	1064143	0,255,127
chr4	1060654	1060810	1	1	+	1060654	1060810	0,255,127
chr4	1060654	1060819	1	1	+	1060654	1060819	0,255,127
chr4	1060654	1060831	1	1	+	1060654	1060831	0,255,127
chr4	1060654	1060899	1	9	+	1060654	1060899	0,205,102
chr4	1060654	1060937	1	1	+	1060654	1060937	0,205,102
chr4	1060654	1061243	1	593	+	1060654	1061243	0,205,102
chr4	1060654	1061270	1	1	+	1060654	1061270	0,255,127
chr4	1060654	1061292	1	1	+	1060654	1061292	0,205,102
chr4	1060654	1061309	1	4	+	1060654	1061309	0,205,102
chr4	1060654	1061347	1	7	+	1060654	1061347	0,205,102
chr4	1060654	1061416	1	22	+	1060654	1061416	0,205,102
chr4	1060654	1063578	1	9	+	1060654	1063578	0,205,102
chr4	1060654	1063669	1	1	+	1060654	1063669	0,205,102
chr4	1060654	1064018	1	6	+	1060654	1064018	0,205,102
chr4	1060654	1064143	1	8737	+	1060654	1064143	16,78,139
chr4	1060654	1065124	1	1	+	1060654	1065124	0,205,102
chr4	1060654	1065831	1	284	+	1060654	1065831	0,205,102
chr4	1060654	1065900	1	1	+	1060654	1065900	0,205,102
chr4	1060688	1064143	1	1	+	1060688	1064143	0,255,127
chr4	1060736	1064143	1	1	+	1060736	1064143	0,255,127
chr4	1061259	1061380	1	1	+	1061259	1061380	0,255,127
chr4	1061323	1061499	1	1	+	1061323	1061499	0,205,102
chr4	106135	106387	1	2	+	106135	106387	0,205,102
chr4	1061423	1061546	1	1	+	1061423	1061546	0,255,127
chr4	1061476	1064143	1	2	+	1061476	1064143	0,205,102
chr4	1061523	1064143	1	3	+	1061523	1064143	0,205,102
chr4	1061535	1062020	1	1	+	1061535	1062020	0,255,127
chr4	1061691	1061856	1	1	+	1061691	1061856	0,205,102
chr4	1061691	1063578	1	1	+	1061691	1063578	0,205,102
chr4	1061691	1063669	1	8	+	1061691	1063669	0,205,102
chr4	1061691	1064143	1	109	+	1061691	1064143	0,205,102
chr4	1061708	1063753	1	1	+	1061708	1063753	0,255,127
chr4	1061729	1062118	1	2	+	1061729	1062118	0,255,127
chr4	1061744	1063669	1	1	+	1061744	1063669	0,205,102
chr4	1061874	1062030	1	3	+	1061874	1062030	0,205,102
chr4	1061900	1211570	2	2	+	1061900	1211570	0,255,127
chr4	1062033	1062189	1	1	+	1062033	1062189	0,255,127
chr4	106233	106387	1	2	+	106233	106387	0,205,102
chr4	1062571	1195064	1	1	+	1062571	1195064	0,205,102
chr4	1062930	1063156	1	1	+	1062930	1063156	0,255,127
chr4	1063037	1063232	1	2	+	1063037	1063232	0,255,127
chr4	1063105	1063477	1	1	+	1063105	1063477	0,255,127
chr4	1063118	1063294	1	1	+	1063118	1063294	0,255,127
chr4	1063194	1063565	1	1	+	1063194	1063565	0,255,127
chr4	1063200	1115933	1	1	+	1063200	1115933	0,255,127
chr4	1063228	1064873	1	2	+	1063228	1064873	0,255,127
chr4	106323	107788	1	1	+	106323	107788	0,205,102
chr4	1063236	1067648	1	1	+	1063236	1067648	0,255,127
chr4	1063255	1064143	1	1	+	1063255	1064143	0,205,102
chr4	1063277	1064935	1	1	+	1063277	1064935	0,255,127
chr4	1063321	1098589	1	1	+	1063321	1098589	0,205,102
chr4	1063341	1232016	1	1	+	1063341	1232016	0,255,127
chr4	1063379	1106263	1	1	+	1063379	1106263	0,255,127
chr4	1063379	1149825	1	1	+	1063379	1149825	0,255,127
chr4	1063379	1153853	1	1	+	1063379	1153853	0,255,127
chr4	1063409	1115886	1	1	+	1063409	1115886	0,255,127
chr4	1063426	1265391	1	2	+	1063426	1265391	0,255,127
chr4	1063443	1063561	1	1	+	1063443	1063561	0,255,127
chr4	1063543	1064143	1	20	+	1063543	1064143	0,205,102
chr4	1063581	1064143	1	3	+	1063581	1064143	0,205,102
chr4	1063694	1064018	1	2	+	1063694	1064018	0,205,102
chr4	1063694	1064143	1	1006	+	1063694	1064143	0,205,102
chr4	1063694	1065124	1	1	+	1063694	1065124	0,205,102
chr4	1063694	1065831	1	38	+	1063694	1065831	0,205,102
chr4	1063707	1064143	1	2	+	1063707	1064143	0,255,127
chr4	106372	107736	1	1	+	106372	107736	0,255,127
chr4	106375	106528	1051	22247	+	106375	106528	16,78,139
chr4	106375	106558	1	2	+	106375	106558	0,205,102
chr4	106375	107692	1	69	+	106375	107692	16,78,139
chr4	106375	107719	1	8	+	106375	107719	0,205,102
chr4	106375	107733	1	1	+	106375	107733	0,205,102
chr4	106375	115098	1	18	+	106375	115098	0,205,102
chr4	106379	106528	1	3	+	106379	106528	0,205,102
chr4	1063866	1115876	2	2	+	1063866	1115876	0,255,127
chr4	1063937	1064143	2	2	+	1063937	1064143	0,205,102
chr4	1063946	1064143	1	25	+	1063946	1064143	0,205,102
chr4	1064097	1065831	1	952	+	1064097	1065831	16,78,139
chr4	1064100	1065124	1	2	+	1064100	1065124	0,205,102
chr4	1064100	1065827	1	1	+	1064100	1065827	0,205,102
chr4	1064100	1065831	101	11092	+	1064100	1065831	16,78,139
chr4	1064111	1065831	1	1	+	1064111	1065831	0,255,127
chr4	106441	106574	1	1	+	106441	106574	0,255,127
chr4	1064693	1149710	1	2	+	1064693	1149710	0,255,127
chr4	1064827	1148359	1	1	+	1064827	1148359	0,255,127
chr4	1064897	1065831	1	2	+	1064897	1065831	0,205,102
chr4	106502	107686	1	4	+	106502	107686	0,255,127
chr4	1065036	1065831	1	4	+	1065036	1065831	0,205,102
chr4	106509	107658	1	1	+	106509	107658	0,205,102
chr4	106509	107663	1	30	+	106509	107663	0,205,102
chr4	106509	107692	10	9393	+	106509	107692	16,78,139
chr4	106509	107719	1	69	+	106509	107719	0,205,102
chr4	106509	107733	1	18	+	106509	107733	0,205,102
chr4	106509	115098	1	1	+	106509	115098	0,205,102
chr4	1065676	1065831	1	4	+	1065676	1065831	0,205,102
chr4	1065681	1065831	1	1	+	1065681	1065831	0,205,102
chr4	1065682	1065831	1	2	+	1065682	1065831	0,255,127
chr4	1065716	1065831	1	1	+	1065716	1065831	0,255,127
chr4	1065820	1067939	1	9	+	1065820	1067939	0,205,102
chr4	1065824	1065984	1	1	+	1065824	1065984	0,205,102
chr4	1065824	1066043	1	3	+	1065824	1066043	0,205,102
chr4	1065824	1067939	100	15098	+	1065824	1067939	16,78,139
chr4	1065830	1067945	1	1	+	1065830	1067945	0,255,127
chr4	1065840	1067939	1	1	+	1065840	1067939	0,205,102
chr4	1066041	1067369	1	2	+	1066041	1067369	0,205,102
chr4	1066143	1183844	1	1	+	1066143	1183844	0,255,127
chr4	1066431	1066630	1	1	+	1066431	1066630	0,255,127
chr4	1066452	1183893	1	1	+	1066452	1183893	0,255,127
chr4	1066502	1183731	1	2	+	1066502	1183731	0,255,127
chr4	1066513	1183726	1	1	+	1066513	1183726	0,255,127
chr4	1066545	1091087	1	1	+	1066545	1091087	0,255,127
chr4	1066568	1183779	2	2	+	1066568	1183779	0,255,127
chr4	1066597	1183491	1	1	+	1066597	1183491	0,255,127
chr4	1066693	1183491	1	1	+	1066693	1183491	0,255,127
chr4	1066710	1183508	1	1	+	1066710	1183508	0,255,127
chr4	1066761	1183462	1	1	+	1066761	1183462	0,255,127
chr4	1067243	1183041	1	1	+	1067243	1183041	0,255,127
chr4	1067347	1067939	1	8	+	1067347	1067939	0,205,102
chr4	1067613	1123538	1	1	+	1067613	1123538	0,255,127
chr4	1067920	1068128	1	4	+	1067920	1068128	0,205,102
chr4	1067925	1068391	1	1	+	1067925	1068391	0,255,127
chr4	1067966	1068128	18	10992	+	1067966	1068128	16,78,139
chr4	1068117	1068310	1	1	+	1068117	1068310	0,205,102
chr4	1068130	1068318	1	1	+	1068130	1068318	0,255,127
chr4	1068138	1068310	1	8	+	1068138	1068310	0,205,102
chr4	1068151	1068310	1021	17474	+	1068151	1068310	16,78,139
chr4	1068291	1068511	1	1	+	1068291	1068511	0,255,127
chr4	1068302	1068498	1	29	+	1068302	1068498	0,205,102
chr4	1068305	1068494	1	2	+	1068305	1068494	0,255,127
chr4	1068305	1068498	104	25316	+	1068305	1068498	16,78,139
chr4	1068305	1068501	1	2	+	1068305	1068501	0,205,102
chr4	1068332	1068498	1	1	+	1068332	1068498	0,205,102
chr4	1068724	1069179	10	2230	+	1068724	1069179	16,78,139
chr4	1068726	1069181	1	1	+	1068726	1069181	0,255,127
chr4	1069021	1069179	1	2	+	1069021	1069179	0,205,102
chr4	1069022	1069179	1	1	+	1069022	1069179	0,255,127
chr4	1069023	1069179	1	2	+	1069023	1069179	0,255,127
chr4	1069043	1069179	1	1	+	1069043	1069179	0,255,127
chr4	1069134	1069613	1	1	+	1069134	1069613	0,205,102
chr4	1069134	1069643	1	8	+	1069134	1069643	0,205,102
chr4	1069134	1069862	10	2478	+	1069134	1069862	16,78,139
chr4	1069516	1069836	1	1	+	1069516	1069836	0,255,127
chr4	1069562	1069862	1	1	+	1069562	1069862	0,255,127
chr4	1069603	1069862	1	2	+	1069603	1069862	0,205,102
chr4	1069620	1069874	1	1	+	1069620	1069874	0,255,127
chr4	1069697	1069862	1	1	+	1069697	1069862	0,255,127
chr4	1069699	1069862	1	16	+	1069699	1069862	0,205,102
chr4	1069713	1069862	1	1	+	1069713	1069862	0,255,127
chr4	1069715	1069862	1	6	+	1069715	1069862	0,205,102
chr4	1069737	1069862	1	1	+	1069737	1069862	0,255,127
chr4	1069811	1074335	2	2	+	1069811	1074335	0,255,127
chr4	1069822	1070973	1	4462	+	1069822	1070973	16,78,139
chr4	1070486	1070686	1	1	+	1070486	1070686	0,255,127
chr4	1070580	1115797	1	1	+	1070580	1115797	0,255,127
chr4	1070657	1211661	1	1	+	1070657	1211661	0,255,127
chr4	107069	107692	1	1	+	107069	107692	0,205,102
chr4	1070966	1071130	1	4	+	1070966	1071130	0,205,102
chr4	1070968	1071130	100	3058	+	1070968	1071130	24116205
chr4	1070973	1071130	1	1	+	1070973	1071130	0,255,127
chr4	1071185	1071350	1	1	+	1071185	1071350	0,205,102
chr4	1071185	1071357	1	38	+	1071185	1071357	0,205,102
chr4	1071185	1071365	1	46	+	1071185	1071365	0,205,102
chr4	1071185	1071369	1	632	+	1071185	1071369	16,78,139
chr4	1071185	1072104	1	40	+	1071185	1072104	16,78,139
chr4	1071185	1073131	1	2	+	1071185	1073131	0,205,102
chr4	1071185	1073419	1	5	+	1071185	1073419	0,205,102
chr4	1071185	1074173	1	904	+	1071185	1074173	16,78,139
chr4	1071185	1074319	1	9	+	1071185	1074319	16,78,139
chr4	1071185	1074329	1	1	+	1071185	1074329	0,205,102
chr4	1071185	1074378	1	2	+	1071185	1074378	0,205,102
chr4	1071185	1074534	1	1	+	1071185	1074534	0,205,102
chr4	1071185	1074864	1	1	+	1071185	1074864	0,205,102
chr4	1071185	1077511	1	6	+	1071185	1077511	0,205,102
chr4	1071433	1074173	1	1	+	1071433	1074173	0,205,102
chr4	1071438	1071934	1	3	+	1071438	1071934	0,205,102
chr4	1071438	1072018	1	8	+	1071438	1072018	0,205,102
chr4	1071438	1072104	1	5	+	1071438	1072104	0,205,102
chr4	1071438	1073419	1	1	+	1071438	1073419	0,205,102
chr4	1071438	1074173	1	11	+	1071438	1074173	0,205,102
chr4	1071438	1074378	1	1	+	1071438	1074378	0,205,102
chr4	1071438	1074382	1	1	+	1071438	1074382	0,205,102
chr4	1071460	1071934	1	1	+	1071460	1071934	0,205,102
chr4	1071460	1074173	1	3	+	1071460	1074173	0,205,102
chr4	1071474	1071692	1	1	+	1071474	1071692	0,205,102
chr4	1071474	1074173	1	2	+	1071474	1074173	0,205,102
chr4	1071481	1074173	1	1	+	1071481	1074173	0,255,127
chr4	1071481	1074177	1	1	+	1071481	1074177	0,255,127
chr4	1071483	1074592	4	4	+	1071483	1074592	0,255,127
chr4	1071489	1071692	1	2	+	1071489	1071692	0,255,127
chr4	1071489	1071934	1	6	+	1071489	1071934	0,255,127
chr4	1071489	1072018	2	2	+	1071489	1072018	0,255,127
chr4	1071489	1072104	1	1	+	1071489	1072104	0,255,127
chr4	1071489	1072874	1	1	+	1071489	1072874	0,255,127
chr4	1071489	1074173	1	9	+	1071489	1074173	0,255,127
chr4	1071499	1073419	1	1	+	1071499	1073419	0,255,127
chr4	1071514	1074803	2	2	+	1071514	1074803	0,205,102
chr4	1071518	1071692	1	3	+	1071518	1071692	0,205,102
chr4	1071518	1071717	1	2	+	1071518	1071717	0,205,102
chr4	1071538	1211650	1	1	+	1071538	1211650	0,255,127
chr4	1071547	1071680	1	1	+	1071547	1071680	0,255,127
chr4	1071600	1072071	1	1	+	1071600	1072071	0,255,127
chr4	1071624	1071863	1	3	+	1071624	1071863	0,205,102
chr4	1071624	1071934	1	8	+	1071624	1071934	0,205,102
chr4	1071636	1071934	1	9	+	1071636	1071934	0,205,102
chr4	1071875	1072063	1	1	+	1071875	1072063	0,255,127
chr4	1071883	1072071	1	1	+	1071883	1072071	0,255,127
chr4	1071929	1072104	1	5	+	1071929	1072104	0,205,102
chr4	1072389	1148408	2	2	+	1072389	1148408	0,255,127
chr4	1072830	1073103	1	1	+	1072830	1073103	0,255,127
chr4	1073051	1073419	1	1	+	1073051	1073419	0,205,102
chr4	1073051	1074173	1	1	+	1073051	1074173	0,205,102
chr4	1073378	1074173	1	1	+	1073378	1074173	0,205,102
chr4	1073620	1074605	1	1	+	1073620	1074605	0,205,102
chr4	1073956	1074173	1	1	+	1073956	1074173	0,205,102
chr4	1074000	1074173	1	2	+	1074000	1074173	0,255,127
chr4	1074377	1074605	1	34	+	1074377	1074605	0,205,102
chr4	1074377	1078171	1	2	+	1074377	1078171	0,205,102
chr4	1074473	1074803	1	6	+	1074473	1074803	0,205,102
chr4	1074473	1078171	2	2	+	1074473	1078171	0,205,102
chr4	1074603	1074864	1	1	+	1074603	1074864	0,205,102
chr4	1074603	1074891	1	4	+	1074603	1074891	0,205,102
chr4	1074603	1077511	1	2	+	1074603	1077511	0,205,102
chr4	1074767	1078171	1	1	+	1074767	1078171	0,205,102
chr4	1074767	1086531	1	1	+	1074767	1086531	0,205,102
chr4	1075728	1078171	1	1	+	1075728	1078171	0,205,102
chr4	1077204	1078171	1	5	+	1077204	1078171	0,205,102
chr4	107742	108913	1	4	+	107742	108913	0,205,102
chr4	107742	109973	1	2	+	107742	109973	0,205,102
chr4	107742	110267	1	2	+	107742	110267	0,205,102
chr4	107742	110495	1	50	+	107742	110495	0,205,102
chr4	107742	111353	1	1	+	107742	111353	0,205,102
chr4	107742	114788	1	12	+	107742	114788	0,205,102
chr4	107742	114813	1	4	+	107742	114813	0,205,102
chr4	107742	114840	2	2	+	107742	114840	0,205,102
chr4	107742	115098	10	2240	+	107742	115098	16,78,139
chr4	107742	115109	1	1	+	107742	115109	0,205,102
chr4	107747	107915	1	1	+	107747	107915	0,205,102
chr4	1078132	1078329	1	16	+	1078132	1078329	0,205,102
chr4	1078148	1078308	10	3732	+	1078148	1078308	16,78,139
chr4	1078148	1078313	1	77	+	1078148	1078313	0,205,102
chr4	1078148	1078315	1	2	+	1078148	1078315	0,205,102
chr4	1078148	1078322	1	1	+	1078148	1078322	0,205,102
chr4	1078298	1078482	1	2	+	1078298	1078482	0,205,102
chr4	1078329	1078482	1	2078	+	1078329	1078482	16,78,139
chr4	1078593	1078885	1	1	+	1078593	1078885	16,78,139
chr4	1078615	1078885	1	65	+	1078615	1078885	16,78,139
chr4	1078635	1078885	1	2	+	1078635	1078885	0,205,102
chr4	1078727	1078885	1	61	+	1078727	1078885	16,78,139
chr4	1078731	1078885	1	1388	+	1078731	1078885	16,78,139
chr4	1079022	1079781	1	14	+	1079022	1079781	0,255,127
chr4	1079080	1079776	12	4428	+	1079080	1079776	16,78,139
chr4	1079080	1079781	1	37	+	1079080	1079781	0,255,127
chr4	1079080	1080094	1	17	+	1079080	1080094	0,205,102
chr4	1079080	1081088	1	1	+	1079080	1081088	0,205,102
chr4	1079739	1079917	1	1	+	1079739	1079917	0,205,102
chr4	1079739	1080094	1	1	+	1079739	1080094	0,205,102
chr4	1079742	1156214	1	1	+	1079742	1156214	0,205,102
chr4	1079852	1079993	1	1	+	1079852	1079993	0,255,127
chr4	1079864	1080094	10	2287	+	1079864	1080094	16,78,139
chr4	1079895	1080094	1	14	+	1079895	1080094	0,205,102
chr4	1079908	1080094	1	90	+	1079908	1080094	0,205,102
chr4	1079922	1080094	1	1	+	1079922	1080094	0,255,127
chr4	1079927	1080094	10	3564	+	1079927	1080094	16,78,139
chr4	1079929	1080094	1	1	+	1079929	1080094	0,255,127
chr4	1079933	1080094	1	1	+	1079933	1080094	0,255,127
chr4	1079934	1080094	1	1	+	1079934	1080094	0,255,127
chr4	1080084	1083711	1	1	+	1080084	1083711	0,205,102
chr4	1080150	1080460	1	1	+	1080150	1080460	0,205,102
chr4	1080212	1081243	1	1	+	1080212	1081243	0,255,127
chr4	1080398	1081088	1	1	+	1080398	1081088	0,205,102
chr4	1080412	1080797	1	8	+	1080412	1080797	0,205,102
chr4	1080412	1081088	10	6602	+	1080412	1081088	16,78,139
chr4	1080412	1081168	1	11	+	1080412	1081168	0,205,102
chr4	1080412	1081172	1	1	+	1080412	1081172	0,255,127
chr4	1080412	1081416	1	3	+	1080412	1081416	0,205,102
chr4	1080412	1081448	1	2	+	1080412	1081448	16,78,139
chr4	1080412	1081639	1	4	+	1080412	1081639	0,205,102
chr4	1080412	1083444	1	1	+	1080412	1083444	0,205,102
chr4	1080412	1083767	2	2	+	1080412	1083767	0,205,102
chr4	1080412	1084920	1	103	+	1080412	1084920	0,205,102
chr4	1080412	1105289	1	1	+	1080412	1105289	0,205,102
chr4	1080417	1081093	1	4	+	1080417	1081093	0,255,127
chr4	1080434	1081088	1	2	+	1080434	1081088	0,205,102
chr4	1080921	1081088	1	1	+	1080921	1081088	0,205,102
chr4	1081210	1081414	1	16	+	1081210	1081414	16,78,139
chr4	1081210	1081416	1	198	+	1081210	1081416	16,78,139
chr4	1081210	1081448	1	5	+	1081210	1081448	0,205,102
chr4	1081210	1081639	1	33	+	1081210	1081639	0,205,102
chr4	1081210	1083277	1	4	+	1081210	1083277	0,205,102
chr4	1081210	1083444	1	1	+	1081210	1083444	0,205,102
chr4	1081210	1083767	1	2	+	1081210	1083767	0,205,102
chr4	1081210	1084920	1	48	+	1081210	1084920	0,205,102
chr4	1081213	1081416	1	1	+	1081213	1081416	0,255,127
chr4	1081213	1083277	1	1	+	1081213	1083277	0,255,127
chr4	1081213	1084920	1	1	+	1081213	1084920	0,255,127
chr4	1081216	1081416	1	1	+	1081216	1081416	0,255,127
chr4	1081229	1081414	1	1	+	1081229	1081414	16,78,139
chr4	1081229	1081416	1	14	+	1081229	1081416	16,78,139
chr4	1081229	1081639	1	4	+	1081229	1081639	0,205,102
chr4	1081229	1084920	1	2	+	1081229	1084920	0,205,102
chr4	1081235	1081414	1	4	+	1081235	1081414	16,78,139
chr4	1081235	1081416	1	19	+	1081235	1081416	16,78,139
chr4	1081606	1083277	2	2	+	1081606	1083277	0,205,102
chr4	1081652	1083277	1	2	+	1081652	1083277	0,205,102
chr4	1081707	1085596	1	2	+	1081707	1085596	0,205,102
chr4	1081712	1085596	1	2	+	1081712	1085596	0,205,102
chr4	1081825	1082099	1	1	+	1081825	1082099	0,205,102
chr4	1081825	1085526	1	1	+	1081825	1085526	0,205,102
chr4	1081825	1085552	1	1	+	1081825	1085552	0,205,102
chr4	1082082	1085596	1	1	+	1082082	1085596	0,205,102
chr4	1083293	1083444	1	8	+	1083293	1083444	0,205,102
chr4	1083473	1083663	1	1	+	1083473	1083663	0,205,102
chr4	1083495	1083648	2	2	+	1083495	1083648	0,205,102
chr4	1083495	1083687	1	25	+	1083495	1083687	0,205,102
chr4	1083504	1084920	1	1	+	1083504	1084920	0,205,102
chr4	1084483	1085596	1	1	+	1084483	1085596	0,205,102
chr4	1084543	1085526	1	1	+	1084543	1085526	0,205,102
chr4	1084706	1084920	1	1	+	1084706	1084920	0,205,102
chr4	1084773	1084920	1	6	+	1084773	1084920	0,205,102
chr4	1084773	1086642	1	1	+	1084773	1086642	0,205,102
chr4	1084957	1085378	1	1	+	1084957	1085378	0,205,102
chr4	1085103	1085297	1	1	+	1085103	1085297	0,205,102
chr4	1085220	1085759	1	3	+	1085220	1085759	0,205,102
chr4	1085430	1085596	1	33	+	1085430	1085596	16,78,139
chr4	1085430	1085759	1	1	+	1085430	1085759	0,205,102
chr4	1085536	1085786	1	1	+	1085536	1085786	0,255,127
chr4	1085561	1085797	1	1	+	1085561	1085797	0,255,127
chr4	1085565	1085797	1	2	+	1085565	1085797	0,255,127
chr4	1085584	1087600	1	1	+	1085584	1087600	0,255,127
chr4	1085586	1085759	2	2	+	1085586	1085759	0,205,102
chr4	1085586	1101907	1	1	+	1085586	1101907	0,255,127
chr4	1085588	1085759	1	20	+	1085588	1085759	0,205,102
chr4	1085592	1085759	1	5379	+	1085592	1085759	16,78,139
chr4	1085592	1085859	1	1	+	1085592	1085859	0,255,127
chr4	1085598	1085759	1	243441	+	1085598	1085759	16,78,139
chr4	1085598	1085771	1	2	+	1085598	1085771	0,205,102
chr4	1085598	1087710	1	1	+	1085598	1087710	0,205,102
chr4	1085598	1089005	1	1	+	1085598	1089005	0,205,102
chr4	1085753	1086525	1	1	+	1085753	1086525	0,255,127
chr4	1085755	1086531	1	63	+	1085755	1086531	0,255,127
chr4	1085759	1085923	1	3	+	1085759	1085923	0,205,102
chr4	1085759	1086188	1	1	+	1085759	1086188	0,205,102
chr4	1085759	1086335	1	1	+	1085759	1086335	0,205,102
chr4	1085759	1086510	1	1	+	1085759	1086510	0,255,127
chr4	1085759	1086531	1	252708	+	1085759	1086531	16,78,139
chr4	1085759	1086533	2	2	+	1085759	1086533	0,255,127
chr4	1085759	1086549	1	8	+	1085759	1086549	0,205,102
chr4	1085759	1087959	1	1	+	1085759	1087959	0,205,102
chr4	1085759	1112934	1	2	+	1085759	1112934	0,205,102
chr4	1086300	1086531	1	4	+	1086300	1086531	0,205,102
chr4	1086353	1086531	1	1	+	1086353	1086531	0,255,127
chr4	1086459	1086613	1	28	+	1086459	1086613	0,255,127
chr4	1086461	1086615	1	247881	+	1086461	1086615	16,78,139
chr4	1086461	1086618	1	2	+	1086461	1086618	0,255,127
chr4	1086461	1086635	1	7	+	1086461	1086635	0,205,102
chr4	1086461	1086673	1	7	+	1086461	1086673	0,205,102
chr4	1086465	1086615	1	2	+	1086465	1086615	0,205,102
chr4	1086479	1086635	1	4	+	1086479	1086635	0,205,102
chr4	1086545	1092520	1	1	+	1086545	1092520	0,255,127
chr4	1086574	1086752	1	1	+	1086574	1086752	0,255,127
chr4	1086576	1086850	1	1	+	1086576	1086850	0,255,127
chr4	1086617	1087100	1	3	+	1086617	1087100	0,255,127
chr4	1086634	1087115	1	1	+	1086634	1087115	0,255,127
chr4	1086644	1095572	2	2	+	1086644	1095572	0,205,102
chr4	1086681	1087020	1	1	+	1086681	1087020	0,255,127
chr4	1086687	1096291	1	2	+	1086687	1096291	0,205,102
chr4	1086703	1096291	1	1	+	1086703	1096291	0,205,102
chr4	1086736	1087022	1	1	+	1086736	1087022	0,255,127
chr4	1086748	1091904	1	1	+	1086748	1091904	0,255,127
chr4	1086758	1087234	1	1	+	1086758	1087234	0,255,127
chr4	1086775	1086944	1	12	+	1086775	1086944	0,205,102
chr4	1086775	1093836	1	1	+	1086775	1093836	0,205,102
chr4	1086775	1096291	1	20	+	1086775	1096291	0,205,102
chr4	1086775	1112934	2	2	+	1086775	1112934	0,205,102
chr4	1086820	1087228	1	1	+	1086820	1087228	0,255,127
chr4	1086843	1087064	1	1	+	1086843	1087064	0,255,127
chr4	1086887	1087073	1	1	+	1086887	1087073	0,255,127
chr4	1086887	1087321	1	2	+	1086887	1087321	0,255,127
chr4	1086892	1087057	1	1	+	1086892	1087057	0,255,127
chr4	1086898	1094022	1	1	+	1086898	1094022	0,205,102
chr4	1086937	1087100	1	4	+	1086937	1087100	0,205,102
chr4	1086941	1087143	2	2	+	1086941	1087143	0,255,127
chr4	1086950	1087137	1	2	+	1086950	1087137	0,255,127
chr4	1086980	1094742	1	1	+	1086980	1094742	0,255,127
chr4	1087000	1087462	1	1	+	1087000	1087462	0,255,127
chr4	1087007	1087139	1	7	+	1087007	1087139	0,255,127
chr4	1087015	1087197	1	1	+	1087015	1087197	0,255,127
chr4	1087017	1087200	2	2	+	1087017	1087200	0,255,127
chr4	1087020	1087167	1	1	+	1087020	1087167	0,255,127
chr4	1087022	1087169	1	1	+	1087022	1087169	0,255,127
chr4	1087022	1087192	1	1	+	1087022	1087192	0,255,127
chr4	1087022	1087325	1	1	+	1087022	1087325	0,255,127
chr4	1087023	1188447	1	1	+	1087023	1188447	0,255,127
chr4	1087027	1087300	2	2	+	1087027	1087300	0,255,127
chr4	1087028	1087178	1	2	+	1087028	1087178	0,255,127
chr4	1087028	1087331	1	1	+	1087028	1087331	0,255,127
chr4	1087045	1087228	2	4	+	1087045	1087228	0,255,127
chr4	1087046	1087205	1	1	+	1087046	1087205	0,255,127
chr4	1087055	1087187	1	1	+	1087055	1087187	0,255,127
chr4	1087055	1087200	1	2	+	1087055	1087200	0,255,127
chr4	1087057	1087202	2	2	+	1087057	1087202	0,205,102
chr4	1087057	1087217	1	1	+	1087057	1087217	0,255,127
chr4	1087069	1087325	1	3	+	1087069	1087325	0,255,127
chr4	1087086	1087308	1	1	+	1087086	1087308	0,255,127
chr4	1087089	1087335	1	1	+	1087089	1087335	0,255,127
chr4	1087094	1087224	1	1	+	1087094	1087224	0,255,127
chr4	1087102	1087302	1	1	+	1087102	1087302	0,255,127
chr4	1087102	1087384	1	1	+	1087102	1087384	0,255,127
chr4	1087104	1087253	1	1	+	1087104	1087253	0,255,127
chr4	1087105	1095264	1	1	+	1087105	1095264	0,255,127
chr4	1087117	1087253	1	4	+	1087117	1087253	0,255,127
chr4	1087117	1087284	1	1	+	1087117	1087284	0,205,102
chr4	1087117	1087344	1	6	+	1087117	1087344	0,255,127
chr4	1087117	1087366	1	1	+	1087117	1087366	0,255,127
chr4	1087118	1087310	1	1	+	1087118	1087310	0,255,127
chr4	1087122	1087325	1	2	+	1087122	1087325	0,255,127
chr4	1087123	1087408	1	2	+	1087123	1087408	0,255,127
chr4	1087127	1087377	1	14	+	1087127	1087377	0,255,127
chr4	1087133	1087291	1	10	+	1087133	1087291	0,255,127
chr4	1087225	1091187	1	1	+	1087225	1091187	0,255,127
chr4	1087225	1264315	1	1	+	1087225	1264315	0,255,127
chr4	1087235	1087377	1	2	+	1087235	1087377	0,255,127
chr4	1087254	1087377	1	2	+	1087254	1087377	0,255,127
chr4	1087277	1087600	1	1	+	1087277	1087600	0,255,127
chr4	1087277	1087714	1	2	+	1087277	1087714	0,255,127
chr4	1087284	1150796	1	1	+	1087284	1150796	0,205,102
chr4	1087301	1087743	1	1	+	1087301	1087743	0,255,127
chr4	1087306	1087712	1	56	+	1087306	1087712	0,255,127
chr4	1087309	1087714	1	5	+	1087309	1087714	0,205,102
chr4	1087325	1087509	1	3	+	1087325	1087509	0,255,127
chr4	1087370	1087839	1	3	+	1087370	1087839	0,255,127
chr4	1087382	1087781	1	1	+	1087382	1087781	0,255,127
chr4	1087568	1194886	1	1	+	1087568	1194886	0,255,127
chr4	1087570	1087947	1	1	+	1087570	1087947	0,255,127
chr4	1087624	1088487	1	1	+	1087624	1088487	0,255,127
chr4	1087676	1087818	1	1	+	1087676	1087818	0,205,102
chr4	1087847	1088589	1	1	+	1087847	1088589	0,255,127
chr4	1087982	1088430	1	1	+	1087982	1088430	0,255,127
chr4	1088025	1088421	1	1	+	1088025	1088421	0,255,127
chr4	1088062	1088194	1	1	+	1088062	1088194	0,255,127
chr4	1088071	1088660	1	1	+	1088071	1088660	0,255,127
chr4	1088075	1092690	1	1	+	1088075	1092690	0,255,127
chr4	1088107	1088485	1	1	+	1088107	1088485	0,255,127
chr4	1088169	1088540	1	1	+	1088169	1088540	0,255,127
chr4	1088173	1088296	1	1	+	1088173	1088296	0,255,127
chr4	1088267	1088598	1	1	+	1088267	1088598	0,255,127
chr4	1088273	1088610	1	1	+	1088273	1088610	0,255,127
chr4	1088274	1088605	1	3	+	1088274	1088605	0,255,127
chr4	1088404	1096633	1	5	+	1088404	1096633	0,255,127
chr4	1088433	1088576	1	1	+	1088433	1088576	0,255,127
chr4	1088442	1088567	1	1	+	1088442	1088567	0,255,127
chr4	1088456	1347526	1	1	+	1088456	1347526	0,255,127
chr4	1088467	1088659	1	1	+	1088467	1088659	0,255,127
chr4	1088468	1090304	1	1	+	1088468	1090304	0,255,127
chr4	1088470	1088653	1	6	+	1088470	1088653	0,255,127
chr4	1088476	1088594	1	1	+	1088476	1088594	0,255,127
chr4	1088489	1350208	1	3	+	1088489	1350208	0,255,127
chr4	1088498	1088632	1	1	+	1088498	1088632	0,255,127
chr4	1088504	1088891	1	2	+	1088504	1088891	0,255,127
chr4	1088526	1088696	1	1	+	1088526	1088696	0,255,127
chr4	1088534	1088702	1	1	+	1088534	1088702	0,255,127
chr4	1088544	1088795	1	1	+	1088544	1088795	0,255,127
chr4	1088544	1094156	1	1	+	1088544	1094156	0,255,127
chr4	1088551	1088669	1	2	+	1088551	1088669	0,255,127
chr4	1088562	1088816	1	17	+	1088562	1088816	0,255,127
chr4	1088562	1096189	1	1	+	1088562	1096189	0,255,127
chr4	1088564	1092858	2	2	+	1088564	1092858	0,255,127
chr4	1088569	1088720	1	1	+	1088569	1088720	0,255,127
chr4	1088571	1096608	1	1	+	1088571	1096608	0,255,127
chr4	1088573	1091089	1	1	+	1088573	1091089	0,255,127
chr4	1088602	1088788	1	1	+	1088602	1088788	0,255,127
chr4	1088613	1089436	1	1	+	1088613	1089436	0,255,127
chr4	1088613	1090900	1	1	+	1088613	1090900	0,255,127
chr4	1088627	1344356	1	1	+	1088627	1344356	0,255,127
chr4	1088716	1088845	1	2	+	1088716	1088845	0,255,127
chr4	108873	115098	1	1	+	108873	115098	0,205,102
chr4	1088844	1089018	1	1	+	1088844	1089018	0,255,127
chr4	1088959	1089314	1	1	+	1088959	1089314	0,255,127
chr4	1088985	1089121	1	1	+	1088985	1089121	0,255,127
chr4	1088987	1089447	2	2	+	1088987	1089447	0,255,127
chr4	1089067	1089420	1	1	+	1089067	1089420	0,255,127
chr4	1089079	1089227	1	2	+	1089079	1089227	0,205,102
chr4	108909	115098	1	1	+	108909	115098	0,205,102
chr4	1089101	1089229	1	1	+	1089101	1089229	0,255,127
chr4	1089191	1089723	1	1	+	1089191	1089723	0,255,127
chr4	1089191	1089740	1	3	+	1089191	1089740	0,255,127
chr4	1089373	1089492	1	1	+	1089373	1089492	0,255,127
chr4	1089446	1089611	1	3	+	1089446	1089611	0,255,127
chr4	108947	114813	1	1	+	108947	114813	0,205,102
chr4	1089487	1089698	1	1	+	1089487	1089698	0,255,127
chr4	1089612	1090375	1	1	+	1089612	1090375	0,255,127
chr4	1089641	1089778	1	16	+	1089641	1089778	0,255,127
chr4	1089646	1089826	1	1	+	1089646	1089826	0,255,127
chr4	1089646	1090030	1	1	+	1089646	1090030	0,255,127
chr4	1089646	1090993	1	1	+	1089646	1090993	0,255,127
chr4	1089651	1091198	1	1	+	1089651	1091198	0,205,102
chr4	1089704	1089825	1	1	+	1089704	1089825	0,255,127
chr4	1089716	1092868	2	2	+	1089716	1092868	0,255,127
chr4	1089716	1093690	1	1	+	1089716	1093690	0,255,127
chr4	1089770	1091087	1	1	+	1089770	1091087	0,255,127
chr4	1089773	1090737	1	1	+	1089773	1090737	0,255,127
chr4	1089775	1091968	1	1	+	1089775	1091968	0,255,127
chr4	1089853	1090284	1	1	+	1089853	1090284	0,205,102
chr4	1089873	1090693	1	2	+	1089873	1090693	0,205,102
chr4	1089941	1090251	1	1	+	1089941	1090251	0,255,127
chr4	1089947	1090487	1	1	+	1089947	1090487	0,255,127
chr4	1089952	1090274	1	1	+	1089952	1090274	0,255,127
chr4	1090088	1091055	1	1	+	1090088	1091055	0,255,127
chr4	1090139	1090653	1	3	+	1090139	1090653	0,255,127
chr4	1090141	1090331	1	1	+	1090141	1090331	0,255,127
chr4	1090148	1090429	1	1	+	1090148	1090429	0,255,127
chr4	1090150	1090339	2	2	+	1090150	1090339	0,255,127
chr4	1090156	1091171	1	1	+	1090156	1091171	0,255,127
chr4	1090192	1090430	1	1	+	1090192	1090430	0,255,127
chr4	1090195	1090887	1	1	+	1090195	1090887	0,255,127
chr4	1090203	1090705	1	1	+	1090203	1090705	0,255,127
chr4	1090210	1090325	1	1	+	1090210	1090325	0,255,127
chr4	1090219	1090582	1	1	+	1090219	1090582	0,255,127
chr4	1090219	1090993	1	1	+	1090219	1090993	0,255,127
chr4	1090225	1090633	1	1	+	1090225	1090633	0,255,127
chr4	1090225	1091121	1	1	+	1090225	1091121	0,255,127
chr4	1090231	1090496	1	3	+	1090231	1090496	0,255,127
chr4	1090237	1090601	1	1	+	1090237	1090601	0,255,127
chr4	1090238	1090469	2	2	+	1090238	1090469	0,255,127
chr4	1090238	1090522	2	2	+	1090238	1090522	0,255,127
chr4	1090248	1091018	1	1	+	1090248	1091018	0,255,127
chr4	1090255	1090815	1	2	+	1090255	1090815	0,255,127
chr4	1090255	1091009	1	1	+	1090255	1091009	0,255,127
chr4	1090260	1090375	1	1	+	1090260	1090375	0,255,127
chr4	1090267	1090673	1	1	+	1090267	1090673	0,255,127
chr4	1090283	1090640	1	4	+	1090283	1090640	0,255,127
chr4	1090290	1090647	1	2	+	1090290	1090647	0,255,127
chr4	1090297	1090415	1	1	+	1090297	1090415	0,255,127
chr4	1090318	1090590	1	1	+	1090318	1090590	0,255,127
chr4	1090330	1090449	1	1	+	1090330	1090449	0,255,127
chr4	1090330	1090469	1	1	+	1090330	1090469	0,255,127
chr4	1090330	1090603	1	1	+	1090330	1090603	0,255,127
chr4	1090356	1090474	1	1	+	1090356	1090474	0,255,127
chr4	1090358	1090475	1	1	+	1090358	1090475	0,205,102
chr4	1090364	1090480	1	2	+	1090364	1090480	0,255,127
chr4	1090381	1090613	1	1	+	1090381	1090613	0,205,102
chr4	1090413	1090530	1	1	+	1090413	1090530	0,255,127
chr4	1090430	1090595	1	1	+	1090430	1090595	0,255,127
chr4	1090430	1090645	1	1	+	1090430	1090645	0,255,127
chr4	1090432	1090590	1	2	+	1090432	1090590	0,255,127
chr4	1090454	1090619	1	37	+	1090454	1090619	0,255,127
chr4	1090475	1090640	2	2	+	1090475	1090640	0,255,127
chr4	1090481	1094154	1	1	+	1090481	1094154	0,255,127
chr4	1090490	1091187	1	3	+	1090490	1091187	0,255,127
chr4	1090495	1090629	1	1	+	1090495	1090629	0,255,127
chr4	1090498	1090810	1	1	+	1090498	1090810	0,255,127
chr4	1090515	1091066	1	1	+	1090515	1091066	0,255,127
chr4	1090519	1090661	1	1	+	1090519	1090661	0,255,127
chr4	1090540	1151952	1	1	+	1090540	1151952	0,255,127
chr4	1090573	1090829	1	1	+	1090573	1090829	0,255,127
chr4	1090573	1091135	1	1	+	1090573	1091135	0,255,127
chr4	1090593	1090849	1	1	+	1090593	1090849	0,205,102
chr4	1090593	1091278	1	1	+	1090593	1091278	0,205,102
chr4	1090628	1090744	1	1	+	1090628	1090744	0,255,127
chr4	1090658	1091231	1	1	+	1090658	1091231	0,255,127
chr4	1090663	1092677	1	1	+	1090663	1092677	0,255,127
chr4	1090671	1090810	1	1	+	1090671	1090810	0,255,127
chr4	1090676	1090814	1	1	+	1090676	1090814	0,255,127
chr4	1090685	1091267	1	2	+	1090685	1091267	0,255,127
chr4	1090687	1091269	1	1	+	1090687	1091269	0,255,127
chr4	1090694	1091064	1	3	+	1090694	1091064	0,255,127
chr4	1090694	1091171	1	1	+	1090694	1091171	0,255,127
chr4	1090698	1091069	1	1	+	1090698	1091069	0,255,127
chr4	1090698	1091191	3	3	+	1090698	1091191	0,255,127
chr4	1090715	1090950	1	1	+	1090715	1090950	0,255,127
chr4	1090724	1091082	1	8	+	1090724	1091082	0,255,127
chr4	1090729	1090893	2	2	+	1090729	1090893	0,255,127
chr4	1090739	1090855	1	1	+	1090739	1090855	0,255,127
chr4	1090757	1091267	1	1	+	1090757	1091267	0,255,127
chr4	1090757	1195299	1	1	+	1090757	1195299	0,255,127
chr4	1090767	1091269	1	2	+	1090767	1091269	0,255,127
chr4	1090780	1091007	3	3	+	1090780	1091007	0,255,127
chr4	1090785	1090911	1	1	+	1090785	1090911	0,255,127
chr4	1090798	1091250	1	1	+	1090798	1091250	0,255,127
chr4	1090817	1090956	1	1	+	1090817	1090956	0,255,127
chr4	1090855	1090987	1	1	+	1090855	1090987	0,255,127
chr4	1090855	1091191	1	1	+	1090855	1091191	0,255,127
chr4	1090893	1091061	1	1	+	1090893	1091061	0,255,127
chr4	1090893	1091171	1	1	+	1090893	1091171	0,255,127
chr4	1090896	1091427	1	1	+	1090896	1091427	0,205,102
chr4	1090909	1091024	2	2	+	1090909	1091024	0,255,127
chr4	1090909	1091390	1	3	+	1090909	1091390	0,255,127
chr4	1090955	1095199	1	1	+	1090955	1095199	0,255,127
chr4	1090968	1091191	1	1	+	1090968	1091191	0,255,127
chr4	1090971	1091552	1	1	+	1090971	1091552	0,255,127
chr4	1090979	1091373	3	3	+	1090979	1091373	0,255,127
chr4	1090987	1091818	1	1	+	1090987	1091818	0,255,127
chr4	1090987	1091843	1	1	+	1090987	1091843	0,255,127
chr4	1090994	1091147	1	1	+	1090994	1091147	0,255,127
chr4	1090994	1091675	1	1	+	1090994	1091675	0,255,127
chr4	1090999	1091292	1	1	+	1090999	1091292	0,255,127
chr4	1091004	1091309	1	1	+	1091004	1091309	0,255,127
chr4	1091018	1091850	1	1	+	1091018	1091850	0,255,127
chr4	1091029	1091192	1	1	+	1091029	1091192	0,255,127
chr4	1091036	1091223	1	3	+	1091036	1091223	0,255,127
chr4	1091039	1091545	1	1	+	1091039	1091545	0,255,127
chr4	1091060	1091217	1	3	+	1091060	1091217	0,255,127
chr4	1091065	1091603	1	1	+	1091065	1091603	0,255,127
chr4	1091072	1091233	1	1	+	1091072	1091233	0,255,127
chr4	1091072	1091283	1	3	+	1091072	1091283	0,255,127
chr4	1091075	1091256	1	1	+	1091075	1091256	0,255,127
chr4	1091105	1091309	1	1	+	1091105	1091309	0,255,127
chr4	1091114	1091262	2	2	+	1091114	1091262	0,255,127
chr4	1091123	1091388	1	1	+	1091123	1091388	0,255,127
chr4	1091138	1091269	2	2	+	1091138	1091269	0,255,127
chr4	1091144	1091446	1	1	+	1091144	1091446	0,255,127
chr4	1091147	1091284	1	1	+	1091147	1091284	0,255,127
chr4	1091161	1091402	1	1	+	1091161	1091402	0,255,127
chr4	1091161	1095201	1	1	+	1091161	1095201	0,205,102
chr4	1091162	1091278	1	1	+	1091162	1091278	0,255,127
chr4	1091165	1091418	1	1	+	1091165	1091418	0,255,127
chr4	1091165	1091562	1	3	+	1091165	1091562	0,255,127
chr4	1091184	1091370	1	1	+	1091184	1091370	0,255,127
chr4	1091221	1091362	1	1	+	1091221	1091362	0,255,127
chr4	1091221	1091774	1	1	+	1091221	1091774	0,255,127
chr4	1091223	1092008	1	1	+	1091223	1092008	0,255,127
chr4	1091225	1092454	2	2	+	1091225	1092454	0,255,127
chr4	1091238	1091362	1	1	+	1091238	1091362	0,255,127
chr4	1091245	1091952	1	1	+	1091245	1091952	0,255,127
chr4	1091252	1091390	1	4	+	1091252	1091390	0,255,127
chr4	1091265	1091774	1	19	+	1091265	1091774	0,255,127
chr4	1091270	1095327	1	1	+	1091270	1095327	0,255,127
chr4	1091279	1091774	1	2	+	1091279	1091774	0,255,127
chr4	1091279	1091775	1	2	+	1091279	1091775	0,255,127
chr4	1091290	1091441	1	1	+	1091290	1091441	0,255,127
chr4	1091290	1091774	1	1	+	1091290	1091774	0,255,127
chr4	1091333	1111768	1	1	+	1091333	1111768	0,205,102
chr4	1091377	1091774	1	1	+	1091377	1091774	0,255,127
chr4	1091389	1091531	1	1	+	1091389	1091531	0,255,127
chr4	1091396	1091553	1	5	+	1091396	1091553	0,205,102
chr4	1091396	1091573	1	8	+	1091396	1091573	0,205,102
chr4	1091396	1092855	1	1	+	1091396	1092855	0,205,102
chr4	1091396	1093491	1	1	+	1091396	1093491	0,205,102
chr4	1091444	1091774	1	1	+	1091444	1091774	0,255,127
chr4	1091522	1091774	2	2	+	1091522	1091774	0,255,127
chr4	1091533	1091849	1	1	+	1091533	1091849	0,255,127
chr4	1091533	1092209	1	1	+	1091533	1092209	0,205,102
chr4	1091615	1091843	1	1	+	1091615	1091843	0,255,127
chr4	1091689	1091915	1	1	+	1091689	1091915	0,255,127
chr4	1091714	1092882	1	2	+	1091714	1092882	16,78,139
chr4	1091718	1091843	1	3	+	1091718	1091843	0,255,127
chr4	1091738	1092882	1	4	+	1091738	1092882	16,78,139
chr4	1091819	1092123	1	1	+	1091819	1092123	0,255,127
chr4	1091852	1092251	1	1	+	1091852	1092251	0,255,127
chr4	1091871	1091996	1	9	+	1091871	1091996	0,255,127
chr4	1091908	1092024	1	3	+	1091908	1092024	0,255,127
chr4	1091916	1092060	1	1	+	1091916	1092060	0,255,127
chr4	1091916	1092568	1	1	+	1091916	1092568	0,255,127
chr4	1091933	1095268	1	1	+	1091933	1095268	0,255,127
chr4	1091942	1092060	1	1	+	1091942	1092060	0,255,127
chr4	1091986	1092421	1	1	+	1091986	1092421	0,255,127
chr4	1092002	1096261	1	1	+	1092002	1096261	0,255,127
chr4	1092006	1096615	1	1	+	1092006	1096615	0,255,127
chr4	1092109	1092491	1	3	+	1092109	1092491	0,205,102
chr4	1092133	1092626	1	1	+	1092133	1092626	0,255,127
chr4	1092145	1092368	1	4	+	1092145	1092368	0,255,127
chr4	1092151	1092732	2	2	+	1092151	1092732	0,255,127
chr4	1092189	1092381	1	1	+	1092189	1092381	0,255,127
chr4	1092193	1092863	1	1	+	1092193	1092863	0,255,127
chr4	1092219	1092368	1	1	+	1092219	1092368	0,255,127
chr4	1092220	1092630	1	1	+	1092220	1092630	0,255,127
chr4	1092260	1092411	1	3	+	1092260	1092411	0,205,102
chr4	1092268	1092441	1	1	+	1092268	1092441	0,255,127
chr4	1092274	1092435	1	1	+	1092274	1092435	0,255,127
chr4	1092298	1092858	2	2	+	1092298	1092858	0,255,127
chr4	1092311	1092728	1	1	+	1092311	1092728	0,255,127
chr4	1092311	1092876	1	1	+	1092311	1092876	0,255,127
chr4	1092316	1092490	1	1	+	1092316	1092490	0,255,127
chr4	1092318	1092525	1	1	+	1092318	1092525	0,255,127
chr4	1092359	1092805	1	1	+	1092359	1092805	0,255,127
chr4	1092359	1092928	2	2	+	1092359	1092928	0,255,127
chr4	1092393	1094187	1	1	+	1092393	1094187	0,255,127
chr4	1092401	1094853	2	2	+	1092401	1094853	0,255,127
chr4	1092406	1095961	1	1	+	1092406	1095961	0,255,127
chr4	1092431	1092762	1	3	+	1092431	1092762	0,255,127
chr4	1092437	1092652	1	1	+	1092437	1092652	0,255,127
chr4	1092498	1092614	1	1	+	1092498	1092614	0,255,127
chr4	1092537	1152610	1	1	+	1092537	1152610	0,255,127
chr4	1092537	1249927	2	2	+	1092537	1249927	0,255,127
chr4	1092541	1092876	1	1	+	1092541	1092876	0,255,127
chr4	1092541	1252419	1	1	+	1092541	1252419	0,255,127
chr4	1092641	1092805	1	1	+	1092641	1092805	0,255,127
chr4	1092655	1092773	1	1	+	1092655	1092773	0,255,127
chr4	1092681	1092841	1	1	+	1092681	1092841	0,205,102
chr4	1092726	1092868	1	1	+	1092726	1092868	0,255,127
chr4	1092863	1093692	1	1	+	1092863	1093692	0,255,127
chr4	1092907	1095106	2	2	+	1092907	1095106	0,255,127
chr4	1093109	1093962	1	1	+	1093109	1093962	0,255,127
chr4	1093290	1094957	1	1	+	1093290	1094957	0,255,127
chr4	1093306	1093929	1	1	+	1093306	1093929	0,255,127
chr4	1093378	1093873	1	1	+	1093378	1093873	0,255,127
chr4	1093562	1095106	1	1	+	1093562	1095106	0,255,127
chr4	1093593	1093761	1	1	+	1093593	1093761	0,255,127
chr4	1093631	1093962	1	1	+	1093631	1093962	0,255,127
chr4	1093651	1093854	1	1	+	1093651	1093854	0,255,127
chr4	1093681	1093836	1	8525	+	1093681	1093836	16,78,139
chr4	1093681	1093864	1	11	+	1093681	1093864	0,205,102
chr4	1093681	1093893	1	4	+	1093681	1093893	0,205,102
chr4	1093681	1096291	1	9	+	1093681	1096291	0,205,102
chr4	1093747	1094168	1	1	+	1093747	1094168	0,255,127
chr4	1093754	1093885	1	3	+	1093754	1093885	0,255,127
chr4	1093829	1094448	1	1	+	1093829	1094448	0,255,127
chr4	1093857	1094371	2	2	+	1093857	1094371	0,255,127
chr4	1093878	1094114	1	5	+	1093878	1094114	0,205,102
chr4	1093950	1094096	1	1	+	1093950	1094096	0,255,127
chr4	1093953	1094114	1	33	+	1093953	1094114	0,255,127
chr4	1093957	1094114	10	19540	+	1093957	1094114	16,78,139
chr4	1093957	1094137	1	3	+	1093957	1094137	0,205,102
chr4	1093957	1096291	1	14	+	1093957	1096291	0,205,102
chr4	1093961	1094114	1	4	+	1093961	1094114	0,205,102
chr4	1094023	1094481	1	1	+	1094023	1094481	0,255,127
chr4	1094087	1094395	1	1	+	1094087	1094395	0,255,127
chr4	1094087	1094574	1	1	+	1094087	1094574	0,255,127
chr4	1094177	1094331	1	5	+	1094177	1094331	0,205,102
chr4	1094430	1095763	1	1	+	1094430	1095763	0,255,127
chr4	1094474	1094607	1	1	+	1094474	1094607	0,255,127
chr4	1094814	1095118	1	1	+	1094814	1095118	0,255,127
chr4	1094858	1095106	1	1	+	1094858	1095106	0,255,127
chr4	1094904	1095053	1	1	+	1094904	1095053	0,255,127
chr4	1094906	1095053	1	1	+	1094906	1095053	0,255,127
chr4	1094909	1095030	1	1	+	1094909	1095030	0,255,127
chr4	1094914	1095264	1	1	+	1094914	1095264	0,255,127
chr4	1094963	1095274	1	1	+	1094963	1095274	0,255,127
chr4	1094975	1095480	1	1	+	1094975	1095480	0,255,127
chr4	1094987	1095481	1	1	+	1094987	1095481	0,255,127
chr4	1095009	1095190	1	2	+	1095009	1095190	0,255,127
chr4	1095012	1095193	1	13	+	1095012	1095193	0,255,127
chr4	1095020	1095201	1	8	+	1095020	1095201	0,205,102
chr4	1095055	1095201	1	1	+	1095055	1095201	0,205,102
chr4	1095068	1095196	1	2	+	1095068	1095196	0,255,127
chr4	1095077	1095220	1	2	+	1095077	1095220	0,205,102
chr4	1095083	1095306	2	2	+	1095083	1095306	0,205,102
chr4	1095114	1095318	1	1	+	1095114	1095318	0,255,127
chr4	1095144	1095686	1	1	+	1095144	1095686	0,255,127
chr4	1095150	1095437	1	1	+	1095150	1095437	0,255,127
chr4	1095195	1095317	1	2	+	1095195	1095317	0,255,127
chr4	1095201	1095784	1	1	+	1095201	1095784	0,255,127
chr4	1095216	1095432	1	1	+	1095216	1095432	0,255,127
chr4	1095221	1096591	1	2	+	1095221	1096591	0,255,127
chr4	1095227	1095682	1	1	+	1095227	1095682	0,255,127
chr4	1095227	1096591	1	1	+	1095227	1096591	0,255,127
chr4	1095237	1095784	1	4	+	1095237	1095784	0,255,127
chr4	1095246	1096182	1	2	+	1095246	1096182	0,255,127
chr4	1095246	1096189	1	1	+	1095246	1096189	0,255,127
chr4	1095253	1095941	1	1	+	1095253	1095941	0,255,127
chr4	1095267	1095402	1	1	+	1095267	1095402	0,255,127
chr4	1095267	1096182	1	18	+	1095267	1096182	0,255,127
chr4	1095291	1095751	1	1	+	1095291	1095751	0,255,127
chr4	1095296	1096556	1	1	+	1095296	1096556	0,255,127
chr4	1095371	1095861	2	2	+	1095371	1095861	0,255,127
chr4	1095394	1096291	1	1	+	1095394	1096291	0,205,102
chr4	1095426	1096397	1	1	+	1095426	1096397	0,255,127
chr4	1095562	1095756	2	2	+	1095562	1095756	0,255,127
chr4	1095747	1096606	1	1	+	1095747	1096606	0,255,127
chr4	1095759	1286803	1	1	+	1095759	1286803	0,255,127
chr4	1095799	1096332	1	1	+	1095799	1096332	0,255,127
chr4	1095809	1096008	1	1	+	1095809	1096008	0,255,127
chr4	1095815	1095967	1	1	+	1095815	1095967	0,255,127
chr4	1095873	1096484	1	4	+	1095873	1096484	0,255,127
chr4	1095876	1096182	1	1	+	1095876	1096182	0,255,127
chr4	1095881	1197965	1	1	+	1095881	1197965	0,255,127
chr4	1095923	1096606	1	2	+	1095923	1096606	0,255,127
chr4	1095947	1096484	1	1	+	1095947	1096484	0,255,127
chr4	1095953	1096622	2	2	+	1095953	1096622	0,255,127
chr4	1095956	1096643	1	1	+	1095956	1096643	0,255,127
chr4	1095981	1096159	1	1	+	1095981	1096159	0,255,127
chr4	1095981	1318239	1	1	+	1095981	1318239	0,255,127
chr4	1096007	1096134	1	1	+	1096007	1096134	0,255,127
chr4	1096014	1096189	1	1	+	1096014	1096189	0,255,127
chr4	1096052	1096467	1	2	+	1096052	1096467	0,255,127
chr4	1096089	1096515	1	1	+	1096089	1096515	0,255,127
chr4	109613	109731	1	1	+	109613	109731	0,255,127
chr4	1096133	1096291	1500	65944	+	1096133	1096291	16,78,139
chr4	1096133	1096293	1	2	+	1096133	1096293	0,255,127
chr4	1096133	1096312	1	6	+	1096133	1096312	0,205,102
chr4	109624	455687	1	5	+	109624	455687	0,255,127
chr4	1096240	1096372	1	1	+	1096240	1096372	0,205,102
chr4	1096240	1096467	1	1	+	1096240	1096467	0,205,102
chr4	1096240	1096484	1	1	+	1096240	1096484	0,255,127
chr4	1096242	1096505	1	1	+	1096242	1096505	0,255,127
chr4	1096274	1096487	1	1	+	1096274	1096487	0,255,127
chr4	1096280	1096606	1	1	+	1096280	1096606	0,255,127
chr4	1096312	1096467	1003	123265	+	1096312	1096467	16,78,139
chr4	1096312	1096497	1	4	+	1096312	1096497	0,205,102
chr4	1096312	1096525	1	4	+	1096312	1096525	0,255,127
chr4	1096312	1096613	1	1	+	1096312	1096613	0,255,127
chr4	1096319	1096449	1	1	+	1096319	1096449	0,255,127
chr4	1096361	1096482	1	1	+	1096361	1096482	0,255,127
chr4	1096380	1096643	2	2	+	1096380	1096643	0,255,127
chr4	1096410	1096622	1	1	+	1096410	1096622	0,255,127
chr4	1096425	1096540	1	1	+	1096425	1096540	0,255,127
chr4	1096425	1096575	1	1	+	1096425	1096575	0,255,127
chr4	1096426	1096782	1	1	+	1096426	1096782	0,255,127
chr4	1096444	1136086	1	1	+	1096444	1136086	0,255,127
chr4	1096462	1096577	2	2	+	1096462	1096577	0,255,127
chr4	1096486	1096605	1	1	+	1096486	1096605	0,255,127
chr4	1096486	1096637	1	1	+	1096486	1096637	0,255,127
chr4	1096488	1096700	1	1	+	1096488	1096700	0,255,127
chr4	1096490	1096656	1	1	+	1096490	1096656	0,255,127
chr4	1096492	1096622	1	1	+	1096492	1096622	0,255,127
chr4	1096492	1261644	1	1	+	1096492	1261644	0,255,127
chr4	1096506	1213535	1	1	+	1096506	1213535	0,255,127
chr4	1096515	1097055	1	3	+	1096515	1097055	0,255,127
chr4	1096538	1097055	1	1	+	1096538	1097055	0,255,127
chr4	1096550	1096724	1	1	+	1096550	1096724	0,255,127
chr4	1096604	1097055	1	1	+	1096604	1097055	0,255,127
chr4	1096642	1097054	2	2	+	1096642	1097054	0,255,127
chr4	1096650	1097055	1	1	+	1096650	1097055	0,255,127
chr4	1096660	1096775	1	1	+	1096660	1096775	0,205,102
chr4	1096661	1097055	1	1	+	1096661	1097055	0,255,127
chr4	1096668	1197325	1	1	+	1096668	1197325	0,255,127
chr4	1096682	1111762	1	1	+	1096682	1111762	0,255,127
chr4	1096760	1193982	1	1	+	1096760	1193982	0,255,127
chr4	1096760	1279002	2	2	+	1096760	1279002	0,255,127
chr4	1096772	1097055	1	4	+	1096772	1097055	0,255,127
chr4	1096786	1097176	1	51	+	1096786	1097176	0,255,127
chr4	1096787	1097176	1	1	+	1096787	1097176	0,255,127
chr4	1097456	1097998	1	1	+	1097456	1097998	0,255,127
chr4	1097550	1097917	1	1	+	1097550	1097917	0,255,127
chr4	1098078	1136003	2	2	+	1098078	1136003	0,255,127
chr4	1098371	1098561	1	2	+	1098371	1098561	0,205,102
chr4	1098392	1098732	1	1	+	1098392	1098732	0,255,127
chr4	1098405	1098561	107	9331	+	1098405	1098561	16,78,139
chr4	1099088	1099248	1	1	+	1099088	1099248	0,205,102
chr4	1099095	1099248	1	570	+	1099095	1099248	16,78,139
chr4	1099405	1100932	1	1704	+	1099405	1100932	16,78,139
chr4	1099405	1102802	1	257	+	1099405	1102802	0,205,102
chr4	1099405	1138526	1	1	+	1099405	1138526	0,205,102
chr4	1099717	1100932	1	1	+	1099717	1100932	0,205,102
chr4	1100083	1135471	1	1	+	1100083	1135471	0,255,127
chr4	1100407	1146576	1	1	+	1100407	1146576	0,255,127
chr4	1100455	1155145	1	1	+	1100455	1155145	0,255,127
chr4	1101020	1101622	1	2	+	1101020	1101622	0,205,102
chr4	1101020	1102802	1	193	+	1101020	1102802	0,205,102
chr4	1101231	1102802	1	1	+	1101231	1102802	0,205,102
chr4	1101595	1102802	1	7	+	1101595	1102802	0,205,102
chr4	1101783	1102405	1	22	+	1101783	1102405	0,205,102
chr4	1101783	1102802	1	2171	+	1101783	1102802	16,78,139
chr4	1102140	1102322	1	1	+	1102140	1102322	0,255,127
chr4	1102386	1102802	1	2	+	1102386	1102802	0,205,102
chr4	1102398	1102802	1	20	+	1102398	1102802	0,205,102
chr4	1103154	1103316	1	9	+	1103154	1103316	0,205,102
chr4	1103159	1103316	1	37	+	1103159	1103316	0,205,102
chr4	1103193	1103350	1	1	+	1103193	1103350	0,205,102
chr4	1103389	1103566	1	2	+	1103389	1103566	0,205,102
chr4	1103845	1105289	1	2	+	1103845	1105289	0,205,102
chr4	1103849	1105289	1	41	+	1103849	1105289	16,78,139
chr4	110466	110943	1	1	+	110466	110943	0,205,102
chr4	110466	111353	1	4	+	110466	111353	0,205,102
chr4	110466	111867	1	1	+	110466	111867	0,205,102
chr4	110466	111870	1	4	+	110466	111870	0,205,102
chr4	110466	114067	1	3	+	110466	114067	0,205,102
chr4	110466	114813	1	3	+	110466	114813	0,205,102
chr4	110466	114840	1	1	+	110466	114840	0,205,102
chr4	110466	114849	1	1	+	110466	114849	0,205,102
chr4	110466	115098	1	2	+	110466	115098	0,205,102
chr4	1105906	1146485	1	1	+	1105906	1146485	0,255,127
chr4	1105911	1111659	1	1	+	1105911	1111659	0,255,127
chr4	1105921	1127920	1	1	+	1105921	1127920	0,255,127
chr4	1105990	1146684	1	1	+	1105990	1146684	0,255,127
chr4	1106028	1236719	1	1	+	1106028	1236719	0,255,127
chr4	1106204	1228570	1	1	+	1106204	1228570	0,255,127
chr4	1106484	1109244	1	1	+	1106484	1109244	0,205,102
chr4	1106484	1112934	1	7	+	1106484	1112934	0,205,102
chr4	1107153	1107310	1	2	+	1107153	1107310	0,205,102
chr4	1109452	1112934	1	8	+	1109452	1112934	16,78,139
chr4	1109455	1112934	1	1	+	1109455	1112934	0,205,102
chr4	1109510	1112934	2	2	+	1109510	1112934	0,205,102
chr4	110958	111338	1	1	+	110958	111338	0,205,102
chr4	110958	111353	1	1	+	110958	111353	0,205,102
chr4	1109638	1112934	1	47	+	1109638	1112934	16,78,139
chr4	1109638	1116251	1	3	+	1109638	1116251	0,205,102
chr4	1109674	1112934	1	1	+	1109674	1112934	0,205,102
chr4	110982	111338	1	1	+	110982	111338	0,205,102
chr4	110982	112733	1	1	+	110982	112733	0,205,102
chr4	1110311	1149919	1	1	+	1110311	1149919	0,255,127
chr4	1110340	1211549	1	1	+	1110340	1211549	0,255,127
chr4	1110399	1211544	1	1	+	1110399	1211544	0,255,127
chr4	1110429	1253753	2	2	+	1110429	1253753	0,255,127
chr4	1110442	1115763	1	1	+	1110442	1115763	0,255,127
chr4	1110442	1212133	1	1	+	1110442	1212133	0,255,127
chr4	1110442	1224895	2	2	+	1110442	1224895	0,255,127
chr4	1110442	1232120	1	1	+	1110442	1232120	0,255,127
chr4	1110442	1253728	1	1	+	1110442	1253728	0,255,127
chr4	111135	111353	1	1	+	111135	111353	0,205,102
chr4	111135	111870	1	1	+	111135	111870	0,205,102
chr4	1111593	1149825	1	1	+	1111593	1149825	0,255,127
chr4	111165	111353	1	1	+	111165	111353	0,205,102
chr4	111165	112733	1	1	+	111165	112733	0,205,102
chr4	111167	111353	1	3	+	111167	111353	0,205,102
chr4	111167	112518	1	1	+	111167	112518	0,205,102
chr4	111167	112637	1	1	+	111167	112637	0,205,102
chr4	111167	112680	1	1	+	111167	112680	0,205,102
chr4	111167	112733	1	3	+	111167	112733	0,205,102
chr4	1111694	1211544	1	1	+	1111694	1211544	0,255,127
chr4	1111759	1148375	1	1	+	1111759	1148375	0,255,127
chr4	1113192	1116237	1	1	+	1113192	1116237	0,255,127
chr4	1113204	1116251	1	35	+	1113204	1116251	16,78,139
chr4	111353	111893	1	1	+	111353	111893	0,255,127
chr4	111433	111739	2	2	+	111433	111739	0,205,102
chr4	111433	111867	1	7	+	111433	111867	0,205,102
chr4	111433	111870	1	1	+	111433	111870	0,205,102
chr4	111433	111948	1	1	+	111433	111948	0,205,102
chr4	111433	112569	2	2	+	111433	112569	0,205,102
chr4	111433	112574	1	2	+	111433	112574	0,205,102
chr4	111433	112733	1	3	+	111433	112733	0,205,102
chr4	111433	112808	1	1	+	111433	112808	0,205,102
chr4	111433	113810	1	1	+	111433	113810	0,205,102
chr4	111433	115098	1	15	+	111433	115098	0,205,102
chr4	111497	111929	1	1	+	111497	111929	0,255,127
chr4	1115329	1116251	1	3	+	1115329	1116251	0,205,102
chr4	1115329	1131456	1	1	+	1115329	1131456	0,205,102
chr4	1115417	1253778	1	1	+	1115417	1253778	0,255,127
chr4	1115650	1141919	1	1	+	1115650	1141919	0,255,127
chr4	1115650	1265436	2	2	+	1115650	1265436	0,255,127
chr4	1115981	1252188	1	1	+	1115981	1252188	0,255,127
chr4	1116288	1116469	1	8	+	1116288	1116469	0,255,127
chr4	1116288	1116472	1	1	+	1116288	1116472	0,255,127
chr4	1116292	1116459	2	2	+	1116292	1116459	0,255,127
chr4	1116292	1116469	1	61	+	1116292	1116469	16,78,139
chr4	1116408	1122609	1	152	+	1116408	1122609	16,78,139
chr4	1116408	1124210	1	1	+	1116408	1124210	0,205,102
chr4	1116408	1126827	1	1	+	1116408	1126827	0,205,102
chr4	111658	111867	1	2	+	111658	111867	0,205,102
chr4	111658	112571	1	1	+	111658	112571	0,205,102
chr4	111658	112637	1	1	+	111658	112637	0,205,102
chr4	111658	112680	1	1	+	111658	112680	0,205,102
chr4	111658	112733	1	8	+	111658	112733	0,205,102
chr4	111658	112737	2	2	+	111658	112737	0,205,102
chr4	111658	113779	1	1	+	111658	113779	0,205,102
chr4	111658	113810	1	2	+	111658	113810	0,205,102
chr4	111658	115098	1	4	+	111658	115098	0,205,102
chr4	111659	111868	1	1	+	111659	111868	0,255,127
chr4	1118853	1122609	1	1	+	1118853	1122609	0,205,102
chr4	111927	112633	1	1	+	111927	112633	0,205,102
chr4	111937	112112	1	1	+	111937	112112	0,205,102
chr4	111937	112574	2	2	+	111937	112574	0,205,102
chr4	111937	112680	1	1	+	111937	112680	0,205,102
chr4	111937	112733	1	1	+	111937	112733	0,205,102
chr4	111937	112737	1	1	+	111937	112737	0,205,102
chr4	111937	112808	1	1	+	111937	112808	0,205,102
chr4	111937	115098	1	10	+	111937	115098	0,205,102
chr4	1119534	1122585	1	1	+	1119534	1122585	0,205,102
chr4	1119534	1122609	1	30	+	1119534	1122609	16,78,139
chr4	1119534	1124210	2	2	+	1119534	1124210	0,205,102
chr4	1122675	1124210	1	303	+	1122675	1124210	16,78,139
chr4	1123390	1147993	1	3	+	1123390	1147993	0,255,127
chr4	1124308	1126827	1	148	+	1124308	1126827	16,78,139
chr4	112450	112677	1	1	+	112450	112677	0,255,127
chr4	1125092	1125403	1	1	+	1125092	1125403	0,255,127
chr4	112642	112808	1	102	+	112642	112808	0,205,102
chr4	1127173	1128374	1	135	+	1127173	1128374	16,78,139
chr4	112763	112913	1	1	+	112763	112913	0,255,127
chr4	112776	112905	1	1	+	112776	112905	0,205,102
chr4	112776	112929	1	1389	+	112776	112929	0,205,102
chr4	112776	112943	1	5	+	112776	112943	0,205,102
chr4	1128366	1128773	1	227	+	1128366	1128773	16,78,139
chr4	112864	113031	2	2	+	112864	113031	0,205,102
chr4	112864	113044	1	37	+	112864	113044	0,205,102
chr4	112864	113111	1	5	+	112864	113111	0,205,102
chr4	112864	113417	1	1	+	112864	113417	0,205,102
chr4	112864	113481	1	1	+	112864	113481	0,205,102
chr4	112864	113810	1	1	+	112864	113810	0,205,102
chr4	112864	115098	1	6	+	112864	115098	0,205,102
chr4	1128920	1129149	1	96	+	1128920	1129149	16,78,139
chr4	1128920	1129155	1	47	+	1128920	1129155	16,78,139
chr4	1128920	1131456	1	81	+	1128920	1131456	16,78,139
chr4	1129148	1129784	1	14	+	1129148	1129784	16,78,139
chr4	1129148	1130143	3	3	+	1129148	1130143	0,205,102
chr4	1129148	1131456	1	13	+	1129148	1131456	16,78,139
chr4	112984	113138	1	1	+	112984	113138	0,205,102
chr4	112984	113187	1	10	+	112984	113187	0,205,102
chr4	112984	113417	1	25	+	112984	113417	0,205,102
chr4	112984	113477	1	12	+	112984	113477	0,205,102
chr4	112984	113481	1	26	+	112984	113481	0,205,102
chr4	112984	113486	1	12	+	112984	113486	0,205,102
chr4	112984	113810	1	1	+	112984	113810	0,205,102
chr4	112984	113843	1	2	+	112984	113843	0,205,102
chr4	112984	113863	1	4	+	112984	113863	0,205,102
chr4	112984	114067	1	1	+	112984	114067	0,205,102
chr4	112984	114788	1	43	+	112984	114788	0,205,102
chr4	112984	114813	1	54	+	112984	114813	0,205,102
chr4	112984	114840	1	6	+	112984	114840	0,205,102
chr4	112984	114849	1	3	+	112984	114849	0,205,102
chr4	112984	115098	1	694	+	112984	115098	0,205,102
chr4	1130176	1131456	1	229	+	1130176	1131456	24116205
chr4	113024	116177	1	1	+	113024	116177	0,255,127
chr4	1131464	1131963	1	353	+	1131464	1131963	16,78,139
chr4	1132045	1132231	2	2	+	1132045	1132231	0,205,102
chr4	1132718	1132842	1	1	+	1132718	1132842	24116205
chr4	1133467	1133850	1	7	+	1133467	1133850	0,255,127
chr4	1133471	1138526	1	1	+	1133471	1138526	0,205,102
chr4	1134961	1274055	1	1	+	1134961	1274055	0,255,127
chr4	1135317	1251152	1	1	+	1135317	1251152	0,255,127
chr4	1135439	1148523	1	1	+	1135439	1148523	0,255,127
chr4	1135720	1136307	1	1	+	1135720	1136307	0,255,127
chr4	1135903	1136152	1	1	+	1135903	1136152	0,255,127
chr4	1136022	1136219	1	1	+	1136022	1136219	0,205,102
chr4	1136161	1136323	1	1	+	1136161	1136323	0,255,127
chr4	1136221	1136338	1	1	+	1136221	1136338	0,255,127
chr4	1136395	1136519	1	1	+	1136395	1136519	0,255,127
chr4	1136462	1136631	1	2	+	1136462	1136631	0,205,102
chr4	1136470	1136631	107	6055	+	1136470	1136631	16,78,139
chr4	1136473	1136631	10	2574	+	1136473	1136631	16,78,139
chr4	1136491	1136631	1	1	+	1136491	1136631	0,205,102
chr4	1136655	1136815	1	2	+	1136655	1136815	0,205,102
chr4	1136655	1136822	1	1	+	1136655	1136822	0,205,102
chr4	1136655	1137001	1	6429	+	1136655	1137001	16,78,139
chr4	1136655	1137032	1	1	+	1136655	1137032	0,255,127
chr4	1136655	1137097	1	1	+	1136655	1137097	0,205,102
chr4	1136655	1137335	1	1	+	1136655	1137335	0,205,102
chr4	1136655	1138526	1	35	+	1136655	1138526	0,205,102
chr4	1136671	1137001	1	7	+	1136671	1137001	0,255,127
chr4	1136830	1137001	1	3	+	1136830	1137001	0,205,102
chr4	1137026	1137190	1	7	+	1137026	1137190	0,205,102
chr4	1137032	1137190	1	3233	+	1137032	1137190	16,78,139
chr4	1137032	1138526	1	2	+	1137032	1138526	0,205,102
chr4	1137051	1137190	1	1	+	1137051	1137190	0,205,102
chr4	1137166	1137335	1	17	+	1137166	1137335	0,205,102
chr4	1137172	1137335	1	9	+	1137172	1137335	0,205,102
chr4	1137174	1137335	15	9239	+	1137174	1137335	16,78,139
chr4	1137174	1138526	1	1	+	1137174	1138526	0,205,102
chr4	1137322	1137509	1	6	+	1137322	1137509	0,205,102
chr4	1137356	1137509	1	13	+	1137356	1137509	0,205,102
chr4	1137368	1137609	2	2	+	1137368	1137609	0,205,102
chr4	1137368	1138526	1	27	+	1137368	1138526	0,205,102
chr4	1137446	1137609	1	71	+	1137446	1137609	0,205,102
chr4	1137446	1137813	1	3	+	1137446	1137813	0,205,102
chr4	1137446	1138526	1	51	+	1137446	1138526	0,205,102
chr4	1137464	1137615	1	1	+	1137464	1137615	0,255,127
chr4	1137486	1137601	1	1	+	1137486	1137601	0,255,127
chr4	1137593	1137813	1	1	+	1137593	1137813	0,255,127
chr4	1137610	1139348	1	1	+	1137610	1139348	0,255,127
chr4	1137622	1137813	1	1	+	1137622	1137813	0,205,102
chr4	1137635	1137876	1	1	+	1137635	1137876	0,255,127
chr4	1137686	1159558	1	1	+	1137686	1159558	0,255,127
chr4	1137790	1138526	10	14969	+	1137790	1138526	16,78,139
chr4	1137799	1138526	1	1	+	1137799	1138526	0,255,127
chr4	1138126	1138526	1	1	+	1138126	1138526	0,255,127
chr4	1138219	1138562	1	1	+	1138219	1138562	0,255,127
chr4	1138309	1138526	1	2	+	1138309	1138526	0,205,102
chr4	1138365	1138555	1	1	+	1138365	1138555	0,255,127
chr4	1138481	1138600	1	1	+	1138481	1138600	0,255,127
chr4	1138481	1138643	1056	21712	+	1138481	1138643	16,78,139
chr4	1138481	1138647	1	66	+	1138481	1138647	0,205,102
chr4	1138481	1138666	1	1	+	1138481	1138666	0,255,127
chr4	1138481	1138747	1	1	+	1138481	1138747	0,205,102
chr4	113849	114788	1	2	+	113849	114788	0,205,102
chr4	113849	114813	1	2	+	113849	114813	0,205,102
chr4	113849	115098	10	1851	+	113849	115098	16,78,139
chr4	113849	128078	1	1	+	113849	128078	0,205,102
chr4	1138705	1138841	1	1	+	1138705	1138841	0,255,127
chr4	1139198	1139592	1	2	+	1139198	1139592	0,205,102
chr4	1139204	1139519	1	1	+	1139204	1139519	0,255,127
chr4	1139381	1139592	1	1	+	1139381	1139592	0,205,102
chr4	1139593	1140612	10	732	+	1139593	1140612	16,78,139
chr4	1139593	1201723	1	1	+	1139593	1201723	0,205,102
chr4	113997	115098	1	12	+	113997	115098	0,205,102
chr4	1140623	1140781	10	1090	+	1140623	1140781	16,78,139
chr4	1141160	1141334	1	10	+	1141160	1141334	0,205,102
chr4	1141182	1141334	1	5047	+	1141182	1141334	16,78,139
chr4	1141182	1142134	1	17	+	1141182	1142134	0,205,102
chr4	1141365	1142134	1	2	+	1141365	1142134	0,205,102
chr4	1141377	1142034	1	1	+	1141377	1142034	0,205,102
chr4	1141377	1142134	1	5401	+	1141377	1142134	16,78,139
chr4	1141377	1143503	1	1	+	1141377	1143503	0,205,102
chr4	1141377	1143898	1	4	+	1141377	1143898	16,78,139
chr4	1141413	1274073	1	1	+	1141413	1274073	0,255,127
chr4	1141633	1146578	1	1	+	1141633	1146578	0,255,127
chr4	1141633	1274086	1	1	+	1141633	1274086	0,255,127
chr4	1141633	1274087	1	2	+	1141633	1274087	0,255,127
chr4	1141757	1146718	2	2	+	1141757	1146718	0,255,127
chr4	1141787	1253686	1	1	+	1141787	1253686	0,205,102
chr4	1141964	1142134	1	1	+	1141964	1142134	0,205,102
chr4	1142165	1143898	1	5	+	1142165	1143898	16,78,139
chr4	1142184	1143911	2	2	+	1142184	1143911	0,255,127
chr4	1142198	1142429	1	3	+	1142198	1142429	0,205,102
chr4	1142198	1143108	1	2	+	1142198	1143108	0,205,102
chr4	1142198	1143503	1	42	+	1142198	1143503	16,78,139
chr4	1142198	1143734	1	1	+	1142198	1143734	0,205,102
chr4	1142198	1143886	1	8	+	1142198	1143886	16,78,139
chr4	1142198	1143898	1	563	+	1142198	1143898	16,78,139
chr4	1142198	1143919	1	18	+	1142198	1143919	0,205,102
chr4	1142198	1145235	1	1	+	1142198	1145235	0,205,102
chr4	1142442	1143503	1	1	+	1142442	1143503	0,205,102
chr4	1142517	1142644	1	8	+	1142517	1142644	0,255,127
chr4	1143158	1143503	1	1	+	1143158	1143503	0,205,102
chr4	1143263	1336761	1	1	+	1143263	1336761	0,205,102
chr4	1143564	1145111	1	1	+	1143564	1145111	0,205,102
chr4	1144006	1145111	1	1	+	1144006	1145111	0,205,102
chr4	1144907	1145111	1	108	+	1144907	1145111	16,78,139
chr4	1145137	1145474	1	1	+	1145137	1145474	0,255,127
chr4	1145251	1145409	1	3	+	1145251	1145409	0,205,102
chr4	1145262	1145409	1	1	+	1145262	1145409	0,205,102
chr4	1145274	1145443	10	2004	+	1145274	1145443	16,78,139
chr4	1145445	1145615	1	1	+	1145445	1145615	0,205,102
chr4	1145469	1145625	1	1392	+	1145469	1145625	16,78,139
chr4	1145469	1145637	1	1	+	1145469	1145637	16,78,139
chr4	1145469	1147484	1	1	+	1145469	1147484	0,205,102
chr4	1145473	1145625	1	4	+	1145473	1145625	16,78,139
chr4	1145482	1147484	2	2	+	1145482	1147484	0,205,102
chr4	1145601	1145927	1	5	+	1145601	1145927	0,205,102
chr4	1146115	1146273	1	1	+	1146115	1146273	0,255,127
chr4	1146629	1232133	2	2	+	1146629	1232133	0,255,127
chr4	1146971	1147677	1	1	+	1146971	1147677	0,205,102
chr4	1147328	1147484	1	822	+	1147328	1147484	16,78,139
chr4	1147328	1147605	1	8	+	1147328	1147605	0,205,102
chr4	1147513	1147677	1	29	+	1147513	1147677	16,78,139
chr4	1147513	1149164	1	1	+	1147513	1149164	0,205,102
chr4	1147513	1150110	1	4	+	1147513	1150110	0,205,102
chr4	1147517	1147677	1	2690	+	1147517	1147677	16,78,139
chr4	1147517	1149164	1	1	+	1147517	1149164	0,205,102
chr4	1147517	1150110	1	1	+	1147517	1150110	0,205,102
chr4	114757	115098	1	130	+	114757	115098	0,205,102
chr4	114766	115098	1	82	+	114766	115098	0,205,102
chr4	114766	128078	1	1	+	114766	128078	0,205,102
chr4	1147738	1147899	2	2	+	1147738	1147899	0,205,102
chr4	1147738	1147903	1	2	+	1147738	1147903	0,205,102
chr4	1147738	1148025	1	1	+	1147738	1148025	0,205,102
chr4	1147738	1149164	1	1	+	1147738	1149164	0,205,102
chr4	1147991	1149161	1	2	+	1147991	1149161	0,255,127
chr4	1147991	1149164	1	9503	+	1147991	1149164	16,78,139
chr4	1147991	1150110	1	127	+	1147991	1150110	0,205,102
chr4	1147991	1250877	1	40	+	1147991	1250877	0,205,102
chr4	1148259	1244905	1	1	+	1148259	1244905	0,255,127
chr4	1148336	1253778	1	1	+	1148336	1253778	0,255,127
chr4	1148350	1265382	1	2	+	1148350	1265382	0,255,127
chr4	1148358	1253778	1	1	+	1148358	1253778	0,255,127
chr4	1148386	1224852	1	1	+	1148386	1224852	0,255,127
chr4	1148785	1149142	1	9	+	1148785	1149142	0,255,127
chr4	1149119	1150110	1	213	+	1149119	1150110	0,255,127
chr4	1149231	1150110	1	5214	+	1149231	1150110	16,78,139
chr4	1149231	1150250	1	1	+	1149231	1150250	0,205,102
chr4	1149231	1151868	1	7	+	1149231	1151868	0,205,102
chr4	1149231	1236904	1	1	+	1149231	1236904	0,205,102
chr4	1149433	1149710	1	1	+	1149433	1149710	0,255,127
chr4	1149654	1149815	1	1	+	1149654	1149815	0,255,127
chr4	1149662	1149815	1	98	+	1149662	1149815	0,255,127
chr4	1149701	1149825	1	8	+	1149701	1149825	0,255,127
chr4	1149707	1156269	1	1	+	1149707	1156269	0,255,127
chr4	1149806	1205842	1	1	+	1149806	1205842	0,255,127
chr4	1149894	1150349	1	1	+	1149894	1150349	0,255,127
chr4	1150064	1150241	12	4458	+	1150064	1150241	16,78,139
chr4	1150064	1150700	1	1	+	1150064	1150700	0,205,102
chr4	1150068	1150241	1	1	+	1150068	1150241	0,205,102
chr4	1150183	1150355	1	1	+	1150183	1150355	0,205,102
chr4	1150187	1151233	1	1	+	1150187	1151233	0,255,127
chr4	115024	118572	1	1	+	115024	118572	0,255,127
chr4	115024	120097	2	2	+	115024	120097	0,255,127
chr4	1150268	1150559	1	1	+	1150268	1150559	0,255,127
chr4	1150306	1150700	101	5396	+	1150306	1150700	16,78,139
chr4	115036	115182	1	1	+	115036	115182	0,255,127
chr4	115036	120089	1	2	+	115036	120089	0,255,127
chr4	1150637	1249847	1	1	+	1150637	1249847	0,255,127
chr4	1150759	1151047	1	3	+	1150759	1151047	0,255,127
chr4	1150759	1151058	1	7789	+	1150759	1151058	16,78,139
chr4	1150759	1151068	1	1	+	1150759	1151068	0,205,102
chr4	1150759	1151121	1	1	+	1150759	1151121	0,205,102
chr4	1151001	1151160	1	359	+	1151001	1151160	0,205,102
chr4	115101	115216	1	1	+	115101	115216	0,255,127
chr4	1151071	1152255	2	2	+	1151071	1152255	0,255,127
chr4	1151162	1151324	1	1	+	1151162	1151324	0,205,102
chr4	1151162	1151825	1	1	+	1151162	1151825	0,205,102
chr4	1151162	1151847	1	6	+	1151162	1151847	0,205,102
chr4	1151162	1151868	10	2919	+	1151162	1151868	16,78,139
chr4	1151162	1151871	1	1	+	1151162	1151871	0,205,102
chr4	1151162	1151953	1	1	+	1151162	1151953	0,205,102
chr4	1151162	1154550	1	1	+	1151162	1154550	0,205,102
chr4	115119	120097	1	1	+	115119	120097	0,255,127
chr4	1151821	1151995	1	3	+	1151821	1151995	0,205,102
chr4	1151821	1152028	1	1	+	1151821	1152028	0,205,102
chr4	1151821	1152057	3	3	+	1151821	1152057	0,205,102
chr4	1151821	1154550	1	1	+	1151821	1154550	0,205,102
chr4	1151852	1152727	1	1	+	1151852	1152727	0,255,127
chr4	1151864	1152025	1	1	+	1151864	1152025	0,255,127
chr4	1151867	1152028	1	4	+	1151867	1152028	0,205,102
chr4	115191	115509	1	9	+	115191	115509	0,255,127
chr4	115191	115512	102	6763	+	115191	115512	16,78,139
chr4	115191	118374	1	9	+	115191	118374	0,205,102
chr4	115191	118497	1	1167	+	115191	118497	16,78,139
chr4	115191	120081	1	46	+	115191	120081	0,205,102
chr4	115191	124758	1	3	+	115191	124758	0,205,102
chr4	115191	136623	1	1	+	115191	136623	0,205,102
chr4	115191	145999	1	1	+	115191	145999	0,205,102
chr4	1151972	1152130	1	1	+	1151972	1152130	0,255,127
chr4	1151972	1152164	103	9221	+	1151972	1152164	24116205
chr4	1151972	1152183	1	5	+	1151972	1152183	0,255,127
chr4	1151972	1152376	1	4	+	1151972	1152376	0,255,127
chr4	1151972	1152760	1	4	+	1151972	1152760	0,255,127
chr4	1151972	1154550	1	21	+	1151972	1154550	0,255,127
chr4	1151973	1152165	1	3	+	1151973	1152165	0,255,127
chr4	1151976	1152164	1	18	+	1151976	1152164	0,205,102
chr4	1152008	1152164	1	3	+	1152008	1152164	0,205,102
chr4	1152067	1152255	1	1	+	1152067	1152255	0,255,127
chr4	1152086	1152276	1	1	+	1152086	1152276	0,255,127
chr4	1152163	1152755	1	1	+	1152163	1152755	0,255,127
chr4	1152169	1152315	2	2	+	1152169	1152315	0,205,102
chr4	1152169	1152330	1	7	+	1152169	1152330	0,205,102
chr4	1152169	1152373	1	1	+	1152169	1152373	0,255,127
chr4	1152169	1152376	100	9237	+	1152169	1152376	16,78,139
chr4	1152169	1152579	1	1	+	1152169	1152579	0,205,102
chr4	1152169	1152596	1	30	+	1152169	1152596	0,205,102
chr4	1152169	1152737	1	19	+	1152169	1152737	0,205,102
chr4	1152169	1152760	1	420	+	1152169	1152760	0,205,102
chr4	1152169	1154550	1	170	+	1152169	1154550	0,205,102
chr4	1152348	1154625	2	2	+	1152348	1154625	0,205,102
chr4	1152395	1158568	1	1	+	1152395	1158568	0,255,127
chr4	1152424	1152570	1	11	+	1152424	1152570	0,255,127
chr4	1152500	1153049	1	1	+	1152500	1153049	0,255,127
chr4	1152534	1152737	1	28	+	1152534	1152737	0,205,102
chr4	1152534	1152760	1	942	+	1152534	1152760	16,78,139
chr4	1152534	1154550	102	4939	+	1152534	1154550	16,78,139
chr4	1152534	1154629	1	1	+	1152534	1154629	0,205,102
chr4	1152991	1154550	1	1	+	1152991	1154550	0,205,102
chr4	1153149	1154550	10	1043	+	1153149	1154550	16,78,139
chr4	1153229	1154550	1	2	+	1153229	1154550	0,205,102
chr4	115354	115512	1	1	+	115354	115512	0,205,102
chr4	1153623	1156185	1	1	+	1153623	1156185	0,205,102
chr4	1153623	1156204	1	7	+	1153623	1156204	0,205,102
chr4	1153623	1161162	1	4	+	1153623	1161162	0,205,102
chr4	115414	115753	1	1	+	115414	115753	0,255,127
chr4	1154482	1154644	1	1	+	1154482	1154644	0,205,102
chr4	1154495	1154621	1	1	+	1154495	1154621	0,255,127
chr4	1154622	1155769	1	18	+	1154622	1155769	0,205,102
chr4	1154641	1155764	1	2	+	1154641	1155764	0,255,127
chr4	1154642	1155764	1	8	+	1154642	1155764	0,255,127
chr4	1154643	1155764	1	1	+	1154643	1155764	0,255,127
chr4	1154648	1154827	1	259	+	1154648	1154827	16,78,139
chr4	1154648	1155769	1	7242	+	1154648	1155769	16,78,139
chr4	1154648	1156091	1	1	+	1154648	1156091	0,205,102
chr4	1154648	1156214	1	17	+	1154648	1156214	0,205,102
chr4	1154648	1161804	1	7	+	1154648	1161804	0,205,102
chr4	1154648	1165895	1	1	+	1154648	1165895	0,205,102
chr4	1154648	1169664	1	1	+	1154648	1169664	0,205,102
chr4	1154648	1250877	1	1	+	1154648	1250877	0,205,102
chr4	1154648	1254546	1	1	+	1154648	1254546	0,205,102
chr4	1154648	1268431	1	1	+	1154648	1268431	0,205,102
chr4	1154655	1155153	1	1	+	1154655	1155153	0,255,127
chr4	1154747	1155769	1	1	+	1154747	1155769	0,205,102
chr4	1155000	1245182	1	1	+	1155000	1245182	0,255,127
chr4	1155016	1155153	1	1	+	1155016	1155153	0,255,127
chr4	1155096	1155388	1	1	+	1155096	1155388	0,255,127
chr4	1155097	1155388	1	1	+	1155097	1155388	0,255,127
chr4	1155260	1155388	1	2	+	1155260	1155388	0,255,127
chr4	1155682	1155851	1	12	+	1155682	1155851	0,205,102
chr4	1155698	1156076	1	1	+	1155698	1156076	0,255,127
chr4	1155698	1156077	1	1	+	1155698	1156077	0,255,127
chr4	115578	116514	1	22	+	115578	116514	0,205,102
chr4	115578	116649	1	5	+	115578	116649	0,205,102
chr4	115578	118374	1	10	+	115578	118374	0,205,102
chr4	115578	118497	1	589	+	115578	118497	0,205,102
chr4	115578	120081	1	1318	+	115578	120081	16,78,139
chr4	115578	127747	1	2	+	115578	127747	0,205,102
chr4	115578	128078	1	3	+	115578	128078	0,205,102
chr4	115578	135232	1	1	+	115578	135232	0,205,102
chr4	115578	153861	2	2	+	115578	153861	0,205,102
chr4	1155814	1156288	1	1	+	1155814	1156288	0,255,127
chr4	1155871	1156034	1	88	+	1155871	1156034	0,205,102
chr4	1155877	1156034	1	471	+	1155877	1156034	16,78,139
chr4	1155877	1156036	1	1	+	1155877	1156036	0,205,102
chr4	115590	118176	1	1	+	115590	118176	0,255,127
chr4	1155949	1156107	1	5	+	1155949	1156107	0,205,102
chr4	1155962	1156109	1	1	+	1155962	1156109	0,255,127
chr4	1156054	1156398	1	1	+	1156054	1156398	0,255,127
chr4	1156056	1156204	1	1	+	1156056	1156204	0,255,127
chr4	1156056	1156214	1	1	+	1156056	1156214	0,255,127
chr4	1156060	1156214	102	17611	+	1156060	1156214	16,78,139
chr4	1156060	1156256	1	248	+	1156060	1156256	16,78,139
chr4	1156060	1156462	1	1	+	1156060	1156462	0,255,127
chr4	1156062	1306713	1	1	+	1156062	1306713	0,255,127
chr4	1156166	1242341	1	1	+	1156166	1242341	0,255,127
chr4	1156189	1156648	1	3	+	1156189	1156648	0,205,102
chr4	1156189	1158242	1	14	+	1156189	1158242	16,78,139
chr4	1156213	1156359	1	1	+	1156213	1156359	0,255,127
chr4	1156213	1156377	1	1	+	1156213	1156377	0,255,127
chr4	1156225	1156370	1	1	+	1156225	1156370	0,255,127
chr4	1156347	1156537	1	3	+	1156347	1156537	0,205,102
chr4	1156347	1161804	1	1	+	1156347	1161804	0,205,102
chr4	1156403	1156518	1	1	+	1156403	1156518	0,255,127
chr4	1156740	1157192	1	1	+	1156740	1157192	0,255,127
chr4	1157652	1157816	1	7	+	1157652	1157816	0,205,102
chr4	1157652	1157832	1	1	+	1157652	1157832	0,205,102
chr4	1157955	1158130	1	1	+	1157955	1158130	0,255,127
chr4	1158040	1169170	1	1	+	1158040	1169170	0,255,127
chr4	1158287	1158967	1	2	+	1158287	1158967	0,205,102
chr4	1158287	1160390	1	1	+	1158287	1160390	0,205,102
chr4	1158287	1161162	1	14	+	1158287	1161162	0,205,102
chr4	1158631	1158836	1	1	+	1158631	1158836	0,255,127
chr4	1158729	1159114	1	3	+	1158729	1159114	0,255,127
chr4	1159086	1160116	1	1	+	1159086	1160116	0,255,127
chr4	1159251	1169007	1	1	+	1159251	1169007	0,255,127
chr4	1159566	1161202	1	1	+	1159566	1161202	0,255,127
chr4	1159616	1161320	1	1	+	1159616	1161320	0,255,127
chr4	1159970	1160390	1	1	+	1159970	1160390	0,255,127
chr4	1160395	1160549	1	21	+	1160395	1160549	0,205,102
chr4	1160526	1160859	1	1	+	1160526	1160859	0,255,127
chr4	1160558	1161444	1	1	+	1160558	1161444	0,255,127
chr4	1160576	1160759	1	12	+	1160576	1160759	0,205,102
chr4	1160576	1160793	1	1	+	1160576	1160793	0,205,102
chr4	1160576	1160800	1	1	+	1160576	1160800	0,205,102
chr4	1160576	1160845	1	1	+	1160576	1160845	0,205,102
chr4	1160576	1161162	100	6771	+	1160576	1161162	16,78,139
chr4	1160634	1160793	1	9	+	1160634	1160793	0,205,102
chr4	1160634	1160800	1	1	+	1160634	1160800	0,205,102
chr4	1160634	1161162	1	4	+	1160634	1161162	0,205,102
chr4	1160842	1161162	1	9	+	1160842	1161162	0,205,102
chr4	1160996	1161162	1	7	+	1160996	1161162	0,205,102
chr4	1161002	1161162	1	43	+	1161002	1161162	0,205,102
chr4	1161010	1161162	1	1	+	1161010	1161162	0,255,127
chr4	1161088	1164182	1	1	+	1161088	1164182	0,255,127
chr4	1161253	1161446	1	1	+	1161253	1161446	0,255,127
chr4	1161395	1161634	1	1	+	1161395	1161634	0,255,127
chr4	1161466	1161635	1	157	+	1161466	1161635	0,205,102
chr4	1161466	1161683	1	3	+	1161466	1161683	0,205,102
chr4	1161471	1161629	1	1	+	1161471	1161629	0,255,127
chr4	1161472	1161631	1	2	+	1161472	1161631	0,255,127
chr4	1161477	1161635	1006	28213	+	1161477	1161635	16,78,139
chr4	1161477	1162018	1	1	+	1161477	1162018	0,255,127
chr4	1161943	1162935	1	1	+	1161943	1162935	0,205,102
chr4	1161943	1164124	1	490	+	1161943	1164124	16,78,139
chr4	1161943	1164302	1	9	+	1161943	1164302	0,205,102
chr4	1162085	1165895	1	1	+	1162085	1165895	0,205,102
chr4	1164141	1164298	1	1	+	1164141	1164298	0,205,102
chr4	1164141	1164302	102	4348	+	1164141	1164302	16,78,139
chr4	1164143	1164304	1	2	+	1164143	1164304	0,255,127
chr4	1164397	1165641	1	7	+	1164397	1165641	0,205,102
chr4	1164397	1167145	1	7	+	1164397	1167145	0,205,102
chr4	1164438	1165641	1	3	+	1164438	1165641	0,205,102
chr4	1164438	1167145	1	3	+	1164438	1167145	0,205,102
chr4	116444	116626	1	1	+	116444	116626	0,205,102
chr4	1164444	1164660	1	4139	+	1164444	1164660	16,78,139
chr4	1164444	1165641	1	9	+	1164444	1165641	0,205,102
chr4	1164444	1166883	1	4	+	1164444	1166883	0,205,102
chr4	1164444	1167145	1	113	+	1164444	1167145	0,205,102
chr4	1164593	1164714	1	1	+	1164593	1164714	0,255,127
chr4	1164672	1167145	1	1	+	1164672	1167145	0,205,102
chr4	1164689	1165641	1	504	+	1164689	1165641	16,78,139
chr4	1164689	1165883	1	17	+	1164689	1165883	0,205,102
chr4	1164689	1165993	2	2	+	1164689	1165993	0,205,102
chr4	1164689	1166789	1	3	+	1164689	1166789	0,205,102
chr4	1164689	1166883	1	6	+	1164689	1166883	0,205,102
chr4	1164689	1167037	1	1	+	1164689	1167037	0,205,102
chr4	1164689	1167145	1	362	+	1164689	1167145	0,205,102
chr4	1164689	1167654	1	1	+	1164689	1167654	0,205,102
chr4	1164689	1168214	1	1	+	1164689	1168214	0,205,102
chr4	1164689	1168545	1	2	+	1164689	1168545	0,205,102
chr4	1164689	1168654	1	1	+	1164689	1168654	0,205,102
chr4	1164689	1168726	1	8	+	1164689	1168726	0,205,102
chr4	116476	118497	1	1	+	116476	118497	0,205,102
chr4	1165676	1165883	1	30	+	1165676	1165883	16,78,139
chr4	1165676	1165993	1	2	+	1165676	1165993	0,205,102
chr4	1165676	1166789	1	1	+	1165676	1166789	0,205,102
chr4	1165676	1167138	1	1	+	1165676	1167138	0,205,102
chr4	1165676	1167145	1	52	+	1165676	1167145	0,205,102
chr4	1165676	1168726	1	5	+	1165676	1168726	0,205,102
chr4	1165679	1165883	1	113	+	1165679	1165883	0,205,102
chr4	1165679	1165993	1	1	+	1165679	1165993	0,205,102
chr4	1165679	1166789	1	4	+	1165679	1166789	0,205,102
chr4	1165679	1166883	1	5	+	1165679	1166883	0,205,102
chr4	1165679	1167145	1	138	+	1165679	1167145	0,205,102
chr4	1165679	1167158	1	1	+	1165679	1167158	0,205,102
chr4	1165679	1168654	1	1	+	1165679	1168654	0,205,102
chr4	1165679	1168726	1	3	+	1165679	1168726	0,205,102
chr4	1165706	1165883	1	6	+	1165706	1165883	0,205,102
chr4	1165897	1166789	1	3	+	1165897	1166789	0,205,102
chr4	1165897	1167145	1	4	+	1165897	1167145	0,205,102
chr4	1165917	1166789	1	3	+	1165917	1166789	0,205,102
chr4	1165917	1166883	1	1	+	1165917	1166883	0,205,102
chr4	1165917	1167145	1	91	+	1165917	1167145	16,78,139
chr4	1165931	1167084	1	1	+	1165931	1167084	0,255,127
chr4	1165973	1167145	1	2	+	1165973	1167145	0,205,102
chr4	1166015	1167145	1	2	+	1166015	1167145	0,205,102
chr4	1166793	1167145	1	30	+	1166793	1167145	0,205,102
chr4	1166801	1167138	1	1	+	1166801	1167138	0,205,102
chr4	1166801	1167145	2	2	+	1166801	1167145	0,205,102
chr4	116698	118497	1	5	+	116698	118497	0,205,102
chr4	116698	120081	1	1	+	116698	120081	0,205,102
chr4	116783	118497	1	30	+	116783	118497	0,205,102
chr4	116783	120081	2	2	+	116783	120081	0,205,102
chr4	1168171	1168654	1	60	+	1168171	1168654	0,205,102
chr4	1168171	1168726	1	10	+	1168171	1168726	0,205,102
chr4	1168171	1181933	1	1	+	1168171	1181933	0,205,102
chr4	1168194	1169429	1	1	+	1168194	1169429	0,205,102
chr4	1168194	1169664	1	107	+	1168194	1169664	16,78,139
chr4	116876	168201	1	3	+	116876	168201	0,205,102
chr4	1168813	1169429	1	1	+	1168813	1169429	0,205,102
chr4	1168869	1169379	1	2	+	1168869	1169379	0,205,102
chr4	1168869	1169429	1	94	+	1168869	1169429	16,78,139
chr4	1168869	1169441	1	1	+	1168869	1169441	0,205,102
chr4	1168869	1169664	1	2	+	1168869	1169664	0,205,102
chr4	1168948	1169429	1	6	+	1168948	1169429	0,205,102
chr4	1168963	1169429	1	1	+	1168963	1169429	0,205,102
chr4	116903	137140	1	1	+	116903	137140	0,255,127
chr4	116933	349502	1	1	+	116933	349502	0,255,127
chr4	1169348	1169664	1	1	+	1169348	1169664	0,205,102
chr4	1169463	1169664	1	284	+	1169463	1169664	16,78,139
chr4	1169708	1181535	1	1	+	1169708	1181535	0,205,102
chr4	1169763	1185937	1	1	+	1169763	1185937	0,205,102
chr4	1169789	1170016	1	2	+	1169789	1170016	0,205,102
chr4	1169789	1170650	1	5	+	1169789	1170650	0,205,102
chr4	1169789	1170875	1	4	+	1169789	1170875	0,205,102
chr4	1169789	1171263	1	14	+	1169789	1171263	0,205,102
chr4	1169789	1171283	1	423	+	1169789	1171283	16,78,139
chr4	1169789	1171289	1	7	+	1169789	1171289	0,205,102
chr4	1169789	1171959	1	93	+	1169789	1171959	0,205,102
chr4	1169789	1171962	1	67	+	1169789	1171962	0,205,102
chr4	1169789	1173846	1	29	+	1169789	1173846	0,205,102
chr4	1169789	1185121	2	2	+	1169789	1185121	0,205,102
chr4	1169789	1185557	1	165	+	1169789	1185557	16,78,139
chr4	1169789	1185771	1	1	+	1169789	1185771	0,205,102
chr4	1169789	1185937	1	321	+	1169789	1185937	0,205,102
chr4	1169789	1186083	1	3	+	1169789	1186083	0,205,102
chr4	1169789	1193825	1	3	+	1169789	1193825	0,205,102
chr4	1169789	1208197	1	1	+	1169789	1208197	0,205,102
chr4	116989	271944	1	1	+	116989	271944	0,255,127
chr4	116995	561304	1	1	+	116995	561304	0,255,127
chr4	1169987	1171283	1	1	+	1169987	1171283	0,205,102
chr4	1169987	1185557	1	1	+	1169987	1185557	0,205,102
chr4	1169987	1185937	2	2	+	1169987	1185937	0,205,102
chr4	1170490	1170976	2	2	+	1170490	1170976	0,255,127
chr4	1171197	1192349	1	1	+	1171197	1192349	0,255,127
chr4	1171289	1171959	1	79	+	1171289	1171959	0,205,102
chr4	1171289	1171962	1	97	+	1171289	1171962	0,205,102
chr4	1171289	1185557	1	1	+	1171289	1185557	0,205,102
chr4	1171289	1185937	1	1	+	1171289	1185937	0,205,102
chr4	117207	117725	1	1	+	117207	117725	0,255,127
chr4	1173227	1201723	1	1	+	1173227	1201723	0,205,102
chr4	1173884	1185557	1	3	+	1173884	1185557	0,205,102
chr4	117390	349100	1	1	+	117390	349100	0,255,127
chr4	1173952	1176671	1	1	+	1173952	1176671	0,205,102
chr4	1173952	1185557	1	3	+	1173952	1185557	0,205,102
chr4	117407	118004	1	1	+	117407	118004	0,255,127
chr4	117474	270323	1	1	+	117474	270323	0,255,127
chr4	117631	204837	1	1	+	117631	204837	0,255,127
[truncated: 99,912 more rows]
