# Supplementary material for: Deep sequencing the circadian and diurnal transcriptome ofDrosophilabrain
Source: HighWire-hosted journal article supplement (doi:10.1101/gr.128876.111), 2012-04-03
Supplement: Table_S12d.xlsx [file Table_S12d.xlsx]

## Sheet: Sheet1
chrUextra	17575856	17576271	1	1	+	17575856	17576271	0,255,127
chrUextra	17575856	17576349	1	1	+	17575856	17576349	0,205,102
chrUextra	17575856	17576612	1	3	+	17575856	17576612	0,255,127
chrUextra	17575858	17576196	1	3	+	17575858	17576196	0,255,127
chrUextra	17575858	17576217	1	1	+	17575858	17576217	0,205,102
chrUextra	17575858	17576222	1	2	+	17575858	17576222	0,255,127
chrUextra	17575858	17576346	1	1	+	17575858	17576346	0,255,127
chrUextra	17575883	17576737	1	2	+	17575883	17576737	0,255,127
chrUextra	17575905	17576486	1	1	+	17575905	17576486	0,255,127
chrUextra	17576112	17695997	1	1	+	17576112	17695997	0,255,127
chrUextra	17576112	17806243	1	1	+	17576112	17806243	0,255,127
chrUextra	17576112	17850734	1	1	+	17576112	17850734	0,255,127
chrUextra	17576120	17850734	1	56	+	17576120	17850734	0,255,127
chrUextra	17576148	17695939	1	1	+	17576148	17695939	0,255,127
chrUextra	17576171	17595526	1	1	+	17576171	17595526	0,255,127
chrUextra	17576189	17595512	1	1	+	17576189	17595512	0,255,127
chrUextra	17576195	17705942	1	38	+	17576195	17705942	0,255,127
chrUextra	17576195	17850588	1	1	+	17576195	17850588	0,255,127
chrUextra	17576202	17850559	1	1	+	17576202	17850559	0,255,127
chrUextra	17576209	17697416	1	1	+	17576209	17697416	0,255,127
chrUextra	17576285	17750883	1	1	+	17576285	17750883	0,255,127
chrUextra	17576314	17705739	1	1	+	17576314	17705739	0,255,127
chrUextra	17576395	17705610	1	1	+	17576395	17705610	0,255,127
chrUextra	17576415	17595649	1	1	+	17576415	17595649	0,255,127
chrUextra	17576428	17705680	1	1	+	17576428	17705680	0,255,127
chrUextra	17576441	17705710	1	1	+	17576441	17705710	0,255,127
chrUextra	17576470	17647594	1	1	+	17576470	17647594	0,255,127
chrUextra	17576474	17595526	1	1	+	17576474	17595526	0,255,127
chrUextra	17576474	17705678	1	8	+	17576474	17705678	0,255,127
chrUextra	17576480	17705678	1	1	+	17576480	17705678	0,255,127
chrUextra	17576489	17705693	1	1	+	17576489	17705693	0,255,127
chrUextra	17576491	17705689	1	1	+	17576491	17705689	0,255,127
chrUextra	17576502	17595530	1	1	+	17576502	17595530	0,255,127
chrUextra	17576502	17665008	1	1	+	17576502	17665008	0,255,127
chrUextra	17576518	17696327	1	1	+	17576518	17696327	0,255,127
chrUextra	17576521	17595642	1	1	+	17576521	17595642	0,255,127
chrUextra	17576529	17705615	2	2	+	17576529	17705615	0,255,127
chrUextra	17576535	17705615	1	1	+	17576535	17705615	0,255,127
chrUextra	17576543	17933232	2	2	+	17576543	17933232	0,255,127
chrUextra	17576547	17577106	1	1	+	17576547	17577106	0,255,127
chrUextra	17576555	17696309	1	1	+	17576555	17696309	0,255,127
chrUextra	17576559	17660528	1	1	+	17576559	17660528	0,255,127
chrUextra	17576559	17751427	1	1	+	17576559	17751427	0,255,127
chrUextra	17576561	17696359	1	1	+	17576561	17696359	0,255,127
chrUextra	17576565	17751434	1	12	+	17576565	17751434	0,255,127
chrUextra	17576579	17751437	1	1	+	17576579	17751437	0,255,127
chrUextra	17576630	17595500	1	1	+	17576630	17595500	0,205,102
chrUextra	17576630	17665008	1	1	+	17576630	17665008	0,255,127
chrUextra	17576637	17598226	1	2	+	17576637	17598226	0,205,102
chrUextra	17576637	17696359	1	1	+	17576637	17696359	0,255,127
chrUextra	17576640	17595526	1	1	+	17576640	17595526	0,255,127
chrUextra	17576663	17595512	2	2	+	17576663	17595512	0,255,127
chrUextra	17576730	17751424	1	1	+	17576730	17751424	0,255,127
chrUextra	17576734	17705406	1	1	+	17576734	17705406	0,255,127
chrUextra	17576886	17971366	1	1	+	17576886	17971366	0,255,127
chrUextra	17577532	17725430	1	1	+	17577532	17725430	0,255,127
chrUextra	17578247	17580383	1	1	+	17578247	17580383	0,255,127
chrUextra	17578249	17579890	1	1	+	17578249	17579890	0,255,127
chrUextra	17578253	17580381	2	2	+	17578253	17580381	0,255,127
chrUextra	17578255	17580386	1	1	+	17578255	17580386	0,255,127
chrUextra	17578262	17580392	1	2	+	17578262	17580392	0,255,127
chrUextra	17578309	17580227	1	1	+	17578309	17580227	0,255,127
chrUextra	17578314	17580284	1	1	+	17578314	17580284	0,255,127
chrUextra	17578314	17580321	1	1	+	17578314	17580321	0,255,127
chrUextra	17578328	17580250	1	1	+	17578328	17580250	0,255,127
chrUextra	17579867	17580307	1	3	+	17579867	17580307	0,255,127
chrUextra	17579898	17580347	1	1	+	17579898	17580347	0,255,127
chrUextra	17579917	17580294	1	1	+	17579917	17580294	0,255,127
chrUextra	17579917	17580357	1	6	+	17579917	17580357	0,205,102
chrUextra	17579924	17580280	2	2	+	17579924	17580280	0,255,127
chrUextra	17580274	17595526	1	1	+	17580274	17595526	0,255,127
chrUextra	17580331	17738257	1	1	+	17580331	17738257	0,255,127
chrUextra	17587028	17717289	1	2	+	17587028	17717289	0,255,127
chrUextra	17588546	17599069	1	1	+	17588546	17599069	0,255,127
chrUextra	1758872	2043132	1	1	+	1758872	2043132	0,205,102
chrUextra	17590952	17595494	2	2	+	17590952	17595494	0,255,127
chrUextra	1759144	2043165	1	1	+	1759144	2043165	0,255,127
chrUextra	17592839	17603719	1	1	+	17592839	17603719	0,255,127
chrUextra	17592882	17603763	1	1	+	17592882	17603763	0,255,127
chrUextra	17592911	17597894	1	1	+	17592911	17597894	0,255,127
chrUextra	17592911	17603792	1	1	+	17592911	17603792	0,255,127
chrUextra	17592937	17603694	1	5	+	17592937	17603694	0,255,127
chrUextra	17593007	17595912	1	2	+	17593007	17595912	0,255,127
chrUextra	17593007	17597853	1	1	+	17593007	17597853	0,255,127
chrUextra	17593015	17597796	1	1	+	17593015	17597796	0,205,102
chrUextra	17593015	17603694	1	4	+	17593015	17603694	0,205,102
chrUextra	17593056	17603579	1	17	+	17593056	17603579	0,255,127
chrUextra	17593060	17593195	1	1	+	17593060	17593195	0,255,127
chrUextra	17593064	17596122	1	1	+	17593064	17596122	0,255,127
chrUextra	17593100	17595965	1	6	+	17593100	17595965	0,205,102
chrUextra	17593106	17597691	1	24	+	17593106	17597691	0,255,127
chrUextra	17593136	17598191	1	1	+	17593136	17598191	0,255,127
chrUextra	17593150	17593300	1	1	+	17593150	17593300	0,255,127
chrUextra	17593150	17603489	1	7	+	17593150	17603489	0,205,102
chrUextra	17593152	17598191	1	1	+	17593152	17598191	0,255,127
chrUextra	17593174	17597716	1	27	+	17593174	17597716	0,255,127
chrUextra	17593185	17603524	1	4	+	17593185	17603524	0,205,102
chrUextra	17593185	17649236	1	18	+	17593185	17649236	0,205,102
chrUextra	17593191	17649212	1	1	+	17593191	17649212	0,255,127
chrUextra	17593220	17597716	1	3	+	17593220	17597716	0,255,127
chrUextra	17593220	17603443	1	2	+	17593220	17603443	0,255,127
chrUextra	17593220	17649155	1	3	+	17593220	17649155	0,255,127
chrUextra	17593220	17974521	1	1	+	17593220	17974521	0,255,127
chrUextra	17593231	17649166	2	2	+	17593231	17649166	0,255,127
chrUextra	17593240	17598634	1	4	+	17593240	17598634	0,255,127
chrUextra	17593249	17593805	1	1	+	17593249	17593805	0,255,127
chrUextra	17593250	17593717	1	1	+	17593250	17593717	0,255,127
chrUextra	17593259	17595493	1	2	+	17593259	17595493	0,255,127
chrUextra	17593259	17598634	2	2	+	17593259	17598634	0,255,127
chrUextra	17593265	17595500	1	1	+	17593265	17595500	0,205,102
chrUextra	17593288	17598695	1	1	+	17593288	17598695	0,255,127
chrUextra	17593307	17974586	1	1	+	17593307	17974586	0,255,127
chrUextra	17593310	17598695	1	1	+	17593310	17598695	0,255,127
chrUextra	17593344	17595524	1	1	+	17593344	17595524	0,255,127
chrUextra	17593432	17595524	1	1	+	17593432	17595524	0,255,127
chrUextra	17593687	17595570	1	1	+	17593687	17595570	0,255,127
chrUextra	17594028	17676247	1	1	+	17594028	17676247	0,205,102
chrUextra	17594762	17595316	1	1	+	17594762	17595316	0,255,127
chrUextra	17594824	17595333	1	4	+	17594824	17595333	0,255,127
chrUextra	17594839	17595303	1	1	+	17594839	17595303	0,255,127
chrUextra	17594849	17595380	1	1	+	17594849	17595380	0,255,127
chrUextra	17594849	17595384	1	2	+	17594849	17595384	0,255,127
chrUextra	17594899	17595309	1	1	+	17594899	17595309	0,255,127
chrUextra	17594938	17595333	1	1	+	17594938	17595333	0,255,127
chrUextra	17594988	17595300	1	1	+	17594988	17595300	0,255,127
chrUextra	17594990	17595300	1	1	+	17594990	17595300	0,255,127
chrUextra	17594991	17595300	1	4	+	17594991	17595300	0,255,127
chrUextra	17594992	17595526	1	1	+	17594992	17595526	0,255,127
chrUextra	17595009	17595325	1	5	+	17595009	17595325	0,255,127
chrUextra	17595009	17595390	1	1	+	17595009	17595390	0,255,127
chrUextra	17595011	17595333	1	1	+	17595011	17595333	0,205,102
chrUextra	17595011	17595339	1	1	+	17595011	17595339	0,205,102
chrUextra	17595011	17595382	1	1	+	17595011	17595382	0,255,127
chrUextra	17595012	17595333	1	1	+	17595012	17595333	0,255,127
chrUextra	17595014	17595400	1	1	+	17595014	17595400	0,255,127
chrUextra	17595026	17595374	1	1	+	17595026	17595374	0,255,127
chrUextra	17595036	17595398	1	4	+	17595036	17595398	0,255,127
chrUextra	17595040	17595358	1	1	+	17595040	17595358	0,205,102
chrUextra	17595044	17595404	2	2	+	17595044	17595404	0,255,127
chrUextra	17595052	17595368	1	1	+	17595052	17595368	0,205,102
chrUextra	17595201	17595526	1	1	+	17595201	17595526	0,255,127
chrUextra	17595210	17595366	1	1	+	17595210	17595366	0,255,127
chrUextra	17595216	17598202	1	1	+	17595216	17598202	0,255,127
chrUextra	17595216	17645635	1	1	+	17595216	17645635	0,255,127
chrUextra	17595216	17645665	1	80	+	17595216	17645665	0,255,127
chrUextra	17595216	17653252	1	3	+	17595216	17653252	0,255,127
chrUextra	17595216	17717456	1	2	+	17595216	17717456	0,255,127
chrUextra	17595216	17985141	1	1	+	17595216	17985141	0,255,127
chrUextra	17595216	17985210	1	1	+	17595216	17985210	0,255,127
chrUextra	17595219	17645585	1	4	+	17595219	17645585	0,205,102
chrUextra	17595219	17645638	1	68	+	17595219	17645638	0,255,127
chrUextra	17595219	17645652	1	90	+	17595219	17645652	0,255,127
chrUextra	17595219	17653225	1	1	+	17595219	17653225	0,255,127
chrUextra	17595219	17653239	1	1	+	17595219	17653239	0,255,127
chrUextra	17595219	17817702	1	1	+	17595219	17817702	0,255,127
chrUextra	17595219	17817716	1	1	+	17595219	17817716	0,255,127
chrUextra	17595219	17985130	1	7	+	17595219	17985130	0,205,102
chrUextra	17595219	17985183	1	2	+	17595219	17985183	0,255,127
chrUextra	17595219	17985197	1	1	+	17595219	17985197	0,255,127
chrUextra	17595220	17645616	1	1	+	17595220	17645616	0,255,127
chrUextra	17595239	17817824	1	2	+	17595239	17817824	0,205,102
chrUextra	17595245	17598309	1	19	+	17595245	17598309	0,205,102
chrUextra	17595261	17717289	1	1	+	17595261	17717289	0,255,127
chrUextra	17595268	17645608	1	26	+	17595268	17645608	0,255,127
chrUextra	17595268	17653195	1	2	+	17595268	17653195	0,255,127
chrUextra	17595268	17985153	1	1	+	17595268	17985153	0,255,127
chrUextra	17595272	17598294	1	21	+	17595272	17598294	0,255,127
chrUextra	17595273	17717289	1	2	+	17595273	17717289	0,255,127
chrUextra	17595275	17598156	1	1	+	17595275	17598156	0,255,127
chrUextra	17595275	17645615	1	2	+	17595275	17645615	0,255,127
chrUextra	17595275	17660856	2	2	+	17595275	17660856	0,255,127
chrUextra	17595275	17817679	2	6	+	17595275	17817679	0,255,127
chrUextra	17595278	17697776	1	4	+	17595278	17697776	0,255,127
chrUextra	17595286	17645672	1	1	+	17595286	17645672	0,255,127
chrUextra	17595298	17595526	2	2	+	17595298	17595526	0,255,127
chrUextra	17595298	17598271	1	9	+	17595298	17598271	0,255,127
chrUextra	17595298	17598304	1	1	+	17595298	17598304	0,255,127
chrUextra	17595298	17598351	1	1	+	17595298	17598351	0,255,127
chrUextra	17595298	17645665	1	3	+	17595298	17645665	0,255,127
chrUextra	17595298	17664887	1	1	+	17595298	17664887	0,255,127
chrUextra	17595298	17751120	1	1	+	17595298	17751120	0,255,127
chrUextra	17595298	17933457	1	1	+	17595298	17933457	0,255,127
chrUextra	17595300	17598210	1	2	+	17595300	17598210	0,255,127
chrUextra	17595300	17598362	1	1	+	17595300	17598362	0,255,127
chrUextra	17595300	17645676	1	3	+	17595300	17645676	0,255,127
chrUextra	17595300	17660490	2	2	+	17595300	17660490	0,205,102
chrUextra	17595306	17598512	1	1	+	17595306	17598512	0,255,127
chrUextra	17595306	17660528	1	1	+	17595306	17660528	0,255,127
chrUextra	17595308	17595524	1	1	+	17595308	17595524	0,255,127
chrUextra	17595308	17595526	1	1	+	17595308	17595526	0,255,127
chrUextra	17595308	17598252	1	2	+	17595308	17598252	0,255,127
chrUextra	17595308	17598265	1	1	+	17595308	17598265	0,255,127
chrUextra	17595312	17598221	1	2	+	17595312	17598221	0,255,127
chrUextra	17595317	17598226	1	150	+	17595317	17598226	0,205,102
chrUextra	17595317	17645579	1	16	+	17595317	17645579	0,205,102
chrUextra	17595317	17653166	1	2	+	17595317	17653166	0,205,102
chrUextra	17595317	17933223	1	1	+	17595317	17933223	0,205,102
chrUextra	17595317	17985124	1	1	+	17595317	17985124	0,205,102
chrUextra	17595319	17598291	1	1	+	17595319	17598291	0,255,127
chrUextra	17595319	17622999	1	1	+	17595319	17622999	0,255,127
chrUextra	17595319	17717289	1	1	+	17595319	17717289	0,255,127
chrUextra	17595322	17598265	1	1	+	17595322	17598265	0,255,127
chrUextra	17595322	17598273	1	6	+	17595322	17598273	0,255,127
chrUextra	17595323	17717289	1	1	+	17595323	17717289	0,255,127
chrUextra	17595332	17598288	1	2	+	17595332	17598288	0,255,127
chrUextra	17595332	17598354	1	7	+	17595332	17598354	0,255,127
chrUextra	17595332	17653139	1	18	+	17595332	17653139	0,255,127
chrUextra	17595335	17595526	1	1	+	17595335	17595526	0,255,127
chrUextra	17595335	17598271	1	3	+	17595335	17598271	0,255,127
chrUextra	17595335	17598307	1	1	+	17595335	17598307	0,255,127
chrUextra	17595336	17598187	1	1	+	17595336	17598187	0,255,127
chrUextra	17595338	17598273	1	25	+	17595338	17598273	0,255,127
chrUextra	17595338	17598294	1	4	+	17595338	17598294	0,255,127
chrUextra	17595341	17598748	1	1	+	17595341	17598748	0,255,127
chrUextra	17595342	17598226	1	1	+	17595342	17598226	0,205,102
chrUextra	17595353	17717289	1	1	+	17595353	17717289	0,255,127
chrUextra	17595355	17598291	1	12	+	17595355	17598291	0,255,127
chrUextra	17595355	17598328	1	3	+	17595355	17598328	0,255,127
chrUextra	17595359	17595524	1	3	+	17595359	17595524	0,255,127
chrUextra	17595360	17598243	1	1	+	17595360	17598243	0,255,127
chrUextra	17595361	17598210	1	2	+	17595361	17598210	0,255,127
chrUextra	17595361	17622946	1	1	+	17595361	17622946	0,255,127
chrUextra	17595372	17645665	2	2	+	17595372	17645665	0,255,127
chrUextra	17595372	17653252	2	2	+	17595372	17653252	0,255,127
chrUextra	17595374	17598318	1	1	+	17595374	17598318	0,255,127
chrUextra	17595374	17598328	1	13	+	17595374	17598328	0,255,127
chrUextra	17595374	17653113	1	1	+	17595374	17653113	0,255,127
chrUextra	17595374	17660856	1	1	+	17595374	17660856	0,255,127
chrUextra	17595378	17595526	1	1	+	17595378	17595526	0,255,127
chrUextra	17595383	17598265	1	40	+	17595383	17598265	0,255,127
chrUextra	17595383	17598266	1	4	+	17595383	17598266	0,255,127
chrUextra	17595383	17653050	1	1	+	17595383	17653050	0,255,127
chrUextra	17595394	17597771	1	1	+	17595394	17597771	0,255,127
chrUextra	17595400	17597988	1	2	+	17595400	17597988	0,205,102
chrUextra	17595400	17598171	2	2	+	17595400	17598171	0,255,127
chrUextra	17595400	17598309	1	26	+	17595400	17598309	0,205,102
chrUextra	17595400	17660837	2	2	+	17595400	17660837	0,205,102
chrUextra	17595400	17696334	1	1	+	17595400	17696334	0,205,102
chrUextra	17595405	17598279	1	1	+	17595405	17598279	0,255,127
chrUextra	17595412	17598342	1	1	+	17595412	17598342	0,255,127
chrUextra	17595412	17640131	1	1	+	17595412	17640131	0,255,127
chrUextra	17595416	17597996	1	7	+	17595416	17597996	0,255,127
chrUextra	17595416	17598326	1	2	+	17595416	17598326	0,255,127
chrUextra	17595424	17598254	1	1	+	17595424	17598254	0,255,127
chrUextra	17595424	17598745	1	1	+	17595424	17598745	0,255,127
chrUextra	17595424	17603424	1	1	+	17595424	17603424	0,255,127
chrUextra	17595424	17664854	1	1	+	17595424	17664854	0,255,127
chrUextra	17595435	17597996	1	1	+	17595435	17597996	0,255,127
chrUextra	17595435	17598307	1	1	+	17595435	17598307	0,255,127
chrUextra	17595435	17627222	1	1	+	17595435	17627222	0,255,127
chrUextra	17595435	17660516	1	17	+	17595435	17660516	0,255,127
chrUextra	17595435	17660517	1	1	+	17595435	17660517	0,255,127
chrUextra	17595435	17665062	1	2	+	17595435	17665062	0,255,127
chrUextra	17595439	17597716	2	2	+	17595439	17597716	0,255,127
chrUextra	17595439	17598150	1	41	+	17595439	17598150	0,255,127
chrUextra	17595439	17598175	2	2	+	17595439	17598175	0,255,127
chrUextra	17595439	17598248	1	1	+	17595439	17598248	0,255,127
chrUextra	17595439	17603439	1	1	+	17595439	17603439	0,255,127
chrUextra	17595441	17598307	1	1	+	17595441	17598307	0,255,127
chrUextra	17595443	17598152	1	1	+	17595443	17598152	0,255,127
chrUextra	17595449	17595671	1	1	+	17595449	17595671	0,255,127
chrUextra	17595449	17623052	2	2	+	17595449	17623052	0,255,127
chrUextra	17595451	17696359	1	1	+	17595451	17696359	0,255,127
chrUextra	17595451	17840817	1	1	+	17595451	17840817	0,255,127
chrUextra	17595455	17597971	106	1304	+	17595455	17597971	0,255,127
chrUextra	17595455	17597996	1	8	+	17595455	17597996	0,255,127
chrUextra	17595455	17598099	1	142	+	17595455	17598099	0,255,127
chrUextra	17595455	17598103	1	1	+	17595455	17598103	0,255,127
chrUextra	17595455	17598125	1	1	+	17595455	17598125	0,255,127
chrUextra	17595455	17603869	1	5	+	17595455	17603869	0,255,127
chrUextra	17595455	17622963	1	1	+	17595455	17622963	0,255,127
chrUextra	17595455	17645643	1	1	+	17595455	17645643	0,255,127
chrUextra	17595455	17652756	1	1	+	17595455	17652756	0,255,127
chrUextra	17595455	17799080	1	1	+	17595455	17799080	0,255,127
chrUextra	17595459	17598183	1	1	+	17595459	17598183	0,255,127
chrUextra	17595465	17598151	1	8	+	17595465	17598151	0,255,127
chrUextra	17595465	17598175	1	20	+	17595465	17598175	0,255,127
chrUextra	17595470	17597996	1	16	+	17595470	17597996	0,255,127
chrUextra	17595470	17598125	1	4	+	17595470	17598125	0,255,127
chrUextra	17595474	17598184	1	1	+	17595474	17598184	0,255,127
chrUextra	17595475	17598129	1	8	+	17595475	17598129	0,255,127
chrUextra	17595475	17598161	1	33	+	17595475	17598161	0,255,127
chrUextra	17595478	17595680	1	1	+	17595478	17595680	0,255,127
chrUextra	17595497	17598151	1	4	+	17595497	17598151	0,255,127
chrUextra	17595501	17598034	1	1	+	17595501	17598034	0,255,127
chrUextra	17595501	17598156	1	5	+	17595501	17598156	0,255,127
chrUextra	17595501	17603932	1	1	+	17595501	17603932	0,255,127
chrUextra	17595510	17598125	2	2	+	17595510	17598125	0,255,127
chrUextra	17595512	17598125	1	2	+	17595512	17598125	0,255,127
chrUextra	17595514	17717289	1	1	+	17595514	17717289	0,255,127
chrUextra	17595518	17598052	1	1	+	17595518	17598052	0,255,127
chrUextra	17595518	17598089	1	1	+	17595518	17598089	0,255,127
chrUextra	17595522	17598055	1	103	+	17595522	17598055	0,255,127
chrUextra	17595522	17652840	1	1	+	17595522	17652840	0,255,127
chrUextra	17595522	17975031	1	1	+	17595522	17975031	0,255,127
chrUextra	17595523	17598171	1	1	+	17595523	17598171	0,255,127
chrUextra	17595527	17598084	1	1	+	17595527	17598084	0,255,127
chrUextra	17595527	17598171	1	4	+	17595527	17598171	0,255,127
chrUextra	17595537	17598108	1	1	+	17595537	17598108	0,255,127
chrUextra	17595537	17840849	1	1	+	17595537	17840849	0,255,127
chrUextra	17595542	17597971	1	1	+	17595542	17597971	0,255,127
chrUextra	17595542	17598099	1	3	+	17595542	17598099	0,255,127
chrUextra	17595542	17598103	1	1	+	17595542	17598103	0,255,127
chrUextra	17595542	17696359	1	1	+	17595542	17696359	0,255,127
chrUextra	17595542	17697386	4	4	+	17595542	17697386	0,255,127
chrUextra	17595546	17596231	1	1	+	17595546	17596231	0,255,127
chrUextra	17595556	17596135	1	1	+	17595556	17596135	0,255,127
chrUextra	17595571	17596113	1	1	+	17595571	17596113	0,255,127
chrUextra	17595573	17598108	1	5	+	17595573	17598108	0,255,127
chrUextra	17595580	17596135	1	5	+	17595580	17596135	0,255,127
chrUextra	17595580	17596274	1	2	+	17595580	17596274	0,255,127
chrUextra	17595580	17597934	1	1	+	17595580	17597934	0,255,127
chrUextra	17595580	17598669	1	3	+	17595580	17598669	0,255,127
chrUextra	17595580	17627225	1	1	+	17595580	17627225	0,255,127
chrUextra	17595580	17808752	1	1	+	17595580	17808752	0,255,127
chrUextra	17595583	17596133	1	1	+	17595583	17596133	0,255,127
chrUextra	17595587	17596133	1	1	+	17595587	17596133	0,255,127
chrUextra	17595587	17597985	1	1	+	17595587	17597985	0,255,127
chrUextra	17595588	17603907	1	3	+	17595588	17603907	0,255,127
chrUextra	17595592	17598013	1	3	+	17595592	17598013	0,255,127
chrUextra	17595592	17598021	1	9	+	17595592	17598021	0,255,127
chrUextra	17595592	17598326	2	2	+	17595592	17598326	0,255,127
chrUextra	17595592	17603911	2	2	+	17595592	17603911	0,255,127
chrUextra	17595592	17603919	1	4	+	17595592	17603919	0,255,127
chrUextra	17595604	17596123	1	1	+	17595604	17596123	0,255,127
chrUextra	17595605	17596124	1	6	+	17595605	17596124	0,255,127
chrUextra	17595605	17598034	1	1	+	17595605	17598034	0,255,127
chrUextra	17595605	17603932	1	1	+	17595605	17603932	0,255,127
chrUextra	17595607	17604071	1	3	+	17595607	17604071	0,255,127
chrUextra	17595607	17604075	1	1	+	17595607	17604075	0,255,127
chrUextra	17595613	17596124	1	3	+	17595613	17596124	0,255,127
chrUextra	17595613	17596128	1	1	+	17595613	17596128	0,255,127
chrUextra	17595613	17597961	1	1	+	17595613	17597961	0,255,127
chrUextra	17595613	17598034	1	7	+	17595613	17598034	0,255,127
chrUextra	17595617	17596128	1	2	+	17595617	17596128	0,255,127
chrUextra	17595617	17598038	1	3	+	17595617	17598038	0,255,127
chrUextra	17595617	17603936	1	4	+	17595617	17603936	0,255,127
chrUextra	17595618	17596124	2	2	+	17595618	17596124	0,255,127
chrUextra	17595618	17598108	1	2	+	17595618	17598108	0,255,127
chrUextra	17595625	17596185	2	2	+	17595625	17596185	0,255,127
chrUextra	17595626	17598015	1	1	+	17595626	17598015	0,255,127
chrUextra	17595626	17604080	1	1	+	17595626	17604080	0,255,127
chrUextra	17595630	17598171	1	3	+	17595630	17598171	0,255,127
chrUextra	17595630	17598210	1	2	+	17595630	17598210	0,255,127
chrUextra	17595638	17598226	1	5	+	17595638	17598226	0,205,102
chrUextra	17595638	17603909	1	1	+	17595638	17603909	0,205,102
chrUextra	17595638	17603932	1	1	+	17595638	17603932	0,255,127
chrUextra	17595645	17598000	1	1	+	17595645	17598000	0,255,127
chrUextra	17595645	17598008	1	5	+	17595645	17598008	0,255,127
chrUextra	17595645	17603906	1	2	+	17595645	17603906	0,255,127
chrUextra	17595653	17603898	1	1	+	17595653	17603898	0,255,127
chrUextra	17595655	17598171	1	120	+	17595655	17598171	0,255,127
chrUextra	17595655	17603886	1	2	+	17595655	17603886	0,205,102
chrUextra	17595660	17598000	1	1	+	17595660	17598000	0,255,127
chrUextra	17595689	17598043	1	5	+	17595689	17598043	0,255,127
chrUextra	17595732	17603763	1	1	+	17595732	17603763	0,255,127
chrUextra	17595737	17597832	1	1	+	17595737	17597832	0,255,127
chrUextra	17595750	17597724	1	3	+	17595750	17597724	0,255,127
chrUextra	17595763	17597853	1	6	+	17595763	17597853	0,255,127
chrUextra	17595773	17597769	1	1	+	17595773	17597769	0,255,127
chrUextra	17595787	17597796	1	10	+	17595787	17597796	0,255,127
chrUextra	17595798	17596339	1	1	+	17595798	17596339	0,255,127
chrUextra	17595823	17597754	1	2	+	17595823	17597754	0,255,127
chrUextra	17595849	17597774	1	1	+	17595849	17597774	0,255,127
chrUextra	17595857	17597853	1	1	+	17595857	17597853	0,255,127
chrUextra	17595865	17597796	1	7	+	17595865	17597796	0,205,102
chrUextra	17595867	17596128	1	1	+	17595867	17596128	0,255,127
chrUextra	17595873	17598191	1	1	+	17595873	17598191	0,255,127
chrUextra	17595876	17597087	1	1	+	17595876	17597087	0,255,127
chrUextra	17595879	17596128	1	1	+	17595879	17596128	0,255,127
chrUextra	17595884	17597706	1	1	+	17595884	17597706	0,255,127
chrUextra	17595887	17597710	1	1	+	17595887	17597710	0,255,127
chrUextra	17596035	17597865	1	1	+	17596035	17597865	0,255,127
chrUextra	17596096	17596223	1	3	+	17596096	17596223	0,255,127
chrUextra	17596333	17774757	1	1	+	17596333	17774757	0,255,127
chrUextra	17597188	17603579	1	1	+	17597188	17603579	0,255,127
chrUextra	17597190	17597712	1	1	+	17597190	17597712	0,255,127
chrUextra	17597210	17597712	2	2	+	17597210	17597712	0,255,127
chrUextra	17597610	17598498	1	2	+	17597610	17598498	0,255,127
chrUextra	17597616	17598589	1	1	+	17597616	17598589	0,255,127
chrUextra	17597616	17598680	2	2	+	17597616	17598680	0,255,127
chrUextra	17597616	17989018	1	1	+	17597616	17989018	0,255,127
chrUextra	17597624	17604383	1	1	+	17597624	17604383	0,255,127
chrUextra	17597629	17598720	1	1	+	17597629	17598720	0,255,127
chrUextra	17597629	17800524	1	1	+	17597629	17800524	0,255,127
chrUextra	17597631	17603508	1	1	+	17597631	17603508	0,255,127
chrUextra	17597631	17800526	2	2	+	17597631	17800526	0,205,102
chrUextra	17597633	17598520	1	22	+	17597633	17598520	0,255,127
chrUextra	17597633	17598526	1	1	+	17597633	17598526	0,255,127
chrUextra	17597634	17598652	1	4	+	17597634	17598652	0,255,127
chrUextra	17597637	17696354	1	1	+	17597637	17696354	0,255,127
chrUextra	17597654	17598214	1	1	+	17597654	17598214	0,255,127
chrUextra	17597654	17598499	1	1	+	17597654	17598499	0,255,127
chrUextra	17597654	17598503	2	8	+	17597654	17598503	0,255,127
chrUextra	17597654	17598530	1	10	+	17597654	17598530	0,255,127
chrUextra	17597661	17598493	1	1	+	17597661	17598493	0,255,127
chrUextra	17597661	17598645	1	1	+	17597661	17598645	0,205,102
chrUextra	17597661	17603431	1	3	+	17597661	17603431	0,205,102
chrUextra	17597661	17603524	1	1	+	17597661	17603524	0,205,102
chrUextra	17597661	17622952	3	3	+	17597661	17622952	0,205,102
chrUextra	17597661	17622999	1	1	+	17597661	17622999	0,255,127
chrUextra	17597661	17831688	1	1	+	17597661	17831688	0,255,127
chrUextra	17597662	17598594	1	1	+	17597662	17598594	0,255,127
chrUextra	17597669	17598552	1	1	+	17597669	17598552	0,255,127
chrUextra	17597696	17604398	1	3	+	17597696	17604398	0,255,127
chrUextra	17597706	17600170	1	1	+	17597706	17600170	0,255,127
chrUextra	17597708	17598979	1	1	+	17597708	17598979	0,255,127
chrUextra	17597724	17604320	1	1	+	17597724	17604320	0,255,127
chrUextra	17597744	17603641	1	1	+	17597744	17603641	0,255,127
chrUextra	17597809	17603694	1	1	+	17597809	17603694	0,205,102
chrUextra	17597834	17604258	1	1	+	17597834	17604258	0,255,127
chrUextra	17597837	17649406	1	1	+	17597837	17649406	0,255,127
chrUextra	17597849	17598691	1	1	+	17597849	17598691	0,255,127
chrUextra	17597849	17604222	1	2	+	17597849	17604222	0,255,127
chrUextra	17597885	17604106	1	1	+	17597885	17604106	0,255,127
chrUextra	17597923	17598507	1	1	+	17597923	17598507	0,255,127
chrUextra	17597927	17604139	1	1	+	17597927	17604139	0,255,127
chrUextra	17597948	17603614	1	1	+	17597948	17603614	0,255,127
chrUextra	17597953	17603886	1	1	+	17597953	17603886	0,255,127
chrUextra	17597975	17604093	1	1	+	17597975	17604093	0,255,127
chrUextra	17597975	17604129	1	15	+	17597975	17604129	0,255,127
chrUextra	17597976	17604089	1	1	+	17597976	17604089	0,255,127
chrUextra	17597977	17604089	1	2	+	17597977	17604089	0,255,127
chrUextra	17597979	17600305	1	1	+	17597979	17600305	0,255,127
chrUextra	17597979	17604092	1	66	+	17597979	17604092	0,255,127
chrUextra	17597979	17604102	1	1	+	17597979	17604102	0,255,127
chrUextra	17597981	17598499	1	2	+	17597981	17598499	0,255,127
chrUextra	17597981	17603917	1	1	+	17597981	17603917	0,255,127
chrUextra	17597981	17604135	1	2	+	17597981	17604135	0,255,127
chrUextra	17597981	17604139	1	30	+	17597981	17604139	0,255,127
chrUextra	17597981	17604164	1	1	+	17597981	17604164	0,205,102
chrUextra	17597981	17604255	1	1	+	17597981	17604255	0,255,127
chrUextra	17597984	17604092	1	1	+	17597984	17604092	0,255,127
chrUextra	17597984	17604102	1	1	+	17597984	17604102	0,255,127
chrUextra	17597988	17604075	1	5	+	17597988	17604075	0,255,127
chrUextra	17597988	17604171	1	3	+	17597988	17604171	0,255,127
chrUextra	17597994	17603894	1	1	+	17597994	17603894	0,255,127
chrUextra	17597994	17604071	1	2	+	17597994	17604071	0,255,127
chrUextra	17598009	17604096	1	1	+	17598009	17604096	0,255,127
chrUextra	17598012	17604071	1	4	+	17598012	17604071	0,255,127
chrUextra	17598012	17604076	1	1	+	17598012	17604076	0,255,127
chrUextra	17598012	17604092	1	1	+	17598012	17604092	0,255,127
chrUextra	17598012	17604148	1	1	+	17598012	17604148	0,255,127
chrUextra	17598016	17696401	1	1	+	17598016	17696401	0,255,127
chrUextra	17598025	17603919	1	1	+	17598025	17603919	0,255,127
chrUextra	17598025	17604071	1	1	+	17598025	17604071	0,255,127
chrUextra	17598025	17604118	1	2	+	17598025	17604118	0,255,127
chrUextra	17598027	17598505	1	1	+	17598027	17598505	0,255,127
chrUextra	17598029	17604375	1	1	+	17598029	17604375	0,255,127
chrUextra	17598042	17598157	1	1	+	17598042	17598157	0,255,127
chrUextra	17598042	17603944	1	1	+	17598042	17603944	0,255,127
chrUextra	17598050	17598590	1	1	+	17598050	17598590	0,255,127
chrUextra	17598052	17604152	1	1	+	17598052	17604152	0,255,127
chrUextra	17598056	17598210	2	2	+	17598056	17598210	0,255,127
chrUextra	17598056	17598660	1	1	+	17598056	17598660	0,255,127
chrUextra	17598071	17598604	1	1	+	17598071	17598604	0,255,127
chrUextra	17598075	17840888	1	5	+	17598075	17840888	0,255,127
chrUextra	17598087	17598669	1	1	+	17598087	17598669	0,255,127
chrUextra	17598095	17598695	1	1	+	17598095	17598695	0,255,127
chrUextra	17598100	17598328	1	1	+	17598100	17598328	0,255,127
chrUextra	17598100	17598495	1	248	+	17598100	17598495	0,255,127
chrUextra	17598100	17598498	1	8	+	17598100	17598498	0,255,127
chrUextra	17598100	17598499	1	1	+	17598100	17598499	0,255,127
chrUextra	17598100	17598502	1	8	+	17598100	17598502	0,255,127
chrUextra	17598100	17598503	1	15	+	17598100	17598503	0,255,127
chrUextra	17598100	17598504	1	18	+	17598100	17598504	0,255,127
chrUextra	17598100	17598507	1	8	+	17598100	17598507	0,255,127
chrUextra	17598100	17598517	1	20	+	17598100	17598517	0,255,127
chrUextra	17598100	17598518	1	6	+	17598100	17598518	0,255,127
chrUextra	17598100	17598530	1	6	+	17598100	17598530	0,255,127
chrUextra	17598100	17598531	1	1	+	17598100	17598531	0,255,127
chrUextra	17598100	17598541	1	1	+	17598100	17598541	0,255,127
chrUextra	17598100	17598580	1	15	+	17598100	17598580	0,255,127
chrUextra	17598100	17598581	1	17	+	17598100	17598581	0,255,127
chrUextra	17598100	17598589	1	1	+	17598100	17598589	0,255,127
chrUextra	17598100	17598590	2	2	+	17598100	17598590	0,255,127
chrUextra	17598100	17598591	1	1	+	17598100	17598591	0,255,127
chrUextra	17598100	17598603	1	1	+	17598100	17598603	0,255,127
chrUextra	17598100	17598607	1	22	+	17598100	17598607	0,255,127
chrUextra	17598100	17598623	1	1	+	17598100	17598623	0,255,127
chrUextra	17598100	17598624	1	1	+	17598100	17598624	0,255,127
chrUextra	17598100	17598626	1	1	+	17598100	17598626	0,255,127
chrUextra	17598100	17598634	1	1	+	17598100	17598634	0,255,127
chrUextra	17598100	17598645	3	3	+	17598100	17598645	0,255,127
chrUextra	17598100	17598657	1	56	+	17598100	17598657	0,255,127
chrUextra	17598100	17598660	1	20	+	17598100	17598660	0,255,127
chrUextra	17598100	17598665	2	4	+	17598100	17598665	0,255,127
chrUextra	17598100	17598689	1	3	+	17598100	17598689	0,255,127
chrUextra	17598100	17599110	1	1	+	17598100	17599110	0,255,127
chrUextra	17598100	17603290	1	1	+	17598100	17603290	0,255,127
chrUextra	17598100	17603396	1	2	+	17598100	17603396	0,255,127
chrUextra	17598100	17603438	1	1	+	17598100	17603438	0,255,127
chrUextra	17598100	17603521	1	1	+	17598100	17603521	0,255,127
chrUextra	17598100	17603540	1	1	+	17598100	17603540	0,255,127
chrUextra	17598100	17603906	1	1	+	17598100	17603906	0,255,127
chrUextra	17598100	17604233	1	1	+	17598100	17604233	0,255,127
chrUextra	17598100	17604397	1	16	+	17598100	17604397	0,255,127
chrUextra	17598100	17604398	1	9	+	17598100	17604398	0,255,127
chrUextra	17598100	17604411	1	2	+	17598100	17604411	0,255,127
chrUextra	17598100	17606259	1	1	+	17598100	17606259	0,255,127
chrUextra	17598102	17598267	1	1	+	17598102	17598267	0,255,127
chrUextra	17598102	17598493	1	8	+	17598102	17598493	0,255,127
chrUextra	17598102	17598495	1	163	+	17598102	17598495	0,255,127
chrUextra	17598102	17598498	1	12	+	17598102	17598498	0,255,127
chrUextra	17598102	17598499	1	4	+	17598102	17598499	0,255,127
chrUextra	17598102	17598502	1	1	+	17598102	17598502	0,255,127
chrUextra	17598102	17598503	1	11	+	17598102	17598503	0,255,127
chrUextra	17598102	17598504	1	17	+	17598102	17598504	0,255,127
chrUextra	17598102	17598518	1	30	+	17598102	17598518	0,255,127
chrUextra	17598102	17598607	1	3	+	17598102	17598607	0,255,127
chrUextra	17598102	17598623	1	1	+	17598102	17598623	0,255,127
chrUextra	17598102	17598624	1	8	+	17598102	17598624	0,255,127
chrUextra	17598102	17598634	1	1	+	17598102	17598634	0,255,127
chrUextra	17598102	17598657	1	1	+	17598102	17598657	0,255,127
chrUextra	17598102	17598660	1	176	+	17598102	17598660	0,255,127
chrUextra	17598102	17598665	2	4	+	17598102	17598665	0,255,127
chrUextra	17598102	17598674	1	5	+	17598102	17598674	0,255,127
chrUextra	17598102	17598689	1	25	+	17598102	17598689	0,255,127
chrUextra	17598102	17598690	1	11	+	17598102	17598690	0,205,102
chrUextra	17598102	17599120	1	1	+	17598102	17599120	0,255,127
chrUextra	17598102	17603452	1	1	+	17598102	17603452	0,255,127
chrUextra	17598102	17603460	1	1	+	17598102	17603460	0,255,127
chrUextra	17598102	17603529	1	1	+	17598102	17603529	0,255,127
chrUextra	17598102	17604234	1	1	+	17598102	17604234	0,255,127
chrUextra	17598102	17604348	1	2	+	17598102	17604348	0,255,127
chrUextra	17598102	17604355	1	1	+	17598102	17604355	0,255,127
chrUextra	17598102	17604375	1	3	+	17598102	17604375	0,255,127
chrUextra	17598102	17604380	1	23	+	17598102	17604380	0,255,127
chrUextra	17598102	17604390	1	8	+	17598102	17604390	0,255,127
chrUextra	17598102	17604590	1	1	+	17598102	17604590	0,255,127
chrUextra	17598102	17645656	1	1	+	17598102	17645656	0,255,127
chrUextra	17598104	17598493	1	1	+	17598104	17598493	0,255,127
chrUextra	17598104	17598495	1	39	+	17598104	17598495	0,255,127
chrUextra	17598104	17598498	1	30	+	17598104	17598498	0,255,127
chrUextra	17598104	17598499	1	183	+	17598104	17598499	0,255,127
chrUextra	17598104	17598507	1	5	+	17598104	17598507	0,255,127
chrUextra	17598104	17598530	1	1	+	17598104	17598530	0,255,127
chrUextra	17598104	17598581	1	1	+	17598104	17598581	0,255,127
chrUextra	17598104	17598629	1	1	+	17598104	17598629	0,255,127
chrUextra	17598104	17598660	1	1	+	17598104	17598660	0,255,127
chrUextra	17598104	17598665	1	7	+	17598104	17598665	0,255,127
chrUextra	17598104	17598676	1	2	+	17598104	17598676	0,255,127
chrUextra	17598104	17598719	2	2	+	17598104	17598719	0,255,127
chrUextra	17598104	17603479	1	1	+	17598104	17603479	0,255,127
chrUextra	17598104	17603896	1	1	+	17598104	17603896	0,255,127
chrUextra	17598104	17604355	1	1	+	17598104	17604355	0,255,127
chrUextra	17598104	17604415	1	1	+	17598104	17604415	0,255,127
chrUextra	17598105	17598495	2	2	+	17598105	17598495	0,255,127
chrUextra	17598105	17598499	1	1	+	17598105	17598499	0,255,127
chrUextra	17598105	17598618	1	1	+	17598105	17598618	0,255,127
chrUextra	17598106	17598507	1	1	+	17598106	17598507	0,255,127
chrUextra	17598106	17598520	1	1	+	17598106	17598520	0,255,127
chrUextra	17598106	17598667	1	1	+	17598106	17598667	0,255,127
chrUextra	17598106	17643230	2	2	+	17598106	17643230	0,255,127
chrUextra	17598106	17840937	1	23	+	17598106	17840937	0,255,127
chrUextra	17598108	17598505	1	1	+	17598108	17598505	0,255,127
chrUextra	17598110	17598499	1	4	+	17598110	17598499	0,255,127
chrUextra	17598110	17598680	1	1	+	17598110	17598680	0,205,102
chrUextra	17598110	17603438	1	1	+	17598110	17603438	0,255,127
chrUextra	17598110	17652914	1	1	+	17598110	17652914	0,255,127
chrUextra	17598110	17840784	1	1	+	17598110	17840784	0,255,127
chrUextra	17598114	17598503	1	7	+	17598114	17598503	0,255,127
chrUextra	17598114	17598684	1	1	+	17598114	17598684	0,255,127
chrUextra	17598114	17603898	1	5	+	17598114	17603898	0,255,127
chrUextra	17598114	17603906	1	1	+	17598114	17603906	0,255,127
chrUextra	17598119	17598502	1	1	+	17598119	17598502	0,255,127
chrUextra	17598119	17598689	1	1	+	17598119	17598689	0,255,127
chrUextra	17598126	17598610	1	1	+	17598126	17598610	0,205,102
chrUextra	17598126	17603409	1	2	+	17598126	17603409	0,205,102
chrUextra	17598126	17603489	1	1	+	17598126	17603489	0,205,102
chrUextra	17598126	17603883	1	1	+	17598126	17603883	0,205,102
chrUextra	17598126	17603909	1	1	+	17598126	17603909	0,205,102
chrUextra	17598126	17604391	1	4	+	17598126	17604391	0,205,102
chrUextra	17598126	17622931	1	1	+	17598126	17622931	0,205,102
chrUextra	17598128	17652956	1	3	+	17598128	17652956	0,255,127
chrUextra	17598132	17598512	1	1	+	17598132	17598512	0,255,127
chrUextra	17598132	17598616	1	6	+	17598132	17598616	0,255,127
chrUextra	17598132	17598694	1	1	+	17598132	17598694	0,255,127
chrUextra	17598132	17603508	1	1	+	17598132	17603508	0,255,127
chrUextra	17598132	17603947	1	1	+	17598132	17603947	0,255,127
chrUextra	17598133	17603415	1	5	+	17598133	17603415	0,255,127
chrUextra	17598133	17649127	1	1	+	17598133	17649127	0,255,127
chrUextra	17598134	17598495	1	2	+	17598134	17598495	0,255,127
chrUextra	17598134	17598618	1	8	+	17598134	17598618	0,255,127
chrUextra	17598134	17652862	1	1	+	17598134	17652862	0,255,127
chrUextra	17598136	17598517	1	1	+	17598136	17598517	0,255,127
chrUextra	17598136	17598593	1	1	+	17598136	17598593	0,255,127
chrUextra	17598136	17598724	1	1	+	17598136	17598724	0,255,127
chrUextra	17598156	17598643	1	1	+	17598156	17598643	0,255,127
chrUextra	17598157	17598737	1	1	+	17598157	17598737	0,205,102
chrUextra	17598158	17598710	1	1	+	17598158	17598710	0,255,127
chrUextra	17598160	17598594	1	1	+	17598160	17598594	0,255,127
chrUextra	17598165	17598503	1	1	+	17598165	17598503	0,255,127
chrUextra	17598173	17598516	1	1	+	17598173	17598516	0,255,127
chrUextra	17598173	17603911	2	2	+	17598173	17603911	0,255,127
chrUextra	17598183	17598589	1	1	+	17598183	17598589	0,255,127
chrUextra	17598194	17598610	1	1	+	17598194	17598610	0,255,127
chrUextra	17598194	17598633	1	1	+	17598194	17598633	0,255,127
chrUextra	17598194	17603911	1	1	+	17598194	17603911	0,255,127
chrUextra	17598195	17840849	1	1	+	17598195	17840849	0,255,127
chrUextra	17598199	17598498	1	72	+	17598199	17598498	0,255,127
chrUextra	17598199	17598512	1	1	+	17598199	17598512	0,255,127
chrUextra	17598199	17598634	1	2	+	17598199	17598634	0,255,127
chrUextra	17598200	17598626	1	1	+	17598200	17598626	0,255,127
chrUextra	17598200	17603567	1	1	+	17598200	17603567	0,255,127
chrUextra	17598202	17598502	1	1	+	17598202	17598502	0,255,127
chrUextra	17598209	17598634	1	1	+	17598209	17598634	0,255,127
chrUextra	17598209	17598671	1	2	+	17598209	17598671	0,205,102
chrUextra	17598209	17598767	1	3	+	17598209	17598767	0,205,102
chrUextra	17598209	17603886	1	1	+	17598209	17603886	0,205,102
chrUextra	17598209	17840823	1	17	+	17598209	17840823	0,205,102
chrUextra	17598216	17598652	1	1	+	17598216	17598652	0,255,127
chrUextra	17598221	17598682	1	1	+	17598221	17598682	0,255,127
chrUextra	17598222	17598577	1	1	+	17598222	17598577	0,255,127
chrUextra	17598222	17840835	1	1	+	17598222	17840835	0,255,127
chrUextra	17598228	17840808	1	1	+	17598228	17840808	0,255,127
chrUextra	17598236	17598691	1	1	+	17598236	17598691	0,255,127
chrUextra	17598250	17598626	1	1	+	17598250	17598626	0,255,127
chrUextra	17598250	17598759	1	1	+	17598250	17598759	0,255,127
chrUextra	17598258	17598503	1	5	+	17598258	17598503	0,255,127
chrUextra	17598258	17603580	1	1	+	17598258	17603580	0,255,127
chrUextra	17598260	17598505	1	2	+	17598260	17598505	0,255,127
chrUextra	17598405	17660504	1	1	+	17598405	17660504	0,255,127
chrUextra	17598412	17603577	1	1	+	17598412	17603577	0,255,127
chrUextra	17598412	17665013	2	2	+	17598412	17665013	0,255,127
chrUextra	17598412	17705606	1	1	+	17598412	17705606	0,255,127
chrUextra	17598413	17660513	1	3	+	17598413	17660513	0,255,127
chrUextra	17598416	17603450	1	12	+	17598416	17603450	0,255,127
chrUextra	17598416	17603528	2	2	+	17598416	17603528	0,255,127
chrUextra	17598416	17603579	1	269	+	17598416	17603579	0,255,127
chrUextra	17598416	17664963	1	1	+	17598416	17664963	0,255,127
chrUextra	17598416	17696396	1	1	+	17598416	17696396	0,255,127
chrUextra	17598418	17660519	1	1	+	17598418	17660519	0,255,127
chrUextra	17598419	17598560	1	2	+	17598419	17598560	0,205,102
chrUextra	17598421	17664967	1	1	+	17598421	17664967	0,255,127
chrUextra	17598426	17603637	1	1	+	17598426	17603637	0,255,127
chrUextra	17598430	17747958	1	1	+	17598430	17747958	0,255,127
chrUextra	17598434	17942226	1	1	+	17598434	17942226	0,255,127
chrUextra	17598436	17604391	1	1	+	17598436	17604391	0,205,102
chrUextra	17598460	17598610	1	1	+	17598460	17598610	0,205,102
chrUextra	17598460	17603489	1	2	+	17598460	17603489	0,205,102
chrUextra	17598460	17604391	1	9	+	17598460	17604391	0,205,102
chrUextra	17598470	17603524	1	23	+	17598470	17603524	0,205,102
chrUextra	17598492	17603443	1	3	+	17598492	17603443	0,255,127
chrUextra	17598494	17603332	1	1	+	17598494	17603332	0,255,127
chrUextra	17598502	17603482	1	2	+	17598502	17603482	0,255,127
chrUextra	17598502	17603516	1	1	+	17598502	17603516	0,255,127
chrUextra	17598505	17603484	1	10	+	17598505	17603484	0,255,127
chrUextra	17598510	17603415	1	4	+	17598510	17603415	0,205,102
chrUextra	17598510	17603489	1	914	+	17598510	17603489	0,205,102
chrUextra	17598510	17603564	1	12	+	17598510	17603564	0,205,102
chrUextra	17598510	17604391	1	1	+	17598510	17604391	0,205,102
chrUextra	17598510	17974567	1	1	+	17598510	17974567	0,205,102
chrUextra	17598518	17603454	1	2	+	17598518	17603454	0,255,127
chrUextra	17598518	17603532	1	2	+	17598518	17603532	0,255,127
chrUextra	17598526	17598729	1	1	+	17598526	17598729	0,255,127
chrUextra	17598526	17603367	1	1	+	17598526	17603367	0,255,127
chrUextra	17598526	17603489	1	9	+	17598526	17603489	0,255,127
chrUextra	17598526	17660504	1	1	+	17598526	17660504	0,255,127
chrUextra	17598528	17603608	1	1	+	17598528	17603608	0,255,127
chrUextra	17598534	17603439	1	6	+	17598534	17603439	0,255,127
chrUextra	17598534	17603614	1	5	+	17598534	17603614	0,255,127
chrUextra	17598545	17598775	1	1	+	17598545	17598775	0,255,127
chrUextra	17598545	17603431	1	2	+	17598545	17603431	0,205,102
chrUextra	17598545	17603508	1	1	+	17598545	17603508	0,255,127
chrUextra	17598545	17603524	1	133	+	17598545	17603524	0,205,102
chrUextra	17598545	17603574	1	3	+	17598545	17603574	0,205,102
chrUextra	17598550	17603460	1	1	+	17598550	17603460	0,255,127
chrUextra	17598550	17603529	1	5	+	17598550	17603529	0,255,127
chrUextra	17598551	17603500	1	36	+	17598551	17603500	0,255,127
chrUextra	17598552	17603445	1	7	+	17598552	17603445	0,255,127
chrUextra	17598558	17603450	1	1	+	17598558	17603450	0,255,127
chrUextra	17598558	17604467	1	1	+	17598558	17604467	0,255,127
chrUextra	17598562	17604099	1	1	+	17598562	17604099	0,255,127
chrUextra	17598563	17603450	1	26	+	17598563	17603450	0,255,127
chrUextra	17598572	17603482	1	1	+	17598572	17603482	0,255,127
chrUextra	17598574	17603460	1	6	+	17598574	17603460	0,255,127
chrUextra	17598575	17603445	1	2	+	17598575	17603445	0,255,127
chrUextra	17598580	17603443	1	79	+	17598580	17603443	0,255,127
chrUextra	17598580	17603487	1	2	+	17598580	17603487	0,255,127
chrUextra	17598580	17603516	1	1	+	17598580	17603516	0,255,127
chrUextra	17598580	17603614	1	1	+	17598580	17603614	0,255,127
chrUextra	17598580	17622950	1	2	+	17598580	17622950	0,255,127
chrUextra	17598580	17938866	1	1	+	17598580	17938866	0,255,127
chrUextra	17598582	17603424	1	2	+	17598582	17603424	0,255,127
chrUextra	17598583	17603359	1	3	+	17598583	17603359	0,255,127
chrUextra	17598584	17603359	1	14	+	17598584	17603359	0,255,127
chrUextra	17598584	17603434	1	3	+	17598584	17603434	0,255,127
chrUextra	17598589	17603365	1	33	+	17598589	17603365	0,255,127
chrUextra	17598589	17603459	1	1	+	17598589	17603459	0,255,127
chrUextra	17598589	17604390	1	1	+	17598589	17604390	0,255,127
chrUextra	17598591	17598765	1	2	+	17598591	17598765	0,255,127
chrUextra	17598591	17603367	1	38	+	17598591	17603367	0,205,102
chrUextra	17598591	17603454	1	21	+	17598591	17603454	0,255,127
chrUextra	17598591	17603542	1	1	+	17598591	17603542	0,255,127
chrUextra	17598591	17649166	1	1	+	17598591	17649166	0,255,127
chrUextra	17598594	17603280	1	1	+	17598594	17603280	0,205,102
chrUextra	17598595	17603415	1	1	+	17598595	17603415	0,255,127
chrUextra	17598600	17603439	1	1	+	17598600	17603439	0,255,127
chrUextra	17598600	17603450	1	6	+	17598600	17603450	0,255,127
chrUextra	17598600	17603459	1	1	+	17598600	17603459	0,255,127
chrUextra	17598600	17604550	1	4	+	17598600	17604550	0,255,127
chrUextra	17598600	17649162	1	1	+	17598600	17649162	0,255,127
chrUextra	17598603	17603454	1	1	+	17598603	17603454	0,255,127
chrUextra	17598603	17603489	1	5	+	17598603	17603489	0,205,102
chrUextra	17598608	17603450	1	2	+	17598608	17603450	0,255,127
chrUextra	17598608	17604505	1	2	+	17598608	17604505	0,255,127
chrUextra	17598610	17603338	1	2	+	17598610	17603338	0,255,127
chrUextra	17598612	17603348	1	2	+	17598612	17603348	0,255,127
chrUextra	17598613	17604510	1	1	+	17598613	17604510	0,255,127
chrUextra	17598615	17660513	1	1	+	17598615	17660513	0,255,127
chrUextra	17598619	17603439	1	1	+	17598619	17603439	0,255,127
chrUextra	17598619	17603451	1	2	+	17598619	17603451	0,255,127
chrUextra	17598619	17603524	1	3	+	17598619	17603524	0,205,102
chrUextra	17598619	17604550	2	2	+	17598619	17604550	0,255,127
chrUextra	17598619	17705611	1	1	+	17598619	17705611	0,255,127
chrUextra	17598622	17598753	1	1	+	17598622	17598753	0,255,127
chrUextra	17598648	17604611	1	1	+	17598648	17604611	0,255,127
chrUextra	17598648	17989123	1	3	+	17598648	17989123	0,255,127
chrUextra	17598661	17603328	1	2	+	17598661	17603328	0,255,127
chrUextra	17598661	17603438	1	1	+	17598661	17603438	0,255,127
chrUextra	17598661	17603450	1	2	+	17598661	17603450	0,255,127
chrUextra	17598661	17604590	1	1	+	17598661	17604590	0,255,127
chrUextra	17598667	17603320	1	1	+	17598667	17603320	0,255,127
chrUextra	17598667	17603443	1	34	+	17598667	17603443	0,205,102
chrUextra	17598668	17603338	1	1	+	17598668	17603338	0,255,127
chrUextra	17598669	17603338	1	6	+	17598669	17603338	0,255,127
chrUextra	17598669	17603445	1	33	+	17598669	17603445	0,255,127
chrUextra	17598669	17649157	1	1	+	17598669	17649157	0,255,127
chrUextra	17598670	17954652	1	1	+	17598670	17954652	0,255,127
chrUextra	17598675	17603328	1	7	+	17598675	17603328	0,255,127
chrUextra	17598675	17603450	1	7	+	17598675	17603450	0,255,127
chrUextra	17598675	17603451	1	5	+	17598675	17603451	0,255,127
chrUextra	17598675	17884716	1	1	+	17598675	17884716	0,255,127
chrUextra	17598686	17603318	2	2	+	17598686	17603318	0,255,127
chrUextra	17598686	17603422	1	1	+	17598686	17603422	0,255,127
chrUextra	17598686	17603460	1	3	+	17598686	17603460	0,255,127
chrUextra	17598688	17603424	1	2	+	17598688	17603424	0,255,127
chrUextra	17598696	17603328	1	1	+	17598696	17603328	0,255,127
chrUextra	17598696	17603365	1	5	+	17598696	17603365	0,255,127
chrUextra	17598696	17603366	1	2	+	17598696	17603366	0,255,127
chrUextra	17598696	17604606	1	3	+	17598696	17604606	0,255,127
chrUextra	17598702	17603286	1	1	+	17598702	17603286	0,255,127
chrUextra	17598702	17603540	1	1	+	17598702	17603540	0,255,127
chrUextra	17598704	17603426	1	1	+	17598704	17603426	0,255,127
chrUextra	17598705	17604611	1	1	+	17598705	17604611	0,255,127
chrUextra	17598706	17603359	1	54	+	17598706	17603359	0,255,127
chrUextra	17598714	17603367	1	1	+	17598714	17603367	0,255,127
chrUextra	17598714	17604620	1	1	+	17598714	17604620	0,255,127
chrUextra	17598740	17603415	1	1	+	17598740	17603415	0,255,127
chrUextra	17598754	17604635	1	2	+	17598754	17604635	0,255,127
chrUextra	17598754	17604636	1	5	+	17598754	17604636	0,205,102
chrUextra	17598774	17604719	1	2	+	17598774	17604719	0,255,127
chrUextra	17598778	17648912	1	1	+	17598778	17648912	0,255,127
chrUextra	17598778	17648942	1	1	+	17598778	17648942	0,255,127
chrUextra	17598820	17603359	1	1	+	17598820	17603359	0,255,127
chrUextra	17598845	17648848	1	1	+	17598845	17648848	0,205,102
chrUextra	17598868	17604596	1	1	+	17598868	17604596	0,255,127
chrUextra	17598886	17604616	1	1	+	17598886	17604616	0,255,127
chrUextra	17598898	17603719	1	1	+	17598898	17603719	0,255,127
chrUextra	17599035	17856502	1	1	+	17599035	17856502	0,205,102
chrUextra	17599045	17856454	1	1	+	17599045	17856454	0,255,127
chrUextra	17599050	17856459	1	1	+	17599050	17856459	0,255,127
chrUextra	17599050	17946657	1	1	+	17599050	17946657	0,255,127
chrUextra	17600059	17603886	1	1	+	17600059	17603886	0,205,102
chrUextra	17600215	17604102	1	1	+	17600215	17604102	0,255,127
chrUextra	17600246	17604679	1	1	+	17600246	17604679	0,255,127
chrUextra	176003	176122	1	1	+	176003	176122	0,255,127
chrUextra	17600903	17683558	1	1	+	17600903	17683558	0,255,127
chrUextra	17602824	17604545	1	1	+	17602824	17604545	0,255,127
chrUextra	17602856	17701410	1	1	+	17602856	17701410	0,255,127
chrUextra	17602891	17603400	1	1	+	17602891	17603400	0,255,127
chrUextra	17602911	17603338	1	1	+	17602911	17603338	0,255,127
chrUextra	17602911	17604568	1	1	+	17602911	17604568	0,255,127
chrUextra	17602912	17603415	1	1	+	17602912	17603415	0,255,127
chrUextra	17602912	17604568	1	1	+	17602912	17604568	0,255,127
chrUextra	17602914	17603403	1	1	+	17602914	17603403	0,255,127
chrUextra	17602914	17603409	1	1	+	17602914	17603409	0,255,127
chrUextra	17602917	17603346	1	1	+	17602917	17603346	0,255,127
chrUextra	17602963	17603469	1	1	+	17602963	17603469	0,255,127
chrUextra	17603205	17604696	1	2	+	17603205	17604696	0,205,102
chrUextra	17603216	17954743	1	3	+	17603216	17954743	0,255,127
chrUextra	17603218	17604703	2	2	+	17603218	17604703	0,255,127
chrUextra	17603228	17604692	1	1	+	17603228	17604692	0,255,127
chrUextra	17603232	17604717	1	3	+	17603232	17604717	0,255,127
chrUextra	17603234	17604719	1	3	+	17603234	17604719	0,255,127
chrUextra	17603234	17954759	1	1	+	17603234	17954759	0,255,127
chrUextra	17603244	17604731	1	1	+	17603244	17604731	0,255,127
chrUextra	17603246	17604731	1	1	+	17603246	17604731	0,255,127
chrUextra	17603267	17604607	1	41	+	17603267	17604607	0,255,127
chrUextra	17603267	17622911	1	1	+	17603267	17622911	0,205,102
chrUextra	17603269	17604635	1	1	+	17603269	17604635	0,255,127
chrUextra	17603275	17604616	1	2	+	17603275	17604616	0,255,127
chrUextra	17603281	17604653	1	2	+	17603281	17604653	0,255,127
chrUextra	17603291	17604635	1	1	+	17603291	17604635	0,255,127
chrUextra	17603305	17604561	1	1	+	17603305	17604561	0,205,102
chrUextra	17603311	17604607	1	1	+	17603311	17604607	0,255,127
chrUextra	17603315	17604620	1	1	+	17603315	17604620	0,255,127
chrUextra	17603316	17604600	1	2	+	17603316	17604600	0,255,127
chrUextra	17603324	17603482	1	1	+	17603324	17603482	0,255,127
chrUextra	17603330	17604635	1	1	+	17603330	17604635	0,255,127
chrUextra	17603334	17604600	1	1	+	17603334	17604600	0,255,127
chrUextra	17603334	17604645	1	1	+	17603334	17604645	0,255,127
chrUextra	17603339	17604550	1	2	+	17603339	17604550	0,255,127
chrUextra	17603339	17604605	1	1	+	17603339	17604605	0,255,127
chrUextra	17603339	17604616	1	10	+	17603339	17604616	0,255,127
chrUextra	17603339	17604635	1	16	+	17603339	17604635	0,255,127
chrUextra	17603343	17604554	1	204	+	17603343	17604554	0,255,127
chrUextra	17603343	17604596	1	43	+	17603343	17604596	0,255,127
chrUextra	17603343	17604684	1	111	+	17603343	17604684	0,255,127
chrUextra	17603344	17604499	1	2	+	17603344	17604499	0,255,127
chrUextra	17603350	17604616	1	1	+	17603350	17604616	0,255,127
chrUextra	17603350	17604634	1	1	+	17603350	17604634	0,255,127
chrUextra	17603350	17604692	1	1	+	17603350	17604692	0,255,127
chrUextra	17603352	17604636	1	1	+	17603352	17604636	0,255,127
chrUextra	17603354	17604499	1	4	+	17603354	17604499	0,255,127
chrUextra	17603354	17604534	1	5	+	17603354	17604534	0,255,127
chrUextra	17603354	17604583	1	7	+	17603354	17604583	0,255,127
chrUextra	17603354	17604607	1	41	+	17603354	17604607	0,255,127
chrUextra	17603361	17604510	1	1	+	17603361	17604510	0,255,127
chrUextra	17603365	17603944	1	2	+	17603365	17603944	0,255,127
chrUextra	17603367	17604596	1	15	+	17603367	17604596	0,255,127
chrUextra	17603367	17604616	1	1	+	17603367	17604616	0,255,127
chrUextra	17603377	17604705	1	3	+	17603377	17604705	0,255,127
chrUextra	17603382	17604505	1	1	+	17603382	17604505	0,255,127
chrUextra	17603382	17604539	1	10	+	17603382	17604539	0,255,127
chrUextra	17603382	17604605	1	1	+	17603382	17604605	0,255,127
chrUextra	17603382	17604635	1	1	+	17603382	17604635	0,255,127
chrUextra	17603382	17604692	1	4	+	17603382	17604692	0,255,127
chrUextra	17603389	17604476	1	10	+	17603389	17604476	0,205,102
chrUextra	17603389	17604526	1	23	+	17603389	17604526	0,205,102
chrUextra	17603389	17841423	1	1	+	17603389	17841423	0,205,102
chrUextra	17603391	17604534	1	1	+	17603391	17604534	0,255,127
chrUextra	17603394	17604510	1	1	+	17603394	17604510	0,255,127
chrUextra	17603396	17604607	1	660	+	17603396	17604607	0,255,127
chrUextra	17603401	17604568	1	724	+	17603401	17604568	0,255,127
chrUextra	17603405	17645649	1	1	+	17603405	17645649	0,255,127
chrUextra	17603408	17604468	1	14	+	17603408	17604468	0,205,102
chrUextra	17603408	17604610	1	1	+	17603408	17604610	0,255,127
chrUextra	17603409	17604611	1	1	+	17603409	17604611	0,255,127
chrUextra	17603410	17604411	1	1	+	17603410	17604411	0,255,127
chrUextra	17603410	17604618	1	1	+	17603410	17604618	0,255,127
chrUextra	17603411	17604568	1	1	+	17603411	17604568	0,255,127
chrUextra	17603416	17604554	1	1	+	17603416	17604554	0,255,127
chrUextra	17603416	17604587	1	1	+	17603416	17604587	0,255,127
chrUextra	17603416	17604596	1	9	+	17603416	17604596	0,255,127
chrUextra	17603418	17604542	1	2	+	17603418	17604542	0,255,127
chrUextra	17603424	17604561	1	30	+	17603424	17604561	0,205,102
chrUextra	17603440	17604467	1	2	+	17603440	17604467	0,255,127
chrUextra	17603440	17604550	1	1	+	17603440	17604550	0,255,127
chrUextra	17603440	17604605	1	2	+	17603440	17604605	0,255,127
chrUextra	17603440	17604616	1	1	+	17603440	17604616	0,255,127
chrUextra	17603444	17604568	1	1	+	17603444	17604568	0,255,127
chrUextra	17603445	17604600	1	3	+	17603445	17604600	0,255,127
chrUextra	17603451	17604550	1	2	+	17603451	17604550	0,255,127
chrUextra	17603451	17604596	1	12	+	17603451	17604596	0,255,127
chrUextra	17603451	17604606	1	1	+	17603451	17604606	0,255,127
chrUextra	17603451	17604616	1	1	+	17603451	17604616	0,255,127
chrUextra	17603453	17604446	1	44	+	17603453	17604446	0,255,127
chrUextra	17603453	17988958	1	1	+	17603453	17988958	0,255,127
chrUextra	17603457	17604467	1	38	+	17603457	17604467	0,255,127
chrUextra	17603474	17604561	1	14	+	17603474	17604561	0,205,102
chrUextra	17603479	17604432	1	2	+	17603479	17604432	0,255,127
chrUextra	17603479	17604539	1	255	+	17603479	17604539	0,255,127
chrUextra	17603480	17604471	1	1	+	17603480	17604471	0,255,127
chrUextra	17603482	17604383	1	1	+	17603482	17604383	0,255,127
chrUextra	17603482	17604542	1	19	+	17603482	17604542	0,205,102
chrUextra	17603483	17604493	1	31	+	17603483	17604493	0,255,127
chrUextra	17603483	17841390	1	3	+	17603483	17841390	0,255,127
chrUextra	17603504	17604497	1	15	+	17603504	17604497	0,255,127
chrUextra	17603508	17604414	1	6	+	17603508	17604414	0,255,127
chrUextra	17603508	17604419	1	1	+	17603508	17604419	0,255,127
chrUextra	17603508	17604467	1	1	+	17603508	17604467	0,255,127
chrUextra	17603514	17604467	1	2	+	17603514	17604467	0,255,127
chrUextra	17603514	17604506	1	1	+	17603514	17604506	0,255,127
chrUextra	17603514	17604596	1	6	+	17603514	17604596	0,255,127
chrUextra	17603514	17604616	1	1	+	17603514	17604616	0,255,127
chrUextra	17603516	17604421	1	1	+	17603516	17604421	0,255,127
chrUextra	17603527	17604468	1	3	+	17603527	17604468	0,255,127
chrUextra	17603531	17604436	1	6	+	17603531	17604436	0,255,127
chrUextra	17603532	17604510	1	1	+	17603532	17604510	0,255,127
chrUextra	17603532	17604568	2	5	+	17603532	17604568	0,255,127
chrUextra	17603534	17603953	1	1	+	17603534	17603953	0,255,127
chrUextra	17603535	17604075	1	1	+	17603535	17604075	0,255,127
chrUextra	17603536	17604442	1	2	+	17603536	17604442	0,255,127
chrUextra	17603536	17604516	1	1	+	17603536	17604516	0,255,127
chrUextra	17603539	17604526	1	1	+	17603539	17604526	0,255,127
chrUextra	17603552	17604242	2	2	+	17603552	17604242	0,255,127
chrUextra	17603552	17604356	1	4	+	17603552	17604356	0,255,127
chrUextra	17603552	17604415	1	1	+	17603552	17604415	0,255,127
chrUextra	17603552	17604419	1	22	+	17603552	17604419	0,255,127
chrUextra	17603552	17604446	1	25	+	17603552	17604446	0,255,127
chrUextra	17603559	17604356	1	1	+	17603559	17604356	0,255,127
chrUextra	17603559	17604561	1	1	+	17603559	17604561	0,205,102
chrUextra	17603559	17622952	1	5	+	17603559	17622952	0,205,102
chrUextra	17603567	17604468	1	1	+	17603567	17604468	0,255,127
chrUextra	17603567	17604596	1	1	+	17603567	17604596	0,255,127
chrUextra	17603594	17604391	1	1	+	17603594	17604391	0,255,127
chrUextra	17603612	17604281	1	1	+	17603612	17604281	0,255,127
chrUextra	17603612	17604299	1	2	+	17603612	17604299	0,255,127
chrUextra	17603622	17604182	1	1	+	17603622	17604182	0,255,127
chrUextra	17603622	17604320	1	2	+	17603622	17604320	0,255,127
chrUextra	17603637	17604203	1	4	+	17603637	17604203	0,255,127
chrUextra	17603651	17604073	1	1	+	17603651	17604073	0,255,127
chrUextra	17603651	17604263	1	5	+	17603651	17604263	0,255,127
chrUextra	17603663	17649406	1	16	+	17603663	17649406	0,255,127
chrUextra	17603663	17748026	1	1	+	17603663	17748026	0,255,127
chrUextra	17603687	17604299	1	4	+	17603687	17604299	0,255,127
chrUextra	17603692	17604215	1	1	+	17603692	17604215	0,255,127
chrUextra	17603692	17604218	1	1	+	17603692	17604218	0,255,127
chrUextra	17603692	17748069	1	1	+	17603692	17748069	0,255,127
chrUextra	17603708	17604263	1	1	+	17603708	17604263	0,255,127
chrUextra	17603716	17604191	1	3	+	17603716	17604191	0,255,127
chrUextra	17603716	17604192	1	1	+	17603716	17604192	0,255,127
chrUextra	17603728	17604192	1	1	+	17603728	17604192	0,255,127
chrUextra	17603728	17604203	1	13	+	17603728	17604203	0,255,127
chrUextra	17603729	17604106	1	1	+	17603729	17604106	0,255,127
chrUextra	17603732	17604106	1	3	+	17603732	17604106	0,255,127
chrUextra	17603732	17604210	1	2	+	17603732	17604210	0,255,127
chrUextra	17603732	17604258	1	2	+	17603732	17604258	0,255,127
chrUextra	17603735	17604210	1	2	+	17603735	17604210	0,255,127
chrUextra	17603735	17604258	2	2	+	17603735	17604258	0,255,127
chrUextra	17603740	17604215	1	2	+	17603740	17604215	0,255,127
chrUextra	17603740	17604218	1	1	+	17603740	17604218	0,255,127
chrUextra	17603747	17604222	1	48	+	17603747	17604222	0,255,127
chrUextra	17603747	17604607	1	1	+	17603747	17604607	0,255,127
chrUextra	17603747	17988734	1	1	+	17603747	17988734	0,255,127
chrUextra	17603754	17604304	1	1	+	17603754	17604304	0,255,127
chrUextra	17603758	17604210	1	1	+	17603758	17604210	0,255,127
chrUextra	17603758	17604234	1	2	+	17603758	17604234	0,255,127
chrUextra	17603759	17604210	1	1	+	17603759	17604210	0,255,127
chrUextra	17603768	17604148	1	1	+	17603768	17604148	0,255,127
chrUextra	17603768	17604328	1	6	+	17603768	17604328	0,255,127
chrUextra	17603783	17604106	1	3	+	17603783	17604106	0,255,127
chrUextra	17603783	17604109	1	1	+	17603783	17604109	0,255,127
chrUextra	17603783	17604148	1	1	+	17603783	17604148	0,255,127
chrUextra	17603794	17604089	1	8	+	17603794	17604089	0,255,127
chrUextra	17603798	17604128	1	1	+	17603798	17604128	0,255,127
chrUextra	17603802	17604088	1	1	+	17603802	17604088	0,255,127
chrUextra	17603802	17604102	1	1	+	17603802	17604102	0,255,127
chrUextra	17603802	17604167	1	3	+	17603802	17604167	0,255,127
chrUextra	17603811	17604071	1	30	+	17603811	17604071	0,255,127
chrUextra	17603811	17604118	1	10	+	17603811	17604118	0,255,127
chrUextra	17603811	17604125	1	5	+	17603811	17604125	0,255,127
chrUextra	17603811	17604191	1	2	+	17603811	17604191	0,255,127
chrUextra	17603812	17604102	1	1	+	17603812	17604102	0,255,127
chrUextra	17603815	17604073	1	1	+	17603815	17604073	0,255,127
chrUextra	17603815	17604088	1	1	+	17603815	17604088	0,255,127
chrUextra	17603815	17604102	1	2	+	17603815	17604102	0,255,127
chrUextra	17603818	17604076	1	1	+	17603818	17604076	0,255,127
chrUextra	17603819	17604077	1	1	+	17603819	17604077	0,255,127
chrUextra	17603821	17604077	1	116	+	17603821	17604077	0,255,127
chrUextra	17603821	17604099	1	1	+	17603821	17604099	0,255,127
chrUextra	17603822	17604080	1	3	+	17603822	17604080	0,255,127
chrUextra	17603822	17604106	1	1	+	17603822	17604106	0,255,127
chrUextra	17603822	17604109	1	1	+	17603822	17604109	0,255,127
chrUextra	17603822	17604152	1	11	+	17603822	17604152	0,255,127
chrUextra	17603823	17604080	1	34	+	17603823	17604080	0,255,127
chrUextra	17603825	17604135	1	5	+	17603825	17604135	0,255,127
chrUextra	17603825	17604139	1	6	+	17603825	17604139	0,255,127
chrUextra	17603832	17604077	1	1	+	17603832	17604077	0,255,127
chrUextra	17603832	17604116	1	1	+	17603832	17604116	0,255,127
chrUextra	17603832	17604135	1	2	+	17603832	17604135	0,255,127
chrUextra	17603832	17604139	1	11	+	17603832	17604139	0,255,127
chrUextra	17603832	17840924	1	1	+	17603832	17840924	0,255,127
chrUextra	17603838	17604215	1	1	+	17603838	17604215	0,255,127
chrUextra	17603841	17604125	1	1	+	17603841	17604125	0,205,102
chrUextra	17603841	17604167	1	1	+	17603841	17604167	0,255,127
chrUextra	17603841	17604215	1	11	+	17603841	17604215	0,255,127
chrUextra	17603844	17604103	1	1	+	17603844	17604103	0,255,127
chrUextra	17603844	17604167	1	14	+	17603844	17604167	0,255,127
chrUextra	17603844	17652927	1	1	+	17603844	17652927	0,255,127
chrUextra	17603846	17604092	1	2	+	17603846	17604092	0,255,127
chrUextra	17603847	17604099	1	1	+	17603847	17604099	0,255,127
chrUextra	17603848	17604102	1	1	+	17603848	17604102	0,255,127
chrUextra	17603848	17604135	1	1	+	17603848	17604135	0,255,127
chrUextra	17603848	17604148	1	1	+	17603848	17604148	0,255,127
chrUextra	17603851	17604167	1	3	+	17603851	17604167	0,255,127
chrUextra	17603851	17840940	1	1	+	17603851	17840940	0,255,127
chrUextra	17603851	17840942	1	1	+	17603851	17840942	0,255,127
chrUextra	17603854	17604156	1	1	+	17603854	17604156	0,255,127
chrUextra	17603854	17604282	1	1	+	17603854	17604282	0,205,102
chrUextra	17603857	17840937	1	4	+	17603857	17840937	0,255,127
chrUextra	17603857	17840955	1	1	+	17603857	17840955	0,255,127
chrUextra	17603858	17604073	1	43	+	17603858	17604073	0,255,127
chrUextra	17603858	17604080	1	1	+	17603858	17604080	0,255,127
chrUextra	17603861	17604075	1	3	+	17603861	17604075	0,255,127
chrUextra	17603861	17604076	1	1	+	17603861	17604076	0,255,127
chrUextra	17603861	17604092	1	1	+	17603861	17604092	0,255,127
chrUextra	17603861	17604118	1	3	+	17603861	17604118	0,205,102
chrUextra	17603861	17604156	1	11	+	17603861	17604156	0,255,127
chrUextra	17604000	17800385	1	1	+	17604000	17800385	0,255,127
chrUextra	17604006	17604585	1	7	+	17604006	17604585	0,255,127
chrUextra	17604006	17748164	1	2	+	17604006	17748164	0,255,127
chrUextra	17604006	17840847	1	1	+	17604006	17840847	0,255,127
chrUextra	17604006	17974910	1	18	+	17604006	17974910	0,255,127
chrUextra	17604014	17652794	1	2	+	17604014	17652794	0,255,127
chrUextra	17604018	17604432	1	1	+	17604018	17604432	0,255,127
chrUextra	17604018	17652773	1	2	+	17604018	17652773	0,255,127
chrUextra	17604018	17652798	2	2	+	17604018	17652798	0,255,127
chrUextra	17604018	17652806	1	4	+	17604018	17652806	0,255,127
chrUextra	17604018	17840847	1	1	+	17604018	17840847	0,255,127
chrUextra	17604031	17652819	1	1	+	17604031	17652819	0,255,127
chrUextra	17604031	17665015	1	1	+	17604031	17665015	0,255,127
chrUextra	17604033	17652912	1	1	+	17604033	17652912	0,255,127
chrUextra	17604035	17841003	1	1	+	17604035	17841003	0,255,127
chrUextra	17604039	17622989	1	1	+	17604039	17622989	0,255,127
chrUextra	17604039	17840955	1	1	+	17604039	17840955	0,255,127
chrUextra	17604041	17652773	2	2	+	17604041	17652773	0,205,102
chrUextra	17604043	17778927	1	1	+	17604043	17778927	0,205,102
chrUextra	17604044	17652893	1	1	+	17604044	17652893	0,255,127
chrUextra	17604052	17627508	1	3	+	17604052	17627508	0,255,127
chrUextra	17604052	17652758	1	1	+	17604052	17652758	0,255,127
chrUextra	17604052	17840835	1	1	+	17604052	17840835	0,255,127
chrUextra	17604052	17840847	1	1	+	17604052	17840847	0,255,127
chrUextra	17604052	17979795	1	1	+	17604052	17979795	0,255,127
chrUextra	17604054	17840845	1	1	+	17604054	17840845	0,255,127
chrUextra	17604056	17604640	1	1	+	17604056	17604640	0,255,127
chrUextra	17604056	17622998	1	1	+	17604056	17622998	0,255,127
chrUextra	17604064	17696354	1	1	+	17604064	17696354	0,205,102
chrUextra	17604067	17622999	1	1	+	17604067	17622999	0,255,127
chrUextra	17604067	17652824	1	2	+	17604067	17652824	0,255,127
chrUextra	17604071	17652793	1	1	+	17604071	17652793	0,255,127
chrUextra	17604072	17841017	1	1	+	17604072	17841017	0,255,127
chrUextra	17604074	17652800	1	1	+	17604074	17652800	0,255,127
chrUextra	17604081	17652956	1	7	+	17604081	17652956	0,255,127
chrUextra	17604091	17652798	1	1	+	17604091	17652798	0,255,127
chrUextra	17604158	17974841	3	3	+	17604158	17974841	0,255,127
chrUextra	17604176	17660513	3	3	+	17604176	17660513	0,255,127
chrUextra	17604187	17974870	1	1	+	17604187	17974870	0,255,127
chrUextra	17604199	17649378	1	1	+	17604199	17649378	0,255,127
chrUextra	17604213	17649406	1	5	+	17604213	17649406	0,255,127
chrUextra	17604213	17748026	3	3	+	17604213	17748026	0,255,127
chrUextra	17604227	17623027	1	1	+	17604227	17623027	0,255,127
chrUextra	17604256	17649371	1	7	+	17604256	17649371	0,205,102
chrUextra	17604256	17747991	1	1	+	17604256	17747991	0,205,102
chrUextra	17604268	17604428	1	1	+	17604268	17604428	0,255,127
chrUextra	17604291	17649406	1	5	+	17604291	17649406	0,205,102
chrUextra	17604309	17604432	1	1	+	17604309	17604432	0,255,127
chrUextra	17604332	17604634	1	1	+	17604332	17604634	0,255,127
chrUextra	17604332	17649162	1	1	+	17604332	17649162	0,255,127
chrUextra	17604332	17649291	1	1	+	17604332	17649291	0,255,127
chrUextra	17604334	17604468	1	1	+	17604334	17604468	0,255,127
chrUextra	17604337	17604568	1	1	+	17604337	17604568	0,255,127
chrUextra	17604346	17649150	1	1	+	17604346	17649150	0,255,127
chrUextra	17604369	17604505	1	1	+	17604369	17604505	0,255,127
chrUextra	17604376	17604526	1	1	+	17604376	17604526	0,205,102
chrUextra	17604376	17649201	2	2	+	17604376	17649201	0,205,102
chrUextra	17604381	17974652	1	1	+	17604381	17974652	0,255,127
chrUextra	17604383	17604934	1	1	+	17604383	17604934	0,255,127
chrUextra	17604386	17974602	1	2	+	17604386	17974602	0,205,102
chrUextra	17604408	17649155	1	3	+	17604408	17649155	0,255,127
chrUextra	17604421	17649196	1	2	+	17604421	17649196	0,255,127
chrUextra	17604426	17649201	1	24	+	17604426	17649201	0,205,102
chrUextra	17604426	17649276	1	1	+	17604426	17649276	0,205,102
chrUextra	17604426	17747896	1	8	+	17604426	17747896	0,205,102
chrUextra	17604426	17841354	1	2	+	17604426	17841354	0,205,102
chrUextra	17604426	17974567	1	3	+	17604426	17974567	0,205,102
chrUextra	17604442	17631430	1	1	+	17604442	17631430	0,255,127
chrUextra	17604442	17649201	1	1	+	17604442	17649201	0,255,127
chrUextra	17604442	17660513	1	3	+	17604442	17660513	0,255,127
chrUextra	17604442	17697621	1	1	+	17604442	17697621	0,255,127
chrUextra	17604442	17841318	1	1	+	17604442	17841318	0,255,127
chrUextra	17604450	17649151	1	4	+	17604450	17649151	0,255,127
chrUextra	17604450	17649326	1	1	+	17604450	17649326	0,255,127
chrUextra	17604450	17747946	1	1	+	17604450	17747946	0,255,127
chrUextra	17604461	17649236	1	61	+	17604461	17649236	0,205,102
chrUextra	17604461	17747856	1	18	+	17604461	17747856	0,205,102
chrUextra	17604461	17974602	1	1	+	17604461	17974602	0,205,102
chrUextra	17604466	17747861	2	2	+	17604466	17747861	0,255,127
chrUextra	17604467	17649212	1	8	+	17604467	17649212	0,255,127
chrUextra	17604467	17747832	1	2	+	17604467	17747832	0,255,127
chrUextra	17604470	17604980	1	1	+	17604470	17604980	0,255,127
chrUextra	17604479	17649162	1	2	+	17604479	17649162	0,255,127
chrUextra	17604479	17974528	1	4	+	17604479	17974528	0,255,127
chrUextra	17604488	17649058	1	1	+	17604488	17649058	0,255,127
chrUextra	17604488	17649194	1	1	+	17604488	17649194	0,255,127
chrUextra	17604488	17805885	2	2	+	17604488	17805885	0,255,127
chrUextra	17604490	17649194	1	1	+	17604490	17649194	0,255,127
chrUextra	17604496	17604879	1	1	+	17604496	17604879	0,255,127
chrUextra	17604496	17649155	1	6	+	17604496	17649155	0,255,127
chrUextra	17604496	17649228	1	2	+	17604496	17649228	0,255,127
chrUextra	17604496	17974521	1	1	+	17604496	17974521	0,255,127
chrUextra	17604500	17649071	1	4	+	17604500	17649071	0,255,127
chrUextra	17604500	17649146	1	1	+	17604500	17649146	0,255,127
chrUextra	17604505	17649076	1	1	+	17604505	17649076	0,255,127
chrUextra	17604505	17649077	1	9	+	17604505	17649077	0,255,127
chrUextra	17604505	17747697	1	1	+	17604505	17747697	0,255,127
chrUextra	17604507	17649079	1	11	+	17604507	17649079	0,205,102
chrUextra	17604507	17649166	1	6	+	17604507	17649166	0,255,127
chrUextra	17604507	17747901	1	1	+	17604507	17747901	0,255,127
chrUextra	17604516	17604680	2	2	+	17604516	17604680	0,255,127
chrUextra	17604516	17747782	1	3	+	17604516	17747782	0,255,127
chrUextra	17604524	17649162	1	3	+	17604524	17649162	0,255,127
chrUextra	17604526	17649050	1	2	+	17604526	17649050	0,255,127
chrUextra	17604526	17954609	1	2	+	17604526	17954609	0,255,127
chrUextra	17604528	17649060	1	1	+	17604528	17649060	0,255,127
chrUextra	17604529	17841407	1	1	+	17604529	17841407	0,255,127
chrUextra	17604535	17648862	1	1	+	17604535	17648862	0,255,127
chrUextra	17604535	17758047	1	1	+	17604535	17758047	0,255,127
chrUextra	17604560	17954648	1	1	+	17604560	17954648	0,255,127
chrUextra	17604564	17954652	1	36	+	17604564	17954652	0,255,127
chrUextra	17604565	17649071	1	1	+	17604565	17649071	0,255,127
chrUextra	17604577	17954631	1	1	+	17604577	17954631	0,255,127
chrUextra	17604580	17640015	1	1	+	17604580	17640015	0,255,127
chrUextra	17604580	17649152	1	1	+	17604580	17649152	0,255,127
chrUextra	17604613	17649040	1	1	+	17604613	17649040	0,255,127
chrUextra	17604613	17649077	1	3	+	17604613	17649077	0,255,127
chrUextra	17604613	17649078	1	2	+	17604613	17649078	0,255,127
chrUextra	17604622	17989123	1	1	+	17604622	17989123	0,255,127
chrUextra	17604623	17649071	1	65	+	17604623	17649071	0,255,127
chrUextra	17604631	17649079	1	1	+	17604631	17649079	0,255,127
chrUextra	17604631	17954661	1	3	+	17604631	17954661	0,255,127
chrUextra	17604648	17649211	1	1	+	17604648	17649211	0,255,127
chrUextra	17605194	17605741	1	1	+	17605194	17605741	0,255,127
chrUextra	17605375	17643655	1	1	+	17605375	17643655	0,205,102
chrUextra	17605459	17942819	1	2	+	17605459	17942819	0,255,127
chrUextra	17605771	17606717	1	13	+	17605771	17606717	0,255,127
chrUextra	17605771	17905798	1	1	+	17605771	17905798	0,255,127
chrUextra	17605791	17606654	1	1	+	17605791	17606654	0,255,127
chrUextra	17605829	17606714	1	1	+	17605829	17606714	0,255,127
chrUextra	17605834	17606102	2	2	+	17605834	17606102	0,255,127
chrUextra	17605857	17606788	1	1	+	17605857	17606788	0,255,127
chrUextra	17605866	17606829	1	1	+	17605866	17606829	0,255,127
chrUextra	17605887	17606677	1	1	+	17605887	17606677	0,255,127
chrUextra	17605908	17606694	1	1	+	17605908	17606694	0,255,127
chrUextra	17605930	17606829	1	1	+	17605930	17606829	0,255,127
chrUextra	17605957	17606780	1	1	+	17605957	17606780	0,255,127
chrUextra	17605960	17606783	1	5	+	17605960	17606783	0,255,127
chrUextra	17605967	17606850	1	1	+	17605967	17606850	0,255,127
chrUextra	17606022	17606973	1	3	+	17606022	17606973	0,255,127
chrUextra	17606046	17769659	1	1	+	17606046	17769659	0,255,127
chrUextra	17606051	17606994	1	6	+	17606051	17606994	0,255,127
chrUextra	17606073	17606664	1	1	+	17606073	17606664	0,255,127
chrUextra	17606141	17606613	1	1	+	17606141	17606613	0,255,127
chrUextra	17606213	17607119	1	1	+	17606213	17607119	0,255,127
chrUextra	17606221	17769681	1	1	+	17606221	17769681	0,255,127
chrUextra	17606506	17606927	1	1	+	17606506	17606927	0,255,127
chrUextra	17606612	18114598	1	1	+	17606612	18114598	0,255,127
chrUextra	17606696	17607389	1	1	+	17606696	17607389	0,255,127
chrUextra	17606729	17928711	2	2	+	17606729	17928711	0,255,127
chrUextra	17606751	17607019	2	2	+	17606751	17607019	0,255,127
chrUextra	17606972	17769712	1	1	+	17606972	17769712	0,255,127
chrUextra	17607030	17769673	1	2	+	17607030	17769673	0,255,127
chrUextra	17611365	17611495	1	16	+	17611365	17611495	0,255,127
chrUextra	17611377	17611495	1	1	+	17611377	17611495	0,255,127
chrUextra	17612409	17627506	1	1	+	17612409	17627506	0,205,102
chrUextra	17617862	17664876	1	1	+	17617862	17664876	0,255,127
chrUextra	17618168	17627221	1	1	+	17618168	17627221	0,255,127
chrUextra	17618168	17627223	1	1	+	17618168	17627223	0,255,127
chrUextra	17622817	17805094	1	1	+	17622817	17805094	0,255,127
chrUextra	17626568	17626779	1	1	+	17626568	17626779	0,255,127
chrUextra	17626830	17627217	1	1	+	17626830	17627217	0,255,127
chrUextra	17626831	17627217	1	1	+	17626831	17627217	0,255,127
chrUextra	17626840	17627217	1	1	+	17626840	17627217	0,255,127
chrUextra	17626842	17627217	1	1	+	17626842	17627217	0,255,127
chrUextra	17627138	17627506	1	1	+	17627138	17627506	0,255,127
chrUextra	17627421	17627786	1	7	+	17627421	17627786	0,255,127
chrUextra	17628599	17629062	1	1	+	17628599	17629062	0,255,127
chrUextra	17629560	17635504	1	1	+	17629560	17635504	0,255,127
chrUextra	17633024	17633183	1	5	+	17633024	17633183	0,205,102
chrUextra	17633039	17633183	1	5	+	17633039	17633183	0,205,102
chrUextra	17633123	17675349	1	1	+	17633123	17675349	0,255,127
chrUextra	17639252	17840933	1	1	+	17639252	17840933	0,255,127
chrUextra	17640222	17679127	2	2	+	17640222	17679127	0,255,127
chrUextra	17643274	17943172	2	2	+	17643274	17943172	0,255,127
chrUextra	17643335	17942888	1	1	+	17643335	17942888	0,255,127
chrUextra	17643469	17942930	1	1	+	17643469	17942930	0,255,127
chrUextra	17643637	17942832	1	1	+	17643637	17942832	0,255,127
chrUextra	17643640	17644220	1	40	+	17643640	17644220	0,255,127
chrUextra	17643899	17679404	1	1	+	17643899	17679404	0,255,127
chrUextra	17644278	17954648	1	1	+	17644278	17954648	0,255,127
chrUextra	17645061	17645602	1	2	+	17645061	17645602	0,255,127
chrUextra	17645132	17653111	1	1	+	17645132	17653111	0,255,127
chrUextra	17645177	17645666	1	3	+	17645177	17645666	0,255,127
chrUextra	17645182	17645632	1	1	+	17645182	17645632	0,255,127
chrUextra	17645245	17645645	1	1	+	17645245	17645645	0,255,127
chrUextra	17645245	17645690	1	1	+	17645245	17645690	0,255,127
chrUextra	1764530	1765066	1	1	+	1764530	1765066	0,205,102
chrUextra	17645352	17645638	1	1	+	17645352	17645638	0,255,127
chrUextra	17645354	17653133	1	1	+	17645354	17653133	0,255,127
chrUextra	1764537	1909732	1	1	+	1764537	1909732	0,255,127
chrUextra	17645485	17652773	1	1	+	17645485	17652773	0,205,102
chrUextra	17645515	17738291	2	2	+	17645515	17738291	0,255,127
chrUextra	17645521	17653079	1	1	+	17645521	17653079	0,255,127
chrUextra	17645555	17653157	1	1	+	17645555	17653157	0,255,127
chrUextra	17645571	17652793	3	3	+	17645571	17652793	0,255,127
chrUextra	17645573	17653192	2	2	+	17645573	17653192	0,255,127
chrUextra	17645602	17651021	1	1	+	17645602	17651021	0,205,102
chrUextra	17645603	17649127	1	8	+	17645603	17649127	0,255,127
chrUextra	17645606	17652987	1	1	+	17645606	17652987	0,255,127
chrUextra	17645618	17649115	1	1	+	17645618	17649115	0,255,127
chrUextra	17645619	17649098	1	1	+	17645619	17649098	0,255,127
chrUextra	17645633	17653236	1	1	+	17645633	17653236	0,255,127
chrUextra	17645715	17650888	1	1	+	17645715	17650888	0,255,127
chrUextra	1764580	1910882	1	1	+	1764580	1910882	0,255,127
chrUextra	17647124	17653125	1	1	+	17647124	17653125	0,255,127
chrUextra	1764746	1911206	1	1	+	1764746	1911206	0,255,127
chrUextra	1764746	1985800	1	3	+	1764746	1985800	0,255,127
chrUextra	1764753	1985788	1	1	+	1764753	1985788	0,255,127
chrUextra	1764753	2131224	1	1	+	1764753	2131224	0,255,127
chrUextra	1764776	1910106	1	1	+	1764776	1910106	0,255,127
chrUextra	1764840	1911011	1	1	+	1764840	1911011	0,255,127
chrUextra	17648677	17856478	1	1	+	17648677	17856478	0,255,127
chrUextra	17648693	17856449	1	1	+	17648693	17856449	0,255,127
chrUextra	17648694	17650526	1	2	+	17648694	17650526	0,255,127
chrUextra	17648758	17954925	1	1	+	17648758	17954925	0,255,127
chrUextra	17648778	18026720	1	1	+	17648778	18026720	0,255,127
chrUextra	1764885	1910963	1	1	+	1764885	1910963	0,255,127
chrUextra	17648880	17649115	2	2	+	17648880	17649115	0,255,127
chrUextra	17648883	17649108	1	1	+	17648883	17649108	0,255,127
chrUextra	17648892	18026570	1	1	+	17648892	18026570	0,205,102
chrUextra	17648898	17954811	1	1	+	17648898	17954811	0,205,102
chrUextra	17648910	18026456	1	1	+	17648910	18026456	0,255,127
chrUextra	17648930	17954743	1	1	+	17648930	17954743	0,255,127
chrUextra	17648930	18026576	1	1	+	17648930	18026576	0,255,127
chrUextra	17648979	17650821	1	1	+	17648979	17650821	0,205,102
chrUextra	17648979	17954648	1	2	+	17648979	17954648	0,255,127
chrUextra	17648987	17649150	1	1	+	17648987	17649150	0,255,127
chrUextra	17649006	17653081	1	1	+	17649006	17653081	0,255,127
chrUextra	17649027	17650896	1	8	+	17649027	17650896	0,255,127
chrUextra	17649027	17656821	1	1	+	17649027	17656821	0,255,127
chrUextra	17649028	18026416	1	1	+	17649028	18026416	0,255,127
chrUextra	17649033	17660513	1	1	+	17649033	17660513	0,255,127
chrUextra	17649036	17664896	1	10	+	17649036	17664896	0,255,127
chrUextra	17649042	17652927	1	2	+	17649042	17652927	0,255,127
chrUextra	17649051	17650962	1	1	+	17649051	17650962	0,255,127
chrUextra	17649051	17954676	1	1	+	17649051	17954676	0,255,127
chrUextra	17649055	18026370	1	1	+	17649055	18026370	0,255,127
chrUextra	17649062	17664896	1	1	+	17649062	17664896	0,255,127
chrUextra	17649066	17652972	1	1	+	17649066	17652972	0,255,127
chrUextra	17649066	17664967	1	1	+	17649066	17664967	0,255,127
chrUextra	17649066	17989119	1	1	+	17649066	17989119	0,255,127
chrUextra	17649079	17650827	1	1	+	17649079	17650827	0,255,127
chrUextra	17649108	17954648	1	1	+	17649108	17954648	0,255,127
chrUextra	17649111	17649562	1	1	+	17649111	17649562	0,205,102
chrUextra	17649112	17649562	1	1	+	17649112	17649562	0,255,127
chrUextra	17649116	17649639	1	3	+	17649116	17649639	0,255,127
chrUextra	17649116	17649640	1	1	+	17649116	17649640	0,255,127
chrUextra	17649116	17649655	1	1	+	17649116	17649655	0,255,127
chrUextra	17649136	17649286	1	1	+	17649136	17649286	0,205,102
chrUextra	17649136	17738140	1	1	+	17649136	17738140	0,255,127
chrUextra	17649165	17649673	2	2	+	17649165	17649673	0,255,127
chrUextra	17649165	17649750	1	14	+	17649165	17649750	0,255,127
chrUextra	17649186	17650862	1	1	+	17649186	17650862	0,205,102
chrUextra	17649186	17664908	1	1	+	17649186	17664908	0,205,102
chrUextra	17649186	17747856	1	3	+	17649186	17747856	0,205,102
chrUextra	17649186	17954658	2	2	+	17649186	17954658	0,205,102
chrUextra	17649191	17954580	1	2	+	17649191	17954580	0,255,127
chrUextra	17649192	17954551	1	1	+	17649192	17954551	0,255,127
chrUextra	17649216	17841394	1	1	+	17649216	17841394	0,255,127
chrUextra	17649226	17954657	1	1	+	17649226	17954657	0,255,127
chrUextra	17649229	17649596	1	2	+	17649229	17649596	0,255,127
chrUextra	17649247	17649750	1	2	+	17649247	17649750	0,255,127
chrUextra	17649253	17660513	1	1	+	17649253	17660513	0,255,127
chrUextra	17649264	17653252	1	1	+	17649264	17653252	0,255,127
chrUextra	17649264	17659930	1	1	+	17649264	17659930	0,255,127
chrUextra	17649264	17841253	1	1	+	17649264	17841253	0,255,127
chrUextra	17649271	17650862	1	9	+	17649271	17650862	0,205,102
chrUextra	17649271	17650909	1	1	+	17649271	17650909	0,255,127
chrUextra	17649271	17660519	1	1	+	17649271	17660519	0,205,102
chrUextra	17649271	17664958	1	1	+	17649271	17664958	0,205,102
chrUextra	17649306	17650849	1	1	+	17649306	17650849	0,255,127
chrUextra	1764942	1910907	1	1	+	1764942	1910907	0,255,127
chrUextra	1764974	1911346	1	1	+	1764974	1911346	0,255,127
chrUextra	17649880	17650470	1	1	+	17649880	17650470	0,205,102
chrUextra	1765042	1899842	1	1	+	1765042	1899842	0,255,127
chrUextra	17650620	17805343	1	1	+	17650620	17805343	0,255,127
chrUextra	17650801	17652831	1	2	+	17650801	17652831	0,255,127
chrUextra	17650803	17651356	1	1	+	17650803	17651356	0,255,127
chrUextra	17650805	17651142	1	1	+	17650805	17651142	0,255,127
chrUextra	17650812	17652899	1	1	+	17650812	17652899	0,255,127
chrUextra	17650822	17652881	1	1	+	17650822	17652881	0,255,127
chrUextra	17650833	17651374	1	1	+	17650833	17651374	0,255,127
chrUextra	17650844	17651370	1	1	+	17650844	17651370	0,255,127
chrUextra	17650847	17652828	1	1	+	17650847	17652828	0,255,127
chrUextra	17650847	17653252	1	1	+	17650847	17653252	0,255,127
chrUextra	17650849	17651430	1	1	+	17650849	17651430	0,255,127
chrUextra	17650852	17651017	1	1	+	17650852	17651017	0,255,127
chrUextra	17650862	17651424	1	1	+	17650862	17651424	0,255,127
chrUextra	17650868	17651435	1	1	+	17650868	17651435	0,255,127
chrUextra	17650873	17652819	1	1	+	17650873	17652819	0,255,127
chrUextra	17650883	17841318	1	1	+	17650883	17841318	0,255,127
chrUextra	1765090	1810289	1	1	+	1765090	1810289	0,255,127
chrUextra	17650914	17656891	1	7	+	17650914	17656891	0,255,127
chrUextra	17650924	17652819	1	1	+	17650924	17652819	0,255,127
chrUextra	1765103	1899861	1	9	+	1765103	1899861	0,255,127
chrUextra	1765109	1911461	1	1	+	1765109	1911461	0,255,127
chrUextra	1765207	1899998	1	1	+	1765207	1899998	0,255,127
chrUextra	1765209	1809651	1	1	+	1765209	1809651	0,255,127
chrUextra	17652670	17841003	1	1	+	17652670	17841003	0,255,127
chrUextra	17652710	17840977	1	1	+	17652710	17840977	0,255,127
chrUextra	17652728	17738268	1	1	+	17652728	17738268	0,255,127
chrUextra	17652735	17696387	1	1	+	17652735	17696387	0,255,127
chrUextra	17652748	17748230	1	1	+	17652748	17748230	0,255,127
chrUextra	17652752	17660742	1	1	+	17652752	17660742	0,255,127
chrUextra	17652752	17931197	1	1	+	17652752	17931197	0,255,127
chrUextra	17652766	17748249	1	1	+	17652766	17748249	0,255,127
chrUextra	17652769	17738268	1	1	+	17652769	17738268	0,255,127
chrUextra	17652777	17975031	2	2	+	17652777	17975031	0,255,127
chrUextra	17652792	17840849	1	1	+	17652792	17840849	0,255,127
chrUextra	17652824	17688478	1	1	+	17652824	17688478	0,255,127
chrUextra	17652841	17717308	1	5	+	17652841	17717308	0,255,127
chrUextra	17652861	17664859	1	1	+	17652861	17664859	0,255,127
chrUextra	17652868	17660501	1	1	+	17652868	17660501	0,255,127
chrUextra	17652874	17660719	1	1	+	17652874	17660719	0,255,127
chrUextra	17652875	17717289	1	1	+	17652875	17717289	0,255,127
chrUextra	17652881	17696303	1	1	+	17652881	17696303	0,255,127
chrUextra	17652881	17705665	1	2	+	17652881	17705665	0,255,127
chrUextra	17652881	18003313	2	2	+	17652881	18003313	0,255,127
chrUextra	17652885	17653242	1	3	+	17652885	17653242	0,255,127
chrUextra	17652885	17653243	1	1	+	17652885	17653243	0,255,127
chrUextra	17652885	17656725	1	1	+	17652885	17656725	0,255,127
chrUextra	17652885	17659971	1	1	+	17652885	17659971	0,255,127
chrUextra	17652885	17660490	1	1	+	17652885	17660490	0,255,127
chrUextra	17652885	17660528	1	2	+	17652885	17660528	0,255,127
chrUextra	17652885	17660856	1	1	+	17652885	17660856	0,255,127
chrUextra	17652885	17664876	1	4	+	17652885	17664876	0,255,127
chrUextra	17652885	17696345	1	1	+	17652885	17696345	0,255,127
chrUextra	17652885	17705602	1	1	+	17652885	17705602	0,255,127
chrUextra	17652885	17717289	1	1	+	17652885	17717289	0,255,127
chrUextra	17652885	17732080	1	1	+	17652885	17732080	0,255,127
chrUextra	17652885	17748238	1	1	+	17652885	17748238	0,255,127
chrUextra	17652885	17805750	1	1	+	17652885	17805750	0,255,127
chrUextra	17652887	17653243	2	2	+	17652887	17653243	0,255,127
chrUextra	17652895	17664792	1	2	+	17652895	17664792	0,255,127
chrUextra	17652895	17696292	1	1	+	17652895	17696292	0,255,127
chrUextra	17652895	17717300	1	1	+	17652895	17717300	0,255,127
chrUextra	17652899	17653252	1	3	+	17652899	17653252	0,255,127
chrUextra	17652899	17660710	1	1	+	17652899	17660710	0,255,127
chrUextra	17652899	17705648	1	1	+	17652899	17705648	0,255,127
chrUextra	17652899	17840788	2	2	+	17652899	17840788	0,255,127
chrUextra	17652906	17660541	1	1	+	17652906	17660541	0,255,127
chrUextra	17652907	17717289	1	1	+	17652907	17717289	0,255,127
chrUextra	17652911	17660490	1	1	+	17652911	17660490	0,205,102
chrUextra	17652913	17717289	1	2	+	17652913	17717289	0,255,127
chrUextra	17652917	17660496	1	3	+	17652917	17660496	0,255,127
chrUextra	17652917	17660551	1	1	+	17652917	17660551	0,255,127
chrUextra	17652917	17660553	1	3	+	17652917	17660553	0,255,127
chrUextra	17652917	17660703	1	11	+	17652917	17660703	0,255,127
chrUextra	17652917	17665030	1	2	+	17652917	17665030	0,255,127
chrUextra	17652917	17843577	1	1	+	17652917	17843577	0,255,127
chrUextra	17652919	17653277	1	1	+	17652919	17653277	0,255,127
chrUextra	17652950	17660711	1	1	+	17652950	17660711	0,255,127
chrUextra	17652979	17660567	1	1	+	17652979	17660567	0,255,127
chrUextra	17652984	17653529	1	1	+	17652984	17653529	0,255,127
chrUextra	17652985	17660513	1	1	+	17652985	17660513	0,255,127
chrUextra	17652994	17660731	1	1	+	17652994	17660731	0,255,127
chrUextra	17652998	17660730	1	1	+	17652998	17660730	0,255,127
chrUextra	17653020	17653539	1	1	+	17653020	17653539	0,255,127
chrUextra	17653029	17665008	1	1	+	17653029	17665008	0,255,127
chrUextra	17653037	17653625	1	1	+	17653037	17653625	0,255,127
chrUextra	17653043	17660742	1	3	+	17653043	17660742	0,255,127
chrUextra	17653047	17653633	1	1	+	17653047	17653633	0,255,127
chrUextra	17653066	17653544	1	1	+	17653066	17653544	0,255,127
chrUextra	17653096	17653580	1	1	+	17653096	17653580	0,255,127
chrUextra	17653099	17660854	1	1	+	17653099	17660854	0,255,127
chrUextra	17653130	17653299	1	1	+	17653130	17653299	0,255,127
chrUextra	17653158	17660503	1	1	+	17653158	17660503	0,255,127
chrUextra	17653166	17653573	1	1	+	17653166	17653573	0,255,127
chrUextra	17653168	17653614	1	1	+	17653168	17653614	0,255,127
chrUextra	17653190	17840849	1	2	+	17653190	17840849	0,255,127
chrUextra	17653191	17840849	1	3	+	17653191	17840849	0,255,127
chrUextra	17653193	17653539	1	1	+	17653193	17653539	0,205,102
chrUextra	17653193	17738322	1	1	+	17653193	17738322	0,255,127
chrUextra	17653198	17660490	1	2	+	17653198	17660490	0,255,127
chrUextra	17653201	17653541	2	2	+	17653201	17653541	0,255,127
chrUextra	17653201	17653701	1	1	+	17653201	17653701	0,255,127
chrUextra	17653201	17660530	1	1	+	17653201	17660530	0,255,127
chrUextra	17653202	17660519	1	1	+	17653202	17660519	0,255,127
chrUextra	17653205	17660530	1	1	+	17653205	17660530	0,255,127
chrUextra	17653206	17654729	1	1	+	17653206	17654729	0,255,127
chrUextra	17653206	17660567	1	3	+	17653206	17660567	0,255,127
chrUextra	17653209	17653719	1	1	+	17653209	17653719	0,255,127
chrUextra	17653256	17653589	1	1	+	17653256	17653589	0,255,127
chrUextra	1765354	1900144	1	1	+	1765354	1900144	0,205,102
chrUextra	1765362	1911483	1	5	+	1765362	1911483	0,255,127
chrUextra	17654717	17713677	2	2	+	17654717	17713677	0,255,127
chrUextra	17654732	17654860	1	1	+	17654732	17654860	0,255,127
chrUextra	17656308	17656881	1	1	+	17656308	17656881	0,255,127
chrUextra	17656683	17717289	1	1	+	17656683	17717289	0,255,127
chrUextra	17656693	17862917	1	1	+	17656693	17862917	0,255,127
chrUextra	17656703	17660854	1	1	+	17656703	17660854	0,255,127
chrUextra	17656721	17657133	2	2	+	17656721	17657133	0,255,127
chrUextra	17656765	17809808	1	1	+	17656765	17809808	0,255,127
chrUextra	17656771	17656936	1	1	+	17656771	17656936	0,255,127
chrUextra	17656794	17695987	1	1	+	17656794	17695987	0,255,127
chrUextra	17656850	17737883	1	1	+	17656850	17737883	0,255,127
chrUextra	17656858	17809818	1	1	+	17656858	17809818	0,255,127
chrUextra	17656867	17660730	1	1	+	17656867	17660730	0,255,127
chrUextra	17656882	17660490	1	1	+	17656882	17660490	0,205,102
chrUextra	17656887	17664854	1	1	+	17656887	17664854	0,255,127
chrUextra	17656893	17660541	1	1	+	17656893	17660541	0,255,127
chrUextra	17656893	17664859	1	1	+	17656893	17664859	0,255,127
chrUextra	17656910	17665001	1	1	+	17656910	17665001	0,255,127
chrUextra	17657175	17668141	2	2	+	17657175	17668141	0,255,127
chrUextra	17659336	17660979	1	1	+	17659336	17660979	0,255,127
chrUextra	17659903	17664862	1	1	+	17659903	17664862	0,205,102
chrUextra	17660023	17665242	1	1	+	17660023	17665242	0,205,102
chrUextra	17660044	17665008	1	1	+	17660044	17665008	0,255,127
chrUextra	17660187	17660715	1	1	+	17660187	17660715	0,255,127
chrUextra	17660310	17665112	1	2	+	17660310	17665112	0,255,127
chrUextra	17660330	17660874	1	1	+	17660330	17660874	0,255,127
chrUextra	17660335	17660846	1	1	+	17660335	17660846	0,255,127
chrUextra	17660348	17660528	1	2	+	17660348	17660528	0,255,127
chrUextra	17660353	17660868	1	3	+	17660353	17660868	0,255,127
chrUextra	17660355	17660876	1	2	+	17660355	17660876	0,255,127
chrUextra	17660363	17660894	1	1	+	17660363	17660894	0,255,127
chrUextra	17660371	17660719	1	1	+	17660371	17660719	0,255,127
chrUextra	17660380	17660719	1	9	+	17660380	17660719	0,255,127
chrUextra	17660380	17660900	1	1	+	17660380	17660900	0,255,127
chrUextra	17660381	17660719	10	580	+	17660381	17660719	0,255,127
chrUextra	17660392	17660719	1	1	+	17660392	17660719	0,255,127
chrUextra	17660396	17660719	1	1	+	17660396	17660719	0,255,127
chrUextra	17660413	17664941	1	26	+	17660413	17664941	0,255,127
chrUextra	17660413	17665001	1	1	+	17660413	17665001	0,255,127
chrUextra	17660413	17840817	1	1	+	17660413	17840817	0,255,127
chrUextra	17660420	17665009	1	8	+	17660420	17665009	0,255,127
chrUextra	17660420	17843556	1	1	+	17660420	17843556	0,255,127
chrUextra	17660428	17660907	1	7	+	17660428	17660907	0,255,127
chrUextra	17660428	17660915	1	1	+	17660428	17660915	0,255,127
chrUextra	17660428	17664918	1	36	+	17660428	17664918	0,255,127
chrUextra	17660428	17664958	1	1	+	17660428	17664958	0,255,127
chrUextra	17660428	17664997	1	2	+	17660428	17664997	0,255,127
chrUextra	17660428	17665013	1	4	+	17660428	17665013	0,255,127
chrUextra	17660428	18024334	1	1	+	17660428	18024334	0,255,127
chrUextra	17660430	17664920	1	1	+	17660430	17664920	0,255,127
chrUextra	17660433	17660714	1	1	+	17660433	17660714	0,255,127
chrUextra	17660433	17660826	1	1	+	17660433	17660826	0,255,127
chrUextra	17660433	17664997	1	1	+	17660433	17664997	0,255,127
chrUextra	17660434	17660715	1	2	+	17660434	17660715	0,255,127
chrUextra	17660434	17665023	1	1	+	17660434	17665023	0,255,127
chrUextra	17660434	17909301	1	1	+	17660434	17909301	0,255,127
chrUextra	17660435	17660719	1	1	+	17660435	17660719	0,255,127
chrUextra	17660435	17660846	1	1	+	17660435	17660846	0,255,127
chrUextra	17660435	17660938	1	1	+	17660435	17660938	0,255,127
chrUextra	17660435	17661745	5	5	+	17660435	17661745	0,255,127
chrUextra	17660435	17732000	1	10	+	17660435	17732000	0,255,127
chrUextra	17660436	17660569	1	1	+	17660436	17660569	0,255,127
chrUextra	17660436	17660719	1	1	+	17660436	17660719	0,255,127
chrUextra	17660436	17717289	1	15	+	17660436	17717289	0,255,127
chrUextra	17660437	17660580	1	5	+	17660437	17660580	0,255,127
chrUextra	17660437	17660719	1	77	+	17660437	17660719	0,255,127
chrUextra	17660437	17661020	1	1	+	17660437	17661020	0,255,127
chrUextra	17660437	17664971	1	16	+	17660437	17664971	0,255,127
chrUextra	17660437	17717289	1	34	+	17660437	17717289	0,255,127
chrUextra	17660439	17660745	1	1	+	17660439	17660745	0,255,127
chrUextra	17660439	17660834	1	1	+	17660439	17660834	0,255,127
chrUextra	17660439	17660837	1	1	+	17660439	17660837	0,255,127
chrUextra	17660439	17660862	1	1	+	17660439	17660862	0,255,127
chrUextra	17660439	17660982	1	2	+	17660439	17660982	0,255,127
chrUextra	17660439	17661024	1	1	+	17660439	17661024	0,255,127
chrUextra	17660439	17664918	1	1	+	17660439	17664918	0,255,127
chrUextra	17660439	17767802	1	2	+	17660439	17767802	0,255,127
chrUextra	17660439	17774816	1	1	+	17660439	17774816	0,255,127
chrUextra	17660439	17835198	1	1	+	17660439	17835198	0,255,127
chrUextra	17660439	18018309	1	1	+	17660439	18018309	0,255,127
chrUextra	17660440	17660856	1	1	+	17660440	17660856	0,255,127
chrUextra	17660440	17660879	1	1	+	17660440	17660879	0,205,102
chrUextra	17660440	17673026	1	3	+	17660440	17673026	0,205,102
chrUextra	17660440	17697588	1	1	+	17660440	17697588	0,255,127
chrUextra	17660440	17736898	1	15	+	17660440	17736898	0,205,102
chrUextra	17660440	17799809	1	4	+	17660440	17799809	0,205,102
chrUextra	17660440	17872126	1	1	+	17660440	17872126	0,255,127
chrUextra	17660440	18002030	1	1	+	17660440	18002030	0,255,127
chrUextra	17660442	17660573	1	1	+	17660442	17660573	0,205,102
chrUextra	17660442	17660719	1	1	+	17660442	17660719	0,255,127
chrUextra	17660442	17660729	1	1	+	17660442	17660729	0,255,127
chrUextra	17660442	17660730	1	1	+	17660442	17660730	0,255,127
chrUextra	17660442	17660837	1	1	+	17660442	17660837	0,205,102
chrUextra	17660442	17660844	1	1	+	17660442	17660844	0,255,127
chrUextra	17660442	17660846	1	1	+	17660442	17660846	0,255,127
chrUextra	17660442	17660913	1	1	+	17660442	17660913	0,205,102
chrUextra	17660442	17660915	2	11	+	17660442	17660915	0,205,102
chrUextra	17660442	18024707	1	1	+	17660442	18024707	0,205,102
chrUextra	17660446	17660754	1	6	+	17660446	17660754	0,205,102
chrUextra	17660446	17660848	1	1	+	17660446	17660848	0,255,127
chrUextra	17660446	17660860	1	17	+	17660446	17660860	0,255,127
chrUextra	17660446	17660868	1	1	+	17660446	17660868	0,255,127
chrUextra	17660446	17660870	1	1	+	17660446	17660870	0,205,102
chrUextra	17660446	17660890	1	1	+	17660446	17660890	0,255,127
chrUextra	17660446	17661031	1	2	+	17660446	17661031	0,255,127
chrUextra	17660446	17664976	1	1	+	17660446	17664976	0,255,127
chrUextra	17660446	17665015	1	3	+	17660446	17665015	0,255,127
chrUextra	17660446	18024376	1	1	+	17660446	18024376	0,205,102
chrUextra	17660448	17660719	1	149	+	17660448	17660719	0,255,127
chrUextra	17660448	17660730	1	1	+	17660448	17660730	0,255,127
chrUextra	17660448	17660760	1	3	+	17660448	17660760	0,255,127
chrUextra	17660448	17660837	1	1	+	17660448	17660837	0,205,102
chrUextra	17660448	17660846	1	2	+	17660448	17660846	0,255,127
chrUextra	17660448	17660854	1	1	+	17660448	17660854	0,205,102
chrUextra	17660448	17660882	1	1	+	17660448	17660882	0,255,127
chrUextra	17660448	17660900	1	1	+	17660448	17660900	0,255,127
chrUextra	17660448	17660975	1	1	+	17660448	17660975	0,255,127
chrUextra	17660448	17660995	1	2	+	17660448	17660995	0,255,127
chrUextra	17660448	17661030	1	1	+	17660448	17661030	0,255,127
chrUextra	17660448	17664898	1	1	+	17660448	17664898	0,255,127
chrUextra	17660450	17660719	1	9	+	17660450	17660719	0,255,127
chrUextra	17660450	17660730	1	17	+	17660450	17660730	0,255,127
chrUextra	17660450	17660846	1	1	+	17660450	17660846	0,255,127
chrUextra	17660450	17660854	1	1	+	17660450	17660854	0,205,102
chrUextra	17660450	17664908	1	7	+	17660450	17664908	0,205,102
chrUextra	17660450	17664957	1	1	+	17660450	17664957	0,255,127
chrUextra	17660450	17664958	1	1	+	17660450	17664958	0,205,102
chrUextra	17660450	17665019	1	4	+	17660450	17665019	0,255,127
chrUextra	17660450	17696408	1	1	+	17660450	17696408	0,205,102
chrUextra	17660452	17660733	1	1	+	17660452	17660733	0,255,127
chrUextra	17660452	17660738	1	3	+	17660452	17660738	0,255,127
chrUextra	17660452	17660760	1	2	+	17660452	17660760	0,255,127
chrUextra	17660452	17660856	1	1	+	17660452	17660856	0,255,127
chrUextra	17660452	17660964	1	1	+	17660452	17660964	0,255,127
chrUextra	17660452	17660975	1	1	+	17660452	17660975	0,255,127
chrUextra	17660452	17865139	1	1	+	17660452	17865139	0,255,127
chrUextra	17660452	18024360	1	1	+	17660452	18024360	0,255,127
chrUextra	17660460	17661040	1	1	+	17660460	17661040	0,255,127
chrUextra	17660460	17664941	1	1	+	17660460	17664941	0,255,127
chrUextra	17660463	17660705	1	1	+	17660463	17660705	0,255,127
chrUextra	17660463	17661014	2	2	+	17660463	17661014	0,255,127
chrUextra	17660467	17660907	1	1	+	17660467	17660907	0,255,127
chrUextra	17660467	17664908	2	2	+	17660467	17664908	0,255,127
chrUextra	17660467	17664937	1	5	+	17660467	17664937	0,255,127
chrUextra	17660467	17664950	1	19	+	17660467	17664950	0,255,127
chrUextra	17660467	17664952	1	1	+	17660467	17664952	0,255,127
chrUextra	17660467	17664997	1	4	+	17660467	17664997	0,255,127
chrUextra	17660467	17665001	1	1	+	17660467	17665001	0,255,127
chrUextra	17660469	17664920	1	1	+	17660469	17664920	0,255,127
chrUextra	17660469	17665001	1	1	+	17660469	17665001	0,255,127
chrUextra	17660469	17717479	1	1	+	17660469	17717479	0,255,127
chrUextra	17660472	17660738	1	1	+	17660472	17660738	0,255,127
chrUextra	17660472	17660742	1	1	+	17660472	17660742	0,255,127
chrUextra	17660472	17660996	1	1	+	17660472	17660996	0,255,127
chrUextra	17660472	17661009	1	29	+	17660472	17661009	0,255,127
chrUextra	17660472	17664733	1	1	+	17660472	17664733	0,255,127
chrUextra	17660472	17664845	1	2	+	17660472	17664845	0,255,127
chrUextra	17660472	17664850	1	4	+	17660472	17664850	0,255,127
chrUextra	17660472	17664917	1	73	+	17660472	17664917	0,255,127
chrUextra	17660472	17664918	1	1	+	17660472	17664918	0,205,102
chrUextra	17660472	17664939	1	18	+	17660472	17664939	0,255,127
chrUextra	17660472	17664955	1	9	+	17660472	17664955	0,255,127
chrUextra	17660472	17664963	1	6	+	17660472	17664963	0,255,127
chrUextra	17660472	17665006	1	18	+	17660472	17665006	0,255,127
chrUextra	17660472	17696417	1	2	+	17660472	17696417	0,255,127
chrUextra	17660472	17738238	1	2	+	17660472	17738238	0,255,127
chrUextra	17660474	17660829	1	1	+	17660474	17660829	0,255,127
chrUextra	17660474	17664920	1	1	+	17660474	17664920	0,255,127
chrUextra	17660476	17660982	1	1	+	17660476	17660982	0,255,127
chrUextra	17660476	17660995	1	1	+	17660476	17660995	0,255,127
chrUextra	17660476	17840791	1	1	+	17660476	17840791	0,255,127
chrUextra	17660476	17954637	1	1	+	17660476	17954637	0,255,127
chrUextra	17660477	17661031	2	2	+	17660477	17661031	0,255,127
chrUextra	17660478	17660846	2	2	+	17660478	17660846	0,255,127
chrUextra	17660478	17660854	1	1	+	17660478	17660854	0,255,127
chrUextra	17660478	17660966	1	1	+	17660478	17660966	0,255,127
chrUextra	17660478	17660973	2	2	+	17660478	17660973	0,255,127
chrUextra	17660478	17664854	1	1	+	17660478	17664854	0,255,127
chrUextra	17660478	17664935	1	1	+	17660478	17664935	0,255,127
chrUextra	17660478	17664993	1	1	+	17660478	17664993	0,255,127
chrUextra	17660479	17660816	1	1	+	17660479	17660816	0,255,127
chrUextra	17660482	17660765	1	1	+	17660482	17660765	0,255,127
chrUextra	17660482	17661018	1	3	+	17660482	17661018	0,255,127
chrUextra	17660482	17664918	1	19	+	17660482	17664918	0,255,127
chrUextra	17660482	17664997	2	2	+	17660482	17664997	0,255,127
chrUextra	17660482	17665008	1	146	+	17660482	17665008	0,255,127
chrUextra	17660482	17696418	1	2	+	17660482	17696418	0,255,127
chrUextra	17660482	17843465	1	1	+	17660482	17843465	0,255,127
chrUextra	17660485	17660754	1	1	+	17660485	17660754	0,205,102
chrUextra	17660485	17661031	1	2	+	17660485	17661031	0,255,127
chrUextra	17660485	17664920	1	25	+	17660485	17664920	0,255,127
chrUextra	17660485	17664976	1	1	+	17660485	17664976	0,255,127
chrUextra	17660485	17665015	1	1	+	17660485	17665015	0,255,127
chrUextra	17660485	17738156	1	1	+	17660485	17738156	0,205,102
chrUextra	17660485	17909301	1	1	+	17660485	17909301	0,255,127
chrUextra	17660486	17660719	1	2	+	17660486	17660719	0,255,127
chrUextra	17660486	17664971	1	3	+	17660486	17664971	0,255,127
chrUextra	17660487	17660719	1	22	+	17660487	17660719	0,255,127
chrUextra	17660487	17660872	1	1	+	17660487	17660872	0,255,127
chrUextra	17660487	17717289	1	1	+	17660487	17717289	0,255,127
chrUextra	17660488	17660719	1	104	+	17660488	17660719	0,255,127
chrUextra	17660488	17660782	1	1	+	17660488	17660782	0,255,127
chrUextra	17660488	17660944	1	1	+	17660488	17660944	0,255,127
chrUextra	17660488	17664971	1	13	+	17660488	17664971	0,255,127
chrUextra	17660490	17660828	1	1	+	17660490	17660828	0,255,127
chrUextra	17660490	17660982	1	1	+	17660490	17660982	0,255,127
chrUextra	17660490	17661037	1	15	+	17660490	17661037	0,255,127
chrUextra	17660491	17664889	1	1	+	17660491	17664889	0,255,127
chrUextra	17660491	17664976	1	3	+	17660491	17664976	0,255,127
chrUextra	17660493	17660719	1	2	+	17660493	17660719	0,255,127
chrUextra	17660493	17660856	1	1	+	17660493	17660856	0,255,127
chrUextra	17660493	17660890	1	1	+	17660493	17660890	0,255,127
chrUextra	17660493	17661023	1	32	+	17660493	17661023	0,255,127
chrUextra	17660493	17664976	1	11	+	17660493	17664976	0,255,127
chrUextra	17660493	17665023	1	1	+	17660493	17665023	0,255,127
chrUextra	17660495	17660719	1	36	+	17660495	17660719	0,255,127
chrUextra	17660495	17660856	1	1	+	17660495	17660856	0,255,127
chrUextra	17660495	17660915	2	2	+	17660495	17660915	0,255,127
chrUextra	17660495	17717289	1	4	+	17660495	17717289	0,255,127
chrUextra	17660497	17660719	1	2	+	17660497	17660719	0,255,127
chrUextra	17660497	17660730	1	3	+	17660497	17660730	0,255,127
chrUextra	17660497	17660738	1	5	+	17660497	17660738	0,255,127
chrUextra	17660497	17660742	1	1	+	17660497	17660742	0,255,127
chrUextra	17660497	17660995	1	37	+	17660497	17660995	0,255,127
chrUextra	17660497	17664908	1	2	+	17660497	17664908	0,205,102
chrUextra	17660497	17664965	1	1	+	17660497	17664965	0,255,127
chrUextra	17660497	17667939	1	1	+	17660497	17667939	0,255,127
chrUextra	17660628	17660743	1	1	+	17660628	17660743	0,255,127
chrUextra	17660628	17660794	1	1	+	17660628	17660794	0,255,127
chrUextra	17660628	17660834	1	4	+	17660628	17660834	0,255,127
chrUextra	17660628	17660856	1	1	+	17660628	17660856	0,255,127
chrUextra	17660628	17660913	1	1	+	17660628	17660913	0,255,127
chrUextra	17660628	17660995	1	1	+	17660628	17660995	0,255,127
chrUextra	17660628	17660996	1	1	+	17660628	17660996	0,255,127
chrUextra	17660628	17661009	1	2	+	17660628	17661009	0,255,127
chrUextra	17660628	17664778	1	3	+	17660628	17664778	0,255,127
chrUextra	17660628	17664779	1	4	+	17660628	17664779	0,255,127
chrUextra	17660628	17664780	1	2	+	17660628	17664780	0,255,127
chrUextra	17660628	17664808	1	14	+	17660628	17664808	0,255,127
chrUextra	17660628	17664810	1	14	+	17660628	17664810	0,255,127
chrUextra	17660628	17664818	1	1	+	17660628	17664818	0,255,127
chrUextra	17660628	17664820	1	49	+	17660628	17664820	0,255,127
chrUextra	17660628	17664826	1	3	+	17660628	17664826	0,255,127
chrUextra	17660628	17664827	1	1	+	17660628	17664827	0,255,127
chrUextra	17660628	17664838	1	1	+	17660628	17664838	0,255,127
chrUextra	17660628	17664845	1	28	+	17660628	17664845	0,255,127
chrUextra	17660628	17664846	1	2	+	17660628	17664846	0,255,127
chrUextra	17660628	17664850	1	52	+	17660628	17664850	0,255,127
chrUextra	17660628	17664854	1	2	+	17660628	17664854	0,255,127
chrUextra	17660628	17664862	2	2	+	17660628	17664862	0,255,127
chrUextra	17660628	17664876	12	1281	+	17660628	17664876	0,255,127
chrUextra	17660628	17664887	1	1	+	17660628	17664887	0,255,127
chrUextra	17660628	17664889	1	2	+	17660628	17664889	0,255,127
chrUextra	17660628	17664900	1	45	+	17660628	17664900	0,255,127
chrUextra	17660628	17664903	1	66	+	17660628	17664903	0,255,127
chrUextra	17660628	17664904	1	1	+	17660628	17664904	0,255,127
chrUextra	17660628	17664908	1	6	+	17660628	17664908	0,255,127
chrUextra	17660628	17664917	1	46	+	17660628	17664917	0,255,127
chrUextra	17660628	17664918	1	1	+	17660628	17664918	0,255,127
chrUextra	17660628	17664928	3	3	+	17660628	17664928	0,255,127
chrUextra	17660628	17664944	1	1	+	17660628	17664944	0,255,127
chrUextra	17660628	17664950	1	1	+	17660628	17664950	0,255,127
chrUextra	17660628	17664955	1	3	+	17660628	17664955	0,255,127
chrUextra	17660628	17664956	1	1	+	17660628	17664956	0,255,127
chrUextra	17660628	17664957	1	2	+	17660628	17664957	0,255,127
chrUextra	17660628	17664965	1	1	+	17660628	17664965	0,255,127
chrUextra	17660628	17664991	1	3	+	17660628	17664991	0,255,127
chrUextra	17660628	17665036	1	1	+	17660628	17665036	0,255,127
chrUextra	17660628	17705635	1	1	+	17660628	17705635	0,255,127
chrUextra	17660628	17705996	1	1	+	17660628	17705996	0,255,127
chrUextra	17660628	17738154	1	6	+	17660628	17738154	0,255,127
chrUextra	17660628	17738168	1	1	+	17660628	17738168	0,255,127
chrUextra	17660628	17738192	1	1	+	17660628	17738192	0,255,127
chrUextra	17660628	17738194	1	1	+	17660628	17738194	0,255,127
chrUextra	17660628	17738263	1	51	+	17660628	17738263	0,255,127
chrUextra	17660628	17738286	1	4	+	17660628	17738286	0,255,127
chrUextra	17660628	17738299	1	1	+	17660628	17738299	0,255,127
chrUextra	17660628	17738301	1	3	+	17660628	17738301	0,255,127
chrUextra	17660628	17738313	1	2	+	17660628	17738313	0,255,127
chrUextra	17660628	17747626	1	1	+	17660628	17747626	0,255,127
chrUextra	17660628	17747728	1	1	+	17660628	17747728	0,255,127
chrUextra	17660628	17748200	1	3	+	17660628	17748200	0,255,127
chrUextra	17660628	17751012	1	3	+	17660628	17751012	0,255,127
chrUextra	17660628	17751189	1	2	+	17660628	17751189	0,255,127
chrUextra	17660628	17800291	1	1	+	17660628	17800291	0,255,127
chrUextra	17660628	17800392	1	1	+	17660628	17800392	0,255,127
chrUextra	17660628	17800594	1	1	+	17660628	17800594	0,255,127
chrUextra	17660628	17807779	1	1	+	17660628	17807779	0,255,127
chrUextra	17660628	17831751	1	1	+	17660628	17831751	0,255,127
chrUextra	17660628	17841130	1	3	+	17660628	17841130	0,255,127
chrUextra	17660628	17841294	1	3	+	17660628	17841294	0,255,127
chrUextra	17660628	17843193	1	1	+	17660628	17843193	0,255,127
chrUextra	17660628	17843367	1	3	+	17660628	17843367	0,255,127
chrUextra	17660628	17843397	1	1	+	17660628	17843397	0,255,127
chrUextra	17660628	17850653	2	2	+	17660628	17850653	0,255,127
chrUextra	17660628	17875831	1	16	+	17660628	17875831	0,255,127
chrUextra	17660628	17878463	1	6	+	17660628	17878463	0,255,127
chrUextra	17660628	17878480	1	1	+	17660628	17878480	0,255,127
chrUextra	17660628	17878504	1	1	+	17660628	17878504	0,255,127
chrUextra	17660628	17974642	1	1	+	17660628	17974642	0,255,127
chrUextra	17660628	17984884	2	2	+	17660628	17984884	0,255,127
chrUextra	17660628	18024374	1	50	+	17660628	18024374	0,255,127
chrUextra	17660628	18045020	1	1	+	17660628	18045020	0,255,127
chrUextra	17660628	18045031	1	1	+	17660628	18045031	0,255,127
chrUextra	17660628	18045033	1	1	+	17660628	18045033	0,255,127
chrUextra	17660628	18045041	1	1	+	17660628	18045041	0,255,127
chrUextra	17660628	18045048	1	1	+	17660628	18045048	0,255,127
chrUextra	17660630	17660795	1	13	+	17660630	17660795	0,255,127
chrUextra	17660630	17660819	1	1	+	17660630	17660819	0,255,127
chrUextra	17660630	17660846	1	1	+	17660630	17660846	0,255,127
chrUextra	17660630	17660986	1	4	+	17660630	17660986	0,255,127
chrUextra	17660630	17664716	1	1	+	17660630	17664716	0,255,127
chrUextra	17660630	17664757	1	1	+	17660630	17664757	0,255,127
chrUextra	17660630	17664809	1	5	+	17660630	17664809	0,255,127
chrUextra	17660630	17664811	1	8	+	17660630	17664811	0,255,127
chrUextra	17660630	17664841	2	2	+	17660630	17664841	0,255,127
chrUextra	17660630	17664846	1	1	+	17660630	17664846	0,255,127
chrUextra	17660630	17664878	1	6	+	17660630	17664878	0,255,127
chrUextra	17660630	17664901	1	2	+	17660630	17664901	0,255,127
chrUextra	17660630	17664965	1	2	+	17660630	17664965	0,255,127
chrUextra	17660630	17665023	1	1	+	17660630	17665023	0,255,127
chrUextra	17660630	17705891	2	2	+	17660630	17705891	0,255,127
chrUextra	17660630	17734976	1	1	+	17660630	17734976	0,255,127
chrUextra	17660630	17738194	2	2	+	17660630	17738194	0,205,102
chrUextra	17660630	17738263	1	13	+	17660630	17738263	0,255,127
chrUextra	17660630	17738275	1	7	+	17660630	17738275	0,255,127
chrUextra	17660630	17800387	1	1	+	17660630	17800387	0,255,127
chrUextra	17660630	17843194	1	2	+	17660630	17843194	0,255,127
chrUextra	17660630	17875831	1	7	+	17660630	17875831	0,255,127
chrUextra	17660630	17875832	1	10	+	17660630	17875832	0,255,127
chrUextra	17660630	17875846	1	2	+	17660630	17875846	0,255,127
chrUextra	17660630	17954617	1	1	+	17660630	17954617	0,255,127
chrUextra	17660630	17954986	1	1	+	17660630	17954986	0,255,127
chrUextra	17660630	17975028	1	1	+	17660630	17975028	0,255,127
chrUextra	17660632	17664878	2	2	+	17660632	17664878	0,255,127
chrUextra	17660632	17729769	1	1	+	17660632	17729769	0,255,127
chrUextra	17660632	17738263	2	2	+	17660632	17738263	0,255,127
chrUextra	17660632	17738268	1	2	+	17660632	17738268	0,255,127
chrUextra	17660632	17738289	1	2	+	17660632	17738289	0,255,127
chrUextra	17660632	17875831	1	3	+	17660632	17875831	0,255,127
chrUextra	17660632	17875840	1	4	+	17660632	17875840	0,255,127
chrUextra	17660632	17875846	1	2	+	17660632	17875846	0,255,127
chrUextra	17660632	17878504	1	1	+	17660632	17878504	0,255,127
chrUextra	17660633	17660986	1	1	+	17660633	17660986	0,255,127
chrUextra	17660634	17717289	1	1	+	17660634	17717289	0,255,127
chrUextra	17660634	17840784	1	1	+	17660634	17840784	0,255,127
chrUextra	17660634	17984793	1	1	+	17660634	17984793	0,255,127
chrUextra	17660636	17875825	1	1	+	17660636	17875825	0,255,127
chrUextra	17660638	17664690	1	1	+	17660638	17664690	0,255,127
chrUextra	17660638	17664792	1	6	+	17660638	17664792	0,255,127
chrUextra	17660638	17747770	1	1	+	17660638	17747770	0,255,127
chrUextra	17660638	17800403	1	1	+	17660638	17800403	0,255,127
chrUextra	17660638	17875819	1	1	+	17660638	17875819	0,255,127
chrUextra	17660638	17875831	2	2	+	17660638	17875831	0,255,127
chrUextra	17660638	17875846	1	24	+	17660638	17875846	0,255,127
chrUextra	17660638	17984899	1	1	+	17660638	17984899	0,255,127
chrUextra	17660642	17738206	1	1	+	17660642	17738206	0,255,127
chrUextra	17660642	17875850	1	1	+	17660642	17875850	0,205,102
chrUextra	17660654	17664887	1	2	+	17660654	17664887	0,205,102
chrUextra	17660654	17738282	1	1	+	17660654	17738282	0,205,102
chrUextra	17660654	17747699	1	1	+	17660654	17747699	0,205,102
chrUextra	17660654	17848093	1	1	+	17660654	17848093	0,255,127
chrUextra	17660654	18072222	1	2	+	17660654	18072222	0,205,102
chrUextra	17660656	17717289	1	32	+	17660656	17717289	0,255,127
chrUextra	17660656	17875861	1	4	+	17660656	17875861	0,255,127
chrUextra	17660656	17984914	1	1	+	17660656	17984914	0,255,127
chrUextra	17660660	17661158	1	1	+	17660660	17661158	0,205,102
chrUextra	17660660	17665030	1	12	+	17660660	17665030	0,255,127
chrUextra	17660660	17717292	2	2	+	17660660	17717292	0,255,127
chrUextra	17660660	17738217	1	1	+	17660660	17738217	0,255,127
chrUextra	17660660	17738219	1	1	+	17660660	17738219	0,255,127
chrUextra	17660660	18024382	1	49	+	17660660	18024382	0,255,127
chrUextra	17660660	18045026	1	1	+	17660660	18045026	0,255,127
chrUextra	17660661	17747747	1	1	+	17660661	17747747	0,255,127
chrUextra	17660662	17664803	1	1	+	17660662	17664803	0,255,127
chrUextra	17660662	17717289	1	3	+	17660662	17717289	0,255,127
chrUextra	17660662	17984820	1	2	+	17660662	17984820	0,255,127
chrUextra	17660693	17664955	1	1	+	17660693	17664955	0,255,127
chrUextra	17660702	17717289	1	1	+	17660702	17717289	0,255,127
chrUextra	17660722	17664946	1	1	+	17660722	17664946	0,255,127
chrUextra	17660727	17662326	1	1	+	17660727	17662326	0,255,127
chrUextra	17660737	17660857	1	1	+	17660737	17660857	0,255,127
chrUextra	17660737	17664862	1	1	+	17660737	17664862	0,205,102
chrUextra	17660737	17705635	1	1	+	17660737	17705635	0,205,102
chrUextra	17660737	17840823	1	4	+	17660737	17840823	0,205,102
chrUextra	17660739	17738196	1	1	+	17660739	17738196	0,255,127
chrUextra	17660741	17717289	1	1	+	17660741	17717289	0,255,127
chrUextra	17660744	17664870	1	1	+	17660744	17664870	0,255,127
chrUextra	17660754	17664908	1	1	+	17660754	17664908	0,255,127
chrUextra	17660756	17660915	1	2	+	17660756	17660915	0,205,102
chrUextra	17660756	17717416	2	2	+	17660756	17717416	0,255,127
chrUextra	17660763	17660982	2	2	+	17660763	17660982	0,255,127
chrUextra	17660766	17769186	1	1	+	17660766	17769186	0,255,127
chrUextra	17660767	17660935	1	1	+	17660767	17660935	0,255,127
chrUextra	17660774	17717375	1	1	+	17660774	17717375	0,255,127
chrUextra	17660778	17954583	1	1	+	17660778	17954583	0,255,127
chrUextra	17660780	17717363	1	1	+	17660780	17717363	0,255,127
chrUextra	17660786	17660995	1	3	+	17660786	17660995	0,255,127
chrUextra	17660786	17717389	1	1	+	17660786	17717389	0,255,127
chrUextra	17660815	17747856	1	1	+	17660815	17747856	0,205,102
chrUextra	17660838	17840835	1	1	+	17660838	17840835	0,255,127
chrUextra	17660846	17717289	1	1	+	17660846	17717289	0,255,127
chrUextra	17660878	17665001	1	1	+	17660878	17665001	0,205,102
chrUextra	17660878	17665010	1	1	+	17660878	17665010	0,255,127
chrUextra	17660889	17696420	1	1	+	17660889	17696420	0,255,127
chrUextra	17660914	17664995	1	1	+	17660914	17664995	0,255,127
chrUextra	17660927	17696420	1	1	+	17660927	17696420	0,255,127
chrUextra	17660932	17664889	1	2	+	17660932	17664889	0,255,127
chrUextra	17660932	17738291	1	1	+	17660932	17738291	0,255,127
chrUextra	17660932	18072475	1	1	+	17660932	18072475	0,205,102
chrUextra	17660933	17840849	1	1	+	17660933	17840849	0,255,127
chrUextra	17660934	17717289	1	2	+	17660934	17717289	0,255,127
chrUextra	17660936	17664851	1	1	+	17660936	17664851	0,205,102
chrUextra	17660936	17665019	1	1	+	17660936	17665019	0,255,127
chrUextra	17660945	17661510	1	1	+	17660945	17661510	0,255,127
chrUextra	17660949	17840849	1	1	+	17660949	17840849	0,255,127
chrUextra	17660952	17661508	1	1	+	17660952	17661508	0,255,127
chrUextra	17660980	17695011	1	1	+	17660980	17695011	0,205,102
chrUextra	17662223	18024376	1	1	+	17662223	18024376	0,255,127
chrUextra	17662255	17769226	1	1	+	17662255	17769226	0,255,127
chrUextra	1766344	1766870	1	1	+	1766344	1766870	0,255,127
chrUextra	17664169	17664718	1	1	+	17664169	17664718	0,255,127
chrUextra	17664396	17664967	1	1	+	17664396	17664967	0,255,127
chrUextra	17664399	17664878	1	1	+	17664399	17664878	0,255,127
chrUextra	17664408	17664931	1	1	+	17664408	17664931	0,255,127
chrUextra	17664409	17664941	1	1	+	17664409	17664941	0,255,127
chrUextra	17664424	17664878	1	1	+	17664424	17664878	0,255,127
chrUextra	17664433	17664911	1	1	+	17664433	17664911	0,255,127
chrUextra	17664433	17664930	2	2	+	17664433	17664930	0,255,127
chrUextra	17664436	17664908	1	3	+	17664436	17664908	0,255,127
chrUextra	17664439	17665009	1	1	+	17664439	17665009	0,205,102
chrUextra	17664466	17664993	1	1	+	17664466	17664993	0,255,127
chrUextra	17664475	17664874	1	1	+	17664475	17664874	0,255,127
chrUextra	17664475	17664928	1	1	+	17664475	17664928	0,205,102
chrUextra	17664475	17664997	1	3	+	17664475	17664997	0,205,102
chrUextra	17664481	17664889	1	1	+	17664481	17664889	0,255,127
chrUextra	17664610	17738475	1	1	+	17664610	17738475	0,255,127
chrUextra	17664611	17696138	1	15	+	17664611	17696138	0,255,127
chrUextra	17664614	17696146	1	1	+	17664614	17696146	0,255,127
chrUextra	17664625	17696138	1	1	+	17664625	17696138	0,255,127
chrUextra	17664663	17738395	1	2	+	17664663	17738395	0,255,127
chrUextra	17664674	17738417	1	1	+	17664674	17738417	0,255,127
chrUextra	17664674	17783534	1	2	+	17664674	17783534	0,255,127
chrUextra	17664692	17738435	2	2	+	17664692	17738435	0,255,127
chrUextra	17664703	17696021	1	1	+	17664703	17696021	0,255,127
chrUextra	17664703	17738313	1	1	+	17664703	17738313	0,255,127
chrUextra	17664714	17738367	1	1	+	17664714	17738367	0,255,127
chrUextra	17664755	17738246	1	1	+	17664755	17738246	0,255,127
chrUextra	17664759	17738329	1	2	+	17664759	17738329	0,255,127
chrUextra	17664762	17664878	1	1	+	17664762	17664878	0,255,127
chrUextra	17664769	17738268	1	1	+	17664769	17738268	0,255,127
chrUextra	17664771	17738313	1	1	+	17664771	17738313	0,255,127
chrUextra	17664775	18037604	1	1	+	17664775	18037604	0,255,127
chrUextra	17664783	17696314	2	2	+	17664783	17696314	0,255,127
chrUextra	17664787	17664991	1	1	+	17664787	17664991	0,255,127
chrUextra	17664787	17738299	1	3	+	17664787	17738299	0,255,127
chrUextra	17664791	17738329	1	1	+	17664791	17738329	0,255,127
chrUextra	17664793	17805882	2	2	+	17664793	17805882	0,255,127
chrUextra	17664796	17664948	1	1	+	17664796	17664948	0,255,127
chrUextra	17664796	17696350	1	2	+	17664796	17696350	0,255,127
chrUextra	17664796	17738338	1	1	+	17664796	17738338	0,255,127
chrUextra	17664796	17783523	1	1	+	17664796	17783523	0,255,127
chrUextra	17664796	17805893	1	1	+	17664796	17805893	0,255,127
chrUextra	17664808	17679242	1	1	+	17664808	17679242	0,205,102
chrUextra	17664808	17696334	1	27	+	17664808	17696334	0,205,102
chrUextra	17664808	17738206	1	5	+	17664808	17738206	0,255,127
chrUextra	17664808	17738286	1	11	+	17664808	17738286	0,205,102
chrUextra	17664810	17738322	1	5	+	17664810	17738322	0,255,127
chrUextra	17664810	17738355	1	2	+	17664810	17738355	0,255,127
chrUextra	17664810	17783472	1	2	+	17664810	17783472	0,255,127
chrUextra	17664814	17695965	1	1	+	17664814	17695965	0,255,127
chrUextra	17664814	17738395	1	1	+	17664814	17738395	0,255,127
chrUextra	17664818	17664958	1	1	+	17664818	17664958	0,255,127
chrUextra	17664818	17696351	1	10	+	17664818	17696351	0,255,127
chrUextra	17664818	17738194	1	26	+	17664818	17738194	0,255,127
chrUextra	17664818	17738239	1	103	+	17664818	17738239	0,255,127
chrUextra	17664818	18037552	1	1	+	17664818	18037552	0,255,127
chrUextra	17664822	17696658	1	3	+	17664822	17696658	0,255,127
chrUextra	17664822	17783528	1	1	+	17664822	17783528	0,255,127
chrUextra	17664822	17840828	1	2	+	17664822	17840828	0,255,127
chrUextra	17664823	17664976	1	1	+	17664823	17664976	0,255,127
chrUextra	17664823	17738301	1	5	+	17664823	17738301	0,205,102
chrUextra	17664825	17752199	1	1	+	17664825	17752199	0,255,127
chrUextra	17664827	17664963	1	2	+	17664827	17664963	0,255,127
chrUextra	17664827	17695004	1	1	+	17664827	17695004	0,255,127
chrUextra	17664827	17738263	1	1	+	17664827	17738263	0,255,127
chrUextra	17664841	17695965	1	23	+	17664841	17695965	0,255,127
chrUextra	17664841	17696571	1	3	+	17664841	17696571	0,255,127
chrUextra	17664841	17738170	1	1	+	17664841	17738170	0,255,127
chrUextra	17664841	17738179	1	3	+	17664841	17738179	0,255,127
chrUextra	17664841	17738301	1	1	+	17664841	17738301	0,255,127
chrUextra	17664841	18045043	1	5	+	17664841	18045043	0,255,127
chrUextra	17664846	17664993	1	1	+	17664846	17664993	0,255,127
chrUextra	17664846	17664995	1	7	+	17664846	17664995	0,255,127
chrUextra	17664846	17696346	1	1	+	17664846	17696346	0,255,127
chrUextra	17664846	17696376	1	2	+	17664846	17696376	0,255,127
chrUextra	17664846	17738156	1	1	+	17664846	17738156	0,255,127
chrUextra	17664846	17738227	1	1	+	17664846	17738227	0,255,127
chrUextra	17664846	17738229	1	30	+	17664846	17738229	0,255,127
chrUextra	17664846	17738282	1	8	+	17664846	17738282	0,255,127
chrUextra	17664846	17751399	1	1	+	17664846	17751399	0,255,127
chrUextra	17664846	17805769	1	1	+	17664846	17805769	0,255,127
chrUextra	17664846	18037595	1	2	+	17664846	18037595	0,255,127
chrUextra	17664851	17738178	1	16	+	17664851	17738178	0,255,127
chrUextra	17664851	18045042	1	43	+	17664851	18045042	0,255,127
chrUextra	17664852	17738179	1	166	+	17664852	17738179	0,255,127
chrUextra	17664852	18045043	103	1841	+	17664852	18045043	0,255,127
chrUextra	17664859	17696418	1	1	+	17664859	17696418	0,255,127
chrUextra	17664859	18045049	1	1	+	17664859	18045049	0,255,127
chrUextra	17664863	17696396	1	132	+	17664863	17696396	0,255,127
chrUextra	17664863	17805893	1	2	+	17664863	17805893	0,255,127
chrUextra	17664870	17738291	1	36	+	17664870	17738291	0,255,127
chrUextra	17664871	17696134	2	2	+	17664871	17696134	0,255,127
chrUextra	17664871	17696138	1	4	+	17664871	17696138	0,255,127
chrUextra	17664871	17696376	1	2	+	17664871	17696376	0,255,127
chrUextra	17664871	17696435	1	2	+	17664871	17696435	0,255,127
chrUextra	17664871	17738313	1	2	+	17664871	17738313	0,255,127
chrUextra	17664871	18045018	1	1	+	17664871	18045018	0,255,127
chrUextra	17664874	17665007	1	6	+	17664874	17665007	0,255,127
chrUextra	17664874	17696387	1	1	+	17664874	17696387	0,255,127
chrUextra	17664874	17696428	1	1	+	17664874	17696428	0,255,127
chrUextra	17664874	17738299	1	1	+	17664874	17738299	0,255,127
chrUextra	17664876	17696230	1	7	+	17664876	17696230	0,255,127
chrUextra	17664876	17696341	1	1	+	17664876	17696341	0,255,127
chrUextra	17664876	17696401	1	6	+	17664876	17696401	0,255,127
chrUextra	17664876	17696420	1	1	+	17664876	17696420	0,255,127
chrUextra	17664876	17738156	1	1	+	17664876	17738156	0,205,102
chrUextra	17664876	17814013	1	1	+	17664876	17814013	0,205,102
chrUextra	17664880	17695004	1	3	+	17664880	17695004	0,255,127
chrUextra	17664880	17696408	1	57	+	17664880	17696408	0,205,102
chrUextra	17664880	17738206	1	2	+	17664880	17738206	0,255,127
chrUextra	17664880	17738263	1	61	+	17664880	17738263	0,255,127
chrUextra	17664880	17738295	1	1	+	17664880	17738295	0,255,127
chrUextra	17664880	17805750	1	14	+	17664880	17805750	0,255,127
chrUextra	17664880	17985210	1	1	+	17664880	17985210	0,255,127
chrUextra	17664882	17672414	1	2	+	17664882	17672414	0,255,127
chrUextra	17664882	17738263	1	3	+	17664882	17738263	0,255,127
chrUextra	17664882	17761796	1	1	+	17664882	17761796	0,255,127
chrUextra	17664887	17696408	1	1	+	17664887	17696408	0,205,102
chrUextra	17664890	17696441	1	38	+	17664890	17696441	0,255,127
chrUextra	17664892	17673026	1	1	+	17664892	17673026	0,255,127
chrUextra	17664900	17696420	1	111	+	17664900	17696420	0,255,127
chrUextra	17664902	17696388	1	1	+	17664902	17696388	0,255,127
chrUextra	17664902	17738178	1	19	+	17664902	17738178	0,255,127
chrUextra	17664902	18045042	1	15	+	17664902	18045042	0,255,127
chrUextra	17664903	17738179	1	55	+	17664903	17738179	0,255,127
chrUextra	17664903	17738229	1	1	+	17664903	17738229	0,255,127
chrUextra	17664903	17738301	1	2	+	17664903	17738301	0,255,127
chrUextra	17664903	17805788	1	7	+	17664903	17805788	0,255,127
chrUextra	17664903	17805882	1	1	+	17664903	17805882	0,255,127
chrUextra	17664903	18037614	1	1	+	17664903	18037614	0,255,127
chrUextra	17664903	18045043	1	10	+	17664903	18045043	0,255,127
chrUextra	17664908	17696396	1	1	+	17664908	17696396	0,255,127
chrUextra	17664908	17738168	1	6	+	17664908	17738168	0,255,127
chrUextra	17664908	17738169	2	2	+	17664908	17738169	0,255,127
chrUextra	17664908	18045032	1	4	+	17664908	18045032	0,255,127
chrUextra	17664911	17738287	1	1	+	17664911	17738287	0,255,127
chrUextra	17664913	17696418	2	2	+	17664913	17696418	0,255,127
chrUextra	17664913	17696432	1	6	+	17664913	17696432	0,255,127
chrUextra	17664913	17738249	1	1	+	17664913	17738249	0,255,127
chrUextra	17664913	17738289	2	2	+	17664913	17738289	0,255,127
chrUextra	17664915	17696424	1	1	+	17664915	17696424	0,255,127
chrUextra	17664915	17738291	1	47	+	17664915	17738291	0,255,127
chrUextra	17664915	17805778	1	9	+	17664915	17805778	0,255,127
chrUextra	17664915	17841339	1	1	+	17664915	17841339	0,255,127
chrUextra	17664917	17738334	1	1	+	17664917	17738334	0,255,127
chrUextra	17664919	17738196	2	4	+	17664919	17738196	0,255,127
chrUextra	17664924	17738156	1	4	+	17664924	17738156	0,205,102
chrUextra	17664924	18024376	1	1	+	17664924	18024376	0,205,102
chrUextra	17664925	17717289	1	82	+	17664925	17717289	0,255,127
chrUextra	17664925	18024376	1	1	+	17664925	18024376	0,255,127
chrUextra	17664926	17717289	1	709	+	17664926	17717289	0,255,127
chrUextra	17664927	17676039	1	1	+	17664927	17676039	0,255,127
chrUextra	17664927	17692215	1	2	+	17664927	17692215	0,255,127
chrUextra	17664927	17875881	1	1	+	17664927	17875881	0,255,127
chrUextra	17664930	17696314	1	2	+	17664930	17696314	0,255,127
chrUextra	17664930	17696408	1	4	+	17664930	17696408	0,205,102
chrUextra	17664930	17696423	1	11	+	17664930	17696423	0,205,102
chrUextra	17664930	17717292	2	2	+	17664930	17717292	0,255,127
chrUextra	17664930	17738162	1	2	+	17664930	17738162	0,255,127
chrUextra	17664930	17738257	1	2	+	17664930	17738257	0,255,127
chrUextra	17664930	17738268	1	1	+	17664930	17738268	0,255,127
chrUextra	17664930	17843470	1	1	+	17664930	17843470	0,205,102
chrUextra	17664931	17696094	1	1	+	17664931	17696094	0,255,127
chrUextra	17664931	17738207	1	10	+	17664931	17738207	0,255,127
chrUextra	17664931	17738258	1	26	+	17664931	17738258	0,255,127
chrUextra	17664931	17805745	1	9	+	17664931	17805745	0,255,127
chrUextra	17664932	17769446	1	1	+	17664932	17769446	0,255,127
chrUextra	17664939	17738268	1	2	+	17664939	17738268	0,255,127
chrUextra	17664940	17738170	1	1	+	17664940	17738170	0,255,127
chrUextra	17664941	17738201	1	5	+	17664941	17738201	0,255,127
chrUextra	17664942	17665498	1	3	+	17664942	17665498	0,255,127
chrUextra	17664943	17696338	1	1	+	17664943	17696338	0,255,127
chrUextra	17664947	17738179	1	8	+	17664947	17738179	0,255,127
chrUextra	17664947	17805485	1	1	+	17664947	17805485	0,255,127
chrUextra	17664947	17840817	1	1	+	17664947	17840817	0,255,127
chrUextra	17664947	18045043	1	12	+	17664947	18045043	0,255,127
chrUextra	17664953	17696408	1	3	+	17664953	17696408	0,205,102
chrUextra	17664953	17717398	1	1	+	17664953	17717398	0,205,102
chrUextra	17664953	17717407	2	2	+	17664953	17717407	0,205,102
chrUextra	17664953	17737842	1	1	+	17664953	17737842	0,205,102
chrUextra	17664953	17738184	1	1	+	17664953	17738184	0,255,127
chrUextra	17664953	17738185	1	3	+	17664953	17738185	0,205,102
chrUextra	17664953	17738206	1	3	+	17664953	17738206	0,255,127
chrUextra	17664953	17738233	1	2	+	17664953	17738233	0,205,102
chrUextra	17664953	17738320	1	1	+	17664953	17738320	0,205,102
chrUextra	17664953	17751324	1	1	+	17664953	17751324	0,255,127
chrUextra	17664953	17805807	1	1	+	17664953	17805807	0,205,102
chrUextra	17664953	17939262	1	1	+	17664953	17939262	0,205,102
chrUextra	17664953	17984566	1	1	+	17664953	17984566	0,205,102
chrUextra	17664953	18037497	1	1	+	17664953	18037497	0,255,127
chrUextra	17664953	18045049	1	1	+	17664953	18045049	0,205,102
chrUextra	17664955	17670063	1	1	+	17664955	17670063	0,255,127
chrUextra	17664955	17738233	2	2	+	17664955	17738233	0,205,102
chrUextra	17664955	17738238	1	1	+	17664955	17738238	0,255,127
chrUextra	17664955	17827535	1	1	+	17664955	17827535	0,205,102
chrUextra	17664955	17840849	1	2	+	17664955	17840849	0,255,127
chrUextra	17664969	17738179	1	1	+	17664969	17738179	0,255,127
chrUextra	17664985	17717289	1	1	+	17664985	17717289	0,255,127
chrUextra	17665014	17738116	1	1	+	17665014	17738116	0,255,127
chrUextra	17665068	17738179	1	1	+	17665068	17738179	0,255,127
chrUextra	17665068	17843642	1	1	+	17665068	17843642	0,255,127
chrUextra	17665122	17738041	1	1	+	17665122	17738041	0,255,127
[truncated: 162,857 more rows]
