# Supplementary material for: Deep sequencing the circadian and diurnal transcriptome ofDrosophilabrain
Source: HighWire-hosted journal article supplement (doi:10.1101/gr.128876.111), 2012-04-03
Supplement: Table_S13.xlsx [file Table_S13.xlsx]

## Sheet: Sheet1
Annotation	Enrichment Score	Count	p-value	Benjamini
neuron differentiation	13.23	143	6.1e-22	1.6e-18
plasma membrane	12.56	151	4.3e-24	1e-21
Immunoglobulin-like	10.85	68	3.4e-19	6.2e-16
metamorphosis	8.76	113	2.7e-13	4.7e-11
Protein kinase, ATP binding	8.66	78	5.4e-16	5.1e-13
regulation of RNA splicing	8.41	32	3.1e-09	2.1e-07
Pleckstrin homology	8.1	47	1.1e-10	1.5e-08
GTPase regulator activity	7.95	59	1.1e-11	2.8e-09
transmission of nerve impulse	7.42	77	5.6e-15	1.3e-12
regulation of cell size	7.11	35	1.7e-09	1.3e-07
vesicle-mediated transport	7.1	116	5.4e-12	6.2e-10
SH3 domain	6.86	35	2.7e-09	3.1e-07
ion channel complex	6.59	32	5.7e-12	4.5e-10
learning or memory	6.06	34	1.7e-08	9.2e-07
actin cytoskeleton organization	5.76	51	1.7e-08	9.2e-07
cell recognition	5.72	26	2.2e-08	1.1e-06
C2 calcium-dependant targeting	5.42	23	1.7e-07	1.6e-05
locomotory beehavior	5.35	62	2.3e-09	1.7e-07
synapse organization	5.24	22	2.9e-07	1e-05
regulation of small GTPase	5.23	43	3.7e-11	3.8e-09
BTB/POZ-like	5.21	33	4.9e-08	5e-06
ion binding	4.96	374	2.5e-07	1.3e-05
dorsal closure	4.61	36	5.7e-07	1.8e-05
photoreceptor differentiation	4.6	45	2.1e-07	8e-06
detection of light	4.58	26	3.6e-08	1.8e-06
regulation of system process	4.45	19	7e-07	2.1e-05
EGF-like	4.29	25	4.8e-08	9.9e-07
phosphotransferase	4.18	18	1.5e-06	2.3e-05
cell projection	3.72	40	3.1e-06	0.0001
cell-cell jucntion	3.66	25	5.3e-06	0.00016
RRM2-domain	3.62	13	4.7e-05	0.0072
ankyrin repeat	3.62	27	4.6e-05	0.00048
GTPase activation	3.52	13	9.2e-06	0.00011
exocrine system development	3.31	42	4e-05	0.00072
calcium transport	3.27	11	7.7e-06	0.0001
MAPKKK cascade	3.23	20	1.6e-05	0.00032
RNP-1	3.12	46	1e-05	0.0007
circadian behavior	3	18	2.6e-05	0.00049
