# Supplementary material for: Deep sequencing the circadian and diurnal transcriptome ofDrosophilabrain
Source: HighWire-hosted journal article supplement (doi:10.1101/gr.128876.111), 2012-04-03
Supplement: Table_S14.xlsx [file Table_S14.xlsx]

## Sheet: Sheet1
Gene	Location	time p-value	genotype p-value	interaction p-value	time q-value	genotype q-value	interaction q-value
CG17684	chr2RHet:609433-609638	0.0784467	3.22997e-09	0.0932521	0.804724	4.62185e-05	1
CG17684	chr2RHet:609433-609632	0.0793866	3.40446e-09	0.0937506	0.804811	4.68484e-05	1
CG17082	chr2R:634888-635432	0.00255484	1.13111e-08	0.00218702	0.674128	4.69242e-05	1
CG9628	chr3L:14615776-14616133	0.00505785	1.55956e-08	0.0214855	0.73296	4.69439e-05	1
CG9512	chrX:14799465-14799642	0.0288701	1.73353e-08	0.0111217	0.792302	4.70065e-05	1
Gprk2	chr3R:27236076-27236123	0.0405493	2.65022e-08	0.674304	0.797912	4.70074e-05	1
CG30492	chr2R:3522559-3522705	0.000116427	2.66765e-08	1.72834e-05	0.317702	4.70196e-05	1
Gprk2	chr3R:27236055-27236123	0.044304	2.98482e-08	0.669437	0.799099	4.7023e-05	1
CG9512	chrX:14799476-14799579	0.0427904	3.07511e-08	0.0208945	0.798645	4.70309e-05	1
CG9628	chr3L:14615912-14616035	0.00432254	3.33837e-08	0.0103289	0.722019	4.70427e-05	1
MRP	chr2L:12724472-12724618	0.000223923	3.82308e-08	5.56266e-06	0.363229	4.70441e-05	1
CG9628	chr3L:14615881-14616007	0.0016109	3.88875e-08	0.0114247	0.615618	4.70508e-05	1
Pkc53E	chr2R:12812116-12812291	0.00994283	4.2439e-08	0.00171032	0.766507	4.70551e-05	1
CG17082	chr2R:633851-635432	0.00204401	4.49692e-08	0.00361403	0.647866	5.07788e-05	1
Pkc53E	chr2R:12812016-12812295	0.0128927	5.60823e-08	0.00236177	0.774908	5.22507e-05	1
CG32581	chrX:15690936-15691404	0.231657	6.14609e-08	0.0472265	0.809615	5.22507e-05	1
CG32581	chrX:15690930-15691404	0.231656	6.14621e-08	0.0472285	0.809615	6.87482e-05	1
C1GalTA	chr2L:8943395-8944167	0.250885	9.06483e-08	0.64031	0.809808	6.94033e-05	1
C1GalTA	chr2L:8943423-8944167	0.251748	9.19264e-08	0.646362	0.809816	0.000129416	1
CG8788	chr2R:5027139-5027237	0.156497	1.96591e-07	0.0310875	0.808407	0.000132863	1
CG9512	chrX:14799533-14799601	0.19864	2.04479e-07	0.130077	0.809197	0.000135289	1
CG30492	chr2R:3522264-3522505	6.95352e-05	2.08919e-07	2.27914e-05	0.270087	0.000312215	1
CG13917	chr3L:1593262-1597545	0.00527261	5.32929e-07	0.0334512	0.735629	0.000485934	1
CG13636	chr3R:20660035-20660103	1.12684e-07	9.24809e-07	1.12684e-07	0.00234222	0.000518977	1
bbc	chr2R:9378245-9378376	0.13427	1.01484e-06	0.226124	0.807792	0.000526543	1
Dscam	chr2R:3243406-3243529	0.0313401	1.03416e-06	0.102223	0.793825	0.000534031	1
CG6656	chr3R:17703189-17703570	0.324487	1.04964e-06	0.394323	0.810337	0.000548782	1
pnt	chr3R:19139164-19139280	0.00164436	1.09198e-06	0.00173685	0.618575	0.000615563	1
CG6656	chr3R:17703189-17703510	0.32715	1.2806e-06	0.362107	0.810351	0.000703744	1
CG13917	chr3L:1592744-1597545	0.0102037	1.56477e-06	0.0807029	0.767436	0.000709626	1
CG32103	chr3L:12406548-12407186	0.687773	1.57996e-06	0.0682149	0.827372	0.000741075	1
Doa	chr3R:24731347-24733059	0.0158162	1.6902e-06	0.108316	0.780237	0.000856237	1
CG8788	chr2R:5027011-5027079	0.14626	2.0809e-06	0.00518269	0.808147	0.000891553	1
NfI	chr4:296917-297090	0.315463	2.21488e-06	0.646922	0.810285	0.0010036	1
CG17646	chr2L:1732506-1732654	0.119096	2.65861e-06	0.00987853	0.807241	0.00102655	1
Arp66B	chr3L:8109118-8109186	3.46712e-07	2.76326e-06	3.46712e-07	0.00359625	0.00113418	1
CG8929	chr2R:16215372-16215639	0.00627976	3.2664e-06	0.0019268	0.745889	0.00114201	1
CG3837	chr3R:10747090-10748090	0.0564236	3.31403e-06	0.995463	0.801865	0.0012018	1
CG1553	chr2R:3693731-3693971	0.0480498	3.62739e-06	0.215642	0.800101	0.00124018	1
C1GalTA	chr2L:8950770-8951200	0.758834	3.84537e-06	0.688834	0.834294	0.00131712	1
CG3036	chr2L:4902974-4903968	0.804087	4.32809e-06	0.790649	0.83921	0.00132614	1
CG3036	chr2L:4902974-4903889	0.804212	4.38572e-06	0.790401	0.839223	0.0013365	1
CG8929	chr2R:16214772-16215639	0.0150364	4.4561e-06	0.00463416	0.779012	0.00133797	1
CG31760	chr2L:12142784-12142849	0.00190695	4.47037e-06	0.00920895	0.638919	0.00134381	1
hppy	chr2R:15066221-15066377	0.070023	4.50641e-06	0.449016	0.803841	0.00134381	1
hppy	chr2R:15066231-15066377	0.0700231	4.50646e-06	0.449015	0.803841	0.00142666	1
Ptp99A	chr3R:25252625-25252812	0.158503	5.12046e-06	0.30361	0.808454	0.00143798	1
C1GalTA	chr2L:8950978-8951212	0.729627	5.20896e-06	0.692052	0.831266	0.00146119	1
pnt	chr3R:19139387-19140050	0.147316	5.40413e-06	0.778548	0.808175	0.00147539	1
hppy	chr2R:15066221-15066303	0.0287413	5.52398e-06	0.282656	0.792217	0.00148004	1
Ten-a	chrX:12182999-12183208	0.00394501	5.56497e-06	0.0343216	0.714994	0.00149038	1
CG11357	chr3L:4549769-4549837	0.00161089	5.64595e-06	0.0113581	0.615617	0.00150053	1
ninaC	chr2L:7383807-7384352	0.230006	5.74248e-06	0.195847	0.809597	0.00154917	1
hppy	chr2R:15066221-15066357	0.043579	6.05068e-06	0.411418	0.798885	0.00158845	1
sdk	chrX:581606-581891	0.0433649	6.31184e-06	0.553627	0.798821	0.00174681	1
hppy	chr2R:15066221-15066242	0.0255618	7.3887e-06	0.123364	0.789851	0.00181506	1
CG17684	chr2RHet:609230-609373	0.152798	7.90477e-06	0.178824	0.808317	0.00183057	1
CG17684	chr2RHet:609150-609373	0.153217	8.02362e-06	0.17938	0.808327	0.00183825	1
CG2893	chrXHet:2019-2249	0.0227126	8.08207e-06	0.365849	0.787488	0.0018894	1
Ptp99A	chr3R:25250154-25250335	0.010103	8.48535e-06	0.0296426	0.767083	0.00190275	1
eEF1delta	chr2L:10233481-10233561	0.479468	8.59683e-06	0.176261	0.81092	0.00193016	1
CYLD	chr2L:10296424-10296565	0.0117875	8.82505e-06	0.241972	0.772233	0.00195692	1
CG42596	chr2RHet:1849637-1849944	0.270575	9.05796e-06	0.170508	0.809978	0.00195922	1
Dscam	chr2R:3247380-3247512	0.00374482	9.082e-06	0.0135153	0.710761	0.00202217	1
bol	chr3L:9122997-9123874	0.957833	9.63453e-06	0.937803	0.860695	0.00208394	1
Tm1	chr3R:11129363-11130415	0.232763	1.02279e-05	0.0313173	0.809627	0.00210483	1
Fhos	chr3L:8783685-8784546	0.150267	1.03648e-05	0.220745	0.808253	0.0022853	1
CG6836	chr3L:18943686-18943814	0.500298	1.22981e-05	0.265893	0.810971	0.0022853	1
CG6836	chr3L:18943734-18943814	0.500297	1.22986e-05	0.265896	0.810971	0.00231959	1
ire-1	chr3R:15680162-15681040	0.10115	1.27133e-05	0.648304	0.806377	0.00234455	1
bol	chr3L:9122997-9123452	0.969175	1.29709e-05	0.960562	0.8621	0.00234455	1
Tm1	chr3R:11129363-11130780	0.290128	1.29831e-05	0.0377785	0.810123	0.00234455	1
Tm1	chr3R:11129363-11130872	0.290287	1.30253e-05	0.0377686	0.810125	0.00235274	1
Tm1	chr3R:11129363-11130668	0.287709	1.31369e-05	0.0389708	0.810106	0.00239264	1
bol	chr3L:9122997-9123725	0.960359	1.35911e-05	0.949488	0.86101	0.00243843	1
sda	chr3R:22741455-22741630	0.0269933	1.41598e-05	0.0944746	0.790983	0.00247495	1
CG8234	chr2R:7565219-7565526	0.166234	1.47434e-05	0.0473101	0.808625	0.00248208	1
CG5515	chr3R:20014555-20014623	0.465175	1.47934e-05	0.465175	0.810882	0.00248208	1
CG5515	chr3R:20014555-20014619	0.46521	1.47949e-05	0.46521	0.810882	0.00250315	1
NfI	chr4:296917-297126	0.718023	1.51468e-05	0.907112	0.830228	0.00254386	1
sda	chr3R:22741430-22741630	0.0266053	1.57412e-05	0.0933969	0.790688	0.00258277	1
CYLD	chr2L:10296213-10296565	0.0598124	1.62916e-05	0.160073	0.80244	0.00258909	1
chrb	chr3L:11480660-11481374	0.0637223	1.63797e-05	0.0347955	0.803029	0.00258909	1
CG31352	chr3R:5525233-5525449	0.526137	1.63846e-05	0.408992	0.811028	0.00260159	1
bol	chr3L:9122997-9123508	0.965326	1.66465e-05	0.952724	0.861626	0.00260777	1
s-cup	chr2R:8387460-8388972	0.180433	1.67075e-05	0.358924	0.808901	0.00261391	1
bol	chr3L:9122997-9123493	0.968004	1.68182e-05	0.956174	0.861956	0.00262	1
CG14995	chr3L:4096904-4096978	0.0344163	1.68884e-05	0.0121335	0.795428	0.00262605	1
chrb	chr3L:11480656-11481254	0.06728	1.70085e-05	0.0294485	0.803506	0.00281437	1
chrb	chr3L:11480605-11481701	0.0683177	1.93249e-05	0.0447535	0.803636	0.00282208	1
CG31760	chr2L:12142784-12142833	0.0165469	1.93998e-05	0.123044	0.781283	0.00287502	1
Ptp99A	chr3R:25242678-25242847	0.121965	2.01172e-05	0.119384	0.807356	0.00288983	1
CG30419	chr2R:20099984-20103108	0.370862	2.0302e-05	0.428655	0.810562	0.00289717	1
CG31660	chr2L:4873596-4873999	0.0773379	2.0396e-05	0.0932506	0.804619	0.00292622	1
CG10089	chr3L:13459920-13459988	0.248292	2.07666e-05	0.221832	0.809784	0.00299651	1
CG42330	chr3L:8241658-8242051	0.0597047	2.18087e-05	0.620846	0.802423	0.00302373	1
CG42533	chr2L:7473657-7473889	0.667417	2.22465e-05	0.406301	0.825316	0.00303716	1
CG18619	chr2L:10264081-10264264	0.623914	2.24372e-05	0.0405095	0.820513	0.00303716	1
CG18619	chr2L:10264101-10264264	0.623915	2.24382e-05	0.0405095	0.820513	0.00324234	1
CG8234	chr2R:7565219-7565519	0.21709	2.56757e-05	0.101132	0.809446	0.00327662	1
sda	chr3R:22742225-22742284	0.226424	2.62871e-05	0.0639638	0.809557	0.00328225	1
CG18815	chr3L:11622681-11623248	0.0124638	2.6408e-05	0.00319979	0.773925	0.00328786	1
ire-1	chr3R:15680076-15681040	0.240409	2.6452e-05	0.640811	0.809707	0.00329901	1
crm	chrX:2631955-2632637	0.123379	2.67488e-05	0.162961	0.80741	0.00332102	1
CG18815	chr3L:11622681-11623126	0.0148632	2.71308e-05	0.00339768	0.778723	0.00332647	1
kek3	chr2L:15581859-15583944	0.000505365	2.72394e-05	0.0533102	0.425684	0.00335338	1
CG18815	chr3L:11622681-11623099	0.0139894	2.76558e-05	0.00347087	0.77716	0.00335869	1
CG6498	chr3L:15559179-15559288	0.0441437	2.78257e-05	0.0313302	0.799052	0.00336926	1
CG42596	chr2RHet:1849773-1849944	0.353102	2.80017e-05	0.210935	0.810483	0.00336926	1
nAcRbeta-96A	chr3R:20339417-20339544	0.619059	2.80288e-05	0.296772	0.819939	0.0034107	1
CG14322	chr3R:13473666-13473817	0.0756529	2.87719e-05	0.824503	0.804453	0.00343594	1
kek3	chr2L:15581859-15583988	0.000541849	2.92808e-05	0.0581365	0.431971	0.00344093	1
CG31352	chr3R:5525248-5525638	0.536046	2.93512e-05	0.483671	0.811049	0.00345578	1
sdk	chrX:580845-581891	0.102093	2.96981e-05	0.694588	0.80643	0.00347531	1
Gap1	chr3L:9833612-9834663	0.819294	3.00557e-05	0.390833	0.840887	0.00349454	1
Dscam	chr2R:3230837-3231127	0.124612	3.05224e-05	0.440298	0.807457	0.00351349	1
CG5375	chr2L:10331080-10331116	0.659369	3.08544e-05	0.361139	0.824471	0.00352285	1
s-cup	chr2R:8387460-8389009	0.178935	3.11182e-05	0.716042	0.808874	0.0035275	1
CG6282	chr3L:8600159-8600522	0.140356	3.12035e-05	0.305941	0.80798	0.00359088	1
kek3	chr2L:15581859-15583579	0.000469304	3.26171e-05	0.0760742	0.418729	0.00359528	1
CG30428	chr2R:21141651-21143955	0.927038	3.26571e-05	0.508622	0.85673	0.00359967	1
CG5375	chr2L:10331080-10331149	0.666755	3.28318e-05	0.367492	0.825247	0.00361273	1
CG30428	chr2R:21141651-21143037	0.905133	3.31382e-05	0.566789	0.85377	0.00361705	1
CG30428	chr2R:21141651-21143036	0.905446	3.31899e-05	0.567087	0.853813	0.00361705	1
CG30428	chr2R:21141651-21143076	0.905105	3.32721e-05	0.565825	0.853766	0.00365372	1
Tm1	chr3R:11127346-11127408	0.0702406	3.39073e-05	0.00594246	0.803866	0.00368552	1
crm	chrX:2631955-2632522	0.124975	3.45208e-05	0.171685	0.80747	0.0037064	1
Pkn	chr2R:5159805-5160177	0.026166	3.49132e-05	0.0573728	0.790344	0.00378981	1
Caki	chr3R:17629051-17629111	0.0582822	3.62508e-05	0.1179	0.802189	0.00387611	1
CG30419	chr2R:20100977-20103108	0.302725	3.77739e-05	0.420166	0.810207	0.00388738	1
C1GalTA	chr2L:8946463-8946636	0.307593	3.79844e-05	0.36242	0.810238	0.00394296	1
CG31122	chr3R:14233613-14233935	0.139998	3.90237e-05	0.0782733	0.807969	0.00400796	1
Dscam	chr2R:3241782-3241905	0.0273394	4.02458e-05	0.224867	0.79124	0.00410214	1
CG11727	chrX:11330808-11330825	0.603889	4.20063e-05	0.117533	0.818091	0.00414781	1
Idgf3	chr2L:16452194-16453184	0.245157	4.28786e-05	0.0293753	0.809754	0.00415283	1
Idgf3	chr2L:16452194-16453218	0.245173	4.29713e-05	0.029837	0.809754	0.00415283	1
Idgf3	chr2L:16452194-16453272	0.245198	4.29797e-05	0.0298403	0.809754	0.0041827	1
TfIIA-L	chr3R:23081934-23082186	0.113273	4.36038e-05	0.185427	0.806991	0.0041827	1
dnc	chrX:3152644-3152911	0.693948	4.36251e-05	0.57664	0.827973	0.00419257	1
CG3837	chr3R:10747090-10749397	0.135271	4.37933e-05	0.986347	0.807824	0.00423161	1
Ac3	chr2L:21641073-21641145	0.350392	4.4554e-05	0.285308	0.81047	0.00428891	1
pnt	chr3R:19137704-19137928	0.931813	4.57533e-05	0.459603	0.85736	0.00431234	1
Eip63E	chr3L:3515661-3515934	0.683736	4.63051e-05	0.0276814	0.826973	0.00434931	1
CG7956	chr3R:17352985-17353123	0.0196825	4.70518e-05	0.605367	0.784912	0.00438115	1
AGO2	chr3L:15552200-15553216	0.0602487	4.77695e-05	0.906078	0.80251	0.00439016	1
dnc	chrX:3152647-3152911	0.698768	4.79503e-05	0.587527	0.828436	0.00441696	1
CG3837	chr3R:10747090-10748805	0.129373	4.85845e-05	0.98407	0.807628	0.00443464	1
CG9935	chr4:657178-657244	0.711966	4.90418e-05	0.337524	0.829674	0.00450815	1
CG15828	chr2L:9641721-9641818	0.950154	5.07058e-05	0.38267	0.859727	0.00456679	1
gfA	chrX:19236315-19236632	0.100137	5.20514e-05	0.0301708	0.80632	0.00460766	1
CG30492	chr2R:3538774-3539292	0.746305	5.31208e-05	0.24677	0.832839	0.00463179	1
CG31352	chr3R:5525248-5525449	0.47671	5.37224e-05	0.43678	0.810913	0.00467137	1
ap	chr2R:1604154-1604554	0.190149	5.47224e-05	0.199742	0.809066	0.00467137	1
trol	chrX:2416257-2416454	0.165737	5.47349e-05	0.376277	0.808614	0.0046831	1
CG3104	chr2L:2855618-2855783	0.885861	5.50027e-05	0.600568	0.851063	0.0046831	1
CG3104	chr2L:2855618-2855780	0.88587	5.50038e-05	0.600548	0.851064	0.0047293	1
Drp1	chr2L:2581281-2581838	0.388963	5.62479e-05	0.224712	0.810636	0.00476325	1
Drp1	chr2L:2581196-2581838	0.398587	5.71155e-05	0.224353	0.810672	0.00480029	1
sdk	chrX:580873-580973	0.109403	5.80843e-05	0.384103	0.80681	0.00480029	1
TfIIA-L	chr3R:23081764-23081859	0.311474	5.80902e-05	0.54538	0.810262	0.00482941	1
CG42390	chr3R:17954969-17955120	0.895183	5.88527e-05	0.894268	0.852384	0.00486165	1
CG3625	chr2L:286307-286655	0.00192991	5.98358e-05	0.0147327	0.640488	0.0048758	1
dpr12	chr2R:1741217-1741291	0.887168	6.02085e-05	0.145061	0.851249	0.0048758	1
Tsp42Ee	chr2R:2905195-2906733	0.0473238	6.0217e-05	0.0242094	0.799919	0.00488634	1
Rgk2	chr2R:14434355-14436474	0.148914	6.04598e-05	0.147899	0.808218	0.00488634	1
Rgk2	chr2R:14434355-14436504	0.148913	6.046e-05	0.147898	0.808218	0.00488634	1
Rgk2	chr2R:14434355-14436475	0.148913	6.04602e-05	0.147898	0.808218	0.00490031	1
sdk	chrX:580873-581042	0.189815	6.0917e-05	0.475818	0.80906	0.0049416	1
CG42390	chr3R:17954845-17955120	0.912824	6.21419e-05	0.887846	0.854823	0.00496527	1
Ca-beta	chr2L:11156400-11160336	0.0647914	6.27605e-05	0.0425397	0.803178	0.00497866	1
Ca-beta	chr2L:11156127-11160336	0.0649546	6.32115e-05	0.0419957	0.8032	0.0050117	1
CG41265	chr2RHet:495100-495242	0.0125873	6.4186e-05	0.0124288	0.774214	0.00507603	1
Ptp99A	chr3R:25256848-25256962	0.222146	6.61803e-05	0.393049	0.809507	0.00508234	1
nmo	chr3L:7972149-7972273	0.000296723	6.64326e-05	0.0123265	0.377608	0.00513811	1
heph	chr3R:27806177-27806317	0.00520946	6.8249e-05	0.044922	0.734865	0.0051442	1
UGP	chr3L:9343967-9344950	0.610879	6.84498e-05	0.602397	0.818953	0.00514724	1
CYLD	chr2L:10296172-10296368	0.165838	6.85012e-05	0.142783	0.808617	0.00515934	1
yrt	chr3R:9255915-9256472	0.27284	6.88677e-05	0.593118	0.809996	0.00518327	1
Tsp42Ee	chr2R:2905195-2905869	0.0458153	6.9703e-05	0.0221528	0.799522	0.00519512	1
CG15828	chr2L:9641681-9641808	0.916389	7.01162e-05	0.39833	0.855306	0.00519512	1
Tsp42Ee	chr2R:2905195-2905873	0.0465441	7.01463e-05	0.0225564	0.799717	0.00521857	1
qkr54B	chr2R:13357685-13357709	0.317985	7.08901e-05	0.309595	0.8103	0.00522438	1
nmo	chr3L:7972120-7972273	0.000332226	7.11204e-05	0.0139295	0.382587	0.00522438	1
nmo	chr3L:7972116-7972273	0.000332242	7.11221e-05	0.0139298	0.382589	0.00522438	1
nmo	chr3L:7972123-7972273	0.000332232	7.11232e-05	0.0139292	0.382587	0.00525968	1
CG4629	chr2L:1087619-1088106	0.0156158	7.21555e-05	0.0017788	0.779933	0.00530373	1
UGP	chr3L:9344580-9344950	0.683889	7.36434e-05	0.529512	0.826988	0.00532232	1
Spt-I	chr2R:9057822-9058249	0.121876	7.42206e-05	0.412346	0.807352	0.00538307	1
Spt-I	chr2R:9057822-9058321	0.125096	7.6192e-05	0.401069	0.807475	0.00538904	1
UGP	chr3L:9344557-9344950	0.674958	7.64436e-05	0.516718	0.826091	0.00543036	1
trol	chrX:2438498-2438795	0.336247	7.78099e-05	0.101224	0.8104	0.00544201	1
CG3036	chr2L:4892115-4892604	0.398053	7.81847e-05	0.469631	0.81067	0.00544491	1
mrt	chr3R:23106707-23107029	0.429679	7.83199e-05	0.177051	0.810778	0.0054478	1
CG4629	chr2L:1087695-1088106	0.0167829	7.84176e-05	0.00195415	0.781602	0.0054879	1
Mef2	chr2R:5803550-5804396	0.771564	7.98463e-05	0.630272	0.83573	0.00549357	1
gish	chr3R:12107811-12108130	0.0733979	8.00056e-05	0.0837584	0.804219	0.00551325	1
Pfk	chr2R:5998364-5999080	0.0271119	8.07089e-05	0.131685	0.791072	0.00552719	1
UGP	chr3L:9344483-9344950	0.631163	8.1212e-05	0.543709	0.821355	0.0055355	1
CG15828	chr2L:9643249-9643307	0.33438	8.15153e-05	0.716539	0.81039	0.00562461	1
CG42542	chr3R:11027988-11028796	0.00509326	8.48085e-05	0.0105896	0.733415	0.00562725	1
Mef2	chr2R:5803555-5804417	0.780113	8.49422e-05	0.628455	0.83667	0.00569193	1
TfIIA-L	chr3R:23081756-23082196	0.194131	8.73575e-05	0.233941	0.809129	0.00569193	1
TfIIA-L	chr3R:23081756-23082198	0.194132	8.73587e-05	0.233938	0.809129	0.00569193	1
E(Pc)	chr2R:7339722-7339806	0.0991362	8.74225e-05	0.343809	0.806261	0.00569955	1
CG17082	chr2R:633311-635432	0.0645516	8.7651e-05	0.210331	0.803145	0.00570208	1
TfIIA-L	chr3R:23081756-23082186	0.190729	8.77747e-05	0.230698	0.809075	0.00575686	1
CG3036	chr2L:4892001-4892604	0.408175	9.00053e-05	0.481488	0.810706	0.00575931	1
GlcAT-P	chr3L:11190339-11190603	0.254836	9.01232e-05	0.262322	0.809845	0.00576908	1
CG7770	chr3L:19916775-19916994	0.0666567	9.04949e-05	0.0660941	0.803426	0.00576908	1
MRP	chr2L:12728578-12728798	0.0439233	9.05106e-05	0.0499944	0.798987	0.00577879	1
ire-1	chr3R:15686608-15687156	0.658156	9.08565e-05	0.256609	0.824342	0.00578363	1
CG7770	chr3L:19916703-19916994	0.0667806	9.11487e-05	0.0636475	0.803442	0.00578846	1
shn	chr2R:7077845-7077901	0.423423	9.13423e-05	0.138755	0.810758	0.00581477	1
Dscam	chr2R:3229609-3229896	0.081535	9.23864e-05	0.599094	0.805003	0.00584302	1
stan	chr2R:6578830-6578898	0.436363	9.35808e-05	0.526846	0.810799	0.00586392	1
CG17646	chr2L:1742143-1742260	0.0704166	9.45182e-05	0.0102272	0.803887	0.00586853	1
Rdl	chr3L:9151041-9151178	0.780623	9.46915e-05	0.773841	0.836725	0.00586853	1
Ca-beta	chr2L:11157297-11160336	0.0583961	9.47338e-05	0.0536491	0.802208	0.00587542	1
CG42533	chr2L:7473771-7473889	0.292018	9.50036e-05	0.452657	0.810136	0.00588912	1
me31B	chr2L:10239939-10240084	0.0191035	9.55878e-05	0.0165926	0.78433	0.00590497	1
CG9935	chr4:656751-657244	0.540713	9.62595e-05	0.223695	0.811058	0.00591172	1
CG1718	chrX:21164369-21164557	0.299848	9.66439e-05	0.426809	0.810189	0.00592514	1
Syb	chr2R:6139685-6139753	0.0377027	9.71797e-05	0.449307	0.796858	0.00602404	1
ire-1	chr3R:15686608-15687013	0.672939	0.00010022	0.264463	0.825885	0.00605183	1
Acf1	chr3R:27625161-27625533	0.518743	0.000101084	0.230112	0.811012	0.00605784	1
CG17689	chr3L:13495738-13496484	0.237466	0.000101272	0.249551	0.809677	0.00607889	1
Acf1	chr3R:27625161-27625547	0.521078	0.000101932	0.230101	0.811017	0.00627031	1
gish	chr3R:12107803-12108130	0.0810768	0.000108125	0.0853818	0.804963	0.00629832	1
ire-1	chr3R:15679627-15681040	0.775541	0.000109061	0.735073	0.836169	0.00632324	1
CG15012	chr3L:4291208-4291618	0.0240082	0.0001099	0.0439304	0.788474	0.00633455	1
vlc	chr2R:1589884-1589952	0.0270845	0.000110283	0.0260708	0.791052	0.00638102	1
lola	chr2R:6409533-6410474	0.304846	0.00011187	0.48125	0.810221	0.00638413	1
CG31619	chr2L:21684182-21684339	0.985697	0.000111977	0.88781	0.864097	0.00638593	1
dpr3	chr2L:2058755-2059983	0.000489035	0.000112039	0.0130888	0.422633	0.0063966	1
gfA	chrX:19236315-19236390	0.0879262	0.000112407	0.052294	0.805517	0.00642846	1
CG17689	chr3L:13495840-13496484	0.252644	0.000113513	0.255576	0.809825	0.00646571	1
lola	chr2R:6387703-6389564	0.73058	0.00011482	0.511262	0.83135	0.00646951	1
Tm1	chr3R:11133312-11134286	0.391002	0.000114954	0.0242693	0.810643	0.00650092	1
Caki	chr3R:17642823-17643172	0.413748	0.000116069	0.700405	0.810726	0.00652995	1
gish	chr3R:12107783-12108130	0.0859469	0.000117109	0.0877736	0.805366	0.00655814	1
CG33234	chr3L:2662328-2662748	0.0181123	0.000118128	0.264652	0.783248	0.00658297	1
SKIP	chr3R:17967896-17967945	0.736034	0.000119033	0.577574	0.831854	0.00658543	1
Rdl	chr3L:9154364-9154446	0.15537	0.000119123	0.153395	0.80838	0.00662922	1
spz	chr3R:22891821-22892175	0.19365	0.000120737	0.147853	0.809121	0.00664483	1
Tm1	chr3R:11133312-11134466	0.392093	0.000121318	0.0246487	0.810648	0.00664489	1
Tm1	chr3R:11133312-11134418	0.392095	0.00012132	0.0246491	0.810648	0.00666459	1
NTPase	chr2L:2881091-2881159	0.55935	0.000122057	0.646899	0.812144	0.00667528	1
CG6498	chr3L:15558999-15559253	0.147007	0.000122459	0.112702	0.808167	0.00671689	1
tomosyn	chrX:12527951-12527990	0.115206	0.000124036	0.790569	0.807076	0.00675523	1
CG30492	chr2R:3520606-3520907	0.557099	0.000125508	0.626929	0.81182	0.00676627	1
Invadolysin	chr3R:5970305-5971254	0.477447	0.000125935	0.790863	0.810915	0.00679073	1
E(Pc)	chr2R:7339718-7339817	0.126716	0.000126887	0.331398	0.807534	0.00685262	1
Pfk	chr2R:5998454-5999080	0.0362655	0.000129329	0.172333	0.796264	0.00685809	1
nrv2	chr2L:6791701-6791841	0.0408513	0.000129547	0.830139	0.798015	0.00687794	1
enok	chr2R:19987079-19987163	0.00404605	0.000130342	0.942721	0.716989	0.00691051	1
eIF5	chrX:15883425-15883509	0.646201	0.000131658	0.520045	0.823047	0.00692253	1
Syt1	chr2L:2779206-2782839	0.780069	0.000132147	0.892173	0.836665	0.00692358	1
Tm1	chr3R:11133312-11133987	0.318375	0.00013219	0.0110289	0.810302	0.00693054	1
nrv2	chr2L:6791701-6791951	0.0419977	0.000132474	0.840802	0.798395	0.00695379	1
Epac	chr2R:2686275-2686432	0.740811	0.000133428	0.474398	0.832312	0.00698324	1
alpha-Man-IIb	chr3R:11636580-11636774	0.247744	0.000134647	0.0593416	0.809779	0.00700102	1
Mbs	chr3L:16059123-16059209	0.0920197	0.000135389	0.28746	0.80581	0.00700374	1
CG15012	chr3L:4291201-4291623	0.0264052	0.000135503	0.0419837	0.790533	0.00708181	1
spz	chr3R:22891821-22892202	0.265189	0.000138346	0.171963	0.809934	0.00708748	1
sNPF	chr2L:20054077-20054221	0.498288	0.000138555	0.382592	0.810966	0.00709514	1
CG9935	chr4:656751-657093	0.238172	0.000138837	0.311612	0.809684	0.0071449	1
CG41265	chr2RHet:494405-495032	0.48642	0.000140657	0.312277	0.810937	0.00715712	1
CG1358	chr2R:3501966-3502037	0.533462	0.000141107	0.866523	0.811043	0.00719539	1
gish	chr3R:12118198-12118263	0.780794	0.000142526	0.985862	0.836744	0.00725465	1
CG30492	chr2R:3536088-3537409	0.89428	0.000144749	0.536189	0.852257	0.00726052	1
lola	chr2R:6414072-6414479	0.142837	0.000144971	0.144678	0.808052	0.0072889	1
Tm1	chr3R:11133312-11133975	0.336518	0.000146049	0.0120561	0.810401	0.00730728	1
Pde6	chr3R:10342328-10342481	0.330351	0.000146751	0.20601	0.810369	0.00738677	1
CG32091	chr3L:11627714-11628291	0.252347	0.000149306	0.194328	0.809822	0.00745629	1
beat-Ia	chr2L:16080446-16081688	0.135236	0.000151568	0.309247	0.807823	0.00746085	1
beat-Ia	chr2L:16080476-16081688	0.135209	0.000151717	0.309446	0.807822	0.00749119	1
CG41265	chr2RHet:494133-495032	0.451974	0.000152713	0.285622	0.810845	0.00754784	1
shep	chr3L:5154868-5154908	0.185567	0.000154586	0.0943458	0.80899	0.00757353	1
nrm	chr3L:23018186-23018219	0.341436	0.000155441	0.499945	0.810426	0.00770905	1
CG31689	chr2L:2736174-2736430	0.146303	0.000159857	0.0662408	0.808148	0.00776603	1
mrt	chr3R:23106707-23106865	0.450856	0.000161741	0.224972	0.810842	0.00781556	1
CG9813	chr3R:9205156-9205487	0.0869598	0.000163392	0.194951	0.805444	0.00786198	1
tomosyn	chrX:12527946-12527990	0.125942	0.000164951	0.773843	0.807506	0.00786954	1
pnt	chr3R:19171120-19171908	0.585936	0.000165206	0.654229	0.815792	0.00801518	1
sdk	chrX:580781-581107	0.239944	0.000170176	0.622619	0.809702	0.00801967	1
Idgf3	chr2L:16451164-16451307	0.136955	0.000170331	0.384998	0.807877	0.00801981	1
Idgf3	chr2L:16451190-16451307	0.136955	0.000170336	0.385002	0.807877	0.00816361	1
CG33234	chr3L:2662328-2662586	0.0414221	0.000175359	0.660241	0.798207	0.00822544	1
sdk	chrX:580872-581159	0.237444	0.000177554	0.630832	0.809677	0.00827452	1
Cp110	chrX:21888894-21889294	0.290516	0.000179312	0.0457455	0.810126	0.00828022	1
Tsp42Ee	chr2R:2904752-2904880	0.140325	0.000179517	0.046541	0.807979	0.00837569	1
SNF4Agamma	chr3R:17025433-17025485	0.195279	0.000182979	0.238666	0.809146	0.00839779	1
gfA	chrX:19241671-19242486	0.260515	0.000183788	0.527469	0.809895	0.00839782	1
gfA	chrX:19241671-19242477	0.260516	0.000183789	0.527469	0.809895	0.00853778	1
Tm1	chr3R:11121149-11121266	0.873853	0.00018898	0.00880265	0.849324	0.00868225	1
Mef2	chr2R:5803630-5804396	0.919602	0.000194464	0.984258	0.855739	0.00869838	1
Rab11	chr3R:16937377-16937577	0.226029	0.000195084	0.378825	0.809553	0.00871251	1
Idgf3	chr2L:16450940-16451307	0.148583	0.000195629	0.371091	0.808209	0.00871878	1
CG1718	chrX:21164391-21164557	0.359798	0.000195871	0.390097	0.810514	0.00872126	1
rhea	chr3L:8555633-8556136	0.107069	0.000195967	0.168866	0.806694	0.00877811	1
Nipsnap	chrX:15964395-15964901	0.16485	0.000198175	0.0172883	0.808596	0.00883973	1
Vmat	chr2R:9405741-9406360	0.240553	0.000200592	0.392687	0.809709	0.00887594	1
APP-BP1	chr3L:11091192-11091397	0.180718	0.000202024	0.105884	0.808906	0.00889399	1
APP-BP1	chr3L:11091192-11091390	0.180962	0.000202741	0.106121	0.80891	0.00894869	1
CG3860	chr2R:19882499-19882605	0.463148	0.000204927	0.051272	0.810877	0.0089972	1
CG31665	chr2L:1837229-1837406	0.332785	0.000206883	0.164141	0.810382	0.00901917	1
trol	chrX:2415567-2415821	0.246009	0.000207774	0.615478	0.809762	0.00907141	1
Pkc53E	chr2R:12815630-12815656	0.240949	0.000209906	0.141411	0.809713	0.0090795	1
CG31689	chr2L:2736130-2736430	0.138235	0.000210238	0.073552	0.807916	0.00909167	1
APP-BP1	chr3L:11091192-11091852	0.182099	0.000210738	0.104263	0.80893	0.00917144	1
lola	chr2R:6422355-6422533	0.70481	0.000214042	0.318552	0.829008	0.00920642	1
lola	chr2R:6422355-6422534	0.705074	0.000215505	0.319108	0.829033	0.00923799	1
Vmat	chr2R:9406043-9406360	0.238424	0.000216833	0.405833	0.809687	0.00925376	1
CG30492	chr2R:3536088-3537490	0.933624	0.000217499	0.544768	0.857597	0.00928787	1
Picot	chr2R:12551020-12551709	0.0166617	0.000218946	0.0237168	0.781439	0.00932161	1
lola	chr2R:6422355-6422583	0.706059	0.000220386	0.320846	0.829125	0.00932703	1
lola	chr2R:6422355-6422521	0.704242	0.000220618	0.318292	0.828955	0.00936037	1
CG13165	chr2R:8167278-8168003	0.564655	0.00022205	0.577798	0.812896	0.00936048	1
swm	chr2L:19493406-19493474	0.121864	0.000222055	0.0282119	0.807352	0.00938556	1
Caki	chr3R:17643540-17643807	0.730043	0.000223138	0.497799	0.831303	0.00939918	1
Eaat1	chr2L:9337809-9337932	0.0830792	0.000223728	0.535242	0.805134	0.00949115	1
lola	chr2R:6409533-6410639	0.404554	0.00022775	0.417561	0.810694	0.00950703	1
CG42542	chr3R:11027988-11028723	0.0105186	0.000228451	0.0210753	0.7685	0.00950775	1
CG42542	chr3R:11027988-11028725	0.0105196	0.000228483	0.0210789	0.768503	0.00954023	1
shep	chr3L:5154823-5154908	0.160532	0.000229923	0.123246	0.808501	0.00958772	1
sar1	chr3R:18184094-18184213	0.643914	0.000232044	0.364613	0.822795	0.00964259	1
kek3	chr2L:15552707-15552873	0.16242	0.000234517	0.183735	0.808543	0.00965276	1
CG30419	chr2R:20102110-20103108	0.160879	0.000234978	0.235637	0.808508	0.00967906	1
l(1)G0196	chrX:21888929-21889625	0.854255	0.000236174	0.756162	0.846398	0.00968527	1
l(1)G0196	chrX:21889016-21889625	0.851752	0.000236457	0.753187	0.846017	0.00970849	1
kek3	chr2L:15552481-15552873	0.161714	0.000237519	0.185744	0.808527	0.00972139	1
PNUTS	chr2L:870851-871274	0.00745523	0.000238111	0.00788239	0.754575	0.00973424	1
CG34365	chr2R:11309032-11309148	0.84347	0.000238702	0.345133	0.844739	0.00977137	1
ab	chr2L:11237356-11237554	0.0499682	0.000240417	0.575882	0.800556	0.00981354	1
spz	chr3R:22892041-22892202	0.391517	0.000242379	0.367152	0.810645	0.00987395	1
Idgf2	chr2L:16447214-16447505	0.710595	0.000245216	0.0447092	0.829547	0.00988174	1
CG42458	chr3L:7446760-7447406	0.733348	0.000245584	0.155708	0.831594	0.00990718	1
SKIP	chr3R:17975089-17975144	0.843929	0.00024679	0.548047	0.844811	0.00994402	1
CG13624	chr3R:20386104-20386544	0.109319	0.000248546	0.607877	0.806805	0.00995145	1
shep	chr3L:5154840-5154908	0.186357	0.000248902	0.13331	0.809003	0.0101235	1
APP-BP1	chr3L:11089572-11090161	0.423545	0.00025564	0.385359	0.810758	0.0102256	1
lig	chr2R:3957376-3957784	0.0523454	0.000259699	0.0950006	0.801075	0.0102752	1
shep	chr3L:5154835-5154903	0.26023	0.00026169	0.186737	0.809892	0.0103023	1
CG42330	chr3L:8241832-8242051	0.472993	0.000262781	0.572912	0.810903	0.010418	1
Gap1	chr3L:9832197-9833436	0.364481	0.000267477	0.653188	0.810535	0.0104554	1
Gap1	chr3L:9832197-9833422	0.366902	0.00026901	0.652158	0.810545	0.0104557	1
E(Pc)	chr2R:7339722-7339888	0.248432	0.000269021	0.500933	0.809785	0.0104904	1
CG12090	chr3L:1526334-1526398	0.335451	0.000270449	0.589654	0.810396	0.0105024	1
CG30463	chr2R:12603659-12603716	0.164458	0.000270943	0.0725628	0.808587	0.0105551	1
RpL29	chr2R:17181135-17181294	0.000519765	0.000273125	0.00340795	0.428249	0.0106908	1
eIF5	chrX:15882650-15883142	0.507574	0.000278805	0.725877	0.810987	0.010704	1
CG15012	chr3L:4291130-4291623	0.0482276	0.000279363	0.0503957	0.800144	0.0107164	1
APP-BP1	chr3L:11089756-11090161	0.430277	0.000279886	0.406719	0.81078	0.0108005	1
CG30190	chr2R:18815039-18815152	0.247609	0.00028346	0.463988	0.809778	0.0108356	1
CG30193	chr2R:18815039-18815152	0.247609	0.00028346	0.463988	0.809778	0.0108356	1
CG18177	chr3L:9721085-9721249	0.66381	0.000284963	0.390473	0.82494	0.0108493	1
Dscam	chr2R:3247796-3247919	0.0482657	0.000285548	0.0346837	0.800154	0.0108899	1
CG11155	chr4:1156165-1156547	0.855188	0.000287298	0.922553	0.84654	0.0108962	1
slo	chr3R:20532995-20534111	0.000251133	0.00028757	0.197064	0.369442	0.0109076	1
Dscam3	chr3R:13300802-13301065	0.540265	0.000288063	0.247121	0.811057	0.0110358	1
RpL29	chr2R:17181274-17181294	0.000660981	0.000293542	0.00396694	0.461001	0.0110994	1
l(2)44DEa	chr2R:4559779-4559911	0.270577	0.000296292	0.461995	0.809978	0.0111891	1
CG42330	chr3L:8234663-8234731	0.800194	0.000300198	0.975687	0.838807	0.0111989	1
CG31665	chr2L:1837173-1837406	0.39781	0.000300631	0.198932	0.810669	0.011237	1
Idgf3	chr2L:16452194-16453042	0.0911523	0.000302302	0.00966116	0.80575	0.0112607	1
CG13624	chr3R:20386289-20386544	0.100216	0.000303349	0.841475	0.806324	0.0113793	1
CG11155	chr4:1156165-1156676	0.854253	0.00030862	0.911152	0.846398	0.011381	1
lola	chr2R:6389863-6389967	0.020656	0.000308698	0.284798	0.78582	0.0113857	1
CG42330	chr3L:8234914-8234982	0.0998572	0.00030891	0.834937	0.806303	0.0113946	1
Dscam	chr2R:3243191-3243314	0.356498	0.000309305	0.41493	0.810499	0.0114826	1
Pkn	chr2R:5159490-5159679	0.0156511	0.000313098	0.0123907	0.779987	0.0115006	1
Caki	chr3R:17616431-17616499	0.55012	0.000313875	0.783942	0.811077	0.0116327	1
CG5973	chr2L:7440710-7440962	0.680162	0.000319432	0.21902	0.826616	0.0117116	1
rhea	chr3L:8556598-8557007	0.112618	0.000322784	0.779282	0.806961	0.0117419	1
CG33234	chr3L:2663516-2663622	0.499165	0.000324076	0.857234	0.810968	0.0118567	1
Caps	chr4:1250828-1250964	0.562394	0.00032901	0.404094	0.812577	0.0118875	1
CG3860	chr2R:19882499-19882575	0.55318	0.000330344	0.068562	0.811252	0.0119307	1
CG31665	chr2L:1837191-1837406	0.408854	0.000332219	0.19478	0.810709	0.0120394	1
CG9027	chr2R:7268691-7269099	0.0746058	0.000336976	0.367436	0.804346	0.0121053	1
CG3287	chr2R:2698527-2698653	0.992854	0.00033988	0.980671	0.864945	0.0121252	1
CG13185	chr2R:7763969-7764120	0.717268	0.00034076	0.457592	0.83016	0.0123681	1
Rim	chr3R:13701601-13701669	0.000325302	0.000351655	0.039796	0.381691	0.0124611	1
CG13293	chr3L:6082890-6084044	0.758363	0.000355895	0.309916	0.83424	0.0125298	1
Mitf	chr4:1219484-1219801	0.503428	0.000359049	0.995433	0.810978	0.0125633	1
CG5973	chr2L:7440710-7440851	0.503367	0.000360593	0.394812	0.810978	0.0126733	1
Mitf	chr4:1219457-1219801	0.498755	0.000365709	0.995496	0.810967	0.0126869	1
CG1358	chr2R:3507838-3507944	0.213056	0.000366343	0.427139	0.809395	0.012692	1
CG30419	chr2R:20102499-20103108	0.194303	0.00036658	0.572098	0.809131	0.0127138	1
cac	chrX:11850955-11850957	0.835731	0.000367603	0.32109	0.843527	0.0128045	1
Caps	chr4:1250834-1250964	0.539024	0.000371879	0.399304	0.811055	0.0128065	1
hoe2	chr2L:4935509-4935910	0.0882978	0.000371972	0.0439157	0.805545	0.012908	1
Csk	chr3R:7475807-7476511	0.134721	0.000376801	0.290442	0.807806	0.0129913	1
tai	chr2L:9227671-9227739	0.168977	0.000380802	0.181184	0.808682	0.0129945	1
Gs2	chrX:11318298-11318487	0.129622	0.000380959	0.671625	0.807637	0.0129945	1
Gs2	chrX:11318303-11318487	0.129621	0.000380959	0.671623	0.807637	0.0130056	1
Cda5	chr2L:25370-26688	0.844279	0.000381492	0.717367	0.844865	0.0130061	1
Cda5	chr2L:25402-26688	0.844294	0.000381516	0.717389	0.844867	0.0130063	1
Cda5	chr2L:25357-26688	0.844306	0.000381526	0.717387	0.844869	0.0131509	1
eas	chrX:16172612-16173002	0.0157132	0.000388561	0.0166537	0.780082	0.0131604	1
CG42533	chr2L:7477182-7478783	0.832444	0.000389025	0.0388237	0.843006	0.0132997	1
Tsp42Ee	chr2R:2904518-2904592	0.547582	0.000395903	0.682971	0.811072	0.0133843	1
rdgC	chr3L:20253962-20254089	0.258193	0.00040013	0.787746	0.809874	0.0134461	1
hoe1	chr2L:4925829-4926278	0.873925	0.000403238	0.562358	0.849335	0.0134853	1
CG11155	chr4:1156165-1157251	0.867778	0.00040522	0.850922	0.848429	0.0136107	1
CG7565	chr3L:8084132-8084872	0.354607	0.000411619	0.600006	0.81049	0.0136108	1
CG7565	chr3L:8084132-8084908	0.354661	0.000411621	0.600065	0.81049	0.0136346	1
bol	chr3L:9094048-9095907	0.0293185	0.000412847	0.160094	0.792593	0.0136409	1
Caki	chr3R:17616431-17616460	0.353186	0.000413171	0.60688	0.810483	0.0137875	1
CG11155	chr4:1156165-1157162	0.864319	0.000420775	0.857762	0.847915	0.0137913	1
hoe1	chr2L:4925829-4926346	0.878403	0.000420973	0.557575	0.849988	0.0139292	1
lig	chr2R:3960632-3960739	0.157914	0.000428238	0.488843	0.80844	0.0139576	1
CG33234	chr3L:2663516-2663826	0.487766	0.000429748	0.859431	0.81094	0.0139929	1
Xe7	chr3R:1494875-1495050	0.457933	0.00043163	0.234352	0.810862	0.0141118	1
CG13624	chr3R:20402899-20403171	0.237659	0.000438018	0.0678207	0.809679	0.0141572	1
CG9003	chr2R:7538829-7539204	0.214406	0.000440479	0.167174	0.809413	0.014184	1
Dscam	chr2R:3238086-3238209	0.0961375	0.000441933	0.821305	0.806079	0.0142119	1
rl	chr2RHet:251677-251871	0.691618	0.000443455	0.99237	0.827748	0.0143243	1
CG2217	chr3R:26247185-26248707	0.246857	0.000449635	0.019232	0.80977	0.0143376	1
CG2217	chr3R:26247185-26248693	0.246994	0.000450374	0.0192452	0.809772	0.0143431	1
Vmat	chr2R:9405314-9405644	0.537804	0.000450677	0.326515	0.811052	0.0144176	1
Atpalpha	chr3R:16789073-16789141	0.339708	0.000454818	0.605848	0.810418	0.0144586	1
Gs2	chrX:11318315-11318487	0.16548	0.000457116	0.643467	0.808609	0.0144589	1
nwk	chr3L:9131777-9131797	0.870105	0.000457131	0.911692	0.848773	0.0145533	1
Pkc53E	chr2R:12813851-12814312	0.573817	0.000462455	0.18822	0.814167	0.0146205	1
CG13624	chr3R:20402899-20403196	0.243516	0.000466278	0.0712566	0.809738	0.0146717	1
CG30428	chr2R:21141651-21144609	0.651167	0.000469208	0.382671	0.823591	0.0147092	1
Calx	chr3R:16817297-16817402	0.224992	0.000471365	0.29254	0.809541	0.0148134	1
Hdc	chr2R:6132381-6133588	0.439967	0.000477406	0.541785	0.81081	0.0148134	1
Hdc	chr2R:6132381-6133582	0.439964	0.000477406	0.541785	0.81081	0.0149599	1
CG3625	chr2L:286307-287197	0.0020734	0.000486013	0.0371978	0.649661	0.0149643	1
gw	chr4:681207-681254	0.0351943	0.000486274	0.206492	0.79579	0.0149645	1
gw	chr4:681207-681257	0.0351948	0.000486282	0.206495	0.795791	0.0150665	1
CG12858	chr2R:10627432-10628867	0.119455	0.000492366	0.104198	0.807256	0.0151932	1
CG3287	chr2R:2698512-2698680	0.982524	0.000500013	0.98317	0.863718	0.0154066	1
Parp	chr3RHet:1964215-1964748	0.631291	0.000513138	0.00807936	0.82137	0.0156104	1
Cip4	chr3L:4363748-4363974	0.518461	0.000525971	0.526114	0.811012	0.0157126	1
CG3860	chr2R:19882351-19882886	0.694027	0.000532522	0.212244	0.827981	0.0157457	1
Ca-P60A	chr2R:19823103-19823241	0.000200787	0.000534664	0.000476738	0.356847	0.0157474	1
Ca-P60A	chr2R:19823103-19823221	0.000200816	0.000534772	0.000476829	0.356856	0.0157622	1
sbb	chr2R:14169750-14170749	0.0165171	0.00053573	0.426413	0.781242	0.0158774	1
CG41265	chr2RHet:495109-495242	0.0595826	0.00054325	0.0729021	0.802403	0.0158996	1
CG34347	chr3R:27195958-27196502	0.0109424	0.000544708	0.212866	0.769839	0.0159047	1
CG32666	chrX:11387166-11387230	0.00183068	0.000545045	0.0324227	0.633484	0.015906	1
CG32666	chrX:11387162-11387230	0.00183104	0.000545128	0.0324221	0.63351	0.0159194	1
CG9003	chr2R:7538320-7538729	0.112818	0.000546015	0.239159	0.80697	0.0159518	1
CG42533	chr2L:7477182-7478792	0.784551	0.000548157	0.0561362	0.837151	0.0160263	1
Doa	chr3R:24743842-24743910	0.197866	0.000553118	0.0466811	0.809185	0.0160896	1
CG11155	chr4:1156207-1156547	0.852956	0.000557366	0.874415	0.846201	0.0161217	1
MRP	chr2L:12737398-12737618	0.00837228	0.000559531	0.000764947	0.759753	0.0161484	1
eIF5	chrX:15882650-15883301	0.487586	0.000561336	0.661413	0.81094	0.0161844	1
CG11155	chr4:1156165-1157970	0.862218	0.000563786	0.808256	0.847601	0.0162241	1
npf	chr3R:12436487-12436776	0.448419	0.000566495	0.729014	0.810835	0.0162762	1
ine	chr2L:4474332-4475296	0.366289	0.000570067	0.899904	0.810542	0.0162765	1
CG3860	chr2R:19882351-19882706	0.699376	0.000570092	0.232578	0.828494	0.0162978	1
Slob	chr2L:7675012-7675078	0.779967	0.000571555	0.73866	0.836654	0.0163491	1
Eb1	chr2R:2641118-2641186	0.399419	0.00057511	0.870562	0.810675	0.0163614	1
eIF5	chrX:15882650-15883359	0.488781	0.000575965	0.662479	0.810943	0.0164287	1
Dscam	chr2R:3242796-3242919	0.79124	0.000580666	0.193691	0.837866	0.0164341	1
CG2767	chr3R:3831939-3832498	0.899935	0.000581043	0.414949	0.853049	0.0164352	1
PMCA	chr4:350897-350965	0.267034	0.000581122	0.141959	0.809949	0.0165066	1
LIMK1	chrX:12485964-12486226	0.158149	0.000586154	0.0373333	0.808446	0.0165109	1
npf	chr3R:12436497-12436776	0.453132	0.000586458	0.736276	0.810849	0.0165272	1
blot	chr3L:17408321-17408929	0.045513	0.000587614	0.0296403	0.79944	0.0165359	1
Mitf	chr4:1222783-1223321	0.353678	0.00058823	0.144496	0.810486	0.0165685	1
CG12858	chr2R:10626828-10628867	0.181651	0.000590547	0.101976	0.808922	0.0167337	1
CG5001	chr2L:1186133-1186452	0.74148	0.000602442	0.383873	0.832375	0.0168283	1
EDTP	chr2R:13319608-13320213	0.0396466	0.000609367	0.373294	0.797594	0.0168287	1
Dyb	chr2R:8325152-8325395	0.0884965	0.000609393	0.0991151	0.80556	0.0168698	1
CG34347	chr3R:27195958-27196498	0.0105065	0.000612428	0.234683	0.76846	0.017048	1
CG5001	chr2L:1186193-1186452	0.739691	0.000625752	0.393416	0.832205	0.0170723	1
CG12858	chr2R:10627079-10628867	0.183506	0.000627592	0.106245	0.808955	0.0172124	1
Mef2	chr2R:5802967-5804417	0.813059	0.000638316	0.598857	0.840126	0.0172224	1
Mef2	chr2R:5803027-5804396	0.807641	0.000639087	0.589033	0.839575	0.0172452	1
mrt	chr3R:23106392-23106460	0.576432	0.000640848	0.106878	0.814523	0.0173117	1
CG8929	chr2R:16214949-16215074	0.43345	0.000646029	0.233302	0.81079	0.0173142	1
CG15522	chr3R:25752856-25753239	0.247742	0.000646218	0.742404	0.809779	0.0173142	1
EDTP	chr2R:13319615-13320213	0.0421967	0.000646224	0.383003	0.798458	0.017316	1
Mef2	chr2R:5803004-5804396	0.811652	0.000646362	0.593574	0.839984	0.0173373	1
Mef2	chr2R:5803017-5804396	0.808046	0.00064803	0.589376	0.839617	0.0173614	1
CYLD	chr2L:10295850-10296110	0.56556	0.000649921	0.523144	0.813024	0.0173618	1
CYLD	chr2L:10295854-10296110	0.56557	0.000649957	0.523153	0.813025	0.0173619	1
CYLD	chr2L:10295851-10296110	0.565567	0.000649959	0.523153	0.813025	0.017362	1
CYLD	chr2L:10295846-10296110	0.565558	0.000649967	0.523151	0.813023	0.0173695	1
CG34400	chr3L:13866022-13866114	0.117705	0.000650557	0.383964	0.807183	0.0173829	1
Corin	chr2R:3448448-3449141	0.954065	0.000651616	0.665458	0.860221	0.0174012	1
mnd	chr3L:14981012-14981349	0.00572107	0.000653061	0.0179983	0.740608	0.017407	1
lola	chr2R:6430410-6430767	0.689973	0.000653518	0.435552	0.827587	0.0174677	1
Pde1c	chr2L:11833260-11833373	0.00770356	0.000658337	0.00448442	0.756092	0.0174838	1
CG15012	chr3L:4291899-4292009	0.0647021	0.000659625	0.0706036	0.803166	0.0175044	1
CG10508	chr3L:21207821-21207889	0.120124	0.000661271	0.0376885	0.807283	0.0175119	1
CG10462	chr2L:19732076-19732676	0.0195398	0.00066187	0.0923125	0.784772	0.0175322	1
CG10462	chr2L:19732083-19732676	0.0194196	0.000663505	0.091478	0.784652	0.0175323	1
CG10462	chr2L:19732080-19732676	0.01942	0.00066351	0.0914792	0.784652	0.0175691	1
PNUTS	chr2L:870470-871274	0.0152138	0.000666473	0.0318576	0.779301	0.0175958	1
CG9027	chr2R:7268827-7269099	0.0751228	0.000668635	0.608313	0.804399	0.0176532	1
gw	chr4:680595-681050	0.0407851	0.000673303	0.0190877	0.797993	0.0176694	1
yrt	chr3R:9255820-9256472	0.945651	0.000674629	0.990549	0.859153	0.0176858	1
APP-BP1	chr3L:11091242-11091852	0.314955	0.00067597	0.13815	0.810282	0.0176917	1
spz	chr3R:22891821-22892101	0.0877874	0.000676458	0.15102	0.805507	0.0177095	1
Dyb	chr2R:8338419-8338833	0.0859255	0.000677913	0.04602	0.805364	0.0177197	1
CG10103	chr3L:6749323-6749619	0.773758	0.000678755	0.306618	0.835973	0.0177225	1
CG10103	chr3L:6749323-6749631	0.773796	0.000678983	0.306641	0.835977	0.017732	1
Dscam	chr2R:3246521-3246644	0.0531153	0.000679769	0.605602	0.801234	0.0177562	1
Rb97D	chr3R:22701266-22701485	0.0290696	0.000681772	0.217935	0.792432	0.0177566	1
Rb97D	chr3R:22701266-22701533	0.0290665	0.000681801	0.217862	0.79243	0.0177567	1
Rb97D	chr3R:22701266-22701464	0.0290758	0.000681813	0.217924	0.792436	0.0177577	1
Rb97D	chr3R:22701266-22701474	0.029069	0.000681894	0.217907	0.792432	0.0177578	1
Rb97D	chr3R:22701266-22701505	0.0290681	0.0006819	0.217964	0.792431	0.0177586	1
Rb97D	chr3R:22701266-22701473	0.0290746	0.000681966	0.217927	0.792436	0.0177598	1
Rb97D	chr3R:22701266-22701486	0.0290791	0.000682064	0.217983	0.792439	0.0177763	1
Mapmodulin	chr2R:13759070-13759166	0.0292598	0.000683433	0.0621944	0.792555	0.0177773	1
n-syb	chr3L:1637723-1637883	0.248257	0.000683515	0.3353	0.809784	0.0178149	1
Ptp99A	chr3R:25309191-25310486	0.542152	0.000686643	0.425244	0.811061	0.0178305	1
ire-1	chr3R:15686213-15686483	0.268113	0.000687942	0.426372	0.809958	0.0178376	1
CG4341	chr2L:957279-958163	0.462022	0.000688539	0.684836	0.810874	0.0178551	1
Mef2	chr2R:5802673-5804396	0.828936	0.000690008	0.581664	0.842446	0.0179249	1
Actn	chrX:1936080-1936400	0.0519436	0.000695878	0.865691	0.800991	0.0179258	1
n-syb	chr3L:1637723-1637869	0.247243	0.000695956	0.342183	0.809774	0.0179272	1
CG17698	chr3L:23739124-23739192	0.293151	0.000696077	0.550681	0.810144	0.0179409	1
CG3287	chr2R:2699407-2699588	0.920454	0.000697236	0.970609	0.855853	0.0179499	1
snama	chr2R:19974285-19974353	0.065322	0.000697996	0.488829	0.80325	0.0179537	1
n-syb	chr3L:1637723-1637846	0.242108	0.000698323	0.341225	0.809724	0.0180379	1
Xe7	chr3R:1494349-1495156	0.544706	0.000705515	0.687254	0.811066	0.0180684	1
E(Pc)	chr2R:7339548-7339888	0.313552	0.000708137	0.624403	0.810274	0.0180859	1
CG6231	chr3R:15453166-15453476	0.750902	0.000709646	0.286445	0.833378	0.0180902	1
CG5973	chr2L:7440710-7440958	0.648306	0.000710013	0.252505	0.823279	0.018094	1
CG10462	chr2L:19732080-19732464	0.0201488	0.000710349	0.0852765	0.785358	0.0181011	1
pnt	chr3R:19119573-19120960	0.314557	0.000710963	0.1082	0.81028	0.0181594	1
CG4341	chr2L:957279-958100	0.468102	0.000716031	0.67339	0.81089	0.0181698	1
Cka	chr2L:8036837-8036893	0.984732	0.000716932	0.643505	0.863982	0.0181784	1
mspo	chr2R:10600317-10601226	0.0571933	0.000717684	0.0314337	0.802002	0.0181904	1
Glut1	chr3L:950947-951133	0.816379	0.000718738	0.398465	0.840461	0.0182095	1
CG10462	chr2L:19732080-19732468	0.0204528	0.000720412	0.0861024	0.785638	0.0182153	1
CG30193	chr2R:18813299-18814694	0.0184997	0.000720919	0.352347	0.783684	0.0182213	1
mspo	chr2R:10600317-10601142	0.0571527	0.000721452	0.0314781	0.801995	0.0182664	1
TepII	chr2L:7697007-7697157	0.386196	0.000725426	0.27435	0.810625	0.0182759	1
eIF5	chrX:15883471-15883509	0.593058	0.000726271	0.477644	0.816719	0.0183169	1
CG10462	chr2L:19732168-19732464	0.0202278	0.000729919	0.0881984	0.785431	0.0183642	1
Arc-p34	chr2L:20417061-20417667	0.0491362	0.00073414	0.178073	0.800363	0.0183647	1
Arc-p34	chr2L:20416980-20417667	0.0491371	0.00073419	0.178067	0.800363	0.0184225	1
Nckx30C	chr2L:9714738-9717763	0.236444	0.000739394	0.23543	0.809666	0.0184356	1
cv-c	chr3R:10306364-10307304	0.651069	0.00074058	0.721573	0.82358	0.0184624	1
unc-104	chr2R:12649602-12649604	0.841029	0.000743008	0.73543	0.844359	0.0184632	1
Gs2	chrX:11317951-11318487	0.157597	0.000743088	0.866964	0.808433	0.0184987	1
Ih	chr2R:10177983-10178051	0.260017	0.000746314	0.593339	0.80989	0.0185205	1
mrt	chr3R:23106299-23106437	0.457304	0.00074831	0.0896244	0.81086	0.0185927	1
CG3860	chr2R:19882351-19882429	0.725103	0.000754962	0.322436	0.830865	0.0186257	1
Actn	chrX:1936080-1936374	0.0859589	0.000758021	0.840577	0.805367	0.0186445	1
cora	chr2R:15130760-15131370	0.337491	0.000759775	0.221345	0.810406	0.0186622	1
foxo	chr3R:9902127-9902256	0.324166	0.000761426	0.519375	0.810335	0.0186672	1
cora	chr2R:15130760-15131263	0.337724	0.000761891	0.220806	0.810407	0.0186672	1
cora	chr2R:15130760-15131257	0.337724	0.000761893	0.220806	0.810407	0.0186673	1
cora	chr2R:15130760-15131256	0.337724	0.000761895	0.220807	0.810407	0.0186898	1
cv-c	chr3R:10306364-10307272	0.652569	0.000764006	0.721819	0.823742	0.0187029	1
cora	chr2R:15130760-15131502	0.337719	0.000765238	0.221536	0.810407	0.0187211	1
CG31352	chr3R:5521098-5521245	0.986848	0.000766948	0.801025	0.864234	0.0187503	1
CG9027	chr2R:7268782-7269099	0.0690738	0.000769703	0.550421	0.803728	0.0187735	1
Mef2	chr2R:5802318-5804396	0.786458	0.000771902	0.567315	0.837356	0.0187751	1
dmondo	chr2L:21290649-21291131	0.502642	0.000772049	0.461154	0.810976	0.0187754	1
pan	chr4:115463-115628	0.010286	0.000772084	0.0610094	0.76772	0.018966	1
LIMK1	chrX:12486001-12486226	0.153356	0.000785406	0.0486149	0.808331	0.0191068	1
if	chrX:16676503-16676706	0.437456	0.000795366	0.225139	0.810802	0.019119	1
CG13698	chr3L:18098681-18099276	0.0264415	0.000796238	0.0547194	0.790561	0.0191191	1
CG13698	chr3L:18098681-18099266	0.0264425	0.000796246	0.0547208	0.790562	0.0191471	1
CG8949	chrX:16963051-16964464	0.0271255	0.000798236	0.165962	0.791082	0.0191668	1
Tsp42Ee	chr2R:2904518-2904880	0.381895	0.000799649	0.686782	0.810608	0.0192427	1
PyK	chr3R:18194507-18194587	0.512757	0.000805082	0.616821	0.810999	0.0192434	1
CG17838	chr3R:16635801-16635869	0.0830618	0.000805134	0.992095	0.805133	0.0192935	1
CG9027	chr2R:7268822-7269099	0.0821464	0.000808744	0.615801	0.805055	0.0194444	1
CG31710	chr2L:9705780-9706032	0.896639	0.000819684	0.486594	0.852589	0.0195056	1
Cap-H2	chr3R:6587566-6587747	0.0617526	0.00082416	0.808429	0.802742	0.019585	1
Sema-2a	chr2R:12404275-12404846	0.287777	0.000829998	0.431576	0.810107	0.019663	1
CG5261	chr2L:7428281-7428679	0.10969	0.000835765	0.628652	0.806823	0.0197035	1
dpr12	chr2R:1741217-1741306	0.854689	0.000838775	0.545285	0.846464	0.0197203	1
CG17528	chr2R:702931-705235	0.995547	0.00084002	0.899649	0.865261	0.0197455	1
chic	chr2L:5980209-5980481	0.0176046	0.000841904	0.120356	0.782648	0.019829	1
bip2	chr4:480134-480767	0.221273	0.000848152	0.608918	0.809497	0.0198385	1
CG42494	chr3L:3185336-3185422	0.211872	0.000848867	0.00324928	0.80938	0.0199103	1
Actn	chrX:1936080-1936471	0.0606282	0.00085428	0.872398	0.802569	0.019932	1
tomosyn	chrX:12529765-12530316	0.709535	0.000855915	0.348836	0.829449	0.0200504	1
Cap-H2	chr3R:6587494-6587747	0.0799149	0.000864921	0.803761	0.804859	0.0201238	1
trol	chrX:2391351-2391521	0.335186	0.000870541	0.169052	0.810394	0.0201922	1
CG15894	chrX:6211427-6211588	0.0514807	0.000875811	0.603383	0.800892	0.0202661	1
tutl	chr2L:4318907-4318977	0.834327	0.000881532	0.15295	0.843305	0.0202975	1
nwk	chr3L:9131682-9131797	0.882662	0.000883975	0.921269	0.850603	0.0202977	1
nwk	chr3L:9131677-9131797	0.882664	0.000883994	0.92127	0.850604	0.020312	1
Actn	chrX:1936080-1936360	0.0820192	0.000885107	0.873234	0.805044	0.0203482	1
CG6643	chr3R:20377596-20378147	0.204653	0.000887929	0.369447	0.809283	0.0204097	1
NTPase	chr2L:2884993-2885320	0.573133	0.000892748	0.230831	0.814074	0.0204187	1
PyK	chr3R:18194502-18194587	0.504109	0.000893455	0.563668	0.810979	0.0204459	1
CG2947	chrX:3684002-3684109	0.00327556	0.000895599	0.00535201	0.699076	0.0205533	1
CG3257	chr2R:20004304-20004495	0.651482	0.000904087	0.404192	0.823625	0.0206358	1
CG33144	chr2R:6627559-6628691	0.212646	0.000910665	0.0778729	0.80939	0.0206397	1
ey	chr4:724840-725899	0.177841	0.000910976	0.826641	0.808854	0.0206399	1
ey	chr4:724924-725899	0.177849	0.000910988	0.826643	0.808854	0.020694	1
CG5288	chr3L:8976223-8976573	0.0209205	0.00091533	0.265311	0.786053	0.0207056	1
lola	chr2R:6397300-6397641	0.464287	0.000916259	0.779138	0.81088	0.0207149	1
ey	chr4:725037-725899	0.177637	0.000917007	0.827407	0.80885	0.0207814	1
ey	chr4:725101-725899	0.179585	0.000922374	0.829747	0.808885	0.0208168	1
mtt	chr2R:4380726-4381925	0.797957	0.000925238	0.542756	0.838574	0.02082	1
Fps85D	chr3R:5198478-5198655	0.237772	0.000925494	0.0297616	0.80968	0.0208305	1
CG5288	chr3L:8976254-8976573	0.0208425	0.000926348	0.280471	0.785985	0.02091	1
ey	chr4:725237-725899	0.184066	0.000932821	0.822249	0.808964	0.0209465	1
CG3860	chr2R:19882351-19882442	0.724287	0.000935807	0.323528	0.830792	0.0209619	1
CG3287	chr2R:2698512-2699588	0.966355	0.000937072	0.971394	0.861753	0.0209768	1
CG1358	chr2R:3501439-3502039	0.229718	0.000938298	0.684525	0.809594	0.0210009	1
CG13830	chr3R:18900737-18901123	0.132792	0.000940277	0.0501226	0.807744	0.0210261	1
tomosyn	chrX:12529732-12530316	0.71715	0.00094235	0.381003	0.830149	0.0211432	1
blot	chr3L:17414454-17414739	0.333339	0.000952055	0.195054	0.810385	0.021274	1
CG34356	chr3L:9954707-9954886	0.0387948	0.000962991	0.0902074	0.79728	0.0213009	1
CG5594	chr2R:19795997-19796154	0.0111153	0.00096526	0.0133716	0.770357	0.0213123	1
CG3257	chr2R:20004312-20004495	0.66582	0.000966218	0.40825	0.82515	0.0213367	1
Nckx30C	chr2L:9713887-9717763	0.249058	0.00096828	0.240401	0.809791	0.0213905	1
Csk	chr3R:7461191-7461352	0.0351201	0.000972838	0.0769103	0.795757	0.0214619	1
ATPCL	chr2R:11888693-11888794	0.0234808	0.000978923	0.0249879	0.788037	0.0214626	1
ATPCL	chr2R:11888693-11888789	0.0234818	0.000978976	0.0249883	0.788038	0.0214684	1
rhea	chr3L:8556646-8556734	0.101845	0.000979478	0.804825	0.806416	0.0215033	1
spz	chr3R:22893080-22893217	0.312542	0.000982462	0.318303	0.810268	0.0215165	1
Rab11	chr3R:16937129-16937577	0.375112	0.000983595	0.614418	0.81058	0.0215699	1
CG13624	chr3R:20386104-20386229	0.182984	0.000988187	0.665904	0.808946	0.0215836	1
Tm1	chr3R:11128875-11128944	0.252641	0.000989363	0.0422599	0.809825	0.0215911	1
n-syb	chr3L:1637723-1637767	0.286659	0.00099001	0.422065	0.810099	0.0216424	1
CG5288	chr3L:8976242-8976573	0.0214857	0.00099445	0.275376	0.786531	0.0216473	1
CG13917	chr3L:1599979-1600846	0.449617	0.00099487	0.523135	0.810839	0.0217019	1
ine	chr2L:4474332-4475318	0.396015	0.000999614	0.845314	0.810662	0.0218047	1
PP2A-B'	chr3R:13993451-13993589	0.0440081	0.0010086	0.656324	0.799012	0.0218245	1
Rab8	chr3L:19861602-19861745	0.0260914	0.00101035	0.0131239	0.790284	0.021832	1
bol	chr3L:9100244-9100255	0.885969	0.00101101	0.657288	0.851078	0.0219123	1
CG31710	chr2L:9705780-9706196	0.901972	0.0010181	0.461821	0.853333	0.0219792	1
CG13830	chr3R:18900728-18901123	0.129886	0.00102405	0.0445005	0.807646	0.021982	1
Ptp99A	chr3R:25283295-25283363	0.800177	0.00102429	0.726448	0.838805	0.0220133	1
for	chr2L:3631805-3632283	0.965055	0.00102709	0.942275	0.861593	0.0220303	1
PP2A-B'	chr3R:13993418-13993589	0.0442885	0.00102861	0.649369	0.799094	0.0221425	1
nrv2	chr2L:6793228-6793373	0.00945247	0.0010387	0.727479	0.764627	0.0221642	1
CG5445	chrX:17196489-17196819	0.129441	0.00104066	0.188832	0.807631	0.0222237	1
CG9636	chr3R:4067720-4068013	0.37205	0.00104606	0.0417898	0.810567	0.0222524	1
ap	chr2R:1593989-1595611	0.737871	0.00104867	0.391757	0.832031	0.0222654	1
nudE	chr3L:9894443-9894591	0.0965777	0.00104985	0.625332	0.806106	0.0223153	1
Nipsnap	chrX:15964331-15964901	0.150843	0.00105442	0.0344772	0.808268	0.0223472	1
CG16947	chr2L:6465529-6465692	0.539193	0.00105734	0.60046	0.811055	0.0223777	1
nudE	chr3L:9894443-9894534	0.0983813	0.00106015	0.633973	0.806216	0.0223861	1
SWAP	chrX:936293-936465	0.558955	0.00106093	0.610176	0.812087	0.022463	1
CG11455	chr2L:155567-155784	0.295962	0.00106804	0.437053	0.810163	0.0225159	1
PP2A-B'	chr3R:13993350-13993589	0.0461838	0.00107295	0.638678	0.799621	0.0225776	1
CG1910	chr3R:27576367-27576398	0.294501	0.00107872	0.565599	0.810153	0.022598	1
Hsc70-5	chr2R:10140098-10140793	0.297188	0.00108064	0.524158	0.810171	0.0226357	1
PP2A-B'	chr3R:13993333-13993589	0.0475945	0.00108418	0.638817	0.799987	0.0226632	1
CG11537	chr3L:3133949-3134208	0.847127	0.00108677	0.686892	0.845306	0.0226642	1
sd	chrX:15712137-15712551	0.0592516	0.00108687	0.044409	0.80235	0.0226652	1
Ptp99A	chr3R:25309191-25310665	0.749774	0.00108697	0.440478	0.833246	0.0227715	1
CG11537	chr3L:3133949-3134223	0.854432	0.00109704	0.691717	0.846425	0.0227866	1
Sxl	chrX:6991978-6992086	0.0117975	0.00109848	0.142901	0.77226	0.0228012	1
Dat	chr2R:20026793-20027384	0.29676	0.00109988	0.944504	0.810168	0.0228713	1
CG5594	chr2R:19795997-19796168	0.0124139	0.00110659	0.0142456	0.773806	0.022876	1
CG5515	chr3R:20014392-20014596	0.263735	0.00110704	0.548597	0.809922	0.0229974	1
Hsc70-5	chr2R:10140051-10140793	0.2965	0.00111877	0.525015	0.810167	0.0230352	1
CG11537	chr3L:3133949-3134281	0.846502	0.00112245	0.692875	0.845209	0.0230605	1
Utx	chr2L:10278649-10278903	0.582889	0.00112492	0.828147	0.815389	0.0230605	1
SNF4Agamma	chr3R:17025250-17025485	0.184467	0.00112493	0.274734	0.808971	0.023061	1
Utx	chr2L:10278649-10278811	0.582894	0.00112497	0.828124	0.81539	0.0231721	1
CG34356	chr3L:9954737-9954886	0.054279	0.00113587	0.172775	0.801464	0.0231792	1
Dbp80	chr3LHet:2473582-2473752	0.473857	0.00113658	0.956754	0.810905	0.0231879	1
Ptp99A	chr3R:25309191-25312424	0.829508	0.00113744	0.40301	0.842537	0.0232398	1
PNUTS	chr2L:870451-871576	0.0567264	0.00114257	0.0700999	0.801919	0.0232691	1
CG1316	chr3L:4286172-4286870	0.818284	0.00114548	0.147208	0.840722	0.0232692	1
CG1316	chr3L:4286172-4286865	0.818285	0.00114549	0.147208	0.840722	0.0233048	1
Syb	chr2R:6137874-6138091	0.50248	0.00114905	0.725847	0.810976	0.0233449	1
CtBP	chr3R:8837328-8837501	0.399559	0.00115305	0.195661	0.810676	0.0233832	1
CG8974	chrX:15689922-15690082	0.811712	0.00115689	0.738789	0.83999	0.0234113	1
CG12414	chr3L:23276833-23280229	0.0749463	0.00115972	0.475473	0.804381	0.0235387	1
Ptp99A	chr3R:25309191-25311422	0.80724	0.00117263	0.399163	0.839534	0.0235646	1
Bsg	chr2L:8101167-8101235	0.607922	0.00117527	0.598792	0.818591	0.0235792	1
Dyb	chr2R:8324840-8325395	0.110447	0.00117676	0.0989492	0.80686	0.0235957	1
cno	chr3R:1010309-1010363	0.97334	0.00117845	0.888259	0.862609	0.023615	1
Dyb	chr2R:8324815-8325395	0.11061	0.00118042	0.0989063	0.806867	0.0236152	1
Dyb	chr2R:8324827-8325395	0.110611	0.00118044	0.0989065	0.806867	0.023644	1
CG3625	chr2L:290813-291031	0.168247	0.0011834	0.0486649	0.808667	0.0236634	1
Ptp99A	chr3R:25283291-25283363	0.77532	0.0011854	0.710895	0.836145	0.0236715	1
Caki	chr3R:17634339-17634409	0.396911	0.00118623	0.4533	0.810666	0.0236952	1
CG31665	chr2L:1855616-1855797	0.328098	0.00118868	0.991204	0.810357	0.0237167	1
CG33558	chr2R:2858398-2859159	0.185633	0.0011909	0.98903	0.808991	0.0237525	1
CG33558	chr2R:2858398-2859314	0.185918	0.00119461	0.989213	0.808996	0.0237526	1
CG33558	chr2R:2858398-2859251	0.185918	0.00119463	0.989214	0.808996	0.0237793	1
ire-1	chr3R:15686369-15686483	0.304827	0.0011974	0.469469	0.810221	0.0238006	1
Dyb	chr2R:8338419-8339037	0.0551834	0.00119962	0.107638	0.801637	0.02387	1
CG1311	chr3L:4277896-4278250	0.0800869	0.00120688	0.478553	0.804875	0.0238705	1
CG1311	chr3L:4277964-4278250	0.0800863	0.00120693	0.478546	0.804875	0.0239129	1
Ptp99A	chr3R:25309679-25312906	0.816205	0.00121138	0.399415	0.840443	0.0239238	1
CG8079	chr2R:11109233-11109322	0.671883	0.00121254	0.613542	0.825777	0.0239247	1
Ptp99A	chr3R:25309679-25312853	0.816611	0.00121263	0.399421	0.840484	0.0242355	1
CG30492	chr2R:3524975-3525046	0.234838	0.00124527	0.718853	0.809649	0.0242369	1
CG11148	chr4:874351-874393	0.0891689	0.00124541	0.946486	0.805609	0.0242496	1
CG11455	chr2L:155546-155784	0.296159	0.00124677	0.431563	0.810164	0.0242976	1
CG32647	chrX:12678495-12678555	0.0164259	0.00125189	0.175643	0.781116	0.0243232	1
CG15012	chr3L:4291875-4292009	0.0470193	0.00125464	0.0835661	0.799841	0.0243588	1
Dbp80	chr3LHet:2471058-2471126	0.462614	0.00125847	0.395519	0.810875	0.0245521	1
sda	chr3R:22769990-22771105	0.685064	0.00127944	0.784375	0.827105	0.0245521	1
sda	chr3R:22769990-22771092	0.685064	0.00127944	0.784375	0.827105	0.0245586	1
Ca-P60A	chr2R:19823026-19823203	0.000611769	0.00128015	0.000879964	0.449938	0.0245685	1
Sxl	chrX:6992034-6992084	0.0150067	0.00128125	0.125182	0.778963	0.0245686	1
sda	chr3R:22769969-22771035	0.685021	0.00128126	0.784671	0.8271	0.0245687	1
sda	chr3R:22769990-22771035	0.68502	0.00128126	0.784671	0.8271	0.0245688	1
Sxl	chrX:6992034-6992086	0.0150068	0.00128127	0.125184	0.778963	0.0245699	1
slo	chr3R:20532995-20534395	0.000193258	0.0012814	0.675272	0.354499	0.0245791	1
trol	chrX:2411547-2411615	0.0946234	0.0012824	0.28536	0.805983	0.0246	1
lama	chr3L:5347715-5348528	0.870718	0.0012847	0.923425	0.848864	0.0247105	1
bol	chr3L:9094707-9095907	0.0165742	0.00129691	0.175395	0.78132	0.0247543	1
CG31352	chr3R:5524773-5525426	0.581499	0.00130179	0.540388	0.815204	0.0247718	1
Aldh	chr2L:9390246-9391679	0.00393982	0.00130374	0.0445661	0.714889	0.024788	1
Sec16	chrX:12499738-12499961	0.0760229	0.00130555	0.688246	0.80449	0.0248014	1
Doa	chr3R:24732991-24733059	0.359861	0.00130705	0.857573	0.810514	0.0248044	1
CG34114	chr3R:6873035-6875525	0.589058	0.00130739	0.438152	0.816201	0.0248045	1
Sxl	chrX:6992034-6992068	0.0150221	0.0013074	0.12332	0.778988	0.0248628	1
bol	chr3L:9094736-9095907	0.0165096	0.00131394	0.176609	0.781232	0.0248843	1
CtBP	chr3R:8844757-8844860	0.613975	0.00131636	0.706752	0.819329	0.0248971	1
Caki	chr3R:17645376-17645488	0.217588	0.00131781	0.165783	0.809452	0.0249009	1
Tsp42Ee	chr2R:2899753-2899840	0.0978815	0.00131824	0.0979162	0.806186	0.0249019	1
rhea	chr3L:8566631-8567509	0.0215356	0.00131836	0.373249	0.786572	0.0249154	1
CG3287	chr2R:2698527-2699348	0.977565	0.00131988	0.97043	0.863122	0.0250728	1
CG8177	chr3L:9767322-9767589	0.036632	0.00133782	0.137008	0.79642	0.0251161	1
CG34347	chr3R:27195958-27196732	0.0158068	0.0013428	0.302838	0.780223	0.0251383	1
NTPase	chr2L:2880692-2881320	0.740313	0.00134536	0.58042	0.832264	0.0252133	1
NTPase	chr2L:2880706-2881320	0.736542	0.00135406	0.575996	0.831903	0.0252223	1
CG4133	chr2L:456797-456897	0.267299	0.0013551	0.420424	0.809951	0.0252595	1
Aldh	chr2L:9390246-9391787	0.00381086	0.00135944	0.045773	0.712201	0.0253102	1
Dscam	chr2R:3237879-3238002	0.269316	0.00136538	0.302107	0.809968	0.0253765	1
CG2767	chr3R:3831939-3832686	0.98968	0.00137318	0.346475	0.86457	0.0253845	1
TyrR	chr3L:22028103-22028665	0.410452	0.00137412	0.741931	0.810714	0.025385	1
TyrR	chr3L:22028069-22028665	0.410448	0.00137418	0.741928	0.810714	0.0253861	1
Pvf3	chr2L:7132724-7133763	0.581662	0.00137431	0.782737	0.815226	0.0254331	1
lola	chr2R:6414571-6414724	0.121907	0.00137988	0.128375	0.807353	0.0256027	1
CG4068	chrX:4830046-4830249	0.0113657	0.00140016	0.0281869	0.771081	0.0256029	1
Tif-IA	chr2L:22250433-22250483	0.116761	0.00140019	0.64627	0.807144	0.0256321	1
Ptp99A	chr3R:25309191-25311183	0.827851	0.00140372	0.457334	0.842272	0.0256668	1
Dyb	chr2R:8325267-8325395	0.166619	0.00140792	0.160624	0.808633	0.0256841	1
ine	chr2L:4474332-4475375	0.423853	0.00141002	0.829842	0.810759	0.0257171	1
CG30463	chr2R:12586479-12586643	0.39267	0.00141404	0.479796	0.81065	0.0257263	1
att-ORFA	chr3R:16383129-16383547	0.493188	0.00141516	0.287471	0.810954	0.0257938	1
Rab5	chr2L:2362870-2362938	0.365365	0.00142342	0.721693	0.810538	0.0257982	1
Ptp99A	chr3R:25287532-25288297	0.737028	0.00142396	0.432128	0.83195	0.0258036	1
shi	chrX:15786149-15786199	0.0236106	0.00142462	0.527998	0.788127	0.0258144	1
Dlic	chrX:11049067-11049261	0.0100727	0.00142596	0.900508	0.766975	0.0258884	1
Pvf3	chr2L:7132724-7133530	0.397511	0.00143508	0.475792	0.810668	0.0259141	1
l(2)gl	chr2L:18261-18583	0.616801	0.00143827	0.866393	0.819669	0.0259258	1
CG14945	chr2L:12049349-12051032	0.0187533	0.00143972	0.117148	0.78396	0.0259382	1
Picot	chr2R:12546252-12546658	0.00183416	0.00144127	0.00575814	0.63374	0.0259685	1
Ptp99A	chr3R:25287535-25288297	0.737813	0.00144505	0.433216	0.832025	0.0259814	1
Rtnl1	chr2L:5008181-5009748	0.14999	0.00144666	0.541867	0.808246	0.025982	1
Rtnl1	chr2L:5008181-5009744	0.14999	0.00144673	0.541866	0.808246	0.0259916	1
CG42351	chr2R:14644953-14645027	0.698557	0.00144794	0.571592	0.828416	0.0260131	1
Eip63E	chr3L:3516529-3516828	0.684058	0.00145063	0.0163196	0.827005	0.0260373	1
Vmat	chr2R:9404975-9405644	0.558339	0.00145366	0.363002	0.811999	0.0260587	1
wdb	chr3R:23406866-23407573	0.00761567	0.00145636	0.0153281	0.755566	0.0261124	1
Mitf	chr4:1223249-1223317	0.405448	0.00146315	0.272704	0.810697	0.026202	1
Tsp42Ee	chr2R:2899699-2899840	0.0976235	0.00147453	0.103411	0.806171	0.0262227	1
CtBP	chr3R:8837259-8837470	0.480373	0.00147718	0.231556	0.810922	0.026236	1
CG18490	chr3L:11208893-11208914	0.0776943	0.00147888	0.282064	0.804653	0.0262397	1
CG9153	chr3L:1313975-1314090	0.178814	0.00147935	0.170698	0.808871	0.0262585	1
Tif-IA	chr2L:22250372-22250483	0.138452	0.00148176	0.671435	0.807923	0.0262991	1
tow	chr3L:6937447-6937869	0.244452	0.00148698	0.467474	0.809747	0.0263203	1
CG18177	chr3L:9721085-9721533	0.704581	0.00148973	0.622168	0.828987	0.02637	1
CG13917	chr3L:1576679-1577131	0.514982	0.00149616	0.594708	0.811004	0.0263971	1
Caki	chr3R:17633321-17633456	0.421278	0.00149968	0.218919	0.810751	0.0264025	1
AGO2	chr3L:15552839-15553216	0.154623	0.00150038	0.866592	0.808362	0.0264609	1
dnc	chrX:3208033-3208641	0.702033	0.001508	0.554628	0.828746	0.0264764	1
cenB1A	chr3R:18944125-18944563	0.279194	0.00151004	0.319657	0.810045	0.0264775	1
att-ORFA	chr3R:16383129-16383420	0.535199	0.00151018	0.295364	0.811047	0.0264825	1
ed	chr2L:4113621-4114581	0.270699	0.00151085	0.522661	0.809979	0.0264986	1
alpha-Cat	chr3L:23311635-23311728	0.643421	0.00151295	0.226963	0.82274	0.0265253	1
Rab5	chr2L:2362675-2362919	0.321126	0.00151647	0.645074	0.810318	0.0265447	1
Ptp99A	chr3R:25309191-25310973	0.817792	0.00151902	0.468381	0.840641	0.0265895	1
gfA	chrX:19235879-19236073	0.129687	0.00152496	0.248519	0.807639	0.0266262	1
CG42354	chrX:15991736-15994382	0.425802	0.00152983	0.434758	0.810766	0.0266607	1
CG31211	chr3R:7776972-7777214	0.271476	0.00153443	0.0233483	0.809985	0.0266759	1
CG14741	chr3R:7900181-7900615	0.81657	0.00153647	0.791005	0.84048	0.0267419	1
shi	chrX:15786144-15786199	0.0212915	0.00154532	0.565489	0.786369	0.0267536	1
Mhcl	chr3R:11902836-11903063	0.114808	0.0015469	0.723277	0.807059	0.0267767	1
wol	chr2L:8301148-8301879	0.363187	0.00155001	0.776556	0.810529	0.0268011	1
CG9813	chr3R:9205296-9205489	0.132005	0.00155332	0.222816	0.807718	0.0268495	1
CG30428	chr2R:21141651-21142371	0.997141	0.00155988	0.609898	0.865447	0.0268667	1
CG30428	chr2R:21141651-21142382	0.996991	0.00156223	0.606123	0.86543	0.0268743	1
CtBP	chr3R:8837328-8837470	0.460098	0.00156326	0.221571	0.810868	0.0268842	1
CG8547	chr2R:10155204-10155692	0.00815263	0.00156461	0.215451	0.758613	0.0268932	1
wol	chr2L:8301345-8301879	0.366879	0.00156585	0.77745	0.810545	0.0269498	1
CG11299	chr2R:19615364-19615432	0.00775655	0.0015736	0.0249854	0.756403	0.0269616	1
CG18490	chr3L:11208893-11208910	0.0789358	0.00157523	0.240232	0.80477	0.0269873	1
CG1815	chr3R:27499428-27501889	0.369965	0.00157876	0.0931521	0.810558	0.0270338	1
rdgA	chrX:8894715-8896150	0.00988696	0.0015852	0.0473514	0.766301	0.0270433	1
CG18490	chr3L:11208879-11208910	0.0708412	0.00158652	0.245767	0.803936	0.0270625	1
inaC	chr2R:12786040-12786427	0.819237	0.00158918	0.712314	0.840878	0.0270696	1
Caki	chr3R:17634339-17634459	0.292625	0.00159018	0.457058	0.810141	0.0270749	1
cenB1A	chr3R:18944057-18944563	0.281589	0.00159091	0.32546	0.810062	0.0271165	1
CG8974	chrX:15689998-15690082	0.690519	0.00159671	0.482943	0.82764	0.0271631	1
ap	chr2R:1593707-1595611	0.639923	0.00160324	0.391415	0.82235	0.0271692	1
CG13185	chr2R:7765840-7765999	0.0558144	0.0016041	0.200906	0.801754	0.0271731	1
ap	chr2R:1593634-1595611	0.653503	0.00160464	0.392568	0.823843	0.0272159	1
Msp-300	chr2L:5139359-5139673	0.792691	0.00161068	0.0546834	0.83802	0.0272269	1
Cirl	chr2R:4502700-4502768	0.742194	0.00161224	0.0758468	0.832443	0.0273209	1
CG11455	chr2L:155494-155784	0.308065	0.00162558	0.419779	0.810241	0.0273214	1
Pfk	chr2R:5997456-5997558	0.45967	0.00162565	0.396688	0.810867	0.027359	1
Tsp42Ee	chr2R:2900538-2900621	0.938903	0.00163104	0.233348	0.858284	0.0273884	1
CtBP	chr3R:8837289-8837470	0.472532	0.00163526	0.219105	0.810902	0.0273919	1
sbb	chr2R:14244643-14244800	0.0464946	0.00163576	0.0585939	0.799704	0.027392	1
sbb	chr2R:14244643-14244801	0.0464954	0.00163577	0.0585952	0.799704	0.0274389	1
Caki	chr3R:17634339-17634446	0.305155	0.00164254	0.459735	0.810223	0.0274407	1
Tm1	chr3R:11126733-11126795	0.107706	0.00164279	0.00305289	0.806726	0.0274682	1
CG8866	chr3R:5158261-5158347	0.245535	0.00164678	0.55241	0.809758	0.0274715	1
CG12858	chr2R:10632703-10632862	0.3347	0.00164724	0.50416	0.810392	0.0275029	1
Pfk	chr2R:5997438-5997558	0.452701	0.00165182	0.476198	0.810847	0.0275179	1
CG12858	chr2R:10632703-10632881	0.334829	0.00165399	0.504852	0.810392	0.0275881	1
CG8455	chr2L:8200102-8200668	0.538386	0.00166426	0.942449	0.811053	0.027641	1
CG8079	chr2R:11109233-11109328	0.629286	0.00167204	0.572588	0.821139	0.0276613	1
CG31352	chr3R:5524773-5525083	0.90244	0.00167504	0.894173	0.853397	0.0276891	1
CG7272	chr3L:15496414-15496869	0.178001	0.00167915	0.622687	0.808857	0.0277124	1
vlc	chr2R:1589612-1589725	0.0964787	0.00168261	0.212271	0.8061	0.0277733	1
hppy	chr2R:15108249-15108287	0.608896	0.0016917	0.587064	0.81871	0.027786	1
Pdp1	chr3L:7823487-7823897	0.177809	0.00169359	0.173772	0.808853	0.0278102	1
para	chrX:16421310-16421530	0.363403	0.00169723	0.238758	0.81053	0.0278235	1
CG6330	chr3R:22783930-22784221	0.0213463	0.00169922	0.0339507	0.786415	0.0278363	1
CG10186	chr2L:19508950-19510137	0.200852	0.00170115	0.25564	0.809229	0.0278365	1
CG10186	chr2L:19508953-19510137	0.20085	0.00170117	0.255638	0.809229	0.0278365	1
CG10186	chr2L:19508949-19510137	0.200851	0.00170118	0.25564	0.809229	0.0278393	1
CG13917	chr3L:1587054-1587122	0.719628	0.0017016	0.914577	0.830374	0.0279009	1
CG4589	chr2R:20402537-20402586	0.0156335	0.0017109	0.829737	0.77996	0.0279019	1
vlc	chr2R:1589612-1589893	0.277493	0.00171106	0.0546824	0.810032	0.0279165	1
SCAP	chr2R:1922746-1924027	0.732719	0.00171327	0.375934	0.831537	0.0279254	1
gw	chr4:681129-681257	0.0502447	0.00171463	0.324787	0.800619	0.0279727	1
bbc	chr2R:9377247-9377378	0.900166	0.00172184	0.464616	0.853082	0.0279869	1
dac	chr2L:16483808-16484807	0.0175804	0.00172401	0.100971	0.782618	0.0280131	1
vlc	chr2R:1589612-1589721	0.0860072	0.00172802	0.155176	0.805371	0.0280131	1
CG6188	chr3R:8500299-8500585	0.177623	0.00172803	0.320456	0.80885	0.0280134	1
vlc	chr2R:1589610-1589721	0.0860114	0.00172807	0.155179	0.805371	0.0280183	1
CG6188	chr3R:8500207-8500585	0.177655	0.00172882	0.320597	0.80885	0.0280751	1
Lk6	chr3R:7585276-7585885	0.582451	0.00173757	0.858505	0.815331	0.0280767	1
CG7597	chr3L:21509413-21509754	0.283187	0.00173781	0.0524512	0.810074	0.0280794	1
Sin3A	chr2R:8462743-8464004	0.894019	0.00173823	0.278818	0.852221	0.0280873	1
para	chrX:16421310-16421582	0.36303	0.00173944	0.239986	0.810528	0.0280896	1
Sin3A	chr2R:8462683-8464004	0.89471	0.00173981	0.278896	0.852318	0.0280925	1
Syn2	chr2R:12442264-12442413	0.475946	0.00174026	0.865599	0.810911	0.0281065	1
Sin3A	chr2R:8462716-8464004	0.894671	0.00174242	0.279173	0.852312	0.0281457	1
CG11299	chr2R:19620085-19620706	0.591595	0.0017485	0.765019	0.816531	0.0281655	1
CG11299	chr2R:19620085-19620785	0.594518	0.00175159	0.768302	0.816907	0.0282873	1
Cyp9f2	chr3R:8231432-8231809	0.192647	0.00177071	0.181073	0.809105	0.0282892	1
Cyp9f2	chr3R:8231425-8231963	0.192658	0.00177102	0.181094	0.809106	0.0282895	1
CG13585	chr2R:20419396-20419901	0.394487	0.00177105	0.0965816	0.810657	0.0283227	1
Rdl	chr3L:9154364-9154540	0.751636	0.00177632	0.116415	0.833464	0.0283261	1
CtBP	chr3R:8837328-8837481	0.478592	0.00177685	0.208082	0.810917	0.0283395	1
CG13165	chr2R:8180621-8181105	0.113474	0.00177897	0.524601	0.807	0.0283395	1
CG6498	chr3L:15568654-15569460	0.325177	0.00177899	0.238645	0.810341	0.0283543	1
tai	chr2L:9177122-9177630	0.243852	0.00178134	0.0233729	0.809741	0.0283623	1
Aldh-III	chr2R:3362945-3363064	0.194768	0.00178262	0.00639286	0.809138	0.0283662	1
CG6498	chr3L:15568654-15569411	0.324647	0.00178323	0.238321	0.810338	0.0283759	1
Rgk2	chr2R:14433402-14433686	0.530352	0.00178478	0.377485	0.811037	0.0283788	1
Rgk2	chr2R:14433396-14433686	0.530345	0.00178523	0.377481	0.811037	0.0284324	1
CG8455	chr2L:8200346-8200652	0.550913	0.00179381	0.94301	0.811078	0.0284373	1
CG5515	chr3R:20014392-20014479	0.365107	0.00179461	0.541682	0.810537	0.0284476	1
Cirl	chr2R:4502544-4502748	0.672942	0.00179626	0.0681426	0.825885	0.0284521	1
CG30492	chr2R:3538574-3538713	0.0884001	0.00179698	0.78634	0.805553	0.028503	1
CG32016	chr4:972764-973087	0.0265496	0.0018052	0.041373	0.790645	0.028508	1
lt	chr2L:22817291-22817347	0.00713722	0.001806	0.0322338	0.752489	0.0285364	1
gfA	chrX:19223176-19223753	0.955107	0.0018106	0.340755	0.860353	0.0285548	1
CG8455	chr2L:8200351-8200652	0.551775	0.00181358	0.942184	0.811125	0.0285552	1
Dlic	chrX:11049082-11049261	0.0157426	0.00181366	0.929151	0.780126	0.0285967	1
LpR1	chr3R:21578523-21578717	0.00905911	0.00182042	0.00550137	0.76298	0.0286138	1
Cp1	chr2R:9853110-9853290	0.834723	0.00182322	0.676571	0.843367	0.0286149	1
gfA	chrX:19223380-19223753	0.923212	0.0018234	0.295836	0.856222	0.0286229	1
CG42321	chr2R:9311419-9311827	0.19862	0.00182471	0.725394	0.809196	0.0286314	1
toc	chr2L:3144339-3144676	0.988543	0.0018261	0.225193	0.864436	0.0286739	1
SKIP	chr3R:17999620-17999688	0.471365	0.00183215	0.167414	0.810899	0.0287399	1
trol	chrX:2417672-2417849	0.0217039	0.00184158	0.0425564	0.786708	0.0288082	1
CG32581	chrX:15693004-15693204	0.116397	0.00185139	0.542346	0.807128	0.0288794	1
CG11299	chr2R:19619560-19620661	0.604085	0.00186169	0.764984	0.818116	0.0288977	1
CG30492	chr2R:3524975-3525038	0.392174	0.00186434	0.887027	0.810648	0.0289121	1
ftz-f1	chr3L:18756429-18757902	0.0454319	0.00186643	0.0843054	0.799417	0.0289624	1
pyd	chr3R:4682773-4683383	0.00131515	0.00187376	0.0660019	0.584729	0.028972	1
CG30118	chr2R:14317820-14318390	0.980829	0.00187517	0.683	0.863515	0.0289794	1
Caki	chr3R:17633321-17633702	0.343516	0.00187625	0.38805	0.810437	0.0289982	1
CG42458	chr3L:7446760-7447738	0.701905	0.001879	0.333745	0.828734	0.0290225	1
CG7112	chr3L:8344027-8344479	0.567409	0.00188256	0.233094	0.813282	0.0290246	1
CG42458	chr3L:7446760-7447817	0.701843	0.00188287	0.33381	0.828728	0.0290251	1
CG42458	chr3L:7446760-7447804	0.701854	0.00188294	0.333815	0.828729	0.0290367	1
nAcRbeta-96A	chr3R:20337206-20337381	0.58766	0.00188466	0.107471	0.816019	0.0290514	1
tutl	chr2L:4319330-4323722	0.181655	0.00188682	0.855719	0.808922	0.0290546	1
tutl	chr2L:4319330-4323768	0.181642	0.00188729	0.855709	0.808922	0.0291615	1
CG7337	chr2L:1913209-1913663	0.827892	0.001903	0.18401	0.842279	0.0291729	1
nudE	chr3L:9893861-9894268	0.176142	0.00190468	0.46624	0.808822	0.0291841	1
CG3573	chrX:1816979-1817898	0.768154	0.00190634	0.634074	0.835349	0.029244	1
CG11505	chr3L:3225650-3226539	0.608207	0.00191522	0.234552	0.818626	0.0292605	1
CG13624	chr3R:20397013-20398316	0.891589	0.00191768	0.181982	0.851878	0.0292653	1
Aldh-III	chr2R:3361227-3361348	0.744091	0.00191839	0.75913	0.832623	0.0293009	1
CG13624	chr3R:20397013-20398216	0.896849	0.0019237	0.183423	0.852618	0.0293013	1
mtt	chr2R:4380726-4381845	0.795969	0.00192376	0.5217	0.838366	0.0293541	1
nudE	chr3L:9893861-9894118	0.172011	0.00193167	0.473114	0.808743	0.0293774	1
CG8671	chr2L:21281396-21281575	0.342871	0.00193517	0.111417	0.810433	0.0294113	1
Caki	chr3R:17633321-17633655	0.353425	0.00194028	0.389885	0.810484	0.0294382	1
CG5708	chr2L:10225874-10225965	0.226118	0.00194434	0.559913	0.809554	0.0294453	1
rtGEF	chr2L:20356876-20359233	0.0762319	0.00194541	0.118723	0.804511	0.0294477	1
CG8949	chrX:16962812-16964464	0.0649397	0.00194578	0.170445	0.803198	0.0294529	1
CG31689	chr2L:2730126-2730469	0.110535	0.00194656	0.536768	0.806864	0.0294925	1
simj	chr3L:10677685-10677753	0.183147	0.00195257	0.0679327	0.808949	0.0295645	1
spz	chr3R:22892844-22892921	0.251709	0.00196355	0.40449	0.809816	0.0295713	1
Pkn	chr2R:5155160-5155481	0.246269	0.00196459	0.293797	0.809765	0.0295823	1
Trx-2	chr2L:9615532-9616056	0.0619258	0.00196626	0.128971	0.802768	0.0295924	1
mura	chr3R:5377038-5377382	0.0703354	0.00196782	0.0278249	0.803877	0.0295938	1
mura	chr3R:5377038-5377368	0.0703387	0.00196803	0.0278261	0.803878	0.0296623	1
Dystrophin	chr3R:15331590-15331658	0.130145	0.00197834	0.324188	0.807655	0.0297547	1
CG1358	chr2R:3482779-3484333	0.627369	0.00199237	0.954309	0.820917	0.0297548	1
CG1358	chr2R:3482770-3484333	0.627369	0.00199239	0.95431	0.820917	0.0297578	1
sgg	chrX:2535158-2535394	0.229614	0.00199284	0.0405531	0.809593	0.0297588	1
CG11306	chr3L:21621293-21621491	0.943957	0.001993	0.141703	0.858936	0.0297966	1
pod1	chrX:6697883-6698210	0.862991	0.00199875	0.957157	0.847717	0.0298429	1
sgg	chrX:2535162-2535394	0.232281	0.00200585	0.0410565	0.809622	0.0298508	1
Atpalpha	chr3R:16792830-16792924	0.202033	0.00200706	0.505114	0.809246	0.0298598	1
Syt7	chr4:326686-326787	0.227418	0.00200844	0.276146	0.809568	0.0298725	1
CG12370	chr2R:8373765-8373815	0.466083	0.00201039	0.669574	0.810885	0.0299073	1
CG13624	chr3R:20385002-20386039	0.978924	0.00201575	0.569002	0.863286	0.0299112	1
CG11455	chr2L:155466-155784	0.311392	0.00201635	0.421189	0.810261	0.0300256	1
MRP	chr2L:12743980-12744881	0.520656	0.0020341	0.109985	0.811016	0.0300408	1
l(3)neo18	chr3L:12130571-12130878	0.825358	0.00203647	0.732306	0.841871	0.0300745	1
CG18659	chr2R:5012249-5012725	0.543618	0.00204174	0.0243972	0.811064	0.030075	1
Eip63E	chr3L:3515661-3516828	0.64311	0.00204182	0.0313318	0.822706	0.0301283	1
norpA	chrX:4249175-4249256	0.00768117	0.00205018	0.0612212	0.755959	0.0301489	1
CG5482	chr2R:14518638-14519135	0.247322	0.00205341	0.798166	0.809775	0.0301502	1
CG5482	chr2R:14518638-14519140	0.247321	0.00205363	0.798166	0.809775	0.0301792	1
CG8468	chr2R:10116918-10118131	0.28731	0.0020582	0.12649	0.810104	0.0301837	1
Smr	chrX:12624963-12625851	0.476766	0.00205891	0.446363	0.810913	0.0302169	1
MRP	chr2L:12743980-12744809	0.521029	0.00206417	0.110696	0.811017	0.030217	1
MRP	chr2L:12743980-12744835	0.52103	0.00206417	0.110696	0.811017	0.0302251	1
tow	chr3L:6937541-6939547	0.294463	0.00206546	0.469338	0.810153	0.0302266	1
CG5973	chr2L:7440020-7441756	0.577987	0.0020657	0.279338	0.814733	0.030283	1
Actn	chrX:1936080-1936344	0.147412	0.00207422	0.901489	0.808178	0.0303083	1
tow	chr3L:6937532-6939547	0.295274	0.00207805	0.47018	0.810159	0.0303119	1
Tsp42Ee	chr2R:2900538-2901154	0.972416	0.0020786	0.184121	0.862497	0.0304843	1
SNF4Agamma	chr3R:17024844-17025485	0.080139	0.00210493	0.250542	0.804879	0.0304914	1
CG8468	chr2R:10116918-10118172	0.255653	0.00210602	0.0993515	0.809852	0.030529	1
Tab2	chr2R:15185748-15186135	0.0231187	0.00211182	0.0345238	0.787783	0.0305445	1
prel	chr2R:5312752-5313612	0.290145	0.00211421	0.701449	0.810124	0.0305446	1
prel	chr2R:5312752-5313659	0.290147	0.00211422	0.701448	0.810124	0.0305858	1
Rim	chr3R:13701542-13701669	0.00239257	0.00212061	0.130225	0.666793	0.0306108	1
CG40498	chr2RHet:76585-76660	0.763298	0.00212449	0.700981	0.834802	0.0306458	1
CR41510	chr2RHet:76585-76660	0.763298	0.00212449	0.700981	0.834802	0.0306458	1
Atpalpha	chr3R:16792747-16792815	0.190399	0.00212992	0.490042	0.80907	0.0306557	1
CG34363	chr2R:6210486-6211573	0.889932	0.00213147	0.161646	0.851643	0.0306788	1
gw	chr4:681055-681475	0.103453	0.00213509	0.25824	0.806505	0.0306912	1
Ptp99A	chr3R:25245030-25245156	0.0716854	0.00213702	0.173384	0.804031	0.0307049	1
tow	chr3L:6937560-6939547	0.296771	0.00213917	0.460497	0.810169	0.0307078	1
RN-tre	chr2R:9873834-9874976	0.901775	0.00213961	0.936938	0.853305	0.0307099	1
GlcAT-S	chr2L:9616838-9617840	0.840415	0.00213994	0.97939	0.844263	0.0307182	1
slim	chr2R:14328943-14329818	0.135904	0.00214124	0.656021	0.807844	0.0307502	1
CG11455	chr2L:155333-155784	0.312584	0.00214627	0.416884	0.810268	0.0307555	1
Ac3	chr2L:21639241-21639503	0.30521	0.0021471	0.0755705	0.810223	0.0308219	1
CG5001	chr2L:1185723-1186452	0.889321	0.00215729	0.32369	0.851556	0.0309894	1
CG34347	chr3R:27192565-27193244	0.508332	0.00218323	0.578976	0.810989	0.031063	1
CG31689	chr2L:2730072-2730469	0.109063	0.00219474	0.550877	0.806793	0.0310939	1
CG9153	chr3L:1313802-1313908	0.338284	0.00219959	0.395009	0.81041	0.0311219	1
Dystrophin	chr3R:15319687-15319850	0.6439	0.002204	0.656192	0.822793	0.0311752	1
Zasp52	chr2R:11651151-11651334	0.2275	0.0022124	0.361292	0.809569	0.0311864	1
CG34363	chr2R:6210480-6211573	0.891274	0.00221419	0.162086	0.851833	0.0312242	1
CG7378	chrX:18794436-18794600	0.829158	0.00222017	0.662809	0.842482	0.0312435	1
Ptp99A	chr3R:25310169-25312853	0.826936	0.00222324	0.359137	0.842125	0.0312447	1
CG7378	chrX:18794425-18794600	0.830094	0.00222343	0.662246	0.842631	0.0312706	1
msn	chr3L:2586403-2586792	0.644818	0.00222755	0.148427	0.822895	0.0312845	1
Ac3	chr2L:21639241-21639894	0.234427	0.00222977	0.146635	0.809645	0.0313002	1
Ptp99A	chr3R:25310174-25312906	0.828006	0.00223228	0.359878	0.842297	0.0313065	1
CG9153	chr3L:1313668-1313908	0.335729	0.00223329	0.395562	0.810397	0.0313107	1
Ptp99A	chr3R:25310174-25312853	0.828342	0.00223396	0.359854	0.842351	0.0313724	1
Nrx-IV	chr3L:12144311-12144507	0.197331	0.00224385	0.09843	0.809177	0.031381	1
Ark	chr2R:12911203-12912796	0.990463	0.00224522	0.665233	0.864663	0.0313891	1
gw	chr4:681055-681425	0.0985046	0.00224652	0.260831	0.806224	0.0314393	1
rhea	chr3L:8555245-8555436	0.0530456	0.00225462	0.752814	0.801219	0.0314468	1
CG3573	chrX:1817180-1817898	0.748471	0.00225583	0.636873	0.833094	0.0315549	1
Smr	chrX:12624963-12625937	0.477526	0.00227337	0.401332	0.810915	0.0315651	1
CG31211	chr3R:7777445-7777547	0.0252376	0.00227504	0.0052957	0.789577	0.0315662	1
CtBP	chr3R:8837328-8837593	0.394414	0.00227523	0.305759	0.810656	0.0315858	1
mnd	chr3L:14980682-14980949	0.00741709	0.00227842	0.254397	0.754334	0.0316009	1
Aldh-III	chr2R:3356865-3357018	0.379895	0.00228089	0.173111	0.8106	0.0316305	1
CG3689	chr3L:9406491-9406984	0.32077	0.00228575	0.225419	0.810316	0.0316516	1
Ptp99A	chr3R:25297373-25297576	0.897056	0.00228921	0.632826	0.852647	0.0316646	1
mbl	chr2R:13261323-13266488	0.0229476	0.00229135	0.815617	0.78766	0.0317047	1
mnd	chr3L:14980682-14981349	0.00754358	0.00229795	0.249046	0.755126	0.0317224	1
Tina-1	chr2R:20828645-20828964	0.0561515	0.00230087	0.0345014	0.801816	0.0317815	1
n-syb	chr3L:1635937-1636009	0.598944	0.00231065	0.398946	0.81747	0.031812	1
mnd	chr3L:14980426-14981349	0.00724029	0.00231573	0.246297	0.753184	0.0318221	1
Dif	chr2L:17420066-17420134	0.732559	0.00231741	0.641816	0.831523	0.0318227	1
Dif	chr2L:17420066-17420130	0.732577	0.00231751	0.641818	0.831525	0.0318493	1
msn	chr3L:2586403-2586656	0.659463	0.00232195	0.155607	0.824481	0.0318509	1
CG5973	chr2L:7444927-7445378	0.0351999	0.00232221	0.51698	0.795793	0.0318627	1
mnd	chr3L:14980512-14980949	0.00722429	0.00232419	0.254731	0.753078	0.0318757	1
AnnIX	chr3R:16896446-16896639	0.364327	0.00232635	0.15713	0.810534	0.0319001	1
CG10462	chr2L:19732573-19732670	0.023706	0.00233045	0.186344	0.788192	0.0319122	1
CG30190	chr2R:18814773-18814970	0.227502	0.00233247	0.560878	0.809569	0.0319457	1
CG30193	chr2R:18814773-18814970	0.227502	0.00233247	0.560878	0.809569	0.0319457	1
CG14351	chr2L:1606390-1606697	0.713894	0.00233811	0.272874	0.829851	0.0319464	1
CG5284	chr3L:16087088-16087648	0.761992	0.00233822	0.46963	0.834654	0.0319547	1
dnc	chrX:3208184-3208641	0.665608	0.00233962	0.468165	0.825128	0.0320018	1
pnt	chr3R:19138609-19138812	0.203696	0.00234756	0.166126	0.80927	0.0320244	1
Rbp9	chr2L:2962272-2962286	0.122365	0.00235139	0.247788	0.807371	0.0320395	1
sbb	chr2R:14244643-14244960	0.0530757	0.00235395	0.0654188	0.801226	0.0320449	1
Lk6	chr3R:7585276-7585828	0.597657	0.00235486	0.869329	0.817307	0.0320817	1
CG3689	chr3L:9406491-9407006	0.318815	0.0023611	0.226796	0.810305	0.0321558	1
CG32016	chr4:977171-978515	0.429964	0.00237376	0.187746	0.810779	0.0321697	1
Gpdh	chr2L:5948407-5949092	0.735743	0.00237614	0.218987	0.831826	0.032188	1
CG7272	chr3L:15496408-15496869	0.224283	0.00237927	0.623926	0.809532	0.0322059	1
Plip	chr3R:19584712-19585017	0.00942427	0.00238235	0.0513252	0.764513	0.0322381	1
Caki	chr3R:17629406-17630897	0.906691	0.00238789	0.618887	0.853985	0.0322578	1
CG4589	chr2R:20396965-20397962	0.568978	0.00239128	0.816378	0.813501	0.032289	1
CG1358	chr2R:3483240-3484333	0.646324	0.00239668	0.958971	0.823061	0.0322931	1
Epac	chr2R:2684411-2684917	0.630091	0.00239738	0.420608	0.821232	0.032317	1
CG32225	chr3L:20299167-20299573	0.425622	0.00240152	0.0178045	0.810765	0.0323328	1
Dyb	chr2R:8325012-8325080	0.0645441	0.00240427	0.00233814	0.803144	0.0323475	1
CG12090	chr3L:1533857-1534034	0.0296295	0.00240682	0.44023	0.792792	0.0323631	1
eIF5	chrX:15885116-15885415	0.914747	0.00240954	0.170723	0.855084	0.0323826	1
Caki	chr3R:17644594-17644671	0.371615	0.00241294	0.308471	0.810565	0.0323891	1
tow	chr3L:6937613-6937869	0.345411	0.00241407	0.499202	0.810446	0.0324099	1
GluClalpha	chr3R:15589971-15591353	0.233082	0.0024177	0.227693	0.809631	0.0324288	1
Sug	chr3L:11680723-11681190	0.0318701	0.00242101	0.00390696	0.794123	0.0324667	1
GlcAT-S	chr2L:9616722-9617609	0.886067	0.00242766	0.983414	0.851092	0.0324739	1
CG31352	chr3R:5530667-5531220	0.50556	0.00242892	0.567451	0.810983	0.0325255	1
CG3655	chrX:982705-982798	0.674963	0.002438	0.71586	0.826091	0.0325308	1
CG4589	chr2R:20397285-20397962	0.547595	0.00243893	0.83203	0.811072	0.0325425	1
RhoGAP18B	chrX:19059253-19059373	0.23081	0.002441	0.40722	0.809606	0.0325477	1
CG4589	chr2R:20397287-20397962	0.547753	0.00244193	0.831778	0.811072	0.0325539	1
rab3-GEF	chrX:14988700-14989061	0.704896	0.00244303	0.116678	0.829016	0.032574	1
CG9328	chr2L:20798703-20798771	0.784084	0.00244658	0.257641	0.8371	0.0326082	1
unc79	chr3R:15057698-15058416	0.693226	0.00245263	0.280527	0.827904	0.0326223	1
Plip	chr3R:19584700-19585017	0.0104652	0.00245513	0.0507523	0.768324	0.0326625	1
bves	chrX:20951074-20951106	0.399493	0.00246225	0.0437047	0.810675	0.0327791	1
CG13185	chr2R:7763969-7765785	0.171983	0.00248308	0.409578	0.808742	0.0327872	1
GlyP	chr2L:2136731-2137296	0.0936008	0.00248453	0.132354	0.805916	0.032858	1
CG15072	chr2R:14576178-14576246	0.211137	0.00249729	0.117271	0.809371	0.0328636	1
hoe1	chr2L:4923170-4923238	0.325411	0.00249829	0.0774726	0.810342	0.0329079	1
CG7272	chr3L:15496408-15496874	0.212571	0.00250631	0.641913	0.809389	0.0329165	1
S6k	chr3L:5803390-5804057	0.645854	0.00250787	0.777415	0.823009	0.0329322	1
ced-6	chr2R:5328207-5328360	0.897478	0.00251072	0.251929	0.852706	0.0329373	1
Stat92E	chr3R:16376443-16376852	0.0516417	0.00251165	0.0156013	0.800927	0.0329772	1
CG32529	chrX:19761131-19761199	0.0916082	0.00251893	0.458323	0.805782	0.0329794	1
tai	chr2L:9177125-9177630	0.312879	0.00251932	0.0294716	0.81027	0.0330595	1
CG34400	chr3L:13894785-13896317	0.530065	0.00253399	0.204282	0.811036	0.0330596	1
CG34400	chr3L:13894785-13896328	0.53007	0.002534	0.204282	0.811036	0.0330854	1
GlyP	chr2L:2136731-2137303	0.0956855	0.00253876	0.131236	0.806051	0.0330867	1
CG17494	chr2L:22472553-22473865	0.448381	0.00253899	0.33215	0.810835	0.0330993	1
CkIIbeta	chrX:11686914-11687312	0.288786	0.00254132	0.424737	0.810114	0.0331049	1
Stat92E	chr3R:16376443-16376862	0.051694	0.00254235	0.0158057	0.800938	0.0331211	1
CtBP	chr3R:8837328-8837597	0.394476	0.00254534	0.325152	0.810657	0.0331218	1
PhKgamma	chrX:11592533-11592630	0.292057	0.00254547	0.0707464	0.810137	0.0331257	1
CG34363	chr2R:6210409-6211573	0.897766	0.0025462	0.159419	0.852747	0.0331369	1
CG34383	chr3R:9582612-9582749	0.0768102	0.00254826	0.128056	0.804568	0.0331924	1
Syn2	chr2R:12442133-12442413	0.578172	0.00255855	0.878911	0.814758	0.0332101	1
CG42256	chr3L:7157450-7157613	0.177666	0.00256185	0.378527	0.80885	0.033225	1
pod1	chrX:6697701-6697799	0.98393	0.00256462	0.0786454	0.863887	0.0332252	1
pod1	chrX:6697704-6697799	0.98393	0.00256466	0.0786459	0.863887	0.0332482	1
CG32016	chr4:977171-978339	0.460082	0.00256894	0.196655	0.810868	0.0332564	1
CkIIbeta	chrX:11686869-11687312	0.28025	0.00257047	0.399627	0.810052	0.0332633	1
CG17494	chr2L:22472426-22473865	0.453197	0.00257176	0.333197	0.810849	0.0333718	1
CG33298	chr2L:9519394-9519534	0.754155	0.00258741	0.682249	0.833756	0.0335386	1
Dystrophin	chr3R:15313981-15314113	0.920135	0.00261163	0.624616	0.85581	0.0335935	1
Dscam	chr2R:3232566-3232856	0.46621	0.00261965	0.846474	0.810885	0.0336581	1
Ptp99A	chr3R:25297373-25297621	0.905254	0.00262912	0.633025	0.853787	0.0337016	1
CG11299	chr2R:19620085-19621917	0.578483	0.00263551	0.853724	0.8148	0.0337154	1
l(3)neo18	chr3L:12130593-12130878	0.809809	0.00263753	0.700997	0.839797	0.0337377	1
CG2246	chr3R:26421112-26421343	0.00180893	0.00264082	0.0361515	0.631868	0.0337639	1
Dif	chr2L:17420066-17420113	0.754689	0.00264468	0.622701	0.833818	0.0337675	1
CG5130	chr3L:20486342-20486585	0.79762	0.00264522	0.159476	0.838539	0.0337739	1
bves	chrX:20951074-20951142	0.407391	0.00264617	0.0482376	0.810704	0.0337764	1
CG11299	chr2R:19620085-19621608	0.574488	0.00264653	0.84969	0.814259	0.0338133	1
CG34123	chr2R:11162799-11162991	0.428856	0.00265199	0.148679	0.810776	0.0338599	1
Atet	chr2L:4333810-4334439	0.691294	0.0026589	0.495364	0.827716	0.0339008	1
Aldh-III	chr2R:3356865-3357062	0.367964	0.00266496	0.188711	0.81055	0.0340245	1
bves	chrX:20925459-20925769	0.809012	0.0026834	0.43661	0.839715	0.0340533	1
CG33144	chr2R:6627901-6628691	0.650478	0.00268772	0.142445	0.823516	0.0341022	1
baf	chr2L:8029816-8030336	0.662255	0.00269506	0.641308	0.824776	0.0341583	1
Art4	chr3R:5811200-5811956	0.106791	0.00270351	0.0516612	0.80668	0.0342668	1
hoe1	chr2L:4928198-4928412	0.286188	0.0027199	0.142689	0.810096	0.0342704	1
CG33144	chr2R:6627898-6628691	0.652504	0.00272045	0.14443	0.823735	0.0342898	1
bves	chrX:20925554-20925769	0.807257	0.00272338	0.439915	0.839536	0.0342914	1
baf	chr2L:8029816-8030589	0.662637	0.00272363	0.641435	0.824816	0.0343048	1
alph	chr3R:25423886-25424584	0.377244	0.00272566	0.794186	0.810589	0.0343282	1
bves	chrX:20925506-20925769	0.807515	0.00272922	0.43845	0.839563	0.0344544	1
bves	chrX:20925544-20925769	0.810571	0.00274847	0.440381	0.839874	0.034457	1
bves	chrX:20925534-20925769	0.809336	0.00274887	0.441574	0.839748	0.0344696	1
RhoGAP1A	chrX:23840-23982	0.0439049	0.00275079	0.0147121	0.798982	0.0345244	1
PGRP-LA	chr3L:9328789-9328857	0.245533	0.00275921	0.579107	0.809758	0.0345557	1
rtGEF	chr2L:20350375-20350894	0.0553151	0.00276401	0.359126	0.801662	0.0345557	1
rtGEF	chr2L:20350428-20350894	0.0553153	0.00276402	0.359126	0.801662	0.0345558	1
rtGEF	chr2L:20350394-20350894	0.0553151	0.00276403	0.359126	0.801662	0.0345558	1
rtGEF	chr2L:20350411-20350894	0.0553153	0.00276403	0.359126	0.801662	0.034728	1
pgant5	chr2L:5092875-5092898	0.0170684	0.00279065	0.495906	0.781977	0.0347929	1
form3	chr3L:7104164-7104567	0.243093	0.00280076	0.862044	0.809734	0.0348378	1
spz	chr3R:22891821-22892081	0.153015	0.00280776	0.143348	0.808322	0.0348623	1
trol	chrX:2417438-2417601	0.0819378	0.0028116	0.31053	0.805037	0.0348989	1
tinc	chr3R:13695506-13698239	0.913783	0.00281733	0.26305	0.854953	0.034922	1
pnt	chr3R:19165904-19166249	0.463616	0.00282094	0.828124	0.810878	0.0349759	1
CG1416	chr2L:21758002-21758099	0.401637	0.00282943	0.218657	0.810683	0.034994	1
CG2225	chr2L:21677499-21677566	0.0508059	0.00283228	0.740936	0.800745	0.0350368	1
Rpn5	chr3R:1615400-1615432	0.281324	0.00283902	0.535526	0.81006	0.0350545	1
CG32225	chr3L:20299167-20299507	0.546205	0.00284181	0.0183865	0.811069	0.0351101	1
dmondo	chr2L:21297946-21298014	0.629845	0.00285062	0.616375	0.821203	0.0351131	1
Got1	chr2R:12028139-12029440	0.0189191	0.0028511	0.145187	0.784137	0.0351133	1
Got1	chr2R:12028139-12029445	0.0189199	0.00285114	0.145189	0.784138	0.0351236	1
tinc	chr3R:13695648-13698239	0.924279	0.00285276	0.253352	0.856364	0.0352175	1
hoe1	chr2L:4928228-4928412	0.370265	0.0028677	0.198556	0.81056	0.0352782	1
vlc	chr2R:1589738-1589806	0.487372	0.0028774	0.122782	0.810939	0.0353259	1
CG9044	chr2L:5949835-5949990	0.493577	0.00288505	0.660165	0.810955	0.0353759	1
CG31660	chr2L:4874887-4876300	0.860108	0.00289308	0.197717	0.847284	0.0353935	1
Ih	chr2R:10175662-10175760	0.459334	0.00289591	0.763512	0.810866	0.0354128	1
CG14741	chr3R:7899926-7900612	0.878553	0.00289902	0.409218	0.850009	0.0354635	1
CG32391	chr3L:7062151-7062297	0.673289	0.00290721	0.547324	0.825921	0.0354765	1
CG11486	chr3L:3083134-3083202	0.153264	0.0029093	0.172673	0.808329	0.0354945	1
nrv2	chr2L:6793228-6793404	0.012046	0.00291222	0.750533	0.772901	0.03552	1
gw	chr4:680595-680696	0.168207	0.00291635	0.174298	0.808666	0.0355535	1
Nedd4	chr3L:17535690-17535912	0.291428	0.00292179	0.127066	0.810132	0.0355837	1
CG31145	chr3R:19432458-19432771	0.627808	0.0029267	0.56679	0.820968	0.0356464	1
CG15134	chr2L:16905491-16905594	0.426472	0.00293691	0.268619	0.810768	0.0356464	1
CG12370	chr2R:8373419-8373543	0.56202	0.00293691	0.213376	0.812524	0.0356482	1
CG1969	chr3R:25565167-25565701	0.056785	0.00293721	0.203036	0.80193	0.0356508	1
larp	chr3R:24161730-24162400	0.288852	0.00293764	0.793759	0.810115	0.0356715	1
tacc	chr3R:563195-563644	0.650102	0.00294102	0.196202	0.823475	0.0356889	1
bbc	chr2R:9376422-9376553	0.849492	0.00294386	0.584206	0.84567	0.035715	1
hoe1	chr2L:4928194-4928412	0.240446	0.00294814	0.116398	0.809707	0.0357265	1
CG9153	chr3L:1313802-1314090	0.329098	0.00295002	0.420256	0.810362	0.0357387	1
CG2246	chr3R:26421112-26421348	0.00191572	0.00295203	0.0360259	0.639522	0.0357485	1
stai	chr2L:6122698-6122853	0.401287	0.00295363	0.74035	0.810682	0.0357729	1
Dscam	chr2R:3247587-3247710	0.116668	0.00295764	0.558538	0.80714	0.0358473	1
CG9153	chr3L:1313668-1314090	0.326188	0.0029699	0.420512	0.810346	0.0358797	1
CG13293	chr3L:6081055-6081177	0.69223	0.00297525	0.85842	0.827807	0.0359242	1
Pect	chr2L:13208421-13208487	0.807379	0.00298262	0.0559856	0.839549	0.0359456	1
rhea	chr3L:8555496-8555574	0.184574	0.00298617	0.605263	0.808973	0.0359466	1
CG33205	chr3L:9813380-9813659	0.324954	0.00298634	0.19113	0.810339	0.0359625	1
Sema-1a	chr2L:8655703-8655824	0.642865	0.00298899	0.150792	0.822678	0.0360442	1
CG18177	chr3L:9721313-9721533	0.482345	0.00300258	0.872691	0.810927	0.0361662	1
trol	chrX:2417438-2417562	0.12437	0.00302302	0.278836	0.807448	0.0362013	1
CG14741	chr3R:7899926-7900615	0.873821	0.00302893	0.412211	0.84932	0.0362365	1
Csk	chr3R:7461191-7461301	0.0654829	0.00303486	0.101551	0.803271	0.0362843	1
cnn	chr2R:9333052-9333095	0.311649	0.00304294	0.836077	0.810263	0.036317	1
Oda	chr2R:8053368-8055432	0.0245861	0.00304847	0.106881	0.789006	0.0363493	1
Oda	chr2R:8053976-8055432	0.0238527	0.00305396	0.106235	0.788326	0.0363572	1
Oda	chr2R:8053770-8055432	0.0239401	0.0030553	0.106421	0.788409	0.0363585	1
pr	chr2L:20075384-20075560	0.0110532	0.00305552	0.281147	0.770173	0.0363681	1
Oda	chr2R:8053938-8055432	0.0238633	0.00305714	0.10665	0.788336	0.0363848	1
CG4351	chrX:12995941-12995964	0.288116	0.00305998	0.0367896	0.810109	0.036399	1
CG1815	chr3R:27499428-27501103	0.298181	0.00306241	0.0801232	0.810178	0.0364677	1
E(bx)	chr3L:239243-240116	0.857232	0.00307412	0.139763	0.84685	0.0364794	1
CG3655	chrX:1013718-1013818	0.541947	0.00307612	0.480749	0.811061	0.0366175	1
CG7149	chr2L:7790022-7790557	0.652381	0.00309983	0.495629	0.823722	0.0366323	1
Sulf1	chr3R:12156642-12156678	0.154223	0.00310239	0.206524	0.808352	0.0366589	1
CG42324	chr3L:3507298-3509263	0.0642388	0.00310699	0.512682	0.803102	0.0366626	1
TM4SF	chr2R:19765944-19767335	0.456121	0.00310761	0.953817	0.810857	0.0366701	1
CG4747	chr2L:10007414-10007503	0.522125	0.00310892	0.684631	0.811019	0.0366854	1
cac	chrX:11842661-11842869	0.0344813	0.00311156	0.381228	0.795459	0.0367226	1
CG42330	chr3L:8234231-8234294	0.46566	0.00311801	0.904603	0.810883	0.0367227	1
Sema-2a	chr2R:12404326-12404846	0.28683	0.00311803	0.660752	0.8101	0.0367227	1
CG9044	chr2L:5949828-5949990	0.546303	0.00311803	0.645044	0.811069	0.0367876	1
CG31665	chr2L:1855364-1855797	0.257581	0.00312931	0.993203	0.809869	0.0368063	1
Trx-2	chr2L:9615532-9616330	0.050766	0.00313256	0.0793446	0.800736	0.0368129	1
Aldh	chr2L:9389681-9389749	0.485526	0.00313371	0.935047	0.810935	0.0368371	1
CG7149	chr2L:7790022-7790692	0.659956	0.00313793	0.499035	0.824533	0.0368412	1
CG18769	chr3L:6543839-6543969	0.81579	0.00313865	0.137507	0.840402	0.0368414	1
CG18769	chr3L:6543824-6543969	0.815798	0.00313867	0.137503	0.840402	0.0368415	1
CG18769	chr3L:6543821-6543969	0.815797	0.0031387	0.137505	0.840402	0.0368641	1
CG4853	chr2R:13403090-13403827	0.148667	0.00314265	0.313106	0.808211	0.0368894	1
MRP	chr2L:12738241-12738747	0.307591	0.00314707	0.870929	0.810238	0.0369455	1
CG42256	chr3L:7159763-7160263	0.0853225	0.00315691	0.104518	0.805317	0.036955	1
smaug	chr3L:8984322-8984637	0.701218	0.00315857	0.29926	0.828669	0.0369602	1
CG7149	chr2L:7790022-7790703	0.660319	0.0031595	0.499779	0.824572	0.036982	1
ine	chr2L:4476842-4477024	0.128961	0.00316332	0.212544	0.807614	0.0369892	1
CG42256	chr3L:7159763-7160248	0.0849048	0.00316459	0.104684	0.805284	0.0370282	1
tai	chr2L:9166800-9167438	0.557777	0.00317144	0.00354713	0.811918	0.0370498	1
ine	chr2L:4476842-4477102	0.12912	0.00317522	0.212117	0.807619	0.0371162	1
mbf1	chr3L:16567593-16567852	0.247108	0.00318602	0.716149	0.809773	0.0371939	1
Nedd4	chr3L:17535651-17535912	0.235697	0.00319869	0.135757	0.809659	0.0372063	1
gw	chr4:681129-681236	0.0628324	0.00320071	0.420132	0.802901	0.0372148	1
Dystrophin	chr3R:15334982-15335112	0.137212	0.00320211	0.0631371	0.807885	0.037396	1
stan	chr2R:6593380-6595526	0.0701022	0.00323186	0.118041	0.80385	0.037442	1
bip2	chr4:480349-480767	0.353565	0.00323947	0.680781	0.810485	0.0374623	1
AP-1gamma	chrX:9004855-9005038	0.0870871	0.00324281	0.104856	0.805454	0.0374693	1
Mapmodulin	chr2R:13755288-13755593	0.405963	0.00324398	0.18188	0.810699	0.0374716	1
slo	chr3R:20532995-20534018	0.0173755	0.00324436	0.381988	0.782366	0.0375594	1
CG42324	chr3L:3507298-3509251	0.0641672	0.00325892	0.52041	0.803092	0.0375618	1
CG8909	chrX:15813774-15814742	0.549632	0.00325933	0.054053	0.811076	0.0376693	1
kek4	chr2L:13212335-13212943	0.0451035	0.00327725	0.294805	0.799326	0.0376728	1
CG2767	chr3R:3833618-3833881	0.741808	0.00327783	0.35337	0.832407	0.037679	1
CG42330	chr3L:8234226-8234294	0.475539	0.00327887	0.903183	0.81091	0.037684	1
CG31660	chr2L:4874887-4876452	0.933	0.00327971	0.17221	0.857515	0.0377293	1
Hn	chr3L:7754663-7755335	0.719372	0.00328729	0.746718	0.83035	0.0378085	1
CG10508	chr3L:21207712-21208212	0.419995	0.00330059	0.0796823	0.810747	0.0378381	1
kek4	chr2L:13212327-13212943	0.0453258	0.00330558	0.29733	0.799388	0.0378682	1
CG31660	chr2L:4874887-4876433	0.879908	0.00331067	0.191215	0.850206	0.0378896	1
Sug	chr3L:11679825-11681190	0.0399746	0.00331428	0.00538584	0.797711	0.0379295	1
CG13293	chr3L:6081043-6081177	0.736619	0.00332103	0.83291	0.83191	0.0379399	1
CG13624	chr3R:20383508-20386039	0.984035	0.00332278	0.512952	0.863899	0.0380062	1
MRP	chr2L:12729931-12730151	0.739741	0.00333403	0.522858	0.83221	0.038026	1
CG2767	chr3R:3833618-3833890	0.738304	0.0033374	0.359351	0.832072	0.0380575	1
stan	chr2R:6593813-6595526	0.0757896	0.00334276	0.130876	0.804466	0.0380743	1
CG42330	chr3L:8233941-8234294	0.478722	0.00334563	0.900515	0.810918	0.0381016	1
CG8468	chr2R:10107350-10108270	0.167625	0.00335029	0.124218	0.808654	0.0381451	1
capu	chr2L:3888649-3888838	0.00544566	0.00335773	0.208706	0.73764	0.0381894	1
AnnIX	chr3R:16896446-16896707	0.397631	0.00336532	0.259923	0.810668	0.0382049	1
Tsp42Ee	chr2R:2900384-2900452	0.160269	0.00336798	0.129026	0.808495	0.0382078	1
E(bx)	chr3L:239243-240113	0.847434	0.00336848	0.153498	0.845353	0.0382892	1
Chro	chr3L:22871734-22871864	0.18197	0.00338248	0.115861	0.808928	0.0383238	1
msn	chr3L:2586403-2586598	0.796733	0.00338844	0.218749	0.838446	0.0383327	1
Dscam3	chr3R:13300511-13300727	0.473339	0.00338998	0.927822	0.810904	0.038371	1
CG3689	chr3L:9404140-9404521	0.00694302	0.00339661	0.124015	0.751128	0.0383796	1
lig	chr2R:3963365-3963717	0.0845919	0.0033981	0.473994	0.805258	0.0383805	1
ERR	chr3L:8179279-8179847	0.184925	0.00339825	0.801195	0.808979	0.0383914	1
DMG6-X.31.010	chrX:17954179-17954581	0.887453	0.00340013	0.929444	0.85129	0.0384487	1
CG4853	chr2R:13403105-13403827	0.166929	0.00341008	0.313785	0.80864	0.0384753	1
Spt-I	chr2R:9056320-9056393	0.112494	0.00341471	0.202033	0.806955	0.0385196	1
Src64B	chr3L:4625763-4626235	0.0281971	0.00342242	0.0413553	0.791849	0.0385808	1
Chro	chr3L:22871734-22872151	0.179197	0.00343311	0.119658	0.808878	0.0385851	1
slo	chr3R:20532995-20534726	0.000404071	0.00343385	0.703394	0.403802	0.0385853	1
Chit	chr2R:12579203-12579404	0.850243	0.00343389	0.503463	0.845785	0.0385944	1
trol	chrX:2390494-2390626	0.197052	0.00343548	0.0895534	0.809173	0.0386995	1
CG2225	chr2L:21677499-21677530	0.0421779	0.00345392	0.813233	0.798452	0.0387061	1
cnn	chr2R:9331680-9331847	0.0941097	0.00345508	0.492422	0.805949	0.0387119	1
sei	chr2R:19934912-19935071	0.184184	0.00345611	0.477397	0.808966	0.0387246	1
CG8234	chr2R:7563688-7563842	0.771513	0.00345835	0.741889	0.835724	0.0388266	1
CG10089	chr3L:13458719-13459988	0.730527	0.00347431	0.33826	0.831345	0.0388354	1
AP-1gamma	chrX:9004651-9005038	0.0697774	0.00348651	0.118704	0.803812	0.0389248	1
mura	chr3R:5377038-5377079	0.0863175	0.00348974	0.0537895	0.805395	0.0390305	1
CR42549	chr3R:5377038-5377079	0.0863175	0.00348974	0.0537895	0.805395	0.0390305	1
Slob	chr2L:7659192-7659521	0.0200786	0.00350642	0.01841	0.785292	0.0390342	1
Dscam	chr2R:3214122-3214289	0.0202781	0.00350701	0.0336108	0.785478	0.0390541	1
CG17698	chr3L:23739290-23739644	0.130864	0.00351016	0.44584	0.807679	0.0390775	1
tim	chr2L:3503251-3504299	0.1058	0.00351386	0.0295991	0.806629	0.039175	1
for	chr2L:3638939-3639920	0.00447412	0.00352932	0.00397076	0.72454	0.0392056	1
faf	chr3R:27613524-27614105	0.224185	0.0035342	0.411776	0.809531	0.0392431	1
vlc	chr2R:1589914-1590452	0.382981	0.00354017	0.403287	0.810612	0.0392937	1
Tm1	chr3R:11133312-11133811	0.491723	0.00354825	0.0430318	0.81095	0.0393864	1
CG2264	chr2R:5943916-5944848	0.173788	0.00356307	0.246454	0.808777	0.0394251	1
Caki	chr3R:17644740-17644845	0.223683	0.00356928	0.117648	0.809526	0.039439	1
CG34319	chrX:10150145-10150586	0.714147	0.00357152	0.0230004	0.829875	0.0394453	1
CG2264	chr2R:5949123-5949401	0.00607226	0.00357254	0.0518204	0.744032	0.0394468	1
Caps	chr4:1245456-1245623	0.00561456	0.00357277	0.257281	0.739492	0.039627	1
CG42596	chr2RHet:1849606-1849688	0.537928	0.00360184	0.806579	0.811052	0.039751	1
lig	chr2R:3957261-3957784	0.155284	0.00362195	0.784319	0.808378	0.0397561	1
Pka-R2	chr2R:5911556-5911864	0.0916003	0.00362278	0.949695	0.805781	0.0398358	1
CG10103	chr3L:6748173-6748223	0.387404	0.00363575	0.805545	0.81063	0.0399223	1
br	chrX:1502984-1503052	0.0124416	0.0036499	0.038609	0.773872	0.0399946	1
CG11489	chr3L:22270464-22270527	0.0679107	0.00366176	0.0189364	0.803585	0.0401902	1
CG3625	chr2L:291607-291879	0.658292	0.003694	0.071141	0.824357	0.0401981	1
TM4SF	chr2R:19765961-19766481	0.513363	0.00369531	0.939666	0.811	0.040199	1
CG8929	chr2R:16214949-16215068	0.621326	0.00369545	0.232515	0.820208	0.0402059	1
TM4SF	chr2R:19766107-19766481	0.513446	0.00369659	0.939317	0.811001	0.0402641	1
TM4SF	chr2R:19765688-19766481	0.514395	0.00370625	0.939761	0.811003	0.0404247	1
CG14133	chr3L:11684408-11684499	0.909095	0.00373299	0.57286	0.854314	0.0405657	1
CG11486	chr3L:3079986-3080028	0.958641	0.00375661	0.844271	0.860796	0.0405821	1
Pak	chr3R:2180636-2180902	0.599097	0.00375936	0.76382	0.81749	0.0405963	1
sar1	chr3R:18183856-18183924	0.667012	0.00376174	0.983261	0.825274	0.0407115	1
Fur2	chrX:16270273-16270373	0.131387	0.00378117	0.493414	0.807697	0.0407126	1
CG11455	chr2L:155333-155429	0.404146	0.00378136	0.44892	0.810692	0.0407201	1
Rfx	chr3R:6203413-6203846	0.94981	0.00378262	0.211786	0.859683	0.040722	1
Rfx	chr3R:6203413-6203790	0.949806	0.00378294	0.211787	0.859683	0.0407409	1
CG42324	chr3L:3486373-3486441	0.784588	0.00378613	0.424502	0.837155	0.0407415	1
CG13624	chr3R:20382935-20386039	0.986573	0.00378624	0.515774	0.864202	0.0407752	1
CG8974	chrX:15690035-15690084	0.814783	0.00379195	0.648698	0.8403	0.0408021	1
CG32479	chr3L:871867-872233	0.0138447	0.0037965	0.188569	0.776882	0.0408111	1
CG8589	chr2R:10188625-10189110	0.526918	0.00379803	0.769811	0.81103	0.040905	1
CG8481	chr3R:5593300-5593368	0.417249	0.00381399	0.996882	0.810738	0.0409501	1
SNF4Agamma	chr3R:17024844-17025118	0.0758201	0.00382168	0.257884	0.80447	0.0409981	1
Nedd4	chr3L:17535991-17536062	0.49861	0.00382988	0.401327	0.810967	0.041011	1
CG34123	chr2R:11153885-11154475	0.00432931	0.00383208	0.199861	0.722135	0.0410305	1
CG7059	chr3R:18215394-18215924	0.345091	0.00383543	0.25327	0.810444	0.0410467	1
CG31530	chr3R:583265-584133	0.691772	0.00383819	0.127037	0.827762	0.0410761	1
CG13917	chr3L:1598465-1600320	0.12441	0.00384323	0.304616	0.807449	0.0410956	1
CG17082	chr2R:632712-635432	0.168451	0.00384658	0.634361	0.808671	0.0411463	1
Syn2	chr2R:12439765-12440126	0.724661	0.00385529	0.680089	0.830826	0.0411469	1
Syn2	chr2R:12439709-12440126	0.724651	0.0038554	0.680083	0.830825	0.0411717	1
Pde11	chr2L:18546525-18547044	0.0626291	0.00385966	0.195093	0.802872	0.0411821	1
Vmat	chr2R:9400629-9405644	0.75987	0.00386145	0.262267	0.834413	0.041214	1
Cka	chr2L:8036358-8036576	0.368054	0.00386695	0.551635	0.81055	0.0412903	1
stmA	chr2R:4620807-4621000	0.0226666	0.00388013	0.0572706	0.787454	0.0413189	1
spir	chr2L:20345906-20346244	0.40187	0.00388507	0.110081	0.810684	0.0414022	1
CG32809	chrX:1586409-1586818	0.69469	0.00389952	0.227519	0.828045	0.0414417	1
CG34347	chr3R:27185988-27186272	0.967387	0.0039064	0.855994	0.86188	0.0414633	1
CG2217	chr3R:26244816-26247075	0.062592	0.00391016	0.287434	0.802866	0.0415044	1
CG17494	chr2L:22472624-22473865	0.45772	0.00391731	0.399249	0.810862	0.0416043	1
Hairless	chr3R:16448306-16449020	0.182005	0.00393478	0.688414	0.808929	0.0416133	1
Ih	chr2R:10175722-10175790	0.217663	0.00393637	0.407477	0.809453	0.0416808	1
Dyb	chr2R:8324827-8325080	0.0901666	0.00394821	0.00168812	0.805681	0.0416868	1
Plip	chr3R:19584264-19584640	0.0146397	0.00394927	0.00763931	0.77834	0.0416931	1
dnc	chrX:3140044-3140228	0.692411	0.00395038	0.0648318	0.827825	0.0417243	1
rdgC	chr3L:20254313-20254394	0.37588	0.00395588	0.871163	0.810583	0.041824	1
CG3689	chr3L:9404013-9404521	0.00811744	0.00397345	0.127552	0.758425	0.0418323	1
Ace	chr3R:9084025-9084128	0.0529574	0.00397493	0.406616	0.801201	0.0418411	1
CG5130	chr3L:20477384-20478524	0.436031	0.00397648	0.548926	0.810798	0.041881	1
Caki	chr3R:17648205-17648401	0.694186	0.00398354	0.932436	0.827996	0.0418813	1
Caki	chr3R:17648205-17648419	0.694188	0.0039836	0.932436	0.827996	0.041921	1
cv-c	chr3R:10307302-10307437	0.841571	0.00399063	0.964357	0.844443	0.0420076	1
CG30118	chr2R:14317820-14318862	0.977191	0.00400604	0.662236	0.863076	0.0420128	1
CG11486	chr3L:3079960-3080028	0.969725	0.00400696	0.820421	0.862168	0.0420222	1
CG6043	chr2L:13275588-13275865	0.531227	0.00400864	0.610765	0.811039	0.0421075	1
CG34356	chr3L:9920623-9920754	0.369448	0.00402388	0.101804	0.810556	0.0422508	1
PMCA	chr4:349646-350054	0.684672	0.00404959	0.465403	0.827066	0.0423312	1
CG8709	chr2R:4025458-4026097	0.767007	0.00406408	0.221286	0.835221	0.0423495	1
Msp-300	chr2L:5123016-5125622	0.526329	0.00406739	0.0786153	0.811028	0.0424468	1
nAcRalpha-30D	chr2L:9793424-9797192	0.280668	0.00408501	0.4116	0.810056	0.0424527	1
Slob	chr2L:7674439-7674856	0.476955	0.00408607	0.395687	0.810913	0.0424731	1
CG7990	chrX:19093860-19093918	0.104997	0.00408978	0.0330688	0.806587	0.0425594	1
CG32369	chr3L:7796369-7797810	0.915011	0.00410547	0.757311	0.85512	0.0425599	1
hts	chr2R:15295480-15295560	0.116853	0.00410556	0.110123	0.807147	0.0425711	1
CG5288	chr3L:8978519-8978725	0.456269	0.0041076	0.504475	0.810858	0.0425796	1
CG3036	chr2L:4893935-4893994	0.310039	0.00410917	0.407388	0.810253	0.0425961	1
CG1553	chr2R:3692927-3693113	0.770596	0.00411217	0.996106	0.835622	0.0426112	1
vlc	chr2R:1589736-1589804	0.475322	0.00411493	0.150511	0.810909	0.0426168	1
CG14995	chr3L:4100996-4101214	0.505402	0.00411595	0.01774	0.810982	0.0426346	1
kermit	chr2R:4036813-4036940	0.710543	0.00411921	0.989077	0.829543	0.0426414	1
pyd	chr3R:4691127-4691588	0.292498	0.00412045	0.263157	0.81014	0.0426594	1
blot	chr3L:17402325-17402972	0.523007	0.00412374	0.459918	0.811021	0.0426873	1
pyd	chr3R:4660999-4661232	0.313748	0.00412886	0.886062	0.810275	0.0427018	1
cv-c	chr3R:10306364-10306634	0.801249	0.00413152	0.645335	0.838917	0.0427122	1
Dystrophin	chr3R:15350181-15352956	0.121766	0.00413341	0.307935	0.807348	0.0427709	1
CG7337	chr2L:1938508-1938619	0.612155	0.00414419	0.638738	0.819108	0.0428959	1
CG12090	chr3L:1533857-1534063	0.0494579	0.00416725	0.515491	0.800438	0.0429876	1
Ptp99A	chr3R:25208678-25209113	0.325602	0.00418423	0.187341	0.810343	0.0429903	1
CG33205	chr3L:9817646-9817740	0.679587	0.00418473	0.210519	0.826559	0.0430534	1
tow	chr3L:6941378-6942519	0.287632	0.00419645	0.706091	0.810106	0.0430937	1
gfA	chrX:19241869-19242490	0.342745	0.00420397	0.758959	0.810433	0.0430942	1
gfA	chrX:19241869-19242480	0.34275	0.00420407	0.758963	0.810433	0.0431135	1
CG17494	chr2L:22472619-22473865	0.462028	0.00420765	0.411486	0.810874	0.0431249	1
CG32809	chrX:1586409-1586580	0.71733	0.00420979	0.28767	0.830165	0.0431334	1
CG13917	chr3L:1599979-1600320	0.130666	0.00421137	0.328461	0.807673	0.0432124	1
tim	chr2L:3503251-3504240	0.103028	0.00422616	0.0309341	0.806482	0.0433551	1
gfA	chrX:19241671-19241766	0.916522	0.00425297	0.640805	0.855324	0.0433962	1
CG8234	chr2R:7563717-7563842	0.794762	0.00426073	0.771108	0.838239	0.0434325	1
Gap1	chr3L:9847765-9848521	0.00771474	0.00426758	0.00167705	0.756158	0.0434383	1
CG1910	chr3R:27573343-27573808	0.141872	0.00426868	0.369214	0.808024	0.0434414	1
Gap1	chr3L:9847765-9848444	0.00771426	0.00426928	0.00167716	0.756155	0.0434441	1
CG1910	chr3R:27573323-27573808	0.141858	0.00426979	0.369221	0.808023	0.0434811	1
GluClalpha	chr3R:15581776-15581843	0.789702	0.00427679	0.822048	0.837703	0.0435227	1
Zasp52	chr2R:11650855-11651094	0.251248	0.00428467	0.193239	0.809812	0.0435243	1
CG42533	chr2L:7495513-7495774	0.604516	0.00428498	0.543435	0.818169	0.0435355	1
shot	chr2R:9798278-9798442	0.0862326	0.00428711	0.00853493	0.805388	0.0435378	1
endoB	chr2R:15196532-15196736	0.143141	0.00428754	0.875945	0.80806	0.0435436	1
shot	chr2R:9798278-9798451	0.0862433	0.00428865	0.00853697	0.805389	0.0435621	1
Hairless	chr3R:16447506-16449020	0.195042	0.00429216	0.652796	0.809143	0.043576	1
bol	chr3L:9116716-9116876	0.391622	0.0042948	0.780483	0.810646	0.0435785	1
cenB1A	chr3R:18946907-18946975	0.272281	0.00429528	0.447465	0.809991	0.0436003	1
hoe1	chr2L:4928244-4928412	0.371362	0.00429943	0.275335	0.810564	0.0436097	1
CG31534	chr3R:536338-536485	0.347676	0.00430123	0.399674	0.810457	0.0436177	1
CG16940	chr3L:212710-213976	0.726119	0.00430276	0.582904	0.830955	0.0436355	1
Lmpt	chr3L:16884321-16884418	0.211021	0.00430615	0.240064	0.809369	0.0437263	1
ced-6	chr2R:5332178-5332441	0.427826	0.0043235	0.434976	0.810772	0.0437663	1
faf	chr3R:27613524-27613919	0.246691	0.00433117	0.404693	0.809769	0.0437712	1
RN-tre	chr2R:9877190-9878208	0.0280777	0.00433211	0.300372	0.791766	0.0438002	1
CG18659	chr2R:5012249-5013571	0.41087	0.00433767	0.0363217	0.810716	0.0438265	1
hoe1	chr2L:4928244-4928428	0.372518	0.00434272	0.273744	0.810569	0.0439499	1
smaug	chr3L:8984896-8986141	0.437196	0.00436653	0.169367	0.810802	0.0440169	1
CG14133	chr3L:11684408-11684608	0.926243	0.00437951	0.543711	0.856625	0.0440194	1
CG14133	chr3L:11684408-11684561	0.926247	0.00437998	0.543819	0.856625	0.0440195	1
CG14133	chr3L:11684408-11684523	0.926257	0.00438001	0.543745	0.856627	0.0440302	1
SKIP	chr3R:18119181-18120901	0.00337579	0.00438208	0.503288	0.70181	0.0440791	1
CtBP	chr3R:8837641-8837741	0.286955	0.00439157	0.429363	0.810101	0.0440877	1
tws	chr3R:5960541-5960786	0.0314805	0.00439325	0.10378	0.793905	0.0441078	1
CG11455	chr2L:155333-155410	0.365325	0.00439715	0.407517	0.810538	0.0441482	1
CG18769	chr3L:6543824-6543936	0.867529	0.00440504	0.197035	0.848392	0.04416	1
aPKC	chr2R:10832656-10833922	0.278411	0.00440734	0.453011	0.810039	0.0441601	1
aPKC	chr2R:10832657-10833922	0.278411	0.00440735	0.453011	0.810039	0.0441709	1
aPKC	chr2R:10832706-10833922	0.278755	0.00440947	0.453341	0.810041	0.0441793	1
aPKC	chr2R:10832619-10833922	0.278477	0.0044111	0.453077	0.810039	0.0442316	1
msn	chr3L:2586414-2586540	0.833907	0.00442133	0.225373	0.843238	0.0442787	1
dnc	chrX:3219960-3219998	0.399588	0.00443054	0.0992569	0.810676	0.0442959	1
Galpha49B	chr2R:8501649-8501850	0.00519188	0.00443392	0.141921	0.73465	0.0443061	1
yrt	chr3R:9257137-9257256	0.0657223	0.00443593	0.258304	0.803303	0.0443732	1
CG34319	chrX:10150145-10150316	0.708191	0.00444876	0.0296323	0.829324	0.0443831	1
pnt	chr3R:19163618-19163708	0.282834	0.00445065	0.551748	0.810071	0.0444574	1
Aats-ile	chr3L:22284883-22285910	0.19546	0.00446492	0.553072	0.809149	0.0444594	1
CR41510	chr2RHet:73490-73557	0.359889	0.0044653	0.610041	0.810514	0.0447382	1
CG40498	chr2RHet:73490-73557	0.359889	0.0044653	0.610041	0.810514	0.0447382	1
CG31716	chr2L:10397427-10397474	0.151307	0.00451917	0.0849623	0.808279	0.0447514	1
CG13917	chr3L:1598465-1599914	0.102792	0.00452174	0.265151	0.806469	0.04479	1
CG6024	chr3L:11728353-11729865	0.131948	0.00452927	0.45919	0.807716	0.0448796	1
CG42533	chr2L:7477242-7478792	0.950117	0.00454674	0.0813369	0.859722	0.0448945	1
GluClalpha	chr3R:15591367-15591473	0.858721	0.00454965	0.830432	0.847075	0.0449723	1
CG3305	chr2L:21576243-21577114	0.250395	0.00456491	0.0389886	0.809804	0.0449758	1
Ca-beta	chr2L:11159270-11159729	0.158238	0.0045656	0.284439	0.808448	0.0449932	1
CG42354	chrX:15998837-15998945	0.768683	0.004569	0.431481	0.835408	0.0450041	1
CG3305	chr2L:21576243-21577145	0.250605	0.00457115	0.0390579	0.809806	0.0450354	1
CG10089	chr3L:13460044-13460239	0.388406	0.00457731	0.25562	0.810633	0.0450551	1
lig	chr2R:3960872-3960976	0.891204	0.00458118	0.29775	0.851823	0.0450862	1
mun	chr3R:16224249-16224349	0.306248	0.00458732	0.394653	0.810229	0.0450875	1
SNF4Agamma	chr3R:17006509-17006903	0.546542	0.00458757	0.324102	0.81107	0.0451226	1
CG31301	chr3R:11173199-11173347	0.126156	0.0045945	0.772676	0.807514	0.0451275	1
Aats-ile	chr3L:22284883-22285962	0.213702	0.00459546	0.578795	0.809404	0.0451417	1
Rab8	chr3L:19863481-19864207	0.981067	0.00459828	0.484119	0.863544	0.0451919	1
CG42542	chr3R:11022716-11023019	0.0607507	0.0046082	0.101814	0.802589	0.0452147	1
Rab8	chr3L:19863481-19864157	0.981332	0.00461272	0.483306	0.863575	0.0452844	1
Atx2	chr3R:11234045-11234911	0.0230449	0.00462656	0.486665	0.78773	0.0453769	1
APP-BP1	chr3L:11091329-11091397	0.201568	0.00464498	0.146671	0.809239	0.0453836	1
SKIP	chr3R:18119181-18120714	0.00276973	0.00464634	0.537407	0.682719	0.0454538	1
bol	chr3L:9116716-9116900	0.394521	0.00466036	0.772214	0.810657	0.0454738	1
MEP-1	chr3L:2632277-2632466	0.434435	0.00466437	0.0331686	0.810793	0.0455128	1
CG4168	chr2L:15162107-15163764	0.792688	0.0046722	0.946197	0.83802	0.0455279	1
CG2264	chr2R:5944227-5944848	0.204748	0.00467522	0.280622	0.809284	0.0455405	1
nAcRalpha-30D	chr2L:9796948-9797192	0.517475	0.00467776	0.125887	0.811009	0.0455714	1
CG3689	chr3L:9406491-9406775	0.384157	0.00468399	0.148207	0.810617	0.0456126	1
CG30015	chr2R:6750328-6750460	0.0502934	0.00469228	0.467026	0.80063	0.0457414	1
ftz-f1	chr3L:18756429-18758023	0.0734791	0.00471831	0.206921	0.804227	0.0457691	1
CG10543	chr2R:16890614-16890830	0.0168996	0.00472392	0.0317096	0.781757	0.0457771	1
Sdc	chr2R:17367596-17367861	0.161618	0.00472556	0.0897837	0.808525	0.0458056	1
CG1358	chr2R:3495927-3495958	0.597593	0.00473134	0.563617	0.817299	0.0458222	1
CG16940	chr3L:212844-213976	0.769397	0.00473471	0.630492	0.835488	0.045829	1
Spred	chr2R:10650424-10650579	0.301906	0.0047361	0.563451	0.810202	0.0458379	1
CG1600	chr2R:3420258-3420622	0.150179	0.00473792	0.233105	0.808251	0.0458589	1
Glut1	chr3L:959662-959842	0.486014	0.00474219	0.606888	0.810936	0.0458644	1
Ac3	chr2L:21641249-21641324	0.76525	0.00474331	0.422856	0.835023	0.0458779	1
CG32626	chrX:13726937-13727055	0.0477405	0.00474607	0.0282005	0.800024	0.0459143	1
Syt1	chr2L:2780322-2782839	0.985069	0.00475349	0.324868	0.864023	0.0459666	1
Cp110	chrX:21887779-21887910	0.0910216	0.00476417	0.107195	0.805741	0.0460078	1
cni	chr2L:16309594-16309930	0.865369	0.00477261	0.145578	0.848071	0.0460379	1
Sxl	chrX:6990936-6990968	0.00753396	0.00477878	0.919348	0.755066	0.0460865	1
Rdl	chr3L:9142900-9144212	0.889097	0.00478877	0.545906	0.851524	0.0461037	1
Cp110	chrX:21887779-21887920	0.0915913	0.00479232	0.097162	0.80578	0.0461457	1
CG33144	chr2R:6681630-6682078	0.148258	0.00480097	0.209718	0.8082	0.0462264	1
Prosap	chr2R:9947941-9951418	0.979667	0.00481763	0.762106	0.863375	0.0462356	1
Prosap	chr2R:9947909-9951418	0.979875	0.00481954	0.762788	0.8634	0.0462367	1
Hsc70Cb	chr3L:14030289-14030850	0.461592	0.00481976	0.200804	0.810872	0.0462657	1
LIMK1	chrX:12479459-12480282	0.989868	0.00482578	0.667113	0.864593	0.0462751	1
CG10089	chr3L:13459557-13459988	0.458198	0.00482773	0.384096	0.810863	0.0463132	1
ninaC	chr2L:7382758-7382945	0.329377	0.00483563	0.611747	0.810364	0.0463244	1
Rdl	chr3L:9142812-9144212	0.885458	0.00483795	0.549031	0.851005	0.0463344	1
Octbeta2R	chr3R:8378663-8378969	0.105419	0.00484004	0.142441	0.806609	0.0464139	1
grp	chr2L:16685153-16685941	0.870921	0.0048566	0.98361	0.848894	0.0465325	1
CG4168	chr2L:15162905-15163764	0.78832	0.00488139	0.948288	0.837555	0.0465662	1
Rdl	chr3L:9142800-9144212	0.885577	0.00488845	0.549964	0.851022	0.0465757	1
Dscam	chr2R:3241321-3241441	0.360908	0.00489046	0.600586	0.810519	0.0467009	1
Nmda1	chr2R:8766557-8766651	0.892699	0.00491681	0.928502	0.852035	0.0467863	1
flfl	chr3R:9515996-9516108	0.370506	0.0049349	0.240022	0.810561	0.0467975	1
CG42533	chr2L:7495513-7495787	0.612822	0.00493726	0.547463	0.819189	0.0468167	1
CG11883	chr2R:6528171-6528718	0.377586	0.00494133	0.195599	0.81059	0.0468975	1
CG1815	chr3R:27501180-27501889	0.877518	0.00495851	0.600754	0.849859	0.0469691	1
Ca-beta	chr2L:11165564-11165678	0.484257	0.00497378	0.148556	0.810932	0.0469933	1
CG11883	chr2R:6528019-6528718	0.376443	0.00497895	0.195987	0.810586	0.0470321	1
CG13830	chr3R:18898138-18898450	0.424889	0.00498726	0.0303535	0.810763	0.0470514	1
SNF4Agamma	chr3R:17011270-17011306	0.287214	0.00499139	0.486806	0.810103	0.0470697	1
AGO2	chr3L:15553741-15554211	0.393492	0.00499532	0.0777414	0.810653	0.0471217	1
CG8331	chr2R:10060252-10060496	0.456751	0.00500648	0.546182	0.810859	0.047163	1
CG33233	chr3L:2660769-2661319	0.329058	0.00501538	0.192373	0.810362	0.0471711	1
SKIP	chr3R:18119181-18120654	0.00291113	0.00501712	0.575962	0.687781	0.047211	1
trio	chr3L:1007217-1007826	0.154222	0.00502572	0.172871	0.808352	0.0472473	1
lilli	chr2L:2924914-2925144	0.671602	0.00503357	0.604302	0.825748	0.0472786	1
CG1513	chr2R:5771050-5771348	0.0268216	0.00504035	0.43809	0.790854	0.0472984	1
cp309	chr3L:15065080-15065284	0.0741708	0.00504464	0.385008	0.804301	0.0473035	1
hoe1	chr2L:4915047-4915634	0.288647	0.00504573	0.343125	0.810113	0.0473086	1
CG1910	chr3R:27576367-27576745	0.613584	0.00504685	0.451501	0.819282	0.0473096	1
Adar	chrX:1672406-1672732	0.150746	0.00504707	0.912383	0.808265	0.0473528	1
CG4068	chrX:4825091-4825224	0.0456867	0.00505643	0.139332	0.799487	0.0473579	1
CG31301	chr3R:11173186-11173347	0.1295	0.00505754	0.799722	0.807633	0.0473583	1
Dystrophin	chr3R:15319935-15320040	0.683324	0.00505763	0.618864	0.826932	0.0474167	1
Sdc	chr2R:17367596-17367883	0.172683	0.00507032	0.0898403	0.808756	0.0474241	1
tow	chr3L:6936011-6936201	0.296859	0.00507194	0.422201	0.810169	0.0474241	1
tow	chr3L:6936038-6936201	0.296859	0.00507195	0.422201	0.810169	0.0475437	1
Slob	chr2L:7659192-7659567	0.0267971	0.00509809	0.0223575	0.790835	0.0475762	1
CG31301	chr3R:11171953-11172405	0.119542	0.0051052	0.444286	0.807259	0.04758	1
CG31301	chr3R:11171936-11172405	0.119551	0.00510602	0.444311	0.807259	0.0476186	1
CG32809	chrX:1586409-1586748	0.712357	0.00511451	0.285197	0.82971	0.047655	1
CG3532	chr3R:7840235-7840784	0.917737	0.00512252	0.182836	0.855488	0.0476827	1
l(1)G0255	chrX:6573061-6573196	0.0238856	0.00512862	0.0182692	0.788357	0.0477111	1
Pka-R2	chr2R:5911556-5911935	0.174239	0.00513487	0.926459	0.808786	0.0477285	1
para	chrX:16374713-16374835	0.07566	0.00513872	0.998918	0.804453	0.0477454	1
NPFR76F	chr3L:20053096-20053821	0.917089	0.00514246	0.423794	0.855401	0.047764	1
sar1	chr3R:18182397-18182520	0.505452	0.00514657	0.539166	0.810982	0.0478051	1
Hnf4	chr2L:8698849-8699416	0.560754	0.00515566	0.162947	0.812344	0.0478246	1
CG17528	chr2R:703553-705235	0.830733	0.00515999	0.978136	0.842733	0.0479225	1
nuf	chr3L:14193265-14193547	0.882087	0.00518175	0.221747	0.85052	0.0479274	1
CG13917	chr3L:1598465-1600344	0.198269	0.00518284	0.36143	0.809191	0.0479288	1
CG17839	chr3L:14874445-14874959	0.398451	0.00518315	0.374318	0.810671	0.0479435	1
CG6707	chr3L:9891029-9891566	0.0293399	0.00518641	0.0312679	0.792606	0.047988	1
pcx	chrX:2129612-2130037	0.946904	0.00519636	0.134851	0.859313	0.0480069	1
CG8331	chr2R:10060252-10060502	0.476587	0.00520058	0.571717	0.810912	0.0480243	1
CG41265	chr2RHet:494133-494346	0.437187	0.00520446	0.394958	0.810802	0.0480577	1
tacc	chr3R:563195-563585	0.619545	0.00521194	0.20078	0.819997	0.0480586	1
CG18437	chr3R:23488909-23489163	0.407696	0.00521215	0.770143	0.810705	0.0480619	1
RN-tre	chr2R:9877899-9878066	0.0502506	0.00521288	0.401288	0.80062	0.0480993	1
bves	chrX:20951807-20952003	0.551243	0.00522128	0.0562496	0.811083	0.0481102	1
CG34123	chr2R:11154197-11154475	0.00183203	0.00522373	0.113893	0.633583	0.0481211	1
CG9253	chr2L:21143167-21143503	0.918287	0.00522618	0.317362	0.855562	0.0481251	1
CG9253	chr2L:21143227-21143503	0.918276	0.00522706	0.317321	0.855561	0.0482185	1
tow	chr3L:6936056-6936201	0.305053	0.00524811	0.421957	0.810222	0.0482187	1
Mlf	chr2R:11825184-11825384	0.0399407	0.00524814	0.857361	0.797699	0.0483044	1
CG7115	chr2L:7821534-7821648	0.0291319	0.00526752	0.207185	0.792473	0.0483478	1
Eaat1	chr2L:9333568-9333659	0.510035	0.00527737	0.960887	0.810993	0.0484724	1
CG4068	chrX:4830046-4830184	0.072531	0.00530573	0.0791888	0.804125	0.0484917	1
CG4662	chr3R:15673904-15673972	0.73408	0.00531013	0.275209	0.831665	0.0485272	1
CG41265	chr2RHet:494110-494346	0.444206	0.00531824	0.391164	0.810823	0.0485643	1
skd	chr3L:21020396-21020531	0.04594	0.00532674	0.794844	0.799556	0.0485656	1
skd	chr3L:21020396-21020524	0.0459398	0.00532704	0.794857	0.799556	0.0486161	1
Hph	chr3R:1092321-1092389	0.375015	0.00533862	0.0455328	0.81058	0.0486191	1
CG42533	chr2L:7495513-7495793	0.635515	0.00533933	0.542189	0.821852	0.0486623	1
CG2017	chr3R:1686712-1687088	0.0960896	0.00534926	0.408707	0.806076	0.0486936	1
Chro	chr3L:22871037-22871118	0.00579743	0.00535647	0.00202184	0.741385	0.0488299	1
CG12424	chr2R:10850860-10850928	0.0723115	0.00538798	0.00168211	0.804101	0.0488451	1
CG32626	chrX:13726937-13727064	0.0463153	0.00539152	0.028538	0.799656	0.0488558	1
CG42555	chr2L:16888501-16889125	0.0235624	0.00539399	0.600353	0.788093	0.0488653	1
pUf68	chr3L:1499772-1499879	0.841363	0.00539621	0.480067	0.844411	0.0489832	1
CAH2	chr3L:12175599-12176490	0.688025	0.00542367	0.941659	0.827396	0.049008	1
Tif-IA	chr2L:22250372-22250853	0.484573	0.00542945	0.367213	0.810933	0.049033	1
CG32043	chr3L:9463660-9464132	0.911557	0.00543531	0.987362	0.854651	0.0491115	1
sar1	chr3R:18182397-18182574	0.504538	0.00545371	0.519164	0.81098	0.0491174	1
sbb	chr2R:14176065-14176279	0.0754093	0.0054551	0.270424	0.804428	0.0491763	1
CG18437	chr3R:23488556-23489163	0.411496	0.00546897	0.79121	0.810718	0.0492003	1
Rcd1	chr2R:10039112-10039431	0.161429	0.00547463	0.240731	0.808521	0.0492261	1
gfA	chrX:19221450-19223753	0.654141	0.00548071	0.491494	0.823912	0.0493286	1
unc79	chr3R:15057462-15057640	0.190909	0.00550498	0.326025	0.809078	0.0493337	1
CAH2	chr3L:12175599-12176455	0.722976	0.00550617	0.952763	0.830675	0.0493842	1
rdgC	chr3L:20254286-20254394	0.379055	0.00551817	0.822365	0.810596	0.0494161	1
mbl	chr2R:13239634-13241068	0.455831	0.00552577	0.917366	0.810856	0.0494503	1
gfA	chrX:19221177-19223753	0.675167	0.00553392	0.490581	0.826112	0.0494503	1
gfA	chrX:19221105-19223753	0.675167	0.00553392	0.490581	0.826112	0.0494634	1
CG6707	chr3L:9891029-9891575	0.0309814	0.00553705	0.0291683	0.793617	0.0494818	1
CG7337	chr2L:1909669-1909992	0.484289	0.00554144	0.276478	0.810932	0.0495128	1
Mef2	chr2R:5801001-5804396	0.516376	0.00554885	0.662387	0.811007	0.0495182	1
CG42256	chr3L:7160948-7161121	0.140675	0.00555014	0.0542945	0.807989	0.0495575	1
hppy	chr2R:15067004-15067363	0.673705	0.00555956	0.0839507	0.825963	0.0495589	1
CG31116	chr3R:7623996-7624265	0.846419	0.0055599	0.338938	0.845197	0.0495809	1
Lmpt	chr3L:16884313-16884414	0.336999	0.00556516	0.211541	0.810404	0.0496072	1
CG18659	chr2R:5015876-5016146	0.803122	0.00557149	0.424255	0.839111	0.0496159	1
Best1	chr3R:5988755-5988799	0.575677	0.00557358	0.0361146	0.81442	0.049617	1
Mpcp	chr3L:14530683-14530802	0.112116	0.00557385	0.156795	0.806938	0.049622	1
14-3-3zeta	chr2R:5994972-5996008	0.201428	0.00557504	0.222379	0.809237	0.0496228	1
Cka	chr2L:8036382-8036576	0.397802	0.00557523	0.635559	0.810669	0.0496546	1
aPKC	chr2R:10831960-10832732	0.283528	0.00558288	0.345069	0.810077	0.0497098	1
CG13830	chr3R:18898059-18898450	0.577167	0.0055962	0.0397454	0.814622	0.0497208	1
CG32529	chrX:19762434-19765626	0.277711	0.00559887	0.602772	0.810033	0.0497274	1
MRP	chr2L:12738807-12739188	0.246263	0.00560046	0.355156	0.809765	0.0497397	1
Cnx99A	chr3R:25141295-25141601	0.744266	0.00560344	0.683556	0.832639	0.0497683	1
CG3198	chrX:6563148-6563570	0.511307	0.00561035	0.317298	0.810996	0.0497698	1
Ddip2	chr3L:258098-258174	0.0364585	0.0056107	0.505112	0.796346	0.0497807	1
vtd	chr3LHet:2263374-2263535	0.791802	0.00561334	0.170336	0.837926	0.0498762	1
CG4678	chrX:16604811-16605178	0.38777	0.00563654	0.534592	0.810631	0.0499305	1
norpA	chrX:4241951-4242063	0.291873	0.00564977	0.997404	0.810135	0.0499322	1
Sdc	chr2R:17367596-17368044	0.136696	0.00565018	0.073833	0.807869	0.0500015	1
CG7971	chr3L:1654879-1655020	0.814042	0.0056671	0.249227	0.840226	0.0500152	1
E(bx)	chr3L:239243-240667	0.81051	0.00567045	0.162282	0.839868	0.0501295	1
pdfr	chrX:2447752-2448450	0.0606351	0.00569851	0.158172	0.802571	0.050177	1
CG33558	chr2R:2813366-2813803	0.780255	0.00571022	0.179892	0.836685	0.0502095	1
CG11873	chr3R:24930226-24932738	0.280904	0.00571825	0.263442	0.810057	0.0502517	1
CG3967	chr3L:9407938-9408396	0.992092	0.00572868	0.41972	0.864855	0.0502779	1
14-3-3zeta	chr2R:5994972-5997238	0.382122	0.00573518	0.162932	0.810609	0.0503043	1
SNF4Agamma	chr3R:17011238-17011306	0.313206	0.00574172	0.44814	0.810272	0.050312	1
14-3-3zeta	chr2R:5994972-5997232	0.382428	0.00574363	0.163034	0.81061	0.0503145	1
AGO2	chr3L:15553750-15554151	0.427648	0.00574425	0.088099	0.810772	0.050346	1
14-3-3zeta	chr2R:5994972-5997195	0.382556	0.0057521	0.163106	0.81061	0.0503719	1
Dyb	chr2R:8324858-8325076	0.105185	0.00575852	0.00190816	0.806597	0.0504242	1
Utx	chr2L:10276812-10276965	0.311141	0.00577157	0.133155	0.810259	0.0504277	1
AGO2	chr3L:15553741-15554151	0.424691	0.00577244	0.0813332	0.810762	0.0504404	1
Bili	chr3R:20958063-20958223	0.0964598	0.00577561	0.542272	0.806099	0.0504448	1
tow	chr3L:6936036-6936106	0.221529	0.00577671	0.532195	0.8095	0.0504448	1
tow	chr3L:6935958-6936106	0.22153	0.00577672	0.532196	0.8095	0.0504748	1
PMCA	chr4:349442-350054	0.717228	0.00578421	0.525261	0.830156	0.0504756	1
Bili	chr3R:20958043-20958223	0.096993	0.0057844	0.542539	0.806132	0.0505054	1
Pde11	chr2L:18562883-18563180	0.0234419	0.00579187	0.132677	0.78801	0.050513	1
gfA	chrX:19222593-19223753	0.788018	0.00579377	0.471653	0.837523	0.0505213	1
gfA	chrX:19222594-19223753	0.790241	0.00579587	0.470139	0.83776	0.0505463	1
dpr14	chrX:7802132-7802319	0.0306571	0.00580212	0.0156883	0.793426	0.0505704	1
aux	chr3R:52486-53244	0.839161	0.00580819	0.143462	0.844066	0.0505969	1
Dyb	chr2R:8324815-8325076	0.104457	0.00581484	0.00183095	0.806559	0.0506033	1
CG31475	chr3R:15026500-15026845	0.376905	0.00581645	0.135392	0.810587	0.0506056	1
CG2950	chr2L:4844309-4844646	0.97316	0.00581704	0.949088	0.862587	0.0506202	1
CG42533	chr2L:7472505-7473889	0.992523	0.00582072	0.405066	0.864906	0.0506256	1
CG34123	chr2R:11154090-11154475	0.00264133	0.00582206	0.13416	0.677727	0.0506754	1
PMCA	chr4:349350-350054	0.716152	0.00583464	0.525406	0.830058	0.0507685	1
lola	chr2R:6419253-6419624	0.981503	0.00585818	0.462795	0.863596	0.0507942	1
CG7971	chr3L:1654878-1655020	0.803955	0.00586473	0.26638	0.839197	0.0508025	1
bbc	chr2R:9374136-9375414	0.00418573	0.00586682	0.0372408	0.719604	0.0508085	1
rdx	chr3R:9792831-9795052	0.260973	0.00586834	0.57509	0.809898	0.0508092	1
Task6	chr3R:9493037-9494556	0.968109	0.00586852	0.307569	0.861969	0.05081	1
CG2264	chr2R:5944554-5944848	0.385032	0.00586873	0.298367	0.81062	0.0508342	1
14-3-3zeta	chr2R:5994972-5996042	0.206843	0.00587489	0.225587	0.809313	0.0508405	1
bbc	chr2R:9374133-9375414	0.00418154	0.00587648	0.0371689	0.719528	0.050851	1
smaug	chr3L:8990679-8991206	0.532701	0.00587917	0.382301	0.811042	0.0508552	1
CG31475	chr3R:15026500-15026820	0.387002	0.00588023	0.152972	0.810628	0.0509168	1
bbc	chr2R:9374129-9375414	0.00419051	0.00589594	0.0372764	0.719691	0.0509301	1
CG7231	chr2L:7983920-7984238	0.0358908	0.00589935	0.0238297	0.796101	0.050943	1
CG3967	chr3L:9407718-9408396	0.916592	0.00590264	0.397051	0.855334	0.0510547	1
Pect	chr2L:13208665-13208777	0.502784	0.00593127	0.0322889	0.810976	0.0511087	1
ssp4	chr2R:13414719-13414820	0.248806	0.00594517	0.263527	0.809789	0.0511441	1
Rab14	chr2L:14358006-14358750	0.872062	0.00595431	0.619444	0.849061	0.0511441	1
Rab14	chr2L:14358006-14358767	0.872061	0.00595432	0.619444	0.849061	0.0511452	1
Ilp3	chr3L:9794975-9795663	0.0107299	0.0059546	0.105065	0.76918	0.0511795	1
Rbp9	chr2L:2959176-2959520	0.826036	0.00596346	0.81759	0.84198	0.0512329	1
Ranbp16	chrX:15825917-15826019	0.101569	0.00597729	0.0693795	0.806401	0.0512342	1
Rbp9	chr2L:2959103-2959520	0.823101	0.00597762	0.816127	0.841506	0.0512626	1
chic	chr2L:5980209-5980498	0.0464029	0.00598501	0.531756	0.79968	0.0513079	1
CG42588	chr3L:12807358-12807980	0.45144	0.00599677	0.168055	0.810844	0.0513085	1
CG42588	chr3L:12807353-12807980	0.451469	0.00599694	0.168058	0.810844	0.0513881	1
sar1	chr3R:18182397-18182489	0.564637	0.00601769	0.599456	0.812894	0.0514032	1
CG3532	chr3R:7840226-7840824	0.908334	0.00602163	0.18392	0.85421	0.0514212	1
CG2747	chr3R:3852499-3852886	0.521662	0.00602635	0.125143	0.811018	0.051423	1
CG2747	chr3R:3852499-3852938	0.52172	0.00602681	0.12517	0.811019	0.0514263	1
CG2747	chr3R:3852499-3852877	0.521727	0.00602768	0.125164	0.811019	0.0514388	1
Snx6	chr2L:8218570-8218679	0.313194	0.00603095	0.623086	0.810272	0.0514532	1
Tif-IA	chr2L:22250545-22250853	0.477749	0.00603473	0.254528	0.810915	0.0514669	1
swm	chr2L:19493252-19493957	0.88642	0.00603832	0.250379	0.851142	0.0515331	1
Ark	chr2R:12910590-12911053	0.111922	0.00605571	0.239162	0.806929	0.0515391	1
CG17698	chr3L:23740973-23741160	0.618082	0.00605727	0.485313	0.819823	0.051548	1
lola	chr2R:6419544-6419624	0.995804	0.00605963	0.328969	0.865291	0.0515593	1
CG42588	chr3L:12807621-12807980	0.509385	0.00606259	0.288039	0.810991	0.0516	1
aux	chr3R:52473-53244	0.838313	0.00607333	0.16006	0.843933	0.0516669	1
Mmp2	chr2R:5500943-5501264	0.0829848	0.00609101	0.434433	0.805126	0.0517004	1
ltd	chr2R:5068235-5068663	0.851679	0.00609988	0.899751	0.846005	0.0517339	1
Paip2	chr3R:8809833-8810345	0.352604	0.00610878	0.0358422	0.810481	0.0517648	1
CG31869	chr2L:10800841-10801113	0.0863634	0.006117	0.0862675	0.805398	0.0517663	1
ssp4	chr2R:13415818-13415880	0.0368028	0.00611738	0.0306363	0.796491	0.0517847	1
14-3-3zeta	chr2R:5994972-5996246	0.322075	0.00612228	0.200074	0.810323	0.0518306	1
Sema-1a	chr2L:8543283-8543418	0.526037	0.00613454	0.844134	0.811028	0.0518947	1
Pka-R2	chr2R:5913334-5913540	0.218332	0.00615164	0.747654	0.809462	0.0519177	1
Syt1	chr2L:2799909-2799999	0.0623619	0.00615781	0.00615876	0.802833	0.0519311	1
14-3-3zeta	chr2R:5994972-5997005	0.385425	0.00616141	0.169251	0.810622	0.051944	1
Lsd-1	chr3R:19590823-19590900	0.260891	0.00616486	0.640634	0.809898	0.0519743	1
fwd	chr3L:319747-319924	0.847252	0.00617301	0.0211083	0.845325	0.0519754	1
CG42321	chr2R:9311419-9312190	0.236907	0.00617331	0.445818	0.809671	0.0520233	1
CG3967	chr3L:9407481-9408396	0.698834	0.00618619	0.328993	0.828443	0.0520824	1
Rdl	chr3L:9143446-9144212	0.785356	0.00620214	0.63689	0.837237	0.052126	1
CG4238	chr2L:2028321-2029028	0.665821	0.00621393	0.70468	0.82515	0.0521286	1
Pka-R2	chr2R:5913334-5913643	0.219652	0.00621463	0.744864	0.809478	0.052153	1
trio	chr3L:1029080-1029623	0.509129	0.00622124	0.967047	0.810991	0.0521812	1
CG9339	chr2L:20918639-20918944	0.243966	0.00622889	0.164941	0.809742	0.0521818	1
Syt1	chr2L:2799909-2799977	0.0624509	0.00622906	0.0061854	0.802846	0.0522047	1
swm	chr2L:19493533-19493957	0.886617	0.00623526	0.264221	0.851171	0.0522128	1
PMCA	chr4:349098-350054	0.73238	0.00623746	0.530446	0.831508	0.0522344	1
nrm	chr3L:22991366-22991866	0.197621	0.00624335	0.250089	0.809182	0.0522717	1
mura	chr3R:5361838-5365012	0.526988	0.00625351	0.0863496	0.81103	0.0522779	1
TM4SF	chr2R:19767147-19767335	0.1162	0.00625519	0.811375	0.80712	0.0522789	1
mura	chr3R:5361848-5365012	0.526916	0.00625547	0.0863108	0.81103	0.0522883	1
Abi	chr3R:9947468-9947834	0.0499362	0.00625803	0.0454765	0.800549	0.0522962	1
Abi	chr3R:9947468-9947988	0.0499289	0.00626019	0.0454827	0.800547	0.0523089	1
Ect4	chr3L:8089647-8089976	0.500598	0.00626366	0.234065	0.810971	0.0523089	1
Ect4	chr3L:8089633-8089976	0.500609	0.00626366	0.23407	0.810971	0.0523179	1
Syt1	chr2L:2799909-2799970	0.0617087	0.00626612	0.0061339	0.802735	0.0523252	1
mle	chr2R:1868124-1868283	0.764227	0.0062681	0.436847	0.834908	0.052326	1
mle	chr2R:1868124-1868277	0.764239	0.00626834	0.436842	0.834909	0.0523575	1
CG10089	chr3L:13459104-13459988	0.692839	0.00627695	0.362504	0.827866	0.0523806	1
CG9990	chr3R:24515368-24515436	0.00226588	0.00628327	0.0102761	0.660467	0.0524043	1
Sos	chr2L:13819335-13820184	0.303494	0.00628978	0.0855833	0.810212	0.0524151	1
Rab8	chr3L:19863727-19864157	0.983614	0.00629273	0.559258	0.863849	0.0524587	1
woc	chr3R:23087838-23087882	0.399279	0.00630386	0.644099	0.810674	0.0525038	1
nrm	chr3L:22991451-22991866	0.199062	0.00631541	0.252918	0.809203	0.0525164	1
gw	chr4:680547-680696	0.236247	0.00631863	0.312346	0.809664	0.0525852	1
gfA	chrX:19228448-19228557	0.624633	0.00633628	0.237138	0.820597	0.0526741	1
SNF4Agamma	chr3R:17011203-17011306	0.326279	0.00635914	0.474622	0.810347	0.0526754	1
CG9339	chr2L:20918639-20918929	0.250652	0.00635949	0.164294	0.809806	0.0527014	1
CG5284	chr3L:16087450-16087648	0.79363	0.00636619	0.548776	0.838119	0.0527049	1
5PtaseI	chr3R:20866784-20868403	0.121621	0.0063671	0.0265643	0.807342	0.0527064	1
swm	chr2L:19493571-19493957	0.881495	0.00636748	0.269274	0.850435	0.0527353	1
Ect3	chr3R:7828020-7829248	0.139945	0.00637497	0.12203	0.807967	0.0527575	1
Nedd8	chr2L:18951407-18951537	0.0900601	0.00638069	0.00933527	0.805673	0.0528072	1
Sug	chr3L:11681252-11681925	0.0466369	0.00639358	0.0139627	0.799741	0.0529835	1
mura	chr3R:5362205-5365012	0.497388	0.00643946	0.0852894	0.810964	0.0529838	1
Rpn5	chr3R:1615211-1615436	0.31634	0.00643954	0.882331	0.81029	0.0530468	1
CG33558	chr2R:2813382-2813803	0.677453	0.00645602	0.184851	0.826344	0.0530614	1
CG1969	chr3R:25565107-25565701	0.085378	0.00645986	0.147378	0.805321	0.0530775	1
CG6707	chr3L:9891029-9891302	0.019032	0.00646408	0.0221431	0.784255	0.0531301	1
CG17841	chrX:10276615-10277330	0.195132	0.0064779	0.22164	0.809144	0.0531568	1
bves	chrX:20951807-20952183	0.593609	0.00648493	0.0827361	0.81679	0.0532034	1
Graf	chrX:15651889-15652350	0.337889	0.0064972	0.565688	0.810408	0.0532176	1
CG14042	chr2L:5040120-5040816	0.6363	0.00650096	0.221982	0.821942	0.0532313	1
TfIIA-L	chr3R:23080250-23080450	0.0182759	0.00650457	0.0997139	0.783434	0.0532346	1
mura	chr3R:5362787-5365012	0.47003	0.00650544	0.0882689	0.810895	0.0532359	1
CLIP-190	chr2L:17389341-17389530	0.257964	0.00650579	0.706903	0.809872	0.0532462	1
atl	chr3R:20459280-20460436	0.341503	0.00650851	0.266858	0.810427	0.0532691	1
SP555	chr2L:5040120-5040818	0.636192	0.00651456	0.221978	0.821929	0.0533206	1
Csp	chr3L:22264014-22264076	0.109877	0.00652821	0.195251	0.806832	0.0533695	1
RhoGEF2	chr2R:12914680-12914848	0.632006	0.00654119	0.730124	0.821452	0.0533928	1
Camta	chr2R:5345207-5346262	0.152211	0.00654739	0.477394	0.808302	0.0533962	1
CtBP	chr3R:8845151-8845536	0.715891	0.00654829	0.398646	0.830034	0.0534096	1
CG13624	chr3R:20384755-20386039	0.993234	0.00655185	0.66284	0.864989	0.0534112	1
atl	chr3R:20459280-20460471	0.332464	0.00655228	0.268772	0.81038	0.0534181	1
Rdl	chr3L:9142181-9144212	0.899652	0.00655411	0.541874	0.85301	0.0534291	1
CG1358	chr2R:3501109-3502040	0.686586	0.00655704	0.763644	0.827255	0.0534508	1
MEP-1	chr3L:2633538-2633809	0.393485	0.00656284	0.121665	0.810653	0.053504	1
CG31051	chr3R:24345208-24345728	0.0685652	0.00657703	0.513178	0.803666	0.0535618	1
Pka-R2	chr2R:5911556-5911707	0.0993881	0.0065925	0.929127	0.806276	0.0535893	1
Sos	chr2L:13819335-13819879	0.304692	0.0065999	0.0839738	0.81022	0.0536006	1
CG42458	chr3L:7445903-7446360	0.892509	0.0066029	0.746188	0.852008	0.0536244	1
Nup153	chrX:16493265-16493672	0.160755	0.00660932	0.0498111	0.808506	0.0536301	1
CG14042	chr2L:5039809-5040816	0.646046	0.00661084	0.221113	0.82303	0.0536575	1
CG2950	chr2L:4844169-4844646	0.957209	0.00661822	0.909741	0.860617	0.0536611	1
CG5521	chr3R:22796049-22796066	0.167882	0.00661919	0.0626995	0.808659	0.0536818	1
SP555	chr2L:5039809-5040818	0.645943	0.00662475	0.221111	0.823019	0.0536987	1
CLIP-190	chr2L:17389297-17389530	0.259173	0.00662932	0.686325	0.809883	0.0537084	1
CG42321	chr2R:9311419-9312236	0.229188	0.00663194	0.466371	0.809588	0.0537312	1
Hsc70-3	chrX:11699924-11699992	0.00467651	0.00663809	0.00236571	0.727675	0.0537475	1
shot	chr2R:9798282-9798451	0.105615	0.00664248	0.0117746	0.806619	0.0538233	1
eas	chrX:16175011-16175306	0.41206	0.00666298	0.910406	0.81072	0.0538241	1
RhoGEF2	chr2R:12914680-12914844	0.640627	0.00666321	0.739944	0.822429	0.0538327	1
sar1	chr3R:18182397-18182769	0.529248	0.00666554	0.392814	0.811035	0.0538582	1
ade5	chrX:12654382-12654785	0.0113828	0.00667244	0.0968711	0.771129	0.0539068	1
tws	chr3R:5965049-5965496	0.0119413	0.00668565	0.175786	0.772634	0.0539089	1
Paip2	chr3R:8809833-8810365	0.366771	0.00668622	0.0360657	0.810545	0.0539502	1
CG3860	chr2R:19882553-19882605	0.561273	0.00669719	0.0525395	0.812418	0.0539913	1
nAcRbeta-96A	chr3R:20337206-20339544	0.438121	0.00670811	0.250478	0.810804	0.054084	1
ed	chr2L:4113621-4115411	0.672381	0.00673284	0.714082	0.825828	0.0541863	1
Nckx30C	chr2L:9716186-9717763	0.325829	0.00676022	0.561148	0.810344	0.054189	1
Dh31	chr2L:8492708-8493092	0.434571	0.00676094	0.688721	0.810794	0.0542583	1
bol	chr3L:9116716-9116922	0.345713	0.00677957	0.801444	0.810447	0.0543049	1
CG8331	chr2R:10057870-10058227	0.0929358	0.00679213	0.467398	0.805872	0.054324	1
Kdm4B	chr2R:9085182-9085664	0.116479	0.00679726	0.723854	0.807131	0.0543315	1
CG13624	chr3R:20384666-20386039	0.990987	0.00679928	0.66899	0.864725	0.0543491	1
Pde9	chrX:12685497-12685781	0.546211	0.00680405	0.218584	0.811069	0.0543993	1
Nckx30C	chr2L:9716180-9717763	0.328751	0.00681764	0.568247	0.81036	0.0544582	1
SKIP	chr3R:18119181-18121379	0.00649801	0.00683358	0.495812	0.747722	0.0544628	1
shot	chr2R:9791319-9791687	0.485731	0.00683484	0.137419	0.810935	0.0544644	1
Graf	chrX:15651889-15652362	0.336673	0.00683527	0.562754	0.810402	0.0545475	1
Dscam	chr2R:3247172-3247295	0.157117	0.00685788	0.301264	0.808422	0.0545579	1
CG5261	chr2L:7428281-7428610	0.273026	0.00686071	0.880451	0.809997	0.0545709	1
tws	chr3R:5965049-5965719	0.0124757	0.00686424	0.173132	0.773953	0.0545755	1
tws	chr3R:5965049-5965678	0.0124771	0.00686552	0.17315	0.773956	0.0545794	1
CG30463	chr2R:12593014-12593784	0.120436	0.00686657	0.0896035	0.807295	0.0546015	1
CG11306	chr3L:21618995-21619063	0.0339893	0.0068726	0.671015	0.795223	0.054616	1
aralar1	chr3R:26275951-26276206	0.0455276	0.00687658	0.234243	0.799444	0.0546752	1
Rgl	chr3L:13912291-13913124	0.810437	0.00689278	0.438764	0.839861	0.0546812	1
Ptp99A	chr3R:25203344-25203746	0.394588	0.0068944	0.388222	0.810657	0.0547106	1
CG4168	chr2L:15163221-15163764	0.859015	0.00690246	0.9572	0.847119	0.0547586	1
Caki	chr3R:17643874-17644231	0.826701	0.00691566	0.893122	0.842087	0.0549049	1
Msp-300	chr2L:5142003-5144785	0.261449	0.00695601	0.0688127	0.809903	0.0549742	1
Rgl	chr3L:13918099-13918443	0.151585	0.0069752	0.168661	0.808287	0.0550402	1
Rgl	chr3L:13918099-13918519	0.173276	0.00699356	0.170231	0.808767	0.0551189	1
DopEcR	chr3L:4367640-4369737	0.246363	0.00701548	0.292052	0.809766	0.055119	1
DopEcR	chr3L:4367644-4369737	0.246359	0.00701551	0.292053	0.809766	0.0551768	1
CG31534	chr3R:536338-536442	0.323079	0.00703167	0.346188	0.810329	0.0551984	1
CG12004	chr3L:1573994-1575590	0.951577	0.00703772	0.727663	0.859907	0.05522	1
Rad23	chr4:329057-329705	0.818153	0.00704377	0.295618	0.8407	0.0552387	1
Rad23	chr4:329000-329705	0.816688	0.00704902	0.298418	0.840492	0.0552434	1
Paip2	chr3R:8809833-8811317	0.392981	0.00705034	0.0365152	0.810651	0.0552575	1
Ca-P60A	chr2R:19816837-19816954	0.666619	0.00705432	0.100391	0.825233	0.0552951	1
CG33233	chr3L:2661383-2661501	0.183904	0.00706489	0.0453162	0.808962	0.0553391	1
Rad23	chr4:329036-329705	0.815625	0.00707728	0.29779	0.840385	0.0553755	1
Rad23	chr4:329039-329705	0.815629	0.00708755	0.298609	0.840385	0.0553925	1
swm	chr2L:19493666-19493957	0.863858	0.00709234	0.267213	0.847846	0.0554115	1
Neu3	chr3R:10493575-10494717	0.0862241	0.00709771	0.580871	0.805388	0.0554355	1
CG2269	chr2R:5975078-5975109	0.712576	0.00710452	0.244938	0.82973	0.055442	1
Nckx30C	chr2L:9718266-9718520	0.0255476	0.00710636	0.0163971	0.789839	0.0555312	1
Hsc70Cb	chr3L:14030578-14030850	0.688098	0.00713166	0.318854	0.827404	0.0557315	1
cpx	chr3R:107427-107593	0.120953	0.00718887	0.734971	0.807316	0.0557316	1
cpx	chr3R:107426-107593	0.120953	0.0071889	0.734971	0.807316	0.0557534	1
fl(2)d	chr2R:9709271-9709630	0.374291	0.00719516	0.316495	0.810577	0.0557626	1
futsch	chrX:1342880-1346342	0.919411	0.0071978	0.434109	0.855713	0.055763	1
dos	chr3L:2589273-2589552	0.979406	0.0071979	0.956973	0.863344	0.0557908	1
unc-13	chr4:902469-902575	0.118754	0.00720589	0.0759412	0.807227	0.0557976	1
rab3-GEF	chrX:14991661-14992798	0.0558089	0.00720785	0.00413401	0.801753	0.0558094	1
Rpn5	chr3R:1615211-1615415	0.568417	0.00721125	0.589734	0.813423	0.0558175	1
CG31352	chr3R:5520206-5520945	0.490662	0.00721356	0.559585	0.810948	0.055823	1
Dscam	chr2R:3232169-3232459	0.369447	0.00721516	0.734212	0.810556	0.0558664	1
nAcRalpha-30D	chr2L:9795698-9797192	0.156238	0.00722768	0.575248	0.808401	0.0558711	1
dnc	chrX:3139793-3140228	0.537495	0.00722901	0.0652481	0.811052	0.0558776	1
CG31352	chr3R:5520234-5520945	0.490829	0.0072309	0.560541	0.810948	0.0558944	1
CG9153	chr3L:1314158-1314320	0.364951	0.00723576	0.42032	0.810537	0.0559381	1
wech	chr2R:3373390-3373672	0.134162	0.00724838	0.493205	0.807788	0.0559489	1
Sug	chr3L:11681252-11681438	0.115273	0.00725153	0.0680481	0.807079	0.0559522	1
CG8486	chr2L:8163297-8163457	0.186323	0.00725246	0.348261	0.809003	0.0559649	1
Uhg5	chr2R:10509837-10510036	0.374263	0.00725614	0.682714	0.810577	0.0560209	1
NPFR76F	chr3L:20052109-20053821	0.86942	0.00727239	0.584647	0.848672	0.056054	1
CG34365	chr2R:11297023-11298047	0.95665	0.00728201	0.672776	0.860546	0.0560594	1
Rab5	chr2L:2364303-2364371	0.173532	0.0072836	0.184098	0.808772	0.0560921	1
CG3164	chr2L:128800-128942	0.711157	0.0072931	0.706299	0.829599	0.0561127	1
CG42330	chr3L:8273860-8274251	0.418521	0.00729912	0.541291	0.810742	0.056119	1
CG31619	chr2L:21684546-21684911	0.999379	0.00730095	0.808281	0.865708	0.0561302	1
CG7888	chr3L:11048641-11048953	0.18806	0.00730422	0.435388	0.809032	0.0561575	1
Syt1	chr2L:2792482-2793269	0.586074	0.00731219	0.978452	0.81581	0.0561581	1
vlc	chr2R:1589799-1590317	0.259233	0.00731237	0.763958	0.809883	0.0561671	1
CG32048	chr3L:9574491-9574586	0.0979358	0.007315	0.821375	0.80619	0.0562204	1
Smr	chrX:12624963-12626433	0.263278	0.0073306	0.354796	0.809918	0.0562225	1
bwa	chr2L:20069053-20069304	0.145447	0.00733121	0.182686	0.808125	0.0562249	1
CG31619	chr2L:21684536-21684911	0.999337	0.00733192	0.806547	0.865703	0.056231	1
bwa	chr2L:20069048-20069304	0.14546	0.00733373	0.182716	0.808125	0.056253	1
Corin	chr2R:3448448-3449242	0.945183	0.00734015	0.527117	0.859093	0.0562911	1
mura	chr3R:5363823-5365012	0.823346	0.00735137	0.14601	0.841546	0.0563084	1
Syt1	chr2L:2780741-2782839	0.988096	0.00735646	0.334657	0.864383	0.0563087	1
Mbs	chr3L:16068574-16068864	0.722845	0.00735654	0.60435	0.830663	0.0563097	1
sbb	chr2R:14243005-14244766	0.0574833	0.00735683	0.0327081	0.802052	0.0564169	1
alph	chr3R:25423886-25424672	0.514654	0.00738844	0.757615	0.811003	0.0564391	1
Nmda1	chr2R:8764496-8765519	0.231381	0.00739501	0.441558	0.809612	0.0564502	1
Spt-I	chr2R:9056119-9056393	0.141343	0.00739831	0.221513	0.808009	0.0564715	1
Nmda1	chr2R:8764507-8765519	0.230714	0.0074046	0.442893	0.809605	0.0564804	1
pyd	chr3R:4653102-4654040	0.654436	0.00740725	0.617736	0.823944	0.0565457	1
Dscam3	chr3R:13300487-13300638	0.529945	0.00742663	0.902356	0.811036	0.0565639	1
CG31869	chr2L:10800679-10801107	0.10277	0.00743204	0.128129	0.806468	0.0565989	1
Rpn5	chr3R:1615127-1615432	0.254551	0.00744248	0.856011	0.809842	0.0566073	1
Rpn5	chr3R:1615125-1615432	0.254481	0.00744499	0.855993	0.809841	0.0566245	1
spz	chr3R:22892330-22892387	0.451133	0.00745012	0.63849	0.810843	0.0566423	1
heph	chr3R:27747355-27747396	0.618512	0.00745542	0.290666	0.819874	0.0566799	1
CG11299	chr2R:19601425-19601641	0.0750678	0.00746665	0.136444	0.804393	0.05668	1
CG11299	chr2R:19601413-19601641	0.0750666	0.00746669	0.136443	0.804393	0.0566803	1
CG11299	chr2R:19601344-19601641	0.075068	0.00746677	0.136446	0.804393	0.0567511	1
Paip2	chr3R:8806851-8807109	0.0232016	0.007488	0.0397686	0.787842	0.0567632	1
ssp4	chr2R:13412209-13412521	0.270624	0.00749163	0.0746899	0.809978	0.0567677	1
Tm1	chr3R:11133312-11133699	0.213294	0.00749297	0.138238	0.809398	0.0568314	1
nudE	chr3L:9893861-9893986	0.405752	0.00751212	0.467658	0.810698	0.0568574	1
Nmda1	chr2R:8764596-8765519	0.231621	0.00751996	0.444812	0.809615	0.056898	1
CG12004	chr3L:1574988-1576354	0.901633	0.00753224	0.940141	0.853286	0.056915	1
SKIP	chr3R:18119181-18121385	0.00703912	0.00753735	0.504718	0.75181	0.056915	1
CG3655	chrX:1028218-1028591	0.692447	0.00753737	0.902377	0.827828	0.0569242	1
Sema-2a	chr2R:12403829-12403892	0.611077	0.00754015	0.350077	0.818977	0.0569285	1
spz	chr3R:22891821-22891950	0.149744	0.00754144	0.0627793	0.808239	0.0569643	1
Spred	chr2R:10650424-10650513	0.393325	0.00755228	0.32282	0.810652	0.0569716	1
fru	chr3R:14261365-14261512	0.531499	0.0075545	0.258436	0.811039	0.0569822	1
Mitf	chr4:1225948-1226275	0.0577105	0.00755772	0.0508499	0.802091	0.0569854	1
Mitf	chr4:1225948-1226293	0.0622848	0.00755867	0.0626228	0.802821	0.0569912	1
ine	chr2L:4476935-4477024	0.0344581	0.00756043	0.100797	0.795448	0.0570177	1
chrb	chr3L:11481436-11481701	0.112689	0.00756847	0.307906	0.806964	0.0570735	1
for	chr2L:3638939-3640517	0.00580383	0.00758545	0.0582926	0.74145	0.0571073	1
CG9153	chr3L:1314158-1314335	0.366211	0.00759574	0.430836	0.810542	0.0571221	1
14-3-3zeta	chr2R:5994972-5996959	0.437036	0.00760026	0.196082	0.810801	0.0571286	1
Ect3	chr3R:7828020-7829360	0.155171	0.00760224	0.120874	0.808375	0.0571859	1
CG4238	chr2L:2028303-2029028	0.616974	0.00761977	0.740736	0.81969	0.0572177	1
Sug	chr3L:11681252-11681444	0.119263	0.00762952	0.0675135	0.807248	0.0572712	1
Camta	chr2R:5345153-5346262	0.149723	0.00764591	0.478565	0.808239	0.0572828	1
CG1910	chr3R:27576367-27576854	0.643833	0.00764947	0.409213	0.822786	0.0573126	1
pyd	chr3R:4653200-4654040	0.638306	0.00765866	0.604441	0.822168	0.0573142	1
Pka-R2	chr2R:5884467-5885056	0.382857	0.00765915	0.760253	0.810612	0.0573232	1
Paip2	chr3R:8806755-8807109	0.0231264	0.00766192	0.035384	0.787788	0.0574154	1
Hsc70Cb	chr3L:14030581-14030850	0.692054	0.00769036	0.330234	0.82779	0.0574188	1
ia2	chr2L:1009182-1014484	0.71177	0.00769141	0.0899145	0.829656	0.0574196	1
gish	chr3R:12098176-12098221	0.204053	0.00769166	0.271877	0.809275	0.0574492	1
Arp14D	chrX:16447814-16448025	0.26413	0.00770084	0.849487	0.809925	0.057453	1
ia2	chr2L:1008348-1014484	0.711763	0.007702	0.0897657	0.829655	0.0574601	1
Pka-R2	chr2R:5913355-5913595	0.230703	0.0077042	0.764775	0.809605	0.0574603	1
Pka-R2	chr2R:5913355-5913526	0.230703	0.00770427	0.764775	0.809605	0.0574604	1
Pka-R2	chr2R:5913355-5913540	0.230702	0.00770429	0.764773	0.809605	0.0574725	1
Rad23	chr4:329275-329705	0.819489	0.00770805	0.275811	0.840919	0.0574867	1
ia2	chr2L:1008940-1014484	0.712016	0.00771245	0.0898551	0.829679	0.0575294	1
Mnn1	chr2L:7057224-7057674	0.414062	0.00772571	0.396801	0.810727	0.0575725	1
Cortactin	chr3R:16887402-16889056	0.805775	0.00773913	0.401611	0.839384	0.0575891	1
stj	chr2R:9704260-9704484	0.495558	0.00774429	0.0875833	0.810959	0.0576133	1
Cortactin	chr3R:16887397-16889056	0.805068	0.00775184	0.402219	0.839311	0.0576228	1
CG6330	chr3R:22782242-22782311	0.139567	0.00775482	0.30405	0.807956	0.0576929	1
puc	chr3R:3931057-3931817	0.107752	0.00777675	0.146306	0.806728	0.0576944	1
RhoGEF2	chr2R:12914680-12914833	0.679494	0.00777721	0.729836	0.826549	0.0577057	1
Pka-R2	chr2R:5913355-5913677	0.231919	0.00778074	0.762197	0.809618	0.0577061	1
Pka-R2	chr2R:5913355-5913687	0.231923	0.00778086	0.7622	0.809618	0.0577066	1
Pka-R2	chr2R:5913355-5913656	0.231922	0.00778104	0.7622	0.809618	0.0577153	1
Ext2	chr2R:12036431-12037121	0.306438	0.00778377	0.352031	0.810231	0.0577316	1
CG14164	chr3L:9886283-9886564	0.765599	0.00778887	0.941224	0.835062	0.0577352	1
gw	chr4:680271-680614	0.32522	0.00779	0.394376	0.810341	0.0577485	1
Gpdh	chr2L:5947857-5948574	0.8482	0.00779417	0.237966	0.845471	0.0578083	1
cenB1A	chr3R:18946183-18946276	0.411236	0.00781298	0.534151	0.810717	0.0578135	1
Tm1	chr3R:11133312-11133702	0.212067	0.0078146	0.135419	0.809383	0.0578188	1
Cp190	chr3R:11099837-11101007	0.673247	0.0078163	0.347401	0.825916	0.05782	1
Rapgap1	chr2L:7543983-7544423	0.867114	0.00781665	0.487623	0.848331	0.0578201	1
puc	chr3R:3930956-3931817	0.108358	0.00781668	0.146155	0.806758	0.0578265	1
CG17698	chr3L:23741051-23741160	0.790686	0.00781872	0.519081	0.837807	0.0578791	1
CG18769	chr3L:6543822-6543922	0.940178	0.00783462	0.236842	0.858449	0.0579498	1
CG3198	chrX:6562570-6566212	0.930136	0.00785608	0.374764	0.857139	0.0579515	1
ia2	chr2L:1009646-1014484	0.713525	0.00785662	0.0897175	0.829818	0.0580367	1
Uhg5	chr2R:10509983-10510036	0.365161	0.00788255	0.676933	0.810538	0.058039	1
Cda5	chr2L:59190-60097	0.168061	0.00788325	0.800337	0.808663	0.0581748	1
Taf4	chr3L:16113014-16114468	0.699682	0.00792482	0.193528	0.828523	0.0582821	1
CG8788	chr2R:5026599-5026773	0.43628	0.00795782	0.208751	0.810799	0.0583186	1
rab3-GEF	chrX:14991672-14992798	0.0606625	0.00796909	0.00493465	0.802575	0.0583722	1
14-3-3zeta	chr2R:5994972-5996905	0.43625	0.00798568	0.200319	0.810799	0.0583737	1
Dap160	chr2L:21138113-21138361	0.610847	0.00798611	0.635002	0.818949	0.0583744	1
CG4272	chr2L:2365724-2365901	0.741293	0.00798634	0.311391	0.832358	0.0583986	1
Gpdh	chr2L:5947488-5947629	0.515944	0.00799383	0.309923	0.811006	0.0584594	1
Sh	chrX:17836815-17837005	0.550531	0.0080127	0.769332	0.811077	0.0584955	1
Mbs	chr3L:16073859-16075126	0.77529	0.00802395	0.18187	0.836142	0.0584956	1
Mbs	chr3L:16073859-16075130	0.77529	0.00802396	0.181868	0.836142	0.0584957	1
Mbs	chr3L:16073859-16075133	0.775291	0.00802399	0.181871	0.836142	0.0584957	1
Mbs	chr3L:16073859-16075084	0.775288	0.00802401	0.181869	0.836141	0.058496	1
Mbs	chr3L:16073859-16075128	0.775289	0.00802408	0.181873	0.836142	0.0584961	1
Mbs	chr3L:16073859-16075131	0.775289	0.00802411	0.181871	0.836142	0.058501	1
CG2225	chr2L:21677499-21677671	0.102925	0.00802563	0.762014	0.806476	0.0585197	1
Pde11	chr2L:18562824-18563218	0.0337917	0.00803146	0.17491	0.795126	0.0586061	1
fru	chr3R:14261365-14261529	0.542309	0.00805844	0.264405	0.811061	0.058686	1
l(2)s5379	chr2L:2229878-2231157	0.00342855	0.00808346	0.144692	0.703193	0.0587147	1
CG14591	chr2R:1923971-1924909	0.323989	0.00809249	0.608908	0.810334	0.0587247	1
CG16833	chr2L:10997335-10997425	0.0438159	0.00809561	0.113007	0.798956	0.058765	1
scny	chr3L:5767514-5768113	0.411609	0.00810831	0.958048	0.810718	0.0587789	1
flw	chrX:10279965-10280069	0.0319948	0.00811269	0.117603	0.794191	0.0587815	1
Mbs	chr3L:16073859-16075246	0.776601	0.0081135	0.180661	0.836286	0.0588017	1
Eaat1	chr2L:9337809-9337833	0.11921	0.00811985	0.908076	0.807246	0.0588152	1
l(2)s5379	chr2L:2229878-2231065	0.00344821	0.00812414	0.145327	0.703699	0.0588268	1
CG14591	chr2R:1924046-1924909	0.322852	0.00812777	0.609741	0.810328	0.0588652	1
Dap160	chr2L:21138113-21138358	0.603704	0.00813992	0.639737	0.818068	0.0588692	1
CG34133	chr3R:25700133-25700685	0.958627	0.00814118	0.166163	0.860794	0.0588825	1
CG34133	chr3R:25700133-25700884	0.975401	0.00814539	0.154893	0.86286	0.0589055	1
CG13185	chr2R:7764409-7765798	0.159723	0.00815267	0.322812	0.808482	0.0589107	1
CG14591	chr2R:1924063-1924909	0.322565	0.00815431	0.609608	0.810326	0.0589141	1
CG15894	chrX:6211497-6211774	0.154881	0.0081554	0.625807	0.808368	0.0589626	1
CG3999	chr3R:6080703-6081002	0.0459397	0.00817079	0.0331361	0.799556	0.0589661	1
CG30492	chr2R:3537816-3538313	0.901014	0.00817191	0.699592	0.8532	0.0589862	1
As	chr3L:11199414-11200235	0.323067	0.00817828	0.655799	0.810329	0.0590181	1
Vrp1	chr2R:17998051-17998443	0.277912	0.00818842	0.030947	0.810035	0.0590695	1
Rpn6	chr2R:10640298-10640415	0.661969	0.00820484	0.0740974	0.824746	0.0590798	1
Nup153	chrX:16493272-16494346	0.239371	0.00820811	0.0703215	0.809697	0.0591038	1
slmb	chr3R:16952660-16953277	0.472824	0.00821577	0.175671	0.810903	0.0591041	1
slmb	chr3R:16952660-16953202	0.472824	0.00821588	0.175673	0.810903	0.0591049	1
14-3-3zeta	chr2R:5994972-5996464	0.422173	0.00821614	0.220339	0.810754	0.0591059	1
CG34133	chr3R:25700133-25701024	0.976527	0.00821646	0.160498	0.862996	0.0591079	1
Gap1	chr3L:9832733-9834663	0.379902	0.0082171	0.418606	0.8106	0.059193	1
eas	chrX:16174919-16175306	0.520723	0.00824433	0.895588	0.811016	0.059197	1
shot	chr2R:9803136-9803236	0.328786	0.00824561	0.301352	0.81036	0.0592619	1
Mbs	chr3L:16059285-16059413	0.839727	0.00826647	0.829097	0.844155	0.0592654	1
Cda5	chr2L:59190-60106	0.188252	0.0082676	0.804263	0.809035	0.0592682	1
vlc	chr2R:1589610-1589798	0.368059	0.00826851	0.155425	0.81055	0.0592699	1
vlc	chr2R:1589612-1589798	0.368065	0.00826904	0.155433	0.81055	0.0592756	1
wdb	chr3R:23406802-23407089	0.0269194	0.0082709	0.0290608	0.790928	0.0592823	1
14-3-3zeta	chr2R:5994972-5996471	0.424609	0.00827306	0.220455	0.810762	0.0592841	1
CG6981	chr3L:20181781-20181862	0.533003	0.00827362	0.00726723	0.811042	0.0592892	1
Mbs	chr3L:16063220-16063364	0.00711368	0.00827527	0.0384782	0.752328	0.0593233	1
mura	chr3R:5363817-5365012	0.807872	0.00828627	0.148162	0.839599	0.059352	1
CG10089	chr3L:13459159-13459988	0.670003	0.00829554	0.380652	0.825583	0.0594036	1
ap	chr2R:1594729-1595611	0.470763	0.00831221	0.997089	0.810897	0.059406	1
As	chr3L:11199522-11200235	0.324219	0.00831299	0.658957	0.810335	0.0594724	1
lig	chr2R:3955719-3955787	0.0709281	0.00833454	0.538664	0.803946	0.0595024	1
slim	chr2R:14328298-14329818	0.0950691	0.00834429	0.474492	0.806011	0.059518	1
Plip	chr3R:19584040-19584250	0.0275918	0.00834938	0.0196903	0.791423	0.0595689	1
CG18815	chr3L:11623330-11623849	0.0332698	0.00836596	0.0283498	0.794865	0.059569	1
CG17841	chrX:10276615-10277613	0.25175	0.008366	0.231376	0.809816	0.0595827	1
Pka-R2	chr2R:5884453-5885056	0.38281	0.00837047	0.758603	0.810611	0.0595974	1
CG17698	chr3L:23741240-23741392	0.688799	0.00837526	0.2953	0.827472	0.059603	1
CG7059	chr3R:18215349-18215795	0.394137	0.00837709	0.291983	0.810655	0.0596554	1
zip	chr2R:20885101-20885220	0.620424	0.00839423	0.851796	0.820101	0.0596918	1
Taf4	chr3L:16113014-16114579	0.701791	0.00840614	0.19535	0.828724	0.0597271	1
Tm1	chr3R:11133312-11133722	0.221313	0.00841776	0.141908	0.809498	0.0597309	1
Csk	chr3R:7463557-7463606	0.296669	0.00841899	0.472395	0.810168	0.0597447	1
Btk29A	chr2L:8261324-8261681	0.678846	0.00842351	0.292782	0.826484	0.0597504	1
slim	chr2R:14328462-14328937	0.0944511	0.0084254	0.47688	0.805972	0.0597544	1
Taf4	chr3L:16113014-16114713	0.701515	0.0084267	0.195433	0.828697	0.0597545	1
Taf4	chr3L:16113014-16114751	0.701518	0.00842675	0.195433	0.828698	0.0597991	1
Rapgap1	chr2L:7497798-7499180	0.578529	0.00844145	0.352013	0.814806	0.0597992	1
Rapgap1	chr2L:7497805-7499180	0.578529	0.00844148	0.352013	0.814806	0.0598008	1
Ca-P60A	chr2R:19816640-19816954	0.548207	0.00844199	0.220549	0.811073	0.0598888	1
wdb	chr3R:23405879-23406047	0.0312615	0.00846781	0.175846	0.79378	0.0599089	1
CG10089	chr3L:13467397-13467643	0.196172	0.00847371	0.245296	0.80916	0.0599702	1
n-syb	chr3L:1632193-1632454	0.783138	0.00849177	0.117622	0.836998	0.0600109	1
gfA	chrX:19236452-19236632	0.624224	0.00850378	0.75574	0.820549	0.0600247	1
NTPase	chr2L:2882692-2882833	0.209963	0.00850786	0.190809	0.809355	0.0600935	1
CG9062	chr2R:7167919-7168655	0.921683	0.00852817	0.0435712	0.856018	0.0601562	1
CG5445	chrX:17196499-17197423	0.56135	0.00854676	0.921156	0.812429	0.0601579	1
Pur-alpha	chr4:578086-578121	0.485255	0.00854728	0.207385	0.810934	0.0601608	1
CG31116	chr3R:7623840-7623869	0.622708	0.00854812	0.998784	0.820371	0.0601681	1
cno	chr3R:1010001-1010245	0.642181	0.0085503	0.771634	0.822602	0.0602113	1
Gap1	chr3L:9832175-9834663	0.368473	0.00856312	0.418538	0.810552	0.0602296	1
CG5065	chr2R:12499419-12499487	0.0257567	0.00856858	0.0255374	0.790012	0.0602724	1
CG8788	chr2R:5026417-5026773	0.437149	0.00858131	0.165708	0.810801	0.0602735	1
CG8788	chr2R:5026443-5026773	0.437172	0.00858165	0.165731	0.810802	0.0602812	1
SNF4Agamma	chr3R:17024844-17025053	0.109152	0.00858394	0.380581	0.806797	0.0603305	1
CG16940	chr3L:212275-212307	0.0901249	0.00859865	0.143313	0.805678	0.0603506	1
CG34133	chr3R:25700133-25700928	0.9744	0.00860465	0.158384	0.862738	0.0603517	1
Plip	chr3R:19583898-19584250	0.0280236	0.00860498	0.0197828	0.791729	0.0603607	1
lig	chr2R:3963365-3963607	0.117487	0.00860765	0.352791	0.807174	0.0604001	1
Nrx-IV	chr3L:12149151-12150178	0.307959	0.00861943	0.0817323	0.81024	0.060403	1
SKIP	chr3R:18119181-18121429	0.0094479	0.00862032	0.537285	0.764609	0.060483	1
CG5549	chr2R:19725094-19725338	0.273404	0.00864221	0.157135	0.81	0.0605186	1
tkv	chr2L:5236336-5237382	0.955824	0.00865198	0.53003	0.860443	0.0605507	1
B52	chr3R:9487191-9487581	0.263456	0.00866078	0.428459	0.80992	0.0605657	1
Picot	chr2R:12542813-12543477	0.263584	0.0086649	0.250835	0.809921	0.0606071	1
Glut1	chr3L:982175-982297	0.557781	0.00867628	0.918246	0.811919	0.060674	1
CG31530	chr3R:579015-579091	0.682221	0.00869472	0.485559	0.826822	0.0606753	1
Picot	chr2R:12542786-12543477	0.262511	0.00869506	0.250265	0.809912	0.0606906	1
CG8468	chr2R:10108092-10108270	0.136473	0.0086993	0.167531	0.807862	0.0607258	1
CG12004	chr3L:1574988-1575753	0.975977	0.00870899	0.925425	0.862929	0.0607527	1
CG32529	chrX:19760667-19761199	0.247144	0.00871643	0.220503	0.809773	0.0608328	1
CG5098	chr2R:13987180-13988576	0.185942	0.00873859	0.0920914	0.808996	0.0608346	1
CG5098	chr2R:13987180-13988618	0.185948	0.00873909	0.0920921	0.808996	0.0608619	1
chico	chr2L:10247025-10247062	0.805857	0.00874667	0.237032	0.839393	0.0609206	1
unc-104	chr2R:12640270-12641042	0.989401	0.00876295	0.49076	0.864537	0.0609659	1
trol	chrX:2390809-2390958	0.0927679	0.00877555	0.0235907	0.805861	0.0610099	1
Nrg	chrX:8444116-8444756	0.703677	0.00878777	0.295289	0.828902	0.061049	1
Acf1	chr3R:27621993-27623460	0.0543784	0.00879868	0.56344	0.801484	0.0610979	1
CG34309	chr3R:9197961-9198480	0.580264	0.00881232	0.410747	0.815039	0.0611443	1
CG14207	chrX:19503496-19503522	0.927608	0.00882529	0.794651	0.856806	0.0611565	1
Lmpt	chr3L:16884327-16884350	0.738085	0.00882872	0.26244	0.832051	0.0611583	1
chic	chr2L:5980559-5980627	0.180039	0.0088292	0.515454	0.808894	0.0611846	1
CG17839	chr3L:14874445-14874973	0.410031	0.00883656	0.393004	0.810713	0.0612031	1
Src64B	chr3L:4594228-4595255	0.238154	0.00884175	0.542729	0.809684	0.061209	1
gw	chr4:680504-680614	0.304319	0.00884341	0.346268	0.810217	0.0613503	1
CG31145	chr3R:19461000-19461043	0.191878	0.00888169	0.106143	0.809093	0.061372	1
CG13800	chr3L:2402555-2408629	0.126068	0.00888759	0.41961	0.80751	0.0613998	1
Pur-alpha	chr4:578053-578121	0.474387	0.00889513	0.214053	0.810907	0.0614152	1
LIMK1	chrX:12483874-12484517	0.491512	0.00889933	0.57482	0.81095	0.0614209	1
lig	chr2R:3963798-3963953	0.231014	0.00890087	0.786475	0.809608	0.0614907	1
CG34133	chr3R:25700133-25701081	0.991885	0.00891989	0.179439	0.864831	0.0615103	1
CG15111	chr2R:15026646-15026854	0.0214944	0.00892523	0.830421	0.786538	0.0615291	1
CG12004	chr3L:1573994-1576330	0.897008	0.00893035	0.89805	0.85264	0.0615783	1
CG13800	chr3L:2402555-2409096	0.121289	0.0089438	0.383855	0.807329	0.0615958	1
Gs2	chrX:11320061-11320129	0.589471	0.00894858	0.418786	0.816255	0.061624	1
Xrp1	chr3R:14745145-14745234	0.167083	0.00895628	0.0875514	0.808643	0.0618135	1
CG11000	chr3R:1633540-1634176	0.777566	0.00900829	0.751993	0.836392	0.0619125	1
wdb	chr3R:23406866-23407089	0.0173851	0.00903557	0.021587	0.782378	0.0619208	1
Mbs	chr3L:16073859-16074854	0.768143	0.00903785	0.191045	0.835348	0.0619599	1
CG32529	chrX:19760207-19761199	0.290953	0.00904865	0.223501	0.810129	0.0619808	1
Msp-300	chr2L:5121676-5121948	0.707884	0.00905442	0.884496	0.829296	0.0620189	1
cni	chr2L:16309452-16309930	0.908848	0.00906494	0.358188	0.854281	0.0620592	1
E(bx)	chr3L:239055-239185	0.166893	0.00907612	0.644241	0.808639	0.0620934	1
CG3655	chrX:1028218-1028996	0.668471	0.0090856	0.914838	0.825425	0.0621153	1
gw	chr4:680186-680614	0.363315	0.00909168	0.442115	0.810529	0.0621507	1
ed	chr2L:4113621-4115767	0.637384	0.00910151	0.77598	0.822064	0.0621741	1
CtBP	chr3R:8845064-8845536	0.725488	0.00910802	0.379885	0.830899	0.0621831	1
pUf68	chr3L:1499043-1499337	0.508785	0.00911051	0.477075	0.81099	0.0622025	1
ctp	chrX:4581834-4582061	0.185611	0.0091159	0.00402007	0.808991	0.062244	1
plexA	chr4:1042868-1044306	0.393776	0.00912746	0.257233	0.810654	0.0622633	1
unc-5	chr2R:11249488-11249805	0.303796	0.00913282	0.879001	0.810214	0.0623798	1
CG34394	chr2L:3358624-3360928	0.67624	0.00916536	0.361588	0.826221	0.062432	1
flfl	chr3R:9515975-9516108	0.529946	0.00917995	0.384509	0.811036	0.0624621	1
Nedd8	chr2L:18951417-18951537	0.099261	0.0091884	0.0139768	0.806268	0.0624814	1
CG34394	chr2L:3358635-3360928	0.67672	0.0091938	0.362033	0.826269	0.0624814	1
CG34394	chr2L:3358640-3360928	0.676713	0.00919382	0.362034	0.826269	0.0625618	1
[truncated: 3,767 more rows]
