# Supplementary material for: Deep sequencing the circadian and diurnal transcriptome ofDrosophilabrain
Source: HighWire-hosted journal article supplement (doi:10.1101/gr.128876.111), 2012-04-03
Supplement: Table_S15.xlsx [file Table_S15.xlsx]

## Sheet: Sheet1
			ANOVA statistics						Cycling Statistics								Editing Ratios (# edited / (# edited + # unedited))
GeneSymbol	Arm	Coordinate	Time p-value	Genotype p-value	Interaction p-value	Time q-value	Genotype q-value	Interaction q-value	JTK p-value	JTK q-value	JTK Period	JTK Lag	JTK Amplitude	FG p-value	FG q-value	FG Period	WT_ZT0_rep1	WT_ZT6_rep1	WT_ZT12_rep1	WT_ZT18_rep1	WT_ZT0_rep2	WT_ZT6_rep2	WT_ZT12_rep2	WT_ZT18_rep2	Per_ZT0_rep1	Per_ZT6_rep1	Per_ZT12_rep1	Per_ZT18_rep1	Per_ZT0_rep2	Per_ZT6_rep2	Per_ZT12_rep2	Per_ZT18_rep2
retinophilin	3R	1062097	0.199395	7.92131e-14	0.235663	0.891399	2.18017e-11	1	0.715476	1	24	18	0.0212576	0.928348	1	16	0.660356	0.665244	0.690419	0.721191	0.689337	0.708026	0.683483	0.712653	0.00100536	0.000204625	0.00125313	0.00203379	0.00115009	0.00205646	0.00168848	0.00246046
retinophilin	3R	1062100	0.0161868	8.01652e-13	0.0177675	0.399875	1.10385e-10	1	0.244048	1	24	3	0.0341646	0.844945	1	12	0.509872	0.480159	0.432367	0.431843	0.489221	0.501496	0.445023	0.467206	0.0028222	0.00132051	0.00092614	0.00116262	0.000537924	0.00161088	0.00161976	0.000675904
CG31149	3R	14797034	0.575824	5.32817e-11	0.315698	0.95952	4.8907e-09	1	0.715476	1	24	1.5	0.0079793	0.0921038	1	24	0.180095	0.176962	0.150461	0.160659	0.178618	0.12963	0.156836	0.110643	0.720946	0.795587	0.778243	0.765265	0.764286	0.737438	0.799839	0.741715
CG10077	3L	6942790	0.91371	1.47582e-07	0.787341	0.974102	1.01851e-05	1	1	1	24	16.5	9.81308e-18	0.413344	1	16	0.169399	0.170915	0.168489	0.171345	0.171839	0.171923	0.178739	0.176079	0.279807	0.312329	0.287187	0.291149	0.302251	0.270632	0.266901	0.280982
Ggamma30A	2L	9256786	0.00251509	1.48955e-06	0.0375281	0.292219	6.85287e-05	1	1	1	24	13.5	0.000913986	0.267987	1	48	0.027027	0.0467422	0.0308219	0.0493274	0.0319554	0.0415498	0.0299709	0.0452436	0.0151086	0.0166436	0.0101095	0.0184019	0.0153283	0.0137212	0.0186599	0.0241617
CG33472	2R	7335492	0.124053	1.50399e-06	0.0976189	0.836242	6.88185e-05	1	1	1	24	4.5	0.00334821	0.701684	1	12	0.313725	0.467105	0.304255	0.369565	0.292	0.3663	0.238411	0.293362	0.0648801	0.0912052	0.0917431	0.0928793	0.0950226	0.0970266	0.122483	0.0650407
Ggamma1	2R	4791185	0.847989	1.02116e-05	0.259039	0.97215	0.000401114	1	1	1	24	13.5	0.00765275	0.461708	1	48	0.260081	0.253401	0.281726	0.275578	0.26773	0.259714	0.268908	0.236967	0.203554	0.184382	0.184801	0.218942	0.2	0.198516	0.174632	0.184874
Nckx30C	2L	9717614	0.119021	2.08607e-05	0.215223	0.830492	0.000719153	1	0.434722	1	24	1.5	0.00317225	0.848993	1	24	0.917582	0.883978	0.894459	0.89295	0.911475	0.906404	0.890183	0.906071	0.804067	0.755056	0.835526	0.854	0.809628	0.763258	0.755448	0.822485
nAcRbeta-64B	3L	4432486	0.0858889	5.33409e-05	0.431322	0.779521	0.00148934	1	1	1	24	7.5	0.0115575	0.829936	1	12	0.553743	0.549356	0.520402	0.516667	0.527926	0.496124	0.5482	0.533193	0.464245	0.427105	0.486049	0.452652	0.485007	0.409567	0.464531	0.422939
DIP1	X	21500753	0.0877074	5.58648e-05	0.333275	0.7831	0.00153878	1	0.715476	1	24	19.5	0.00658992	0.52282	1	24	0.318395	0.26873	0.337034	0.296719	0.345255	0.283582	0.343434	0.362793	0.250551	0.220073	0.250726	0.251994	0.223176	0.237571	0.229863	0.252678
CG9636	3R	4067757	0.170673	0.000172178	0.172845	0.8754	0.00388913	1	0.244048	1	24	1.5	0.0414117	0.959252	1	12	0.431507	0.151163	0.253086	0.268293	0.325301	0.29932	0.23389	0.278287	0.116694	0.137124	0.127563	0.126543	0.128767	0.113014	0.103982	0.147766
CG33472	2R	7335106	0.390388	0.000174178	0.437384	0.941418	0.0039222	1	1	1	24	13.5	0.00482081	0.670617	1	12	0.829499	0.748728	0.815864	0.822196	0.834335	0.824528	0.836819	0.835284	0.747078	0.749027	0.738268	0.774257	0.746086	0.739808	0.727315	0.736176
CG16974	2L	13187842	0.490687	0.000215417	0.490687	0.952828	0.00456144	1	1	1	24	13.5	NA	0.832378	1	16	0	0	0	0	0	0	0	0	0.8	0.2	0.25	0.666667	0.4	0.666667	0.428571	0.666667
DIP1	X	21496883	0.932993	0.00029754	0.894659	0.974623	0.00568256	1	0.575099	1	24	18	0.138648	0.447118	1	12	0	0	0	0.0980392	0	0	0	0.012987	0.428571	0.295455	0.25	0.175439	0.15625	0.354839	0.277778	0.394737
CG1090	3R	191196	0.204967	0.000343982	0.149009	0.894038	0.00622436	1	0.0220238	1	24	9	0.0294133	0.0671018	1	24	0.457944	0.535714	0.527027	0.494118	0.473684	0.56701	0.503185	0.464052	0.387097	0.423077	0.365385	0.433333	0.37	0.363057	0.464567	0.448718
Ca-beta	2L	11159274	0.00323249	0.000485543	0.355443	0.292219	0.00757305	1	0.244048	1	24	21	0.00351046	1	1	48	0.304965	0.327273	0.3	0.416667	0.333333	0.276316	0.30531	0.3375	0.283951	0.223881	0.205263	0.305699	0.288973	0.205	0.208092	0.3125
DIP1	X	21500754	0.276279	0.000492014	0.27161	0.919178	0.00762585	1	0.715476	1	24	19.5	0.00146826	0.321907	1	12	0.376763	0.301794	0.37261	0.338802	0.350801	0.318097	0.365433	0.395701	0.291022	0.261473	0.285714	0.276916	0.258065	0.303191	0.25686	0.323084
sif	3L	5739872	0.0935964	0.000516175	0.374011	0.793935	0.0078173	1	0.715476	1	24	18	0.0257042	0.237352	1	24	0.184319	0.134969	0.22067	0.173387	0.202985	0.158249	0.187938	0.232715	0.140351	0.105485	0.139059	0.129237	0.149408	0.129268	0.116751	0.130548
CG7097	2R	15110884	0.381117	0.000618067	0.101603	0.940078	0.0085368	1	0.0220238	1	24	6	0.0190705	0.628824	1	24	0.19697	0.1875	0.17	0.0917431	0.232143	0.245902	0.168269	0.153846	0.086758	0.0731707	0.0777778	0.0618557	0.109005	0.0652174	0.101266	0.150943
DIP1	X	21500764	0.07597	0.000622138	0.168956	0.757709	0.00856292	1	1	1	24	13.5	0.0016548	0.608631	1	12	0.486719	0.316216	0.482039	0.393795	0.432619	0.374751	0.466818	0.483405	0.323628	0.285808	0.315183	0.320599	0.397849	0.332423	0.283478	0.340934
Cpn	3R	7990069	0.00411021	0.000902174	0.032399	0.292219	0.011548	1	0.907937	1	24	16.5	0.176777	0.88258	1	16	0	0.375	0.4	0.625	0	0.285714	0.125	0.6	0.0555556	0	0	0.0416667	0.0357143	0	0.037037	0.285714
slo	3R	20533145	0.00647713	0.00128977	0.398808	0.292219	0.0150509	1	0.0565476	1	24	21	0.0404061	0.85363	1	48	0.914286	0.777778	0.857143	0.896552	0.88	0.8	0.836735	0.902439	0.84	0.5	0.653846	0.820513	0.789855	0.655172	0.78125	0.777778
trpl	2R	5641401	0.00390586	0.00134738	0.0110383	0.292219	0.0155194	1	0.00694444	1	24	18	0.0226813	0.598706	1	12	0.0727273	0.0446927	0.0833333	0.104803	0.0595238	0.0075188	0.083871	0.115108	0.0487805	0.05	0.031746	0.0560748	0.046875	0.0272109	0.0111111	0.0540541
CG10077	3L	6943212	0.111196	0.0015297	0.299442	0.820703	0.0169253	1	1	1	24	10.5	0.0271934	0.803799	1	12	0.308271	0.517857	0.385185	0.323077	0.242991	0.412698	0.352	0.451327	0.181159	0.295652	0.246269	0.302083	0.225146	0.165468	0.223776	0.26
CG1513	2R	5771665	0.827724	0.00155217	0.369338	0.971488	0.0170909	1	1	1	24	7.5	0.00038852	0.737473	1	24	0.043956	0.108108	0.0428571	0.0689655	0.0882353	0.0277778	0.0361446	0.0294118	0.0754717	0.117647	0.138462	0.146552	0.146067	0.109091	0.130435	0.177778
stj	2R	9697112	0.0748378	0.00174368	0.253672	0.754941	0.0184611	1	1	1	24	13.5	0.0123796	0.965767	1	16	0.4	0.335366	0.364985	0.389381	0.353293	0.42268	0.369748	0.476998	0.333333	0.253731	0.297003	0.330357	0.373333	0.245455	0.294766	0.34375
NaCP60E	2R	20797921	0.135873	0.00249016	0.257704	0.848328	0.0243906	1	1	1	24	13.5	0.000416926	0.675768	1	16	0.129771	0.1875	0.15493	0.188679	0.166667	0.173913	0.151515	0.195946	0.0930233	0.0333333	0.148148	0.162162	0.100962	0.115108	0.103448	0.130435
CG7397	3R	13599939	0.0163909	0.00292392	0.0593898	0.402886	0.0274451	1	1	1	24	7.5	0.0785674	0.288181	1	12	0.6	1	0.25	0.777778	0.75	1	0.5	1	0.181818	0	0.4	0.6	0.363636	0.230769	0	1
CG14142	3L	11168876	0.357357	0.00311942	0.586436	0.936348	0.0287401	1	0.575099	1	24	7.5	0.164992	0.0769384	1	16	0.454545	0.333333	0.333333	0.1	0.111111	0.666667	0.130435	0.294118	0	0	0	0	0	0.0833333	0	0
Gpdh	2L	5944117	0.0100002	0.00343301	0.0453261	0.308739	0.0307205	1	1	1	24	16.5	NA	0.579157	1	12	0	0	0	0	0	0	0.0121951	0.0217391	0	0.0277778	0	0.0434783	0	0.0357143	0.0232558	0.0555556
CG4825	3L	20516600	0.0140863	0.0037409	0.0786278	0.367031	0.0325571	1	0.0220238	1	24	18	0.0495454	0.195734	1	24	0.253165	0.0697674	0.323232	0.306931	0.192308	0.112245	0.284091	0.441558	0.203704	0.104575	0.197183	0.183333	0.111111	0.0727273	0.112676	0.0909091
CG10077	3L	6942788	0.972617	0.0044956	0.204766	0.975632	0.0366596	1	0.244048	1	24	18	1.48634e-05	0.29175	1	24	0.209155	0.22039	0.210182	0.220411	0.20104	0.197723	0.217977	0.226713	0.23977	0.250683	0.243253	0.215536	0.235484	0.225729	0.227866	0.23117
DIP1	X	21500455	0.454836	0.00469622	0.7633	0.949298	0.0376646	1	1	1	24	13.5	0.0498189	0.796662	1	16	0.204545	0.111111	0.2	0.272727	0.18	0.3	0.188679	0.307692	0.102941	0.0784314	0.0120482	0.0666667	0.115942	0.12766	0.123711	0.166667
mAcR-60C	2R	20272335	0.888748	0.0047399	0.742835	0.973394	0.0378791	1	1	1	24	10.5	3.9465e-17	0.715465	1	24	0.864111	0.889535	0.84375	0.875283	0.779783	0.84186	0.831034	0.85209	0.78963	0.690678	0.788122	0.79604	0.735426	0.805271	0.762918	0.740741
nrv1	2L	6779407	0.0443341	0.00529181	0.635974	0.646017	0.0404622	1	0.124603	1	24	21	0.179825	0.0400492	1	24	0.37931	0.125	0.157895	0.413793	0.266667	0.368421	0.333333	0.55	0	0.153846	0	0.368421	0	0.0555556	0.173913	0.222222
Msp-300	2L	5184866	0.00254732	0.00543309	0.0115395	0.292219	0.041088	1	0.715476	1	24	16.5	0.0185733	0.601658	1	24	0.515789	0.305263	0.542056	0.466019	0.4375	0.326087	0.539171	0.487805	0.427861	0.308511	0.357143	0.408046	0.53125	0.330986	0.279762	0.377358
Tab2	2R	15191190	0.334164	0.00564607	0.443097	0.93223	0.0420058	1	0.0565476	1	24	9	0.127705	1	1	48	0.384615	0.565217	0.682927	0.432432	0.612903	0.692308	0.47619	0.375	0.32	0.3125	0.4375	0.16	0.275862	0.210526	0.4	0.428571
CG33205	3L	9826469	0.439647	0.00662752	0.0230117	0.947638	0.046697	1	0.184325	1	24	6	0.206239	0.732418	1	16	0.444444	0.625	0.333333	0	0.5	0.5	0.666667	0.142857	0.1	0.0714286	0	0.217391	0	0.111111	0.333333	0.384615
MRP	2L	12724493	0.428517	0.00690599	0.0558651	0.946351	0.0479389	1	1	1	24	7.5	0.0031511	0.28525	1	12	0.147059	0.151515	0.0869565	0.147059	0.0714286	0.153846	0.030303	0.130435	0	0	0.139535	0.030303	0	0.0697674	0.06	0.0769231
DopEcR	3L	4369184	0.231689	0.00706945	0.666675	0.9051	0.0486509	1	0.715476	1	24	21	0	0.769795	1	24	0.829191	0.673077	0.753028	0.648834	0.790398	0.736503	0.768786	0.797721	0.850206	0.780172	0.876777	0.834382	0.879587	0.826004	0.791014	0.896641
syt	2L	2785610	0.00988976	0.00939986	0.793839	0.30837	0.0594717	1	1	1	24	10.5	0	0.510147	1	16	0.515249	0.614243	0.510511	0.548585	0.504237	0.561785	0.545692	0.53973	0.487714	0.530758	0.474369	0.506186	0.492323	0.558789	0.516252	0.48708
Vap-33-1	X	3847324	0.639266	0.00962219	0.609852	0.96339	0.0604136	1	1	1	24	13.5	NA	0.329883	1	24	0	0	0	0	0	0	0	0.0357143	0.0943396	0.0847458	0.123457	0.157025	0.5	0.135417	0.190476	0.15625
stj	2R	9697467	0.0232965	0.0112193	0.0722098	0.489532	0.0667788	1	0.0565476	1	24	18	0.0606092	0.215558	1	12	0.285714	0.208333	0.371429	0.354839	0.238095	0.25	0.418605	0.5	0.295455	0.125	0.240741	0.22	0.295455	0.230769	0.272727	0.272727
ppl	3L	21274407	0.691488	0.0119244	0.406379	0.966061	0.0693827	1	1	1	24	16.5	0.0070261	0.222053	1	24	0.0408163	0.0882353	0.108108	0.0833333	0.0357143	0.0169492	0.038835	0.0576923	0.0153846	0.0217391	0	0.010989	0	0.0606061	0	0
nAcRbeta-64B	3L	4429963	0.314388	0.012259	0.725224	0.928272	0.0705782	1	0.0565476	1	24	15	0.024874	0.985062	1	12	0.84542	0.797814	0.880597	0.86014	0.834783	0.849741	0.877637	0.872131	0.790191	0.783394	0.842742	0.757709	0.844444	0.765957	0.777188	0.837838
Ca-beta	2L	11159899	0.127011	0.0130793	0.441215	0.839443	0.0734048	1	0.244048	1	24	15	0.00543928	0.013264	1	24	0.206107	0.192308	0.261261	0.2	0.144928	0.161765	0.252475	0.223176	0.149254	0.128571	0.196721	0.136752	0.155102	0.152778	0.13245	0.205128
rab3-GEF	X	14992625	0.0550571	0.0130878	0.207562	0.693852	0.0734334	1	0.907937	1	24	4.5	0.235702	0.371804	1	24	0.75	1	0.4	0.666667	0.5	1	0.166667	0.857143	0.333333	0.5	0.666667	0.25	0.285714	0.666667	0	0
slo	3R	20517215	0.86922	0.0144614	0.639735	0.972812	0.0778584	1	0.907937	1	24	21	0.0172934	0.199127	1	24	0.0869565	0.133333	0.0625	0.166667	0.0625	0	0.0526316	0.0666667	0	0	0.0416667	0	0.037037	0	0	0
DopEcR	3L	4369445	0.43342	0.0148669	0.364817	0.946926	0.0790968	1	1	1	24	10.5	0	0.507648	1	24	0.0991105	0.0812183	0.103192	0.0558912	0.104819	0.0910853	0.0930393	0.107739	0.0720399	0.0578854	0.0577617	0.0703593	0.0852535	0.0592525	0.0579505	0.0915301
CG33472	2R	7337822	0.296323	0.0157068	0.632194	0.924231	0.0815718	1	1	1	24	7.5	0.0344446	0.256837	1	24	0.632163	0.557173	0.534738	0.43462	0.578406	0.504979	0.59214	0.565453	0.492104	0.49702	0.525547	0.480156	0.481818	0.432432	0.463528	0.458795
CG31531	3R	528296	0.566082	0.015937	0.409024	0.958852	0.0822298	1	0.575099	1	24	13.5	0.0158905	0.712227	1	16	0.16129	0.24	0.254237	0.223529	0.209302	0.037037	0.283951	0.16129	0.381443	0.209677	0.265625	0.234694	0.369231	0.357143	0.289855	0.365385
CG6230	2L	11118462	0.924548	0.0160669	0.940593	0.974397	0.0825972	1	1	1	24	7.5	0.00106895	0.754646	1	24	0.00925926	0.0117647	0.0126582	0.00874126	0.00609756	0.00595238	0.00446429	0.00401606	0.0927835	0.0964467	0.12766	0.0763359	0.0227273	0.0197044	0.0384615	0.0298507
NAT1	2R	8808830	0.865403	0.0163658	0.193621	0.972695	0.0834325	1	0.715476	1	24	12	0.193613	0.768768	1	12	0.473684	0.666667	0.866667	0.392857	0.636364	0.47619	0.652174	0.655172	0.521739	0.285714	0.375	0.3125	0.485714	0.56	0.111111	0.416667
Shab	3L	2941426	0.716073	0.016368	0.669762	0.967188	0.0834386	1	1	1	24	7.5	0.00546884	0.453006	1	12	0.923077	0.972222	0.907609	0.938931	0.965217	0.920455	0.936275	0.946429	0.866667	0.887218	0.879725	0.930233	0.930636	0.872727	0.914163	0.90411
para	X	16365352	0.271559	0.0172542	0.468732	0.917889	0.0863568	1	0.244048	1	24	19.5	0.0195688	0.433677	1	48	0.385675	0.335802	0.351111	0.396067	0.326531	0.276995	0.351082	0.366372	0.418322	0.400839	0.420243	0.445701	0.631783	0.393013	0.40107	0.391677
para	X	16365262	0.349823	0.0186648	0.447076	0.935066	0.0908714	1	0.124603	1	24	4.5	0.0283619	0.143678	1	24	0.485222	0.51046	0.47035	0.439462	0.479624	0.479042	0.432127	0.460759	0.510453	0.488273	0.534091	0.5	0.540773	0.502825	0.458853	0.515358
CG42492	X	5525059	0.19164	0.0202291	0.548869	0.887498	0.0955984	1	1	1	24	7.5	0.00906547	0.240138	1	12	0.292308	0.555556	0.266667	0.481013	0.316667	0.364865	0.330144	0.341584	0.254237	0.354839	0.252747	0.300699	0.239782	0.233333	0.260417	0.24
crol	2L	11796346	0.123005	0.0224076	0.839539	0.835077	0.101738	1	0.339385	1	24	21	0.105929	0.311216	1	24	0.45933	0.309524	0.449275	0.449275	0.420732	0.43125	0.420513	0.492647	0.361111	0.351064	0.4375	0.414286	0.352201	0.298643	0.353659	0.363636
para	X	16399583	0.676622	0.0230416	0.180523	0.965341	0.103435	1	1	1	24	10.5	0.00589256	0.220749	1	16	0.75	0.733333	0.753247	0.821429	0.810811	0.925926	0.738462	0.901961	0.761194	0.75	0.71028	0.6875	0.789474	0.696429	0.733333	0.666667
DIP1	X	21496635	0.873989	0.0238331	0.884077	0.972956	0.105501	1	0.0565476	1	24	15	0.0183188	0.918831	1	16	0.004662	0	0.0320366	0.0259067	0	0.00699301	0.00904977	0.00699301	0.0772059	0.0408163	0.0613497	0.0392157	0.010989	0.0338346	0.0138889	0.0560748
Nhe3	2L	6682191	0.454941	0.0258243	0.173722	0.949309	0.110452	1	1	1	24	4.5	0.0412479	0.820106	1	48	0.416667	0.411765	0.25	0.3	0.285714	1	0.333333	0.3125	0.2	0.25	0.153846	0.333333	0.0769231	0	0.2	0.25
TfIIEalpha	3L	11676655	0.213208	0.0258831	0.170702	0.897715	0.110593	1	0.434722	1	24	13.5	0.0107137	0.154724	1	12	0	0.0909091	0.0833333	0.0606061	0	0	0.111111	0	0	0	0	0.0285714	0	0	0	0
GXIVsPLA2	3L	15949133	0.00654246	0.0259617	0.00624205	0.292219	0.110782	1	0.184325	1	24	0	0.0117851	0.426656	1	12	0.0833333	0	0	0.0166667	0.12	0	0.0294118	0.0322581	0	0.0294118	0	0.0217391	0.0322581	0.0263158	0	0
CG3508	3R	10485581	0.300525	0.0261966	0.569333	0.925211	0.111341	1	0.339385	1	24	4.5	0.0749962	0.680805	1	24	0.454545	0.333333	0.25	0.227273	0.32	0.391304	0.25	0.289474	0.285714	0.190476	0.142857	0.140625	0.037037	0.357143	0.26	0.125
Asx	2R	10395134	0.241399	0.026544	0.241399	0.908568	0.112161	1	1	1	24	13.5	NA	0.297636	1	12	0	0	0	0	0	0	0	0	0.1	0.2	0	0.111111	0	0.0909091	0	0
Shab	3L	2941396	0.207134	0.0291254	0.510333	0.89503	0.117963	1	0.124603	1	24	21	0.0294628	0.477855	1	48	0.657895	0.666667	0.60396	0.708333	0.645669	0.533981	0.70428	0.749035	0.589431	0.515385	0.607973	0.611429	0.568075	0.611111	0.643678	0.585185
para	X	16365298	0.436609	0.0300024	0.633433	0.947293	0.119826	1	1	1	24	10.5	0	0.804758	1	24	0.356974	0.359155	0.358261	0.333333	0.384279	0.34375	0.360856	0.391144	0.419903	0.40636	0.430921	0.476793	0.615819	0.404762	0.394737	0.364835
unc-13	4	895009	0.126086	0.0301969	0.392797	0.838456	0.120233	1	0.434722	1	24	3	0	0.798711	1	24	0.607527	0.691489	0.585714	0.781609	0.662791	0.606557	0.573529	0.593103	0.491979	0.412214	0.51626	0.620438	0.606061	0.503311	0.554054	0.686957
DIP1	X	21500480	0.521222	0.0307301	0.726534	0.955468	0.121333	1	1	1	24	13.5	0.00426362	0.0422597	1	24	0.261538	0.235294	0.255814	0.264706	0.123077	0.108108	0.174757	0.216867	0.0470588	0.185714	0.0849673	0.201613	0.118421	0.107143	0.115385	0.131579
CG1090	3R	191106	0.200567	0.0309877	0.72896	0.891965	0.121859	1	1	1	24	7.5	0.0119446	0.0538791	1	24	0.526316	0.594595	0.528302	0.510417	0.490196	0.661017	0.466216	0.551471	0.48913	0.590909	0.358491	0.451613	0.304348	0.364486	0.362637	0.552632
Ggamma1	2R	4791178	0.577421	0.0327675	0.561502	0.959627	0.125963	1	1	1	24	7.5	0.000904051	0.220974	1	12	0.0564374	0.0670732	0.0520548	0.0645161	0.081749	0.100629	0.0790191	0.0528634	0.0547264	0.0486258	0.0495356	0.0560191	0.0116279	0.0556586	0.0529915	0.0508475
ps	3R	5274244	0.082735	0.0332001	0.339351	0.773023	0.126932	1	1	1	24	13.5	0	0.826144	1	16	0.115174	0.18442	0.115822	0.182652	0.126794	0.15748	0.151389	0.195312	0.0954774	0.101761	0.0875912	0.134791	0.152824	0.123732	0.135965	0.155556
CG33472	2R	7337823	0.214256	0.0345534	0.574657	0.898164	0.130297	1	1	1	24	7.5	0.0260582	0.996413	1	12	0.595707	0.526	0.522003	0.422053	0.555838	0.458217	0.567073	0.536753	0.495	0.46327	0.514984	0.474125	0.46875	0.431833	0.442802	0.464738
Rbp9	2L	2961305	0.0646251	0.0361124	0.161817	0.726795	0.134335	1	0.184325	1	24	18	0.00785674	0.651254	1	12	0.00729927	0	0.0111111	0.0234375	0	0	0.00833333	0.00666667	0.0126582	0.027027	0.015748	0.0363636	0	0.0208333	0	0.0227273
nAcRbeta-64B	3L	4432487	0.243015	0.0383224	0.447	0.909121	0.140044	1	0.124603	1	24	19.5	0.0057386	0.69382	1	12	0.766859	0.724138	0.750628	0.763713	0.744	0.724675	0.748843	0.767687	0.694064	0.737166	0.75	0.725528	0.730263	0.712782	0.70595	0.755127
trio	3L	1027109	0.393283	0.0404113	0.314537	0.941824	0.145258	1	0.434722	1	24	9	3.92523e-17	0.528017	1	12	0.242424	0.357143	0.307692	0.409091	0.214286	0.466667	0.234568	0.113402	0.0967742	0.130435	0.285714	0.271605	0.137931	0.177778	0.21875	0.148936
CG33205	3L	9826470	0.172105	0.0422411	0.172105	0.876308	0.149686	1	1	1	24	13.5	NA	0.0740376	1	24	0	0	0	0	0	0	0	0	0	0	0.0833333	0	0	0	0.05	0.0833333
Rab26	3L	21327037	0.692491	0.0427712	0.61854	0.966109	0.150946	1	1	1	24	7.5	0.0246453	0.186553	1	24	0.671429	0.714286	0.582734	0.644578	0.746479	0.829545	0.780749	0.692308	0.588933	0.62963	0.583333	0.661538	0.61236	0.638554	0.676923	0.630952
CG33472	2R	7335128	0.0533224	0.0452052	0.177173	0.68701	0.156784	1	0.715476	1	24	18	0	0.0328043	1	24	0.772889	0.560669	0.753172	0.644796	0.751285	0.630511	0.801994	0.771487	0.811756	0.716814	0.802699	0.745518	0.796312	0.778307	0.708767	0.795508
Vap-33-1	X	3847297	0.909765	0.0493635	0.389195	0.973992	0.166304	1	0.244048	1	24	12	0.0300118	0.649433	1	48	0.125	0.304348	0.175	0.261905	0.2	0.310345	0.394737	0.170732	0.290323	0.313725	0.288136	0.275	0.5	0.333333	0.372093	0.409091
DopEcR	3L	4369459	0.0638203	0.0522424	0.287752	0.7243	0.172581	1	0.434722	1	24	0	0.0126771	1	1	48	0.0972727	0.0767196	0.055332	0.0732601	0.07743	0.0806258	0.0746141	0.115741	0.088423	0.033195	0.0664928	0.0685328	0.0776119	0.0482063	0.0617871	0.0802048
CG15628	2L	4822418	0.884191	0.0543295	0.311555	0.97326	0.176982	1	0.434722	1	24	10.5	0.00926256	0.729691	1	12	0.127932	0.110169	0.114833	0.124352	0.120482	0.0670391	0.107981	0.110714	0.0659722	0.121951	0.0487013	0.0721311	0.102894	0.0837696	0.0983607	0.0909091
CG32627	X	13607573	0.206653	0.0548488	0.393107	0.894812	0.178058	1	1	1	24	10.5	0.0180255	0.190529	1	16	0.127907	0.101695	0.0769231	0.17	0.1375	0.105263	0.125	0.0679612	0.0454545	0.0344828	0.0588235	0.151515	0.0851064	0.0841121	0.0253165	0.115385
CG32245	3L	4590709	0.144707	0.0580158	0.371608	0.856256	0.184463	1	1	1	24	7.5	0.00872404	0.474414	1	24	0.795	0.818182	0.765799	0.842857	0.833333	0.822695	0.763393	0.809524	0.743719	0.693431	0.725926	0.719424	0.933333	0.705882	0.641892	0.789474
Trf2	X	8318774	0.572249	0.0601099	0.218258	0.959277	0.188556	1	0.0220238	1	24	6	0.0170161	0.457741	1	12	0.0582524	0.0828025	0.039604	0.034188	0.046875	0.0533333	0.0365854	0.0316456	0.0538922	0.0879121	0.0714286	0.121387	0.0609756	0.048913	0.0491803	0.0641026
CG3711	X	818310	0.917485	0.0605371	0.827817	0.974205	0.189377	1	1	1	24	10.5	3.81639e-17	1	1	48	0.9	0.666667	0.8	0.5	0.2	0.636364	0.6	0.75	0.4	0.428571	0.363636	0.636364	0.384615	0.333333	0.333333	0.4
mbl	2R	13262374	0.140772	0.0612637	0.0291784	0.852829	0.190764	1	1	1	24	7.5	0.0827398	0.569841	1	12	0.415842	0.727273	0.181818	0.433333	0.344828	0.52	0.333333	0.363636	0.170732	0.272727	0.416667	0.269231	0.3	0.322581	0.387097	0.425926
boss	3R	21791353	0.437637	0.0624332	0.660401	0.94741	0.192969	1	0.715476	1	24	15	0.00113866	0.414144	1	12	0.27027	0.259259	0.26087	0.308943	0.212121	0.435484	0.395604	0.297297	0.160714	0.27907	0.180556	0.292683	0.178571	0.0967742	0.292683	0.277778
fal	3L	19287959	0.944898	0.0631566	0.972281	0.974935	0.194317	1	0.434722	1	24	21	0.0252538	0.00245362	1	12	0.0357143	0	0	0.0555556	0.0196078	0	0.0140845	0	0.108911	0.137255	0.111111	0.155172	0.0289855	0.0194175	0.0222222	0.0217391
tutl	2L	4320691	0.360412	0.0651061	0.516095	0.936853	0.197889	1	1	1	24	13.5	NA	0.19845	1	24	0	0	0	0	0	0	0	0.0588235	0.08	0	0.0588235	0	0.0444444	0	0.0384615	0.1
CG16974	2L	13188408	0.345091	0.0681845	0.90332	0.934234	0.203357	1	1	1	24	7.5	0.0883883	0.103015	1	24	0.25	1	0	0.461538	1	0.333333	0.4	0.727273	0.375	0.272727	0.153846	0.210526	0.217391	0.375	0	0.166667
CG34413	2R	20770274	0.235127	0.0702399	0.844239	0.906357	0.206895	1	1	1	24	13.5	0	0.497787	1	16	0.6	0	0.5	0.285714	0.222222	0.333333	0.411765	0.111111	0	0	0.25	0.227273	0.285714	0.1	0.222222	0
CG42492	X	5525068	0.361964	0.0722901	0.993153	0.937107	0.210338	1	1	1	24	13.5	0	0.425099	1	16	0.84058	0.875	0.790123	0.862857	0.629032	0.75	0.790698	0.801887	0.666667	0.771429	0.737374	0.700637	0.670077	0.708661	0.653465	0.816327
Rdl	3L	9148285	0.755968	0.0723543	0.651682	0.968866	0.210445	1	1	1	24	16.5	0.0166451	0.123063	1	16	0.243243	0.197183	0.254902	0.290323	0.263736	0.28125	0.256579	0.243902	0.230366	0.226519	0.193853	0.171171	0.267241	0.206009	0.216418	0.24581
CG13550	2R	19255108	0.50945	0.0753048	0.0207546	0.954486	0.215251	1	0.244048	1	24	18	0.0353553	0.430855	1	12	0.0588235	0	0.05	0.133333	0	0	0.0454545	0.05	0.142857	0.111111	0.0526316	0.0645161	0.111111	0.0833333	0.0357143	0
CG13096	2L	8509526	0.492745	0.0764166	0.213872	0.953015	0.217019	1	1	1	24	4.5	0	1	1	48	0	0.00917431	0	0.0110092	0.0137931	0.0121457	0.00291545	0.00671141	0.02267	0.00662252	0.0153374	0.0112994	0.0118343	0.00712589	0.0083682	0.0129032
pyd	3R	4663332	0.521903	0.0765424	0.477152	0.955524	0.217218	1	1	1	24	10.5	0.0589256	0.543987	1	16	0.684211	0.5	0.5	0.666667	0.714286	0.652174	0.756098	0.604651	0.564103	0.571429	0.434783	0.597403	0.597222	0.632653	0.5	0.5
na	X	14168301	0.954015	0.0814835	0.890292	0.975169	0.225655	1	1	1	24	13.5	0.0409896	0.463038	1	24	0.290323	0.307692	0.487179	0.388889	0.473684	0.454545	0.377358	0.421053	0.388889	0.37037	0.272727	0.345455	0.290323	0.272727	0.369565	0.227273
Adar	X	1675873	0.794041	0.0819412	0.479022	0.970314	0.226416	1	1	1	24	13.5	0.0294628	1	1	48	0.416667	0.5	0.538462	0.583333	0.333333	0.5	0.363636	0.470588	0.625	0.6	0.5625	0.4	0.6	0.4	0.833333	0.75
unc79	3R	15056818	0.39758	0.0836902	0.219925	0.942417	0.229292	1	0.715476	1	24	10.5	0.0325856	0.345715	1	12	0.105263	0.25	0.142857	0.0967742	0.05	0.1	0.24	0.0681818	0.0526316	0	0.0714286	0.121212	0.15625	0	0.142857	0
pst	3L	7352236	0.349477	0.0872475	0.349477	0.935006	0.234995	1	1	1	24	13.5	0	1	1	24	0	0.333333	0	0.176471	0	0	0	0.142857	0	0	0	0	0	0	0	0
cpx	3R	123239	0.512848	0.0879776	0.633242	0.954774	0.236142	1	1	1	24	13.5	0.0088323	0.606159	1	24	0.293031	0.18001	0.318012	0.280097	0.364074	0.335325	0.355331	0.36063	0.282739	0.194456	0.25344	0.294137	0.201082	0.282662	0.215733	0.313741
Tm1	3R	11122405	0.59218	0.0888899	0.0907168	0.960594	0.237564	1	0.244048	1	24	15	0.0196419	0.387545	1	12	0	0	0.0555556	0.0277778	0	0	0.04	0	0.0681818	0.0714286	0	0.0571429	0.1	0	0.0357143	0
CG11844	3R	20950991	0.339744	0.09479	0.56502	0.933268	0.247504	1	1	1	24	7.5	NA	0.406399	1	48	0	0	0	0	0	0.0153846	0	0	0	0	0.0263158	0	0.0151515	0.0444444	0.0232558	0
PhKgamma	X	11598212	0.879224	0.0976763	0.747725	0.973113	0.252202	1	1	1	24	10.5	0.00919879	0.968817	1	24	0.1	0.0769231	0.0666667	0.102941	0.152174	0.176471	0.142857	0.227273	0.105263	0.0454545	0.0606061	0.0694444	0.0526316	0.163636	0.0740741	0.05
syt	2L	2785621	0.156818	0.102473	0.507685	0.865867	0.259782	1	1	1	24	10.5	0.00451115	0.471704	1	48	0.458805	0.655882	0.471564	0.509657	0.494318	0.509174	0.506098	0.49767	0.453444	0.490674	0.467565	0.460284	0.464832	0.49514	0.494592	0.482313
unc79	3R	15056819	0.787468	0.104346	0.497044	0.970074	0.262669	1	1	1	24	13.5	0	0.582162	1	12	0.263158	0.25	0.148148	0.225806	0.105263	0.2	0.4	0.159091	0.216216	0.166667	0.05	0.0606061	0.205882	0.133333	0.171429	0.125
stj	2R	9697052	0.0104126	0.108068	0.166233	0.310052	0.268284	1	0.434722	1	24	16.5	0.0106837	0.0302889	1	12	0.774854	0.709302	0.789963	0.789357	0.765217	0.794595	0.815789	0.824027	0.807246	0.758242	0.776657	0.872549	0.827972	0.748148	0.792717	0.861751
vsg	3L	9707666	0.791299	0.110927	0.992066	0.970215	0.272494	1	1	1	24	4.5	0.0135824	0.670924	1	12	0.114754	0.131313	0.0752688	0.0928962	0.159574	0.205882	0.198473	0.15748	0.038835	0.111111	0.0707071	0.0347222	0.129032	0.118182	0.09375	0.146341
PhKgamma	X	11598221	0.262031	0.115613	0.778601	0.915156	0.279205	1	1	1	24	10.5	0.0299889	1	1	12	0.3125	0.09375	0.0967742	0.178571	0.169811	0.194444	0.1875	0.226667	0.262295	0.0961538	0.333333	0.268293	0.285714	0.242424	0.163636	0.375
cpx	3R	123226	0.26959	0.116296	0.271952	0.917339	0.280165	1	1	1	24	13.5	0.0108375	0.750011	1	12	0.411401	0.438923	0.442054	0.48747	0.591486	0.472744	0.549909	0.568387	0.475884	0.435939	0.384306	0.435294	0.581461	0.455627	0.286913	0.431896
NAT1	2R	8808751	0.303546	0.117452	0.27979	0.9259	0.281777	1	1	1	24	13.5	0.0188562	0.107549	1	12	0.659574	0.333333	0.5	0.386667	0.529412	0.377778	0.690909	0.641509	0.42029	0.388889	0.458333	0.458824	0.475	0.46988	0.348485	0.4375
MRP	2L	12724897	0.0298447	0.118797	0.321022	0.551276	0.283638	1	1	1	24	13.5	0.0105061	0.147314	1	24	0.418605	0.481481	0.388889	0.571429	0.444444	0.454545	0.6	0.6875	0.578947	0.410256	0.285714	0.555556	0.333333	0.3	0.25	0.666667
cpx	3R	123240	0.419961	0.123515	0.586432	0.945318	0.290023	1	1	1	24	13.5	0.00642977	0.675813	1	12	0.449405	0.255513	0.467591	0.406838	0.511859	0.475389	0.509875	0.5148	0.429251	0.293861	0.381525	0.432383	0.321778	0.41459	0.321549	0.462194
CG8368	3L	6600302	0.790389	0.124223	0.790389	0.970181	0.290963	1	1	1	24	13.5	NA	0.508084	1	48	0	0	0	0	0	0	0	0	0.0238095	0	0	0.0227273	0	0.030303	0	0
CG33472	2R	7335122	0.0137665	0.124349	0.00845988	0.362642	0.291131	1	0.715476	1	24	21	0.0226736	0.0868793	1	24	0.829426	0.698372	0.79736	0.781985	0.806238	0.734104	0.823513	0.808535	0.81282	0.796518	0.803298	0.812416	0.780947	0.806418	0.784922	0.800964
Rab35	X	20051543	0.347106	0.129304	0.734965	0.934591	0.297576	1	1	1	24	4.5	0	0.411333	1	16	0.04	0	0.0416667	0.0178571	0.0434783	0.0377358	0.0375	0.0338983	0.0238095	0	0	0	0.027027	0	0.0246914	0.0540541
CG7492	3L	7647772	0.96148	0.1307	0.492179	0.975357	0.299353	1	1	1	24	10.5	0.0207648	0.56738	1	16	0.211538	0.2	0.27027	0.137931	0.148936	0.289474	0.149254	0.297297	0.170213	0.136364	0.0588235	0.194444	0.25	0.0793651	0.2	0.117647
CG6860	2L	17371342	0.317109	0.131207	0.710267	0.928844	0.299994	1	1	1	24	16.5	0	0.661011	1	12	0.850877	0.643411	0.83908	0.734266	0.733766	0.770642	0.813472	0.735632	0.842932	0.809524	0.860294	0.88587	0.806897	0.767773	0.792857	0.752577
CG31149	3R	14796414	0.3247	0.135823	0.374341	0.930392	0.305729	1	1	1	24	16.5	9.81308e-18	0.847824	1	16	0.247873	0.125338	0.245487	0.194051	0.184965	0.193042	0.243972	0.232984	0.208627	0.121469	0.174707	0.161353	0.201908	0.214953	0.151413	0.195524
CG7263	2L	2153340	0.194772	0.136722	0.103409	0.889107	0.306826	1	1	1	24	10.5	0.0168359	0.422043	1	16	0	0.0833333	0.0588235	0.0357143	0	0	0	0	0.0714286	0	0	0.157895	0	0	0.0909091	0.125
CG42235	3R	21733870	0.231884	0.141757	0.662649	0.905172	0.312846	1	0.434722	1	24	19.5	0.0294628	0.919279	1	12	0.1	0	0	0.0833333	0	0	0.111111	0.142857	0	0	0	0.0666667	0	0	0.0666667	0
hth	3R	6410642	0.288845	0.142824	0.455899	0.922421	0.314097	1	1	1	24	7.5	0.022338	0.381133	1	16	0.483871	0.216667	0.42069	0.305221	0.485714	0.43956	0.436567	0.430556	0.491935	0.37963	0.403614	0.470899	0.503356	0.504673	0.421053	0.513274
14-3-3zeta	2R	5996305	0.0350445	0.144526	0.32633	0.590599	0.316073	1	0.124603	1	24	1.5	0.014987	0.487855	1	12	0.31876	0.332117	0.269979	0.289727	0.301558	0.290169	0.274882	0.295126	0.32273	0.311475	0.298587	0.303354	0.365079	0.289679	0.293142	0.296235
GXIVsPLA2	3L	15949184	0.55812	0.144843	0.059884	0.958289	0.316439	1	0.184325	1	24	19.5	0.0141421	0.756599	1	24	0	0.0175439	0.04	0.0808081	0.0508475	0	0.0740741	0.097561	0.0877193	0.0925926	0.0425532	0.0172414	0.0666667	0.0727273	0.0588235	0.0909091
Ca-beta	2L	11159893	0.250749	0.145541	0.920894	0.911676	0.317241	1	0.715476	1	24	21	0.0107701	0.286412	1	12	0.48503	0.527778	0.469799	0.604938	0.582418	0.43299	0.56701	0.51875	0.541833	0.426966	0.485106	0.507092	0.496154	0.459364	0.460317	0.492147
GluClalpha	3R	15579485	0.451451	0.147273	0.314252	0.948937	0.319217	1	1	1	24	10.5	0	0.777111	1	12	0.583333	0.75	0.607143	0.608696	0.666667	0.583333	0.633333	0.724138	0.76087	0.76	0.784314	0.517241	0.866667	0.775	0.583333	0.684211
CG14142	3L	11168895	0.889847	0.151928	0.640254	0.973426	0.325377	1	1	1	24	13.5	0.0128565	0.772469	1	12	0.764706	0.6	0.833333	0.636364	0.4	0.666667	0.52381	0.684211	0.375	0.5	0.2	0.5	0.75	0.583333	0.5	0.6
Shab	3L	2941425	0.143859	0.163575	0.799457	0.855531	0.340167	1	0.715476	1	24	0	0.0150763	0.0557399	1	16	0.461538	0.5	0.440217	0.572519	0.577586	0.505618	0.485437	0.566964	0.455598	0.447761	0.424658	0.491329	0.528409	0.5	0.487288	0.517241
Ac13E	X	15407485	0.727877	0.166901	0.922141	0.967703	0.344234	1	1	1	24	13.5	NA	0.621954	1	16	0	0	0	0	0	0	0.0555556	0	0	0.153846	0.166667	0.0666667	0.0434783	0	0	0
GstS1	2R	12984876	0.865374	0.169014	0.814551	0.972694	0.346783	1	1	1	24	16.5	2.45327e-18	0.785361	1	12	0	0.0769231	0.0588235	0.0263158	0	0	0	0.0434783	0.0714286	0	0	0.0384615	0.0666667	0.117647	0.0769231	0.125
shot	2R	9775061	0.324256	0.175291	0.69049	0.930303	0.354203	1	1	1	24	13.5	0.0346382	0.942502	1	48	0.639175	0.413793	0.535714	0.511765	0.552083	0.681319	0.586777	0.663265	0.637097	0.489796	0.635659	0.654762	0.777778	0.553398	0.637097	0.75
CG9413	X	14479667	0.630971	0.17655	0.92724	0.962927	0.355664	1	1	1	24	16.5	0.0178827	0.403598	1	12	0.143836	0.181208	0.224719	0.231788	0.0409836	0.0340314	0.0796703	0.0582192	0.0666667	0.0833333	0.0526316	0.125	0	0.0487805	0.0638298	0.111111
CG32377	3L	7659736	0.478922	0.183103	0.865448	0.951725	0.363128	1	0.575099	1	24	18	0	0.410225	1	24	0.222222	0.5	0.222222	0.75	0.2	0	0.409091	0.285714	0.625	0.571429	0.421053	0.857143	0.375	0.387097	0.3	0.384615
norpA	X	4251684	0.549027	0.186784	0.730901	0.957628	0.36722	1	1	1	24	13.5	0	0.766053	1	12	0	0.00283286	0	0.00278164	0.0035461	0.00168067	0.00622407	0.00226757	0.00638978	0.00238095	0.00381679	0.00973236	0	0.00239234	0.00645161	0.0045045
CG12237	X	19535625	0.93867	0.189842	0.28749	0.974773	0.370566	1	1	1	24	13.5	0.0386235	0.546407	1	16	0.176471	0.25	0.285714	0.4375	0.125	0.4	0.222222	0.166667	0.25	0.0769231	0.333333	0.103448	0.222222	0.16	0.103448	0.214286
Ndae1	2L	7228779	0.0467201	0.19482	0.11358	0.65791	0.375911	1	0.715476	1	24	0	0.0847981	0.767736	1	24	0.642857	0.454545	0.461538	0.574468	0.578947	0.473684	0.464286	0.37931	0.352941	0.136364	0.473684	0.517241	0.633333	0.25	0.4375	0.666667
Atpalpha	3R	16790050	0.957144	0.195604	0.910839	0.975248	0.376742	1	1	1	24	10.5	0	1	1	48	0.142857	0.142857	0.125	0.025641	0.15	0.111111	0.196721	0.269231	0.115385	0	0.0344828	0.0697674	0.0454545	0.170732	0.0769231	0.176471
CG11526	3L	3323676	0.591337	0.19748	0.591337	0.96054	0.378718	1	1	1	24	13.5	0	0.516257	1	12	0.2	0	0.25	0	0	0	0	0	0	0	0	0	0	0	0	0
CG11896	3R	12971944	0.582008	0.202934	0.582008	0.959933	0.384366	1	1	1	24	13.5	NA	0.632874	1	24	0	0	0	0	0	0	0	0	0.0555556	0	0	0.037037	0	0	0	0
CG3056	X	1267635	0.222363	0.204078	0.807059	0.901511	0.385533	1	0.244048	1	24	18	0.0158301	0.655699	1	48	0.162846	0.14489	0.167277	0.197578	0.204515	0.155616	0.189049	0.177363	0.15	0.137759	0.181379	0.162809	0.192854	0.158885	0.153921	0.156065
SK	X	5290552	0.979051	0.20515	0.693505	0.975788	0.386621	1	1	1	24	16.5	0.0190358	1	1	48	0.341837	0.377193	0.431034	0.420732	0.473214	0.460674	0.464	0.479452	0.432432	0.462069	0.464706	0.449367	0.559055	0.459459	0.445652	0.46988
phol	3L	9449220	0.573975	0.207872	0.573975	0.959395	0.38936	1	1	1	24	16.5	0.0130946	0.716485	1	24	0	0	0.037037	0.0625	0	0	0	0	0	0	0	0	0	0	0	0
Rdl	3L	9148318	0.595025	0.209454	0.813939	0.960775	0.390938	1	0.434722	1	24	18	0.00471405	1	1	48	0.9	0.852941	0.906667	0.88	0.896552	0.880597	0.901316	0.912281	0.931694	0.946524	0.924829	0.885321	0.928571	0.858447	0.88	0.939891
Acyp2	3R	11618571	0.567689	0.211903	0.567689	0.958964	0.393357	1	1	1	24	4.5	0.0160706	0.91225	1	12	0.0833333	0.0454545	0	0	0	0	0	0	0	0	0	0	0	0	0	0
CG7453	X	19074646	0.565167	0.213563	0.565167	0.958788	0.394982	1	1	1	24	13.5	NA	0.0190972	1	16	0	0	0	0	0	0	0	0	0	0	0	0.0188679	0.0357143	0	0	0
fs(1)K10	X	2136832	0.395716	0.213576	0.955176	0.942161	0.394994	1	1	1	24	7.5	0	0.904885	1	12	0.0789474	0.0731707	0.1	0.0967742	0.09375	0.157895	0.0571429	0.0294118	0.05	0.131579	0.0416667	0.0434783	0.102564	0.0227273	0.0588235	0
CG3680	3L	20804979	0.560731	0.216547	0.560731	0.958476	0.397873	1	1	1	24	13.5	NA	0.154292	1	24	0	0	0	0	0	0	0	0	0	0	0.0833333	0.166667	0	0	0	0
hth	3R	6410902	0.552383	0.217106	0.978587	0.957874	0.39841	1	0.715476	1	24	18	3.92523e-17	0.196615	1	24	0.515152	0.253968	0.4375	0.397163	0.394737	0.488372	0.561798	0.580882	0.514925	0.333333	0.564706	0.513661	0.583333	0.602273	0.505051	0.630435
unc79	3R	15056822	0.305037	0.218764	0.0378913	0.926236	0.399996	1	0.0565476	1	24	21	0.0707107	0.32969	1	24	0.105263	0	0	0.1	0.0555556	0	0	0.133333	0.0909091	0.181818	0.027027	0.0434783	0.0285714	0.0714286	0.09375	0.0666667
nAcRbeta-64B	3L	4429967	0.878898	0.220223	0.810829	0.973103	0.401382	1	1	1	24	7.5	0.0189043	0.0506011	1	12	0.362887	0.272727	0.309417	0.360294	0.361111	0.426136	0.358407	0.351536	0.330532	0.301115	0.345912	0.300885	0.348387	0.323009	0.32687	0.306452
Hsc70-3	X	11696800	0.184346	0.22578	0.0240104	0.883565	0.406582	1	0.244048	1	24	15	0.00969089	0.391857	1	16	0.012931	0.0243902	0.0380952	0.0288462	0	0.0083682	0.0163934	0.0134228	0.0684932	0	0.00763359	0.0430108	0.0645161	0.012	0.0231214	0
DIP1	X	21500535	0.304242	0.226044	0.358668	0.926057	0.406826	1	0.124603	1	24	12	0.0431973	0.0723101	1	12	0.0178571	0.190476	0.0789474	0.0606061	0.0408163	0.0540541	0.0727273	0.0224719	0.025	0.0322581	0.0232558	0.0701754	0.056338	0.0780142	0.00719424	0.0384615
Ih	2R	10185499	0.583114	0.226594	0.773839	0.960006	0.407413	1	1	1	24	16.5	0	1	1	48	0.283951	0.0425532	0.276316	0.168	0.0877193	0.196429	0.219858	0.252427	0.174497	0.0909091	0.175258	0.0896552	0.13198	0.159664	0.118421	0.189189
Ugt	3L	18868083	0.542337	0.229847	0.542337	0.957128	0.410858	1	1	1	24	7.5	0	1	1	48	0.25	0	0.1	0	0	0	0	0	0	0	0	0	0	0	0	0
Spn	3L	2524764	0.524345	0.24451	0.524345	0.955722	0.425905	1	1	1	24	13.5	NA	0.763007	1	12	0	0	0	0	0	0	0	0	0	0	0.142857	0.0454545	0	0	0	0
sgg	X	2554794	0.523009	0.245673	0.523009	0.955614	0.427066	1	1	1	24	13.5	NA	0.34882	1	12	0	0	0	0	0	0	0	0	0.0444444	0	0	0.0138889	0	0	0	0
CG9425	3L	14792353	0.407365	0.247891	0.53911	0.943722	0.429267	1	1	1	24	13.5	0	0.834035	1	16	0.126214	0.0434783	0.113043	0.106667	0.0747664	0.096	0.136752	0.0307692	0.152941	0.0740741	0.111111	0.0666667	0.146341	0.102941	0.0943396	0.173913
GluClalpha	3R	15591382	0.00783129	0.251814	0.0205366	0.299855	0.433118	1	0.715476	1	24	18	0.169091	0.851781	1	24	0.26087	0	0.5	0.304348	0.363636	0.0833333	0.333333	0.40625	0.327586	0.295918	0.234783	0.388235	0.326797	0.283333	0.338129	0.375887
Ggamma1	2R	4791179	0.194693	0.25889	0.154685	0.889067	0.439934	1	0.434722	1	24	3	0.0110671	0.365925	1	24	0.107563	0.0952381	0.0785071	0.0919118	0.0905797	0.1167	0.0716113	0.0885559	0.0869565	0.088843	0.0777439	0.0738178	0.116279	0.0661765	0.102349	0.0630137
Prosbeta5	2R	6707654	0.500996	0.260772	0.912392	0.953753	0.44172	1	1	1	24	13.5	0	0.410636	1	24	0	0.0625	0	0.16129	0	0	0	0	0.0384615	0.0833333	0.111111	0.285714	0.0434783	0	0.08	0
Shab	3L	2940825	0.305867	0.263567	0.836799	0.926421	0.44435	1	1	1	24	7.5	0.00386397	0.95699	1	16	0.0364583	0	0.0145349	0.010929	0.0482759	0.0462963	0.0316623	0.0204082	0.0409556	0.0132159	0.0494792	0.0235294	0.0447761	0.045283	0.0369128	0.0295359
CG6206	2L	10458754	0.902105	0.267972	0.17696	0.973777	0.448447	1	0.244048	1	24	3	0.0121915	0.459963	1	12	0.0185185	0.0172414	0	0	0.0181818	0	0	0	0	0.0361446	0.0204082	0.0294118	0	0	0.0277778	0
CG31140	3R	19808079	0.286699	0.283328	0.752912	0.921886	0.462265	1	1	1	24	10.5	0.00106456	0.211837	1	24	0.22611	0.304813	0.231618	0.301802	0.237179	0.243902	0.242875	0.235632	0.235145	0.247368	0.215953	0.284404	0.22409	0.218837	0.235935	0.236264
tou	2R	7468541	0.7843	0.28927	0.70822	0.969957	0.467429	1	1	1	24	7.5	0	0.795505	1	24	0.181818	0	0.125	0	0	0.142857	0.0909091	0.111111	0.428571	0.75	0.125	0.318182	0	0.0666667	0	0
Gbeta5	X	8046019	0.129504	0.292023	0.347648	0.842046	0.469787	1	0.575099	1	24	6	0.471405	0.474845	1	16	0	0.333333	0	0	0	0.0555556	0	0	0	0	0	0	0	0.0666667	0	0
CG7115	2L	7821975	0.868916	0.292806	0.999265	0.972803	0.470454	1	1	1	24	13.5	0.0114565	0.838708	1	16	0.0597015	0.125	0.0921053	0.283465	0.0285714	0	0.0246914	0.0123457	0.257426	0.322034	0.34	0.454545	0.0172414	0.0121212	0.0222222	0.0238095
CG12858	2R	10629097	0.54317	0.304672	0.867968	0.957191	0.480361	1	1	1	24	13.5	0.00654729	0.263594	1	16	0.5	0.421053	0.518519	0.522727	0.491525	0.555556	0.527559	0.487805	0.460317	0.305556	0.436364	0.494845	0.454545	0.494845	0.607595	0.447368
CG18437	3R	23498894	0.235761	0.305658	0.379282	0.906585	0.481168	1	0.244048	1	24	18	0.0638988	0.205583	1	48	0.431373	0.238095	0.484848	0.521739	0.347826	0.357143	0.464	0.35119	0.372414	0.361702	0.37594	0.44186	0.451613	0.264	0.266667	0.333333
CG7971	3L	1656150	0.0293145	0.306361	0.164066	0.546838	0.481741	1	0.124603	1	24	15	0.031427	0.189139	1	24	0	0	0.0444444	0.0444444	0	0.0181818	0.034965	0.04	0.0352941	0.0204082	0.0125	0.0326087	0.0140351	0.0310078	0.0186916	0.0816327
Syx1A	3R	19929436	0.0626339	0.308363	0.269288	0.720537	0.483368	1	1	1	24	13.5	0.00111461	0.13177	1	12	0.298157	0.250243	0.30131	0.229284	0.274068	0.268846	0.294341	0.273618	0.312069	0.280195	0.295361	0.271466	0.303722	0.279416	0.254587	0.267537
CG14142	3L	11168868	0.4108	0.314675	0.959484	0.944166	0.48843	1	0.715476	1	24	9	0.340926	0.569814	1	24	0.2	1	0.625	0.142857	0.4	0	0.388889	0.0625	0.375	0.2	0.2	0.111111	0	0.333333	0.375	0
larp	3R	24147538	0.543486	0.318674	0.507576	0.957214	0.491585	1	0.715476	1	24	12	0.151523	0.599743	1	48	0	0.333333	0.214286	0.1	0	0	0.0634921	0	0	0	0	0.0666667	0	0.0425532	0.0612245	0.125
slo	3R	20532273	0.958398	0.32254	0.99709	0.975279	0.494599	1	1	1	24	10.5	0	0.223658	1	16	0.769231	1	0.823529	0.769231	1	0.714286	0.971429	1	0.944444	0.888889	0.894737	0.9375	0.947368	0.9375	1	1
PTP-ER	2R	17508354	0.43544	0.328128	0.805479	0.947159	0.498893	1	0.715476	1	24	21	0.253746	0.238916	1	48	0.4	0	0.272727	0.631579	0.625	0.375	0.391304	0.333333	0.428571	0.333333	0.3	0.647059	0.580645	0.428571	0.8	0.357143
CG7628	3L	11126644	0.333734	0.334483	0.623137	0.932148	0.503689	1	0.339385	1	24	15	0.0307103	0.00870294	1	24	0.0113636	0.0294118	0.0816327	0.0547945	0	0	0.0196078	0.03125	0.0357143	0	0.0117647	0.06	0	0	0.0163934	0
CG5385	2L	10311991	0.883173	0.336717	0.96657	0.97323	0.505353	1	1	1	24	16.5	0.0243024	0.711352	1	24	0.0844156	0.108333	0.153153	0.255319	0	0.0246914	0.0104712	0.018018	0.282759	0.18	0.272	0.291304	0.0384615	0.026087	0.0439024	0.060241
Fur2	X	16271869	0.350096	0.341793	0.864412	0.935113	0.509092	1	0.124603	1	24	15	0.0533665	0.71805	1	24	0	0	0.0833333	0.0754717	0	0	0.0731707	0.0434783	0.166667	0	0.291667	0.148148	0	0	0.0232558	0
GluClalpha	3R	15589356	0.225561	0.343072	0.465153	0.902772	0.510026	1	1	1	24	13.5	0.023278	0.320751	1	12	0.716418	0.576923	0.782258	0.705882	0.735849	0.566667	0.732558	0.7625	0.728155	0.568627	0.730435	0.622642	0.482759	0.709677	0.666667	0.74359
l(1)G0196	X	21904571	0.477952	0.344363	0.345561	0.951632	0.510964	1	1	1	24	10.5	0.0942809	0.708076	1	16	0.384615	0	0.0909091	0.266667	0.166667	0.444444	0.190476	0.3	0.0344828	0	0.227273	0.133333	0.108108	0	0.3125	0.428571
det	3R	15411977	0.549191	0.345723	0.842825	0.95764	0.511949	1	1	1	24	13.5	0	0.0188303	1	24	0.0714286	0.2	0.222222	0	0	0	0	0.08	0.0666667	0	0.0909091	0	0	0	0.0909091	0
alpha-Spec	3L	1782670	0.369968	0.345897	0.0221886	0.938384	0.512075	1	0.0565476	1	24	18	0.12053	0.0239299	1	48	0.375	0	0.545455	0.45	0.315789	0.235294	0.5	0.708333	0.5	0.428571	0.310345	0.48	0.590909	0.625	0.44	0.25
CG17735	3R	617163	0.441099	0.346594	0.441099	0.947801	0.512578	1	1	1	24	13.5	NA	1	1	48	0	0	0	0	0	0	0	0	0.111111	0	0	0	0	0	0	0
CG32485	3L	3051459	0.441099	0.346594	0.441099	0.947801	0.512578	1	1	1	24	7.5	0.202031	1	1	48	0	0.142857	0	0	0	0	0	0	0	0	0	0	0	0	0	0
BtbVII	3L	3150523	0.441099	0.346594	0.441099	0.947801	0.512578	1	1	1	24	13.5	0.353553	1	1	48	0	0	0.25	0	0	0	0	0	0	0	0	0	0	0	0	0
CG11166	2R	3287203	0.441099	0.346594	0.441099	0.947801	0.512578	1	1	1	24	13.5	NA	1	1	12	0	0	0	0	0	0	0	0.1	0	0	0	0	0	0	0	0
Mmp2	2R	5501053	0.441099	0.346594	0.441099	0.947801	0.512578	1	1	1	24	13.5	NA	1	1	12	0	0	0	0	0	0	0	0	0	0	0	0	0	0	0.0625	0
CG42236	2R	6321780	0.441099	0.346594	0.441099	0.947801	0.512578	1	1	1	24	13.5	NA	1	1	48	0	0	0	0	0	0	0	0.0116279	0	0	0	0	0	0	0	0
CG4502	2L	7196346	0.441099	0.346594	0.441099	0.947801	0.512578	1	1	1	24	13.5	NA	1	1	48	0	0	0	0	0	0	0	0	0	0	0	0.2	0	0	0	0
Jupiter	3R	7418289	0.441099	0.346594	0.441099	0.947801	0.512578	1	1	1	24	13.5	NA	1	1	48	0	0	0	0	0	0	0	0	0	0	0	0.025641	0	0	0	0
CG5973	2L	7444800	0.441099	0.346594	0.441099	0.947801	0.512578	1	1	1	24	13.5	0.128565	0.754818	1	24	0	0	0.0909091	0	0	0	0	0	0	0	0	0	0	0	0	0
pps	3R	8244658	0.441099	0.346594	0.441099	0.947801	0.512578	1	1	1	24	13.5	NA	1	1	48	0	0	0	0	0	0	0	0	0.0384615	0	0	0	0	0	0	0
Sin3A	2R	8469060	0.441099	0.346594	0.441099	0.947801	0.512578	1	1	1	24	13.5	NA	1	1	48	0	0	0	0	0	0	0	0	0	0	0	0	0.0526316	0	0	0
Ciao1	2R	10741883	0.441099	0.346594	0.441099	0.947801	0.512578	1	1	1	24	13.5	NA	1	1	24	1	1	1	1	1	1	1	1	1	1	0.909091	1	1	1	1	1
CG6327	3L	11031140	0.441099	0.346594	0.441099	0.947801	0.512578	1	1	1	24	13.5	NA	1	1	48	0	0	0	0	0	0	0.0322581	0	0	0	0	0	0	0	0	0
Zasp	2R	11662558	0.441099	0.346594	0.441099	0.947801	0.512578	1	1	1	24	13.5	NA	1	1	48	0	0	0	0	0	0	0	0	0	0	0	0.166667	0	0	0	0
p24-1	X	11746322	0.441099	0.346594	0.441099	0.947801	0.512578	1	1	1	24	13.5	NA	1	1	24	0	0	0	0	0	0	0	0	0	0	0	0.0357143	0	0	0	0
CG7183	3R	14044652	0.441099	0.346594	0.441099	0.947801	0.512578	1	1	1	24	13.5	NA	1	1	48	0	0	0	0	0	0	0	0.0909091	0	0	0	0	0	0	0	0
BG642378	3L	19122313	0.441099	0.346594	0.441099	0.947801	0.512578	1	1	1	24	13.5	NA	1	1	48	0	0	0	0	0	0	0	0	0	0	0	0	0.0526316	0	0	0
l(1)G0156	X	19415759	0.441099	0.346594	0.441099	0.947801	0.512578	1	1	1	24	13.5	NA	1	1	48	0	0	0	0	0	0	0	0	0	0	0	0.125	0	0	0	0
swm	2L	19496003	0.441099	0.346594	0.441099	0.947801	0.512578	1	1	1	24	13.5	NA	1	1	48	0	0	0	0	0	0	0	0.0666667	0	0	0	0	0	0	0	0
CG42235	3R	21737191	0.441099	0.346594	0.441099	0.947801	0.512578	1	1	1	24	13.5	NA	1	1	48	0	0	0	0	0	0	0	0	0	0	0	0	0	0	0	0.111111
CG42492	X	5525081	0.668867	0.356261	0.511588	0.964954	0.519448	1	1	1	24	16.5	0	1	1	48	0.84507	0.6875	0.723404	0.758621	0.607143	0.689189	0.745455	0.67382	0.622517	0.659091	0.666667	0.695876	0.634199	0.711111	0.638095	0.82
cora	2R	15127430	0.808699	0.359722	0.634466	0.970837	0.521861	1	1	1	24	13.5	NA	1	1	12	0	0	0	0	0	0.1	0.0869565	0.0434783	0.0416667	0	0.0416667	0	0	0	0	0
CG30118	2R	14325767	0.567492	0.365553	0.73053	0.95895	0.525872	1	1	1	24	16.5	0.0294628	0.254639	1	12	0	0	0.0833333	0.125	0.0454545	0	0	0	0	0	0	0	0	0	0.0833333	0
Sap47	3R	11785130	0.840526	0.365802	0.997695	0.97191	0.526041	1	1	1	24	16.5	0.000143232	0.612448	1	48	0.0334851	0.0347722	0.0338902	0.0431776	0.0137607	0.0155869	0.0223245	0.0209012	0.0425422	0.0460514	0.0539032	0.0521401	0.0149457	0.0228035	0.0190255	0.0300355
Eip71CD	3L	15506114	0.683233	0.367502	0.801476	0.965665	0.527198	1	1	1	24	10.5	0.00660847	0.128374	1	48	0	0	0	0.00934579	0.0136986	0	0	0	0.015873	0	0.025	0.0196078	0	0	0	0
Shab	3L	2941131	0.706583	0.368609	0.21466	0.966762	0.527947	1	1	1	24	7.5	0.0334847	0.0661457	1	12	0.742857	0.5	0.648148	0.706897	0.756757	0.73913	0.704545	0.645669	0.580247	0.655172	0.553571	0.703704	0.653333	0.752381	0.607843	0.661972
Atpalpha	3R	16790761	0.764872	0.380268	0.919693	0.969217	0.5357	1	1	1	24	13.5	0.00461629	0.0275252	1	12	0.140496	0.177419	0.159236	0.190476	0.214876	0.221519	0.195767	0.215859	0.0676692	0.0793651	0.0344828	0.0990991	0.121622	0.211382	0.264463	0.307692
Rme-8	2R	5057083	0.768383	0.385847	0.420888	0.969353	0.539321	1	1	1	24	13.5	NA	0.731034	1	12	0	0	0	0	0	0	0.0625	0	0	0	0	0.111111	0	0.1	0	0
l(1)G0196	X	21904549	0.313879	0.385881	0.144882	0.928164	0.539343	1	1	1	24	4.5	0.083189	0.250642	1	16	0.8	1	0.416667	0.764706	0.6	1	0.777778	0.909091	0.615385	0.714286	0.85	0.695652	0.763158	0.619048	0.666667	0.857143
cno	3R	1001017	0.725957	0.390497	0.980338	0.96762	0.542296	1	1	1	24	13.5	0	0.702314	1	12	0.297297	0.267606	0.294118	0.212903	0.103226	0.1875	0.216129	0.230769	0.26045	0.358382	0.363636	0.242812	0.188976	0.223214	0.209003	0.246964
CG3065	2R	19858464	0.884363	0.392783	0.389028	0.973265	0.543744	1	1	1	24	10.5	0.0568211	0.721708	1	24	0.125	0.5	0.285714	0.25	0	0.166667	0	0	0.111111	0	0	0.235294	0.166667	0.0625	0.2	0
eag	X	14890707	0.939047	0.395915	0.978999	0.974783	0.545714	1	1	1	24	4.5	0	0.64185	1	48	0.615385	0.5	0.714286	0.545455	0.913043	1	0.714286	0.8	0.75	0.833333	0.888889	0.777778	0.857143	0.75	0.785714	0.75
Ugt36Bc	2L	16800107	0.309367	0.396698	0.853087	0.927193	0.546204	1	1	1	24	16.5	0	0.842321	1	48	0	0.047619	0	0.0666667	0.025	0	0.0731707	0.0441176	0.02	0.0363636	0.0381679	0.020979	0	0.06	0.11215	0.1
Ca-alpha1D	2L	16174138	0.240921	0.400397	0.117791	0.908403	0.548503	1	0.907937	1	24	9	0.141421	0.868659	1	48	0.9	1	1	1	1	1	1	0.833333	1	0.875	1	0.875	1	0.75	1	1
TfIIA-L	3R	23081899	0.836863	0.405604	0.404878	0.97179	0.551701	1	1	1	24	4.5	0	0.862522	1	12	0.0185874	0.0140845	0.0242215	0.0056338	0.0133779	0.00359712	0.0131579	0.00600601	0.0187793	0.0245399	0.0253165	0.0253165	0.0042735	0.00666667	0.00735294	0.0166667
CG32666	X	11447348	0.295188	0.411648	0.400846	0.923962	0.555357	1	1	1	24	16.5	0	0.198278	1	48	0.00344828	0.0199115	0.00370714	0.0159411	0.00464037	0.00638104	0.00734214	0.00745898	0.00995475	0.0118624	0.0182482	0.0141228	0.00327154	0.00673401	0.0107604	0.0112994
Nckx30C	2L	9717707	0.673136	0.420349	0.78975	0.965168	0.560515	1	1	1	24	13.5	0	0.703744	1	24	0.588235	0.4	0.214286	0.3125	0.166667	0.25	0.333333	0.285714	0.3125	0.1875	0.272727	0.263158	0.350877	0.181818	0.333333	0.25
bt	4	787890	0.946472	0.423663	0.265427	0.974976	0.562449	1	0.907937	1	24	15	0.117851	0.935601	1	24	0	0	0.166667	0.166667	0	0.05	0	0.047619	0	0	0	0	0.153846	0.0526316	0	0
Msp-300	2L	5185155	0.261599	0.423773	0.698329	0.915028	0.562513	1	0.434722	1	24	19.5	0.0144463	0.747075	1	24	0.43135	0.200489	0.39049	0.352868	0.284615	0.332653	0.405694	0.466752	0.386139	0.304465	0.425873	0.373504	0.467601	0.386252	0.305184	0.467153
Tm1	3R	11122417	0.347942	0.426119	0.459698	0.934738	0.563871	1	1	1	24	10.5	0	0.121224	1	12	0	0	0.027027	0	0.0294118	0	0	0.0444444	0.030303	0	0.02	0	0.0714286	0.0222222	0	0.0263158
tutl	2L	4314575	0.891352	0.426428	0.346724	0.973469	0.564049	1	1	1	24	13.5	5.41676e-05	1	1	48	0.934426	0.932203	0.934579	0.938462	0.97561	0.967742	0.985714	0.8625	0.882353	0.931818	0.794118	0.941176	0.968944	0.925	0.947368	0.966667
Acyp2	3R	11618565	0.339912	0.426619	0.577216	0.933299	0.56416	1	1	1	24	13.5	0.0589256	0.368328	1	16	0	0	0	0.0416667	0	0	0	0	0	0	0	0.272727	0	0	0	0
CG3056	X	1267622	0.0738839	0.426872	0.847517	0.75256	0.564305	1	0.244048	1	24	18	0.00742969	0.809701	1	12	0.291667	0.265306	0.275813	0.326633	0.250633	0.209068	0.330871	0.288786	0.286067	0.238434	0.345149	0.313539	0.326389	0.264117	0.279612	0.292453
NaCP60E	2R	20798584	0.699748	0.427185	0.488854	0.966448	0.564485	1	1	1	24	7.5	0	0.854786	1	16	0.384615	0.5	0.296296	0.529412	0.875	0.571429	0.617647	0.26087	0.421053	0.3	0.414634	0.666667	0.508197	0.388889	0.285714	0.461538
CG3164	2L	129166	0.506089	0.428055	0.66362	0.954198	0.564985	1	0.715476	1	24	13.5	0.000597497	0.916783	1	12	0	0.00353357	0.0041841	0.00314465	0.00211864	0.00274725	0.00323102	0.00972763	0	0.00233645	0	0.00454545	0.0131579	0.00972763	0.00206612	0.0122699
tutl	2L	4314586	0.72616	0.431605	0.74571	0.967629	0.567014	1	1	1	24	10.5	3.81639e-17	0.143814	1	16	0.65625	0.612903	0.782609	0.742857	0.795455	0.805556	0.782051	0.705882	0.647887	0.68	0.641026	0.675676	0.858974	0.729167	0.762712	0.59375
CG31729	2L	13299974	0.948017	0.431794	0.665509	0.975015	0.567122	1	1	1	24	10.5	0.157135	0.262853	1	12	0	0	0	0.222222	0.5	0.5	0.214286	0.2	0	0	0.2	0.166667	0	0.333333	0.25	0
CG14669	3R	1281800	0.449894	0.433316	0.438105	0.94877	0.567985	1	0.907937	1	24	3	0.0274422	1	1	24	0.631579	0.666667	0.590909	0.375	0.769231	0.666667	0.625	0.75	0.888889	1	0.8	1	0.875	0.4	0	1
endoA	3R	14735875	0.21689	0.441896	0.911325	0.899277	0.57279	1	0.339385	1	24	0	0.063421	0.660741	1	16	0.808102	0.605911	0.718412	0.757812	0.853791	0.784017	0.784017	0.794311	0.697802	0.635135	0.713178	0.71875	0.826087	0.729529	0.736402	0.825397
DopEcR	3L	4369422	0.210343	0.445318	0.870188	0.896466	0.574676	1	1	1	24	10.5	0.010019	0.679643	1	12	0.32788	0.248932	0.27627	0.27727	0.290086	0.312629	0.304636	0.335215	0.34278	0.286624	0.308013	0.316282	0.327293	0.288596	0.262737	0.328895
pyd	3R	4662651	0.587947	0.452578	0.677551	0.960321	0.578624	1	0.244048	1	24	9	0.101015	0.455464	1	48	0	0.166667	0.142857	0	0.333333	0.666667	0.333333	0	0	0.166667	0.125	0.571429	0.333333	0.555556	0.545455	0.142857
CG11796	3L	20432811	0.587287	0.452861	0.901525	0.960279	0.578777	1	1	1	24	13.5	0.000705346	0.324651	1	12	0.00483092	0	0.00682594	0.00353357	0	0	0	0	0	0	0.00970874	0.00680272	0.015873	0	0	0
pyd	3R	4662637	0.421092	0.453921	0.646138	0.945457	0.579347	1	0.434722	1	24	18	0.0924678	0.535445	1	12	0.769231	0.642857	0.9	0.84	0.75	0.6875	0.772727	0.666667	0.7	0.666667	0.647059	0.675676	0.738095	0.75	0.821429	0.782609
Rala	X	3604186	0.630159	0.457096	0.653628	0.962881	0.581044	1	1	1	24	7.5	0.235702	0.680652	1	24	0.166667	0	0	0	0	0	0	0	0.1	0	0.142857	0.142857	0	0	0	0
CG3056	X	1267379	0.834484	0.462118	0.68408	0.971712	0.583702	1	1	1	24	13.5	0.0574327	0.0175137	1	24	0.159091	0.181818	0.382353	0.344262	0.263158	0.173913	0.156627	0.1875	0.228571	0.22449	0.195652	0.134328	0.2	0.186047	0.232558	0.208333
sw	X	20106609	0.661434	0.472614	0.973526	0.964574	0.589149	1	0.575099	1	24	12	0.0259966	0.0398846	1	12	0	0.125	0.117647	0.0882353	0.0344828	0.111111	0	0.0769231	0.171875	0.285714	0.119048	0.285714	0	0.0322581	0	0
CG32245	3L	4586714	0.519288	0.480074	0.997892	0.95531	0.592934	1	0.715476	1	24	18	0.020027	0.634334	1	48	0.148148	0	0.115942	0.176471	0.0454545	0.173913	0.131868	0.1375	0.166667	0.0645161	0.146667	0.231707	0.0961538	0.151515	0.147727	0.117647
Caps	4	1268833	0.184121	0.487995	0.592424	0.88344	0.596878	1	0.715476	1	24	19.5	0.0459425	0.570372	1	24	0.169231	0.107143	0.175	0.258621	0.25	0.257143	0.238095	0.305556	0.261364	0.243902	0.206186	0.309524	0.216981	0.266667	0.153846	0.253968
CG32627	X	13607593	0.161235	0.488748	0.745026	0.869061	0.597249	1	0.575099	1	24	13.5	0.0110485	0.836445	1	16	0	0	0.0416667	0.03125	0.0131579	0.0204082	0.0147059	0.01	0.0229885	0	0.028169	0.0123457	0.0208333	0.0105263	0.0338983	0.04
CG33205	3L	9826401	0.468879	0.492284	0.872571	0.950742	0.598982	1	1	1	24	10.5	NA	0.353964	1	12	0	0	0	0	0.142857	0.25	0.5	0	0.0909091	0	0.111111	0.0625	0	0.0769231	0.125	0
Ca-alpha1T	X	6001653	0.714269	0.494694	0.463216	0.967108	0.600154	1	0.244048	1	24	1.5	0.063836	0.130774	1	24	0.555556	0.666667	0.375	0.411765	0.545455	0.529412	0.5	0.538462	0.387097	0.333333	0.625	0.458333	0.441026	0.478261	0.1875	0.777778
unc-13	4	899596	0.749865	0.497439	0.23101	0.96862	0.601481	1	1	1	24	13.5	0.00483622	0.31733	1	16	0.203163	0.200409	0.189484	0.25576	0.227273	0.210106	0.211279	0.206136	0.194419	0.303089	0.247005	0.221386	0.214379	0.215054	0.222556	0.172142
bt	4	787813	0.678286	0.50583	0.379263	0.965423	0.605484	1	0.907937	1	24	3	0.0543928	0.9472	1	48	0	0.0384615	0	0	0.125	0	0	0	0	0	0	0.0625	0	0	0	0
Treh	2R	16964430	0.121207	0.513605	0.909018	0.833038	0.609122	1	0.715476	1	24	12	0.00604365	0.0687575	1	16	0	0.00854701	0.016129	0	0	0	0.00609756	0.00826446	0	0.008	0.00543478	0.00469484	0	0	0.0083682	0
Shab	3L	2941132	0.133152	0.51593	0.056155	0.845706	0.610197	1	1	1	24	13.5	0.0279519	0.21794	1	12	0.884615	0.833333	0.861111	0.929825	0.894737	0.869565	0.91791	0.857143	0.810127	0.87931	0.798246	0.924528	0.853333	0.925926	0.841584	0.929577
CycG	3R	27427440	0.275012	0.518516	0.0341995	0.918836	0.611386	1	1	1	24	7.5	0.00541153	0.894604	1	48	0.285714	0.306122	0.1875	0.321429	0.357143	0.36	0.272727	0.484848	0.369565	0.272727	0.428571	0.287879	0.515152	0.204082	0.377049	0.3
Shab	3L	2941364	0.497385	0.527703	0.570462	0.953433	0.61555	1	1	1	24	7.5	0.00543928	0.511007	1	24	0.888112	0.929825	0.872727	0.911111	0.918367	0.858824	0.9125	0.916335	0.920213	0.851064	0.862434	0.878049	0.927184	0.945	0.860169	0.879032
CG7220	2R	6619239	0.325321	0.535001	0.333389	0.930515	0.618795	1	1	1	24	13.5	0	0.0409423	1	16	0	0.030303	0	0.0168067	0	0	0.0151515	0.0571429	0.030303	0	0	0.00934579	0.04	0.0196078	0.0204082	0.0454545
DopEcR	3L	4369162	0.267581	0.538015	0.870715	0.91677	0.62012	1	0.715476	1	24	21	7.85046e-17	0.776207	1	16	0.818671	0.660671	0.740564	0.619638	0.770286	0.735043	0.758471	0.799692	0.753452	0.667453	0.781818	0.698376	0.776256	0.65127	0.632653	0.772586
Ca-alpha1D	2L	16179463	0.862803	0.539441	0.254154	0.972615	0.620743	1	0.907937	1	24	18	0.0441942	0.470359	1	12	0.9375	0.666667	1	1	0.857143	1	0.916667	0.952381	1	1	0.931034	0.916667	1	1	0.777778	0.954545
pyd	3R	4662648	0.615197	0.564996	0.922463	0.962012	0.631577	1	1	1	24	13.5	0.073657	0.869613	1	24	0.4	0.166667	0.857143	0.375	0.4	0.666667	0.444444	1	0.222222	0.285714	0.272727	0.555556	0.642857	0.5	0.615385	0.571429
CG33205	3L	9826559	0.559133	0.565597	0.775561	0.958362	0.631824	1	0.907937	1	24	15	0	0.542252	1	16	0	0.363636	0.0833333	0.0666667	0	0	0.214286	0.111111	0.117647	0.0434783	0.0769231	0	0	0.142857	0.0714286	0.125
CG31716	2L	10401559	0.80269	0.566829	0.912006	0.970625	0.63233	1	1	1	24	4.5	0.0707107	0.104922	1	12	0.1	0	0	0	0.1	0.1	0.117647	0.0769231	0.05	0.0952381	0	0.0555556	0.0434783	0	0.111111	0
CG30492	2R	3537001	0.564944	0.566849	0.65358	0.958772	0.632338	1	1	1	24	10.5	NA	0.73425	1	24	0	0	0	0	0	0.0769231	0.0208333	0	0.016129	0.015625	0.1	0.0243902	0	0.02	0	0
CG16974	2L	13188337	0.468662	0.571117	0.236025	0.95072	0.63408	1	0.339385	1	24	21	0.117851	0.124001	1	16	0.833333	0	0.666667	0.454545	0.6	0.4	0.428571	0.833333	0.6	0.4	0.714286	0.222222	0.45	0.666667	0.25	0.4
CG32627	X	13608022	0.501318	0.572281	0.217641	0.953782	0.634553	1	1	1	24	4.5	0.0673435	0.21327	1	16	0.25	0.333333	0	0.142857	0	0.5	0	0.2	0.5	0	0	0	0	0.111111	0.222222	0.2
nAcRbeta-64B	3L	4433320	0.466857	0.575987	0.178395	0.950539	0.636048	1	1	1	24	13.5	0.0154901	0.372049	1	16	0.842105	0.5	0.878788	0.882353	1	0.818182	0.931034	0.758621	0.833333	1	0.944444	0.826087	0.785714	0.826087	0.857143	0.789474
CG8885	2L	4968572	0.803664	0.580436	0.983629	0.970659	0.637828	1	1	1	24	13.5	0.0233267	0.972768	1	12	0.0810811	0.16129	0.147059	0.3125	0.0172414	0.0243902	0.0357143	0.0131579	0.238095	0.179487	0.285714	0.314286	0	0.0103093	0.031746	0.0666667
Caki	3R	17615210	0.305094	0.584151	0.0721246	0.926248	0.6393	1	1	1	24	13.5	0	0.972232	1	16	0.05	0	0	0	0	0	0.0833333	0	0	0.0555556	0	0	0.0277778	0.117647	0	0
CG5805	3R	20611260	0.543278	0.588652	0.616584	0.957199	0.641068	1	1	1	24	7.5	NA	0.754399	1	12	0	0	0	0	0	0.166667	0	0.0363636	0.0350877	0	0.103448	0	0	0.09375	0.0344828	0.0588235
hkl	2L	19045825	0.90928	0.589504	0.725337	0.973979	0.641401	1	1	1	24	16.5	0.0160706	0.0238667	1	16	0.0384615	0	0.0384615	0.0454545	0	0.047619	0.0153846	0.0322581	0.04	0	0.0121951	0.0357143	0.0181818	0.0566038	0	0
sif	3L	5739808	0.366451	0.595404	0.857561	0.937829	0.643688	1	1	1	24	7.5	0	0.415662	1	16	1	1	1	0.996248	1	0.995816	1	1	1	0.995327	1	1	1	1	1	0.989796
NaCP60E	2R	20802225	0.253222	0.602588	0.783755	0.912463	0.646434	1	0.244048	1	24	18	0	0.303824	1	12	0.461538	0.666667	0.380952	0.75	0.285714	0	0.5	0.714286	0.333333	0.375	0.642857	0.6	0.321429	0.333333	0.307692	0.411765
NaCP60E	2R	20798632	0.75796	0.602638	0.418332	0.968945	0.646453	1	0.434722	1	24	16.5	0.0757614	0.180973	1	16	0.47619	0.448276	0.583333	0.56	0.5625	0.516129	0.632184	0.619048	0.617978	0.522727	0.625	0.61194	0.471545	0.719512	0.531646	0.473684
CG3056	X	1267561	0.598899	0.604979	0.0657063	0.961019	0.647339	1	1	1	24	16.5	1.96262e-17	0.288866	1	24	0.469388	0.263158	0.666667	0.222222	0.433962	0.407407	0.470588	0.52381	0.535714	0.631579	0.266667	0.368421	0.509804	0.545455	0.4	0.428571
Ance-5	2R	20776479	0.636756	0.606261	0.390242	0.963251	0.647822	1	1	1	24	10.5	0.00793229	0.67962	1	12	0.121951	0.0357143	0.025641	0.0480769	0.0178571	0	0	0.0232558	0.0441176	0.0416667	0.030303	0.0232558	0	0.05	0.0149254	0
14-3-3zeta	2R	5996306	0.0303137	0.606583	0.674687	0.55513	0.647943	1	0.434722	1	24	0	0.0207852	0.467706	1	12	0.302326	0.231579	0.23397	0.260974	0.269058	0.276228	0.259185	0.269699	0.29572	0.236	0.273841	0.255064	0.306452	0.252951	0.250814	0.269945
kis	2L	214328	0.876741	0.609823	0.647211	0.973039	0.649157	1	1	1	24	10.5	0	0.929403	1	24	0.4	1	0.25	0.5	0.538462	0.454545	0.636364	0.55	0	0	0.75	0.25	0.590909	0.611111	0.4	1
bur	2L	21175590	0.985742	0.6123	0.98148	0.975949	0.65008	1	1	1	24	16.5	0.00261443	0.744368	1	16	0.0708661	0.111111	0.0782609	0.124528	0	0.00892857	0.025641	0.0145985	0.169643	0.128571	0.0833333	0.168539	0	0.010989	0.0421053	0
slo	3R	20501385	0.459033	0.613406	0.236743	0.949738	0.65049	1	0.124603	1	24	6	0	0.970972	1	24	0.927419	0.939394	0.960526	0.820896	0.988372	1	0.867257	0.916667	0.908333	0.859259	0.929936	0.897059	0.909722	0.928571	0.972973	0.92
nAcRbeta-64B	3L	4433319	0.745546	0.616169	0.799146	0.968444	0.651512	1	1	1	24	13.5	0	0.57068	1	24	0.238095	0	0.235294	0.352941	0.25	0.636364	0.433333	0.233333	0.25	0.666667	0.222222	0.391304	0.27907	0.26087	0.25	0.473684
CG4756	X	16682754	0.599596	0.617782	0.680498	0.961062	0.652105	1	1	1	24	4.5	0	0.407216	1	12	0.0392157	0	0.0151515	0.040404	0.0506329	0.0625	0.0430108	0.0373832	0.039604	0.03125	0.0196078	0.037037	0.0227273	0.039604	0.0490196	0.102041
CG9056	X	15772208	0.527791	0.620543	0.758867	0.955998	0.653116	1	0.184325	1	24	18	0.0337271	0.994112	1	16	0.03125	0	0.0666667	0.0789474	0	0	0.0588235	0.0217391	0.0425532	0.0666667	0.108696	0.0810811	0.02	0.0204082	0	0
CG2747	3R	3848991	0.970858	0.621168	0.681815	0.975589	0.653344	1	0.434722	1	24	15	0.0176777	0.209767	1	12	0.375	0.222222	0.363636	0.4	0.153846	0.333333	0.470588	0.166667	0.0714286	0.666667	0.1875	0.238095	0.416667	0.0555556	0.142857	0.3
CG42327	3R	7495991	0.224022	0.624007	0.90335	0.902169	0.654376	1	0.907937	1	24	0	3.06659e-19	1	1	48	0.00452489	0.00534759	0	0.00337458	0.00320513	0	0.00175593	0.00328587	0.00434783	0.00337838	0.003663	0.00454545	0.00299401	0.00154799	0	0.00469484
CG34352	X	9258636	0.235594	0.62538	0.853864	0.906526	0.654873	1	1	1	24	13.5	NA	0.955061	1	16	0	0	0	0	0	0	0	0.125	0	0	0	0.0555556	0	0	0	0
CG32245	3L	4586715	0.018142	0.628336	0.571973	0.427526	0.655938	1	0.434722	1	24	21	0.086122	0.760886	1	16	0.788462	0.666667	0.746032	0.903226	0.875	0.6	0.816092	0.74026	0.793103	0.724138	0.788732	0.814815	0.846939	0.706897	0.709302	0.870968
CG17124	2L	10745891	0.456761	0.632749	0.914091	0.949501	0.657515	1	1	1	24	13.5	0.00828565	0.936481	1	16	0.0754717	0.0769231	0.25	0.100358	0.0921053	0.0625	0.0444444	0.0849057	0.0806452	0.0740741	0.170732	0.158537	0.102273	0.102941	0.097561	0.112903
Sh	X	17824766	0.734866	0.636868	0.907501	0.968	0.658975	1	1	1	24	13.5	0	0.929503	1	12	0.423077	0	0.27027	0.333333	0.05	0.666667	0.162162	0.162162	0.153846	0.25	0.333333	0.0869565	0.157895	0.38	0.2	0.107143
Rya-r44F	2R	4755330	0.537079	0.637716	0.652629	0.956726	0.659274	1	1	1	24	16.5	0.0707107	0.614892	1	16	0	0	0.25	0.2	0	0	0	0	0.125	0	0.142857	0	0	0	0	0
CG11138	X	12466140	0.918663	0.644848	0.80741	0.974238	0.661768	1	1	1	24	7.5	0.0032033	0.514955	1	12	0.0693013	0.0819149	0.060241	0.0638686	0.0914513	0.0718884	0.0849359	0.0761259	0.0503569	0.0740338	0.0714873	0.0782288	0.0991162	0.0780669	0.110139	0.0730479
rab3-GEF	X	14992526	0.389196	0.651866	0.584129	0.941249	0.664187	1	1	1	24	10.5	0.117851	1	1	12	0.166667	0	0	0	0.2	0	0.25	0.333333	0.5	0.2	0.142857	0.153846	0.142857	0.0909091	0	0
p24-1	X	11746343	0.55786	0.653776	0.35104	0.958271	0.664839	1	1	1	24	7.5	0.101015	0.956133	1	24	0	0.0714286	0	0	0	0	0	0	0	0	0	0.0344828	0	0	0	0
CG1090	3R	191107	0.431164	0.655773	0.942527	0.946663	0.665518	1	1	1	24	16.5	0	0.824513	1	12	0.982456	1	0.981818	0.989474	0.94	0.966102	0.972789	0.985185	0.988889	1	0.981132	0.978495	0.923077	0.962617	0.934066	1
RpLP0	3L	22070328	0.700893	0.664702	0.636314	0.966501	0.668522	1	0.715476	1	24	6	0.108786	1	1	24	0.153846	0.2	0	0	0.0714286	0	0.0588235	0	0	0.285714	0	0.0909091	0.0235849	0	0.3	0
CG32627	X	13608141	0.568058	0.665177	0.615252	0.958989	0.66868	1	1	1	24	13.5	0	0.210024	1	12	0.285714	0	0.0769231	0	0	0.285714	0.1	0.166667	0.142857	0	0.0588235	0.181818	0.25	0	0	0.0714286
14-3-3zeta	2R	5996307	0.0196671	0.665342	0.915511	0.447387	0.668735	1	0.124603	1	24	10.5	0.0069167	0.712554	1	12	0.242888	0.187919	0.192685	0.197701	0.222032	0.192626	0.197309	0.217942	0.206349	0.207143	0.192086	0.193956	0.246154	0.183706	0.190134	0.206266
p24-1	X	11746351	0.560731	0.666581	0.349338	0.958476	0.669147	1	1	1	24	7.5	NA	0.811055	1	16	0	0	0	0	0.142857	0	0	0	0	0	0	0.0714286	0	0	0	0
Rpn9	3R	19557457	0.371279	0.687956	0.280254	0.938588	0.676097	1	1	1	24	13.5	0.141421	0.216955	1	16	0	0	0.1	0	0.0714286	0	0.0769231	0.03125	0.148148	0	0	0.0571429	0	0	0	0
CG17549	2L	19388240	0.723594	0.694031	0.362812	0.967518	0.678019	1	0.907937	1	24	18	0	0.187396	1	48	0.0434783	0	0	0.0869565	0	0	0.0434783	0	0	0.25	0	0	0.0357143	0	0	0
CG34355	3R	19674259	0.115094	0.697152	0.235878	0.825716	0.678998	1	0.0220238	1	24	21	0.111258	0.956735	1	24	0.666667	0.2	0.615385	0.772727	0.714286	0.5	0.689655	0.785714	0.59375	0.5	0.55102	0.568182	0.666667	0.761905	0.653846	0.857143
Ca-alpha1T	X	6001644	0.707323	0.70452	0.166253	0.966796	0.681285	1	1	1	24	16.5	0	0.844274	1	24	0.333333	0	0.5	0	0.181818	0.176471	0.212121	0.25641	0.030303	0.333333	0.272727	0.142857	0.118812	0.25	0.0555556	0.25
psq	2R	6498969	0.553213	0.711027	0.573907	0.957935	0.683278	1	1	1	24	10.5	0.0642824	0.306955	1	48	0	0	0	0.0909091	0.285714	0	0	0.0714286	0	0.111111	0	0.0588235	0.0952381	0	0.0555556	0
Sh	X	17824684	0.506337	0.712448	0.966261	0.954219	0.68371	1	1	1	24	10.5	0.0490158	0.67917	1	12	0.809524	0.470588	0.670886	0.702128	0.738095	0.783784	0.763889	0.818182	0.72619	0.416667	0.66129	0.735849	0.666667	0.789474	0.809524	0.745763
CG11737	3R	4346187	0.57007	0.712898	0.343926	0.959128	0.683847	1	1	1	24	13.5	0.0883883	0.366756	1	12	0	0	0.0625	0	0	0	0	0	0	0	0	0	0	0	0	0.111111
CG11138	X	12466151	0.99136	0.714082	0.732757	0.976082	0.684205	1	0.715476	1	24	4.5	0.00615826	0.818889	1	12	0.0661765	0.0739372	0.0539629	0.0652281	0.0814682	0.0709677	0.0717007	0.0698159	0.0453162	0.063772	0.068484	0.0717566	0.0957718	0.0704317	0.0908682	0.0698659
SelG	X	11781784	0.545956	0.714709	0.985101	0.9574	0.684395	1	1	1	24	7.5	0	1	1	24	0	0.0714286	0	0.105263	0.0526316	0	0	0	0	0	0	0.0740741	0.0526316	0.0384615	0	0
CG12213	3R	7791384	0.598629	0.718569	0.343339	0.961002	0.685557	1	1	1	24	16.5	0.00327364	0.920069	1	24	0	0	0.00925926	0.0447761	0	0	0	0	0.0925926	0	0	0	0	0	0	0
CG32627	X	13607572	0.26503	0.722053	0.260386	0.916036	0.686599	1	0.244048	1	24	15	0.00968342	0.969008	1	16	0.0736842	0.015625	0.0652174	0.0873786	0	0.0508475	0.0958904	0.0471698	0.0333333	0.0229885	0.0222222	0.07	0.0652174	0.0560748	0.0238095	0.101266
CG31012	3R	26651066	0.942829	0.727642	0.429266	0.974881	0.688256	1	1	1	24	10.5	0	0.0932445	1	48	0.0116279	0	0	0	0	0.0121951	0.0310078	0	0.00909091	0	0.00740741	0.0114943	0	0.0241935	0	0.0188679
Msp-300	2L	5144655	0.572814	0.728232	0.342372	0.959316	0.68843	1	1	1	24	13.5	NA	0.850759	1	12	0	0	0	0	0	0	0	0.142857	0	0	0	0	0	0	0.0833333	0
CG11255	3L	13013548	0.573282	0.730071	0.885757	0.959348	0.68897	1	1	1	24	13.5	0.00505076	0.109047	1	12	0.222222	0.3	0.272727	0.285714	0.3	0.6	0.625	0.833333	0.285714	0.285714	0.3125	0.25	0.4375	0.307692	0.428571	0.8
tutl	2L	4314576	0.869651	0.731256	0.562429	0.972825	0.689318	1	1	1	24	10.5	0	1	1	48	0.933333	0.864407	0.915888	0.938462	0.95122	0.967742	0.957746	0.873418	0.882353	0.931818	0.794118	0.941176	0.962733	0.897436	0.947368	0.966667
CG9330	3L	19579845	0.433017	0.732313	0.595618	0.946879	0.689627	1	1	1	24	7.5	0	0.376695	1	24	0	0.0666667	0	0.0357143	0	0	0	0	0	0	0	0	0	0	0	0.0666667
CG10077	3L	6943210	0.0430673	0.735528	0.114724	0.639359	0.690564	1	1	1	24	10.5	0	0.495269	1	16	0.201493	0.285714	0.169231	0.2	0.122642	0.306452	0.208	0.290909	0.21831	0.191304	0.219697	0.28125	0.191176	0.239437	0.232394	0.260417
pyd	3R	4662906	0.607516	0.743195	0.685146	0.96155	0.692775	1	1	1	24	16.5	0	0.573009	1	16	0.5	0.5	0	0.5	0	1	1	1	0.6	0.5	0.6	0.5625	0.666667	0.545455	0.5	1
syt	2L	2785542	0.0824281	0.746263	0.384521	0.772371	0.693652	1	1	1	24	10.5	0	0.126179	1	24	0.881266	0.914286	0.885337	0.916236	0.891304	0.905858	0.891399	0.888346	0.892433	0.895238	0.88716	0.922489	0.916279	0.911602	0.864917	0.901505
Spred	2R	10649523	0.164991	0.747121	0.479339	0.87166	0.693896	1	0.434722	1	24	0	0.134687	0.160335	1	24	0.357143	0.166667	0	0.2	0.4	0	0.2	0.0833333	0.142857	0	0	0.142857	0.392857	0.0769231	0.214286	0.666667
CG17735	3R	615229	0.313241	0.751688	0.22723	0.928029	0.695189	1	0.124603	1	24	18	0.0309682	0.441911	1	16	0	0	0	0.0218978	0	0	0.00636943	0.00763359	0	0	0.025974	0	0	0	0	0
Sh	X	17824691	0.759773	0.753092	0.70659	0.969017	0.695584	1	1	1	24	13.5	0.0198562	0.392434	1	24	0.878049	0.647059	0.934211	0.877551	0.904762	0.948718	0.915493	0.934211	0.925	0.875	0.866667	0.8	0.891304	0.92	0.928571	0.948276
GluClalpha	3R	15579486	0.88964	0.757382	0.876196	0.97342	0.696785	1	1	1	24	10.5	0	0.362345	1	24	0.909091	0.952381	0.910714	0.904762	0.892857	0.833333	0.766667	0.928571	0.9375	0.92	0.903846	0.793103	0.866667	0.875	0.895833	1
Rim	3R	13708487	0.00615459	0.761311	0.0730539	0.292219	0.697877	1	0.715476	1	24	18	0.0164261	0.288013	1	48	0.787115	0.802372	0.810345	0.851282	0.80695	0.862416	0.835479	0.847181	0.813901	0.894737	0.742097	0.875	0.755267	0.853425	0.769517	0.866817
CG12237	X	19535621	0.737454	0.77358	0.774167	0.968109	0.701237	1	1	1	24	16.5	0	0.435916	1	12	0.235294	0.411765	0.285714	0.235294	0.285714	0	0.526316	0.395349	0.565217	0.181818	0.318182	0.34375	0.222222	0.347826	0.3	0.285714
CG31302	3R	11225168	0.554996	0.789946	0.363725	0.958064	0.705605	1	1	1	24	13.5	0.53033	0.972741	1	16	0.25	0	0.25	0.75	0.5	0.5	0.352941	0.142857	0	1	0.4	0.6	0.3125	0.5	0	0.25
CG31772	2L	3762337	0.783785	0.790821	0.803921	0.969938	0.705835	1	1	1	24	4.5	0.0252538	0.862191	1	12	0.541667	0.5	0.44	0.428571	0.3125	0.28	0.371429	0.225806	0.342105	0.4	0.459459	0.4	0.375	0.434783	0.428571	0.366667
CG9056	X	15771480	0.754907	0.79146	0.281728	0.968823	0.706003	1	1	1	24	4.5	0.0471405	0.417532	1	12	0.3	0.222222	0.166667	0	0.142857	0	0	0	0	0.0714286	0.25	0.235294	0.0810811	0	0.0714286	0
CG42347	2R	5611069	0.648642	0.801316	0.4577	0.9639	0.708565	1	1	1	24	10.5	0	0.701439	1	24	0.153846	0.111111	0	0	0	0.125	0.5	0	0.2	0	0.166667	0.3	0	0.0909091	0.142857	0.142857
DIP1	X	21496263	0.687029	0.81029	0.235584	0.965848	0.710859	1	1	1	24	10.5	0.0141421	0.336076	1	12	0	0	0	0.02	0.0227273	0	0	0.00900901	0	0.04	0	0	0	0	0	0
CG6966	3R	10921252	0.450847	0.824284	0.928084	0.948872	0.714366	1	1	1	24	16.5	0	0.12206	1	12	0	0.09375	0.0151515	0.0697674	0	0	0	0.0151515	0.0227273	0.0625	0	0.115385	0.0190476	0	0.0135135	0
TSG101	3L	16837495	0.102202	0.838698	0.393114	0.807954	0.71789	1	0.575099	1	24	6	0.0174594	0.638819	1	24	0	0.0123457	0	0	0	0.0060241	0	0	0.00613497	0.00884956	0	0.00632911	0	0	0	0
slo	3R	20533418	0.269351	0.84413	0.50449	0.917271	0.719196	1	0.244048	1	24	10.5	0.0548662	0.37961	1	24	0.285714	0.214286	0.208122	0.380952	0.278481	0.229508	0.252336	0.268085	0.21097	0.19697	0.276498	0.307087	0.252366	0.358209	0.25	0.307692
ftz-f1	3L	18748272	0.720543	0.851608	0.739396	0.967385	0.720973	1	1	1	24	13.5	0.0339955	0.913818	1	16	0	0.25	0.176471	0.153846	0	0	0	0.05	0.125	0.111111	0.0526316	0.04	0.0151515	0.0588235	0.116279	0.0434783
para	X	16358752	0.575725	0.852198	0.661672	0.959513	0.721113	1	1	1	24	10.5	3.92523e-17	0.212255	1	16	0.9	0.914286	0.925	0.891304	0.901961	0.709677	0.846154	0.904348	0.885714	0.87037	0.825503	0.875	0.886598	0.887755	0.882353	0.924242
CG18437	3R	23499011	0.815179	0.864333	0.277513	0.971062	0.723947	1	1	1	24	16.5	0	0.785476	1	48	0.880952	0.75	0.839506	0.751592	0.690909	0.794118	0.809524	0.823204	0.794326	0.783784	0.691057	0.846715	0.810526	0.819277	0.743243	0.811594
CG4756	X	16682747	0.651086	0.8666	0.522651	0.964031	0.72447	1	1	1	24	10.5	0.00661731	0.431606	1	16	0.136364	0	0.117647	0.125	0.0746269	0.12963	0.0131579	0.126316	0.117647	0.0196078	0.0869565	0.0869565	0.0735294	0.0843373	0.163043	0.0540541
CG32627	X	13608132	0.253869	0.867231	0.0521994	0.912667	0.724616	1	1	1	24	7.5	0.0220971	0.109294	1	12	0	0.142857	0.0625	0	0	0.125	0	0.0833333	0.0625	0	0	0	0.25	0.0625	0	0
boss	3R	21791365	0.568944	0.869708	0.829446	0.95905	0.725184	1	1	1	24	13.5	0.0214275	0.21857	1	24	1	0.875	0.939394	1	0.962963	1	1	1	1	0.969697	0.961538	0.979381	0.888889	0.945946	1	1
Ih	2R	10184437	0.0715417	0.873598	0.964208	0.746513	0.726073	1	0.575099	1	24	18	0.202031	0.382847	1	12	0	0	0	0.142857	0	0	0	0.0769231	0	0	0	0	0.0555556	0	0	0.2
CG7097	2R	15113163	0.288933	0.879957	0.153185	0.922443	0.727513	1	0.575099	1	24	12	0.235702	0.303409	1	16	0	0.333333	0.333333	0	0	0	0.25	0.222222	0.333333	0	0.333333	0.1	0.25	0.1	0.1	0
CG11412	X	1236554	0.759659	0.880382	0.614112	0.969012	0.727609	1	1	1	24	10.5	0.00676612	0.375846	1	12	0.0238095	0.0285714	0.0549451	0.00943396	0.00970874	0	0.0133333	0.0114943	0.0684932	0.0147059	0.016129	0.025641	0	0	0.0149254	0.025
cac	X	11833797	0.647401	0.884498	0.765158	0.963834	0.728532	1	1	1	24	13.5	0.0392837	1	1	24	0.111111	0	0	0.5	0	0.333333	0.285714	0	0.0769231	0	0.125	0.125	0.238095	0	0.222222	0.333333
CG33205	3L	9826394	0.346082	0.884608	0.660081	0.93441	0.728557	1	1	1	24	13.5	0.202031	0.621378	1	16	0	0	0	0.142857	0	0	0	0	0	0	0	0.0555556	0	0	0.0625	0
CG15628	2L	4822420	0.786962	0.884918	0.843492	0.970055	0.728626	1	1	1	24	13.5	0	0.0642774	1	24	0.0237069	0.042735	0.0144231	0.0203046	0.0180723	0.0166667	0.0550459	0.020979	0.0138408	0.0241546	0.0292208	0.0128617	0.0254777	0.0207254	0.0274725	0.048951
Ndae1	2L	7230012	0.302911	0.885886	0.482768	0.925756	0.728842	1	0.339385	1	24	6	0.0723177	0.944357	1	16	0.727273	1	0.625	0.7	1	0.833333	0.818182	0.8	0.6	1	0.444444	0.857143	0.705882	1	1	1
CG32103	3L	12405175	0.470713	0.894629	0.54295	0.950924	0.730779	1	0.434722	1	24	15	2.45327e-18	0.95692	1	16	0.0243902	0.0275229	0.0181818	0.0434783	0	0.0192308	0.0857143	0.0357143	0.025974	0.0775194	0.0258621	0.020202	0.01	0.0243902	0.0298507	0.0537634
Ca-alpha1T	X	6003904	0.746523	0.898127	0.772416	0.968484	0.731546	1	1	1	24	10.5	0.0174921	0.810068	1	12	0.342857	0.26087	0.285714	0.310345	0.137931	0.192308	0.125	0.219178	0.196078	0.137931	0.192982	0.285714	0.166667	0.25	0.340426	0.259259
CG17838	3R	16618055	0.786427	0.903587	0.515643	0.970036	0.732735	1	1	1	24	13.5	0	0.710618	1	24	0	0.0909091	0	0.142857	0	0	0	0	0.0666667	0	0	0	0	0.0909091	0.05	0
CG1552	X	10946831	0.859503	0.907987	0.73309	0.972513	0.733685	1	1	1	24	10.5	0.0883883	0.428616	1	12	0.333333	0	0	0.25	0.2	0.333333	0.166667	0.142857	0	0	0	0.111111	0.2	0.333333	0.375	0.5
PIP82	X	8422341	0.243993	0.90849	0.970972	0.909452	0.733793	1	0.434722	1	24	15	0.00402793	0.651296	1	16	0	0.00197628	0.00767263	0.00645651	0.00154799	0.00223881	0.000640615	0.00287356	0.00107527	0.00414594	0.00524246	0.00635497	0	0.00178678	0.00158856	0.00200401
DIP1	X	21500752	0.0709901	0.910804	0.439684	0.745046	0.73429	1	0.244048	1	24	18	0.0148158	0.670696	1	48	0.572478	0.451484	0.593431	0.476258	0.559826	0.518072	0.599298	0.601355	0.55218	0.486421	0.548091	0.557009	0.551282	0.518925	0.54649	0.594372
CG14882	3R	12269403	0.343828	0.912831	0.723254	0.934009	0.734723	1	1	1	24	13.5	NA	1	1	12	0	0	0	0	0	0	0.166667	0	0	0	0.0909091	0	0	0.1	0	0
CG14935	2L	11852450	0.789034	0.915047	0.705309	0.970132	0.735195	1	1	1	24	10.5	0.00754712	0.175575	1	48	0.0869565	0.0588235	0.047619	0.0689655	0	0	0.0344828	0	0	0.0952381	0.0909091	0.0833333	0	0	0.047619	0
CG13244	2L	15917444	0.98494	0.9216	0.371348	0.975929	0.736582	1	1	1	24	13.5	0	1	1	12	0.333333	0	0.142857	0	0	0	0.222222	0.285714	0.125	0.5	0	0.142857	0.047619	0	0	0.1
CSN4	2R	3861200	0.218044	0.923237	0.751136	0.899756	0.736927	1	1	1	24	13.5	NA	0.997619	1	24	0	0	0	0	0	0	0.0833333	0	0	0	0.0178571	0	0	0	0.0263158	0.030303
Msp-300	2L	5132837	0.225147	0.924967	0.732745	0.902611	0.737289	1	0.715476	1	24	21	0.202031	0.94661	1	12	0.142857	0	0	0	0.363636	0	0.181818	0.5	0.25	0	0.111111	0.2	0.375	0.1	0.214286	0
NAT1	2R	8806911	0.155182	0.925553	0.198114	0.864645	0.737412	1	0.907937	1	24	16.5	0.0174594	0.419852	1	48	0	0	0.0666667	0.0246914	0.0263158	0	0.0288462	0.0465116	0.0545455	0	0.0289855	0.0300752	0.029703	0.027027	0.0294118	0
CG33472	2R	7335112	0.236408	0.926413	0.300378	0.906817	0.737592	1	0.715476	1	24	18	0.00828939	0.352918	1	24	0.942913	0.934866	0.946589	0.962579	0.955056	0.958298	0.954043	0.958265	0.946099	0.958786	0.94747	0.959139	0.939523	0.960245	0.948795	0.94968
CG9674	3L	16786754	0.537514	0.948514	0.716343	0.95676	0.742129	1	1	1	24	13.5	0.00166203	0.588099	1	24	0	0.0124224	0.0113636	0.0171233	0.00383142	0.010582	0.0017452	0.00714286	0.0157343	0.00597015	0.00219298	0.0169231	0	0.00785855	0.0097561	0.00403226
CG33205	3L	9826400	0.751699	0.949723	0.632406	0.968695	0.742373	1	1	1	24	4.5	NA	0.100707	1	12	0	0	0	0	0.142857	0.2	0	0	0.0714286	0	0	0.0555556	0	0.0714286	0.125	0
CG4623	3L	5137306	0.0950313	0.951832	0.511855	0.796413	0.742797	1	0.907937	1	24	10.5	0	0.591131	1	48	0	0.0144928	0.0114943	0.0289256	0	0.0215054	0.0111111	0.00680272	0.00694444	0.00485437	0.00990099	0.0316742	0.00561798	0.0110497	0.0144928	0.0117647
l(2)gl	2L	12405	0.58504	0.952654	0.58294	0.960132	0.742962	1	1	1	24	10.5	0.0261891	0.758505	1	48	0	0	0	0.037037	0.0263158	0	0	0	0.0357143	0.0238095	0	0	0	0	0	0
qkr58E-2	2R	18304511	0.313243	0.956937	0.059146	0.928029	0.743818	1	0.575099	1	24	21	0.157135	0.999167	1	12	0	0	0	0.111111	0	0	0	0.142857	0.166667	0	0	0	0	0.0769231	0	0
CG18437	3R	23498893	0.392574	0.958314	0.251439	0.941725	0.744091	1	1	1	24	7.5	0.0281591	0.563261	1	16	0.18	0	0.0307692	0.079646	0.130435	0.142857	0.0944882	0.0760234	0.0928571	0.0638298	0.137405	0.132812	0.0645161	0.0403226	0.0649351	0.12766
CG3764	3L	16992953	0.7569	0.964274	0.878619	0.968903	0.74527	1	0.907937	1	24	0	1.96262e-17	0.976962	1	24	0.153846	0.2	0	0.1	0.0625	0	0.0869565	0.133333	0	0.1	0.117647	0.333333	0.125	0	0.04	0
Shab	3L	2941312	0.795877	0.966672	0.782262	0.970381	0.745741	1	1	1	24	7.5	0.0195968	0.00245052	1	24	0.892308	0.906977	0.836879	0.850746	0.875	0.708333	0.889655	0.844156	0.860465	0.844156	0.811518	0.891089	0.865248	0.87037	0.862595	0.808511
CG32627	X	13607590	0.549713	0.973449	0.247866	0.957678	0.747064	1	1	1	24	13.5	0	0.208173	1	16	0.04	0.0612245	0.0263158	0.0721649	0	0.0408163	0.0724638	0.0291262	0.045977	0.0153846	0.0410959	0.047619	0.0625	0.030303	0.016129	0.08
CG5805	3R	20611257	0.780721	0.979129	0.897043	0.969823	0.748162	1	1	1	24	7.5	0	0.134379	1	16	0	0	0.0454545	0	0.0384615	0.0526316	0	0.0344828	0.0634921	0.08	0	0	0	0	0.03125	0
eIF4G	4	940858	0.889467	0.981971	0.974531	0.973414	0.748707	1	1	1	24	10.5	0.00461368	0.17577	1	24	0.073913	0.0673077	0.060166	0.0803571	0.0154242	0.0122249	0.0130152	0.0124555	0.0846995	0.0520231	0.0414201	0.0679348	0.0294118	0.0317797	0.0123077	0.0185874
L	2R	10384228	0.580764	0.990153	0.787627	0.95985	0.750265	1	1	1	24	16.5	0.00841794	0.333426	1	48	0	0	0.0238095	0.0533333	0.0178571	0	0	0	0	0	0.0526316	0.02	0.0212766	0	0	0
Ca-beta	2L	11159902	0.302112	0.9918	0.929803	0.925575	0.750577	1	0.434722	1	24	18	0.0194795	0.934833	1	12	0.305785	0.166667	0.245098	0.333333	0.301587	0.274194	0.359116	0.282178	0.286486	0.234375	0.356725	0.292683	0.301255	0.268041	0.22695	0.303704
CG34220	2R	5929235	0.502793	0.99655	0.322403	0.953911	0.75147	1	0.434722	1	24	3	0.0243645	0.716491	1	24	0.111111	0.08	0	0.0766546	0.1	0.166667	0.0754717	0.0731707	0.057971	0.0967742	0.0454545	0.0689655	0.0625	0.121212	0.192308	0.037037
eys	2L	2327498	0.617287	0.997101	0.818096	0.962136	0.751573	1	1	1	24	10.5	0.0176777	0.771266	1	12	0.142857	0.2	0	0.25	0	0	0	0	0.333333	0.166667	0	0.0909091	0	0	0	0
CG13631	3R	20595588	0.995351	0.997903	0.99646	0.976175	0.751723	1	1	1	24	16.5	0	0.0677491	1	24	0.273879	0.219271	0.239539	0.180553	0.0211183	0.0197701	0.0268401	0.0241451	0.222549	0.229945	0.23637	0.201062	0.0209818	0.0231846	0.0299753	0.0425926
ttv	2R	10471078	0.823775	0.998861	0.974858	0.971355	0.751902	1	1	1	24	10.5	0	0.0179673	1	48	0.5	0.4	0.75	0.5	0.5	0	0	0.0909091	0.6	0.5	0.625	0.625	0.222222	0	0	0.166667
gry	3L	3210260	NA	NA	NA	NA	NA	NA	1	1	24	13.5	NA	1	1	48	0	0	0	0	0	0	0	0	0	0	0	0	0	0	0	0
Prosbeta5	2R	6708460	NA	NA	NA	NA	NA	NA	1	1	24	13.5	NA	1	1	48	0	0	0	0	0	0	0	0	0	0	0	0	0	0	0	0
CG33171	3L	7044683	NA	NA	NA	NA	NA	NA	1	1	24	13.5	NA	1	1	48	1	1	1	1	1	1	1	1	1	1	1	1	1	1	1	1
TepII	2L	7695350	NA	NA	NA	NA	NA	NA	1	1	24	13.5	NA	1	1	48	0	0	0	0	0	0	0	0	0	0	0	0	0	0	0	0
mfas	3R	7818499	NA	NA	NA	NA	NA	NA	1	1	24	13.5	NA	1	1	48	0	0	0	0	0	0	0	0	0	0	0	0	0	0	0	0
CG7231	2L	7986277	NA	NA	NA	NA	NA	NA	1	1	24	13.5	NA	1	1	48	0	0	0	0	0	0	0	0	0	0	0	0	0	0	0	0
CG18661	2L	8998342	NA	NA	NA	NA	NA	NA	1	1	24	13.5	NA	1	1	48	1	1	1	1	1	1	1	1	1	1	1	1	1	1	1	1
CG33205	3L	9826391	NA	NA	NA	NA	NA	NA	1	1	24	13.5	NA	1	1	48	0	0	0	0	0	0	0	0	0	0	0	0	0	0	0	0
CG33205	3L	9826464	NA	NA	NA	NA	NA	NA	1	1	24	13.5	NA	1	1	48	0	0	0	0	0	0	0	0	0	0	0	0	0	0	0	0
CkIIbeta	X	11687115	NA	NA	NA	NA	NA	NA	1	1	24	13.5	NA	1	1	48	0	0	0	0	0	0	0	0	0	0	0	0	0	0	0	0
rut	X	14687368	NA	NA	NA	NA	NA	NA	1	1	24	13.5	NA	1	1	48	1	1	1	1	1	1	1	1	1	1	1	1	1	1	1	1
Rab1	3R	17094717	NA	NA	NA	NA	NA	NA	1	1	24	13.5	NA	1	1	48	0	0	0	0	0	0	0	0	0	0	0	0	0	0	0	0
beta-Spec	X	17559946	NA	NA	NA	NA	NA	NA	1	1	24	13.5	NA	1	1	48	0	0	0	0	0	0	0	0	0	0	0	0	0	0	0	0
CG7206	X	17983762	NA	NA	NA	NA	NA	NA	1	1	24	13.5	NA	1	1	48	0	0	0	0	0	0	0	0	0	0	0	0	0	0	0	0
CG17111	3R	18888617	NA	NA	NA	NA	NA	NA	1	1	24	13.5	NA	1	1	48	0	0	0	0	0	0	0	0	0	0	0	0	0	0	0	0
swm	2L	19495999	NA	NA	NA	NA	NA	NA	1	1	24	13.5	NA	1	1	48	0	0	0	0	0	0	0	0	0	0	0	0	0	0	0	0
OstStt3	3R	20895278	NA	NA	NA	NA	NA	NA	1	1	24	13.5	NA	1	1	48	0	0	0	0	0	0	0	0	0	0	0	0	0	0	0	0
CG42235	3R	21737197	NA	NA	NA	NA	NA	NA	1	1	24	13.5	NA	1	1	48	0	0	0	0	0	0	0	0	0	0	0	0	0	0	0	0
Gp93	3R	23777320	NA	NA	NA	NA	NA	NA	1	1	24	13.5	NA	1	1	48	0	0	0	0	0	0	0	0	0	0	0	0	0	0	0	0
