# Supplementary material for: Deep sequencing the circadian and diurnal transcriptome ofDrosophilabrain
Source: HighWire-hosted journal article supplement (doi:10.1101/gr.128876.111), 2012-04-03
Supplement: Table_S16.xlsx [file Table_S16.xlsx]

## Sheet: Sheet1
Host Gene	snoRNA	sequence	reverse complement exact match (12bp upstream of box)
Uhg1	snoRNA:Me28S-G3081a-RA	CTTACATGATGATTTTATTCGTACCGCCCCAGTCTGAAGAGACGTGTTGATTGGTTATTTATACTGATA	Drosophila melanogaster helix loop helix protein 4C (HLH4C)
	snoRNA:Me28S-A3407a-RA	ACTCAATGATGAAACATTTACCCAGCTCGCTTTGATATTCAATGAAGAGAACTGTTCCATATCCAACGCAAAAATAAACTGCTGACT	Drosophila melanogaster CG31904 (CG31904)
			Drosophila melanogaster MstProx (MstProx)
			Drosophila melanogaster CG17597 (CG17597)
	snoRNA:Me28S-A1666a-RA	TGTAAATGATGATTTATTATTATTTGCTACTCTTGAAGGTCATTGATGAATACTTTCACCTTAAAACCTGATG	Drosophila melanogaster HDAC4 (HDAC4)
			Drosophila melanogaster CG34417 (CG34417)
			Drosophila melanogaster CG32235 (CG32235)
			Drosophila melanogaster CG3077 (CG3077)
	snoRNA:U29:54Eb-RA	TTAGTATGATGAAACATTTACCCAGCTCGCTTTGATTTCTATGAAGAGAACTGTTCCATATCCAACGCAAAAATAACTTGCTGACT	Drosophila melanogaster CG13671 (CG13671)
			Drosophila melanogaster G protein gamma 1 (Ggamma1)
	snoRNA:U29:54Ec-RA	TTTGTATGATGAAACATTTACCCAGCTCGCTTTGATTTCTATGAAGAAAACTGTTCCATATCCAACGCAAAAAATTATCTTGCTGACT	Drosophila melanogaster CG14423 (CG14423)
	snoRNA:U76:54Eb-RA	TGAAAATGATGATTAATTATTATTTGCTACTCTTGAAGAGCTTTGATGAATACTTACACCTTAGAAACTGAGT	no exact matches
	snoRNA:U29:54Ed-RA	AAAGTATGATGAAACATTTACCCAGCTCGCTTTGATATACAATGAAGAGAACTGTTCCATATCCAACGCAAAACTAAAATGCTGATT	Drosophila melanogaster Pheromone-binding protein-related protein 1 (Pbprp1)
			Drosophila melanogaster CG6045 (CG6045)
			Drosophila melanogaster CG7637 (CG7637)
			Drosophila melanogaster CG7785 (CG7785)
			Drosophila melanogaster CG4306 (CG4306)
			Drosophila melanogaster scalloped (sd)
			Drosophila melanogaster CG34160 (CG34160)
			Drosophila melanogaster Cullin-3 (Cul-3)
			Drosophila melanogaster CG9168 (CG9168)
	snoRNA:U27:54Ea-RA	GTTCTGTGATGTCAAACCAATAGACAAGCATATAACCGAACAATCATGTTGATTTTCACACGACTGAGC	Drosophila melanogaster kekkon-1 (kek1)
			Drosophila melanogaster CG4230 (CG4230)
			Drosophila melanogaster CG11929 (CG11929)
			Drosophila melanogaster CG10373 (CG10373)
			Drosophila melanogaster toutatis (tou)
	snoRNA:Me28S-G3277a-RA	GGGCAATGATGAACACTTTATTTAAGCCAAACAGTTATCCCTGTCATAAGAATAATTGATGATAAAAGTTGCTGATT	Drosophila melanogaster CG10011 (CG10011)
	snoRNA:snR38:54Eb-RA	CCTTTGTGATGAGCATCCTTTTAAAGCCAAACAGTTATCCCTGTCATAAGAATAATTGATGATACAATAATCTGAC	Drosophila melanogaster CG33767 (CG33767)
			Drosophila melanogaster CG31676 (CG31676)
	snoRNA:U31:54Eb-RA	TTTTTATGATGATTTCGTATACCGCCCCAGTCGGAGAAATGATGTCGATTGGAATTATTTACTGATT	Drosophila melanogaster CG7906 (CG7906)
	snoRNA:U31:54Ec-RA	TTTTTGTGATGATTTCGTATACCGCCCCAGTCGGAGAAATGATGTCGATTGGAATAATATACTGATA	Drosophila melanogaster CG4546 (CG4546)
			Drosophila melanogaster tau (tau)
			Drosophila melanogaster CG18744 (CG18744)
	snoRNA:U31:54Ed-RA	ATATTATGATGATTAAGGATACCGCCCCAGTCGGAGAAATTATGTCGATTGGTTAAACATACTGACT	Drosophila melanogaster derailed (drl)
			Drosophila melanogaster Mo25 (Mo25)
			Drosophila melanogaster CG31680 (CG31680)
	snoRNA:U27:54Eb-RA	TTTTTCTGATGACAAACCAATAGACAAGCATATACCTGAATTCACGTGTGTTGCTAACATTTTTGACTGAAC	Drosophila melanogaster janus B (janB)
			Drosophila melanogaster CG17030 (CG17030)
			Drosophila melanogaster CG31735 (CG31735)
			Drosophila melanogaster CG31735 (CG31735)
			Drosophila melanogaster big bang (bbg)
			Drosophila melanogaster methuselah-like 2 (mthl2)
			Drosophila melanogaster UGP (UGP)
	snoRNA:snR38:54Ec-RA	ATGATGTGATGAACACCTTATTTAAGCCAAACAGTTATCCCTGTCATAAGAATAATTGATGATATATTCAGCTGACA	Drosophila melanogaster CG18213 (CG18213)
			Drosophila melanogaster CG42321 (CG42321)
	snoRNA:Me18S-A28a-RA	TTTTCTTGATGAAAACCTAGACAAGCATATAGCTGAATTTCTCTGTCGACAACTCACGCGACTGATC	Drosophila melanogaster Ecdysone-dependent gene 91 (Edg91)
Uhg2	snoRNA:U14:30Eb-RA	ATAAACTGATGATTACCTTAAACACCTTTTGCGGTTTCCACCAGAAAGCTTCGGCTTAAGGATGGTCTAAGGCGTCTGACT	no exact matches
	snoRNA:U14:30Ea-RA	TTTTACTGATGATTAACTTCAACACCTTTTGCGGTTTCCACCAGAAAGCTTCGGCTTAATGATGGTCTAAGGCGTCTGACT	no exact matches
	snoRNA:Me18S-G1620-RA	CTTCTCTGATGATCTTTTACACAGACCTGTACTGAGCTCATAACCGTGCAGAAAATTGTAAACTGAAA	Drosophila melanogaster CG13305 (CG13305)
			Drosophila melanogaster CG12950 (CG12950)
			Drosophila melanogaster fused lobes (fdl)
			Drosophila melanogaster Insulin-like receptor (InR)
			Drosophila melanogaster liquid facets-Related (lqfR)
			Drosophila melanogaster tetraspanin 39D (Tsp39D)
			Drosophila melanogaster CG6981 (CG6981)
	snoRNA:Me18S-A1576-RA	CTCAAATGATGAAACAGATGACGAGACTGAAGGAACAAATTCTCGACTTGGCGCTGTATTTTTCAGTGCCTCGTTATATATTTGTTCATTTAAGATGATTCGGCGATCTGATG	Drosophila melanogaster N-myristoyl transferase (Nmt)
			Drosophila melanogaster CG1965 (CG1965)
			Drosophila melanogaster TATA box binding protein-related factor 2 (Trf2)
Uhg3	snoRNA:Me28S-C2645a-RA	ACAACCATGATGAAATCGTTAGATGGGGACAACTGATTACTGTGACTGATTCATCTCGATAGTAGATCTGATTTT	Drosophila melanogaster combgap (cg)
	snoRNA:Me28S-C2645b-RA	TTTTTTGTGATGAAATCGTTAGATAGGGACGTCTGATATCTGTGACTGATTTATCTCGATAGTAGATCTGATTTT	Drosophila melanogaster combgap (cg)
	snoRNA:Me28S-C2645c-RA	TTTTTTGTGATGAAATCGTTAGATAGGGACGTCTGATATCTGTGACTGATTTATCTCGATAGTAGATCTGATTTT	Drosophila melanogaster combgap (cg)
Uhg4	snoRNA:Psi28S-2949-RA	AGTGCAGCGATTATAACTGCAAATCGAGTTCTACTGGCTTGTTTGCAGAACTCAATGTTGCAAGATTAATTTGTGATGCGCAGGGAAATGCACTTCACCGATTGCAATTCAAATTGCAGTCACGTGGTCGAGATTCCATTGCAGTCTCAACAAAT	box H/ACA
	snoRNA:Or-aca5-RA	ATGCGAGCATGAGTCGCTGGTGTAAAGAAACTACTACTTTAGCTAGTGCTTTTTACTTGCTCGCAGAAAAACGTGCTTTGCCCAAGCATAACCCAAATTTAAAAAACCCGAGTTTGCGGTGCATATTATTTTCGTGAAGCTGACAGTT	Drosophila melanogaster muscleblind (mbl)
			Drosophila melanogaster like Sm protein 4 (LSm-4)
			Drosophila melanogaster CG17768 (CG17768)
	snoRNA:Me28S-G3255a-RA	AGTTATCTGATGATTTATAATTCTATTTTCTGACATCTCTTATGAACCGTTGTGATTCAAATCAGTTATAACTAATTCTGACACA	Drosophila melanogaster adenosine 3 (ade3)
			Drosophila melanogaster CG13868 (CG13868)
			Drosophila melanogaster CG11786 (CG11786)
			Drosophila melanogaster CG42672 (CG42672)
			Drosophila melanogaster CG5355 (CG5355)
	snoRNA:Me28S-A982a-RA	AATTTCGTGATGAATGACCCTATCATCATCTTTCGACTGAAAATCATTTTGATGCTATACTAGTTTTCACTGAATTT	Drosophila melanogaster immune induced molecule 2 (IM2)
			Drosophila melanogaster CG16970 (CG16970)
	snoRNA:Me28S-A982b-RA	TGTGTTGTGATGAATGAAACTTACACCATCTTTCGACTGAAAAATGTTATGAAGCTATACGAGTTTTTACTGAAACC	Drosophila melanogaster trehalase (Treh)
			Drosophila melanogaster CG14286 (CG14286)
			Drosophila melanogaster alan shepard (shep)
	snoRNA:Me28S-G3255b-RA	ATGTAAATGATGCTTTTAAAATTTCTGACATCTCTAATGAACCGTTGTGATTCAAATTTTTCTAATATAATTAACTGATCAT	Drosophila melanogaster Blastoderm-specific gene 25D (Bsg25D)
			Drosophila melanogaster igloo (igl)
			Drosophila melanogaster CG30007 (CG30007)
			Drosophila melanogaster dysfusion (dys)
			Drosophila melanogaster CG3590 (CG3590)
			Drosophila melanogaster gilgamesh (gish)
			Drosophila melanogaster CG8097 (CG8097)
	snoRNA:Or-CD2-RA	ATTTCAATGATGATCACTTAAACCATTCACAGACACCATATAAAGGTCAAGCGCTGGCAATCTTCTTCAATATTCTTTTGGAGATAGAGCGTCTTGTTTGACTGGTTATGGGCCCTGGTTAAAAACTTGGCACTGAGCTT	Drosophila melanogaster odorant receptor 42a (Or42a)
			Drosophila melanogaster CG8078 (CG8078)
			Drosophila melanogaster Homocysteine-induced endoplasmic reticulum protein (Herp)
			Drosophila melanogaster takeout (to)
Uhg5	snoRNA:Me18S-C1366-RA	AGTTACTTGATGATTGTTCTTTTTCTGAAGAGTCGAGTGCCAAGTCGCAAGATTTGGCATTCTTTTCCTGTAGAAAGAATAAGAACGGCCAACTGATAAA	Drosophila melanogaster CG3814 (CG3814)
			Drosophila melanogaster CG12784 (CG12784)
	snoRNA:Me28S-C3227a-RA	GTTTTTCTGATGATAAGTTCAATCTGAACAAAGTGCTGTTGATTTACAACTTAAAATTAAACCAAAAGGATTCTGATAAA	Drosophila melanogaster acyl-Coenzyme A oxidase at 57D proximal (Acox57D-p)
			Drosophila melanogaster CG16922 (CG16922)
			Drosophila melanogaster O-fucosyltransferase 1 (O-fut1)
			Drosophila melanogaster CG11055 (CG11055)
	snoRNA:Me28S-C3227b-RA	TTGTACCTGATGATAAGTTTAATCTGAACAAAGTGCTGTTGATTCACAACTTAAAATTAAACCAAAAGGATTCTGAAATC	Drosophila melanogaster acyl-Coenzyme A oxidase at 57D proximal (Acox57D-p)
			Drosophila melanogaster CG16922 (CG16922)
			Drosophila melanogaster O-fucosyltransferase 1 (O-fut1)
			Drosophila melanogaster CG11055 (CG11055)
	snoRNA:Me28S-U1848-RA	GTTTAATTGATGATAAGTAATTACCGTTTGATATCCGTGATATTAAACCCCAAGGCTGCTATTTAATAGTAACTGATTCG	Drosophila melanogaster Nedd4 (Nedd4)
			Drosophila melanogaster CG14408 (CG14408)
			Drosophila melanogaster CG31176 (CG31176)
			Drosophila melanogaster ionotropic receptor 7c (Ir7c)
			Drosophila melanogaster TATA binding protein (Tbp)
	snoRNA:Me18S-G1952-RA	TTTTTATTGATGAAAGTAATTACCGTACGACTTTTGTGATTAAATTTAAATGGCTGCAAATTTTGCAACTGAAATT	Drosophila melanogaster multiple ankyrin repeats single KH domain (mask)
			Drosophila melanogaster sprint (spri)
			Drosophila melanogaster ia2 (ia2)
	snoRNA:Me18S-A1061-RA	GTTTAAATGATGAATACCTTTATCTATTAACTTTCGTTCTACTGAGTGGTAAATGCGGATATATTTTTCTGATTCA	Drosophila melanogaster UDP-glycosyltransferase 37c1 (Ugt37c1)
			Drosophila melanogaster CG14290 (CG14290)
			Drosophila melanogaster Actin-related protein 5 (Arp5)
			Drosophila melanogaster CG42666 (CG42666)
	snoRNA:Me28S-A992-RA	GTTTATATGATGTTACTTCTAGTATAGTTCATTAGAAACACACATGTTACAAACTTTTCGAAGCTGATATA	Drosophila melanogaster narrow abdomen (na)
			Drosophila melanogaster CG13577 (CG13577)
			Drosophila melanogaster CG14506 (CG14506)
			Drosophila melanogaster rab3-GEF (rab3-GEF)
	snoRNA:Me28S-G2703a-RA	TTTCATATGATGAAATTTTCCTATCTCAGGATTCCCTCTTCTGAGTAGAACCCTAAAACAACCGTGCTGTTCACTTTCCCTGTCTGAAATA	Drosophila melanogaster GTPase-activating protein 1 (Gap1)
			Drosophila melanogaster Fish-lips (Fili)
			Drosophila melanogaster alpha-Esterase-9 (alpha-Est9)
	snoRNA:Me28S-G2703b-RA	TTTAGAATGATGATATTTTCCGTCCGTGGAACTTATACAAAGTAAAATCATGCTGACATTTTATGTCTTCTTTCCCCAACTGATTAT	Drosophila melanogaster checkpoint suppressor homologue (CHES-1-like)
			Drosophila melanogaster liquid facets (lqf)
			Drosophila melanogaster CG10486 (CG10486)
	snoRNA:Me28S-G2703c-RA	TTCGAAATGATGACAATACAGTCCGTGGTTTTACACTGAGACAAAGCCATGCTGTTTGATAAGTCATTTTTCCCCAACTGATACA	Drosophila melanogaster mitochondrial Rho (Miro)
			Drosophila melanogaster CG6639 (CG6639)
			Drosophila melanogaster CG15020 (CG15020)
			Drosophila melanogaster molecule interacting with CasL (Mical)
	snoRNA:Or-CD4-RA	TTTAAAATGAGGAAAAAAAAGTCCGATATTTTTACTGAGCAAATCCATGCTGTATAAGAGATTTCCCCAACTGATAAA	Drosophila melanogaster CG8389 (CG8389)
Nop60b / Uhg6	snoRNA:Psi18S-1820-RA	ACCCCATGATATTAAGCCGGCAGGTGCCTGCAATCCCCACGGGCACCTGTGACTATGATTGGGAACAGCAAAGCTGCTGATGTGTGTATGTTGGGCAGCGCTCTTATCCTGCGCGCTCGACAAAGAATATTCGGTCGACA	box H/ACA
	snoRNA:Me28S-G1083a-RA	CGTTATCTGATGAGCAATAACTTTCGCCCCTAGCTGAAAAATGATACTTCTCATGTTGAATGCGAGATTGGTCTTACTGAAAAT	no exact matches
	snoRNA:Me28S-G1083b-RA	TTAGTTCTGATGAGCATTAACTTTCGCCCCTATCTGAAATTGAAACTTCTCTTGTTGAATGCGAGATTGGTCTTACTGAAAAA	no exact matches
	snoRNA:Me28S-G1083c-RA	ATTATCATGATGAGCATTAACTTTCGCCCCTATCTGAAATTGAAACTTCTCATGTTGAATGCGAGATTGGTCTTACTGAAAAG	no exact matches
	snoRNA:Me28S-G1083d-RA	TTTTAAGTGATGAGCTTTAACTTTCGCCCCTATCTGAAATTGAAACTTCTCCTGTTGAATGCGAGATTGGTCTTACTGAAATG	no exact matches
	snoRNA:Or-CD9a-RA	AATTAACTGATGTAAAAAAAAAACTGAATTATGTGGCATGATTTTCACATTAACCGCAACAAATCCTACTCCAATAGGTCCTACTGACAAT	Drosophila melanogaster mediator complex subunit 1 (MED1)
	snoRNA:Or-CD9b-RA	GTGAAAATGTTGAAATAAAAATACTGATTTATGTGGCATGATTTTCACATTAACCGCAACAAATCCTACTCCAATAGGTCCTACTGAATAT	Drosophila melanogaster mediator complex subunit 1 (MED1)
Uhg7	snoRNA:Me28S-A2634c-RA	TTTATTGTGATGATATTTTGAGTAGGAATCTCATTGAGCCTCAGTCATTCGTTGCTTTGAAATTAATTTTGTCTCTCACTGATTGC	Drosophila melanogaster CG32662 (CG32662)
	snoRNA:Me28S-A2634b-RA	TCTGCTCTGATGATATTTCGAGTAGGAATCTCATTGAGCTACCTGTAGCTATGAAATCAATTTTAATCTCCCACTGATCAA	no exact matches
	snoRNA:Me28S-A2634a-RA	ACTTAGCTGATGATATTACGAGTAGGAATCTCATTGAAATAACCATGAAATCAATTTTATCTCCACTGATAGC	Drosophila melanogaster CG5708 (CG5708)
			Drosophila melanogaster alpha-Esterase-5 (alpha-Est5)
Uhg8	snoRNA:Or-CD11-RA	ATAAATGTGAAGAGCATTCCACGTAATTACTTAGTGCACAAGTTAAGTGTGCTTGACTATTCCGTATATATAGGCAAAGAAATGAAAAT	no obvious box
	snoRNA:Me18S-U1356a-RA	CCCAAATTGATGACAACTTCATACCCAAATCAGAGAAATAATGTTGAAATCTTTTTAACATGCATCACCATCTGAATAA	Drosophila melanogaster UDP-glycosyltransferase 37b1 (Ugt37b1)
			Drosophila melanogaster CG9106 (CG9106)
			Drosophila melanogaster chemosensory protein B 38b (CheB38b)
	snoRNA:Me18S-U1356b-RA	CCTTAATTGATGACAACTTCATACTCAAATCAGAGAAATTATGTTGAAATCCTTTTAACATGCATCACCATCTGAATCA	Drosophila melanogaster UDP-glycosyltransferase 37b1 (Ugt37b1)
			Drosophila melanogaster CG9106 (CG9106)
			Drosophila melanogaster chemosensory protein B 38b (CheB38b)
	snoRNA:Me18S-U1356c-RA	GCCTTCTTGATGACAACTTCATACCCAACTCAGAAAAACTATGTTGAAATCTTTTTAACATGCATCACCATCTGATTAA	Drosophila melanogaster UDP-glycosyltransferase 37b1 (Ugt37b1)
			Drosophila melanogaster CG9106 (CG9106)
			Drosophila melanogaster chemosensory protein B 38b (CheB38b)
